# Supplementary material for: Molecular Mechanism of Response and Adaptation of Antioxidant Enzyme System to Salt Stress in Leaves of Gymnocarpos przewalskii
Source: MDPI journal article supplement (doi:10.3390/plants12193370), 2023-09-25
Supplement: s1 [file s1]

**CDS sequence of SOD, APX and CAT gene family members in *Gymnocarpus przewalskii***

>GpFSD2

ATGAGTATAACCTCACCTTTTCATGCTGCTGCTTTTATTCCCTCAATTAAATTTCCAAGTC  
CTTCTTTTCAGCAGAAAAGACGACATCAGGGACTGAGAAGAGGGACTAAAGTTATTGC  
TTATTACGGCCTTAAAAAACCTCCATATAACCTGGATGCATTAGAACCATATATGAGCCA  
GAAAACACTTGAGTCACACTGGGGGGAGCATCATAAGGGCTACCTGGATGCTCTAAAC  
ATACACTTAAGTAGGAGCGACATATTATATGGCTATAACCATGGATGAACTTGTGAAAGTG  
ACTTATAACTATGGAAATCCTTTGCCTGAATTTAATGCTGCGGCACAGGTCTGGAATCA  
CGACTTTTTCTGGGAGTCCATGCAACCTGGAGGCGGGGATTTACCAAAGCTTGGACTT  
CTTCAGAAAATTGAGAAAGATTTTGGTTCTTTTGCGAACCTTTAAGGAGAAGTTTATAGA  
GGCAGCCGTGACATTATTTGGCTCTGGCTGGATTTGGCTTGTTTTGAAGAGGAAAGAG  
AAGCGTCTCGCAGTAGTTAAGACATCAAATGCAATCACTCCTATCGTATGGGATGACAT  
TCCCCTCATATGCTTGGATATGTGGGAGCATGCTTATTACTTGGATTACAAGAATGATAG  
AGCAGAGTATGTAAATGCTTTTATGAACCACCTTGTATCATGGCATGCAGCAACAGCAC  
GCATAGCTCGAGCGCAGGCCTTTGTCAATCTAGGAGAACCAAAAATTCCGGTTGCCTG  
A

>GpCSD4

ATGAGATTTATGAGGGCAATGTACACCACAACAACCATCGCCATAGCAACAGCATCAG  
CTCTCCCTGCTGTTTTTCTCTCCTCATCTTGTTCTTCGCCGGATTCGAAACCGCGTAACT  
TGCGATTTCTAACTCCAAATACAATCTTAGTTAAAAATATGAGCACTTCTCCTTCAGCTG  
TTCAGATGAAGTCTCCCTTGCAGGATAGTATCTCGTTGCCGGAATTAGTGACGGAGTTT  
ATGGTGGACATGAAGTGCGAAAGCTGTGTGCGATGCTGTCAGGAGTAAATTAGAGACTG  
TGGGAGGAGTGAAGAATGTTGAAGTGGATTTGAGCAATCAAGTTGTTAGGATTCGCGG  
TTCTTTACCTGTAAAAAGCATGGAAGAGGCTTTGGCACAAACAGGTCTGTAAAGCTAAA  
TTAATTGGTCAAGGTGTACCTGAAGATTTCTTATATCCGCTGCTGTTGCTGAATTCAA  
GGCCCTGATATCTTTGGAGTTGTCCGCTTTGCCCAGGCAAACATGGAATTGGCTAGAAT  
TGAGGCCAATTTTAGTGGATTATCACCTGGTAAACATGGTTTGTCTATAAACGAGTTTG  
GTGATCTGACTAGAGGTCCAGCCAGCACGGGGAAAATGTACAACCAACAATCCAAG  
GAAGTGAAACAGAGCCATTGGGCGACCTGGGAACATTGGAGGCTGATGAGAGAGGTG  
AAGCATACTATTACAGGCATTAAGAAGAAGCTTAGGATAGTAGATTTGATTGGACGGTCC  
GTTGTGTTATATGAACTGAGGACAAGTCAGATCCTGGCCTCGCAGCTGCAGTGATTG  
CTAGAAGCGCTGGAGTAGGGGAGAACTACAAAAAGCTGTGCACTTGTGATGGAACCA  
CAATTTGGGAGGCCAAACCCGATTTTGTCACTAGCAGAGTCTAA

>GpCSD3

ATGGGCACACCACTTAAAGCAGTTGCTGTTATCTCTGGCTCTCCTAATGTCAAAGGCTC  
TCTTCACTTTATTCAAGACTCTTCTGGAGTAACCCATGTGAAAGGAAGAATTATAGGGC  
TAAGCCCTGGACTCCATGGTTTCCATATTCATGCCCTTGGTGATACCACTAATGGCTGCA  
ACTCTACTGGGCCACATTTTAATCCAATGAAGAAGAATCATGGAGCTCCTTATGACAAG  
GAAAGGCATGCTGGTGATCTTGGTAACGTTGTTGCTGGAAATGATGGTATCGCTGAGGT  
CTCTATTAGAGATGCCCAGATACCTCTTACTGGGCAGCATTCAATACTTGAAGGGCTG  
TTGTGGTGCATGCTGACCCAGATGATCTTGGAAGAGGAGGACATGAACTCAGCTTGAC  
AACAGGAAATGCTGGCGCGAGAGTAGGATGTGGCGTCATCGGACTACAGTCATCTGTT  
TAA

>GpCSD1

ATGGGAAAGGCGGTCGCCGTTTTGAGCAGCAGTGAGGGTGTCAAGGGAAGTGTTC  
TTTGCCCAAGAAGGAGATGGTCCAACAACTGTGACTGGAAGTATCTCGGGCCTCAAGC  
CCGGGCTCCATGGATTCCATGTCCATGCCCTTGGTGACACAACAAATGGTTGCATGTCA  
ACTGGGCCTCACTTCAATCCTGCTGGAAAAGAGCATGGTGCTCCAGAAGATGAGGTTTC  
GTCATGCTGGTGATCTTGGGAACATTACAGCTGGGGATGATGGTACGGCTACCTTCTCG  
ATCATTGACAGTCAGATTCCCTCTTTGTGGTGCAAACCTCTATTGTGGGTAGGGCTGTTGT  
TGTCATGCTGATCCTGATGATCTTGGAAAGAGGGGGGCACGAGCTCAGCAAGACCACA  
GGCAATGCTGGTGGAAGAGTAGCGTGCGGTATTATTGGTCTTCAAGGCTAA

>GpFSD1

ATGTCTACAGTTGTTGCAACTTCTCCAGTTTCACTGTCTTCTTCCTTTCTTTCTCATGAT  
GTTTATAAGAGATTCAAGTCTACTCCTTTCTTACCTTGGGGTTCTGAAAAGAGGCGAGT  
AGGAAGAGCTGGTGCTGCAGTTGTTGCCAAGTTCGACCTGAAGCCTCCTCCATATCCA  
TTTGATGCACTGGAGCCTCACATGAGCAAACAGACATTTGAGTTTCATTGGGGGAAGC  
ATCATAGAGCCTATGTGGATAACTTGAACAAGCAGATAGTTGGAACAGAATTAGATGCG  
ATGTCGCTGGAAGATGTAGTACGTGTTACATATAACAAAGGCGATGTACTTCCATCCTTC  
AACAATGCAGCTCAGGCATGGAATCATGAATTCTTTTGGGAGTCCATGAAGCCTGCTG  
GTGGGGGAAAGCCGTCAGGGGAGCTTTTGGCTCAAATTGAGAAAGATTTTGGTTCTTT  
TGAAGCATTTGTTAATGAATTTAAGTCTGCTGCGGCCACACAGTTTGGTTCTGGCTGGG  
CTTGGCTTGTGTACAAAGCAAACGAGGTAGATGTTGGAAATGCTGAGAATCCTAAACC  
ATCTGAGGATGACAAAAAGCTTGTCATTGTTAAGAGCCCCAATGCCGTGAACCTCTT  
GTGTTTCGATTATTACCCTCTTCTAACTATTGATGTGTGGGAGCATGCATATTACTTGGACT  
ATCAGAATCGAAGGCCTGATTATATTTCCATATTCATGGACAACCTTGTTTCCTGGGATG  
CAGTCGGTGCAAGATACGAGACAGCTAAGGCCCTTGCTGCATAG

>GpMSD2

ATGGCGCTAAGAACATTGATGACTACCAGGAAAACCCTAGCTTTAACTCCTCTACAATG  
GCGGTCTTTACAAACCTTCACTCTCCCCGACCTTCCTTACGACTATGGCGCACTCGAGC  
CTGCTATCAGCGGCGAAATCATGCAGCTTCACCACCAAAAACATCACCAGACTTACGT  
CACTAACTACAACAAAGCTCTCGAGCAGCTCCACAATGCGACCGAGAAAGGCGATGC  
GAGCTCTGTTGTTAAGCTCCAAAGCGCCATCAAGTTTAATGGCGGAGGTCATATTAATC  
ACTCAATTTTCTGGCAAACCTTGCTCCAATTAAGGAAGGAGGTGGCGAGCCGCCAAA  
AAGCTCACTAGGATGGGCTATTGATTCAAACCTTCGGCTCTCTAGAAGCTCTGATCCAAA  
AAATGAATGCAGAAGGAGCTGCCTTGCAAGGTTTCAGGTTGGGTGTGGCTAGGACTTG  
ACAAGGAGTTGAAGACACTTGTGGTTGAAACCACTGCAAACCAGGACCCGTTGGTGA  
CTAAAGGCCCAAGTTTAGTTCCCTTTGGTTGGTATAGATGTTTGGGAGCACGCATACTAC  
TTACAGTACAAGAATGTCAGGCCTGACTATCTTAAGAACATTTGGAAGGTGATGAACT  
GGAAATATGCTAGCGAGGTGTACGAAAAAGAATGCCCTAGCCACTAA

>GpMSD1

ATGGCGTTACGAACATTGTTGACCAGAAAAACCCTACCTTCATCATCATCAGCAGCACT  
CCAATGGCGGTCGTTGCAGACCTTCACTCTCCCCGACCTTCCTTACGACTATGGCGCAC  
TCGAGCCTGCTATCAGCGGCGAAATCATGCAGATTCATCACCAGAAACATCACCAGAC  
TTACGTCACCAACTATAACAAGGCTCTTGAGCAGCTTCATGATGCGTCTGAGAAGGGT  
GATGCGACGACTGTTGTTAAGCTCCAGAGCGCCATCAAGTTCAATGGCGGAGGTCATA  
TTAATCACTCAATTTTCTGGCAAACCTTGCTCCAATTAAGGAAGGAGGTGGCGAGCC  
GCCAAAAAGCTCACTAGGATGGGCTATTGATTCAAACCTTCGGCTCTCTAGAAGCTCTG

ATCCAAAAAATGAATGCAGAAGGAGCTGCCTTGCAAGGTTTCAGGTTGGGTGTGGCTAG  
GACTTGACAAGGAGTTGAAGAAGCTTGTGGTTGAAACCACTTCAAATCAGGACCCGT  
TGGTGACTAAAGGCCCAAGTTTAGTTCCCTTGGTTGGTATAGATGTTTGGGAGCACGCA  
TACTACTTACAGTACAAGAATGTCAGGCCTGACTATCTTAAGAACATTTGGAAGGTGAT  
GAACTGGAAATATGCTAGCGAGGTGTATGAAAAAGAGTGCCCTAGCCACTAA

>GpAPX6

ATGAGGACCACTTTCTGGGAAACCTCTTCCTTCACTTCCCATTTCATCCTCTTTCCTTATT  
CTTTCCAAACTTCCCTACACATTTTCACATCCAAGTCCATTTTCGTGCCAAATTAAGT  
CCCTCCTTTTCTACTCCACCTTCTTATGATAACTATGCCAATTCTGCATCATGTGGAAGG  
AGAGGCCTCTTTTTCCCTTCCGTCACTATGCCGTTTCTTTCCCTCCTGCCAGATTATGTG  
AAATACTTTCAAGCTGAAGCCAAAGAGTATGGAAGTCTGAGTACTCTCTAATACAGG  
ATGAGATCAGGAAGGTTTTGTCCAAAGGAAAGGCTGCTGGTGTACTTCGTCTTGTCTT  
CCATGATGCAGGAACATTTGAAAGCAGTGATAACTCAGGTGGTATGAATGGCTCTGTAG  
TATATGAACTTGACAGACCTGAGAATGCAGGGCTCAAAAAATCTCTGAAGATTCTTGA  
GAAAGCAAAGAATGTGCTGGATGTGAAACAATCAGTGTTCATGGGCAGACCTGATTGCT  
GTGGCTGGAGCTGAGGCAGTCTTATTATGTGGGGGTCCAGTGATCCCCATTTCGAGTTGG  
GAGACTTGATTCACTAATTCCTGATCCCGAAGGGAAACTACCTGAGGAATCACTGGAT  
GCACCACGACTGAAGCAATGTTTTCAAAAGAAAGGCTTCTCGACACAAGAACTTGTT  
GCACTGTCTGGAGCCCATACTCTTGGTAGCAAAGGTTTCGGAAACCCTATTGTATTGA  
CAATTCATATTACAAAATACTCCTTGAGAAGCCATGGAGGTCATCGGCTGAAATGACTA  
GTATGATTGGACTTCCTTCAGATCGTGCCTAGTCGAAGATGATGAATGTTTAAGATGG  
ATTACAGAGTACGCCAATGACCAAGATATGTTTTTCGAGGATTTTAAGAATGCCTACATC  
AAGCTAGTCAATTCTGGTGTTAGTTGGAGAGCTTCATGA

>GpAPX1

ATGGGAAAGAGTTACCCAAGTGTAGTGAGGACTACCAGAAGGCTATCGAGAAGGCC  
AAGAAGAAGCTCAGAGGTCTTATCACTGAGAAGCAATGCGCTCCCCCTTATGCTTCGTC  
TGGCATGGCACTCTGCTGGTACTTTTGACTGTCAATCAAAGACTGGAGGACCTTTTCGG  
AACTATGAGGTTTCGCTGCAGAGCAGGCTCACGGTGCTAACAATGGTATTGACATTGCC  
ATCAGGTTGCTCAATCCCATCAAGGAGCAGTTCCCCACCATTCTTACGCTGACTTTTAT  
CAGTTGGCTGGAGTTGTTGCTGTGCAAGTTACTGGTGGACCTGAAGTTCCCTTCCACC  
CTGGCAGAGAGGACAAGACCGAGCCACCACAGGAAGGACGTCTCCCTGATGCCACCA  
AGGGTTGTGACCACTTGAGGGATGTCTTCATTAAGCAAATGGGTCTTACTGACCAGGA  
CATTGTTGCTCTCTCTGGAGGCCACACTCTGGGAAGGTGCCACAAGGAGCGCTCTGGC  
TTTGAGGGAGCTTGACCTCCAACCCTCTGGTCTTTGACAACTCTTACTTCAAGGAGC  
TTCTGACTGGTGAGAAGGAAGGTCTCTTGCAAGTTGCCGTCTGACAAGGCTCTTCTGTC  
TGACCCTGCCTTCCGCCCATTTGTTGAGAAATATGCAGCGGATGAGGATGCATTCTTTG  
CCGACTATGCTGAGGCTCATATGAAGCTTTCTGAGCTTGGGTTTGCTGATGCTTAA

>GpAPX7

ATGAGCGAGAGCCTAAGAATGACAACACCCTTAGCTATCACTGCATCCTCCCGCCTTGT  
GCCCTCCGCCGCTACTCTTCTGTTTCCCGACTATCTCTCCCTTCTTCTTCACTGAAGGT  
GAAATGGGGGAGATCAACGGCGCCTCTACTATCAAACCTCCCTTTGCTTAGGAAGACA  
AGAGGAGCTAATCTTCACCGGAGTTTCACCACCAAATGTTACGCCTCTGATCCTCAGC  
AGCTCCAGAGTGCCCGTCTTGATATCAAGCGCCTCCTCTCCTCCCACTTTTGCCATCCT  
ATCTTGTTTCGGTTGGGGTGGCACGATGCTGGTACTTATAACAAGGACATCCCTGATTG

GCCTCAAAGAGGGGGTGCCAATGGTAGTCTCCGCTTCGAGGTCGAGCTCCAACACGG  
CGCCAATGCTGGTCTTGTGAATGCCTTGAAGCTACTAGCGCCCATCAAAGACAAGTAC  
TCTGGAGTGACATATGCTGATCTGTTCCAGTTGGCTAGTGCTACTGCTATTGAGGAGGC  
TGGTGGTCCTAAGATACCCATGAAGTATGGAAGAGTGGATGTTACAGGGCCTGAGCAG  
TGTCTGAAGAAGGAAGGCTTCCTGATGCTGGACCTGCATCACCTGCTCAACATCTGC  
GCGATGTTTTCTATAGAATGGGTCTCAATGATAAGGAAATAGTTGCATTATCTGGAGCAC  
ATACATTGGGAAGGTCTAGACCTGAACGCAGTGGTTGGGGCAAGCCAGAACTAAATA  
TACGAAAGACGGACCAGGAGCTCCTGGTGGACAGTCATGGACAGTGCAGTGGTTGAA  
GTTTGATAATTCCTATTTCAAGGACATCAAAGAAAGGAAAGATGAAGATTTACTCGTTT  
TGCCAACTGATGCTGTTCTCTTTGATGATCCATCTTTCAAGTTGTATGCTGAGAAATATG  
CTGCTGATCCTGAAGCTTTTTTTTCGGACTATGCTGAAGCACATGCCAAGCTTAGCAAC  
CTTGGAGCGAAGTTCGACCCACCTGAGGGTTTTGCCCTAGATGAAGCTTCTGCAGGAG  
CAGGTCCGGAGAAGTTTGTAGCAGCCAAGTACTCATCTGGCAAGAAAGAGTTGTCAG  
ATTCAATGAGGCAGAAGATTCGTGCAGAATATGAAGCATTGGGTGGCAGCCCTGATAA  
GCCTCTCCCGACAACTATTTCTAAACATTATGATTATTATAGCTGCTTTGGCAGTTTGA  
ACCTATCTTACAGGAACTGA

>GpAPX3

ATGGCGATGCCGGTAGTAGACACGGAATACCTTAAACAAATAGACAAAGCTCGCCGCG  
ATCTCCGTTCTCTTATTTCTCTCGCAACTGCGCTCCTATCATGCTCCGTCTCGCGTGGC  
ACGACGCAGGCACGTATTGCGCGAAGACGAAGACAGGTGGGCCCCAACGGTTCCATCA  
GGAACGAGGAAGAGTGTGCTCATGGTGCTAATAATGGTCTCAAGAAGGCCATTGATTG  
GTGTGAGGAAGTTAAAGCTAAGTATCCAAAGATCACATATGCAGACTTGTATCAGCTTG  
CTGGTGTGTTGCGGTTGAGGTGACCGGAGGGGCCAACCGTTGACTTTGTTCTGCTAG  
AAAGGACTCCATGGTATCTCCCAACGAAGGGCGGCTTCCAGATGCCAAACAAGGTGC  
ACCACATCTGAGGGACATATTCTATCGGATGGGTCTCACTGACAAAGACATTGTAGCCC  
TTTCGGGAGGTCACACCTGGGGAGGGCTCATCCAGAGAGATCAGGTTTTGATGGCCC  
TTGGACCCAAGAGCCCCCTTAAGTTTGATAACTCCTATTTTGTTGAACTGCTGAAAGGGG  
AATCAGAGGGGTTGCTGCAGCTTCCTACTGACAAAACCTCTGGTGAAGATCCAGCATT  
TCGCCCTTATGTTGAGCTCTATGCTAAGGATGAGGATGCGTTCTTCCTCGACTACGCTG  
CTTCACACAAGAACTCTCTGAACTAGGCTTTACTCCTGGTGGGTCAAAGTCAGGTCC  
CAAGGACAGCATTGTATTGGCTCAAAGCGCGGTTGGGGTTGCAGTGGCCGCAGCTGTG  
GTCATCCTGGGTACATCTATGAAGTACGCAAAAGAGTGAAGTGA

>GpAPX10a

ATGGCACAAATGGTAAGAAGAGAAGGGCAAATAGTAGATGCAGAATACCTGAAACAA  
ATTGAGGAAGCTCATAGAGACCTTCACAATCTACTCTCCCACAACAAGCAGTTTGCTC  
CTATTGTGCTTCGAATGGCATTTCATGATGCAGCAACTTATGATGTTAGGACTAACAAATG  
GAGGTCCAAATGGTTCAATAAGGAATGAGTTGAACAATCCTGCTAACAAGGGATTGA  
GAAGGGAGTTGTTTTTGTGTAACCAAGTGAAGAAGAGACACCCTAAGATAACTTATGCT  
GATCTTTATCAGCTTGCTGGAATAGTTGCAATTGAGGTCACAGGAGGTCCTAAGATCCC  
TTTCACCCCAGGTCGAAAGGATGTTTTGCAACAGCAAGACAAAGGAAGCGTTCCCAA  
TCCCAATGGAGGTGCTCAACATTTGAGAGATGTATTTATCGTATGGGTCTGTCTGACA  
TGGATATTGTGGTGCTATCAGGGGCACATGCACTGGGAAGGGCACATAAGGATAGATC  
AGGATTTGATGGTCCTTTTACAAGGGACCCTTTGAAATTTGACAATTCCTACTTTGTGG  
AGCTTATGAAGGGTGACAGCCAGGGCTGGTGAAGTTTCCTACTGATAAATCTCTCTTG

AAAGACCCTGTCTTCCGTCCCCTTGTCGAACACTATGCTAAGGATCAGAAAGCATTCTT  
CAGAGACTATGCTGCATCACACAAGAAGCTATCAGAGCTTGGGTTCCACCCTCTTGAC  
ACTATTCCCACCCCCACCCACAAACCCATGCACACTCGCACTCACACTCACACCAAC  
ACCAGCACCTAACTAGCCACCAGCGCCATGCGCATCCACACTCTCACCCTGCTCACA  
GCCAATGCCACCCTGCCATGGATTTGCTTGA

>GpAPX10

ATGGCCATGAAAGTTCCAGTGGTAGATGCTGATTATTTGAAGGAAATTGAGGCTGCTCG  
CAATGATCTTCGGTCCCCTTATCGCTAACCCAGCGTTGCGCTCCTATCATGCTTCGCTTAGC  
ATTTACGATGCAGGAACTTATGACGCGAAAACAAAAACAGGGGGTCCAAATGGTTCA  
GTAAGATTTGAGCTAAACAGCCCTGCCAACAATGGCATCAAAGTTGCTGTTGATCTTTG  
CGAACAAGTGAAGGCTAAACATCCCAACATTACTTATGCTGACCTCTATCAGCTTGCTG  
GAGTTGTTGCAGTTGAAGTTACCGGAGGGCCTGCTATCAATTATGTTCCAGGTCGACCT  
GATGTCCTGCAAGCACAAAGACAATACCGGAAATCTTCCAGTACCTACTGGAGATGCTC  
AGCATTTGAGAGATGTGTTCCACAGAATGGGTCTTAATGACAGGGATATTGTTGCTACTA  
TCAGGATCACATACTCTGGGAGGAGCGAAGCGGGATAGATCAGGAGTTGAGGGTAATT  
TTACCAAGGAGCCTCTGAAGTTTGACAATTCCTATTATGTAGAGCTGAGGAATGCTAAT  
CCCCCGCCGGAGCTTGTGAAATTTAACACAGATAAGGTTCTTAAGGAGGATCCTGTATT  
CCGTAAATATGTTTCAGCTTTATGCTAAGGAGCAACATACATTCTTCACACATTATGCAGA  
ATCACACAAGAAGATGTCAGAGCTTGGACGCCCTGTTACGCTTGA

>GpCAT1

ATGGATCCTTACAAGTTTCGACCGTCAAGTGCTTACAATTCGACATACTTCACAACGAA  
TTCGGGTGCTCCTGTTTACAATAACAACCTCTTCCTTGACTGTTGGTACCCGCGGTCCCA  
TTCTTTTGGAGGACTACCATTGTTGGTGGAAAAGCTTGCCAACTTTGACAGGGAGCGTAT  
CCCAGAACGTGTAGTTCATGCTAGGGGAGCTAGTGCTAAGGGGTTCTTTGAAGTGACC  
CACGATATTTCTCACCTTTCATGTGCTGATTTCTGCGTGCTCCCGGTGTTTCAGACACCT  
GTCATTGTTTCGTTTCTCCACTGTTATTCATGAACGTGGAAGTCCTGAAACACTTAGGGA  
TCCTCGTGGTTTTGCTGTAAAGTTTTATACCAGAGAGGGTAACCTTGATCTGGTAGGGA  
ACAACCTCCCTGTGTTTTTCGTCCGTGATGGTATGAAGTTTCCTGATATGGTGCATGCTT  
TGAAACCCAACCCCAAAAATCACATCCAAGAGAACTGGAGGATCATGGATTTCTTCTC  
TCACCATCCAGAGAGCTTGACATGTTTACTTTTCTCTTTGATGATATTGGTGTTCAGC  
TGACTACAGGCACATGGAAGGGTCTGGTGTAAACACATACATGTTGGTTAACAAGGCT  
GGCAAAGCTTATTATGTGAAGTTCCACTGGAAGCCAACCTGTGGCGTGAAGTCCTTGT  
TGGAGGATGAGGCCATAAAAGTTGGGGGAGCTAACCCAGCCATGCAACCCAGGACC  
TTCATGACTCAATTATGGCTGGGAACCTACCCTGAATGGAACTGTTTCATCCAAACAATA  
GACCCAGCAGATGAAGATAAATTTGACTTTGACCCACTAGATGTTACCAAGACATGGC  
CAGAGGACATTTTGCCCTACAGCCAGTTGGACGCTTAGTCTTGAACAAGAACATTGA  
CAACTTCTTTGCTGAAAATGAGCAGCTCGCATTTTGCCCTGGTATTGTTGTTCTCTGGTG  
TTTACTACTCAGATGACAACTGCTTCAAACCTCGAATCTTCTCGTACTCTGATACCCAG  
AGACACCGTCTTGGTCCCAACTATCTGCAACTTCCAGTTAATGCCCCCAAGTGTGCTCA  
TCACAACAATCATCATGATGGCTTCATGAACCTTCATGCACAGGGATGAGGAGGTCAAC  
TACTTCCCCTCAAGATATGATCCTGTTTCGTCACGCTGAGAAATATCCCATTCATCTAAT  
GTATTGAATGGGAAACGTGACAAGCAAGTCATAGTGAAGGAAAACAACTTCAAGCAA  
CCTGGAGAGAGATACAGATCATTTGACCCAGCCAGGCAAGAGAGATTTCATCCAAAGAG  
TGATTGATGCTCTATCTGATCCTCGTGTCACACACGAGGTTTCGTGCTATTTGGGTTTCAT

ACTGGACACAGGCTGACAAATCTTTGGGCATGAACTAGCAAGTAGACTTAATGTGAG  
ACCAACCATGTGA

>GpCAT2

ATGGATCCCTACAAGTACCGACCGTCAAGTGCTTACAACACCCCCCTCCTTGACCACTAA  
GCCTGGTGAACCAGTATACAACGACAATTCATCATTGACAGTTGGTCCTAGAGGTCCA  
AGTCTGTGGGAGGATTACCTTCTGATAGAGAAGATCACCACCTGGACTCATGAGCGTAT  
ACCAGAGCGTGTTGTTTCATGACAGGGGAGCCAGTGCTAAGGGTTTCTTTGAAGTCACC  
CATGAAATTACTCATCTCACTTGTGCTGACTTCCTCCGTGCTCCTGGAGTTCAGACTCC  
TGTCATCGTTCGTTTCTCCACTGTTATTCATGAGCGTGGTAGCCCTGAAACCCTCAGAG  
ACCCTCGTGGTTTTCGCTACCAACTTCTACACCCGAGCGGGTAACCTTTGACTTGGTGGG  
ACCCAAGTTCCAGTATTCTTCACTCGGGATGCAATGCAATTATTTGATCTTATACGTGC  
ATTCAAACCCAACCCGAAATCTCAAATCCAAGAGGACTTGAGGTTTCTAGACCACTGC  
TCTACCTCCCGGAGAGTATGACCACATTCACATTCTTCTATGATGATATGGGTATTCTT  
CAGGACTACAGACACATGATAGGTTCTGGTGTCCACACTTTTACTATGCTTAACAAGGC  
AGGCAAGGTCACCTATGTCAAGTTCCACTGGCGGCCAACATGTGGTATCAAGAACATG  
TTGGAAGAAGAGGGCCGCTAAAGTTGTAGCAGGCAACCACAGCCATGCTACGAAGGAT  
CTGTGGGACTCAATTGCATCAGGAACTCCCCTGAATGGAAGCTCTTCATCCAAACAA  
TGTATCCAGCTGATGAAGACAAGTTTGATTTTGACCCGCTTGATACTACAAAGACATGG  
ACAGAGGACATTCTGCCGTTGCAGCCTGTGGGGCGTATGGTCTTGAACAAGCACATCG  
ACAACCTCTTAATGTAG

**CDS sequence of SOD, APX and CAT gene family members in *Heliosperma pusillum***

>HpCSD1

ATGGTGAAGGCTGTGGTCGTTTTGAGCAGCAATGAGGGTGTTAGCGGAACTGTCC  
ACTTCACTCAAGAAGGAGATGGTCCAACAACCGTAACTGGACACATGACGGGTC  
TCAAGCCTGGGCTCCACGGATTCCATGTTTCATGCCCTTGGTGACACCACAAACGG  
TTGCATGTCAACTGGACCACACTTTAACCAGCTGGGAAAGAGCACGGTGCTCCA  
GAAGATGATGTCCGCCATGCTGGTGACCTTGGAACATCACAGTTGGAGATGATG  
GTAGTGCAACCTTTACAATCATTGACAATCAGATTCTCTTTGTGGACCCAACTCT  
ATTGTGGGAAGAGCTGTTGTTGTTTCATGCTGATCCGGACGATCTTGGAAGAGGGG  
GTCATGAGCTCAGCAAGAGTACCGGTAATGCTGGTGGAAGAATTGCTTGCGGTGT  
AATTGGTCTTCAAGGCAATATCTGA

>HpCSD1a

ATGGGAAAGGCTGTGTCGTCTTGAACAGCAGTGAGGGTGTCAAAGGAACTGTC  
CACTTCAATCAAGAAGGAGATGGTCCAACAATCGTGACTGGAACCTATCTCGGGTC  
TCAAGCCTGGTCTCCATGGATTCCATGTTTCATGCTCTTGGTGACACTACAAACGGT  
TGCATGTCTACTGGACCACACTATAACCCTGCTGGGAAAGAGCACGGTGCTCCAG  
AAGATGAAGTTCGCCATGCTGGTGACCTTGGAACATCACAGCTGGGGATGATG  
GTACCGCAACCTTCACAATCACTGACTGTCAGATTCTGTCTTCCGGACCACACTCT  
ATTGTGGGAAGGGCTGTTGTTGTCCATGCTGATCCTGATGACCTTGGAAGGGGGG  
GTCATGAGCTCAGCAAGACCACCGGTAATGCGGGTGGAAGAATTGCTTGCGGTA  
AGCTGCTCTTAATCTGCATCTGTTTTTGCTACGTCATTGATCTGTAA

>HpCSD4

ATGAGTTTGCCGGAATTAGTGACGGAGTTCGTGGTGGATATCAAAAGTGAAGAA  
TGTCTAACTTGTATCACCAATAAACTAGAGACGGTCCAAGGAGTGAAGAGTATTG

ACGCGGACTTGAGCAATCAAGTCGTTAGAATTCGCGGTTATTCCCCTCTCAAAAC  
CATGGAAGAGGCTTTAATTCAAACAGGTCGTA CTGCTCGCCTTATTGGTCAAGGA  
ATGCCTGATGATTTTCTCGTATCTGCGGCTGTGGCTGAATTCAAAGGCCCTGATAT  
ATTTGGAGTTGTTTCGTTTAGCCCAGGCAAATATGGAATTAGCTAGAATTGAGGCC  
AATTTTAGTGGGTTGCCACCTGGAAAGCATGGTTTCTCAATAAATGAATACGGTG  
ATCTGACAAGAGGTCCAGCCAGTACTGGGAAAATGTACAGTCCGCCAATCCAAG  
GCAGTGAAACTGAGGTATTCTCCCCTTGTTCAAATAAGATTGATCACCATTTCATT  
TAG

>HpFSD1

ATGTCTGCTGTTGCTGCGACTTGTTTCTCATCCTTGTCTTCAACATTTGTTTCTCAT  
CATCCAGGCTCTAATTGGGGATCTAAGTCTATCCCCTCACACCTTTGAGATTTAA  
GCAAACACATGTAAGAAGAGCTGGAGCTGCTGTAGTAGCCAAGCTTGAGTTGCA  
GCCTCCGCCATATCCATTTGATGCCTTGAGGCCTCACATGAGTAAACAGACTTTT  
GAGTTTCATTGGGGGAAGCATCATAGATCATATGTTGATAACCTGAACAAACAAA  
TAGTTGGAACAGAGTTAGATGGAAAGTCACTTGAAGATATAGTGAGTATAACAT  
ATAACAAAGGTGAAATGCTTCCATCTTTCAATAATGCAGCACAGGCCTGGAATCA  
CCAGTTCTTTTGGGAGTCGATGAAACCTGGTGGCGGGGGGAAGCCATCTGGAGA  
ACTTTTGGCTCAAATTGAGAAAGATTTTGGTTCTTTTGAAGCATTTGTTACTGAAT  
TCAAGTCTGCTGCTGCCACACAATTTGGTTCTGGTTGGGCTTGGCTTGCTTACAAA  
ACGATGAAGCTGGATGTGGGTAATGCGATAAACCCCTAGACCTTCTGAAGATGAC  
AAAAAGCTTGTGATTGTAAAGACACCCAATGCTGTAAACCCTCTTGTTTGGGGTT  
ATAATCCTCTTCTGACCATTGATGTTTGGGAGCATGCATATTACTTGGACTACCAG  
AATCGAAGGCCGGATTACATCTCAATATTCATGGAGAATCTTGTTTCCTGGGATG  
CCGTCAGTGCAAGATATGAGGCCGCCAAGGCACTTGCTGCTTAA

>HpFSD2

ATGGGAAGTTGTACTACTACTTTTCATACTGTCTCTTCTCTCCATTGTATTGATTTT  
TCTTCCACTAGTAAAAATCCAAGGTTAATTCCTCAGAAGCGTATAGGATGCCTTG  
GACGAAGAAGAGGACCTAAAGTAGTTGCGTATTATGGGCTAAAGAAGCCTCCTT  
ATAACCTAGATGCTTTGGAACCATATATGAGCAGAAAGGCACTCGAGTTACATTG  
GGGAGAGCATCATAAAGGCTATGTGGATGCTTTAAACAGACACCTAAGTAAGAG  
TGACATACTATATGGCTATACCATGGATGACCTTGTTAAAGTGACATACAACCTAC  
GGAAACCCCTCACCGGAATTCAATGATGCTGCACAGGTTTGAACACGAATTTT  
TCTGGGACTCCATGCAACCCGGAGGCGAGGATTACCAAAGCTTGGACTGCTTCG  
GCATATTGAGGAAGATTTTGGTTCTTTACAAATTTTAAAGAGAAATTTACCGAG  
GCAGCCCTTACATTATTTGGTTCTGGCTGGGTTTGGCTTGTTTTAAAGAAGGATGA  
AAAGCGTCTAGTGATAGTTAAAACATCAAATGCAATCACTCCCATCGTATGGGAT  
GATATACATGCTTATTATTTGGATTACAAGAACGATAGAGCCAAGTATGTAAATA  
TATTCATAAACCACCTTGTATCGTGGCATGCAGCCACTGCACGAATAGCTCGAGC  
TCAGTCTTTTGTAAACCTAGGCGAACCTAATATTCCCATCGCTTGA

>HpMSD1

ATGGATGTTAACATAATGTTATTGCAGGAAGGAGGTGGCGAGCCTCCAAAAAGC  
GCTTTGGGTTGGGCTATTGATTCAAATTTTGGCTCTCTTGAAGCTCTTATTCAGAA  
AATGAATGCCGAAGGAGCTGCCTTACAAGGTTCTGGTTGGGTGGATCCACTGGTA  
ACTAAAGGGGCAACTTTGGTTCCTTTACTTGGTATAGATGTCTGGGAGCATGCTT

ACTACTTGCAGTACAAGAATGTGAGACCTGATTATCTGAAGAACATATGGAAGGT  
TATGAACTGGAAATATGCCTGTGATGTTTATGAGAAAGAGTGTCTAGCACTTAA  
>HpAPX6

ATGATGACCACCTTCAACAACCCACCATTTTTAAGCTGCTGCTTCACTTCCCTATCTTCT  
CCATTCATCACCAACTTCATTTTTACCGCCAAATTTCAACCTCAAACCTGTTAATTTGGC  
GCCAAATCAGCTGCATTACTCAAACCCACTTGCGCAATTCAACCATCTTCTGGTGGCTG  
TGGGAACCTTGAATCATGTGGAAGAAGAAGACTTCTTTTGCTTTCTGCAACAGTGTCT  
TTTCTTATTCATATGCAGGAATACACCAAAGATTTCTATGTTCAAGCGGAAGAGCTGGA  
AACTTATGGGGACCAAATTGTAAGAGATGAAGTAAGGAAGGTTTTGACTAAAGGGAA  
GGCTGCTGGTATTCTTCGTCTTGTTTTTTCATGATGCAGGAACCTTTGAAAGCAACAACA  
ATTCAGGTGGTATGAACGGCTCTATAGCATATGAACTTGAAAGACCAGAGAATAAAGG  
GCTAAAGAAATCTTTGAAGGCATGCTTTCACACTTCTTACTCCCGACCCCTTTCTCCTC  
ATATTATCATTGATGATAGCATTCTTGAGAAAGCCAAGAAAGAGTTGGATATGCGAGAA  
TCAGTGTGATGGGCTGACCTGATTGCTGTAGCTGGAGCTGAAGCAGTCTCAATATGTG  
AGGTCCGGTGATTCCTATTCGGGTGGGAAGACTTGATTCTTTGACTCCTGATCCTGAAG  
GGAAGCTGCCCCGAGGAATCACTAGATGCGCCAGGACTGAAAGAGTGCTTTAAAAGAA  
AAGGCTTCTCGACTCAAGAACTTGTGGCGCTGTCTGGGGCCCATACAATTGGTAGTAA  
AGGTTTTGGAAGCCCCATTGAATTTGATAATTCATACTACAAAATCCTACTTGATAGGCC  
TTGGGCATCAGCAGGTGGAATGTCAGGTATGGTTGGACTTCCTTCAGATCGTGCACTG  
GTCGAGGATGAAGAATGCTTAAGATGGATTAAAAAATACGCGAAGGATCAAAATTTGT  
TTTTCGATGATTTTAAGGATGCTTACATCAAGTTGGTCGATTCGGGCGCAAGGTGGAAA  
TCTTCATGA

>HpAPX7

ATGGAGGATTTTTCTTTTAGAGTTTTTTCCCAAGGAAGGGAACCTCGACATCGAACTTTG  
GATCTGGTTGCACGAAGCCGCGGTACGGTTAGGATGGCATGATTCAGGTACTTATAACA  
AGGATATCCAAGATTGGCCTCAACGAGGTGGAGCTAATGGCAGTCTCCGCTTCGACGT  
TGAACCTAAACATGGAGCTAATGCTGGTCTTGTAATGCCTTGAAACTTATCCAGCCCA  
TTAAGAACAAGTATTCGGAGTCACTTATGCAGATCTATTCCAGTTGGCCAGTGCCACA  
GCAATCGAGGAGGCTGGTGGTCCTAAAATACCAATGAAGTATGGAAGAGTTGATGTAA  
CAGCACCCGATCAGTGCCCAGAAGAAGGAAGACTTCCTGATGCTGGACCCCCTTCACC  
TGCTCAACATCTACGTGACGTCTTCTACAGAATGGGTCTCAGTGACAAGGATATAGTTG  
CATTATCTGGAGCACATACATTGGGAAGATCGAGACCAGAACGCAGTGGCTGGGGAAA  
GCCAGAGACCAAATACACGAAAGATGGTCCAGGAGCACCTGGTGGACAGTCGTGGAC  
AGCGCAATGGTTGAAGTTTGATAATTCTTACTTCAAGGACATCAAAGAAAAGAAAGAT  
GAAGATTTGCTTGTCTTGCCAACTGATGCTGCTCTTTTCGATGACCCATCTTCAAGGT  
GTATGCTGAGAAATATGCAGCAGATCAGGAAGCGTTTTTCAAAGACTACGCTGAAGCA  
CACGCAAAGCTCAGTAACCTTGAGCCAAGTTCGACCCTCCTGAGGGTTTTCTCGTTGG  
ATGAACCTGCTCCAGAGAAGTTTGTGCGAGCAAATACTCGTCTGGCCAGAAAGAGTT  
GTCAGCTGCTATGAAGCAGAAGATTCGCGCAGAATATGAAGGCTTCGGTGGTAGCCCT  
GATAGACCTCTTCCAACAACTATTTTCTTAACATTATGATTGTTGTTGCTGTTTTAGCG  
GTTTTATCTTATTTTGCTGGAAACTAA

>HpAPX2

ATGGAGAACAAGTGTTATCCAAAAGTAAGTGAGGAGTATGAGAAAGCAGTTGACAAG  
TGTAAGAAGAAGCTTAGGGCTTTGATCCAACAGAAACATTGTGCCCTATCATTCTTCG



TTTGGCATGGCACGCAGCAGGGACATATGACGTGCACTCGAAAACAGGTGGACCGTTT  
GGAACGATAAAGAATCCACAAGAACTTTCTCATGAAGCTAATAACGGTCTTGATATCGC  
TGTTCTGACTGCTCGAGCCAATCAAAGAGCAATTCCCCATTTTAAGCTATGCTGATTTTA  
TCAGCTGGCTGGTGTGTTGTTGCAGTAGAAGTCACTGGAGGACCTGAAATTCCTTTCCAC  
CCTGGCCGACCTGACAAAGCTGAATCGCCCCAAAAGGCCGATTACCTGATGCCAAGA  
AAGGTTCTGAGCATTGAGGGAAGTATTCCATCGCATGGGTCTATCCGATAAGGACATA  
GTCGCTCTTTCGGGTGCTCACACCTTGATTGTGAGTTGTTTAACTGAAAGATTCAAGGG  
ATATGACTTGGATACAATCCTCTACAGCAAAGCACAAGAGAAAAAGGATTCAAGACTG  
GTTTTAGAGACAGTTTCAAGTGCTACAGCAAGGCACAAACACCCTAGACTAACCTCAA  
CAGCAAGGCCAGCTTAG

>HpAPX1

ATGGCAAAGAAGCTACCCAACTGTGAGCGAGGACTACCAAAAAGGCCATTGAGAAGGCA  
AAGAAGAAGCTCAGAGGTCTTATCGCTGAGAAGAAATGTGCTCCACTCATGCTTCGTA  
TTGCATGGCATTCCGCTGGTACCTTTGATTGCGCATCAAAGACCGGAGGACCTTTCGGA  
ACAATGAGGTTCAAGGAAGAGCTGGGTACGGAGCCAACAACGGGGTTGACATTGCT  
GTCAGGTTGTTGGAGCCTATCAAGGAACAATTCCCCACCATCACTTACGCCGACTTTTA  
TCAGTTGGCTGGTGTGTTGGCTGTTGAAATTACTGGAGGACCTGAAGTTCCCTTCCAC  
CCTGGCCGAGAGGACAAGCCAGAGCCTCCACAGGAGGGTTCGTCTCCCTGATGCTACA  
AAGGGTTGTGACCATCTGAGAGACGTGTTTCGTCAAGCAAATGGGTCTTTCTGACCAAG  
ACATTGTTGCTCTCTCTGGAGGCCACACCTTGGGAAGGTGCCACAAGGAGCGTTCGGG  
CTTTGAAGGAGCTTGGACCGCTAACCCTCTGATCTTTGACAACACCTACTTCACGGAG  
CTTTTGAGCGGTGAGAAGGAAGGTCTCCTGCAACTACCATCTGACAAGGCTCTTCTGG  
CAGACCCTGTCTTTCGTCTCTCGTTGAGAAATACGCAGCGGATGAAGATGCATTCTTT  
GCCGACTATGCTGAGGCTCACATGAAGCTGTCCGAGCTTGGGTCTGTTTCATATTGA

>HpAPX1a

ATGATGGCTAAGAAGCTACCCAACTGTGAGCGAGGACTACCAGAAGGCTATTGAAAAGG  
CAAAGAAGAAGCTCAGGGGTCTTATCGCCGAGAAGCAATGTGCTCCGCTCATGCTTCG  
TATTGCATGGCACTCTGCTGGTACCTTTGATGTGCAGTCAAAGACGGGAGGACCCTTTG  
GTACTATGAGGCACAAGGATGAGTTGGCTCATGGAGCTAACAACGGGCTTGACATTGC  
TGTCAGGTTGTTGGAGCCCATCAAGGAACAGTTTCCCACCATCTCTTATGCTGACTTCT  
ATCAGTTGGCTGGTGTGTTGGCTGTTGAAGTTACTGGAGGACCAGAAGTTCCCTTCCA  
CCCTGGTCGAGAGGATAAGCCAGAGCCCCCACAAGAAGGCCGTCTCCCTGACGCCAC  
CAAGGGTTGTGACCACCTGAGAGATGTGTTTGTAAAGCAAATGGGTCTTACTGACCAA  
GATATTGTTGCTCTCTCTGGAGGCCACACCTTGGGAAGGTGCCACAAGGAGCGTTCTG  
GTTTTGAGGGAGCTTGGACTTCCAACCCTCTCATTTTCGACAACCTCGTACTTCAAGGA  
GCTTTTGAGTGGTGAGAAGGAAGGTCTCTTGCACTGCCATCAGACAAGGCTCTTCTG  
TCAGACCCTGTCTTCCGTCTCTGGTTGCGAAATATGCAGCGGATGAAGATGCATTCTT  
TGTCGACTATGCTGTTGCTCACATGAAGCTGTCAGAACTTGGGTTTGCTGATGCTTAA

>HpAPX9

ATGACAACTCGAAAAGGGCAGGTGAACGATGCAGAATACTTGAAAGAAATCGATTGG  
GCTCGTCGAGACCTTCGTGCATTAATATTTACCAAGCAATGTGCTCCTTTCATGCTGCGC  
CTAGCATGGCATGATGCAGGCACATACGATGTGAAAACAAAGACTGGCGGTCCAAATG  
GTTCAATTAGGTACGAGTTGAGCCATGGTGCAAATAGAGGACTCAAAGTTGCCATTGAT  
TTCTGTGAAGAAATAAAGGCTAAATACCCCAAGATCACTTATGCTGACCTTTACCAGCT

TGCAGGAGTCGTCGCTGTGGAAGTCTCAGTTGGTCCAACCATCGACTTTGTTCCAGGT  
CGAATGGATTGCCCCGGGTCTACTGATGAAGGCCGTCTTCCTGATGCTAATGGAGGTGG  
CGAACATTTGAGAGAGATTTTTTATCGCATGGGACTTTCCGACAAGGACATCGTTGCAC  
TGTCTGGAGCACATACATTGGGTAGAGCACATGTAGAGAGATCAGGTTTCGAAGGCGC  
TTGGACACCAGAGCCTCTCAAATTTGATAACTCCTACTTTGTTGAATTGCTGAAAGGAG  
GAAAATCAGGGATGTTGAAACTACCTACAGACAAAGTTCTTGTACAAGATCCGGTGTT  
CCTTCCCTATGTTGAACTTTATGCCAAGGACGAAGAAGTCTTCTTCAGAGATTATGCAG  
ATTCTCACAAGAACTGTCAGAGTTGGGATTTGCACCACCCAACCTCTCGCCCAAATAT  
GGTTACGAAGGTTGTGGTTGGCATCGCTGTTGCTATTACCGTTGCTGTCATCAGCTACT  
TTTATGAAGTTTGTAAGCAAGCTAAGTAA

>HpAPX3a

ATGGCGATGCCAGTAGTTGACACTGAATACCTCAAACAAATCGACAAAGCTCGTCGTG  
ATCTCCGTGCTCTCATCTCTAATCGCAATTGCGCTCCTCTCATGCTTCGCCTCGCGTG  
ATGATGCAGGAACGTATGATGCGAAGACGAAGACAGGTGGACCGAACGGTTCGATTA  
GGAATGAGGAAGAGTTTGCTCATGGTGCTAATAACGGTCTCAAGAAAGCTATTGATTG  
GTGTGAGGAGGTGAAGGCTAAATATCCAAAGATCACGTATGCCGACTTGTATCAGCTTG  
CTGGTGTTGTTGCAGTTGAAGTCACAGGAGGCCCTACAGTTGATTTTGTTCCTGGTAG  
AAAGGACTCCAAGGTATCTCCAGAGAAGGGCGACTTCCAGATGCCAAACAAGGTGC  
ACCACATCTGAAGGACATATTTTATCGGATGGGTCTCAGTGATAAAGACATTGTAGCCT  
TGTCAGGTGGACACACCCTGGGAAGGGCACATCCAGAGAGATCAGGTTTTGACGGCC  
CATGGACCCAAGAGCCCCTCAAGTTTGACAACCTCATATTTTGTAGAACTGATGAAAGG  
AGAATCAGAGGGACTGTTGCAGCTTCCGACTGATAAAGCTCTGTTAGATGATCCTGCAT  
TTCGCCCTTATGTTGAACTCTATGCTAAGGATGAGGAGGCTTTCTTCCGCGACTATGCT  
GCTTCGCACAAGAACTTTCTGAACTGGGGTTTACTCCTGGCGGGTCCAAGTCAGGGC  
CAAAGGACAGCATTATACTGGCCCAAAGTGCGGTTCGGGGTTGCAGTTGCTGCAGCCGT  
GGTCATCCTGAGCTATATCTATGAAGTTCGCAAGAGAGTATAG

>HpAPX3

ATGGCGATGCCAGTAGTTGACACTGAATACCTCAAACAAATCGACAAAGCTCGTCGTG  
ATCTCCGTGCTCTCATCTCTAATCGCAATTGCGCTCCTCTCATGCTTCGCCTCGCGTG  
ATGATGCAGGAACGTATGATGCGAAGACGAAGACAGGTGGACCGAACGGTTCGATTA  
GGAATGAGGAAGAGTTTGCTCATGGTGCTAATAACGGTCTCAAGAAAGCTATTGATTG  
GTGTGAGGAGGTGAAAGCTAAATATCCAAAGATCACGTATGCCGACTTGTATCAGCTTG  
CTGGTGTTGTTGCAGTTGAAGTCACAGGAGGCCCTACAGTTGATTTTGTTCCTGGTAG  
AAAGGACTCCAAGGTATCTCCAGAGAAGGGCGACTTCCAGATGCCAAACAAGGTGC  
ACCACATCTGAAGGACATATTTTATCGGATGGGTCTCAGTGATAAAGACATTGTAGCCT  
TGTCAGGTGGACACACCCTGGGAAGGGCACATCCAGAGAGATCAGGTTTTGACGGCC  
CATGGACCCAAGAGCCCCTCAAGTTTGACAACCTCATATTTTGTAGAACTGATGAAAGG  
AGAATCAGAGGGACTGTTGCAGCTTCCGACTGATAAAGCTCTGTTAGATGATCCTGCAT  
TTCGCTCTTATGTTGAACTCTATGCTAAGGATGAGGAGGCTTTCTTCCGCGACTATGCTG  
CTTCGCACAAGAACTTTCTGAACTGGGGTTTACTCCTGGCGGGTCCAAGTCAGGGCC  
AAAGGACAGCATTATACTGGCCCAAAGTGCGGTTCGGGGTTGCAGTTGCTGCAGCCGTG  
GTCATCCTGAGCTATATCTATGAAGTTCGCAAGAGAGTATAG

>HpAPX10b

ATGGCACAAATGACAAGATGTGTGCAAATGGTGGATACTGAATATCTGAGACAGATTG

AAGAAGCTCGTACAGACCTTCACAATCTATTATCCCTTAATAAGCAATTTGCTCCTACTA  
TTCTTCGCTTAGCATTTCATGATGCAGGAACGTATGATGCGAAAACAAACACCGGTGGT  
ACAAACGGGTCAGTTAGGAATGAAATGAGCACCGCGCCTAACGTTGGCATGCAAGCA  
GCTCTTGATTTCTGCGAGCAAGTGAAAGTGAGGCACTCCAAGGTCACTTATGCCGATC  
TTTACCAGCTTGCCGGAGTTGTTGCAGTAGAGGTGACTGGTGGTCCGAAAATACACTT  
CGCCCCTGGTCGGAAGGATGCCCCGCCGCAGCAAGACAAAGGAAATCTTCCGAAACC  
TAACGGAGATAGCAAGCATTTGAGAGACATATTTACAGGATGGGGCTCTCTGATAAG  
GATATTGTGGTACTATCTGGGGCTCACACACTGGGTGCGGCACATCAGGATAGATCAGG  
CTTTGATGGTCCTTTACCAGAGACCCGCTCACATTCGACAATTCCTATTATGTGTTGTT  
GATGAAGGGCGACACTGCAGGGGCTCGTCAAATTTCCCACTGACAACCTCTCTCATGCAA  
GATCCTACATTCCGTGTCTATGTTCAAATTTATGCTAGGGATCAGAATCTGTTCTTCAAA  
GATTATGCAGAGTCACACAAAAAGATGTCAGAGCTTGGATTTACCCACATAAACATG  
CCTCTCACCCGGACCCACACCCACACCCAACCTCACACTCGCATGAGGTACCCACCA  
CAACCAGAACCACAGCCACAACCACAACCAAAAACCACCACGCTCAGCCAC  
AGCAACTCCCTCAGTGCCGTCCACGCCCACCTTGTGGATACTTTTGA

>HpAPX10

ATGAGCTGCAATAGTCGTGAGGTCCGTCCTAACAATCGTGAAGACCGTGATATGCAGAT  
AGCCAAACAATTGTTATATTCTCAATTTCTTACAAAATTTGTTTGAAAAAGAAGCAAC  
GACAATGGCCTCTTAGAAAAAAGGGTTTAAGATTGGAAGGTTGCTTCACGTGCCACC  
GAGTTGCGGAGAGCTTTATTTTATGAGAATTATGTTGAATCACATTAAGGGTCTCAAAA  
GTTTCGAGCACATCAGGACTGTCAATCATGATATTGTTTCGTCGGACCTATAGAGATGCAT  
GTTACGCACTTGGCTTAATTGGCGACGACAAAGAATATATTGATGTGATCGAAGAAGCA  
AGTGATTGGGGATCTGGATCTTATCTTCGACATTTGTTTTCGACTTTACTATTGTCTTGTA  
CTTTGTCTATGCCAAGCAGAGTGTGGGACAAAACCTTGGCGTCTATTATCTTACAACATC  
CTTCATAGGCAGCGTAGAATCCTTAACAATCAAGGTCTACAACCTAACAGACGAGGAGT  
TACAAAATTACACATTGCTCGATATCGAAAATTTCTACAGATAAATGGAAGTAGCCTAC  
ATAGATTTGAAGGGATGCCCCTACCAGATATATCGGCAACGTCTCATCATCGAAACAAC  
TTAGTAATGGATGAGTTGTCTTATGATAGACAGTCATTGCGTGAAGAACATGATAATAAC  
TTAGCTATAATGACAGATGAACAGAGGTTGGTCTATAATGAAATTGTAGACGCTGTTTTA  
AAGAATAAAGGAGGGGTGTTCTTTGTATATGGGTATGGCGGAACTGGGAAGACTTTCA  
TTTGCGCAACTTTGTGTGCTGCTTTTAGATGTAAGGGTGGTATTGTTTTACCAGTGGCAT  
CAAGTGGAATTGCAGCAACCTTGATTCTTGGTGATAGAACGGCTCATTCTAGGTTTGGA  
ATACCGCTTAGTGTGACCGAAAACCTCCACTTGCCCTCGCATTAACCCGGAAGTGATT  
AACAGAACTTATGAGAATGACAAAACCTCATAATATGGGACGAAGCGCCAATGACTCAT  
AAACACAGCTTTGAGGCTCTGGATCGAAGCCTAAAAGATGTAATGCGTGTTGTAGACG  
AGAGAAATGCAGACGAACCTTTTGGCGGAAAAGTGGTAGTCTTCGGGGGGGATTTTC  
GTCAAATTCTACCAGTCGTGCCTAAAGGAATCAGAGCAGATATTGTGCATGCTTCTCTT  
TGTTTCATCTTATTTATGGTCTTCATGCAAGGTTCTTAAATTGACCAAAAACATGCGTTTG  
CAAGTTGGAAGTTCAAGCAACAATGGCGATGACATAAAGAAATTTTCTGAGTGGATCT  
TGGAATTTGGAGATGGCTTAGCTGGTGGTGATAATACTGGGGAAGTGGAGCTTCAATTT  
CCGCTCGACCTACTCATTGAAGACGAAAGGGCAATCCTTGACCAACTCACGAGATTG  
TTGATGAGGTAAACGATTATGTTTTATCGCTTATTGACAAGGATGAAAGAATATATCTAA  
GCTCTGATGAAGTTAGCAAAGACGACACCTCTATTGGTGAGCGTGATCTACATTCCACT  
GAATTTCTTAATAGTATTAAATGCTCCGGTCTCCCTAATCATCAGTTGCGTTTGAAGATT

GGTGCTATGGTAATGCTTCTTAGGAACATTGACCAATCACGCGGGTTATGTAATGGCAC  
GAGATTGATTGTGACAGCTTTGGGAACGCGTGTTATTAGGTGTACGGTTTTAACTGGTA  
GTCGGAAGGTACATTTGATGCGAAAAAGAACACAGGGGGTGCAAATGGTACAGTTA  
GGTTGGAATTAAGCAGCCCCCTAACAGGGGCATCAAATTCGCTGTTGATGTTTGTGA  
ACAAGTCAAGGTAAACACCCCCGAATTACCTATGCTGACCTTTTCCAGCTTGCCGGA  
GTAGTTGCAGTTGAAGCTACAGGCGGACCTATCATCCAATATTCTCCAGGCCGACCTGA  
CTCCCCGAAAAAGACAGTACCGGAAATCTTCCAAACCCTAATGGAGATGCTCGGCAT  
TTGAGAGATGTACTCGGCAAAATGGGATTTTCAGATAGGGAAATCGTAGCACTTTACG  
GATCTCATACTTTGGGTCGAGCACATCAAGATAGATCGGGTTTTGACGGTCCTTTTACC  
AAAGAACCATTGAAATTTGACAATTCCTACTATGTAGAGTTGTTGCAAGGTGATACCCC  
AGGACTAGTGAAGTTCCCCACAGACAAAGTTCTTATTCAGGATCCCGTGTTTCGTCAAT  
TTGTTCACTCTATGCTCAGGATGAAAAGAAATCTTTGAAGATTATGCAGAAGCGCAC  
AAGAAGATGTCAGAGCTTGGAGTATTCCCACCTTCTGTGGTTGAAGATTGGATGCAA  
GACTCGGGCGAGTGGGAGGAGGAGGAGGTGGTGGAGGCGGCGCAACAGGAGTGGCG  
GGGGAAGAGACAGAAACAGAGGAGGAATGA

>HpAPX10a

ATGGCAAAGGTTGATGCAGACTATTTGAAACAAATCGAGGCTGCTCGCAACGAGCTTC  
GCAACATTATCCGCTCCCCAAAATTGTGCTCCATTATGCTCCGCTTAGCATTTCATGATG  
CAGGGACATTTGATGCGAAAACAAAGACAGGAGGTCCAAATGGTACAATCAGGTTGG  
AGTTAAGCAGCCCTCCAAACAATGGCATCAAAGTTGCTGTTGATCTTTGTGAACCAGT  
GAAGGCTAAACACCCCCAAAATTACCTATGCTGACATTTATCAGGACGCCCCGCAACAA  
GACAGTACTGCCGGTCTTCCAAATCCTGGTGGAGATGCTGAACATTTAAGAGATGTATT  
CCATAGAATGGGTCTTTCTGACAGGGATATTGTGCGCACTTTCGGGTTCTCACACATTGG  
GTAGAGCACATCAGGATAGATCAGGCTTCGACGGTCCGTTTACCCAGAGCCTCTGAA  
ATTTGACAATTCATACTATGTAGAGCTAAGGAAAGGTGAATCACCCGGATTGGTGAAAT  
TTCCTAGTGACAAGGTTTTGACTCAAGATCCAGTCTTCCGCAAATATGTTTCAGATTTATG  
CTCAGGACGAGAAGACATTTTTTTGCGCATTATGCAGAATCTCACAAGAAGATGTCTGA  
GCTTGGATTCCGCCCACCAGTCAAGGCTTAA

>HpCAT1

ATGGATCCCTACAAGTTTCGTCCGTCAAGTGCACACAATTCTCCATTTTGGACTACTAAT  
TCTGGTGCTCCTGTTTATAACAACAATTCCTCGTTGACCGTTGGTAACAGAGGTCCCAT  
TCTTTTGGAGGATTATCATCTAGTGGAGAACTTGCCAACTTTGATAGGGAGCGTATTC  
CAGAACGCGTTGTTTCATGCCAGGGGAGCGAGTGCTAAGGGATTTTTTGAAGTCACCCA  
TAATGTTTTCTCACCTTACATGTGCTGATTTTCTACGTTCCCCTGGGGTCCAGACGCCTGT  
TATTGTTTCGCTTCTCCACTGTTATTTCATGAACGTGGGAGTCCTGAAACACTGAGGGACC  
CCCGTGGTTTTGCTGTGAAGTTTTACACCAGAGAGGGTAATTTTGATATGGTAGGGAAC  
AATTTCCCTGTGTTTTTCATCCGTGACGGCATGAAGTTTCCTGATATGGTGCATGCGTTG  
AAACCCAACCCCAAATCTCACATCCAAGAAAACCTGGAGGATCCTTGATTCTTCTCTC  
ACCACCCTGAGAGTTTACACATGTTTACTTTTCTCTTTGATGATATTGGAATTCCTACCG  
ACTATAGGCACATGGAAGGGGCTGGTGTCAACACTTACATGCTGATTAACAAGGCTGG  
GAAAGCTCAATATGTCAAGTTTCATTGGAACCAACTTGTGGAGTGAAATCTTTGTTGG  
AAGATGAGGCCATAAAAGTTGGTGGGGCCAACCATAGTCATGCAACTCAGGACCTCTA  
TGATTCAATCGCTGCCGGGAATTATCCCGAATGGAAATTGTTTCATCCAAACAATTGACC  
CGTTTGATGAAGATAAGTTTGACTTTGACCCACTAGATGTTACCAAGACATGGCCCCGA

GGACATTTTGCCTCTACAGCCTGTTGGACGCCTAGTTTTGAACAAGAACATTGACAAC  
TTTTTTGCGGAAAATGAGCAGCTGGCATTTTGCCCTGCACTAGTTGTTTCCTGGTATCTA  
CTACTCAGATGACAAGCTACTCCAGACTCGAATTTTCTCATATGCCGATACCCAAAGAC  
ACCGTCTTGGAACCAACTACCTACAAATTCCTGTAAATGCACCAAAAAATGCTCATCAC  
AACAATCACTTTGATGGGTTCATGAACTTTATGCACAGGGATGAGGAGGTTGATTACTT  
CCCTTCTAGATATGATCCTGTTTCGTCATGCTGAGAAATATCCCATTCCATCAAATGTCTT  
GGGTGGTAGACGTGACAGGCAAGTCATTGTAAAGGAGAACAACCTTCAAGCAGCCTGG  
AGAGAGATACCGGTCTTTGAACCCGCCAGGCAAGAGAGATTTATCCAAAGATGGGT  
GAGGCGCTATCTGATCCTCGTATCACTCATGAGATTTCGCAGCATCTGGGTTCATACTGG  
TCACAGGCTGACAAATCGTTGGGCATGAAGCTAGCAAGTAGGCTTAATGTCAGGCCAA  
CCATGTGA

>HpCAT1b

ATGGTAGGGAACAATTTCCCTGTGTTTTTCATCCGTGACGGCATGAAGTTTCCTGATAT  
GGTGCATGCGTTGAAACCAACCCCAAATCTCACATCCAAGAAAATGGAGGATCCTT  
GATTTCTTCTCTCACCACCCAGAGAGTTTACACATGTTTACTTTTCTCTTTGATGATATT  
GGAATTCCTACCGACTATAGGCACATGGAAGGGGCTGGTGTCAACACTTACATGCTGAT  
TAACAAGGCTGGGAAAGCTCAATATGTCAAGTTTCATTGGAAACCAACTTGTGGAGTG  
AAATCTTTGTTGGAAGATGAGGCCATAAAAGTTGGTGGGGCCAACCATAGTCATGCAA  
CTCAGGACCTCTATGATTCAATCGCTGCCGGGAATTATCCCGAATGGAAATTGTTTCATCC  
AAACAATTGACCCGGTTGATGAAGATAAGTTTGACTTTGACCCACTAGATGTTACCAAG  
ACATGGCCCAGAGACATTTTGCCTCTACAGCCTGTTGGACGCCTAGTTTTGAACAAGA  
ACATTGACAACCTTTTTTGCAGGAAAATGAGCAGCTGGCATTTCCTGCACTAGTTGTT  
CCTGGTATCTACTACTCAGATGACAAGCTACTCCAGACTCGAATTTTCTCATATGCCGAT  
ACCCAAAGACACCGTCTTGGAACCAACTACCTACAAATTCCTGTAAATGCACCAAAAA  
ATGCTCATCACAACAATCACTTTGATGGGTTCATGAACTTTATGCACAGGGATGAGGAG  
GTTGATTACTTCCCTTCTAGATATGATCCTGTTTCGTCATGCTGAGAATTATCCCATTCCAT  
CAAATGTCTTGGGTGATAGACGTGACAGGCAAGTCATTGTAAAGGAGAACAACCTCAA  
GCAGCCTGGAGAGAGATACCGGTCTTTGAACCCGCCAGGCAAGAGAGATTTATCCAA  
AGATGGGTGAGGCGCTATCTGATCCTCGTATCACTCATGAGATTTCGCAGCATCTGGGT  
TTCATACTGGTCACAGGCTGACAAATCGTTGGGCATGAAGCTAGCAAGTAGGCTTAAT  
GTCAGGCCAACCATGTGA

>HpCAT2

ATGGATCCCTACAAGTATCGGCCATCAAGTGCTTACAACACTCCTTACTTAACAACAAA  
GACGGGTGAACCTGTTTATAATGACAACCTCTGCTTTGACTGTTGGTCCTCGAGGGCCA  
ATTCTGTTGGAAGATTACCATCTGATAGAAAAGATAACGACATGGACTCACGAGCGTAT  
TCCGGAGCGAGTGGTACACGCAAGGGGAGCCAGTGCAAAGGGTTTCTTTGAAGTCAC  
TCATGACATTACTCATCTTACTTGTGCTGATTTCTTCGTGCTCCCGGTGTTCAAACCTCC  
TGTCATTGTTGTTTTTCGACTGTCAATTCATGAGCGTGGCAGCCCTGAAACAATCCGTG  
ACCCTCGTGGTTTTTGCCACCAAGTTCTATACCCGTGAGGGTAACTTCGATTTGGTAGGG  
AACAATTTCCCAGTATTCTTCAACCCGTGATGCAATGCAGTTCTTTGATTTGATCCGGGCC  
TTCAAGCCAAACCCGAAATCCCACATCCAAGAGGACTGGAGGTTCTTGGACCACTGCT  
CCTACCTCCCCGAGAGCCTCAACACCTTCACCTTCTTCTATGACGACATGGGTATCCCG  
ATCAACTACCGACACATGATTGGGTGAGGTGTCCACACCTTCACTATGTTGAACAAGG  
CAGGCAAGGTCACCTATGTCAAGTTCCACTGGAGGCCACATGTGGTGTCAAGAACAT

GCTTGAGGACGAAGCTGCTAAAGTCGCTGGAGAAAACCACAGTCACGCGACAAAAG  
ACCTTTACGACTCCATTGCCGCAGGAACTACCCTGAATGGAAGTTCTACATCCAAACC  
ATGGACCCGGCCGATGTGGATAAGTATGACTTCGACCCGTTGGATACCACCAAGACTTG  
GCCTGAGGATATTTTACCGCTGCAGCCCGTGGGACGCATGGTGTGGAACAAGAACATT  
GACAACTTTTTCAATGAAAATGAGATGCTTGCGTTTAACCCGGCTGCTATTGTTCCCTGG  
AATCCATTTCTCTGATGATAAGATGCTTCAGGCTCGGACTTTTGCTTATGCTGATACTCA  
GAGATATCGGCTTGCTCCTAATTTTCATGCAGCTTCCTGTTAATGCCCCGAAATGCCCTCA  
CCACAATAATCATAGAGACGGGCCTATGAACATGGTTTTTCAGGGATGAAGAGGTGGAC  
TACTTCCCATCAAGATTTGATCCCGTTCGTGAGGCTGAGAGATTCCCCATCCCAAATTT  
CGTAGTTCATGGAAGGCGCGAAAGGCAAATCATTCCGAAGGAGAACAACCTCAAGGA  
ACCCGGTGACAGATACAGATCATGGGACCCAGCCAGGCAAGAGAGGTTTATTGGGAG  
ATTCGTCAAGGCCCTGTCCGATCCTCGTCTAACTTATGAGATTTCGAGCATTTATGTTAA  
CTGGTTCACTCAGGCTGATAAATCTCTAGGCATGAAAGTGGCAAGCAGACTCAATGTG  
AGACCAACCATGTAA

>HpCAT1a

ATGGATCCCTACAAGTTTCGTCCGTCAAGTGCACACAATTCTCCATTTTGGACTACTAAT  
TCTGGTGCTCCTGTTTATAACAACAATTCTTCGTTGACTGTTGGTAACAGAGGTCCCAT  
TCTTTTGGAGGATTATCATCTAGTGGAGAACTTGCCAACTTTGATAGGGAGCGTATTC  
CAGAACGCGTTGTTTCATGCCAGGGGAGCGAGTGCTAAGGGATTTTTTGAAGTCACCCA  
TAATGTTTCTCACCTTACATGTGCTGATTTTCTACGTTCCCCTGGGGTCCAGACGCCTGT  
TATTGTTGCTTCTCCACTGTTATTTCATGAACGTGGGAGTCCTGAAACACTGAGGGACC  
CCCGTGGTTTCGCTGTGAAGTTTTACACCAGAGAGGGTAATTTTGATATGGTAGGGAAC  
AATTTCCCTGTGTTTTTCATCCGTGACGGCATGAAGTTTCCTGATATGGTGCATGCGTTG  
AAACCCAACCCCAAATCTCACATCCAAGAAAACCTGGAGGATCCTTGATTTCTTCTCTC  
ACCACCCAGAGAGTTTACACATGTTTACTTTTCTCTTTGATGATATTGGAATTCCTACCG  
ACTATAGGCACATGGAAGGGGCTGGTGTCAACACTTACATGCTGATTAACAAGGCTGG  
GAAAGCTCAATATGTCAAGTTTCATTGGAACCAACTTGTGGAGTGAAATCTTTGTTGG  
AAGATGAGGCCATAAAAGTTGGTGGGGCCAACCATAGTCATGCAACTCAGGACCTCTA  
TGATTCAATCGCTGCCGGGAATTATCCCGAATGGAAATTGTTTCATCCAAACAATTGACC  
CGTTTGATGAAGATAAGTTTGACTTTGACCCACTAGATGTTACCAAGACATGGCCCGA  
GGACATTTTGCCTCTACAGCCTGTTGGACGCCTAGTTTTGAACAAGAACATTGACAAC  
TTTTTTGCGGAAAATGAGCAGCTGGCATTTTGCCCTGCACTAGTTGTTTCTGGTATCTA  
CTACTCAGATGACAAGCTACTCCAGACTCGAATTTTCTCATATGCCGATACCCAAAGAC  
ACCGTCTTGACCCAACTACCTACAAATTCCTGTTAATGCACCAAAAAATGCTCATCAC  
AACAATCACTTTGATGGGTTTCATGAACTTTATGCACAGGGATGAGGAGGTTGATTACTT  
CCCTTCTAGATATGATCCTGTTTCGTTCATGCTGAGAAATATCCCATTCCATCAAATGTCTT  
GGGTGGTAGACGTGACAGGCAAGTCATTGTAAAGGAGAACAACCTCAAGCAGCCTGG  
AGAGAGATACCGTTCCTTTGAACCCGCCAGGCAAGAGAGATTTATCCAAAGATGGGTT  
GAGGCGCTATCTGATCCTCGTATCACTCATGAGATTTCGAGCATCTGGGTTTCATACTGG  
TCACAGGCTGACAAATCGTTGGGTATGAAGCTAGCAAGTAGGCTTAATGTCAGGCCAA  
CCATGTGA

>HpCAT2a

ATGTTTGGAGATTTAATTTTGGTGCAGTATCGGCCATCAAGTGCTTACAACACTCCTTAC  
TTAACAACAAAGACGGGTGAACCTGTTTATAATGACAACCTCTGCTTTGACTGTTGGTCC

TCGAGGGCCAATTCTGTTGGAAGATTACCATCTGATAGAAAAGATAACGACATGGACTC  
ACGAGCGTATTCCGGAGCGAGTGGTACACGCAAGGGGAGCCAGTGCAAAGGGTTTCT  
TTGAAGTCACTCATGACATTACTCATCTTACTTGTGCTGATTTCCTTCGTGCTCCCGGTG  
TTCAAACCTCCTGTCATTGTTCTGTTTTTCGACTGTCATTCATGAGCGTGGGAGCCCTGAA  
ACAATCCGTGACCCTCGTGGTTTTGCCACCAAGTTTTATACCCGTGAGGGTAACTTCGA  
TTTGGTAGGGAACAATTTCCCGGTATTCTTCACCCGAGATGCAATGCAGTTCTTTGATC  
TGATCCGGGCCTTCAAGCCAAACCCGAAATCCCACATCCAAGAGGACTGGAGGTTTCT  
GGACCATTGCTCCTACCTCCCCGAGAGCCTCAACACCTTCACCTTCTTCTACGACGACA  
TGGGTATCCCGATCAACTACCGACACATGATTGGGTGAGGTGTCCACACCTTCACTATG  
TTGAACAAGGCAGGCAAGGTCACCTATGTCAAGTTCCACTGGAGGCCCACATGTGGTG  
TCAAGAACATGCTTGAGGAGGAAGCTGCTAAAGTCGCTGGAGAAAACCACAGTCACG  
CGACAAAAGACCTTTACGATTCAATTGCCTCAGGAACTACCCTGAATGGAAGTTCTA  
CATCCAAACCATGGACCCGGCCGATGTGGATAAGTATGACTTCGACCCGTTGGATACCA  
CCAAGACTTGGCCTGAGGATATTTTACCCTGCAGCCCGTGGGACGCATGGTGTGAA  
CAAGAACATTGATAACTTTTTCAATGAAAATGAGATGCTTGCGTTTAACCCGGCTGCTA  
TTGTTCTTGGAAATCCATTTCTCTGATGATAAGATGCTTCAGGCTCGGACTTTTGCTTATG  
CTGATACTCAGAGATATCGGCTTGGTCCTAATTTTCATGCAGCTTCCTGTTAATGCCCCGA  
AATGCCCTCACCACAATGATCATAGAGACGGGCCTATGAACATGGTTTTTCAGGGATGAA  
GAGGTGGATTACTTCCCATCAAGATTTGATCCCGTTTCGTGAGGCTGAGAGATTCCCCAT  
CCCAAATTCGTAGTTCATGGAAGGCGCGAAAGGCCAAATCATTCCGAAGGAGAACAAC  
TTCAAGGAACCCGGTGACAGATACAGATCATGGGACCCAGCCAGGCAAGAGAGGTTT  
ATTGGGAGATTCGTCAAGGCCCTGTCCGATCCTCGTCTAACTTATGAGATTCGCAGCAT  
TTATGTAACTGGTTCACTCAGGCTGATAAATCTCTAGGCATGAAAGTGGCAAGCAGAC  
TCAATGTGAGACCAACCATGTAA

**CDS sequence of SOD, APX and CAT gene family members in *Beta vulgaris***

>BvCSD1

ATGGGCAAGGCTGTGGTTGTTCTAAACAGCAGTGAGGGTGTACTGGAACATATCTACT  
TCACCCAGGAAGGAGATGGTCCGACTACTGTAACCTGGAACATCTCGGGTCTTAAGCC  
TGGGCTCCATGGATTTTCATGTTTCATGCTCTTGGTGACACGACAAATGGCTGCATGTCAA  
CTGGACCACATTATAACCCTGCTGGGAAAGAGCATGGTGCTCCAGAAGACGAGGTTTCG  
CCATGCTGGTGATCTTGGGAATGTCACAGTTGGGGATGATGGTACTGCGACCTTTACAA  
TTATTGACAGCCAGATTCCTCTTTGTGGACCCAACTCAGTTGTGGGGAGGGCTGTTGTT  
GTCCATGCTGATCCTGATGATCTTGGAAAGGGGGGACATGAGCTCAGCAAGACCACAG  
GCAATGCTGGTGGAAGAGTGGCTTGTGGTGTTATTGGTCTTCAAGGTAA

>BvCSD3

ATGGGCACAACAGTGAAGGCAGTGGCTGTCATCGCCGTTCCAATAACGTCAAAGGCT  
CTCTCCATTTTCATCCAACATTCCACTGGGATAACACATGTCAAAGGAAAAATAACAGGA  
CTTACACCAGGTCTCCATGGCTTTTCATATCCATGCCCTTGGAGATACCACTAATGGTTGC  
AACTCCACTGGGCCTCATTTTAATCCGATGAAGAAGGACCATGGAGCTCCATCTGACA  
CGGAACGCCATGTGGGTGACCTGGGAAACATTGTTGCTGGCAGTGATGGGGTTGCTGA  
GGTCTCCATTAGTGATTCCCAGATATCACTTAGTGCGCAGCACTCAATACTTGGGAGGG  
CTGTTGTGGTGATGCTGATCCTGATGATCTTGGACGAGGTGGACATGAACTTAGCAAA  
GCAACTGGGAATGCTGGTGCTAGAGTAGGATGCGGTGTAATCGGGCTGCAATCATCCG  
TTTAG

>BvCSD2

ATGCAAGCAGCATTGGCAGCCATGACAGCGCACACCATTCTCGCTTCCCACCCTACATT  
ATCTCTTGTCTCTCCTTTTTCTCACCCTACTACAAGTACAATCTCAACTTCTCTTAACTC  
CTCTACCTCTTCCTTCAATGGCCTCTCTTTCAAGCTTTCCTCTCAAATAACAATCTCTCTC  
TGTGTCTAGTTCTGTGGCCCCCTAAACCCCTCACCATTGTTGCCGCCTCCAAAAAAGCTG  
TTGCTGTTCTTAAGGGCACTTCCAATGTTGAGGGTGTCGTCACCTTTAACCCAAGAAGAT  
GATGGACCAACTACAGTCAACGTTCTGATTACTGGACTTACTCCTGGGAAACATGGATT  
TCACTTGCATGAATTTGGAGATACAACAAATGGGTGTATTTCTACAGGGCCACATTTTA  
ATCCTAGTAGCATGACACATGGTGCTCCGGAGGATGAAATCCGGCATGCGGGTGACCT  
GGGAAACATTGTTGCTAACACAGATGGAGTGGCTGAGGCTACCATCATTGATAATCAG  
ATTCCGTTGAGTGGAGCAAATTCTGTTGTTGGTAGAGCCCTTGTGGTCCATGAACTTGA  
AGATGACCTTGGCAAGGGTGGACATGAACTGAGTCTGACTACTGGGAATGCTGGTGGC  
AGATTGGCTTGTGGTGTGTTGGTTTAACTCCTCTGTGA

>BvCSD4

ATGACGTTTCTAAGGTCAATAGCCACAACCACGACCGCCATAGCAGTCACAGCTCTAC  
CTGCATCTTACGTTGCATCTTCTCTCTCACTCCTCTTCTTCATCTTCATCTTCATCTTC  
TTCTCCATTCTCGAAATTTCTGGACTTCCATTTTCTCTCTCCTCGATCATCTTTGAGCTCC  
TGCGCAGGCAATAAATTAGGGCTACTCAAGAATTTGAGCTCACCGCCTTCTGCTGTTCA  
AATGGAAAATCCTAAATCTTCTTCTTATGAAAATATGATGTTGCCGGAATTAATGACAGA  
GTTTCATGGTGGATATGAAGTGTGAAGGCTGTGTAAGTGCTGTCAAGAGTAAACTTGAG  
ACTCTAGAAGGAGTTAAGAATGTTGAAGTGGACTTGAGCAACCAAGTTGTCAGAATTC  
TTGGTTCTTCACCCGTGATAACCATGGAAAATGCTTTGGAGCAAACCTGGTCGTAAAGC  
TCGACTGATTGGTCAAGGTGTACTTGAAGATTTCTTGTGTCCGCGGCAGTTGCAGAAT  
TTAAAGGCCTAGATATCTTTGGAGTGGTTCGCTTGGCCCAGACTCACATGGAGTTGGCT  
AGAATAGAGGCCAATTTTAGTGGTTTGCCACCAGGGAAACATGGATGGTCTATAAATGA  
GTTTGGTGATCTGACTAGAGGTCCAGTCAGCACGGGGAAGGTTTACAATCCACCAATC  
CAAGGAAGTGAAAATGAGCCATTGGGTGACCTGGGAACATTAGAGGTTGATGAGAAA  
GGTGAAGCATATTATACAGGAATCAAGAAAATGTAAAGGGTTGTTGATTAAATTGGACG  
GTCCATTGTCTTGTATGCATCGGAGGACAAATCCGATCCTGGTCTTGCAGCTGCCGTGA  
TCGCGAGGAGTGCAGGGGTAGGTGAGAACTATAAGAAGCTTTGCACATGCGATGGAA  
CCACAATTTGGGAGGCGAAGCCTGATTTTGTCACTACTCACTAG

>BvFSD1

ATGTTGTGTCCCTATAACTCTATAACCACGTTGGCACGTTTGGCTTTTATAAGAGTGTGTTT  
GGCACAACCAAACCTGCTATCTCCTCAAACACAAACACTGCTGACTGCTGTTTTTGTATA  
CTTCTATCAAAGAAATTATGTCTACTGTTGCTGCAACTTCCGCGATATCTTTGTCTTCAA  
ACTTTCTCTCATGAAGGATTTAAAGGGGAACCTCAATTCTATCTGTGTCTCACCATGG  
AGGAAACAAACAAGAGTAGGAAGAGCTGGTGCTGCTGTTGTTACAGCCAAATTTGATT  
TGAAGCCCCCACCTTATCCATTTGATGCCTTGGAGCCTCACATGAGCAAGCAAACCTTT  
GACTATCATTGGGGGAAGCATCATAGAGCCTATGTGGATAACTTGAACAAGCAAATAGT  
TGGAACAGAATTAGATGGATTGCCACTTGAAGAAGTAGTACGTATCACATATAACAAAG  
GAGATGTACTTCCTTCTTTTAATAATGCAGCACAGGCCTGGAACCATGAGTTCTTTTGG  
GAATCCATGAAGCCTAGTGGTGGGGGAAAGCCTTCCGCGAGCTTTTGGCGCAAATTG  
AAAAGGATTTTGGTTCTTTTGAAGCATTTGTTACTGAATTCAAGACTGCTGGGGCTACA  
CAGTTTGGTTCTGGCTGGGCTTGGCTTGTTTACAAAACAAATAAATTGGATGTTGGGAA



CGCAGTAAATCCGAAGCCATCTGAAGATGACAAGAAGCTTGCAGTTGTAAAGAGCCCA  
AATGCTGTGAACCCTCTCGTTTGGGACTATTATCCACTTCTTACTGTTCGATGTTTGGGAG  
CATGCTTATTACTTGGACTTCCAGAACCGAAGGCCTGATTATATCTCAATTTTCATGGAA  
AATCTTGTTCCTGGGATGCTGTTCAGTGTAAGATATGAGGCAGCCAAGGCTGTTGCTGC  
TGACAGGGAGAAAGAAACAGCACAGAATTAA

>BvMSD1

ATGGCGCTTCGAGTTTTGATGACAAGAAAAACCCTAGCTTCTGCAAAGCAAGGCCTTC  
TTCAATGTCGATCATTGCAGACTTTCTCTCTCCCTGACCTTCCTTACGACTATGGTGCTC  
TTCAGCCCGCCATTAGCGGCGAAATCATGCAGATTCATCATCAGAAACATCACCAGACT  
TACATCACTAATTACAATAAAGCTCTTGAACAACCTCGATGATGCTATTGCTAAAGGCGA  
CGCTTCTTCTGTCGTTAAGCTTCAAAGCGCCATTAAATTCAATGGCGGAGGTCATGTGA  
ATCACTCAATTTTCTGGAAGAACCTTGCTCCAATTAATGAAGGAGGTGGTGAGCCTCC  
AAAATCTTCACTGGGTTGGGCTATTGATTCAAACCTTGGTTCTCTGGAAGCTCTTATTC  
AGAAAATGAATGCAGAAGGAGCTGCTGTACAGGGTTCTGGGTGGGTGTGGCTTGGAC  
TCGACACGCAATCAAAAAAGCTTGTGGTTCGAAACCACGCCAAATCAGGACCCACTCG  
TAACTAAAGGACCAAGCTTGGTTCCTATACTTGGTATAGATGTATGGGAGCATGCGTAC  
TACCTTCAGTACAAGAATGTGAGACCTGATTATCTGAAGAACATCTGGAAGGTTATAAA  
CTGGAATATGCAAGCGAGGTGTATGAAAAAGAGGTCCCCAGCCACTGA

>BvFSD2

ATGGGAAGTTTTAGTGCCATAATTTCTGTTAGCTCACCTCTTCATGCAAATGAATTGTTT  
CCCAAGATTAAAAATTTAACCTTTTATAATCAGCAGAAAAAGAAGAAATCAAGGACTGA  
AAAGAAGGCCTGGAGTTGTTGCATACTATGGGCTGAAAGAGCCTCCCTATAACCTTGAT  
GCTCTAGAACCATATATGAGCCAAAAAACACTGGAGTCGCATTGGGGAGAGTATCATA  
GAGGTTACTTGGAATAATTTGAATAGACATTTGAGTAGGAGTGACATACTATATGGCTATA  
CTATGGATGACCTTGTGAAAGTAACATACAATTATGGAAACCCCTTACCTGAATTCAAC  
GATGCTGCACAGGTCTGGAATCACGACTTCTTTTGGGAATCCATGCAACCTGGAGGTG  
GGGAGTCTCCAACGCTTGGTCTTCTTCAGCAGATTGAAAAGGATTTTGGTTCTTTTACA  
GACTTCAAAGAGAAGTTCATAGAGGCAGCCATGACACACTTTGGTTCTGGCTGGGTTT  
GGCTGGTTTTGAAGAGGAAGGAGAAGCAGCTTGCAGTGGTGAAGACCTCGAATGCAG  
TAACTCCTATCGTTTGGGATGATATCCCAATCATATGCCTGGATTTGTGGGAGCATGCCT  
ACTACTTGGATTATAAGAATGATAGAGCGAAGTATGTTAATGTTTTTCATGAACCACCTTG  
TATCATGGCATTTCGGCAACAGCACGCCTTGCTCGAGCACAGGCTTTTGTGAATCTTGGA  
GAACCTAAAATTCCAGTCGCTTGA

>BvAPX9

ATGGTGAATGCAGGATACTTGAAGGAAATAGAGAGAGCTCGTAGAGACCTTCGCGCTC  
TCATCTCTGCCAAGCAATGTGCTCCTATCATGCTTCGTTTAGCATGGCACGATGCAGGTA  
CATATGATGCAAAGACGAATTCAGGGGGTCCGAATGGCTCAATTAGGAACGAGCACGA  
GTTGAGGCACAATGCCAACAATGGCCTCAAAATCGCGGTTGATCTTTGTGAAGAAGTT  
AAGGCTAAGCACCTCAGATTACTTATGCAGACCTTTATCAGCTTGCTGGAGTTGTTGC  
TGTGGAAGTCACAGGCGGGCCAACGATTAACTTCGTTCCAGGTCGAGTGGATTCTCA  
GTTTCTCCAGATGAAGGACGTCTTCCAGATGCAAATCAAGGTGCTAGGCATTGCGAG  
ATATATTTCATAGAATGGGGCTCTCTGACAAAGATATTGTGGCACTGTCAGGAGGCCAC  
ACACTGGGTAAAGCACATAAGGACAGATCAGGTTTTGAAGGCCCTTGGACCAGCAATC  
CATTGAAGTTCGACAATTCATATTTGTAGAGTTGCTGAAAGGTGAACAATGGGGGTTA

TTGAAACTTCCCACTGATAAGGTTCTTACACAGGATCCTCACTTTCGTCCCTATGTTTCAT  
CTCTATGCTAAGGATGAAGACGCGTTCTTCAAAGACTATGCAGAATCGCACAGAAGC  
TATCAGAGTTGGGGCTTACTCGATCCTCTTCTTTGAAGATGACTAAGGCTACTATTGGA  
GTTCTTGTCACTCTTACCGTAATTATCTTAAGCTACTTGTATGATTTAAATAACAAGCAT  
AA

>BvAPX10

ATGGCACAAGCACAGTTGCACATTGTGGATGCTGAATATTTGAAACAAATTGAAGGGG  
CTTGTAAGAGATTTCGCAACCTGCTACAGAACAACAAGCAATTTGCTCCCATCGTGCT  
TCGCTTAGCATTTTCATGATGCAGGAACCTTATGATGCCAAAGCCAAGACTGGAGGTCCA  
AATGGTTCCATCAGGAATGAGTTGAGCAACCCTGCCAACAATGGTATCAAAACCGCTA  
TTGATTTTTGCGAGCCAGTGAAGGCTAAATATCCTAAGGTTACTTACGCTGACCTTTATC  
AGCTTGCTGGTGTAGTTGCAGTTGAAGTTACTGGAGGGCCTATTATCCCCTTTGTTGCG  
GGTAGACCAGATGCCCCGGATCAACAAGACAGTGGAGCTCTGCCAAATCCCAATGGA  
GATCTCAAGCATGTGAGAGACATTTTCTATCGAATGGGCTTGAACGATAGGGATATCGT  
AGTTCTATCAGGGGCTCACACACTGGGTCGAGCACACAAGGATAGATCAGGCTTTGAT  
GGTCTCTCAGCAAAGATCCATTGAAGTTTGACAATTCCTACTTTGTGCAATTGAGGAT  
GGGTGATACTCCTGGACTGGTGAAATTCCCAACAGACAAAGCTCTTTTGGAGGACCCT  
ATTTTGCCTCGCTATGTTCAAATTTATGCCAAGGATGAAAAGGTATTTTTCGCACATTAT  
GCTCAATCACACAAGAAGATGTCTGAGCTCGGGTTTCACCCACCTCGTTGTCCTAAGA  
ACGCTTGA

>BvAPX2

ATGGGGAAGAGTTACCCAAGTGTTAGCAAGGAATACAAGGAAGCAGTAGACAAATGT  
AAAAGAAAGCTTAGAGCTCTCATCCAAGAGAAGCACTGTGCTCCCATCATTCTTCGTT  
TGGCATGGCACGCAGCTGGGACATTTGACGTTTCAGTCAAAAACGGGTGGTCCATTTGG  
GACAATAAAGAACCCACAGGAGCTGGCACATGTTGCAAATAATGGCTTGGATATTGCT  
GTTAGACTACTGGAACCAATCAAAGAGCAGTTCCCAATCCTAAGCTATGCTGACTTCTA  
TCAGTTGGCTGGAGTGGTTGCAGTAGAAATTACAGGGGGGCCTGAGATCTTGTTTCAC  
CCTGGAAGACCTGATAAACTGAATCGCCGCCAGAGGGTCGCTTACCTGATGCGAAGA  
AAGGTTCTGACCATTTGAGGGAAGTATTTTACCGTATGGGTTTGTCTGACAAGGATATT  
GTTGCTCTATCTGGTGCTCATACCTTGGGAATGTGTCATAAGGAGAGATCGGGCTATCA  
GGGAGCTTGGACTAACAATCCTTTGATCTTCGATAACTCGTATTTTCAGAGAGCTTCTTA  
CGGGAGATAAAGAAGGTTTCATTCAGCTGCCATCGGACAAAGCACTCCTTGAGGATGT  
AGCATTTTCGTCCCTATGTTGAAAAATATGCACAGGACGAGGAAGCTTTTTTTCGGGATT  
ATGCTGAAGCACATTTGAAGCTTTCTGAGCTTGGATTGTCAGACGAGGTATGA

>BvAPX6

ATGACGACGGTCGGCGGCGAATCTTCCATTTACGCTGCTGTTTTGCCACCCAATCATC  
ATCTTCTCCCCTCAACAACCTCAAATTTCCCGCCAAATCTTCTCCGTCAACTGTCCAATT  
TGGCGCCAAAGCTTCTCCATTTCTCACTCCTACTTTTGCACCTCCACCCATTTTCAGATGA  
ATGTAGCAATGTCAACTCGCGTGGTAGAAGAGGACTCATTTTCCTTTCTGCCACTCTTC  
CTTTTCTTTTTCCTTTGCGAGATTTTGTGCGATGATCTCATTGTTGAAGCAGAAGAGCTGG  
GAGCTCCTGATTACCTACTTATAAAGGATGAGATAAGGAAGGTTTTGACAAAAGGAAA  
GGCAGCTGGTGTACTTCGTCTTGTGTTTCATGATGCAGGAACTTTTGAGCTCAGTGAGA  
ACTCAGGAGGTATGAATGGCTCCATAACATATGAACTCGAGAGGCCTGAGAATAAAGG  
GCTCAAAAAATCTCTCAAGATTGTTGAAAAAGCGAAAAATGTGGTGGATGAAAGACT

GTCAGTGTCATGGGCAGACATGATAGCTGTAGCAGGAGCTGAGGCAGTCTCGATTTGT  
GGAGGTCCAGAGATCCCTCTTCGGTTGGGGAGACTTGATTTGCCGAATCCTGATCCTG  
AAGGGAAACTACCTGAAGAATCACTGGATGCGCTAAGGTTGAAGCAGTGCTTTCAA  
GAAAAGGCTTTTCGACACAAGAACTTGTTGCACCTTCTGGGGCTCATACTCTTGGAAG  
TAAAGGTTTTGGAAGCCCTGTTGTATTTGACAATTCATATTACAAAATACTCCTTGAGAA  
ATCTTGATGTCATCAGGTCAGCCAGCTGGAATGTCAAGTATGGTTGGACTTCCTTCTG  
ATCGTGCACTAGTCGAGGATGATGAATGTTAAGATGGATTACAGATTACGCGAACGAC  
CAGGATAAGTTTTTTGAGGATTTTAAGAATGTTTACATCAAGTTAGTCAATTCAGGTGC  
AAGGTGGAAGCTTTATGA

>BvAPX1

ATGGGAAAGAGCTACCCAAGTGTGAGCGAGGATTACCAGAAAGTCAATCGAGAAGGCC  
AAGAGAAAGCTCAGGGGTTTAATTGCGGAGAAGCATTGTGCTCCTATTATGCTCCGTCT  
TGCATGGCACTCTGCTGGTACCTTTGATGTGCAGTCAAGGACTGGAGGACCTTTCCGT  
ACAATGAGGCACAAGGGAGAGTTGGCTCATGGGGCTAACAACGGCCTTGATATTGCTG  
TTAGGTTGTTGGAGCCCATCAAGGAACAGTTTCCCGAACTATCTTATGCTGACTTTTAC  
CAGTTGGCTGGAGTTGTGGCTGTTGAAGTTACTGGAGGCCCTGAAGTTCCCTTCCACC  
CAGGAAGAGAGGACAAGCCAGAGCCACCCCAAGAAGGCCGTCTCCCTGATGCCACTA  
AGGGTTGTGACCACTTGAGGGACGTCTTCATTAAGCAAATGGGTCTTACTGACCAGGA  
CATCGTAGCTCTCTCTGGAGGCCACACCTTGGGAAGGTGCCACAAGGACCGCTCTGGT  
TTTGAGGGCCCTTGACCTCTAACCTCTGGTTTTTCGACAACTCCTATTTTACGGAGCT  
CCTAACTGGTGAGAAGGAAGGTCTTTTGAGCTGCCGTCTGACAAGGCTCTTCTTTCT  
GACCCCGTCTTCCGTCCACTGGTTGAGAAATATGCCGTGATGAGGATGCATTCTTTGC  
CGACTATGCTGAGGCTCACCTGAACTTTCTGAAGTTGGGTTTGCCGATGCTTAA

>BvAPX7

ATGACTGATCGTTTATCAATGGCATCTCTCACTACTACTTCCGCCGCCGCTGCAGCAGC  
AGCCTCTCGTCTTCTTCCTTCTTCCTCTATCTCTCGTCTTTCTCTCTCCTATTTCATCGTCT  
TCTTCTTCTTCTCTCAAATGTCTCCGATCATCTCCTCTCGTTTCTCATCTCTTTCTTCGAC  
AGAGAGAAGTTTCAGCTTATGTGACGAAGACGAGGTTTAGTACGAAATGCTACGCTTC  
GAATCCTGAGCAATTGAAGAATGCTAGGGAAGATATTAAGAGCTTCTTAAGACCACG  
TTTTGTCTATCCTATTATGGTTCGCTTAGGTTGGCATGATGCTGGTACTTATAACAAGGAC  
ATTGAAGAATGGCCACAAAGAGGTGGAGCCAACGGCAGCCTGAGGTTTGAAGTTGAG  
CTCAAACATGGAGCTAATGCAGGTCTTGTAATGCCTTGAACTTCTCCAACCCATAAA  
AGACAAGTACTCTGAAGTGACATATGCAGATCTGTTTCAGCTGGCTAGTGCTACTGCAA  
TAGAGGAGGCTGGTGGTCCTAAGATACCCATGAAGTATGGAAGAGTGGAGGTGACCG  
GGCCAGAGCAATGCCCAGAAGAAGGAAGACTTCCTGATGCTGGACCACCTTCACCTG  
CTCAACATCTACGTGATGTGTTCTACAGAATGGGTCTAAATGATAAGGACATAGTTGCT  
TTATCTGGAGCACATACATTGGGAAGGTCTAGACCTGAACGCAGTGGTTGGGGCAAGC  
CAGAGACTAAATACGAAAGATGGACCAGGAGCTCCAGGAGGACAGTCATGGACGG  
CGCAATGGTTGAAGTTTGATAATTCCTATTTTAAGGACATCAAAGAAAAGAGAGATGCA  
GATTTGCTTGTTTTGCCAACTGATGCTGCTCTATTTGAAGATCCATCGTTCAAGGTATGT  
GCTGAGAAATATGCGGCTGATCAAGAAGCATTTTTCAAGGACTACGCTGAATCCCATGC  
CAAACCTCAGCAACCTTGAGGCCAAATTTGACCCTCCTGAGGGTTTCTCCTTAGACGGA  
AGTCCTGCAGGAGCAGCCCCAGAGAAATTTGTAGCAGCCAAGTATTCATCTGGCAAGA  
GAGAGCTTTCGGATTCTATGAAGCAGAAGATTTCGCGCTGAATATGAAGGTTTGGGTG

TAGCCCTGATAAGCCTCTCTCTTCAAACATTTTCTTAACATTATGATTGTTATTGGCGTT  
TTGGCTGTTCTATCATATCTTGCAGGAAATTAA

>BvAPX3

ATGGCGATGCCAGTAGTTAACACAGAGTACCTTAAAGAAATCGACAAAGCTCGTCGCG  
ATCTTCGCGCACTCATCTCTAATCGCAATTGCGCTCCTATTATGCTCCGCCTCGCGTGGC  
ATGATGCAGGGACGTATTGCGCCAAGACCAAGACTGGTGGTCCGAATGCTTCCATTG  
GAATGATGAAGAGTGCGCTCATGGTGCTAATAATGGTTTGAAGAAAGCTATTGATTGGT  
GTGAGGAGGTGAAGTCTAAACACCCAAAAATTACTTATGCAGACCTCTATCAGCTTGC  
TGGCGTTGTTGCAGTCGAGGTCACCGGAGGACCTACTGTTGACTTTGTTCTGGTAGA  
AAGGACTCAAATGTGTGTCCCAAAGAAGGACGACTTCCAGATGCCAAACAAGGTGCA  
CCACATTTGAGGGACATATTCTATAGGATGGGTCTCACTGACAAAGACATTGTGGCCCT  
GTCCGGGGGTCATACCCTGGGAAGGGCACATCCAGAGAGGTCAGGCTTTGATGGCCCA  
TGGACCCAGGATCCGCTCAAGTTTGATAACTCCTATTTTCTGGAGCTATTAAAAGGAGA  
ATCAGAAGGACTGTTGCAACTTCCTACTGATAAACTTTGGTGGAGGATCCTGCATTTC  
GCCCTTTTGTGGATCTGTATGCTAAGGATGAGGAGGCCTTCTTCCGGGACTATGCTGCC  
TCACACAAGAACTTTTCAGAACTAGGATTTACTCCTAGTATTGGGGCCAAGTCTCCCA  
AGGACAGCACTGTATTGGCCCAGAGTGCTGTTGGAGTTGCAGTTGCTGCAGCAGTAGT  
CATTCTGAGCTACATCTATGAAGCTCGTAAGCGTGTGTAG

>BvAPX10b

ATGGCAGGAGCAAAGTCTATAGTAGATGCAGAATATCTGAAGCAAATTGAGGGTGCTC  
GAAAAGAACTTCATAATCTTCTGAAGAACAAGCAATTTGCTCCCATCGTGCTTCGCTTA  
GCATTTTCATGATGCAGGTACTTATGACGCTAAAGCAAAGACAGGGGGTGCAAATGGTT  
CAATTAGGAATGAGTTGAACAGCCCTGCCAACAAATGGTATCAAAGTTGCTGTTGACTTT  
TGCGAGCAAGTGAAGACTAAATTCCCAAAGGTTACTTATGCTGATCTTTATCAGCTTGC  
TGGTATGATTGCAGTTGAAGTTACTGGGGGGCCTATTATCCCTTTTATCCCCGGTCGACC  
AGATGCTCCGAAACAACAAGATGGTGGAGCTCTTCCAAATCCCAATGGAGATGCGCAA  
CATCTGAAGGATGTATTCTATCGAATGGGCTTGAACGACAGGGATATTGTGGTTCTATCA  
GGGTCTCATTCACTGGGTCGAGCAAACAAGGATAGATCGGGATTTGATGGTCCTTTCAC  
CCAGGATCCTTTCAAATTTGACAATTCCTACTTTGTAGAGTTGAGGAAGGGTGACAGTC  
CTGGACTGGTGAAATTCCCCACAGACAAAGTTCTCGCAGATGATCCTTCTTTCCGTCA  
ATATGTTCAACTATATGCTAAGGACGAAAAAGCATTCTTCGCACATTATGCGGAGTCAC  
ACAAGAAGATGTCGGAGCTGGGGTTCAACCCACCCAAGTTGCCAGTAAAAGCTTGA

>BvAPX1a

ATGGGAAAGTGCTACCCCACTGTTAGCGAGGATTACCAGAAGTCTATCGAGAAGGCCA  
AGAGAAAGCTCAGAGGTTTAATTGCAGAGAAGCATTGTGCTCCTATTATGCTCCGTCTT  
GCATGGCACTCTGCTGGTACTTTTGATGTGCAGTCAAGGACTGGAGGACCCTTTGGTA  
CAATGAGGCACAAGGGAGAATTGGCTCATGGGGCTAACAACGGTCTTGATATTGCTGT  
TAGGTTGTTGGAGCCCATCAAGGAACAGTTTCCCGAACTATCTTATGGCGACTTTTACC  
AATTGGCTGGAGTTGTGGCTGTTGAAGTTACAGGAGGCCCTGAAGTTCCGTTCCACCC  
AGGAAGAGAGGACAAGCCAGAGCCACCCCAAGAAGGCCGTCTCCCTAATGCCACAAA  
GGGTTCTGACCACTTGAGAGACGTCTTCATTAAGCAAATGGGTCTTAATGACCAGGAC  
ATTGTAGCTCTCTCTGGAGGCCACACCTTGGGAAGGTGCCACAAGGACCGTTTCGGGT  
TTGAGGGTCTTGGACCTCTAACCCTCTGGTTTTTCGACAACTCCTACTTTACGGAGCTT  
CTAACTGGTGAGAAGGAAGGTCTCCTACAGCTGCCATCTGACAAGGCTCTTCTTTCCG

ACCCTGTCTTCCGCCCACTGGTTGAGAAATATGCAGCTGACGAGGATGCATTCTATGCC  
GATTATGCTGAGGCCACCTGAAACTGTCTGAACTTGGGTTTGCTGATGCTTAA

>BvAPX10a

ATGGCAAACGCGCAATTGCACATTGTGGATTGTGAATATCTGAAACAAATTGAGGGAG  
CTCGTCGAGATCTTCATGATCTGCTGCTGAACAACAAGCAATTTGCTCCTATCGTGCTT  
CGCTTAGCATTTACGATGCAGGTACTTATGACGCCAACGCGAAGACAGGGGGTCCAA  
ATGGTTCCATTAGAAATGAGTTGAGCAACCCTCCTAACAAATGGTATCAAAAATGCTATT  
GATTTTTGCGAGCAAGTGAAGACTAAACACCCCAAGGTTACTTATGCTGACCTTTATCA  
GCTTGCGGGTGTAGTTGCGGTTCAAGTTACCGGAGGCCCTTTTATTCCCTTTATCCCGG  
GTCGACCAGATGCCCCGATCAACAAGACAGTGGAGCTCTTCCAAACCCCAATGGAG  
ATGGCCAGCATCTCAGAGATATATTTTATCGAATGGGCTTGAACGATAAGGATATCGTG  
CTCTATCAGGGGCTCACTCACTGGGTCGAGCACACCAAGATAGAACACCTGGCTTTGA  
TGGCCCCCTCACTGAAGATCCCTTGAAATTTGACAATTCCTATTTTGTAGAGCTGATGA  
AGGGTGATACTCCTGGACTGGTAAAGTTCCCTACAGACAAAGTTCTTTTGGAGGACCC  
TGCTTTTCGTCAATTTGCTGAACTGTATGCCAAGGATGAAAAGGTGTTCTTCGCAGATT  
ATGCACAATCGCAAAAGAACTATCGGAGCTCGGGTTTAACGCACCACGTTGA

>BvAPX10c

ATGGGGAGAGTACCAGTGGTAAACGAAAACCTATTGCAGGGTCATTGAGGCTGCTCGTA  
GAGACCTGCGTTCTGTTCATCCAAAACAATAAGAACGCAGCACCTATTCTCCTCCGCTTA  
TCATTTTCATGATGCAGGAAACTATGATGCTAGAGCAAAGCGCGGAGGTGCAAATGGTT  
CAGTTAGGTTTACTCAAGAGTTGAACCGTCCCGTCAACAAGGGAATGGAAAACGCTAT  
TAGACTTTGTGAACCAGTAAAGCGCAGACACCCTGATATTACATATGCTGACCTTTATC  
AGCTTGCGGGAATTGTTGCAGTTGAGGTAACCTGGAGGTCCTGCTATTGAATTTGTTCCA  
GGTCGAGCTGATATCGATTACCCGATGCAGACGGAATTCCGAACCCTAGAGGAGGAG  
TGGATCATCTGAGAACAACATTCTACCGAATGGGCCTCAATGACAAAGATATCGTGGTA  
CTTTCAGGGGGCCCATGCACTGGGTGGAGCACATAAGGACAGATCAGGCTTTGATGGCA  
ATTCACCCAAAATCCTCTCAAGTTTGATAACTCCTACTTTGTGGAGCTGCTAAGGGGT  
GATACTCCAAGATTGGTGAAACTACCCACAGATAAGGCTCTCTTAAACGATTCCGTCTT  
CCGTCGCTTTGTTGAACTTTACGCTAGGGATCAAAGAGCATTTTTCAGAGATTACGCAG  
AATCGCACAGAAGCTATCAGAGCTAGGGTTCAATCATCAAGAATCCGACTTATATGAA  
GATGACAGCTGCGACGAGTCGGTTGGTTGTGCGCAGTCCTATGCAGTTGAAGATGGCT  
GCTGTCCTGCGCAGTTTGGGTATGCTCGACCCTATGCTGTTGGAAATGGCTGTCCAGCT  
AACTATTACTAA

>BvAPX10d

ATGGGGAGAGTACCAGTGGTAAACGAAAACCTATTGCAGGGTCATTGAGGCTGCTCGTA  
GAGACCTGCGTTCTGTTCATCCAAAACAATAAGAACGCAGCACCTATTCTCCTCCGCTTA  
TCATTTTCATGATGCAGGAAACTATGATGCTAGAGCAAAGCGCGGAGGTGCAAATGGTT  
CAGTTAGGTTTACTCAAGAGTTGAACCGTCCCGTCAACAAGGGAATGGAAAACGCTAT  
TAGACTTTGTGAACCAGTAAAGCGCAGACACCCTGATATTACATATGCTGACCTTTATC  
AGCTTGCGGGAATTGTTGCAGTTGAGGTAACCTGGAGGTCCTGCTATTGAATTTGTTCCA  
GGTCGAGCTGATATCGATTACCCGATGCAGACGGAATTCCGAACCCTAGAGGAGGAG  
TGGATCATCTGAGAACAACATTCTACCGAATGGGCCTCAATGACAAAGATATCGTGGTA  
CTTTCAGGGGGCCCATGCACTGGGTGGAGCACATAAGGACAGATCAGGCTTTGATGGCA  
ATTCACCCAAAATCCTCTCAAGTTTGATAACTCCTACTTTGTGGAGCTGCTAAGGGGT

GATACTCCAGGATTGGTGAAACTACCCACAGATAAGGCTCTCTTAAATGATTCCGTCTT  
CCGTCGCTTTGTTGAACTTTACGCTAGGGATCAAAGAGCATTTTTCAGAGATTACGCAG  
AATCACACAAGAAGCTATCAGAGCTAGGGTTCAATCATCAAGAATCGGACTTATATGAA  
GATGACAGCTGCGACGAGTCGGTTGGTTGTGCGCAGTCCTATGCAGTTGAAGATGGCT  
GCTGTCCTGCACAGTTTGGGTATGCTCGACCCTATGCTGTTGGAAATGGCTGTCCAGCT  
AACTATTACTAA

>BvCAT2

ATGGATCCGACTAAGTATCGCCCCGCAAGTGCTTACAATTCCCCGTA CTTAACCAACAA  
TAATGGTACACCTGTTTGGAACGATAACTCTTCGTAACTGTTGGCCCCAGAGGTCCCA  
TTCTGTTGGAAGATTATCATTTGATAGAAAAGATAGCAACTTGGACCCATGAGCGTATA  
CCTGAACGTGTTGTACATGCTAGGGGAGCAAGTGCTAAGGGGTTTTTTGAAGTTACCC  
ATGACATTGCACATCTTACGTGTGCTGATTTCTACGTTCCCCCGGTGTTTCAGACGCCA  
GTTATTGTTTCGGTTTTCAACTGTTATTCATGAACGTGGTAGTCCGGAAACACTCAGAGA  
TCCTCGTGGTTTTCGCTGTTAAGTTCTATACTAGAGAGGGTAACTTTGATATAGTTGAAA  
CAACTTCCCAGTGTTTTTCACCCGTGATGCAATGCAATTTTTTGATCTAGTCCGAGCATT  
CAAACCCAACCCAAAATCCCATCAAGAAAAGTTGGAGGTACATGGATTTCTGTTTCG  
TACCTCCCAGAGTCTCTCAACACCTTCTCATTCTTCTTCGACGACGTTGGTATCCCTCTA  
AACTACCGTCACATGAACGGTTCCGGTGTCACACCTTCACCCTTATCAACAAAGCCG  
GCAAAGTAACATACGTGAAATTCCATTGGCGCCCAACTTGCGGTGAAAAGAATTTGCT  
CGAGGAAGAAGCCATTTCGAGTTGGAGGTGAAAACACAGCCACGCGACTCAAGACCT  
TTACGAGTCGATTGCATCGGGTAACTTCCCAGAATGGAAGCTTTACATTCAGACTATGG  
ATCCGAATGATGAGGATAAGTTTCGATTTCGATCCACTTGATATGACTAAAACATGGCCT  
GAAGATATCTTGCCCTTACAACCTGTAGGACGTCTTGTTGTTGAACAAGAATGTTGACAA  
CTTTTTTACTGAAAATGAGCAACTGGCTTTTGATCCAGCCCATGTTGTTCTGGGATTTA  
TTTCTCTAATGATAAGATGCTTCAAGCGCGTACTTTTGCGTATGCTGATACACATAGATAT  
CGTTTGGGTATCAACTACTTGCAGCTTCCTGTTAATGCTCCTAAGTGCCCGCATACTAAT  
ATGCATCGTGATGGTGCTATGAACATGGTGCACAGGGATGAAGAGATTGACTATTTCCC  
ATCAAGGTTTGATCCTCTTCGTGAAGCTGAAAGATTCCCTATTCCAACAGCAATCATCC  
ATGGAAGGCGTGAAAAGCAAATCATTCCAAAGGAAAACA ACTTCAAGGAGCCGGGAG  
TGAGATACCGATCATGGGACCCAGCAAGGCAGGACAGATTTGTTGGAAGATTTGTGAA  
GGCTTTATCAGATCCTCGCCTTACCTATGAGATCCGTAGCATTTGGGTTTCATACTTGAC  
TCAGGCTGACAAATCTCTGGGTATGAAAGTGGCAAGTAGACTCAATATAAGACCAACC  
ATGTGA

>BvCAT1

ATGGATCCATACAAGTTTCGACCATCAAGTGCGAACAATGCTCCTTATTGTACCACAAA  
TTCTGGTGCACCTGTTTGGAAATAACA ACTCTTCATTA ACTGTTAGTCACAGAGGCCCAA  
TCCTTTTGGAGGACTACCATCTGGTGGAAAAGCTTGCCA ACTTTGATAGAGAGCGTATA  
CCAGAACGTGTTGTTTCATGCCAGGGGAGCTAGTGCTAAGGGATTTTTTGAAGTTACTC  
ATGATATCTCACACCTCACATGTGCTGATTTTCATGCGTGCTCCTGGTGTCCAGACACCT  
GTAATTGTTTCGTTTCTCCACTGTTATTCATGAACGTGGCAGTCCCGAAACCCTTAGGGA  
TCCTCGTGGTTTTGCTGTGAAGTTTTACACCAGAGAGGGTAACTTTGATCTTGTGGGGA  
ACAATTTCCCTGTGTTTTTCATTTCGTGATGGAATGAAATTCCCGGATATGGTGC ACTCCC  
TCAAGCCCAACCCCAAATCTCACATTCAAGAAAATTGGAGGGTCATGGATTTCTTCTCT  
CACCATCCTGAGAGTTTGCACATGTTCACTTTCCTCTTTGATGATATTGGAGTTCCTGCA

AACTACAGGCATATGGAAGGTTCTGGTGTTAACACATATACTCTGATTAACAAGGCTGG  
CAAAGTACACTACGTGAAGTTCCACTGGAAGCCAACATGTGGAGTGAAAAGCCTGTT  
GGAGGATGAGGCCATAAAAGTTGGAGGAGCTAACCACAGCCATGCTACTCAGGATCTG  
TATGACTCAATTGCTGCTGGCAACTATCCTGAATGGAACTCTTCATCCAGATCATAGA  
CCAAGCTGATGAAGACAAGTTTGACTTTGACCCGCTTGATGTTACAAAGACATGGCCT  
GAGGACATCTTGCCTCTACTGCCAGTTGGCCGTATGGTCTTGAACAAGAATATCGACAA  
CTTTTTTGCAGAAAACGAACAACCTGGCATTGTTGCCCGGCTATCGTTGTTCTGAGTCT  
CCTACTCCGATGACAAGCTTCTTCAGACTCGAATCTTCTCCTATTCTGATACCCAAAGA  
CACCGTCTTGGTCCCAACTACCTGCAACTTCCAGTTAATGCCCCAAGTGCTCTCATCA  
CAACAATCACTATGATGGTTTCATGAACTTTATGCACAGAGATGAGGAGGTGCGACTACT  
TCCCATCAAGATATGATCCTGTTTCGTCACGCTGAGAGACATCCCATTCCCTTCAAACGTC  
ATAAATGGAAAGCGTGAAAGGCAAATCATTGCGAAGGAAAACAATTTCAAGCAGCCT  
GGAGAGAGATACAGATCAATGGACCCAGCCAGGCAAGAGCGATTTCATCTGCAGAGTG  
GTTGATGCTTTATCTGATCCTCGCATCACTCATGAGATCCGCAGCATATGGGTTTCATAC  
TGGTCTCAGGCTGATAAATCTCTGGGTATGAAAGTAGCAAGTAGACTTAATGTGAGGCC  
AACTATGTAA

**CDS sequence of SOD, APX and CAT gene family members in *Chenopodium pallidicaule***

>SoCSD3

ATGGGCGGCAGTTTGAAAGGAGTGGCTGTCATCTCCGGCGTCAATAATGACATCAAAG  
GCTCTCTTCACTTCATCCAACACCCACCGGGATAACACATGTAAATGGAAGAATCACT  
GGGCTTACACCTGGCCGCCATGGCTTCCATATTCATGCTCTTGGTGATACCACTAATGGT  
TGCAACTCCACTGGGCCTCATTTTAATCCAATGAAGAAGGATCATGGAGCACCATCTGA  
TGCAGAACGACATGCGGGTGACCTGGGAAACATTGTTGCTGGCAGTGATGGGGTTGCT  
GAGATTTCCATTAGTGACTTCCAGATACCACTAAGTGGGCAACACTCAATTCTTGGAAG  
GGCTGTTGTGGTGATGCTGATCCAGATGATCTTGGAAGAGGTGGGCATGAACTCAGC  
AAGACAACAGGGAATGCTGGTGCTAGAGTAGGATGCGGTGTAATTGGGTTGCAATCGT  
CTGTTTAA

>SoCSD1

ATGGGAAAGGCTGTGGTTGTTCTAAGCAGCAGTGAGGGTGTTTCTGGAACAGTCTACT  
TTGCCCAGGAAGGAGATGGTCCAACAACCTGTTACTGGAAATGTCTCCGGTCTCAAGCC  
TGGGCTCCATGGATTTCATGTTTCATGCCCTTGGTGACACAACAAATGGCTGCATGTCAA  
CTGGGCCGCACTATAACCCAAATGGAAAAGAGCATGGTGCTCCAGAAGACGATGTTTCG  
CCATGCTGGTGATCTTGGAACATCACAGTTGGGGATGATGGTACTGCTACCTTTACCA  
TCATTGACAGTCAGATACCTCTTTCTGGACCCAACTCTATTGTGGGGAGGGCCGTTGTT  
GTCCATGCTGAACCCGATGATCTTGGAAGGGGTGGACATGAACTCAGCAAGACCACA  
GGCAATGCTGGTGGAAGAGTGGCTTGTGGCATTATTGGTCTTCAAGGTAA

>SoCSD2

ATGCAAGCAGCATTGGCAGCCATGGCCGCACACACCATTCTCGCATCTGCACCTTCTCA  
TACAACATTCTCTCTCATCTCTCCCTTCTCTTCCACGCCACAAACGCCCTTTCATCTTC  
CCTTCAATCTTCTTCTTCAATGGTCTCTCCTTCAAGCTAAGCCCAACCAATCCCT  
CTCTCTTTCTACTTCCGCGGCCTCGAAACCACTCACCATTGTTGCTGCTACCAAGAAAG  
CTGTTGCTGTTCTTAAGGGTACTTCTAATGTTGAGGGCGTCGTCACCTTTGACCCAAGAA  
GATGATGGTCCAACACTACAGTCAATGTCCGTATTAGTGGACTTGCTCCTGGGAAGCATGG  
ATTTCACTTGCATGAGTTCGGAGATACAACAAATGGGTGCATGTCTACAGGTCCACATT

TTAATCCTGATAAGAAGACACATGGTGCTCCGGAAGATGAAGTCCGGCATGCGGGTGA  
CCTGGGAAACATTGTTGCTAACACAGATGGAGTGGCTGAGGCTACCATTGTTGACAAT  
CAGATTCCATTGACTGGACCAAATTCAGTTGTTCGGTAGAGCCCTTGTGGTTCATGA  
TGAGGATGACCTTGGAAGAGGTGGACACGAACTTAGTCCGACCACTGGGAATGCTGG  
TGGAAGATTGGCATGTGGTGTGGTTGGATTAACCTCCAGTGTAG

>SoCSD4

ATGACGATTCTGAGGTCAATAGTTACAACAACAACCGCCATAGCAGCCACTGCTCTGC  
CTGCAGCTTACGTCGCATCGTCTCTCTCTCACTCTTCTTCATCTCCGACCTCAAAATCTC  
TGAACCTCCGCTTTCTCTCTCCTCAATCAGCTTCGAGCTCCATCGCTGGCACTAGATTG  
GGGCTTGTAAGAAGTTTCACTCTCCGCCTTCTGCTGTTCAAATGGAAATTCCCAAGTC  
TTCTCCTCAAGAAGATTTGAAGTTGCCGGACTTAATGACAGAGTTCATGGTGGATATGA  
AGTGTGAAGGCTGTGTTAGCGCAGTCCAGAGTAACTAGAGACTCTAGAAGGAGTGA  
AGAGTATTGAAGTGGACTTGAGCAATCAAGTTGTTAGGATTCTTGGTTCCTCGCCCGTG  
ATAACTATGGAACTGCTTTGGAGCAAAGTGGCCGTAAAGCTCGACTGATTGGTCAAG  
GTGTACCTGAAGATTTCCTTGTGTCTGCGGCTGTTGCCGAATTCAAAGGCCAGATATC  
TTCGGAGTAGTTTCGCTTTGCTCAGACGCACATGGAATTGACTAGAATCGAGGCCAATAT  
TAGTGGGTGCCATCAGGGAAACATGGATGGTCTATAAACGAGTTTGGTGATCTGACTA  
GAGGTCCAGCTAGCACAGGGAAAGTGTACAATCCGCCAGTCCAAGGAAGTGGAAAGTG  
AGCCGTTGGGTGACCTGGGAACATTAGAAGTCGATGAGAAAGGTGAAGCTTATTACTC  
AGGAATCAAGAAGATGATGAGGGTCTTTGATTTAATCGGACGGTCAATTGCATTGTATG  
CATCGGAGGACAAGTCTGATCCTGGCCTTGACAGCTGCAGTGATTGCTAGGAGTGC  
AGTAGGTGAGAACTATAAGAAGCTTTGCACATGCGACGGAAGTACGATTGAGGCA  
AAGCCTGATGCTGTCACTAGCAAAGTCTGA

>SoFSD1

ATGTCTGCTGTTGCTGCTCCTTCCGCTATTTCCATTTCTTCCTCATTTCTCACTCATCCAG  
TTATGTTTGCAGGGTTTAAAGGGGGGCTCAACTCTACCCGCTTCTCACCATGGAACTC  
AAGGAAACAAGAGTAAGAAGAGCCAGTGCTGATGTTGTTACAGCCAAGTTTGATTG  
AATCCCCCACCTTATCCAATTGATGCCTTGAGCCTCACATGAGCAAACAGACATTTGA  
ATATCATTGGGGGAAGCATCATAGAGCATATGTGGATAACTTGAACAAGCAAATAGTTG  
GAACAGAATTAGATGGATTACCTCTCGAAGAAGTAGTACGTATCACATATAATAAAGGG  
GACATGCTTCTGCAATTAATAATGCAGCACAGGCCTGGAACACGAGTTCTTTTGGGA  
GTCCATGAAGCCTGGTGGTGGGGGAAAGCCTTCTGGCGAGCTTTTGGCACAAATTGAA  
AAGGATTTTGGTTCTTTTGAAGCATTACTACTGAATTCAAGACTGCTGCAGCCACACA  
ATTTGGTTCTGGCTGGGCTTGGCTTGTATAAAGCAAATAAATTGGATGTCGGAAATG  
CAGTAAACCCGAAGCCTTCCGAAGATGACAAGAAGCTTGTAGTTGTCAAGAGCCCAA  
ATGCTGTGAACCTCTCGTTTGGGATTATTATCCAATTCTTACTGTTGATGTTTGGGAGC  
ATGCGTATTACTTGGACTTCCAGAATCGAAGGCCTGATTACCTCTCGATCTTCATGGAA  
AACCTTGTTCCTGGGATGCTGTCAATGCAAGATATGAGGCAGCCAAGGCTTTTGCTAC  
CGAGAGAGAGGAAGAGGCAGCGCAGAATTAA

>SoMSD1

ATGGCGTTTCGAACACTGTTGACCCGAAAAGCCCTAACTTCTGCATTTTCAAAGCAAG  
GTACTCTTCTCCAATGTCGATCGTTGCAGACTTCTCTCTCCCTGATCTTCCGTACGACT  
ATGGCGCTCTTGAGCCCGCCATTAGCGGCGAAATCATGCAGATCCATCATCAGAAGCAT  
CATCAGACTTACATCACTAACTACAACAAAGCTCTTGAGCAGCTCGATGATGCTATGGC



TAAAGGCGATGCATCTACTGTTGTCAAGCTTCAGAACGCCATTAAATTCAATGGCGGAG  
GTCATGTAAATCACTCAATTTTCTGGAAGAACCTTGCTCCAATTAATGAAGGAGGTGGT  
GAGCCTCCAAAATCTTCATTGGGTTGGGCGATTGATTCAAATTCGGTTCTCTAGAAGC  
TCTTATCCAGAAAATGAATGCTGAAGGAGCTGCCTTACAAGGTTCTGGGTGGGTGTGG  
CTTGGA TAGATACACAGTCGAAGAAGCTTCTTGTTGAAACCACTCCAAATCAGGACC  
CACTGGTAACTAAAGGACCCAGCTTGATTCCTATACTCGGTATTGATGTGTGGGAGCAT  
GCATACTACCTGCAGTACAAGAATGTGAGACCTGATTATCTGAAGAACATCTGGAAGG  
TTATGA ACTGGAAATATGCAAGCGAGGTGTATGAGAAAGAGTGCCCCAGCCACTAA

>SoFSD2

ATGCTGCTAACTAGTAAGGGAGTTGGAAAATCAGAAATGGGAAGCTTAACTGCCACTA  
ATCCTGTTAGCTCACCTCTTCATGCCAATGGCTTATCTTCCAGGATTAAATGCCCACTT  
TTTTTAATCAGAAAAGAAGAGATGAAGGTTGCAAAAAGAAGGCCTGGAGTTGTTGCTTA  
CTATGGGCTGAAAAAGCCTCCCTATAACCTTGATGCATTAGAACCATATATGAGCCAGA  
AAACTCTGGAGTCACATTGGGGAGTGCAACATAGAAATTACTTGGAAGCTTTGAATAG  
ACATTTAAGTAGAAGCGACACACTATATGGCCATACTATGGATGAACTTGTGAAAGTAA  
CCTACAATTATGGAATCCCTTGCCTGAATTCAATGATGCTGCTCAGGTCTGGAATCATG  
ACTTTTTCTGGGAATCCATGCAACCTGGAGGCGGGGAGTCTCCAACACTGGGTCTTCT  
TCAGCAGATAGAAAAAGATTTTGGTTCTTTCCCAAACCTTTAAAGAGAAATTTATAGAGG  
CAGCCATGACGCTCTTTGGTTCTGGCTGGGTTTGGCTTGTTTTGAAGAGGAAGGAGAA  
GCAACTTGCAGTTGTTAAGACATCCAATGCAGTCACTCCTATTCTCTGGGATGATATCCC  
CATCATATGCTTGGATTTGTGGGAGCATGCATACTACTTGGATTATAAGAATGATAGAGC  
GGAATATGTAAATGTTTTTCATGAACCACCTTGTATCATGGCATGCAGCAACAGCACGCC  
TTGCTCGGGCACAGGCTTTTGTGAATCTTGGAGAACCTAAATTCAGTTGCTTAA

>SoAPX9a

ATGCGAAGAACGAAAAAACAGTTGGTGAATGCAGAATATTTGAAGGAAATCGAGAGA  
ACACGAAGAGATCTCCGTGCTCTCATCTCTACCAAGCAATGTGCTCCTATCATGCTTCG  
CTTAGCATGGCACGATGCGGGTACATATGATGCAAAGACAAATTCAGGGGGTCCAAAT  
GGTTCAATTAGGAACGAGCACGAGTTGAGATACAAAGCCAACAGTGGCCTCAAGATT  
GCTCTTGAAC TTTGTGAAGAGGTTAAGGCTAATCAACCAAAGATCACATATGTGGATCT  
TTATCAGCTTGCTGGGGTTGTTGCGGTTGAAGTCACAGGAGGGCCAACCATCGACTTT  
GTTCCAGGAAGAATGGATTGCGCAGATTCTCCTGATGAAGGACGCCTTCCTGATGCAA  
ATCAAGGTGCCGGACATTTGAGAGACATCTTTTACAGAATGGGGCTTTCTGACAAGGA  
TATTGTCGCGCTTTCAGGAGGCCACACTCTGGTATATTTATCACCATTTGTTGGGACATA  
A

>SoAPX10

ATGGCAGCAACAACAAAGAGCATTGTAGATGTTGAATATCTGAAACAAATTGAGGGAG  
CTCGTAAAGACCTTCTTGATCTTCTTCAGAAGAACAAGAAGTTTTCTCCCATTGTGCTT  
CGTTTAGCATTTTCATGAAGCGGGTACTTATGACGCCAAAAC TAAAACAGGAGGTCCAA  
ATGGTTTCGATTAGGAATGAGTTGAACAACCCTGCCAACAACGGTATCAAAGTTGGAGT  
TGATTTTTGCGAACAAGTGAAGGGTAAACACCCCAAAGTTACTTATGCTGACTTTTACC  
AGCTTGCTGGAGTAATTGCTGTTGAAGTTACTGGAGGCCCTAAGATCCCATTTTTCCCG  
GGTCGACCCGATGCGCCAAGTCAACAAGACAGTGGAGCTCTTCAAACCCCAATGGA  
GATGCCAAGCATCTTAGGGATATATTTTATCGTATGGGGTTGAACGATAGGGATATCGTT  
GCTCTATCAGGATCTCACACACTGGGTGAGCAAATCAGGATAGATCAGGTTTTGATGG

TCCTTTCACCGAGGATCCTTTCAAATTCGATAATTCGTATTTTGTAACCTTGAGGAAGA  
GTGACACCCCTGGACTGGTGAAATCCCCACTGACAAAGTTCTTGTGGAAGATCCTGC  
TTTCAGTCGCTATGTTCAACTCTATGCTAAGGATGAAAAGACTTTCTTCGCACACTATG  
CGGAATCACACAAGAAGATGTCGGAGCTCGGGTTTCGCCACCAAGCCCGGTCGTGA  
AAGCTTGA

>SoAPX3c

ATGTCACACGCACAGTTGAAAGCAGAGCAGATTGTGGATGAAGAGTACTTGAAACAA  
ATTGAAGGAGCTCGTAGACATCTTCATTGTCTTCTGCAAAACGATAAGCAGTTTGCTCC  
AATCTTGCTTCGCTTAGCATTTTCATGATGCGGGTACTTATGACGCGAAAACAAAGACAG  
GAGGTCCAAATGGTTTCGATTAGGAATGAGTTGAGCAATCCTCCCAACAATGGTGTTAA  
AAATGCTATTGATTTTTGCGAACAAGTGAAGGTCAAGTACCCCAAGGTTACTTATGCTG  
ACCTTTACCAGCTAGCTGGTATGGTTGCAGTTGAAGTTACTGGAGGTCCGATTATCCCT  
TTTGTCCCCGGCCGTCCGGATGCCCCGAATGAACAAGACAGTGGAGCTCTTCCAAATC  
CCAATGGAGGATCCAATCATCTGAAAGATATATTTTACCGAATGGGCTTGAACAATAGG  
GATATTGTTGTTTTATCTGGAGCTCACACACTGGGTTCGAGCACACAAGGATAGGTCAGG  
TTTTGATGGTCCTTTACCGAACAACCTTTGAAGTTCGACAATTCCTATTATGTAACTT  
GAGGAAGCCTGACATTCCTGGACTGGTGAAATTCCTTCGGATAAAGTTCTCGCTGAG  
GATCCTGATTTCCGTCGCTATGTTCAACTGTATGCTAAGGATGAGAAGGTGTTCTTCGC  
ACACTATGCTGAGTCACACAAGAAGATGTCGGAGCTCGGGTTTCACCCACGTGCACCT  
TGCTCTTGCTCTGCTATGAAAGCTTGA

>SoAPX7

ATGACTGATCGTCTAGCAATGGCATCCTTCACTACCACCACCGCCGCGCTGCATCTCG  
TCTGCTTCCTTCTTCTCCTCCTCCATCTCTCGACTTTCTCTCTCCTCTTCTCCTCCTCC  
TCCTCCTCACTCAAATGTCTCCGATCATCTCCACTCGTCTCTCACCTCTTCCTTCGACAG  
AGAGGAGGTTTCAGCTTATGTGACGAAGACGAGGTTTAGCACGAAATGCTACGCTTCTG  
ATCCTGCGCAGCTGAAGAATGCTAGGGAAGATATTAAAGAGCTTCTTCAATCTAAGTTC  
TGTCATCCTATTATGGTTTCGCTTAGGTTGGCACGATGCCGGTACTTATAATAAGGACATT  
AAAGAATGGCCACAAAGAGGTGGAGCCAATGGCAGTCTGAGGTTTGATGTTGAGCTC  
AAGCATGGAGCTAATGCAGGTCTTGTTAATGCCCTGAACTTCTACAGCCCATAAAAG  
ACAAGTACTCTGGAGTTACATATGCAGATCTATTCCAGCTGGCTAGTGCTACTGCAATA  
GAGGAGGCTGGTGGTCCAACAATACCCATGAAGTATGGAAGAGTGGATGCCACAGGG  
CCGGAGCAGTGCCCAGAAGAAGGAAGGCTTCCTGATGCTGGACCTCCTTCACCTGCTC  
AACATCTACGTGATGTTTTCTACAGAATGGGTCTTGATGATAAGGATATAGTAGCATTAT  
CTGGAGCACATACGTTGGGAAGGTCTAGACCTGAACGCAGTGGTTGGGGCAAGCCAG  
AGACTAAATACACGAAAGATGGACCTGGAGCTCCAGGAGGGCAGTCATGGACTGCGG  
AGTGGTTGAAGTTTGATAATTCCTATTTCAAGGACATCAAAGAAAAGAGAGATGCAGA  
TTTGCTTGTTTTGCCAACTGATGCTGCTCTTTTCGAAGATCCGTCTTTCAAGGTATATGC  
AGAGAAATATGCAGCTGACCAAGAAGCATTTTTCAAGGATTACGCTGAAGCCCATGCC  
AACTCAGCAACCAAGGAGCCAAATTTGACCCTGCTGAGGGTATCACTCTTAATGGAA  
CCCCTGCCGGAGCAGCTCCAGAGAAGTTTGTAGCAGCCAAGTACTCATCTAACAAGAG  
ATCAGAGCTTTTCGGATTCTATGAAGGAAAAGATTTCGCGCTGAATATGAAGGTTTTGGAG  
GTAGCCCTAATAAGCCTCTACCAACAACTACTTCCTAAACATTATGATTGTGATTGGAG  
TTTTGGCAGTTCTATCATATCTTGCGGGAAATTGA

>SoAPX10a

ATGGCAGCAACAACAAAGAGCATTGTAGATGTTGAATATCTGAAACAGATTGAGGGTG  
CTCGTAAAGACCTTCTTGATCTTCTCCAGAAGAACAAGAAGTTTTCTCCCATTGTCCTT  
CGTTTAGCATTTTCATGAAGCAGGTACTTATGACGCTAAAACAAAAACAGGAGGTCCAA  
ATGGTTCGATTAGAAATGAGTTGAACAACCCTGCTAACAACGGTATCAAAGTTGGTATT  
GATTTTTGTGAGCAAGTGAAGGGTAAATACCCCAAGGTTACTTATGCTGACTTTTACCA  
GCTTGCTGGAGTGCTCGCTGTTGAAGTTACTGGAGGACCTAAGATCCCGTTTTTCCCG  
GGTCGACCTGATGCCCAAATAACCAAGACAGTGGAGCTCTTCCAAACCCCAATGGAG  
ATGCCAAGCATCTCAAGGATATATTTTACCGAATGGGCTTGAACGATAGGGATATCGTTG  
TTCTATCAGGGTCTCACACACTGGGTCGAGCAAATCAGGATAGGTCAGGATTTGATGG  
GCCATTCACAGAGGATCCTTTCAAATTCGATAATTCCTACTATGTAACTTGAGGAAGA  
GTGATACCCCTGGACTGGTGAAATTCCCGACTGACAAAGTTCTGGTGGAGGATCCTTC  
TTTCAGTCGCTATGTTCAACTCTATGCTAAGGATGAGAAGGCTTTCTTCGCACACTATG  
CTGAATCACACAAGAAGATGTCGGAGCTCGGGTTTCGCCACCTACCCCTGCAGTCAA  
AGCTTGA

>SoAPX9

ATGATGGGAAGAACGAAAAACAGTTGGTGAATGCAGAATATTTGAAGGAAATTGAG  
AGAACACGAAGAGATCTCTGTGATCTCATCTCTACCAAGCAATGTGCTCCTATCATGCT  
TCGCTTAGCATGGCACGATGCAGGCACATATGATGCAAAGACAAATTCAGGGGGTCCA  
AATGGTTCTATTAGGAACGAGCACGAGTTGAGACACAAAGCCAACAGTGGCCTCAAG  
ATTGCTGTTGAACTTTGTGAAGAGGTTAAGGCTAATCACCCAAAGATCACTTATGCGGA  
CCTTTATCAGCTTGCCGGGGTTGTTGCGGTTGAAGTCACAGGAGGGCCAACCATCCAC  
TTTGTTCAGGAAGAATGGATTGCGCAGATTCTCCTGATGAAGGACGCCTTCCTGATGC  
AAATCGAGGTGCTGAACATTTGAGAGAAATCTTTTACAGAATGGGGCTTTCTGACAAG  
GATATTGTCGCGCTTTCAGGAGGCCACACTCTGGGTAAGGCACATAAGGACAGATCAG  
GTTTCAAAGGCCCTTGGACCAAAGAGCCATTCAAATTCGACAATTCCTATTTTATTGAG  
TTGCTGAAAGGTGAACAATGGGGGTACTGAAGCTTCCAACTGATAAGGTTCTCATAG  
AGGATCCAAGATTCCGTCCCTTCGTTGAGCTTTATGCCAAGGATGAAGAGGCGTTCTTC  
AAAGATTATGCAGAATCACACAAGAAGCTCTCAGAGTTGGGGTTCACTCCACCCACCA  
CCAACAGTTTGGGGATGATTACTAAAGCTACACTTGGAGTTGTGGTCACTCTTACTGTA  
ATTATCTTAAGCTACCTGTATGAAGTTAATAAACAAGGCTAA

>SoAPX1

ATGGGAAAGAGCTACCCAACCTGTCAGTGAGAACTACCAGAAATCTATTGAAAAGGCCA  
GGAGAAAGCTCAGGGGTTTGATCGCAGAGAAGCAATGTGCTCCTCTTATGCTTCGTCT  
TGCATGGCACTCTGCTGGTACCTTTGATTGTACTTCAAAAACCTGGAGGTCCCTTTGGTA  
CAATGAAGCACCAGGCAGAGCTGGCTCATGGGGCTAACAATGGGCTTGTTATTGCTGT  
TAGGCTGTTGGAACCCATCAAGGAACAATTCCCCGAAATTACTTATGCTGACTTTTACC  
AGCTGGCTGGAGTTGTGGCCGTTGAAGTTACTGGAGGACCTGAAGTTCCTTCCACCC  
AGGCAGAGAGGACAAGCCAGAGCCACCCAGGAAGGACGTCTCCCTGATGCCACCA  
AGGGTTGTGACCATTTGAGAGATGTCTTCATCAAGCAAATGGGTCTTACTGACCAGGA  
CATCGTTGCTCTATCTGGAGGCCACACCTTGGGGAGATGCCACAAGGACCGCTCTGGT  
TTTGAAGGTGCTTGACTACCAACCCTTTGGTCTTCGACAACACCTACTTCAAGGAGC  
TCCTGAGTGGTGAGAAGGAAGGTCTCTTGCAGCTGCCATCTGACAAGGCTCTTCTCTC  
TGACCCTGTCTTCCGCCCACTGGTTGAGAAATATGCAGCTGATGAAGATGCATTCTTTG  
CCGACTATGCTGAGGCGCACTTGAACTTTCTGAACTCGGATTTGCTGATGCTTAA

>SoAPX6

ATGGATCAGATAAATGTTTTGGACCGTTCGCTGAAGATGACCACCCCCGGCGGCGAAT  
CAACAGTAATATGCCGCTCTTTCCGCCACCCAATCATCGACATCCTCCCTCAACAAATTC  
AAATTTCCCGCCAAATATCCACCGTCAACCGTCCATTTTGGCGCCAAAGCAGCTCCGTT  
TCTCACTCCCCCCTTCGCACTTCCACCCACTTCAGATAATTACAGCAATGTTGGTTTTGT  
GTGGAAGGAGAGGACTCATTTTTCTTTCTGTCACTCTACCTTTTCTTTTTCTTCACAA  
GAGTATGTCAAAGATTTCAATGTTGAAGCAGAAGAGCTCAGAGATCCTGATTACGTACT  
TATAAAGGATGAGATAAGGAAGGTTTTGTCTAAAGGAAAGGCTGCTGGTGTACTTCGT  
CTAGTGTTTCATGATGCAGGAACCTTTGAACTCAGGGACAATTCAGGAGGTATGAATG  
GCTCTATAACATATGAACTTGAGAGGCCTGAAAATAAAGGGCTCAAAAAGTCTCTGAA  
GATTATTGAGAAAGCCAAAAATGTGGTGGATGAGAGACAGTCAGTATCCTGGGCAGAC  
ATGATTGCTGTAGCAGGAGCTGAGGCAGTTTCGATATGTGGAGGCCCAGATATTCCAGT  
TCGGTTGGGGAGACTTGATTCACTGACTCCTGATCCTGAAGGGAACTACCTGAAGAG  
TCACTGGATGCACCAAGCTTAAAGAAGTGTTTCCAAACAAAAGGCTTTTCCACACAAG  
AACTTGTTGCACTGTCTGGGGCTCATACTCTTGGAAGTAAAGGTTTTGGAAGCCCCATC  
GAATTCGACAATTCATATTACAAAATACTCCTAGAGAGTCCGCTCTCGTCAGCTGGAAT  
GTCTAGTATGGTTGGACTTCCTTCAGATCGTGCATTAGTCGAGGATGATGAATGCTTAA  
GATGGATTACAAAGTACGCGAATGACCAGGCTTTATTCTTTGAGGATTTTAAGAATGTC  
TATATCAAGTTAGTCAATTCTGGTGCAAGGTGGAATCTTCATGA

>SoAPX1a

ATGGGAAAGAGCTACCCAAGTGTGAGTGAAGGACTACCAGAAATCTATTGAAAAGGCCA  
GGAGAAAGCTCAAGGGTTTGATCGCACAGAAGCAATGTGCTCCTCTTATGCTTCGTCT  
TGTATGGCACTCTGCTGGTACCTTTGATTGTACTTCAAAGACTGGAGGTCCCTTTGGTA  
CAATGAAGCACCAGGCAAAGCTGGCTCATGGGGCTGACAATGGGCTTGATATTGTTGT  
TAGGCTGTTGGAACCCATCAAGGAAAAATTTCCCGAAATTTCTTATGCTGACTTTTACC  
AGCTGGCTGGAGTTGTGGCTGTTGAAGTTACTAGAGGACCTGAAGTTCCCTTCCACCC  
AAGCAGAGAGGACAAGCCAGGGCCACCCAGGAAGGACGTCTCCCTGATGCCACTAA  
GGGTTGTGACCATTAAAGAGATGTCTTCATCTAG

>SoAPX9b

ATGCGAAGAACGAAAAAACAGTTGGTGAATGCAGAATATTTAAAGGAAATCGAGAGA  
ACACGAAGAGATCTCCGTGCTCTCATCTCTACCAAGCAATGTGCTCCTATCATGCTTCG  
CTTAGCATGGCACGATGCGGGTACATATGATGCAAAGACAAATTCAGGGGGTCCAAAT  
GGTTCAATTAGGAACGAGCACGAGTTGAGATACAAAGCCAACAGTGGCCTCAAGATT  
GCTCTTGAACTTTGTGAAGAGGTTAAGGCTAATCAACCAAAGATCACATATGTGGATCT  
TTATCAGCTTGCTGGGGTTGTTGCGGTTGAAGTCACAGGAGGGCCAACCATCGACTTT  
GTTCCAGGAAGAATGGATTGCGCAGATTCTCCTGATGAAGGACGCCTTCCTGATGCAA  
ATCAAGGTGCCGACATTTGAGAGACATCTTTTACAGAATGGGGCTTTCTGACAAGGA  
TATTGTCGCGCTTTCAGGAGGCCACACTCTGGTATATTTATCACCATTGTGTTGGGACATA  
A

>SoAPX10b

ATGGCGATGCCGGTCGTCAACACAGAATACCTCAAGGAAATCGACAAAGCTCGTCGCG  
ATCTTCGCGCTCTCATCTCTAATCGCAATTGCGCTCCTCTCATGCTCCGCCTCGCGTGGC  
ATGATGCAGGGACTTATTGCGCGAAGACGAAGACCGGCGGCCCTAATGCTTCAATTG  
GAACGAGGAAGAGTGCGCTCATGGTGCCAATAATGGTTTGAAGAAAGCTATTGATTGG

TGTGAGGAGGTGAAGTCTAAACACCCAAAGATTACATATGCAGACCTCTATCAGCTTG  
CTGGTGTGTTGCAGTTGAGGTCACTGGAGGACCTACTGTTGACTTTGTTCTGGGAG  
AAAGGACTCAAATGCGTGTCCCAAGGAAGGGCGACTTCCAGATGCTAAACAAGGTGC  
ACCACATCTGAGGGACATATTTTACAGGATGGGTCTCACTGACAAAGACATCGTAGCA  
CTGTCAGGGGGTCATACCCTGGGAAGGGCACATCCAGAGAGATCAGGCTTTGATGGCC  
CATGGACCCAGGAGCCACTCAAGTTTGATAATTCCTATTTTGTGGAACTCTTGAAAGGA  
GAATCAGAAGGACTGTTGCAACTTCCTACTGATAAACTTTGGTGGAGGACCCTGCAT  
TTCGCCCTTTCGTGGAAGTGTATGCTAAGGATGAGGATGTCTTCTCCGTGACTATGCT  
GTCTCACACAAGAACTTTTCGGAATTAGGATTTACTCCAAGCGGAGGCAAGTCAAGCT  
GCAAAGACAGCACTATACTGGCTCAGAGTGCAGTCGGAGTTTATGTTACTGCAGCAGT  
GGTCATTTGTAGCTACATCTATGAAGTCCGCAAACGCTCAAAGTGA

>SoCAT

ATGGATCCTTACAAGTTTCGGCCATCAAGTGCGAACAACCTCACCATACTGCACCACCA  
ATTCTGGTGCGCCTGTTTGAATAACAACCTCTTCTTAACTGTTGGTAACAGAGGCCCA  
ATTCTTTTGAAGACTATCATCTGGTGGAAAAGCTTGCCAACTTTGACAGAGAGCGTAT  
ACCAGAACGTGTTGTTTCATGCCAGGGGAGCGAGTGCTAAGGGATTTTTTGAAGTTACT  
CATGATATTTACAACCTCACGTGTGCTGATTTCTGCGCGCCCCTGGCGTCCAGACACC  
TGTAATTGTTTCGGTTCTCCACTGTTATTCATGAACGTGGCAGTCCGGAACCATCAGGG  
ACCCTCGTGGTTTTGCTGTGAAGTTCTACACCAGAGAGGGTAACTTCGATCTGGTAGG  
AAACAATTTCCCTGTGTTTTTCATTCGAGATGGTATGAAATTCCTGATATGGTGCATGC  
CCTCAAGCCCAACCCTAAATCTCACATTCAGGAGAATTGGAGGGTCATGGATTTCTTCT  
CGCATCATCCCGAGAGTTTACACATGTTTACTTTCTCTTTGATGATATTGGAGTTCCTG  
CAAACCTATAGGCACATGGAAGGCTCTGGTGTTAACACATATACTCTGGTCAACAAGGCT  
GGCAAAGCATATTATGTGAAGTTCCACTGGAAGCCAACATGTGGAGTGAAGTGCCTGT  
TGGAGGATGAGTGCGTCAAAATTGGTGGAGCTAACCACAGCCATGCTACTCAGGATCT  
TTATGACTCGATTGCAGCTGGAAACTATCCCGAATGGAAGCTGTTTCATCCAGACAATAG  
ACCCAGCTGATGAAGACAAATTTGACTTTGACCCCTTAGATGTTACAAAGACTTGGCC  
TGAGGACATTTTGCCTCTTCAGCCAGTTGGCCGTATGGTCTTGAACAAGAACATTGAC  
AACTTCTTTGCCGAGAACGAGCAGCTGGCATTTTGCCCTGCTATCGTTGTTCTGGGGT  
CCACTACTCAGATGACAAGCTGCTTCAGACTCGAATTTTCTCATATGCTGATACCCAAA  
GACACCGTCTTGACCTAACTACCTGCAACTTCCAGTTAATGCTCCCAAGTGTGCTCAT  
CACAACAACCACTATGATGGTTCCATGAACTTTATGCACAGAGATGAGGAGGTTGACT  
ACTTCCCATCAAGATATGATCCTGTTTCGTCACGCTGAGAGATTTCCCATCCCTACAAAC  
ATCTTGAATGGAAAGCGTGAAAGGCAAATCATTGTAAAGGAAAACAACCTTCAAGCAG  
CCTGGAGAGAGATACAGATCCATGGACCCAGCCAGGCAAGAGAGATTTATATGCAGAG  
TGGTTGATGCTCTCTCTGATCCTCGCATCACTCATGAGATAAGAAGCATTGTTGGTTCAT  
ACTGGTCTCAGGCTGACAAATCTCTGGGTATGAAAGTCGCAAGTCGACTTAATGTGAG  
ACCAACCATGTAA

>SoCAT2

ATGGATCCATCTAAGTACCGCCCGTCAAGTGCTTATAACTCCCCGTACTTAACCAACAA  
TAATGGTACACCTATTTGGAACGATACTTCTGCCTTAACTGTTGGCCCTAGAGGTCCAAT  
TCTGCTGGAGGACTATCACCTGATTGAAAAGATAGCAACCTGGACACATGAGCGGATA  
CCTGAACGTGTTGTACATGCTAGGGGAGCAAGTGCCAAGGGTTTTTTTGAAGTTACTC  
ATGATATCACTAACCTCACTTGTGCTGATTTCTGCGCGCCCCTGGCGTCCAGACGCCT

TGTATTGTCCGATTTTCCACTGTTATTCACGAACGTGGTAGTCCTGAAACACTCAGGGA  
TCCTCGTGGTTTTCGCCATCAAGTTCTACACTAGAGAGGGTAACTTTGATATTGTGGGGA  
ACAACCTCCCAGTGTTTTTACCCGTGATGCAATGCAGTTCTTCGATCTGATCCGAGCA  
TTTAAGCCTAACCCAAAATCCCATATCCAAGAAAGCTGGAGGTACATGGATTTCTGCTC  
TTACCTCCCAGAGAGTCTAAACACCTTCACTTTCTTCTTCGACGATGTGGGAATTCCTA  
TCAATTACAGACACATGAATGGTTCTGGAGTCCACACCTTCACTCTAATCAACAAGGC  
AGGAAAAGTAACATATGTCAAGTTCCATTGGCGTCCAACAGTTGGGGAAAAGAAGCTTG  
CTCGAAGAAGAAGCCATTAAGGTAGGTGGCGCGAACCACAGTCACGCCACACAGGAC  
TTGTATGAGTCTATTGCAAATGGGAATTTCCCAGAATGGAACTCTACATCCAAACCAT  
GGACCTGCTGATGAAGACAAGTTTGATTTTGATCCACTTGATACCACTAAGACATGGC  
CTGAAGATATCTTGCCATTACAGCCTGTAGGACGTCTTGTGTTGAACAAGAATGTCGAT  
AATTTCTTCACTGAAAATGAACAAGTGGCTTTTGATCCTGCACATATTGTTCTGGGATT  
TATTTCTCCAATGATAAGATGCTTCAAGCTCGTACTTTTGTCATATGCTGATACACATAGAT  
ACCGTTTGGGTGTCAACTATTTGCAACTTCCTGTTAATGCTCCTAAGTGTCTCATACCA  
ATATGCACCGCGATGGTGCTATGACCATGATACACAGGGATGAAGAGATTGATTACTTC  
CCATCAAGATTTGATCCTCTTAGGGAAGCTGAGAGACATCCAATTCCAACAGCCATCAT  
ACATGGAAGACGTGAAAAGCAAATCATTCCAAAGGAGAACAAGTCAAGGAGCCAGG  
AGAGAGATACAGATCATGGGACCCAGCAAGGCAAGAGAGATTCAATTGGGAGATTTGTT  
CAAGCTCTATCCGATCCACGACTCACTTATGAGATCCGCAGCATTGTTGGGTGTCATACTT  
GTCTCAGGCGGACAAATCTCTGGGTATGAAAGTAGCAAGTAGGCTCAACGTGAGACCA  
ACCATGTAA

**CDS sequence of SOD, APX and CAT gene family members in *Chenopodium pallidicaule***

>CpCSD1

ATGGGCAAAGCCGTGGTTGTTCTAAGCAGCAGTGAGGGTGTGCTGGTACTGTTTACT  
TCACCCAAGAAGGAGATGGTCCAACAAGTGAAGTGAAGTGTCTCGGGTCTTAAGCC  
TGGGCTCCATGGATTTTCATGTTTCATGCTCTTGGTGACACCACAAATGGCTGCATGTCAA  
CTGGACCACACTTTAACCCAAATGGAAGAGCATGGAGCTCCCGAAGACGAAGTTC  
GCCACGCTGGTGATCTTGGAACATCACAGTTGGGGATGATGGTACCGCTACCTTTACC  
ATCATTGATAACCAGATACCTCTTTCTGGTCCCAATTCTATTGTGGGGAGGGCTGTTGTT  
GTCCATGCTGATCCCGATGATCTTGGAAGGGGTGGACATGAACTCAGCAAGACCACAG  
GCAATGCTGGTGGAAGAATCGCTTGTGGTATTATTGGTCTTCAAGGTAA

>CpCSD3

ATGAGCACAGTGAAAGGAGTGGCAGTCATCTCCGGCGCCAATAACACCATCAACGGCT  
CTCTCCACTTCATCCAAACCTCCACAGGGATAACTCATGTTAAAGGAAGAATTACAGGC  
CTCACTCCTGGTCTTCATGGCTTCCATATTCATTCTCTTGGTGATACCACTAATGGTTGC  
AACTCCACTGGGCCTCATTTTAATCCGTTAAAGAAGGATCATGGAGCTCCATTTGATTC  
AGAGAGACATGCGGGTGATCTGGGAAACATTGTTGCAAACAGGGATGGGGTTGCTGA  
GGTTTCAATTATTGATTCCCAGATACCACTTAGTGGGCAACACTCAATTCTTGGGAGGG  
CTGTTGTGGTGATGCTGATCCAGATGATCTAGGAAGAGGTGGACATGAACTCAGCAA  
AACAAACAGGGAATGCCGGTGCTAGAGTAGGATGCGGTGTAATTGGGCTGCAATCGTCT  
GTATAG

>CpCSD2

ATGGCCGCACACACCATCCTTGATCTGCACCTTCTCATCCCACATTCTCTCTCCTCTCT  
CCTTTCTCTTCTCACCCACTACTTCTTCTCCTACCACCCTTTTCATCTTCTCTTAAATCTT

CTTCCTTCAATGGTGTCTCTTTCAAGCTTTCTTCCCACACTCAATCCCTCTCTCTTTCCG  
CTTCCGCTTCCGCCACCTTCAAACCTCTCACCATTGTTGCTGCTACCAAAAAAGCTGTT  
GCTGTTCTAAAGGGTACTTCCAATGTTGAGGGTGTGTTACTTTGACCCAGGAAGATGA  
TGGTCCAACACTACAGTCAATGTTTCGTATTACTGGACTTACTCCGGGGAAGCATGGATTTC  
ACTTGCATGAGTTTGGAGATACAACAAATGGGTGCATGTCTACAGGTCCACATTTTAAT  
CCTAATAAAATGACACATGGTGCTCCGGAAGATGAAGTCCGGCATGCGGGTGACCTGG  
GAAACATTGTTGCTAACACAGATGGAGTGGCTGAGGCTACCATTGTTGATAATCAGATT  
CCATTGACTGGACCAAATTCAGTTGTCTGGTAGAGCCCTTGTGGTACATGAACTAGAGG  
ATGACCTTGGAAGGGTGGACATGAACTTAGTCTGACCACTGGGAATGCTGGTGGAAG  
ATTGGCTTGTGTTCTATTTGGTTTTGTAA

>CpCSD4

ATGACGATTCTGAGGTCAATAGTCACAACAACAACCGCCATAGCAGCCACAGCTCTGC  
CTGCTGCGTACGTCGCATCTTCTCTCTCCTCTTCATCTTCTTCACCATCTTCATCTTCTTC  
TCCCTTCTCGAAGTCTCTGGACTTCCGCTTTCTCTCTCCTCAAGCACCATCGACTTCGG  
GGGTTGCTGCTAGATTCCGGCCTTATCAAGAGTTTCAGCTCTCCGCCTTCTGCTGTTCAA  
ATGGAGAATCCTAAGTCTTCTTCATGAAGATTGAAGTTGCCTGACTTAATGACAGA  
ATTTATGGTGGATATGAAGTGTGAAGGTTGTGTTAGTGCTGTCAAGAGTAACTAGAGA  
CTCTATATGGAGTTAAGAGTGTGAAGTAGACTTGAGCAATCAAGTTGTTAGGATTCTT  
GGTTCTTCACCTGTGGTATCTATGGAAAATGCTTTGGAGCAAACCTGGACGTAAAGCAC  
GATTGATTGGTCAAGGAGTACCAGAAGTTGCCGAGTTTAAAGGTCCAGATATTTTTGGT  
GTGGTTCGTTTTGCCAGACACACATGGAGTTGGCCAGAATCGAGGCCAATATCAGTG  
GGTTGCCACCTGGGAAACATGGCTGGTCTATAAATGAGTTTGGTGATCTGACTAAAGGT  
CCAGTCAGCACGGGGAAAGTGTACAAGCCACCAATCCAAGGAAGTGAAAGTGAGCCA  
CTGGGTGACCTGGGAACATTAGAAGTTGATGAGAAAGGCGAAGCTTATTATTCAGGAA  
TCAAGAAGATGCTGAGGGTTGTTGATTTAATTGGACGGTCCATTGTCTTGACGCATCT  
GAGGACAAGACTGATCCTGGCCTTACAGCTGCAGTGATTGCTAGGAGTGCGGGAGTAG  
GTGAGAACTATAAGAAGCTTTGTACATGCGATGGAACCACGATCTGGGAAGCAAAGCC  
TGATATTGTCACTAGCAAAGTCTGA

>CpMSD1

ATGGCGCTTCGAACTCTGATGACCAGGAAAACCCTAGCTTCTGCATCTTCAAACCAAG  
GTCTTCTTCATCAATGTCGATCGTTGCAGACTTTCTCTCTCCCTGACCTTCCGTACGACT  
ATGGCGCTCTTGAGCCTGCCATTAGCGCCGAAATCATGCAGCTTCACCATCAGAAGCAT  
CACCAGACTTACATCACTAACTATAACAAAGCTCTTGAGCAGCTCGATGATGCTATTGC  
TAAAGGCGATGCTTCTAGTGTTGTTAAGCTTCAAAGCGCCATTAAATTCAATGGCGGAG  
GTCATGTGAATCACTCAATTTTCTGGAAGAATCTTGCTCCAATTAGTGAAGGAGGTGGT  
GAGCCTCCAAAAGCTTCACTGGGTTGGGCAATTGATTCAAACCTTGGCTCTCTGGAAG  
CTCTTATCCAGAAAATGAATGCGGAAGGAGCTGCCTTACAAGGTTCTGGATGGGTGTG  
GCTTGGACTTGACACACAATCCAAGAAGCTTCTTGTTGAAACCACTCCAAATCAGGAC  
CCTCTGGTAACTAAAGGACCAAGTTTGGTTCCTATACTTGGTATAGACGTATGGGAGCA  
TGGCTACTACCTGCAGTACAAGAATGTGAGACCTGATTATCTGAAGAACATCTGGAAG  
ATTATGAACTGGAACATGCAAGCGAGGTGTATGAAAAAGAATGCCCCAGCCACTAA

>CpFSD2

ATGGGAAGTTTTACTGCAATTACGCCTGTTAGCTCATCTCTTCATGCCAATGACTTGTCG  
TTCAGGATTAAAAATTTTATCCTTAATTATCAGCAGAAAAGAAGACATGAAGGACCGAG

AAGAAAGTCCGGTGTGTTGCATATTATGGGCTTAAAAAGCCTCCTTATAACCTTGATG  
CACTAGAACCATATATGAGCCAGAAAACCTCTGGAGTCACATTGGGGAGAGCATCATAA  
AGGTTACCTGGATGCTTTGAATAGACATTTGAGTAAGAGTGATATACTATATGGCTATAC  
TATGGATGAACTTGTGAAAGTAACGTACAATTATGGAAACCCCTTACCCGAATTCAATG  
ATGCTGCACAGGTCTGGAATCACGACTTTTTCTGGGAATCCATGCAACCTGGAGGTGG  
GGAGTCTCCAACACTCGGTCTACTTCAGCAGATTGAAAAAGATTTTGGTTCTTTTCCAA  
ACTTTAAAGAGAAATTTATAGAAGCAGCTATGACACTCTTTGGTTCTGGTTGGGTTTGG  
CTGGTTTTGAAGAAGAAGGAGAAGCAACTTGCAGTGGTTAAGACATCAAATGCAGTC  
ACTCCTATTGTCTGGGATGATATCCCCATCTTATGCTTGGATGTGTGGGAGCATGCTTAC  
TACTTGGATTATAAGAATGATAAAGCGAAGTATGTAAATGTGTTTATGGACCACCTTGTA  
TCATGGCATGCTGCAACAGCACGCCTTGCTCGGGCACAGGCCTTTGTGAATCTTGGAG  
AACCTAAAATTCCAGTTGCTTAA

>CpFSD1

ATGTCCGCAATTGCTGCAACTTCCTCAATTTACCATCTTCCTCAATTTTCACTCATGAA  
GTGATTTTTGCAGGGTTTAAAGGGGGCCTAAACACTATCCGCTTCTCACCTTGGAAAGCT  
TAAGGAAACAAGAGTAAGAAGAGCCGGTGCTGGTGTGTTACAGCCAAGTTTGACTT  
GAAGCCCCCACCTTATCCATTTGATGCCTTGGAGCCGCATATGAGCAAACAGACGTTTG  
AGTATCATTGGGGGAAGCATCATAGAGCATATGTGGATAACTTAAACAAGCAAATAGTT  
GGAACAGAATTAGATGGATTGCCACTTGAAGAAGTCGTACGAATCACATATAACAAAG  
GGGACATGCTTCCTTCTTTTAATAATGCAGCACAGGCCTGGAACCATGAAATCTTTTGG  
GAGTCCATGAAGCCTGGTGGTGGGGGAAAGCCTTCTGGCGAGCTTTTGGCACAGATTG  
AAAAGGATTTTGGTTCATTTGAAGCATTTACTAATGAATCAAGACTGCTGCTGCCACA  
CAATTTGGTTCTGGCTGGGCTTGGCTTGTTTACAAAGCAAATAAATTGGATGTGGGAAA  
TGCAGTAAACCCAAAACCATCTGAAGATGACAAGAAGCTTGTGGTTGTTAAGAGCCCA  
AATGCTGTGAACCCTCTTGTGTTGGGATTATTATCCGCTTCTTACTATCGATGTTTGGGAG  
CATGCATATTACTTGGACTTCCAGAATCGAAGGCCTGATTACATCTCAATTTTCATGGAA  
AATCTTGTTCCTGGGATGCTGTCAATGCAAGATATGAGGCTGCTAAGTCTCTTGCTAC  
GGAGAGAGAGAAAGAAGCAGTGCAGAAATTA

>CpAPX10a

ATGGCAGCCACAACAAAGAGCGTAGTTGATGTAGATTATCTGAAACAAATTGAGGGTG  
CTCGTAAAGATCTTCTTGATCTTCTTCAGAAGAACAAGAATTTTTCACCCATTGTGCTT  
CGTTTAGCATTTTATGATGCAGGAACTTACGATGCTAAAACGAAGACAGGTGGTCCAA  
ATGGTTTCGATTAGACGTGAGTTGAGCAACCCTCCTAACAATGGTATCAAAGTTGCTGTT  
GATTTTTGCGAGCAAGTGAAAGCTAAATACCCCAAGGTTACTTATGCTGACTTTTACCA  
GCTTGCTGGTGTGCTTGCGGTTGAAGTAACCGGAGGTCCTAAAATCCCATTATTCCCG  
GTCGTCTGATGCTAGGGATCAACAAGACAGTGGTGTCTTCCAAATCCCAATGGAGA  
TGCCAAACATCTAAGAGACATATTTTACCGTATGGGTTTGAACGATAGAGATATCGTGG  
TCTTATCGGGGGCTCACACACTGGGTCGAGCAAACAATGATAGATCTGGCTTTGATGGT  
CCTTTCACAGAGGACCCTTTCAAATTCGACAATTCCTATTATGTAACTTGAGGAAGGA  
AGACAAACCTGGACTGGTGAAATTTCCCACTGACAAAGTTCTCGTCGAGGACCCTGCT  
TTTAGCAAATATGTTCAATTGTATGCCAAGGATGAACAAGCTTTCTTCGCACACTATGCT  
GAATCACACAAGAAGATGTCGGAGCTCGGGTTTACCCACCCAGCCCTGGTGCTAAAG  
CTTGA

>CpAPX10b



ATGGCACATCAACAACAATCGCGAGCAGGGCACATTGTGGATGCCCCAATACTTGAAAC  
AAATTGAAGGAGCTCGTAGAGACCTTCATCATCTTCTTCAAAATAACAAGAAATTTGCA  
CCCATTGTGCTTCGATTAGCATTTCATGATGCAGGTACTTATGATGCCAAAACAAAAAC  
TGGAGGTGTAAATGGCTCAATTAGGAATGAGTTGAACAACCCTCCCAACGGCGGTATT  
AAGAATGCTATTGATTTTTGTGAACAAGTGAAGATCAAACACCCCCAAAGTCACATATGC  
TGACCTTTACCAGCTTGCTGGTGTGTTGCTGTTGAAGTTACCGGAGGTCCTGTTATTC  
CTTTTATCCCTGGTCGACCGGATGCCGTGGATCAACAAGACCGCGGAGACCTTCCAAA  
TCCTAATGGAGGTTCCCAAGCATCTGAAGGATATATTTTATCGAATGGGCTTGAACAATAG  
GGATATTGTTGTTCTATCTGGAGCTCACACACAGGGTCGAGCACACAAGGATATATCGG  
GTTTTGATGGTCCTTTCACCAAAGATCCTTTGAAATTTGACAATTCCTATTATGTAAACT  
TGAGGAAGGGTGAAACTCCTGGACTGGTGCAATTCCTACAGACAAAGTTCTTGCCGA  
GGACCCTGATTTCCGTAAATATGTTCAACTGTATGCTAAGGATGAAAAGGTCTTCTTTG  
CACACTACGCGGACTCACACAAGAAGATGTCAGAGCTCGGGTTTCACCCAGGGCACC  
CATGCTGCCACTCTAAGAAAGCCTGA

>CpAPX10c

ATGTCGGATCCTTTATCAATGGCGTCATCCTTCTCTTCCACCGCCTCCGCCGCCGCCGCC  
GCCGCCGCTGCAACCGCCGCTTCTCGTCTTCTTCTCCGACTTCTATCTCTCGTCTTTCT  
CTCTCCCCCTTCTTCTTCTTCTCGTCTTCCTTCAAATGTCTCCGATCATCTCCGCTTGTTT  
CTCACCTTTTTCTGAGATAGAGAGAAGGTTTCGGTTTATGTGACGAAGTCGAGGTTTAGT  
ACGAAGTGTTATGCTTATGCTTCGGATCCTGCGCAGTTGAAGAATGCTAGGGAGGATAT  
TAAAGAGCTTCTTCAGACTAAGTTTTGTATCCGATTATGGTGCGCTTAGGTTGGCATG  
ATGCTGGTACTTATAATAAGGATATTAAAGAATGGCCACAGAGAGGTGGAGCCAATGGC  
AGTCTGAGGTTTGAGGCTGAACTCAAACACGGAGCTAATGCAGGTCTTATAAATGCAT  
TGAAACTTCTCCAGCCCATAAAAGACAAGTACTCTGGAGTGACATATGCAGATCTATTC  
CAGTTGGCTAGTGCTACTGCAATAGAGGAGGCTGGTGGTCCTAAGATACCAATGAAGT  
ATGGAAGAGTGATGTGACAGGTCCAGAGCAGTGCCCAGAAGAAGGAAGGCTTCCTG  
ATGCTGGACCTCCTTCACCTGCTCAACATCTACGTGATGTTTTCTACAGAATGGGCTTG  
AATGATAAGGATATAGTAGCATTATCTGGAGCACATACATTGGGAAGGTCTAGACCTGA  
GCGCAGTGGTTGGGGCAAACCAGAGACTAAATACACGAAAGATGGACCGGGAGCTCC  
AGGAGGGCAGTCCTGGACTGTGCAGTGGTTGAAGTTTGATAATTCCTATTTTAAGGAC  
ATCAAAGAGAAGAGAGATGCAGATTTGCTTGTTTTGCCAACTGATGCTGCTCTTTTTGA  
AGATCCATCTTTCAAGGTATATGCTGAGAAATACGCAGCTGATCAGGATGCATTTTTCA  
AGGATTATGCTGAATCCCATGCCAAGCTGAGCAACCAAGGAGCCAAATTTGACCCCTC  
TGAGGGTTTCTCTCTTGATGGAAGTCCAGCTGGAGCAGCGCCAGAGAAGTTTGAAGC  
AGCCAAGTACTCATCTAACAAGGTTTGAGAGCTATCGGACTCCATGAAGCAAAAGATC  
CGCGCTGAATACGAAGGTTTTGGTGGTAGCCCTGATAAGCCTCTCCCAACAACTACTT  
CCTAAACATTATGGTTGTGATTGGAGTTTTGGCAATTCTATCATATCTTGCAGGAAATTG  
A

>CpAPX10d

ATGGCAGCCACAACAAAGAGCGTAGTTGATGTAGATTATCTGAAACAAATTGAGGGTG  
CTCGTAAAGATCTTCTTGATCTTCTTCAGAAGAACAAGAATTTTTCACCCATTGTGCTT  
CGTTTAGCATTTTCATGATGCAGGAACTTACGATGCTAAAACGAAGACAGGTGGTCCAA  
ATGGTTTCGATTAGACGTGAGTTGAGCAACCCTCCTAACAATGGTATCAAAGTTGCTGTT  
GATTTTTGCGAGCAAGTGAAAGCTAAATACCCCAAGGTTACTTATGCTGACTTTTACCA

GCTTGCTGGTGTGCTTGCGGTTGAAGTAACCGGAGGTCCTAAAATCCCATTATTCCCG  
GTCGTCCTGATGCTAGGGATCAACAAGACAGTGGTGCTCTTCCAAATCCCAATGGAGA  
TGCCAAACATCTAAGAGACATATTTTACCGTATGGGTTTGAACGATAGAGATATCGTGG  
TCTTATCGGGGGCTCACACACTGGGTCGAGCAAACAATGATAGATCTGGCTTTGATGGT  
CCTTTCACAGAGGACCCTTTCAAATTCGACAATTCCTATTATGTAACTTGAGGAAGGA  
AGACAAACCTGGACTGGTGAAATTTCCCACTGACAAAGTTCTCGTCGAGGACCCTGCT  
TTTAGCAAATATGTTCAATTGTATGCCAAGGATGAACAAGCTTTCTTCGCACACTATGCT  
GAATCACACAAGAAGATGTCGGAGCTCGGGTTTCACCCACCCAGCCCTGGTGCTAAAG  
CTTGA

>CpAPX1

ATGGGAAAGAGCTACCCAACCGTCAGTGAGGATTACCAGAAATCTATTGAAAAGGCCA  
AGAGGAAGCTCAGGGCTTTGATTGCAGAGAAGCAGTGTGCTCCTCTTATGCTCCGTCT  
TGCATGGCACTCTGCTGGTACCTTTGATGTGAACTCAAAGACTGGAGGACCCTTTCGGT  
ACAATTAGGCACCAGGCAGAGCTGGCTCATGGGGCTAACAATGGGCTTGACATTGCCG  
TTAGGTTGTTGGAACCCCTCAAGGAACAATTCCCCGAAATTTCTTACGCTGACTTTTAT  
CAGTTGGCTGGTGTGTGGCTGTTGAAGTCACTGGAGGACCTGAAATTCCTTCCACC  
CAGGCAGAGAGGACAAGCCAGAGCCACCCCAGGAAGGCCGACTCCCTGATGCCACC  
AAGGGTTGTGACCATTAAAGAGATGTCTTCATCAAGCAAATGGGTCTAACTGACCAGG  
ACATTGTTGCTCTCTCTGGAGGCCACACCTTGGGGAGGTGCCACAAGGAACGCTCTGG  
GTTTGAGGGAGCTTGGACTGCCAACCCCTTTGGTCTTCGACAATTCTTATTTCAAGGAGC  
TCCTGAGTGGTGAGAAGGAAGGTCTCTTGACGCTTCCATCTGACAAGGCTCTTCTCTC  
TGACCCTGTCTTCCGCCCCTGGTTGAGAAATATGCAGCTGATGAGGATGCATTCTTTG  
CCGACTATGCTGAGGCGCACCTGAAACTTTCTGAACTTGGATTTGCCGATGCTTAA

>CpAPX6

ATGACCACCTCCGGCGGCGAATCGTCGATTTTCCGCGGCTGCTTAGCCACCCAAAAAT  
CATCAAATCCCCTCAATAAATTCAAATTTCCCGCCAAAACTTCGCCGTTAACCGTCCAA  
TTCGGCGCCAAAGTAGCTCCCTTTCTCTCTCCTCCCTCTGCTCTTCCACCCACTTCAGA  
TGGTTATGGCAATCTCGGCTCGTGTGGGAGGAGAGGACTCATTTTCCTTTCTGTCACTC  
TACCTTCTTTATTCCCTTTGCAAGAATATGTCAAAGATTTCAATGCTGAAGCAGAAGAG  
CTGGGAGCTCCTGATTACCAACTTATGAAGGATGAGATAAGGAAGGTTTTGTCCAAAG  
GAAAGGCTGCTGGTGTACTTCGTCTCGTGTTCATGATGCAGGAACCTTTGAGCTCAGT  
GAGAATTCAGGAGGTATGAATGGCTCTATAACATACGAACTTGAAAGGCCTGAGAATA  
AAGGGTTAAAAAAGTCTCTAAAGATCATTGAGAAAGCCAAAAATGTAGTGGATGAGA  
GGCAATCAGTGTCTTGGGCAGACATGATTGCTGTAGCAGGAGCTGAGGCAGTCTCAAT  
TTGTGGAGGTCCGGATATTCCAGTTCGTTTGGGAAGACTTGATTTCGCTGACTCCAGATC  
CTGAAGAAAACTACCCGAGGAATCACTGGATGCACCAAGCTTAAAACAGTGCTTTCA  
AAGAAAGGGCTTTTCCACACAAGAACTTGTTGCCCTTTCTGGGGCGCATACTCTTGGA  
AGTAAAGGTTTTTGAAGCCCCATCGTATTTGACAATTCATACTACAAAATTCTCCTTGA  
GAAACCATGGCTGTTGTCAGCTGGAATGTCAAGTATGGTTGGACTTCCTTCAGATCGTG  
CATTAGTAGAGGATGATGAATGCTTAAGGTGGATTACAAATTACGCGAATGACCAAGAT  
TTATTTTTTTGAGGATTTTAAGAATGTCTATATCAAGTTAGTCAATTCGGGTGTAAGGTGG  
AAATCTTCTTGA

>CpAPX1a

ATGGGAAAGAGCTACCCAACCGTCAGTGAGGATTACCAGAAATCTATTGAAAAGGCCA

AGAGGAAGCTCAGGGCTTTGATTGCAGAGAAGCAGTGTGCTCCTCTTATGCTCCGTCT  
TGCATGGCACTCTGCTGGTACCTTTGATGTGAACTCAAAGACTGGAGGACCTTTCCGT  
ACAATTAGGCACCAGGCAGAGCTGGCTCATGGGGCTAACAATGGGCTTGACATTGCCG  
TTAGTTGTTGGAACCCCTCAAGGAACAATCCCCGAAATTTCTTACGCTGACTTTTAT  
CAGTTGGCTGGTGTGTGGCTGTTGAAGTCACTGGAGGACCTGAAATTCCCTTCCACC  
CAGGCAGAGAGGACAAGCCAGAGCCACCCCAGGAAGGCCGACTCCCTGATGCCACC  
AAGGGTTGTGACCATTTAAGAGATGTCTTCATCAAGCAAATGGGTCTAACTGACCAGG  
ACATTGTTGCTCTCTCTGGAGGCCACACCTTGGGGAGGTGCCACAAGGAACGCTCTGG  
GTTTGAGGGAGCTTGGAAGTCCAAACCCCTTTGGTCTTCGACAATTCTTATTTCAAGGAGC  
TCCTGAGTGGTGAGAAGGAAGGTCTCTTGACAGCTTCCATCTGACAAGGCTCTTCTCTC  
TGACCCTGTCTTCCGCCCCACTGGTTGAGAAATATGCAGCTGTATGTTCTTCCTGA

>CpAPX3

ATGGCGATGCCGGTCGTCGACACAGAATACCTCAAGGAAGTCGACAAAGCTCGTCGC  
GATCTTCGCGCTCTCATCTCTGGCCGCAACTGCGCTCCTATCATGCTCCGCCTAGCGTG  
GCATGATGCTGGGACCTATTGCGCGAAGACGAAGACCGGTGGTCCGAATGGTTCGATT  
AGGAATGAGGAAGAGTGCCTCATGCTGCCAATAGTGGTTTGAAGAAAGCTGTTGATT  
GGTGTGAGGAGGTGAAGGCTAAACACCCAAAGATTACATATGCAGACCTCTATCAGCT  
TGCTGGTGTGTTGCAGTTGAGGTCACTGGAGGACCTACAATTGACTTTGTTCTCTGGTA  
GAAAGGACTCAAGTGTGTGTCCCAAGGAAGGGCGACTTCCAGATGCCAAACAAGGTG  
CACCACATCTGAGGGACATATTTACAGGATGGGTCTTTCTGACAAAGACATTGTGGCC  
CTATCTGGGGCTCATAACCTGGGAAGGGCACATCCAGAGAGATCAGGCTTTGATGGCC  
CGTGGACCCAGGAGCCACTCAAGTTTGATAACTCCTATTTTGTGGAGCTTTTGAAAGG  
AGAATCAGAGGGACTGTTGAAACTTCCTACTGATACAACTTTGGTGGAGGATCCTGCA  
TTTCGCCCTTTTGTGGAATTGTATGCTAAGGATGAGGATGCCTTCTTCCGTGACTATGCA  
GCCTCGCACAAGAACTTTACAGATTAGGATTCCTCAAGCGGGGCCAAGTCATGCT  
GCCCCGACCACTGTACTGGCTCAGAGTGCAGTTGGAATTGCAGTTGCTGCGGCAGT  
GGTCATCTGTAGCTACATCTATGAAATTTCGCAAACGCGCAAAGTAA

>CpAPX9

ATGCTAGGACGAGAAAAAAACAGTTGGTGGATGGCGAATATTTGAAGGAAATTGAG  
AGAGCTCGAAGAGACCTCCGCGCTCTCATCTCTGCCAACCATTGTGCTCCTAGTGTGCT  
TCGATTAGCATGGCATGATGCAGGTACATATGATGCAAAGACGAAAACGGGAGGCCCCG  
AATGGCTCAATCAGAACCAAGGACGAAATGGAGCACAGAGCCAACCGTGGCCTCAA  
ACAGCTGTTGCTCTTTGTGAAGAAATAAAGGTTAAACACCCAAAGATCACTTATGCGG  
ATCTTTATCAGCTTGCTGGAGTTGTTGCAGTTGAAGTCACAGGCGGTCCAACCATCGAC  
TTTGTTCCTGGACGAGTGGACTCCACGGAATCTCCAGAGGAAGGACGCCTTCCTAATG  
CAGATTTGGGTGCTGAACATTTGAGAGAAGTATTTACAGAATGGGATTTACTGACAAG  
GATATTGTCGCGTTATCAGGAGGCCACACACTGGGTGAGGCGCATAAGGAAACATCAG  
GTTACGAAGGTCCTTGGACTAAAGACCCAATGAAATTCGACAATTCCTATTATGTAGAG  
TTGTTGAATGGTGAACGACGAGGGTTATTGAACTTCCTACTGATAAGGCTCTTGTAGA  
GGATCCTAGATTTGACGCTATGTTGAGCTCTATGCTAAGGATGAAGACGCGTTCTTTA  
GAGATTATGCAGAATCACACAAGAAGCTCTCAGAGTTAGGGTTCAATCCACCCATGCC  
TTGGAGAAAGATTGTTTCCAAGGCTGCACTTGGTGTAATTGTCTCTGTTACTGTAATCA  
TCTTGATGAATTAACAAGAATGAATAG

>CpAPX10c

ATGGCAGCTACCACAAAGAGCGTTGTTGATGTAGATTATCTGAAACAAATTGAGGGTG  
CTCGTAAAGATCTTCATGATCTTCTTCAGAAGAACAAGAAGTTCTCTCCCATTCTGCTT  
CGCTTAGCATTTTCATGATGCAGGTACTTATGACGCTAAAACGAAGACAGGGGGTCCAA  
ATGGTTCAATTAGACGTGAGTTGAGCAACCCTCCCAACAATGGTCTCAAAGTTGCTATT  
GATTTTTGCGAACAAGTGAAATCTAAATACCCCAAGATTACTTATGCTGACTTTTACCA  
GCTTGCTGGTGTCTCGCGATTGAAGTAACCGGAGGACCTAAAATCCCCTTTACTCCAG  
GTCGTCTGATTCTAGGGATCAACAAGACGGTGGTGTCTCTTCCAAATCCTAATGGAGAT  
GCCAAACATCTAAGAGATGTATTTAATCGAATGGGTTTTAAGGATAGGGATATCGTGGT  
CTTATCGGGGGCTCACACATTGGGCGGAGCAAACAGAGATAGATCTGGCTTTGATGGT  
CCTTTCACGGAGGAACCTTTCAAATTCGACAATTCCTATTTTGTAACCTTGAGGAAGGC  
TGACAAACCTGGATTGGTGAAATTTCCACGGACAAAGTTCTCGTCGAGGATCCTGCT  
TTTAATAAATATGTTTCAGCTATATGCCAAGGATGAAAAAGCTTTCTTTGCGCACTATGCT  
GAATCACACAAGAAGATGTCGGAGCTCGGGTTTTACCCACCCAGCCCTGGTGCTAAAG  
CTTGA

>CpCAT1

ATGGATCCTTACAAGTTTCGGCCATCAAGTGCGCACAATTCATCACACTTCACCACAAA  
TTCTGGTGCTCCTGTTTGGAACAACAACCTCTTCTTTGACTGTTGGCAACAGAGGCCCC  
ATTCTTTTGAGGACTATCATCTTGTGGAAAAGCTTGCTAACTTTGACCGAGAGCGTAT  
ACCAGAACGTGTTGTTTCATGCCAGGGGAGCGAGTGCTAAGGGATTTTTTGAAGTTACT  
CATGATATTACACACCTCACATGTGCTGATTTCCTGCGTGCTCCTGGTGTCCAGACACC  
TGTGATTGTTTCGGTTCTCTACTGTTATTCATGAACGTGGGAGTCCTGAAACCCTCAGGG  
ACCCTCGTGGTTTTTGCTGTGAAGTTTTACACCAGAGAGGGTAACTTCGATCTAGTGGG  
GAACAATTTCCCTGTGTTTTTCATTCGTGATGGTATGAAATTCCTGATATGGTGCATTC  
CCTCAAGCCCAATCCTAAAACCCACATTCAAGAGAACTGGAGGGTCATGGATTTCTTC  
TCTACCATCCCGAGAGTTTACACATGTTCACTTTCCTCTTTGACGATGTGGGTGTTTCCT  
GCAAACCTACAGACACATGGAAGGCTCTGGTGTTAACACATATACTCTGGTCAACAAGG  
CTGGCAAAGCATACTATGTGAAGTTCCACTGGAAGCCAACATGTGGAGTTAAGTGTCT  
GTTGGAGGATGAATGCGTCAAAGTTGGAGGAGCTAACCACAGCCATGCTACTCAGGAT  
CTTACTGACTCAATTGCAGCTGGAAACTATCCTGAATGGAAGCTGTTTATCCAGACAAT  
TGACCCTGCTGATGAAGATAAATTTGACTTTGACCCCCCTAGATGTTACCAAAACATGGC  
CTGAGGACATTTTGCCTCTTCAGCCAGTGGGTGCTATGGTCTTGAACAAGAACATTGA  
CAACTTCTTTGCTGAAAATGAGCAGCTGGCTTTTTGCCCCTGCTATTGTTGTTCTGGGG  
TCCACTACTCAGATGACAAGCTGCTTCAGACTCGAATTTTCTCATATGCTGATACCCAA  
AGGCATCGTCTTGGTCCCAACTACCTGCAACTTCAGTCAACGCTCCCAAGTGTGCTC  
ATCACAACAATCACTATGATGGTTCCATGAACTTTATGCACAGAGATGAGGAGGTGGAC  
TACTTTCCATCAAGATATGATCCCGTTCGTCATGCTGAGAGATACCCCATTCCTGCAAAT  
ATTTTGAATGGAAGGCGTGAAAGGCAAATCATTGCAAAGGAAAACAACTTTAAGCAG  
CCTGGAGAGCGATACAGATCAATGGACCCAGCCAGGCAAGAGAGATTTATCTGCAGAG  
TGGTTGATGCTTTAAGCGACCCTCGTGTCACCCATGAGATACGCAGTATCTGGGTTTCA  
TACTGGACCCAGGCTGACAAATCTCTGGGTATGAAAGTTGCAAGCCGACTTAATGTGA  
GACCAACCATGTAA

>CpCAT2

ATGGATCCATCTAAGGTTTCGGCCAGCAAGTGCTTACAACGCCCCGTACTTGACTACCAA  
TAATGGTACACCCGTTTGGAACGATACCTCAGCGTTAACTGTTGGCCCTAGAGGTCCAA

TTCTGTTGGAGGATTATCATCTAATTGAAAAGATAGCAACTTGGACACATGAACGGATA  
CCTGAACGTGTTGTACATGCTAGGGGAGCAAGTGCTAAGGGTTTTTTTGAAGTTACCC  
ATGATATCACTCACCTCACTTGTGCTGATTTCCTCCGTGCCCCCGGTGTCCAGACCCCT  
GTTATTGTTTCGATTTTCCACGGTCATTCATGAACGTGGTAGTCCTGAAACACTCAGAGA  
CCCTCGTGGTTTTCGCCGTCAAGTTCTATACTAGAGAGGGTAACTTTGATATTGTGGGAA  
ACAAC TTCCCGGTGTTTTTCACCCGTGATGCAATGCAATTCTTCGACCTGATCCGAGCA  
TTTAAGCCCAACCCCAAATCTCACATCCAAGAGAGTTGGAGGTACATGGACTTCTGCT  
CATACCTCCCTGAGTCTCTCAACACCTTCACCTTCTTCTTCGATGATGTGGGCATCCCCG  
ATCAATTACAGACACATGAATGGCTCCGGAGTCCACACCTTCACTCTCATCAACAAAG  
CAGGGAAAGTAACATATGTCAAGTTCCATTGGCGCCCAACTTGCGGCGAAAAGAATTT  
GCTCGAGGAGGAGGCCATCAGGGTTGGTGGCTCGAACCACAGCCACGCGACTCAGGA  
CTTGACGAGTCTATTGCTAATGGGAACTTCCCTGAGTGGAAGCTCTACATCCAAACCA  
TGGACCCTGCTGATGAGGATAAGTTTGATTTTCGATCCACTCGATACTACTAAAACCTTGG  
CCTGAGGATATCCTGCCCTTACAGCCTGTAGGACGTCTTGTGTTGAACAAAAATGTTGA  
CAACTTCTTTACAGAAAATGAGCAGCTGGCTTTTGATCCTGCTCATATTGTTCCCTGGGA  
TTTACTTCTCTAATGATAAGATGCTTCAGGCTCGAACTTTTGCCTATGCCGATACCCATA  
GATATCGTTTTGGGTGTCAACTACTTGCAGCTTCCTGTTAATGCTCCTAAGTGCCCTCATA  
CCAACATGCACCGCGATGGTGCTATGACTATGGTGCACAGGGATGAAGAGGTTGATTAT  
TTCCCATCAAGATTTGATCCTCTAAGAGAAGCCGAGAGACACCCTATTCCAACGGCAAT  
CATACATGGAAGGCGTGAAAAGCAAATCATACCAAAGGAGAACAACCTTCAAGGAGCC  
AGGAGTGAGATATAGATCATGGGATCCAGCCAGGCAAGAGAGATTTCATTGCGAGATTT  
GTTCAAGCTCTGTCTGATCCACGCCTCACATATGAGATACGCAGCATTTGGGTTTCATAC  
CTGTCTCAGGCGGATAAATCATTGGGCATGAAAGTAGCAAGCAGGCTCAATATAAGAC  
CAACCATGTAA

**CDS sequence of SOD, APX and CAT gene family members in *Silene uniflora***

>SuMSD1

ATGGCGCTTCGATCAATCTTAACCAGGAAAACCTTAGCTTCATCTGCAACTTCACCTCT  
CCAATGGCGTTCCCTGACTACCTTCACTCTCCCTGACCTTCCCTACGATTACGGCGCAC  
TTGAGCCCGCCATTGATGGTCAGATCATGCAGATTCACCACCAGAAACATCATCAGACT  
TACGTCACTAACTACAACAAGGCTCTTGAGCAGCTTCATGATGCGTCCGAGAAAGGCG  
ATGCTTCTGCTGTTGTTAAGCTTCAAAGCGCCATTAAATTCAATGGCGGAGGTCATATC  
AATCACTCAATTTTCTGGAAGAACCTAGCTCCAATTAAGGAAGGAGGTGGTGAGCCTC  
CAAAAGGCTCTCTGGGTGGGCTATTGACTCAAATTTGGCTCTGTTGAAGCTCTTATT  
CAGAAAATGAACGCCGAAGGAGCTGCCTTGCAAGGTTCTGGTTGGGTGTGGCTAGGA  
CTTGACAAGGAGTTGAAAAGGCTTGTGGTTGAAACGACTGGTAATCAGGATCCACTGG  
TAACTAAAGGGGCAACTTTGGTTCCTTTACTTGGTATAGATGTCTGGGAGCATGCCTAC  
TACTTACAGTACAAGAATGTGAGACCTGATTATCTGAAGAACATATGGAAGGTTATGAA  
CTGGAAATATGCCAGTGATGTTTACGAGAAAGAGTGTCTAGCCCCCTAA

>SuMSD2

ATGGCGCTTCGATCAATCTTAACCAGGAAAACCTTAGCTTCATCTGCAATTTACCTCT  
CCAATGCCGTTCCCTGACTACCTTCACTCTCCCTGACCTTCCCTACGATTACGGCGCAC  
TTGAACCCGCCATTGATGGTCAGATCATGCAGATTCACCACCAGAAACATCATCAGACT  
TACGTCACTAACTACAACAAGGCTCTTGAGCAGCTTCAAGATGCGTCCGAGAAAGGCG  
ATGCTTCTGCTGTTGTTAAGCTTCAAAGCGCCATCAAATTCAATGGCGGAGGTCATATT

AATCACTCAATTTTCTGGAAGAACCTAGCTCCAATTAAGGAAGGAGGTGGTGAGCCTC  
CAAAAGGTTCTCTGGGTTGGGCTATTGATTCAAATTTTCGGCTCTGTTGAAGCTCTTATT  
CAGAAAATGAATGCCGAAGGAGCTGCCTTGCAAGGTTCTGGTTGGGTGTGGCTAGGA  
CTTGACAAGGAGTTGAAAAGGCTTGTGGTTGAAACGACTGGTAATCAGGATCCACTGG  
TAACTAAAGGAGCAACTTTGGTTCCTTTACTTGGTATAGATGTCTGGGAGCATGCCTAC  
TACTTACAGTACAAGAATGTGAGACCTGATTATCTGAAGAACATATGGAAGGTTATGAA  
CTGGAAATATGCCAGTGATGTTTACGAGAAAGAGTGTCTAGCCCCCTAA

>SuFSD2

ATGGGAAGTTTTACTACTACTACTACTCTCCATTGTAATGGTTTTTCTCCAACCAGT  
AAAATCCCAAGCTTTATTCCCTCAGAAGCGTATAGGATGTCTTGATCGGAGAAGAGGAC  
CTAAAGTAGTTGCATATTATGGGCTAAAAAAGCCTCCTTATAACCTGGATGAATTGGAA  
CCATATATGAGCAGAAAGGCACTCGAGTTACATTGGGGACAGCATCATAAAGGCTACCT  
GGATGCTTTAAACAGGCACCTAAGTAAGAGTGATATACTATATGGCTATACCATGGATGA  
GCTTGTTAAAGTGACATACAACTACGGAAACCCCTCACCGGAATTCAACGATGCTGCA  
CAGGTTTGGAACCACGAATTTTTCTGGGACTCTATGCAACCCGGAGGTGGGGACTCAC  
CAAAGCTTGGACTGCTTCTGCAGATTGAGAAAGATTTTGGTTCTTTCACTAATTTTAAA  
GAGAAATTTACCGAAGCAGCCCTTACATTATTTGGTTCTGGCTGGGTTTGGCTTGTTTT  
GAAGAAGCACGAAAAGCGTCTAGTGATAGTTAAACATCAAATGCAATCACTCCCAT  
GTATGGGACGATATACCCTTATTATGTTTAGATATGTGGGAGCATGCTTATTATTTGGATT  
ACAAGAATGATAGAGCCAAGTATGTAAATGTATTCATGAACCACCTTGTATCATGGCAT  
GCAGCCACTGCACGAATAGCTCGAGCTCAGTCGTTTGTTAACCTAGGCGAACCTAAAG  
TCCCGGTTGCTTAA

>SuCSD1

ATGGGAAAGGCTGTCGTCGTTTTGAACAGCAGTGAGGGTGTCAAAGGAACTGTCCAC  
TTCCTCAAGAAGGAGATGGTCCAACAACCGTGACTGGATCTATCTCGGGTCTCAAGG  
CTGGTCTTCATGGATTCCATGTTTCATGCCCTTGGTGACACCACAAACGGATGCATGTCA  
ACAGGACCACACTTTAACCCTGCTGGAAAAGAGCATGGTGCTCCAGAAGATGAAGTT  
CGCCATTCTGGTGACCTTGGAACATCACAGCTGGGGATGATGGTATGGCAACCTTCA  
CAATCACTGACTGTCAGATTCCTCTTTCTGGACCACACTCTATTGTTGGAAGGGCTGTT  
GTTGTCCATGCTGATCCCGATGACCTTGGAAGAGGGGGCCATGAGCTCAGCAAGACCA  
CTGGTAATGCTGGAGGAAGAATTGCTTGCGGTATTATCGGTCTTCAAGGCTAA

>SuFSD1

ATGCTGCTGTTGCTGCGACTTGTACCATTTCTTGTCTTCAACCTTTCTTTCTCATGGC  
TCTATTTGGGGACCTAAATCTATCCCAGTTACACCTTTCAGATTTAAGGAGGTGCGTGTA  
AGAAGAGCTGGAGCTGCTGTAGTAGCCAAGTTTGACTTGAAGCCTCCGCCATATCCAT  
TTGATGCCTTGGAGCCTCACATGAGTAAACAGACTTTTGAGTTTCATTGGGGAAAGCAT  
CATAGAGCATATGTGGATAACCTGAACAAACAAATTGTTGGAACAGAGTTAGATGGGA  
TGTCACCTTGAAGATGTAGTGAGCGTAACATATAACAAAGGTGACATGCTTCCATCTTTC  
AATAATGCAGCACAGGCCTGGAACCACCAGTTCTTTTGGGAGTCAATGAAACCTGGTG  
GCGGGGGGAAGCCATCTGGAGAACTTTTGGCTCAAATTGAGAAAGATTTTGGTTCTTT  
TGAAGCATTTGTTACAGAATTCAAGTCTGCTGCTGCCACGCAATTTGGTTCTGGTTGGG  
CTTGGCTTGCTTACAAAACGGATAAGTTGGATGTGGGTAATGCGGTAAACCCCTAAACC  
GTCTGAAGATGACAAAAAGCTTGTGATTGTTAAACGCCCAATGCTGTAAACCCCTCTT  
GTCTGGGGTTATAATCCTCTTCTCACCATTGATGTTTGGGAGCATGCATATTACTTGGAC

TACCAGAATCGAAGGCCTGATTACATTTCAATTTTCATGGAGAATCTTGTTTCCTGGGAT  
GCAGTTAGTGCGAGATATGAGACCGCCAAGGCACTTGCTGCTTAG

>SuCSD4

ATGACTTTGCCCCGAATTAGTGACGGAATTCATGGTGTATATGAAGTGCGAAGGATGTGT  
AGATTCTGTCACAAATAAATTAGAGACGGTTCAAGGAGTGAAGAGTATTGAAGCGGAC  
TTGAGCAATCAAGTAGTTAGAATTCGAGGCTCTTCTCCTGTCAAAACCTTGGAAGACG  
CTTTACTGCAAACAGGTCGTACTGCTCGGCTTATTGGTCAAGGACTGCCTGATGATTTT  
CTCGTATCTGCGGCTGTGGCTGAATTCAAAGGCCCTGATATATTTGGAGTTGTTTCGATTA  
GCCCAGGCAAATATGGAATTAGCTAGAATTGAGGCCAATTTTAGTGGGTTGCCACCTGG  
AAAGCATGGTTTCTCAATAAATGAATATGGTGATCTGACAAGAGGTCCAGCTAGTACCG  
GGAAAATGTACAGTCCGACAATCCAAGGCAGTGAAACTGAGGTATTCTCCCCTTGTTT  
AAATAAGATTGATCACCATTTCATTTAG

>SuAPX6

ATGACGACCACCACCTGCAACAAACCACCATTTCTAAGCTGCTGCTTCACCTCCGTATC  
ATCTTCTTTCATCACCAATTTCAATTTTCCCGCCAAATTTCAACCGCCAACTATCAATTT  
TGGCGCCAAATCAACTCCATTGCTCAAACCCTCTTGCGCGATTAAACCATCGTCTGGTG  
ACTTTGGGAACCTTGAATCATGTGGAAGGAGAAGGCTTCTTTTGCTTTCTGCAACAGT  
GCCTTTTCTTATTCATATGCAGGAATACACCAAAGATTTCTATGCTGAAGCGGAAGAGC  
TGGAAGTTACGGGGACCAAATTATAAGAGATAAAGTAAGGAAGGTTTTGACTAAAGG  
GAAGGCAGCTGGTATTCTTCGTCTGGTTTTTCATGATGCAGGAACCTTTGAAAGAAAC  
GACAATTCAGGTGGTATGAACGGCTCTGTAACATATGAACTTGAAAGACCAGAGAATA  
AAGGGCTCAAAAAATCTTTGAAGGCATGCTTTCACACTTTTTCCTCTCGACCTCTTCT  
CCTTATAATATTCTTGAGAAAGCCAAGAATGAGTTGGATGTGCAAGAATTAGTGTCATG  
GGCTGACCTGATTGCTGTAGCTGGAGCTGAAGCAGTCTCAATATGTGGAGGTCCAGTG  
ATTCCTATTCCGTTAGGAAGACTTGATTCACTGACACCTGATCCTGAAGGGAAGCTGCC  
TGAGGAATCACTAGATGCACCTGGACTGAAGCAGTGCTTTAAAAGAAAAGGCTTCTCG  
ACACAAGAACTTGTAGCATTGTCTGGAGCCCATAACAATTGGTAGTAAAGGTTTCGGAA  
GTCCCATTTGAATTTGATAATTCATACTACAAAATCCTACTTGAGAGGCCCTGGGTATCAG  
CAGGTGGAATGTCAGGTATGGTTGGACTTCCTTCAGATCGTGCACTTGTTGAGGATGA  
AGAATGCTTAAGATGGATTACAAAATACGCGAAAGATCAAAATCTGTTTTTCGATGATT  
TTAAGAATGCTTACATCAAGTTGGTCGATTCAGGCGCAAGATGGAAATCTTCATGA

>SuAPX1

ATGGCAAAGAACTACCCAACCTGTGAGCGAGGACTACCAAAAGGCCATTGAGAAGGCA  
AAGAAGAAGCTCAGAGGTCTTATCGCTGAGAAGAGCTGTGCTCCACTTATGCTTCGTA  
TTGCATGGCACTCTGCAGGTACTTTTGATTGCCAGTCAAAGACTGGAGGACCCTTCGG  
TACAATGAGGTTCAAGGAAGAGCTGGCTCATGGAGCCAACAACGGGGTTGACATTGC  
AGTCAGGTTGTTGGAGCCTATCAAGGAACAATTTCCCACCATCTCTTACGCTGACTTCT  
ATCAGTTGGCCGGTGTTGTGGCTGTTGAGATTACTGGAGGACCTGAAGTTCCCTTCCA  
CCCTGGCCGAGAGGACAAGCCAGAGCCTCCACAGGAGGGTCGTCTCCCTGATGCTAC  
CAAGGGTTGTGACCATCTGAGAGACGTGTTTCGTCAAGCAAATGGGTCTTTCTGACCAA  
GACATTGTTGCTCTCTCTGGAGGCCACACCTTGGGAAGGTGCCACAAGGACCGTTTCAG  
GTTTTGAAGGAGCTTGGACCGCTAACCCTCTGATCTTTGACAACACCTACTTCACGGA  
GCTTTTGAGCGGTGAGAAGGAAGGTCTCCTGCAACTACCATCTGACAAGGCTCTTCTG  
GCCGACCCCGTCTTCCGCCCTCTCGTTGAGAAATACGCAGCGGATGAAGATGCGTTCT

TCGCCGACTATGCTGAGGCTCACATGAAGCTGTCCGAGCTTGGGTATGCTCTTGCTATG  
TTCACACTTAA

>SuAPX1a

ATGGCAAAGAACTATCCAACGTGTGAGCGAGGACTACCAAAGACCATTGAGAAGGCA  
AAGAAGAAGCTCAGAGGTCTTATCGCTGAGAAGGGCTGTGCTCCACTTATGCTTCGTA  
TTGCATGGCACTCTGTAGGTACTTTTGATTGCCAGTCAAAGACTGGAGGACCCTTCGG  
AACAATGAGGTTTAAGGAAGAGTTGGCTCACGGAGCCAACAACGGGATTGACATTGC  
AGTCAGATTGTTGGAGCCTATCGAGGAACAATTCCCCACCATCTCTTACGCTGACTTCT  
ATCAGAAATTTTACCGTCTTTTACTTTTGCAGGACAAGCCAGAGCCTCCACAGGAGGG  
TCGTCTCCCTGATGCTACAAAGGGTTGTGACCATCTGAGAGACGTGTTTCGTCAAGCAA  
ATGGGTCTTTTTGACCAAGACATTGTTGCTCTCTATGGAGGCCACACCTTGGAAAGGTG  
CCACAAGGACCGTTCAGGTTTTGAAGGAGCTTGGACCGCTAACCCTCTGATCTTTGAC  
AACACCTACTTCACGGAGCTTTTGAGCGGTGAGAAGGAAGGTCTCCTACAACCTACCAT  
CTGACAAGGCTCTTCTAGTCTACCCTGTCTTACGTCCTCTCGTTGAGAAATATGCAGCG  
GTATGTTTTTACTTTAAGCTCTTATTTTTCCAATACCTTTTCCCCAATAGACCTCTTCCAC  
CTATCCCTGATTTGGAAGTGCCTGAGAATTCGATTGAGTAG

>SuAPX9a

ATGACAAGCCGAAAAGGGCAGATGATCAATGATGCAGAATACTTGAAAGAAATCAATA  
GGGCTCGTCGAGACCTACGTGCACTAATAGTTACCAAGCAATGTGCTCCTATCATGCTG  
CGCCTAGCATGGCATGATGCAGGTACATATGACGCGAAAACAAATACTGGCGGTCCAA  
ATGGTTCAATTAGGTACGAGCTGAGCCATGGTGCCAATAGAGGCCTCAAAGTTGCCATT  
GATTTATGCGAAGAAATAAAGGCGAAACACCCCAGGATTACTTATGCCGACCTCTACCA  
GCTTGCTGGAGTCGTTGCTGTTGAAGTCTCAGGTGGTCCAACCATCGACTTTGTTTCA  
GGTCGAATGGATTGCCGGAGTTCTACTGATGAAGGCCGTCTTCCTGATGCTAATGGAGG  
TAGTGAACATTTGAGAGAGATTTTTTATCGCATGGGTCTTTCTCACAAGGACATTGTTG  
CACTTTCTGGAGCACATACTGGGTAGAGCACATGTAGAGAGATCGGGTTTTGAAGG  
CGCTTGGAACCGGAGCCTCTCAAGTTTGACAACCTCCTACTTTGTTGAATTGCTGAAA  
GGAGAAAAATCGGGGATGCTGAAATTACCTACAGACAAAGTTCTTGTAAGATCCGG  
TGTTCCCTTCACTATGTAGAACTCTATGCTAAGGATGAAGAAGCCTTCTTCAGAGATTATG  
CAGATTCTCACAAGAAGCTATCAGAGTTGGGATTTTACCACCTATCTCTCGCCCCAAG  
ATGGTTACCAAGGTTGTGGTTGTCATCGCATTTGCTGTTACCGTTGCTGTCTTCAGCTAT  
TTCTGTGAAGTTTAA

>SuAPX9b

ATGACAAGTCGAAAAGGGCAGATGATCAATGATGCAGAATACTTGAAAGAAATCAATA  
GGGCTCGTCGACACCTACGTGCACTAATAGTTACCAAGCAATGTGCTCCTATTATGCTG  
CGCCTAGCATGGCATGATGCAGGTACATATGACGCGAAAACAAAGACTGGCGGTCCAA  
ATGGTTCAATTAGGTACGAGTTGAGTCATGGTGCCAATAGAGGCCTCAAAGTTGCCATT  
GATTTCTGTGAAGAAATAAAGGCGAAACACCCCAGGATTACTTATGCCGACCTCTACC  
AGCTTGCTGGAGTCGTTGCTGTTGAAGTCTCAGGTGGTCCAACCATCGACTTTGTTTC  
AGGTCGAATGGATTGCCGGAGTTCTACTGATGAAGGCCGTCTTCCTGATGCTAATGGAG  
GTAGTGAACATTTGAGAGAGATTTTTTATCGCATGGGTCTTTCTCACAAGGACATTGTT  
GCACTTTCTGGAGCACATACTGGGTAGAGCACATGTAGAGAGATCGGGTTTTGAAG  
GCGCTTGGAACCGGAGCCTCTCAAGTTTGACAACCTCCTACTTTGTTGAATTGCTAAA  
AGGAGAAAGATCAGGGATGCTGAAATTACCTACAGACAAAGTTCTTGTAAGATCCG



GTGTTCCCTTCACTATGTCGAACTCTATGCTAAGGATGAAGAAGCCTTCTTCAGAGATTATG  
CAGATTCTCACAAGAAGCTGTCAGAGTTGGGGTTTGCACCACCTAATAACTCTCGC  
CTGAAGATGGTTACGAAGGTTGTGGTTGTCATCGCATTGTGCTGTTACCGTTGCTGTCTT  
CAGCTACTCGTGTGAAGTTTAA

>SuAPX9

ATGACAACTCGAAAAGGGCAGGTGAATGATGCAGAATACTTGAAAGAAATCGATAAG  
GCTCGTCGAGACCTACGTGCACTAATATTTACCAAGCAATGTGCTCCTATCATGCTGCG  
CCTAGCATGGCATGATGCAGGTACATATGATGTGAAAACAAAGACTGGCGGTCCAAAT  
GGTTCAATTAGGTACGAGTTGAACCACGGTGCCAATAAAGGCCTCAAAGTTGCCATTG  
ATTTCTGTGAAGAAATAAAGGCTAAACACCCAAGGATCACTTATGTAGACCTTTACCAG  
CTTGCTGGAGTCGTTGCTGTGGAAGTCTCAGGTGGTCCAATAATCGACTTTATTCCAGG  
TCGAATGGATTGCCCCGGTCCTACTGATGAAGGCCGTCTTCCTGATGCTAATGGAGGTG  
GCGAACATTTGAGAGAGATTTTTTATCGCATGGGTTTTTCTGACAAGGACATCGTTGCA  
CTTTCTGGAGCACATACACTGGGTACAGCACATGCAGATATATCAGGTTTCAAAGGAGC  
TTGGACACCGGAGCCTCTCAAATTTGACAACTCGTACTTTGTTGAAATGCTGAAAGGA  
GAAAGAGCAGGGATGCTGAAACTACCTACAGACAAAGTTCTTGTACAAGGTCCGGTG  
TTCCGTCCCTATGTTGAACTCTATGCTAAGGACGAGGAAGCCTTCTTCAGAGATTATGC  
AGACTCTCACAAGAAGCTATCAGAGTTGGGATTTGCACCACCTAACTCGCGCCGAAA  
ATGGTTACGAAGGTTGTGGTTGGTATTGCTATTGCTGTTACCGTTGCTGTCTTCAGCTAC  
TTCTATGACATTTATAAGCAAGCTAAGTAA

>SuAPX3

ATGGCGATGCCGGTCGTTGACACGGAATACCTCAAACAAATCGACAAAGCTCGTCGCG  
ATCTCCGCGCTCTCATCTCTAGTCGCAATTGCGCTCCTCTCATGCTTCGCCTCGCGTGGC  
ATGATGCTGGAACCTTATGATGCGAAGACGAAGACAGGTGGACCGAACGGTTCGATTAG  
GAATGAGGAAGAGTTTGCTCATGGTGCTAATAACGGTCTCAAGAAAGCTATTGATTGGT  
GTGAGGAGGTGAAAGCCAAGTATCCAAAGATTACATATGCCGACTTTTATCAGCTTGCT  
GGTGTGTTGTCAGTTGAAGTCACAGGAGGCCCGACTGTTGATTTTGTTCCCTGGTAGAA  
AGGACTCCAAGGTATCTCCCAGAGAAGGGCGACTTCCAGATGCCAAACAAGGTGCAC  
CACACCTGAAGGACATATTTTATCGGATGGGTCTTAGTGACAAAGATATCGTAGCCTTG  
TCAGGCGGACACACCTTGGGAAGGGCACATCCAGAGAGATCAGGTTTTGATGGTGCAT  
GGACCCAAGAGCCCCCTCAAGTTTGATAACTCATATTTTGTAGAGCTGCTGAAAGGAGA  
ATCAGAGGGACTGTTGCAGCTTCCGACTGACAAAGCTCTGTTAGATGATCCTGTATTTT  
GCCCTTACGTTGAACTCTATGCTAAGGATGAGGAAGCTTTCTTCCGCGACTATGCTGTT  
TCGCACAAGAACTTTCTGAACTGGGCTTTACTCCTGGTGGGTCCAAGTCAGGGCCAA  
AGGACAGCATTATACTGGCCCAAGGTGCGGTGCGGGTTGCAGTTGCTGCAGCTGTGGT  
TATCCTGAGCTATATCTATGAAGTTCGCAAGAGAGTAAAGTAG

>SuAPX10b

ATGGCACAAATGACAAGATGTGGGCAAATGGTGGATACTGAATATATGAGACAGATTGT  
AGAAGCTCGTATTGATCTTCACAATCTATTATCCCGTAATAAGGAATTCGCTCCTACCAT  
TCTTCGCTTAGCATTTTCATGATGCTGGAACATATGACGCCAAAACAAACACAGGTGGTG  
TAAATGGTTTCAGTTAGGAACGAAATGAGCACCGCGCCTAATGTTGGCATGCAAGCAGC  
TCTTGATTTCTGCGAGCCGGTGAAAGTGAGGCACCCCAAGGTCATTATGCCGATCTTT  
ATCAGCTTGCCGGAGTTGTTGCAGTAGAAGTGACTGGCGGTCCAAGATAGAATTCGT  
CCCTGGTCGGAAGGATGTCTCGCCGCAGCAAGACCAAGGAACTCTTCCCGGTCCCAAT

GCAGATAGCAATCAATTGAGGAACATATTTACAGGATGGGTCTCAATGACAAGGATAT  
TGTGGTACTATCTGGGGCTCACACACTGGGTAGGGCACATCAGGATCGATCAGGCTTTG  
ATGGTCCTTTACACAGAGACCCGCTCACATTCGACAATTCCTATTATGTGCTTTTGACGC  
AGGGTGACGCTCCAGGGCTAGTCAAATTTCCAGTGACAAAACCTCTCATGCAAGATCC  
TACATTCGGTCGCTATGTTCAAATTTATGCCAAGGATCAGAATCGGTTCTTCAAACATTA  
TGCAAAGTCACACAAAAAGATGTCAGAGCTTGGATTTTCATTACCCAAATAAACGTAAC  
TCTCGCAAACACCAGACCTCACACTCGCATGAGATACCCAACCACAACCAGAACCCT  
GCCAACATAACCAAAACCACCATGCTCAGCCACAGCAACACGCTCAGTGCCGTCCAC  
GCGCACCCCTGTGGATACTGA

>SuAPX10a

ATGGCAAAGGTAGATGCAGACTATTTGAAGCAAATCGAGGCTGCTCGCAATGAGCTTC  
GCAACATTATCCGCTCCCAAAATTGCGCTCCTATTATGCTCCGCTTAGCATTTCATGATG  
CAGGGACATTTGATGCGAAAACGAAGACAGGAGGTCCAAATGGTACAATTAGGCTGG  
AGTTAAGCGCCCCCTCAAACAATGGCATCAAAGTTGCTGTGATCTTTGTGAACCACT  
GAAGGCTAAACACCCCCAAAGTTACCTATGCTGACATTTATCAGGACGCGCCGCAACAA  
GACAGCACTGGAGGTCTTCCAAATCCTGGTGGAGATGCTCAACATTTGAGAGATGTAT  
TCCACCGAATGGGTCTTTCTGACAGGGATATTGTCGCGCTTTCCGGCTCTCATACACTG  
GGTAGAGCACATCAGGATAGATCAGGCTTTGACGGTCCGTTTACCCCAACCTTTGA  
AATTCGACAATTCATACTTCGTAGAGCTGAGGAAAGGTGAAACACCCGGATTGGTGAA  
ATTTCCAATGATAATGTTTTGACAAAAGATCCAGTGTTCCGCAAATATGTCCAGATCTA  
TGCTCAGGACGAGAAGACATTTTTCGCTCACTATGCAGAATCACACAAGAAGATGTCT  
GAGCTTGGATTCCGCCCCACCAGCCCGTGCTTAA

>SuAPX7

ATGGCAACCCTAACTGGCACCGCCGCCGCCGCCGCCGCAACAACCACCACTCGCCGAT  
TCCTAATCCACTCATCTTCTTCATTATCATCATCATCTTCATCGTCGGTGAAATGCGTCAG  
GCCGTCGCATACGATATCGAATTTGTTTCATGAGAAAAAGGAGTGGTGAACGAGGTGGA  
ATGCATTTGATTAGGTCAAATTCGAGTCGGAATTTTACGACGAAATGTTCTGCTTCTGAT  
CCTCAGCAGTTGAAGAGCGCGAAAGAAGATATTAAATCGCTTCTTAATTCCACATTTTG  
TCATCCTATTCTTGTACGATTAGGATGGCATGATTACAGGTAATTATAACAAGGATATCCA  
AGATTGGCCTCAACGAGGTGGAGCTAATGGCAGTCTCCGCTTTGAGGTTGAACTTAAA  
CATGGAGCTAATGCTGGTCTTGTGAATGCCTTGAACTTATTCAGCCCATTAAGGACAA  
GTATTCCGGAGTCACTTATGCAGATCTATTCCAGTTGGCCAGTGCCACAGCAATTGAGG  
AGGCTGGTGGTCCGAAAATACCAATGAAGTATGGAAGAGTGGATGTGACAGGACCCG  
ATCAGTGCCCAGAAGAAGGAAGACTTCCTGCATTGTTTCTTCCTCTGAAATTATGGCAG  
AAAAAATTTGCATTATCGTCTATTCTTCTGGCATTATGTTAAACACATCTTCATTGTGTA  
CTTTTAGAGCTCGTAGTTGTTCTATTGCGACCTATGTTTTCTGCTCTTACTTCCCACTC  
CTCAACTGATTCTTGGTATTTGGTTGCTCAGATGCTGGACCTCCTTCACCTGCTCAACAT  
CTACGTGATGTCTTCTACAGAATGGGTCTCAGTGACAAGTAATCTGAGTTTCATCTTCTT  
GTATGAGTTTCTGAAGCAGAAAGATGGTCCAGGAGCTCCTGGTGGACAGTCGTGGAC  
AGCACAATGGTTGAAGTTTGATAATTCGTACTTCAAGGACATCAAAGAAAAGAGAGAT  
GAAGATTTGCTCGTCTTGCCAACTGATGCTGCTCTTTTCGAAGACCCATCTTTCAAGGT  
GTATGCTGAGAAATATGCAGCAGATCAGGAGGCGTTTTTCAAAGACTATGCTGAGGCA  
CACGCAAAGCTCAGTAACCTTGAGGCCAAGTTCGACCCTCCTGAGGGTTTCTCATTGG  
ACGAACCTGCTCCAGAGAAGTTTGTAGCAGCAAAGTACTCATCTGGCCAGGATTAA

>SuCAT1

ATGGATCCCTACAAGTTTCGTCCGTCAAGTGCACACAATTCGCCATTCTGGACTACTAA  
TTCTGGTGCTCCTGTTTATAACAACAATTCCTCGTTGACCGTTGGTAACAGAGGTCCCA  
TTCTTTTAGAGGATTACCATCTAGTGGAGAACTTGCCAACTTTGACAGGGAGCGTATC  
CCAGAACGTGTTGTTTCATGCCAGGGGAGCGAGTGCTAAGGGATTTTTTGAAGTCACCC  
ATGATGTTTCTCACCTTACATGTGCTGATTTCCTACGCGCCCCCTGGTGTCCAGACGCCT  
GTTATTGTTTCGCTTCTCCACTGTTATTCATGAACGTGGGAGTCCTGAAACACTCAGGGA  
CCCTCGTGGTTTTGCTGTGAAGTTCTACACCAGAGAGGGTAACTTTGATATGGTAGGGA  
ACAATTTCCCTGTGTTTTTCATCCGTGATGGCATGAAGTTCCCTGATATGGTGCATGCAT  
TGAAACCCAACCCCAAATCTCACATCCAAGAAAACCTGGAGGATCCTTGATTTCTTCTCT  
CACCACCCTGAGAGTTTACACATGTTTTCTTTCTTTTGATGATATTGGAATTCCTGCC  
AACTACAGACACATGGAAGGGTCTGGTGTCAACACATATATGCTGATTAACAAGGCTG  
GGAAAGCTCAATATGTCAAGTTTCATTGGAAACCAACCTGTGGAGTGAAATCTTTGTT  
GGAAGATGAGGCCATAAAAGTTGGTGGGGCCAACCATAGTCATGCAACTCAGGACCTC  
TTTGATTTCGATCGCTGCCGGAATTATCCCGAATGGAAATTGTTTCATCCAAACAATTGA  
CCCGTTGATGAAGATAAGTTTGATTTTGACCCACTAGATGTTACCAAGACATGGCCTG  
AGGATATTTTGCCATTACAGCCAGTTGGACGCCTAGTTTTGAACAAGAACATTGACAAC  
TTCTTTGCAGAAAATGAGCAGCTGGCATTTTGCCCTGCAATTATTGTTCTCTGGTATCTAC  
TACTCAGATGACAAGCTACTCCAGACTCGAATTTTCTCATATGCTGATACCCAAAGACA  
CCGTCTTGGACCCAACCTACAAATTCCTGTTAATGCACCAAAATCTGCTCATCATA  
ACAATCACTATGATGGATTCATGAACTTTATGCACAGGGATGAGGAGGTTGATTACTTC  
CCTTCTAGATATGATCCTGTTTCGTCATGCTGAGAAATATCCCATTCACCAAATGTCTTG  
AGTGGTAGACGTGACAGGCAAATCATTGTAAAGGAGAACAACTTCAAGCAGCCTGGA  
GAGAGATACCGGTCCTTTGACCCGGCCAGGCAAGAGAGATTTCTCCAAAGATGGGTTG  
AGGCGCTATCTGATCCTCGTATCACTCACGAGATTCGCAGCATCTGGGTTTCATACTGGT  
CACAGGCTGACAAGTCATTGGGCATGAAGCTAGCAAGTAGGCTTAATGTGAGGCCAAC  
CATGTGA

>SuCAT2

ATGGATACATGCAAGTATCGACCATCAAGTGCTTACAACCTCCCCTTACTTGACAACCAA  
CACTGGCTCACCGGTTTATAACGACAACCTCTGCTTTGACCGTTGGTGCCCCGAGGACCA  
ATTCTATTGGAAGATTACCATCTGATAGAAAAGATAACAACATGGACTCACGAGCGTAT  
CCCGGAGCGTGTGGTACACGCTAGGGGTGCCAGTGCAAAGGGCTTCTTTGAAGTCACT  
CATGACATAACTCATCTTACCTGTGCTGATTTCCTTCGTGCTCCCGGTGTTCAAACCTCCT  
GTCATTGTTTCGTTTTCTCGACTGTCATCCATGAGCGCGGTAGCCCTGAAACCATCCGTGA  
CCCTCGTGGTTTTTGCCACCAAGTTCTACACCCGTGAGGGTAACTTTGATTTGGTGGGG  
AACAATTTCCCGGTATTTTTCACCCGTGATGCAATGCAGTTCTTTGATCTGATCCGGGCC  
TTCAAACCAAACCCGAAATCCCACATCCAAGAGGACTGGAGGTTCTTGGAACCACTGCT  
CCCACCTCCCTGAGAGCCTCAACACCTTCACCTTCTTCTATGATGACATGGGTATCCCG  
ATCAACTACCGACACATGATTGGGTCAGGGGTCCACACCTTCACTATGTTGAACAAGG  
CAGGCAAGGTCACCTATGTCAAGTTCCACTGGAGGCCCACGTGTGGCGTCAAGAACAT  
GCTTGAGGAGGAAGCTGCTAAAGTCGTTGCAGAAAACCACAGTCACGCGACAAAAGA  
TCTTTATGATGCAATTGCCTCAGGAAACTACCCTGAGTGGAAGCTCTTCATCCAAACCA  
TGATCCAGCTGATGAGGATAAGTTTGATTTTCGACCCGTTGGATACCACCAAGACTTGG  
CCTGAGGATATTTTACCGTTGCAGCCCGTTGGACGGATGGTGTGAACAAAAACATTG

ATAACTTTTTCAATGAGAACGAGATGCTTGCGTTTAACCCGGCTGCAATTGTTCTTGGG  
ATCCATTTCTCTGATGATAAGATGCTTCAGGCTCGAACTTTGCCTATGCTGATACTCAG  
AGATATCGGCTTGGTCCTAATTTTCATGCAGCTTCCTGTTAATGCTCCCAAGTGCCCTCAT  
CATAACAATCATAGAGACGGGCCTATGAACATGGTTTTTCAGGGACGAAGAGGTGGATT  
ACTTCCCATCAAGATTTGATCCTGTTTCGTGAGGCCGAGAGATTCCCCATCCCTCACTTT  
GTAGTTCATGGAAGGCGCGAAAGGCAAATCATTCCAAAGGAGAACTTCAAGGAG  
CCCGGTGACAGATACAGATCCTGGGACCCAGCCAGGCAAGAGAGGTTTATTGGAAGAT  
TCGTCAAGGCTTTGTCCGATCCCCGCCTAACTTATGAGATTTCGCAGCATTTGGGTAAATT  
GGTTCACTCAGGCAGATAAATCTCTAGGCATGAAAGTGGCAAGCAGACTCAATGTGAG  
ACCAACCATGTAA

#### **Amino acid sequences of AsCAT1 and GpCAT1**

>AsCAT1

MDPYKFRPSSAHNSPYWTTNSGAPVYNNSSSLTVGNRGPILLEDYHLVEKLANFDRERIP  
ERVVHARGASAKGFFEVTHTDISHLTCADFLRAPGVQTPVIVRFSTVIHERGSPETLRDPRGF  
AVKFYTREGNFDLVGNNFPVFFFIRDGMKFPDMVHALKPNPKSHIQENWRIMDDFFSHHPES  
LHMFTFLFDDIGVPANYRHMEGSGVNTYMLINKAGKAYYVKFHWKPTCGVKSLLLEDEAI  
KVGGANHSHATQDLYDSIAAGNYPEWKLFITIDPADEDKFDFDPLDVTKTWPEDILPLQP  
VGRLVLNKNIDNFFAENEQLAFCPAIVVPGVYYSDDKLLQTRIFSYADTQRHRLGPNYLQL  
PVNAPKCAHHNNHYDGFMNFMHRDEEVDYFPSRYDPVRHAEKYPIPSNVLNGKRDRQII  
VKENNFKQPGERYRSFDPARQERFIQRVVDALSDPRITHEIRSIWVSYWSQADKSLGMKL  
ASRLNVRPTM\*

>GpCAT1

MDPYKFRPSSAYNSTYFTTNSGAPVYNNSSSLTVGTRGPILLEDYHLVEKLANFDRERIPE  
RVVHARGASAKGFFEVTHTDISHLSCADFLRAPGVQTPVIVRFSTVIHERGSPETLRDPRGF  
AVKFYTREGNFDLVGNNFPVFFVVRDGMKFPDMVHALKPNPKNHIQENWRIMDDFFSHHPE  
SLHMFTFLFDDIGVPADYRHMEGSGVNTYMLVNKAGKAYYVKFHWKPTCGVKSLLLEDE  
AIKVGGANHSHATQDLHDSIMAGNYPEWKLFITIDPADEDKFDFDPLDVTKTWPEDILPL  
QPVGRLVLNKNIDNFFAENEQLAFCPGIVVPGVYYSDDKLLQTRIFSYSDTQRHRLGPNYL  
QLPVNAPKCAHHNNHHDGFMNFMHRDEEVNYFPSRYDPVRHAEKYPIPSNVLNGKRDK  
QVIVKENNFKQPGERYRSFDPARQERFIQRVVDALSDPRVTHEVRAIWVSYWTQADKSLG  
MKLASRLNVRPTM\*
