# Supplementary material for: Molecular Mechanism of Response and Adaptation of Antioxidant Enzyme System to Salt Stress in Leaves of Gymnocarpos przewalskii
Source: Plants (Basel). 2023 Sep 25;12(19):3370. doi: 10.3390/plants12193370 (PMC10574792; doi:10.3390/plants12193370)
Supplement: Supplementary file 1 [file plants-12-03370-s001.zip]

Archive with 11 entries (11 files):
- AsCAT1.pdb
- CDS sequence of the gene identified in this paper.pdf
- Figuer S1 Quality evaluation of protein model.pdf
- GpCAT1.pdb
- H2O2.sdf
- Table S1 qRT-PCR primer information and reaction system.xlsx
- Table S2 Gene identification results.xlsx
- Table S3 Physical and chemical properties of protein.xlsx
- Table S4 Correlation analysis between gene expression and enzyme activity.xlsx
- Table S5 Molecular evolutionary analysis.xlsx
- Table S6 Molecular docking.xlsx
