# Supplementary material for: Molecular Mechanism of Response and Adaptation of Antioxidant Enzyme System to Salt Stress in Leaves of Gymnocarpos przewalskii
Source: Plants (Basel). 2023 Sep 25;12(19):3370. doi: 10.3390/plants12193370 (PMC10574792; doi:10.3390/plants12193370)
Supplement: Supplementary file 1 [file plants-12-03370-s001.zip › AsCAT1.pdb]

EXPDTA    THEORETICAL MODEL, MODELLER 10.1 2023/02/17 20:14:28
REMARK   6 MODELLER OBJECTIVE FUNCTION:     15445.9229
REMARK   6 MODELLER BEST TEMPLATE % SEQ ID:  50.104
REMARK   6 SEQUENCE: oldsequence
REMARK   6 ALIGNMENT: oldsequence.ali
REMARK   6 SCRIPT: PHHBAA.py
REMARK   6 DOPE score: -230850.07813
REMARK   6 GA341 score: 1.00000
REMARK   6 TEMPLATE: 2j2m 6:A - 484:A MODELS 1:A - 478:A AT 50.1%
REMARK   6 TEMPLATE: 2j2m 6:B - 484:B MODELS 1:B - 478:B AT 50.1%
REMARK   6 TEMPLATE: 2j2m 6:C - 484:C MODELS 1:C - 478:C AT 50.1%
REMARK   6 TEMPLATE: 2j2m 6:D - 484:D MODELS 1:D - 478:D AT 50.1%
REMARK   6 TEMPLATE: 2j2m 501:A - 501:A MODELS 400:A - 400:A AT 50.1%
REMARK   6 TEMPLATE: 2j2m 501:B - 501:B MODELS 400:B - 400:B AT 50.1%
REMARK   6 TEMPLATE: 2j2m 501:C - 501:C MODELS 400:C - 400:C AT 50.1%
REMARK   6 TEMPLATE: 2j2m 501:D - 501:D MODELS 400:D - 400:D AT 50.1%
ATOM      1  N   PRO A   1      37.577 -33.522  30.653  1.00 62.56           N
ATOM      2  CA  PRO A   1      37.392 -32.616  29.486  1.00 62.56           C
ATOM      3  CD  PRO A   1      36.743 -33.025  31.801  1.00 62.56           C
ATOM      4  CB  PRO A   1      36.315 -31.609  29.883  1.00 62.56           C
ATOM      5  CG  PRO A   1      36.336 -31.596  31.415  1.00 62.56           C
ATOM      6  C   PRO A   1      38.713 -31.972  29.227  1.00 62.56           C
ATOM      7  O   PRO A   1      39.508 -31.843  30.155  1.00 62.56           O
ATOM      8  N   TYR A   2      38.958 -31.526  27.983  1.00 53.80           N
ATOM      9  CA  TYR A   2      40.237 -30.955  27.679  1.00 53.80           C
ATOM     10  CB  TYR A   2      40.831 -31.447  26.346  1.00 53.80           C
ATOM     11  CG  TYR A   2      40.986 -32.929  26.413  1.00 53.80           C
ATOM     12  CD1 TYR A   2      42.053 -33.502  27.066  1.00 53.80           C
ATOM     13  CD2 TYR A   2      40.059 -33.747  25.807  1.00 53.80           C
ATOM     14  CE1 TYR A   2      42.188 -34.870  27.119  1.00 53.80           C
ATOM     15  CE2 TYR A   2      40.189 -35.115  25.856  1.00 53.80           C
ATOM     16  CZ  TYR A   2      41.256 -35.678  26.514  1.00 53.80           C
ATOM     17  OH  TYR A   2      41.396 -37.081  26.568  1.00 53.80           O
ATOM     18  C   TYR A   2      40.073 -29.475  27.540  1.00 53.80           C
ATOM     19  O   TYR A   2      39.151 -28.989  26.888  1.00 53.80           O
ATOM     20  N   TRP A   3      40.981 -28.726  28.192  1.00126.43           N
ATOM     21  CA  TRP A   3      41.040 -27.296  28.108  1.00126.43           C
ATOM     22  CB  TRP A   3      42.218 -26.724  28.918  1.00126.43           C
ATOM     23  CG  TRP A   3      42.443 -25.234  28.795  1.00126.43           C
ATOM     24  CD2 TRP A   3      42.140 -24.269  29.816  1.00126.43           C
ATOM     25  CD1 TRP A   3      43.034 -24.544  27.777  1.00126.43           C
ATOM     26  NE1 TRP A   3      43.102 -23.209  28.090  1.00126.43           N
ATOM     27  CE2 TRP A   3      42.562 -23.025  29.344  1.00126.43           C
ATOM     28  CE3 TRP A   3      41.568 -24.409  31.048  1.00126.43           C
ATOM     29  CZ2 TRP A   3      42.416 -21.898  30.101  1.00126.43           C
ATOM     30  CZ3 TRP A   3      41.414 -23.269  31.805  1.00126.43           C
ATOM     31  CH2 TRP A   3      41.830 -22.038  31.340  1.00126.43           C
ATOM     32  C   TRP A   3      41.326 -26.990  26.681  1.00126.43           C
ATOM     33  O   TRP A   3      42.177 -27.646  26.083  1.00126.43           O
ATOM     34  N   THR A   4      40.613 -25.989  26.112  1.00 60.29           N
ATOM     35  CA  THR A   4      40.752 -25.631  24.728  1.00 60.29           C
ATOM     36  CB  THR A   4      39.613 -26.097  23.870  1.00 60.29           C
ATOM     37  OG1 THR A   4      38.402 -25.485  24.289  1.00 60.29           O
ATOM     38  CG2 THR A   4      39.500 -27.628  23.981  1.00 60.29           C
ATOM     39  C   THR A   4      40.817 -24.147  24.588  1.00 60.29           C
ATOM     40  O   THR A   4      40.534 -23.422  25.536  1.00 60.29           O
ATOM     41  N   THR A   5      41.260 -23.666  23.401  1.00 62.18           N
ATOM     42  CA  THR A   5      41.200 -22.268  23.066  1.00 62.18           C
ATOM     43  CB  THR A   5      42.172 -21.860  21.992  1.00 62.18           C
ATOM     44  OG1 THR A   5      41.905 -22.565  20.787  1.00 62.18           O
ATOM     45  CG2 THR A   5      43.599 -22.157  22.474  1.00 62.18           C
ATOM     46  C   THR A   5      39.817 -22.069  22.518  1.00 62.18           C
ATOM     47  O   THR A   5      39.057 -23.026  22.387  1.00 62.18           O
ATOM     48  N   ASN A   6      39.455 -20.818  22.178  1.00 91.26           N
ATOM     49  CA  ASN A   6      38.148 -20.510  21.672  1.00 91.26           C
ATOM     50  CB  ASN A   6      37.933 -19.003  21.467  1.00 91.26           C
ATOM     51  CG  ASN A   6      37.989 -18.277  22.811  1.00 91.26           C
ATOM     52  OD1 ASN A   6      38.193 -17.065  22.864  1.00 91.26           O
ATOM     53  ND2 ASN A   6      37.808 -19.026  23.930  1.00 91.26           N
ATOM     54  C   ASN A   6      37.999 -21.203  20.347  1.00 91.26           C
ATOM     55  O   ASN A   6      36.885 -21.386  19.853  1.00 91.26           O
ATOM     56  N   SER A   7      39.148 -21.504  19.706  1.00104.30           N
ATOM     57  CA  SER A   7      39.268 -22.177  18.436  1.00104.30           C
ATOM     58  CB  SER A   7      40.652 -21.976  17.793  1.00104.30           C
ATOM     59  OG  SER A   7      40.714 -22.655  16.547  1.00104.30           O
ATOM     60  C   SER A   7      39.041 -23.663  18.555  1.00104.30           C
ATOM     61  O   SER A   7      38.961 -24.352  17.539  1.00104.30           O
ATOM     62  N   GLY A   8      38.990 -24.217  19.782  1.00 47.95           N
ATOM     63  CA  GLY A   8      38.736 -25.626  19.926  1.00 47.95           C
ATOM     64  C   GLY A   8      40.014 -26.394  19.789  1.00 47.95           C
ATOM     65  O   GLY A   8      40.037 -27.625  19.787  1.00 47.95           O
ATOM     66  N   ALA A   9      41.151 -25.690  19.703  1.00158.32           N
ATOM     67  CA  ALA A   9      42.402 -26.379  19.657  1.00158.32           C
ATOM     68  CB  ALA A   9      43.464 -25.561  18.875  1.00158.32           C
ATOM     69  C   ALA A   9      42.672 -26.683  21.092  1.00158.32           C
ATOM     70  O   ALA A   9      41.749 -26.452  21.857  1.00158.32           O
ATOM     71  N   PRO A  10      43.787 -27.183  21.543  1.00438.40           N
ATOM     72  CA  PRO A  10      43.807 -27.478  22.956  1.00438.40           C
ATOM     73  CD  PRO A  10      44.454 -25.879  21.646  1.00438.40           C
ATOM     74  CB  PRO A  10      43.461 -26.474  23.903  1.00438.40           C
ATOM     75  CG  PRO A  10      43.936 -25.248  23.000  1.00438.40           C
ATOM     76  C   PRO A  10      45.201 -27.489  23.407  1.00438.40           C
ATOM     77  O   PRO A  10      46.190 -27.687  22.713  1.00438.40           O
ATOM     78  N   VAL A  11      45.126 -27.166  24.714  1.00147.56           N
ATOM     79  CA  VAL A  11      46.214 -26.597  25.400  1.00147.56           C
ATOM     80  CB  VAL A  11      45.849 -25.469  26.329  1.00147.56           C
ATOM     81  CG1 VAL A  11      47.105 -25.092  27.136  1.00147.56           C
ATOM     82  CG2 VAL A  11      45.279 -24.289  25.530  1.00147.56           C
ATOM     83  C   VAL A  11      46.894 -27.588  26.273  1.00147.56           C
ATOM     84  O   VAL A  11      46.271 -28.251  27.091  1.00147.56           O
ATOM     85  N   TYR A  12      48.195 -27.787  26.025  1.00308.30           N
ATOM     86  CA  TYR A  12      49.114 -28.486  26.908  1.00308.30           C
ATOM     87  CB  TYR A  12      50.491 -29.162  26.524  1.00308.30           C
ATOM     88  CG  TYR A  12      51.575 -28.956  27.609  1.00308.30           C
ATOM     89  CD1 TYR A  12      51.687 -29.693  28.773  1.00308.30           C
ATOM     90  CD2 TYR A  12      52.515 -27.951  27.517  1.00308.30           C
ATOM     91  CE1 TYR A  12      52.647 -29.502  29.737  1.00308.30           C
ATOM     92  CE2 TYR A  12      53.496 -27.725  28.459  1.00308.30           C
ATOM     93  CZ  TYR A  12      53.571 -28.507  29.582  1.00308.30           C
ATOM     94  OH  TYR A  12      54.566 -28.291  30.559  1.00308.30           O
ATOM     95  C   TYR A  12      49.538 -27.629  28.014  1.00308.30           C
ATOM     96  O   TYR A  12      49.526 -28.084  29.151  1.00308.30           O
ATOM     97  N   ASN A  13      49.924 -26.376  27.711  1.00107.70           N
ATOM     98  CA  ASN A  13      50.538 -25.629  28.771  1.00107.70           C
ATOM     99  CB  ASN A  13      51.979 -25.197  28.437  1.00107.70           C
ATOM    100  CG  ASN A  13      52.708 -24.773  29.710  1.00107.70           C
ATOM    101  OD1 ASN A  13      53.921 -24.568  29.697  1.00107.70           O
ATOM    102  ND2 ASN A  13      51.969 -24.654  30.846  1.00107.70           N
ATOM    103  C   ASN A  13      49.773 -24.370  29.041  1.00107.70           C
ATOM    104  O   ASN A  13      49.920 -23.375  28.337  1.00107.70           O
ATOM    105  N   ASN A  14      48.926 -24.411  30.081  1.00128.37           N
ATOM    106  CA  ASN A  14      48.140 -23.323  30.586  1.00128.37           C
ATOM    107  CB  ASN A  14      46.883 -23.775  31.353  1.00128.37           C
ATOM    108  CG  ASN A  14      45.925 -22.588  31.451  1.00128.37           C
ATOM    109  OD1 ASN A  14      46.049 -21.608  30.719  1.00128.37           O
ATOM    110  ND2 ASN A  14      44.941 -22.673  32.386  1.00128.37           N
ATOM    111  C   ASN A  14      48.923 -22.420  31.514  1.00128.37           C
ATOM    112  O   ASN A  14      48.355 -21.453  32.014  1.00128.37           O
ATOM    113  N   ASN A  15      50.128 -22.848  31.959  1.00103.79           N
ATOM    114  CA  ASN A  15      51.008 -22.146  32.868  1.00103.79           C
ATOM    115  CB  ASN A  15      51.834 -23.122  33.719  1.00103.79           C
ATOM    116  CG  ASN A  15      50.872 -23.839  34.653  1.00103.79           C
ATOM    117  OD1 ASN A  15      50.079 -23.209  35.350  1.00103.79           O
ATOM    118  ND2 ASN A  15      50.934 -25.197  34.664  1.00103.79           N
ATOM    119  C   ASN A  15      51.986 -21.151  32.279  1.00103.79           C
ATOM    120  O   ASN A  15      52.314 -20.164  32.935  1.00103.79           O
ATOM    121  N   SER A  16      52.540 -21.377  31.068  1.00 59.80           N
ATOM    122  CA  SER A  16      53.633 -20.517  30.679  1.00 59.80           C
ATOM    123  CB  SER A  16      54.987 -21.243  30.657  1.00 59.80           C
ATOM    124  OG  SER A  16      55.324 -21.676  31.967  1.00 59.80           O
ATOM    125  C   SER A  16      53.433 -19.914  29.327  1.00 59.80           C
ATOM    126  O   SER A  16      52.944 -20.555  28.399  1.00 59.80           O
ATOM    127  N   SER A  17      53.827 -18.631  29.187  1.00 98.90           N
ATOM    128  CA  SER A  17      53.732 -17.992  27.911  1.00 98.90           C
ATOM    129  CB  SER A  17      53.637 -16.459  27.991  1.00 98.90           C
ATOM    130  OG  SER A  17      54.652 -15.945  28.835  1.00 98.90           O
ATOM    131  C   SER A  17      54.885 -18.429  27.055  1.00 98.90           C
ATOM    132  O   SER A  17      55.862 -19.009  27.532  1.00 98.90           O
ATOM    133  N   LEU A  18      54.761 -18.199  25.731  1.00107.75           N
ATOM    134  CA  LEU A  18      55.785 -18.562  24.795  1.00107.75           C
ATOM    135  CB  LEU A  18      55.214 -18.712  23.375  1.00107.75           C
ATOM    136  CG  LEU A  18      56.236 -19.099  22.295  1.00107.75           C
ATOM    137  CD1 LEU A  18      56.689 -20.558  22.455  1.00107.75           C
ATOM    138  CD2 LEU A  18      55.706 -18.794  20.888  1.00107.75           C
ATOM    139  C   LEU A  18      56.745 -17.411  24.776  1.00107.75           C
ATOM    140  O   LEU A  18      56.377 -16.294  24.423  1.00107.75           O
ATOM    141  N   THR A  19      58.016 -17.652  25.140  1.00 73.93           N
ATOM    142  CA  THR A  19      58.924 -16.545  25.230  1.00 73.93           C
ATOM    143  CB  THR A  19      59.315 -16.206  26.645  1.00 73.93           C
ATOM    144  OG1 THR A  19      59.873 -17.339  27.289  1.00 73.93           O
ATOM    145  CG2 THR A  19      58.072 -15.721  27.412  1.00 73.93           C
ATOM    146  C   THR A  19      60.146 -16.813  24.420  1.00 73.93           C
ATOM    147  O   THR A  19      60.431 -17.952  24.050  1.00 73.93           O
ATOM    148  N   VAL A  20      60.896 -15.737  24.097  1.00 96.38           N
ATOM    149  CA  VAL A  20      62.073 -15.941  23.311  1.00 96.38           C
ATOM    150  CB  VAL A  20      62.538 -14.741  22.570  1.00 96.38           C
ATOM    151  CG1 VAL A  20      63.785 -15.189  21.819  1.00 96.38           C
ATOM    152  CG2 VAL A  20      61.416 -14.209  21.674  1.00 96.38           C
ATOM    153  C   VAL A  20      63.182 -16.291  24.250  1.00 96.38           C
ATOM    154  O   VAL A  20      64.071 -15.484  24.530  1.00 96.38           O
ATOM    155  N   GLY A  21      63.193 -17.562  24.686  1.00 54.73           N
ATOM    156  CA  GLY A  21      64.163 -18.046  25.627  1.00 54.73           C
ATOM    157  C   GLY A  21      63.481 -18.166  26.953  1.00 54.73           C
ATOM    158  O   GLY A  21      62.436 -17.566  27.194  1.00 54.73           O
ATOM    159  N   ASN A  22      64.088 -18.945  27.865  1.00103.12           N
ATOM    160  CA  ASN A  22      63.515 -19.210  29.146  1.00103.12           C
ATOM    161  CB  ASN A  22      64.475 -20.078  29.984  1.00103.12           C
ATOM    162  CG  ASN A  22      63.830 -20.506  31.291  1.00103.12           C
ATOM    163  OD1 ASN A  22      63.267 -19.694  32.022  1.00103.12           O
ATOM    164  ND2 ASN A  22      63.926 -21.827  31.602  1.00103.12           N
ATOM    165  C   ASN A  22      63.343 -17.894  29.842  1.00103.12           C
ATOM    166  O   ASN A  22      62.331 -17.642  30.492  1.00103.12           O
ATOM    167  N   ARG A  23      64.401 -17.072  29.786  1.00196.93           N
ATOM    168  CA  ARG A  23      64.557 -15.754  30.339  1.00196.93           C
ATOM    169  CB  ARG A  23      66.020 -15.480  30.727  1.00196.93           C
ATOM    170  CG  ARG A  23      66.590 -16.570  31.643  1.00196.93           C
ATOM    171  CD  ARG A  23      66.587 -16.233  33.135  1.00196.93           C
ATOM    172  NE  ARG A  23      65.250 -15.674  33.464  1.00196.93           N
ATOM    173  CZ  ARG A  23      65.117 -14.326  33.630  1.00196.93           C
ATOM    174  NH1 ARG A  23      66.219 -13.525  33.550  1.00196.93           N
ATOM    175  NH2 ARG A  23      63.894 -13.788  33.900  1.00196.93           N
ATOM    176  C   ARG A  23      64.095 -14.625  29.445  1.00196.93           C
ATOM    177  O   ARG A  23      64.156 -13.473  29.867  1.00196.93           O
ATOM    178  N   GLY A  24      63.776 -14.870  28.156  1.00 67.85           N
ATOM    179  CA  GLY A  24      63.537 -13.772  27.239  1.00 67.85           C
ATOM    180  C   GLY A  24      62.105 -13.304  27.140  1.00 67.85           C
ATOM    181  O   GLY A  24      61.177 -13.851  27.728  1.00 67.85           O
ATOM    182  N   PRO A  25      61.941 -12.277  26.327  1.00110.95           N
ATOM    183  CA  PRO A  25      60.686 -11.590  26.099  1.00110.95           C
ATOM    184  CD  PRO A  25      63.022 -11.777  25.496  1.00110.95           C
ATOM    185  CB  PRO A  25      61.056 -10.385  25.237  1.00110.95           C
ATOM    186  CG  PRO A  25      62.336 -10.830  24.501  1.00110.95           C
ATOM    187  C   PRO A  25      59.637 -12.443  25.437  1.00110.95           C
ATOM    188  O   PRO A  25      59.982 -13.364  24.702  1.00110.95           O
ATOM    189  N   ILE A  26      58.345 -12.119  25.665  1.00129.21           N
ATOM    190  CA  ILE A  26      57.211 -12.863  25.184  1.00129.21           C
ATOM    191  CB  ILE A  26      55.942 -12.499  25.894  1.00129.21           C
ATOM    192  CG1 ILE A  26      55.600 -11.027  25.638  1.00129.21           C
ATOM    193  CG2 ILE A  26      56.113 -12.832  27.385  1.00129.21           C
ATOM    194  CD1 ILE A  26      54.238 -10.642  26.202  1.00129.21           C
ATOM    195  C   ILE A  26      57.010 -12.630  23.714  1.00129.21           C
ATOM    196  O   ILE A  26      57.308 -11.559  23.184  1.00129.21           O
ATOM    197  N   LEU A  27      56.511 -13.669  23.006  1.00 81.43           N
ATOM    198  CA  LEU A  27      56.340 -13.593  21.585  1.00 81.43           C
ATOM    199  CB  LEU A  27      56.719 -14.890  20.855  1.00 81.43           C
ATOM    200  CG  LEU A  27      58.240 -15.108  20.812  1.00 81.43           C
ATOM    201  CD1 LEU A  27      58.611 -16.433  20.130  1.00 81.43           C
ATOM    202  CD2 LEU A  27      58.920 -13.901  20.145  1.00 81.43           C
ATOM    203  C   LEU A  27      54.937 -13.213  21.215  1.00 81.43           C
ATOM    204  O   LEU A  27      53.954 -13.592  21.852  1.00 81.43           O
ATOM    205  N   LEU A  28      54.837 -12.427  20.129  1.00 69.55           N
ATOM    206  CA  LEU A  28      53.608 -11.935  19.583  1.00 69.55           C
ATOM    207  CB  LEU A  28      53.835 -10.952  18.419  1.00 69.55           C
ATOM    208  CG  LEU A  28      52.534 -10.368  17.839  1.00 69.55           C
ATOM    209  CD1 LEU A  28      51.733  -9.631  18.924  1.00 69.55           C
ATOM    210  CD2 LEU A  28      52.816  -9.473  16.620  1.00 69.55           C
ATOM    211  C   LEU A  28      52.805 -13.113  19.097  1.00 69.55           C
ATOM    212  O   LEU A  28      51.579 -13.060  19.025  1.00 69.55           O
ATOM    213  N   GLU A  29      53.505 -14.203  18.733  1.00150.50           N
ATOM    214  CA  GLU A  29      53.008 -15.442  18.184  1.00150.50           C
ATOM    215  CB  GLU A  29      54.155 -16.381  17.790  1.00150.50           C
ATOM    216  CG  GLU A  29      55.098 -15.778  16.757  1.00150.50           C
ATOM    217  CD  GLU A  29      56.310 -16.684  16.647  1.00150.50           C
ATOM    218  OE1 GLU A  29      56.855 -17.071  17.715  1.00150.50           O
ATOM    219  OE2 GLU A  29      56.709 -17.008  15.497  1.00150.50           O
ATOM    220  C   GLU A  29      52.166 -16.208  19.171  1.00150.50           C
ATOM    221  O   GLU A  29      51.462 -17.135  18.777  1.00150.50           O
ATOM    222  N   ASP A  30      52.276 -15.930  20.483  1.00 98.65           N
ATOM    223  CA  ASP A  30      51.531 -16.710  21.443  1.00 98.65           C
ATOM    224  CB  ASP A  30      51.956 -16.410  22.896  1.00 98.65           C
ATOM    225  CG  ASP A  30      51.360 -17.444  23.845  1.00 98.65           C
ATOM    226  OD1 ASP A  30      50.339 -18.083  23.478  1.00 98.65           O
ATOM    227  OD2 ASP A  30      51.925 -17.610  24.959  1.00 98.65           O
ATOM    228  C   ASP A  30      50.058 -16.425  21.307  1.00 98.65           C
ATOM    229  O   ASP A  30      49.492 -15.619  22.046  1.00 98.65           O
ATOM    230  N   TYR A  31      49.384 -17.139  20.380  1.00 65.09           N
ATOM    231  CA  TYR A  31      47.982 -16.954  20.126  1.00 65.09           C
ATOM    232  CB  TYR A  31      47.467 -17.806  18.956  1.00 65.09           C
ATOM    233  CG  TYR A  31      46.004 -17.554  18.868  1.00 65.09           C
ATOM    234  CD1 TYR A  31      45.534 -16.332  18.451  1.00 65.09           C
ATOM    235  CD2 TYR A  31      45.106 -18.544  19.191  1.00 65.09           C
ATOM    236  CE1 TYR A  31      44.183 -16.095  18.367  1.00 65.09           C
ATOM    237  CE2 TYR A  31      43.752 -18.314  19.109  1.00 65.09           C
ATOM    238  CZ  TYR A  31      43.291 -17.087  18.699  1.00 65.09           C
ATOM    239  OH  TYR A  31      41.903 -16.847  18.614  1.00 65.09           O
ATOM    240  C   TYR A  31      47.187 -17.311  21.350  1.00 65.09           C
ATOM    241  O   TYR A  31      46.233 -16.617  21.702  1.00 65.09           O
ATOM    242  N   HIS A  32      47.568 -18.401  22.044  1.00 94.87           N
ATOM    243  CA  HIS A  32      46.834 -18.849  23.196  1.00 94.87           C
ATOM    244  ND1 HIS A  32      45.488 -21.237  25.052  1.00 94.87           N
ATOM    245  CG  HIS A  32      46.664 -20.521  25.067  1.00 94.87           C
ATOM    246  CB  HIS A  32      47.427 -20.113  23.840  1.00 94.87           C
ATOM    247  NE2 HIS A  32      45.943 -20.803  27.186  1.00 94.87           N
ATOM    248  CD2 HIS A  32      46.929 -20.266  26.378  1.00 94.87           C
ATOM    249  CE1 HIS A  32      45.100 -21.375  26.347  1.00 94.87           C
ATOM    250  C   HIS A  32      46.789 -17.799  24.267  1.00 94.87           C
ATOM    251  O   HIS A  32      45.745 -17.596  24.888  1.00 94.87           O
ATOM    252  N   LEU A  33      47.924 -17.135  24.551  1.00 73.23           N
ATOM    253  CA  LEU A  33      47.962 -16.142  25.598  1.00 73.23           C
ATOM    254  CB  LEU A  33      49.391 -15.665  25.912  1.00 73.23           C
ATOM    255  CG  LEU A  33      49.487 -14.753  27.148  1.00 73.23           C
ATOM    256  CD1 LEU A  33      49.024 -15.492  28.415  1.00 73.23           C
ATOM    257  CD2 LEU A  33      50.901 -14.171  27.301  1.00 73.23           C
ATOM    258  C   LEU A  33      47.135 -14.946  25.219  1.00 73.23           C
ATOM    259  O   LEU A  33      46.313 -14.475  26.004  1.00 73.23           O
ATOM    260  N   VAL A  34      47.313 -14.449  23.977  1.00 90.78           N
ATOM    261  CA  VAL A  34      46.659 -13.254  23.517  1.00 90.78           C
ATOM    262  CB  VAL A  34      47.101 -12.841  22.143  1.00 90.78           C
ATOM    263  CG1 VAL A  34      46.732 -13.958  21.155  1.00 90.78           C
ATOM    264  CG2 VAL A  34      46.470 -11.479  21.809  1.00 90.78           C
ATOM    265  C   VAL A  34      45.174 -13.453  23.487  1.00 90.78           C
ATOM    266  O   VAL A  34      44.415 -12.552  23.841  1.00 90.78           O
ATOM    267  N   GLU A  35      44.711 -14.637  23.045  1.00 54.39           N
ATOM    268  CA  GLU A  35      43.298 -14.886  23.003  1.00 54.39           C
ATOM    269  CB  GLU A  35      42.960 -16.301  22.510  1.00 54.39           C
ATOM    270  CG  GLU A  35      41.461 -16.596  22.486  1.00 54.39           C
ATOM    271  CD  GLU A  35      41.295 -18.045  22.057  1.00 54.39           C
ATOM    272  OE1 GLU A  35      41.337 -18.935  22.949  1.00 54.39           O
ATOM    273  OE2 GLU A  35      41.133 -18.283  20.830  1.00 54.39           O
ATOM    274  C   GLU A  35      42.755 -14.811  24.399  1.00 54.39           C
ATOM    275  O   GLU A  35      41.692 -14.238  24.630  1.00 54.39           O
ATOM    276  N   LYS A  36      43.479 -15.417  25.361  1.00127.90           N
ATOM    277  CA  LYS A  36      43.102 -15.474  26.753  1.00127.90           C
ATOM    278  CB  LYS A  36      44.164 -16.239  27.578  1.00127.90           C
ATOM    279  CG  LYS A  36      43.912 -16.392  29.086  1.00127.90           C
ATOM    280  CD  LYS A  36      42.962 -17.528  29.482  1.00127.90           C
ATOM    281  CE  LYS A  36      42.785 -17.704  30.999  1.00127.90           C
ATOM    282  NZ  LYS A  36      43.926 -18.457  31.579  1.00127.90           N
ATOM    283  C   LYS A  36      43.042 -14.096  27.343  1.00127.90           C
ATOM    284  O   LYS A  36      42.043 -13.716  27.952  1.00127.90           O
ATOM    285  N   LEU A  37      44.132 -13.320  27.179  1.00 53.62           N
ATOM    286  CA  LEU A  37      44.253 -12.001  27.745  1.00 53.62           C
ATOM    287  CB  LEU A  37      45.684 -11.452  27.604  1.00 53.62           C
ATOM    288  CG  LEU A  37      46.702 -12.298  28.393  1.00 53.62           C
ATOM    289  CD1 LEU A  37      48.126 -11.726  28.296  1.00 53.62           C
ATOM    290  CD2 LEU A  37      46.231 -12.505  29.841  1.00 53.62           C
ATOM    291  C   LEU A  37      43.294 -11.066  27.074  1.00 53.62           C
ATOM    292  O   LEU A  37      42.659 -10.243  27.732  1.00 53.62           O
ATOM    293  N   ALA A  38      43.153 -11.177  25.740  1.00 37.86           N
ATOM    294  CA  ALA A  38      42.310 -10.283  24.998  1.00 37.86           C
ATOM    295  CB  ALA A  38      42.358 -10.545  23.483  1.00 37.86           C
ATOM    296  C   ALA A  38      40.882 -10.426  25.446  1.00 37.86           C
ATOM    297  O   ALA A  38      40.156  -9.438  25.536  1.00 37.86           O
ATOM    298  N   ASN A  39      40.417 -11.661  25.706  1.00 68.06           N
ATOM    299  CA  ASN A  39      39.056 -11.857  26.132  1.00 68.06           C
ATOM    300  CB  ASN A  39      38.672 -13.346  26.176  1.00 68.06           C
ATOM    301  CG  ASN A  39      38.756 -13.879  24.750  1.00 68.06           C
ATOM    302  OD1 ASN A  39      38.516 -13.151  23.788  1.00 68.06           O
ATOM    303  ND2 ASN A  39      39.113 -15.184  24.605  1.00 68.06           N
ATOM    304  C   ASN A  39      38.861 -11.279  27.505  1.00 68.06           C
ATOM    305  O   ASN A  39      37.856 -10.625  27.783  1.00 68.06           O
ATOM    306  N   PHE A  40      39.848 -11.483  28.396  1.00 80.34           N
ATOM    307  CA  PHE A  40      39.804 -11.022  29.758  1.00 80.34           C
ATOM    308  CB  PHE A  40      41.100 -11.370  30.511  1.00 80.34           C
ATOM    309  CG  PHE A  40      41.063 -10.750  31.863  1.00 80.34           C
ATOM    310  CD1 PHE A  40      40.365 -11.336  32.894  1.00 80.34           C
ATOM    311  CD2 PHE A  40      41.749  -9.582  32.098  1.00 80.34           C
ATOM    312  CE1 PHE A  40      40.344 -10.752  34.139  1.00 80.34           C
ATOM    313  CE2 PHE A  40      41.731  -8.996  33.341  1.00 80.34           C
ATOM    314  CZ  PHE A  40      41.028  -9.581  34.367  1.00 80.34           C
ATOM    315  C   PHE A  40      39.646  -9.534  29.745  1.00 80.34           C
ATOM    316  O   PHE A  40      38.872  -8.977  30.522  1.00 80.34           O
ATOM    317  N   ASP A  41      40.365  -8.863  28.830  1.00102.39           N
ATOM    318  CA  ASP A  41      40.383  -7.431  28.705  1.00102.39           C
ATOM    319  CB  ASP A  41      41.322  -6.973  27.574  1.00102.39           C
ATOM    320  CG  ASP A  41      42.757  -7.319  27.960  1.00102.39           C
ATOM    321  OD1 ASP A  41      42.969  -7.712  29.138  1.00102.39           O
ATOM    322  OD2 ASP A  41      43.657  -7.182  27.089  1.00102.39           O
ATOM    323  C   ASP A  41      39.006  -6.909  28.382  1.00102.39           C
ATOM    324  O   ASP A  41      38.698  -5.756  28.676  1.00102.39           O
ATOM    325  N   ARG A  42      38.213  -7.705  27.640  1.00176.45           N
ATOM    326  CA  ARG A  42      36.881  -7.448  27.145  1.00176.45           C
ATOM    327  CB  ARG A  42      36.669  -7.994  25.726  1.00176.45           C
ATOM    328  CG  ARG A  42      37.428  -7.119  24.723  1.00176.45           C
ATOM    329  CD  ARG A  42      37.506  -7.658  23.297  1.00176.45           C
ATOM    330  NE  ARG A  42      38.280  -6.653  22.513  1.00176.45           N
ATOM    331  CZ  ARG A  42      39.639  -6.613  22.624  1.00176.45           C
ATOM    332  NH1 ARG A  42      40.270  -7.443  23.504  1.00176.45           N
ATOM    333  NH2 ARG A  42      40.366  -5.739  21.868  1.00176.45           N
ATOM    334  C   ARG A  42      35.712  -7.826  28.021  1.00176.45           C
ATOM    335  O   ARG A  42      34.562  -7.675  27.606  1.00176.45           O
ATOM    336  N   GLU A  43      35.960  -8.432  29.189  1.00141.76           N
ATOM    337  CA  GLU A  43      34.969  -9.034  30.041  1.00141.76           C
ATOM    338  CB  GLU A  43      35.686  -9.550  31.299  1.00141.76           C
ATOM    339  CG  GLU A  43      34.995 -10.660  32.071  1.00141.76           C
ATOM    340  CD  GLU A  43      36.078 -11.286  32.944  1.00141.76           C
ATOM    341  OE1 GLU A  43      36.908 -12.053  32.385  1.00141.76           O
ATOM    342  OE2 GLU A  43      36.101 -10.996  34.170  1.00141.76           O
ATOM    343  C   GLU A  43      33.877  -8.080  30.457  1.00141.76           C
ATOM    344  O   GLU A  43      32.712  -8.477  30.520  1.00141.76           O
ATOM    345  N   ARG A  44      34.213  -6.808  30.751  1.00182.22           N
ATOM    346  CA  ARG A  44      33.280  -5.865  31.317  1.00182.22           C
ATOM    347  CB  ARG A  44      34.001  -4.743  32.092  1.00182.22           C
ATOM    348  CG  ARG A  44      35.011  -5.244  33.134  1.00182.22           C
ATOM    349  CD  ARG A  44      34.486  -5.314  34.573  1.00182.22           C
ATOM    350  NE  ARG A  44      33.931  -6.681  34.787  1.00182.22           N
ATOM    351  CZ  ARG A  44      34.728  -7.707  35.211  1.00182.22           C
ATOM    352  NH1 ARG A  44      36.034  -7.488  35.545  1.00182.22           N
ATOM    353  NH2 ARG A  44      34.208  -8.967  35.289  1.00182.22           N
ATOM    354  C   ARG A  44      32.407  -5.189  30.292  1.00182.22           C
ATOM    355  O   ARG A  44      32.800  -4.950  29.150  1.00182.22           O
ATOM    356  N   ILE A  45      31.171  -4.850  30.731  1.00 54.56           N
ATOM    357  CA  ILE A  45      30.179  -4.131  29.977  1.00 54.56           C
ATOM    358  CB  ILE A  45      28.984  -4.962  29.602  1.00 54.56           C
ATOM    359  CG1 ILE A  45      28.229  -5.428  30.857  1.00 54.56           C
ATOM    360  CG2 ILE A  45      29.466  -6.116  28.706  1.00 54.56           C
ATOM    361  CD1 ILE A  45      26.846  -6.005  30.557  1.00 54.56           C
ATOM    362  C   ILE A  45      29.701  -3.050  30.903  1.00 54.56           C
ATOM    363  O   ILE A  45      29.993  -3.100  32.096  1.00 54.56           O
ATOM    364  N   PRO A  46      29.004  -2.054  30.420  1.00152.92           N
ATOM    365  CA  PRO A  46      28.536  -0.981  31.253  1.00152.92           C
ATOM    366  CD  PRO A  46      28.947  -1.728  29.008  1.00152.92           C
ATOM    367  CB  PRO A  46      27.992   0.087  30.300  1.00152.92           C
ATOM    368  CG  PRO A  46      27.879  -0.626  28.937  1.00152.92           C
ATOM    369  C   PRO A  46      27.535  -1.467  32.255  1.00152.92           C
ATOM    370  O   PRO A  46      26.768  -2.377  31.953  1.00152.92           O
ATOM    371  N   GLU A  47      27.549  -0.874  33.463  1.00 60.47           N
ATOM    372  CA  GLU A  47      26.617  -1.153  34.518  1.00 60.47           C
ATOM    373  CB  GLU A  47      27.124  -0.629  35.869  1.00 60.47           C
ATOM    374  CG  GLU A  47      27.473   0.859  35.799  1.00 60.47           C
ATOM    375  CD  GLU A  47      27.981   1.313  37.156  1.00 60.47           C
ATOM    376  OE1 GLU A  47      28.789   0.566  37.770  1.00 60.47           O
ATOM    377  OE2 GLU A  47      27.570   2.419  37.596  1.00 60.47           O
ATOM    378  C   GLU A  47      25.363  -0.395  34.194  1.00 60.47           C
ATOM    379  O   GLU A  47      25.375   0.497  33.347  1.00 60.47           O
ATOM    380  N   ARG A  48      24.234  -0.753  34.847  1.00117.57           N
ATOM    381  CA  ARG A  48      22.993  -0.058  34.623  1.00117.57           C
ATOM    382  CB  ARG A  48      21.797  -0.674  35.376  1.00117.57           C
ATOM    383  CG  ARG A  48      21.215  -1.895  34.660  1.00117.57           C
ATOM    384  CD  ARG A  48      20.181  -2.690  35.458  1.00117.57           C
ATOM    385  NE  ARG A  48      20.913  -3.711  36.255  1.00117.57           N
ATOM    386  CZ  ARG A  48      21.360  -4.836  35.623  1.00117.57           C
ATOM    387  NH1 ARG A  48      21.261  -4.937  34.267  1.00117.57           N
ATOM    388  NH2 ARG A  48      21.906  -5.865  36.330  1.00117.57           N
ATOM    389  C   ARG A  48      23.176   1.365  35.050  1.00117.57           C
ATOM    390  O   ARG A  48      23.861   1.648  36.032  1.00117.57           O
ATOM    391  N   VAL A  49      22.551   2.306  34.308  1.00111.49           N
ATOM    392  CA  VAL A  49      22.733   3.702  34.591  1.00111.49           C
ATOM    393  CB  VAL A  49      22.008   4.619  33.644  1.00111.49           C
ATOM    394  CG1 VAL A  49      20.493   4.452  33.824  1.00111.49           C
ATOM    395  CG2 VAL A  49      22.527   6.050  33.865  1.00111.49           C
ATOM    396  C   VAL A  49      22.284   3.936  35.999  1.00111.49           C
ATOM    397  O   VAL A  49      22.904   4.703  36.735  1.00111.49           O
ATOM    398  N   VAL A  50      21.178   3.287  36.406  1.00 59.19           N
ATOM    399  CA  VAL A  50      20.748   3.324  37.777  1.00 59.19           C
ATOM    400  CB  VAL A  50      19.550   4.202  38.010  1.00 59.19           C
ATOM    401  CG1 VAL A  50      19.963   5.666  37.774  1.00 59.19           C
ATOM    402  CG2 VAL A  50      18.411   3.739  37.082  1.00 59.19           C
ATOM    403  C   VAL A  50      20.378   1.903  38.115  1.00 59.19           C
ATOM    404  O   VAL A  50      20.175   1.082  37.223  1.00 59.19           O
ATOM    405  N   HIS A  51      20.282   1.575  39.420  1.00 72.98           N
ATOM    406  CA  HIS A  51      19.958   0.243  39.873  1.00 72.98           C
ATOM    407  ND1 HIS A  51      16.665  -0.061  40.917  1.00 72.98           N
ATOM    408  CG  HIS A  51      17.427   0.416  39.873  1.00 72.98           C
ATOM    409  CB  HIS A  51      18.627  -0.287  39.320  1.00 72.98           C
ATOM    410  NE2 HIS A  51      15.760   1.874  40.295  1.00 72.98           N
ATOM    411  CD2 HIS A  51      16.862   1.597  39.505  1.00 72.98           C
ATOM    412  CE1 HIS A  51      15.681   0.850  41.127  1.00 72.98           C
ATOM    413  C   HIS A  51      21.002  -0.742  39.450  1.00 72.98           C
ATOM    414  O   HIS A  51      20.680  -1.897  39.178  1.00 72.98           O
ATOM    415  N   ALA A  52      22.281  -0.323  39.417  1.00 45.09           N
ATOM    416  CA  ALA A  52      23.370  -1.178  39.029  1.00 45.09           C
ATOM    417  CB  ALA A  52      24.710  -0.427  38.931  1.00 45.09           C
ATOM    418  C   ALA A  52      23.544  -2.304  40.021  1.00 45.09           C
ATOM    419  O   ALA A  52      23.849  -3.430  39.633  1.00 45.09           O
ATOM    420  N   ARG A  53      23.371  -2.038  41.334  1.00111.07           N
ATOM    421  CA  ARG A  53      23.588  -3.056  42.339  1.00111.07           C
ATOM    422  CB  ARG A  53      23.896  -2.439  43.716  1.00111.07           C
ATOM    423  CG  ARG A  53      24.595  -3.367  44.711  1.00111.07           C
ATOM    424  CD  ARG A  53      23.684  -4.351  45.440  1.00111.07           C
ATOM    425  NE  ARG A  53      24.567  -5.136  46.345  1.00111.07           N
ATOM    426  CZ  ARG A  53      25.272  -6.196  45.854  1.00111.07           C
ATOM    427  NH1 ARG A  53      25.148  -6.546  44.542  1.00111.07           N
ATOM    428  NH2 ARG A  53      26.108  -6.903  46.666  1.00111.07           N
ATOM    429  C   ARG A  53      22.335  -3.883  42.476  1.00111.07           C
ATOM    430  O   ARG A  53      21.272  -3.345  42.781  1.00111.07           O
ATOM    431  N   GLY A  54      22.412  -5.225  42.287  1.00 42.27           N
ATOM    432  CA  GLY A  54      21.182  -5.981  42.359  1.00 42.27           C
ATOM    433  C   GLY A  54      21.388  -7.470  42.468  1.00 42.27           C
ATOM    434  O   GLY A  54      22.505  -7.981  42.401  1.00 42.27           O
ATOM    435  N   ALA A  55      20.258  -8.203  42.648  1.00 47.62           N
ATOM    436  CA  ALA A  55      20.257  -9.637  42.789  1.00 47.62           C
ATOM    437  CB  ALA A  55      20.117 -10.106  44.249  1.00 47.62           C
ATOM    438  C   ALA A  55      19.092 -10.203  42.031  1.00 47.62           C
ATOM    439  O   ALA A  55      17.980  -9.680  42.092  1.00 47.62           O
ATOM    440  N   SER A  56      19.312 -11.343  41.338  1.00 87.51           N
ATOM    441  CA  SER A  56      18.313 -11.902  40.469  1.00 87.51           C
ATOM    442  CB  SER A  56      18.763 -11.757  39.011  1.00 87.51           C
ATOM    443  OG  SER A  56      17.830 -12.365  38.145  1.00 87.51           O
ATOM    444  C   SER A  56      18.110 -13.370  40.747  1.00 87.51           C
ATOM    445  O   SER A  56      19.050 -14.090  41.088  1.00 87.51           O
ATOM    446  N   ALA A  57      16.850 -13.854  40.600  1.00 41.96           N
ATOM    447  CA  ALA A  57      16.570 -15.252  40.816  1.00 41.96           C
ATOM    448  CB  ALA A  57      16.203 -15.590  42.271  1.00 41.96           C
ATOM    449  C   ALA A  57      15.416 -15.680  39.960  1.00 41.96           C
ATOM    450  O   ALA A  57      14.605 -14.864  39.524  1.00 41.96           O
ATOM    451  N   LYS A  58      15.328 -17.002  39.694  1.00 96.04           N
ATOM    452  CA  LYS A  58      14.284 -17.537  38.866  1.00 96.04           C
ATOM    453  CB  LYS A  58      14.778 -18.610  37.878  1.00 96.04           C
ATOM    454  CG  LYS A  58      15.183 -19.951  38.494  1.00 96.04           C
ATOM    455  CD  LYS A  58      15.395 -21.019  37.415  1.00 96.04           C
ATOM    456  CE  LYS A  58      15.512 -22.452  37.932  1.00 96.04           C
ATOM    457  NZ  LYS A  58      15.579 -23.396  36.794  1.00 96.04           N
ATOM    458  C   LYS A  58      13.203 -18.118  39.727  1.00 96.04           C
ATOM    459  O   LYS A  58      13.437 -18.480  40.880  1.00 96.04           O
ATOM    460  N   GLY A  59      11.971 -18.207  39.175  1.00 28.01           N
ATOM    461  CA  GLY A  59      10.874 -18.751  39.927  1.00 28.01           C
ATOM    462  C   GLY A  59       9.687 -18.924  39.030  1.00 28.01           C
ATOM    463  O   GLY A  59       9.803 -18.966  37.806  1.00 28.01           O
ATOM    464  N   PHE A  60       8.493 -19.060  39.643  1.00 43.41           N
ATOM    465  CA  PHE A  60       7.304 -19.254  38.867  1.00 43.41           C
ATOM    466  CB  PHE A  60       6.828 -20.714  38.869  1.00 43.41           C
ATOM    467  CG  PHE A  60       7.913 -21.492  38.207  1.00 43.41           C
ATOM    468  CD1 PHE A  60       8.983 -21.960  38.935  1.00 43.41           C
ATOM    469  CD2 PHE A  60       7.868 -21.740  36.856  1.00 43.41           C
ATOM    470  CE1 PHE A  60       9.987 -22.675  38.324  1.00 43.41           C
ATOM    471  CE2 PHE A  60       8.868 -22.453  36.239  1.00 43.41           C
ATOM    472  CZ  PHE A  60       9.931 -22.923  36.973  1.00 43.41           C
ATOM    473  C   PHE A  60       6.216 -18.402  39.440  1.00 43.41           C
ATOM    474  O   PHE A  60       6.214 -18.086  40.629  1.00 43.41           O
ATOM    475  N   PHE A  61       5.266 -17.981  38.580  1.00 62.14           N
ATOM    476  CA  PHE A  61       4.143 -17.199  39.019  1.00 62.14           C
ATOM    477  CB  PHE A  61       3.977 -15.902  38.204  1.00 62.14           C
ATOM    478  CG  PHE A  61       2.761 -15.165  38.655  1.00 62.14           C
ATOM    479  CD1 PHE A  61       2.768 -14.408  39.805  1.00 62.14           C
ATOM    480  CD2 PHE A  61       1.613 -15.214  37.896  1.00 62.14           C
ATOM    481  CE1 PHE A  61       1.638 -13.730  40.199  1.00 62.14           C
ATOM    482  CE2 PHE A  61       0.481 -14.538  38.284  1.00 62.14           C
ATOM    483  CZ  PHE A  61       0.493 -13.791  39.439  1.00 62.14           C
ATOM    484  C   PHE A  61       2.921 -18.048  38.826  1.00 62.14           C
ATOM    485  O   PHE A  61       2.757 -18.671  37.779  1.00 62.14           O
ATOM    486  N   GLU A  62       2.035 -18.111  39.847  1.00 51.49           N
ATOM    487  CA  GLU A  62       0.856 -18.932  39.759  1.00 51.49           C
ATOM    488  CB  GLU A  62       0.777 -19.998  40.867  1.00 51.49           C
ATOM    489  CG  GLU A  62      -0.398 -20.971  40.717  1.00 51.49           C
ATOM    490  CD  GLU A  62      -0.425 -21.879  41.943  1.00 51.49           C
ATOM    491  OE1 GLU A  62      -0.891 -21.407  43.015  1.00 51.49           O
ATOM    492  OE2 GLU A  62       0.016 -23.054  41.827  1.00 51.49           O
ATOM    493  C   GLU A  62      -0.347 -18.055  39.926  1.00 51.49           C
ATOM    494  O   GLU A  62      -0.457 -17.319  40.906  1.00 51.49           O
ATOM    495  N   VAL A  63      -1.305 -18.125  38.979  1.00134.67           N
ATOM    496  CA  VAL A  63      -2.451 -17.266  39.101  1.00134.67           C
ATOM    497  CB  VAL A  63      -2.957 -16.777  37.774  1.00134.67           C
ATOM    498  CG1 VAL A  63      -3.272 -17.988  36.886  1.00134.67           C
ATOM    499  CG2 VAL A  63      -4.147 -15.835  38.010  1.00134.67           C
ATOM    500  C   VAL A  63      -3.547 -17.961  39.857  1.00134.67           C
ATOM    501  O   VAL A  63      -3.955 -19.073  39.523  1.00134.67           O
ATOM    502  N   THR A  64      -3.958 -17.347  40.989  1.00124.92           N
ATOM    503  CA  THR A  64      -5.041 -17.822  41.804  1.00124.92           C
ATOM    504  CB  THR A  64      -4.975 -17.308  43.214  1.00124.92           C
ATOM    505  OG1 THR A  64      -6.020 -17.872  43.993  1.00124.92           O
ATOM    506  CG2 THR A  64      -5.073 -15.774  43.203  1.00124.92           C
ATOM    507  C   THR A  64      -6.386 -17.455  41.246  1.00124.92           C
ATOM    508  O   THR A  64      -7.273 -18.302  41.143  1.00124.92           O
ATOM    509  N   HIS A  65      -6.572 -16.177  40.846  1.00 82.15           N
ATOM    510  CA  HIS A  65      -7.882 -15.760  40.428  1.00 82.15           C
ATOM    511  ND1 HIS A  65      -8.264 -15.470  43.795  1.00 82.15           N
ATOM    512  CG  HIS A  65      -9.015 -15.382  42.644  1.00 82.15           C
ATOM    513  CB  HIS A  65      -8.552 -14.743  41.369  1.00 82.15           C
ATOM    514  NE2 HIS A  65     -10.204 -16.470  44.223  1.00 82.15           N
ATOM    515  CD2 HIS A  65     -10.197 -15.998  42.923  1.00 82.15           C
ATOM    516  CE1 HIS A  65      -9.023 -16.129  44.707  1.00 82.15           C
ATOM    517  C   HIS A  65      -7.828 -15.158  39.067  1.00 82.15           C
ATOM    518  O   HIS A  65      -6.920 -14.400  38.728  1.00 82.15           O
ATOM    519  N   ASP A  66      -8.843 -15.500  38.253  1.00 90.75           N
ATOM    520  CA  ASP A  66      -8.944 -15.047  36.901  1.00 90.75           C
ATOM    521  CB  ASP A  66     -10.066 -15.755  36.132  1.00 90.75           C
ATOM    522  CG  ASP A  66      -9.626 -17.205  36.024  1.00 90.75           C
ATOM    523  OD1 ASP A  66      -8.408 -17.449  36.226  1.00 90.75           O
ATOM    524  OD2 ASP A  66     -10.483 -18.083  35.738  1.00 90.75           O
ATOM    525  C   ASP A  66      -9.196 -13.568  36.875  1.00 90.75           C
ATOM    526  O   ASP A  66      -9.953 -13.031  37.680  1.00 90.75           O
ATOM    527  N   ILE A  67      -8.419 -12.903  35.997  1.00173.50           N
ATOM    528  CA  ILE A  67      -8.307 -11.541  35.544  1.00173.50           C
ATOM    529  CB  ILE A  67      -6.906 -11.264  35.033  1.00173.50           C
ATOM    530  CG1 ILE A  67      -5.921 -11.350  36.210  1.00173.50           C
ATOM    531  CG2 ILE A  67      -6.830  -9.904  34.319  1.00173.50           C
ATOM    532  CD1 ILE A  67      -6.208 -10.317  37.300  1.00173.50           C
ATOM    533  C   ILE A  67      -9.326 -11.166  34.490  1.00173.50           C
ATOM    534  O   ILE A  67      -9.548  -9.983  34.226  1.00173.50           O
ATOM    535  N   SER A  68      -9.928 -12.161  33.812  1.00101.58           N
ATOM    536  CA  SER A  68     -10.693 -11.981  32.600  1.00101.58           C
ATOM    537  CB  SER A  68     -11.558 -13.207  32.262  1.00101.58           C
ATOM    538  OG  SER A  68     -12.285 -12.972  31.065  1.00101.58           O
ATOM    539  C   SER A  68     -11.625 -10.813  32.656  1.00101.58           C
ATOM    540  O   SER A  68     -11.866 -10.179  31.628  1.00101.58           O
ATOM    541  N   HIS A  69     -12.176 -10.477  33.831  1.00 88.14           N
ATOM    542  CA  HIS A  69     -13.076  -9.364  33.856  1.00 88.14           C
ATOM    543  ND1 HIS A  69     -13.567 -11.345  36.441  1.00 88.14           N
ATOM    544  CG  HIS A  69     -14.260 -10.293  35.883  1.00 88.14           C
ATOM    545  CB  HIS A  69     -13.597  -9.091  35.276  1.00 88.14           C
ATOM    546  NE2 HIS A  69     -15.728 -11.829  36.643  1.00 88.14           N
ATOM    547  CD2 HIS A  69     -15.579 -10.605  36.015  1.00 88.14           C
ATOM    548  CE1 HIS A  69     -14.493 -12.235  36.880  1.00 88.14           C
ATOM    549  C   HIS A  69     -12.326  -8.139  33.397  1.00 88.14           C
ATOM    550  O   HIS A  69     -12.825  -7.375  32.572  1.00 88.14           O
ATOM    551  N   LEU A  70     -11.135  -7.900  33.984  1.00127.69           N
ATOM    552  CA  LEU A  70     -10.265  -6.779  33.718  1.00127.69           C
ATOM    553  CB  LEU A  70      -9.280  -6.522  34.873  1.00127.69           C
ATOM    554  CG  LEU A  70      -9.955  -6.276  36.238  1.00127.69           C
ATOM    555  CD1 LEU A  70     -10.868  -5.039  36.208  1.00127.69           C
ATOM    556  CD2 LEU A  70     -10.662  -7.542  36.747  1.00127.69           C
ATOM    557  C   LEU A  70      -9.418  -6.876  32.472  1.00127.69           C
ATOM    558  O   LEU A  70      -9.216  -5.868  31.791  1.00127.69           O
ATOM    559  N   THR A  71      -8.840  -8.064  32.174  1.00 96.51           N
ATOM    560  CA  THR A  71      -7.905  -8.129  31.079  1.00 96.51           C
ATOM    561  CB  THR A  71      -6.469  -8.147  31.523  1.00 96.51           C
ATOM    562  OG1 THR A  71      -6.169  -7.006  32.297  1.00 96.51           O
ATOM    563  CG2 THR A  71      -5.553  -8.140  30.296  1.00 96.51           C
ATOM    564  C   THR A  71      -8.055  -9.410  30.324  1.00 96.51           C
ATOM    565  O   THR A  71      -8.430 -10.448  30.865  1.00 96.51           O
ATOM    566  N   CYS A  72      -7.777  -9.315  29.011  1.00 98.69           N
ATOM    567  CA  CYS A  72      -7.712 -10.361  28.033  1.00 98.69           C
ATOM    568  CB  CYS A  72      -7.993  -9.891  26.593  1.00 98.69           C
ATOM    569  SG  CYS A  72      -6.731  -8.769  25.940  1.00 98.69           S
ATOM    570  C   CYS A  72      -6.374 -11.051  28.069  1.00 98.69           C
ATOM    571  O   CYS A  72      -6.133 -11.935  27.250  1.00 98.69           O
ATOM    572  N   ALA A  73      -5.421 -10.592  28.913  1.00 73.10           N
ATOM    573  CA  ALA A  73      -4.102 -11.176  28.956  1.00 73.10           C
ATOM    574  CB  ALA A  73      -3.243 -10.649  30.118  1.00 73.10           C
ATOM    575  C   ALA A  73      -4.242 -12.663  29.092  1.00 73.10           C
ATOM    576  O   ALA A  73      -4.968 -13.172  29.944  1.00 73.10           O
ATOM    577  N   ASP A  74      -3.497 -13.391  28.237  1.00 92.56           N
ATOM    578  CA  ASP A  74      -3.614 -14.814  28.062  1.00 92.56           C
ATOM    579  CB  ASP A  74      -2.654 -15.307  26.959  1.00 92.56           C
ATOM    580  CG  ASP A  74      -3.100 -16.656  26.411  1.00 92.56           C
ATOM    581  OD1 ASP A  74      -3.751 -17.433  27.159  1.00 92.56           O
ATOM    582  OD2 ASP A  74      -2.792 -16.921  25.218  1.00 92.56           O
ATOM    583  C   ASP A  74      -3.313 -15.572  29.326  1.00 92.56           C
ATOM    584  O   ASP A  74      -4.084 -16.451  29.713  1.00 92.56           O
ATOM    585  N   PHE A  75      -2.207 -15.246  30.030  1.00116.66           N
ATOM    586  CA  PHE A  75      -1.837 -16.047  31.172  1.00116.66           C
ATOM    587  CB  PHE A  75      -0.366 -15.931  31.645  1.00116.66           C
ATOM    588  CG  PHE A  75       0.004 -14.640  32.293  1.00116.66           C
ATOM    589  CD1 PHE A  75       0.163 -13.487  31.561  1.00116.66           C
ATOM    590  CD2 PHE A  75       0.255 -14.608  33.647  1.00116.66           C
ATOM    591  CE1 PHE A  75       0.527 -12.314  32.179  1.00116.66           C
ATOM    592  CE2 PHE A  75       0.621 -13.439  34.270  1.00116.66           C
ATOM    593  CZ  PHE A  75       0.757 -12.287  33.534  1.00116.66           C
ATOM    594  C   PHE A  75      -2.791 -15.872  32.323  1.00116.66           C
ATOM    595  O   PHE A  75      -2.903 -16.750  33.179  1.00116.66           O
ATOM    596  N   LEU A  76      -3.439 -14.691  32.403  1.00149.43           N
ATOM    597  CA  LEU A  76      -4.383 -14.287  33.420  1.00149.43           C
ATOM    598  CB  LEU A  76      -4.665 -12.773  33.425  1.00149.43           C
ATOM    599  CG  LEU A  76      -3.473 -11.910  33.882  1.00149.43           C
ATOM    600  CD1 LEU A  76      -3.049 -12.276  35.314  1.00149.43           C
ATOM    601  CD2 LEU A  76      -2.313 -11.943  32.876  1.00149.43           C
ATOM    602  C   LEU A  76      -5.727 -14.966  33.310  1.00149.43           C
ATOM    603  O   LEU A  76      -6.564 -14.816  34.199  1.00149.43           O
ATOM    604  N   ARG A  77      -6.030 -15.618  32.175  1.00 81.88           N
ATOM    605  CA  ARG A  77      -7.344 -16.155  31.919  1.00 81.88           C
ATOM    606  CB  ARG A  77      -7.427 -16.813  30.531  1.00 81.88           C
ATOM    607  CG  ARG A  77      -7.331 -15.811  29.378  1.00 81.88           C
ATOM    608  CD  ARG A  77      -7.332 -16.458  27.991  1.00 81.88           C
ATOM    609  NE  ARG A  77      -7.519 -15.367  26.993  1.00 81.88           N
ATOM    610  CZ  ARG A  77      -7.876 -15.665  25.709  1.00 81.88           C
ATOM    611  NH1 ARG A  77      -7.962 -16.966  25.305  1.00 81.88           N
ATOM    612  NH2 ARG A  77      -8.163 -14.659  24.832  1.00 81.88           N
ATOM    613  C   ARG A  77      -7.812 -17.178  32.921  1.00 81.88           C
ATOM    614  O   ARG A  77      -8.945 -17.070  33.386  1.00 81.88           O
ATOM    615  N   ALA A  78      -6.996 -18.188  33.295  1.00 42.35           N
ATOM    616  CA  ALA A  78      -7.549 -19.198  34.162  1.00 42.35           C
ATOM    617  CB  ALA A  78      -7.761 -20.557  33.471  1.00 42.35           C
ATOM    618  C   ALA A  78      -6.650 -19.447  35.329  1.00 42.35           C
ATOM    619  O   ALA A  78      -5.424 -19.374  35.255  1.00 42.35           O
ATOM    620  N   PRO A  79      -7.288 -19.761  36.420  1.00 92.57           N
ATOM    621  CA  PRO A  79      -6.622 -20.026  37.663  1.00 92.57           C
ATOM    622  CD  PRO A  79      -8.648 -20.271  36.399  1.00 92.57           C
ATOM    623  CB  PRO A  79      -7.745 -20.334  38.648  1.00 92.57           C
ATOM    624  CG  PRO A  79      -8.824 -20.978  37.754  1.00 92.57           C
ATOM    625  C   PRO A  79      -5.754 -21.232  37.487  1.00 92.57           C
ATOM    626  O   PRO A  79      -6.106 -22.106  36.695  1.00 92.57           O
ATOM    627  N   GLY A  80      -4.613 -21.295  38.200  1.00 26.22           N
ATOM    628  CA  GLY A  80      -3.799 -22.475  38.175  1.00 26.22           C
ATOM    629  C   GLY A  80      -2.730 -22.386  37.130  1.00 26.22           C
ATOM    630  O   GLY A  80      -1.845 -23.238  37.090  1.00 26.22           O
ATOM    631  N   VAL A  81      -2.757 -21.362  36.258  1.00 29.50           N
ATOM    632  CA  VAL A  81      -1.738 -21.305  35.248  1.00 29.50           C
ATOM    633  CB  VAL A  81      -2.027 -20.327  34.146  1.00 29.50           C
ATOM    634  CG1 VAL A  81      -0.820 -20.285  33.192  1.00 29.50           C
ATOM    635  CG2 VAL A  81      -3.345 -20.734  33.468  1.00 29.50           C
ATOM    636  C   VAL A  81      -0.456 -20.881  35.896  1.00 29.50           C
ATOM    637  O   VAL A  81      -0.450 -20.028  36.782  1.00 29.50           O
ATOM    638  N   GLN A  82       0.669 -21.490  35.464  1.00 42.39           N
ATOM    639  CA  GLN A  82       1.954 -21.171  36.021  1.00 42.39           C
ATOM    640  CB  GLN A  82       2.692 -22.414  36.552  1.00 42.39           C
ATOM    641  CG  GLN A  82       1.941 -23.131  37.679  1.00 42.39           C
ATOM    642  CD  GLN A  82       2.728 -24.376  38.067  1.00 42.39           C
ATOM    643  OE1 GLN A  82       2.150 -25.394  38.447  1.00 42.39           O
ATOM    644  NE2 GLN A  82       4.083 -24.298  37.975  1.00 42.39           N
ATOM    645  C   GLN A  82       2.795 -20.601  34.920  1.00 42.39           C
ATOM    646  O   GLN A  82       2.794 -21.104  33.797  1.00 42.39           O
ATOM    647  N   THR A  83       3.532 -19.513  35.218  1.00107.03           N
ATOM    648  CA  THR A  83       4.371 -18.906  34.225  1.00107.03           C
ATOM    649  CB  THR A  83       3.897 -17.538  33.844  1.00107.03           C
ATOM    650  OG1 THR A  83       3.925 -16.683  34.978  1.00107.03           O
ATOM    651  CG2 THR A  83       2.459 -17.651  33.306  1.00107.03           C
ATOM    652  C   THR A  83       5.745 -18.754  34.806  1.00107.03           C
ATOM    653  O   THR A  83       5.901 -18.332  35.951  1.00107.03           O
ATOM    654  N   PRO A  84       6.761 -19.087  34.052  1.00102.08           N
ATOM    655  CA  PRO A  84       8.080 -18.898  34.584  1.00102.08           C
ATOM    656  CD  PRO A  84       6.695 -20.275  33.214  1.00102.08           C
ATOM    657  CB  PRO A  84       9.015 -19.721  33.705  1.00102.08           C
ATOM    658  CG  PRO A  84       8.113 -20.875  33.231  1.00102.08           C
ATOM    659  C   PRO A  84       8.400 -17.443  34.679  1.00102.08           C
ATOM    660  O   PRO A  84       7.939 -16.674  33.836  1.00102.08           O
ATOM    661  N   VAL A  85       9.179 -17.051  35.707  1.00 48.88           N
ATOM    662  CA  VAL A  85       9.525 -15.675  35.905  1.00 48.88           C
ATOM    663  CB  VAL A  85       8.813 -15.044  37.069  1.00 48.88           C
ATOM    664  CG1 VAL A  85       7.295 -15.115  36.833  1.00 48.88           C
ATOM    665  CG2 VAL A  85       9.280 -15.738  38.363  1.00 48.88           C
ATOM    666  C   VAL A  85      10.975 -15.603  36.270  1.00 48.88           C
ATOM    667  O   VAL A  85      11.562 -16.564  36.770  1.00 48.88           O
ATOM    668  N   ILE A  86      11.587 -14.438  35.983  1.00155.39           N
ATOM    669  CA  ILE A  86      12.935 -14.159  36.370  1.00155.39           C
ATOM    670  CB  ILE A  86      13.842 -14.057  35.164  1.00155.39           C
ATOM    671  CG1 ILE A  86      15.298 -14.245  35.579  1.00155.39           C
ATOM    672  CG2 ILE A  86      13.582 -12.734  34.425  1.00155.39           C
ATOM    673  CD1 ILE A  86      15.711 -13.211  36.604  1.00155.39           C
ATOM    674  C   ILE A  86      12.829 -12.841  37.100  1.00155.39           C
ATOM    675  O   ILE A  86      12.175 -11.916  36.620  1.00155.39           O
ATOM    676  N   VAL A  87      13.438 -12.712  38.299  1.00 50.24           N
ATOM    677  CA  VAL A  87      13.248 -11.493  39.045  1.00 50.24           C
ATOM    678  CB  VAL A  87      12.513 -11.715  40.337  1.00 50.24           C
ATOM    679  CG1 VAL A  87      12.410 -10.378  41.093  1.00 50.24           C
ATOM    680  CG2 VAL A  87      11.153 -12.357  40.021  1.00 50.24           C
ATOM    681  C   VAL A  87      14.579 -10.887  39.393  1.00 50.24           C
ATOM    682  O   VAL A  87      15.582 -11.591  39.510  1.00 50.24           O
ATOM    683  N   ARG A  88      14.613  -9.539  39.529  1.00135.23           N
ATOM    684  CA  ARG A  88      15.806  -8.829  39.911  1.00135.23           C
ATOM    685  CB  ARG A  88      16.510  -8.145  38.724  1.00135.23           C
ATOM    686  CG  ARG A  88      17.685  -7.245  39.124  1.00135.23           C
ATOM    687  CD  ARG A  88      18.438  -6.642  37.932  1.00135.23           C
ATOM    688  NE  ARG A  88      19.216  -5.463  38.414  1.00135.23           N
ATOM    689  CZ  ARG A  88      20.481  -5.600  38.902  1.00135.23           C
ATOM    690  NH1 ARG A  88      21.059  -6.832  38.954  1.00135.23           N
ATOM    691  NH2 ARG A  88      21.173  -4.507  39.336  1.00135.23           N
ATOM    692  C   ARG A  88      15.423  -7.750  40.886  1.00135.23           C
ATOM    693  O   ARG A  88      14.521  -6.955  40.627  1.00135.23           O
ATOM    694  N   PHE A  89      16.123  -7.700  42.040  1.00161.92           N
ATOM    695  CA  PHE A  89      15.882  -6.697  43.037  1.00161.92           C
ATOM    696  CB  PHE A  89      15.634  -7.267  44.447  1.00161.92           C
ATOM    697  CG  PHE A  89      14.477  -8.210  44.361  1.00161.92           C
ATOM    698  CD1 PHE A  89      13.182  -7.746  44.306  1.00161.92           C
ATOM    699  CD2 PHE A  89      14.694  -9.570  44.314  1.00161.92           C
ATOM    700  CE1 PHE A  89      12.127  -8.625  44.220  1.00161.92           C
ATOM    701  CE2 PHE A  89      13.641 -10.452  44.230  1.00161.92           C
ATOM    702  CZ  PHE A  89      12.353  -9.980  44.186  1.00161.92           C
ATOM    703  C   PHE A  89      17.142  -5.885  43.071  1.00161.92           C
ATOM    704  O   PHE A  89      18.211  -6.397  42.741  1.00161.92           O
ATOM    705  N   SER A  90      17.056  -4.599  43.473  1.00117.98           N
ATOM    706  CA  SER A  90      18.207  -3.762  43.293  1.00117.98           C
ATOM    707  CB  SER A  90      18.236  -3.311  41.819  1.00117.98           C
ATOM    708  OG  SER A  90      19.243  -2.351  41.566  1.00117.98           O
ATOM    709  C   SER A  90      18.097  -2.537  44.159  1.00117.98           C
ATOM    710  O   SER A  90      17.053  -2.282  44.754  1.00117.98           O
ATOM    711  N   THR A  91      19.221  -1.790  44.297  1.00 88.84           N
ATOM    712  CA  THR A  91      19.254  -0.487  44.915  1.00 88.84           C
ATOM    713  CB  THR A  91      20.500  -0.222  45.713  1.00 88.84           C
ATOM    714  OG1 THR A  91      21.647  -0.317  44.881  1.00 88.84           O
ATOM    715  CG2 THR A  91      20.586  -1.237  46.866  1.00 88.84           C
ATOM    716  C   THR A  91      19.228   0.467  43.746  1.00 88.84           C
ATOM    717  O   THR A  91      19.098   0.003  42.614  1.00 88.84           O
ATOM    718  N   VAL A  92      19.128   1.802  43.970  1.00119.26           N
ATOM    719  CA  VAL A  92      19.158   2.736  42.864  1.00119.26           C
ATOM    720  CB  VAL A  92      18.163   3.847  43.021  1.00119.26           C
ATOM    721  CG1 VAL A  92      18.330   4.810  41.832  1.00119.26           C
ATOM    722  CG2 VAL A  92      16.753   3.243  43.137  1.00119.26           C
ATOM    723  C   VAL A  92      20.444   3.432  42.477  1.00119.26           C
ATOM    724  O   VAL A  92      20.962   3.278  41.372  1.00119.26           O
ATOM    725  N   ILE A  93      20.957   4.259  43.417  1.00142.15           N
ATOM    726  CA  ILE A  93      21.958   5.260  43.121  1.00142.15           C
ATOM    727  CB  ILE A  93      22.062   6.298  44.201  1.00142.15           C
ATOM    728  CG1 ILE A  93      20.717   7.024  44.365  1.00142.15           C
ATOM    729  CG2 ILE A  93      23.211   7.253  43.829  1.00142.15           C
ATOM    730  CD1 ILE A  93      20.271   7.749  43.096  1.00142.15           C
ATOM    731  C   ILE A  93      23.347   4.756  42.879  1.00142.15           C
ATOM    732  O   ILE A  93      23.970   5.100  41.875  1.00142.15           O
ATOM    733  N   HIS A  94      23.859   3.921  43.799  1.00 89.28           N
ATOM    734  CA  HIS A  94      25.235   3.510  43.780  1.00 89.28           C
ATOM    735  ND1 HIS A  94      24.735   4.664  46.858  1.00 89.28           N
ATOM    736  CG  HIS A  94      25.810   4.221  46.121  1.00 89.28           C
ATOM    737  CB  HIS A  94      25.753   3.070  45.161  1.00 89.28           C
ATOM    738  NE2 HIS A  94      26.436   6.008  47.349  1.00 89.28           N
ATOM    739  CD2 HIS A  94      26.842   5.052  46.435  1.00 89.28           C
ATOM    740  CE1 HIS A  94      25.164   5.734  47.573  1.00 89.28           C
ATOM    741  C   HIS A  94      25.473   2.403  42.798  1.00 89.28           C
ATOM    742  O   HIS A  94      24.548   1.803  42.261  1.00 89.28           O
ATOM    743  N   GLU A  95      26.766   2.123  42.545  1.00138.24           N
ATOM    744  CA  GLU A  95      27.231   1.215  41.532  1.00138.24           C
ATOM    745  CB  GLU A  95      28.573   1.677  40.932  1.00138.24           C
ATOM    746  CG  GLU A  95      29.566   2.206  41.972  1.00138.24           C
ATOM    747  CD  GLU A  95      29.155   3.622  42.368  1.00138.24           C
ATOM    748  OE1 GLU A  95      28.454   4.284  41.556  1.00138.24           O
ATOM    749  OE2 GLU A  95      29.537   4.060  43.486  1.00138.24           O
ATOM    750  C   GLU A  95      27.325  -0.210  41.994  1.00138.24           C
ATOM    751  O   GLU A  95      26.884  -0.569  43.085  1.00138.24           O
ATOM    752  N   ARG A  96      27.855  -1.075  41.097  1.00191.33           N
ATOM    753  CA  ARG A  96      28.002  -2.483  41.340  1.00191.33           C
ATOM    754  CB  ARG A  96      28.684  -3.224  40.174  1.00191.33           C
ATOM    755  CG  ARG A  96      27.886  -3.194  38.869  1.00191.33           C
ATOM    756  CD  ARG A  96      28.594  -3.878  37.694  1.00191.33           C
ATOM    757  NE  ARG A  96      28.823  -5.301  38.074  1.00191.33           N
ATOM    758  CZ  ARG A  96      28.909  -6.271  37.116  1.00191.33           C
ATOM    759  NH1 ARG A  96      28.778  -5.949  35.796  1.00191.33           N
ATOM    760  NH2 ARG A  96      29.121  -7.568  37.484  1.00191.33           N
ATOM    761  C   ARG A  96      28.907  -2.643  42.521  1.00191.33           C
ATOM    762  O   ARG A  96      29.951  -2.016  42.580  1.00191.33           O
ATOM    763  N   GLY A  97      28.553  -3.479  43.510  1.00 29.72           N
ATOM    764  CA  GLY A  97      29.455  -3.679  44.610  1.00 29.72           C
ATOM    765  C   GLY A  97      29.255  -2.625  45.658  1.00 29.72           C
ATOM    766  O   GLY A  97      30.017  -2.554  46.622  1.00 29.72           O
ATOM    767  N   SER A  98      28.240  -1.759  45.491  1.00 95.96           N
ATOM    768  CA  SER A  98      27.950  -0.783  46.503  1.00 95.96           C
ATOM    769  CB  SER A  98      27.019   0.355  46.043  1.00 95.96           C
ATOM    770  OG  SER A  98      25.706  -0.132  45.806  1.00 95.96           O
ATOM    771  C   SER A  98      27.253  -1.511  47.617  1.00 95.96           C
ATOM    772  O   SER A  98      26.660  -2.567  47.397  1.00 95.96           O
ATOM    773  N   PRO A  99      27.291  -0.982  48.814  1.00 94.54           N
ATOM    774  CA  PRO A  99      26.650  -1.665  49.906  1.00 94.54           C
ATOM    775  CD  PRO A  99      28.436  -0.207  49.264  1.00 94.54           C
ATOM    776  CB  PRO A  99      27.118  -0.961  51.173  1.00 94.54           C
ATOM    777  CG  PRO A  99      28.511  -0.431  50.787  1.00 94.54           C
ATOM    778  C   PRO A  99      25.159  -1.709  49.747  1.00 94.54           C
ATOM    779  O   PRO A  99      24.579  -0.806  49.152  1.00 94.54           O
ATOM    780  N   GLU A 100      24.548  -2.802  50.234  1.00157.99           N
ATOM    781  CA  GLU A 100      23.147  -3.133  50.258  1.00157.99           C
ATOM    782  CB  GLU A 100      22.937  -4.617  50.594  1.00157.99           C
ATOM    783  CG  GLU A 100      23.506  -5.584  49.555  1.00157.99           C
ATOM    784  CD  GLU A 100      22.437  -5.785  48.500  1.00157.99           C
ATOM    785  OE1 GLU A 100      21.555  -4.894  48.405  1.00157.99           O
ATOM    786  OE2 GLU A 100      22.479  -6.821  47.784  1.00157.99           O
ATOM    787  C   GLU A 100      22.431  -2.353  51.336  1.00157.99           C
ATOM    788  O   GLU A 100      21.213  -2.425  51.469  1.00157.99           O
ATOM    789  N   THR A 101      23.205  -1.753  52.246  1.00188.71           N
ATOM    790  CA  THR A 101      22.810  -1.030  53.427  1.00188.71           C
ATOM    791  CB  THR A 101      23.914  -1.062  54.439  1.00188.71           C
ATOM    792  OG1 THR A 101      23.551  -0.330  55.592  1.00188.71           O
ATOM    793  CG2 THR A 101      25.205  -0.523  53.821  1.00188.71           C
ATOM    794  C   THR A 101      22.343   0.390  53.205  1.00188.71           C
ATOM    795  O   THR A 101      21.895   1.027  54.156  1.00188.71           O
ATOM    796  N   LEU A 102      22.533   0.969  52.004  1.00124.18           N
ATOM    797  CA  LEU A 102      22.215   2.352  51.722  1.00124.18           C
ATOM    798  CB  LEU A 102      22.739   2.808  50.343  1.00124.18           C
ATOM    799  CG  LEU A 102      24.269   2.834  50.154  1.00124.18           C
ATOM    800  CD1 LEU A 102      24.908   4.043  50.847  1.00124.18           C
ATOM    801  CD2 LEU A 102      24.913   1.509  50.580  1.00124.18           C
ATOM    802  C   LEU A 102      20.737   2.596  51.637  1.00124.18           C
ATOM    803  O   LEU A 102      19.958   1.717  51.271  1.00124.18           O
ATOM    804  N   ARG A 103      20.332   3.844  51.973  1.00134.83           N
ATOM    805  CA  ARG A 103      18.970   4.285  51.867  1.00134.83           C
ATOM    806  CB  ARG A 103      18.710   5.552  52.716  1.00134.83           C
ATOM    807  CG  ARG A 103      17.237   5.891  52.964  1.00134.83           C
ATOM    808  CD  ARG A 103      17.015   6.788  54.192  1.00134.83           C
ATOM    809  NE  ARG A 103      17.749   8.069  53.993  1.00134.83           N
ATOM    810  CZ  ARG A 103      18.116   8.815  55.077  1.00134.83           C
ATOM    811  NH1 ARG A 103      17.852   8.362  56.338  1.00134.83           N
ATOM    812  NH2 ARG A 103      18.742  10.015  54.900  1.00134.83           N
ATOM    813  C   ARG A 103      18.722   4.571  50.412  1.00134.83           C
ATOM    814  O   ARG A 103      19.447   5.343  49.785  1.00134.83           O
ATOM    815  N   ASP A 104      17.687   3.917  49.840  1.00114.14           N
ATOM    816  CA  ASP A 104      17.338   4.024  48.449  1.00114.14           C
ATOM    817  CB  ASP A 104      18.221   3.188  47.495  1.00114.14           C
ATOM    818  CG  ASP A 104      19.516   3.888  47.122  1.00114.14           C
ATOM    819  OD1 ASP A 104      19.583   5.137  47.257  1.00114.14           O
ATOM    820  OD2 ASP A 104      20.451   3.178  46.663  1.00114.14           O
ATOM    821  C   ASP A 104      16.017   3.354  48.292  1.00114.14           C
ATOM    822  O   ASP A 104      15.613   2.551  49.130  1.00114.14           O
ATOM    823  N   PRO A 105      15.338   3.645  47.219  1.00 92.92           N
ATOM    824  CA  PRO A 105      14.166   2.891  46.900  1.00 92.92           C
ATOM    825  CD  PRO A 105      15.359   4.954  46.588  1.00 92.92           C
ATOM    826  CB  PRO A 105      13.541   3.601  45.702  1.00 92.92           C
ATOM    827  CG  PRO A 105      14.018   5.059  45.840  1.00 92.92           C
ATOM    828  C   PRO A 105      14.753   1.559  46.539  1.00 92.92           C
ATOM    829  O   PRO A 105      15.953   1.508  46.270  1.00 92.92           O
ATOM    830  N   ARG A 106      13.971   0.467  46.573  1.00106.87           N
ATOM    831  CA  ARG A 106      14.523  -0.801  46.182  1.00106.87           C
ATOM    832  CB  ARG A 106      14.327  -1.911  47.229  1.00106.87           C
ATOM    833  CG  ARG A 106      15.148  -1.729  48.504  1.00106.87           C
ATOM    834  CD  ARG A 106      16.658  -1.781  48.276  1.00106.87           C
ATOM    835  NE  ARG A 106      17.312  -1.848  49.613  1.00106.87           N
ATOM    836  CZ  ARG A 106      17.847  -0.729  50.179  1.00106.87           C
ATOM    837  NH1 ARG A 106      17.838   0.453  49.496  1.00106.87           N
ATOM    838  NH2 ARG A 106      18.399  -0.794  51.425  1.00106.87           N
ATOM    839  C   ARG A 106      13.785  -1.254  44.956  1.00106.87           C
ATOM    840  O   ARG A 106      12.557  -1.326  44.958  1.00106.87           O
ATOM    841  N   GLY A 107      14.527  -1.585  43.876  1.00 38.78           N
ATOM    842  CA  GLY A 107      13.935  -2.015  42.634  1.00 38.78           C
ATOM    843  C   GLY A 107      13.352  -3.389  42.791  1.00 38.78           C
ATOM    844  O   GLY A 107      13.908  -4.241  43.485  1.00 38.78           O
ATOM    845  N   PHE A 108      12.197  -3.623  42.122  1.00167.13           N
ATOM    846  CA  PHE A 108      11.493  -4.880  42.139  1.00167.13           C
ATOM    847  CB  PHE A 108      10.181  -4.770  42.941  1.00167.13           C
ATOM    848  CG  PHE A 108       9.570  -6.111  43.189  1.00167.13           C
ATOM    849  CD1 PHE A 108       9.050  -6.857  42.159  1.00167.13           C
ATOM    850  CD2 PHE A 108       9.471  -6.602  44.472  1.00167.13           C
ATOM    851  CE1 PHE A 108       8.479  -8.086  42.401  1.00167.13           C
ATOM    852  CE2 PHE A 108       8.900  -7.829  44.721  1.00167.13           C
ATOM    853  CZ  PHE A 108       8.398  -8.575  43.683  1.00167.13           C
ATOM    854  C   PHE A 108      11.108  -5.178  40.707  1.00167.13           C
ATOM    855  O   PHE A 108      10.102  -4.664  40.216  1.00167.13           O
ATOM    856  N   ALA A 109      11.863  -6.055  40.005  1.00 50.58           N
ATOM    857  CA  ALA A 109      11.574  -6.302  38.610  1.00 50.58           C
ATOM    858  CB  ALA A 109      12.747  -5.956  37.673  1.00 50.58           C
ATOM    859  C   ALA A 109      11.267  -7.761  38.387  1.00 50.58           C
ATOM    860  O   ALA A 109      11.952  -8.640  38.913  1.00 50.58           O
ATOM    861  N   VAL A 110      10.208  -8.053  37.590  1.00 60.08           N
ATOM    862  CA  VAL A 110       9.858  -9.419  37.291  1.00 60.08           C
ATOM    863  CB  VAL A 110       8.683  -9.912  38.077  1.00 60.08           C
ATOM    864  CG1 VAL A 110       8.357 -11.343  37.619  1.00 60.08           C
ATOM    865  CG2 VAL A 110       9.024  -9.802  39.571  1.00 60.08           C
ATOM    866  C   VAL A 110       9.507  -9.556  35.839  1.00 60.08           C
ATOM    867  O   VAL A 110       8.627  -8.866  35.325  1.00 60.08           O
ATOM    868  N   LYS A 111      10.179 -10.503  35.153  1.00114.55           N
ATOM    869  CA  LYS A 111       9.936 -10.787  33.765  1.00114.55           C
ATOM    870  CB  LYS A 111      11.227 -11.080  32.980  1.00114.55           C
ATOM    871  CG  LYS A 111      11.015 -11.387  31.497  1.00114.55           C
ATOM    872  CD  LYS A 111      12.324 -11.516  30.715  1.00114.55           C
ATOM    873  CE  LYS A 111      13.112 -10.208  30.613  1.00114.55           C
ATOM    874  NZ  LYS A 111      12.290  -9.185  29.932  1.00114.55           N
ATOM    875  C   LYS A 111       9.107 -12.036  33.718  1.00114.55           C
ATOM    876  O   LYS A 111       9.481 -13.064  34.284  1.00114.55           O
ATOM    877  N   PHE A 112       7.943 -11.971  33.036  1.00 71.98           N
ATOM    878  CA  PHE A 112       7.078 -13.111  32.931  1.00 71.98           C
ATOM    879  CB  PHE A 112       5.597 -12.778  33.216  1.00 71.98           C
ATOM    880  CG  PHE A 112       5.467 -12.295  34.627  1.00 71.98           C
ATOM    881  CD1 PHE A 112       5.766 -10.991  34.952  1.00 71.98           C
ATOM    882  CD2 PHE A 112       5.036 -13.134  35.630  1.00 71.98           C
ATOM    883  CE1 PHE A 112       5.643 -10.535  36.244  1.00 71.98           C
ATOM    884  CE2 PHE A 112       4.910 -12.685  36.925  1.00 71.98           C
ATOM    885  CZ  PHE A 112       5.219 -11.383  37.236  1.00 71.98           C
ATOM    886  C   PHE A 112       7.185 -13.606  31.524  1.00 71.98           C
ATOM    887  O   PHE A 112       6.977 -12.851  30.575  1.00 71.98           O
ATOM    888  N   TYR A 113       7.510 -14.903  31.344  1.00 73.14           N
ATOM    889  CA  TYR A 113       7.643 -15.401  30.005  1.00 73.14           C
ATOM    890  CB  TYR A 113       8.707 -16.496  29.841  1.00 73.14           C
ATOM    891  CG  TYR A 113      10.019 -15.947  30.270  1.00 73.14           C
ATOM    892  CD1 TYR A 113      10.346 -15.938  31.605  1.00 73.14           C
ATOM    893  CD2 TYR A 113      10.919 -15.449  29.356  1.00 73.14           C
ATOM    894  CE1 TYR A 113      11.555 -15.442  32.027  1.00 73.14           C
ATOM    895  CE2 TYR A 113      12.131 -14.950  29.772  1.00 73.14           C
ATOM    896  CZ  TYR A 113      12.450 -14.947  31.109  1.00 73.14           C
ATOM    897  OH  TYR A 113      13.692 -14.437  31.541  1.00 73.14           O
ATOM    898  C   TYR A 113       6.342 -16.059  29.700  1.00 73.14           C
ATOM    899  O   TYR A 113       6.151 -17.240  29.986  1.00 73.14           O
ATOM    900  N   THR A 114       5.422 -15.289  29.088  1.00 68.20           N
ATOM    901  CA  THR A 114       4.089 -15.744  28.812  1.00 68.20           C
ATOM    902  CB  THR A 114       3.076 -14.633  29.001  1.00 68.20           C
ATOM    903  OG1 THR A 114       3.143 -14.177  30.343  1.00 68.20           O
ATOM    904  CG2 THR A 114       1.636 -15.090  28.700  1.00 68.20           C
ATOM    905  C   THR A 114       4.006 -16.301  27.419  1.00 68.20           C
ATOM    906  O   THR A 114       4.902 -16.125  26.595  1.00 68.20           O
ATOM    907  N   ARG A 115       2.905 -17.024  27.136  1.00126.20           N
ATOM    908  CA  ARG A 115       2.652 -17.609  25.856  1.00126.20           C
ATOM    909  CB  ARG A 115       1.395 -18.496  25.853  1.00126.20           C
ATOM    910  CG  ARG A 115       1.188 -19.248  24.538  1.00126.20           C
ATOM    911  CD  ARG A 115       0.391 -20.545  24.693  1.00126.20           C
ATOM    912  NE  ARG A 115      -0.819 -20.253  25.510  1.00126.20           N
ATOM    913  CZ  ARG A 115      -1.463 -21.275  26.144  1.00126.20           C
ATOM    914  NH1 ARG A 115      -0.993 -22.551  26.029  1.00126.20           N
ATOM    915  NH2 ARG A 115      -2.573 -21.020  26.897  1.00126.20           N
ATOM    916  C   ARG A 115       2.496 -16.510  24.839  1.00126.20           C
ATOM    917  O   ARG A 115       2.833 -16.691  23.673  1.00126.20           O
ATOM    918  N   GLU A 116       1.906 -15.372  25.249  1.00145.15           N
ATOM    919  CA  GLU A 116       1.664 -14.188  24.462  1.00145.15           C
ATOM    920  CB  GLU A 116       0.472 -13.335  24.931  1.00145.15           C
ATOM    921  CG  GLU A 116      -0.849 -14.091  24.831  1.00145.15           C
ATOM    922  CD  GLU A 116      -1.911 -13.113  24.359  1.00145.15           C
ATOM    923  OE1 GLU A 116      -2.412 -12.286  25.167  1.00145.15           O
ATOM    924  OE2 GLU A 116      -2.221 -13.188  23.142  1.00145.15           O
ATOM    925  C   GLU A 116       2.849 -13.278  24.345  1.00145.15           C
ATOM    926  O   GLU A 116       2.700 -12.193  23.788  1.00145.15           O
ATOM    927  N   GLY A 117       3.984 -13.571  25.010  1.00 51.65           N
ATOM    928  CA  GLY A 117       5.127 -12.701  24.915  1.00 51.65           C
ATOM    929  C   GLY A 117       5.593 -12.395  26.312  1.00 51.65           C
ATOM    930  O   GLY A 117       5.031 -12.884  27.292  1.00 51.65           O
ATOM    931  N   ASN A 118       6.661 -11.578  26.432  1.00 56.95           N
ATOM    932  CA  ASN A 118       7.174 -11.230  27.727  1.00 56.95           C
ATOM    933  CB  ASN A 118       8.670 -10.873  27.726  1.00 56.95           C
ATOM    934  CG  ASN A 118       9.468 -12.129  27.423  1.00 56.95           C
ATOM    935  OD1 ASN A 118       9.014 -13.243  27.675  1.00 56.95           O
ATOM    936  ND2 ASN A 118      10.697 -11.946  26.872  1.00 56.95           N
ATOM    937  C   ASN A 118       6.462 -10.024  28.258  1.00 56.95           C
ATOM    938  O   ASN A 118       6.176  -9.080  27.522  1.00 56.95           O
ATOM    939  N   PHE A 119       6.156 -10.049  29.574  1.00 67.56           N
ATOM    940  CA  PHE A 119       5.579  -8.934  30.275  1.00 67.56           C
ATOM    941  CB  PHE A 119       4.252  -9.277  30.974  1.00 67.56           C
ATOM    942  CG  PHE A 119       3.706  -8.029  31.583  1.00 67.56           C
ATOM    943  CD1 PHE A 119       2.925  -7.186  30.829  1.00 67.56           C
ATOM    944  CD2 PHE A 119       3.970  -7.698  32.893  1.00 67.56           C
ATOM    945  CE1 PHE A 119       2.411  -6.032  31.367  1.00 67.56           C
ATOM    946  CE2 PHE A 119       3.457  -6.542  33.438  1.00 67.56           C
ATOM    947  CZ  PHE A 119       2.677  -5.707  32.674  1.00 67.56           C
ATOM    948  C   PHE A 119       6.542  -8.592  31.372  1.00 67.56           C
ATOM    949  O   PHE A 119       6.890  -9.436  32.197  1.00 67.56           O
ATOM    950  N   ASP A 120       7.003  -7.330  31.416  1.00 66.92           N
ATOM    951  CA  ASP A 120       7.936  -6.966  32.440  1.00 66.92           C
ATOM    952  CB  ASP A 120       9.132  -6.142  31.935  1.00 66.92           C
ATOM    953  CG  ASP A 120      10.038  -7.055  31.129  1.00 66.92           C
ATOM    954  OD1 ASP A 120       9.914  -8.299  31.285  1.00 66.92           O
ATOM    955  OD2 ASP A 120      10.865  -6.522  30.342  1.00 66.92           O
ATOM    956  C   ASP A 120       7.250  -6.114  33.451  1.00 66.92           C
ATOM    957  O   ASP A 120       6.625  -5.110  33.112  1.00 66.92           O
ATOM    958  N   LEU A 121       7.323  -6.535  34.728  1.00112.70           N
ATOM    959  CA  LEU A 121       6.873  -5.697  35.797  1.00112.70           C
ATOM    960  CB  LEU A 121       6.181  -6.457  36.950  1.00112.70           C
ATOM    961  CG  LEU A 121       5.710  -5.560  38.118  1.00112.70           C
ATOM    962  CD1 LEU A 121       6.881  -5.092  38.996  1.00112.70           C
ATOM    963  CD2 LEU A 121       4.858  -4.388  37.607  1.00112.70           C
ATOM    964  C   LEU A 121       8.125  -5.074  36.326  1.00112.70           C
ATOM    965  O   LEU A 121       9.056  -5.777  36.709  1.00112.70           O
ATOM    966  N   VAL A 122       8.206  -3.730  36.308  1.00 71.92           N
ATOM    967  CA  VAL A 122       9.375  -3.069  36.813  1.00 71.92           C
ATOM    968  CB  VAL A 122      10.185  -2.420  35.730  1.00 71.92           C
ATOM    969  CG1 VAL A 122      11.408  -1.719  36.346  1.00 71.92           C
ATOM    970  CG2 VAL A 122      10.545  -3.503  34.693  1.00 71.92           C
ATOM    971  C   VAL A 122       8.888  -2.014  37.752  1.00 71.92           C
ATOM    972  O   VAL A 122       8.392  -0.974  37.324  1.00 71.92           O
ATOM    973  N   GLY A 123       9.059  -2.245  39.067  1.00 58.99           N
ATOM    974  CA  GLY A 123       8.548  -1.345  40.068  1.00 58.99           C
ATOM    975  C   GLY A 123       9.574  -1.182  41.152  1.00 58.99           C
ATOM    976  O   GLY A 123      10.697  -1.668  41.033  1.00 58.99           O
ATOM    977  N   ASN A 124       9.205  -0.445  42.225  1.00 58.46           N
ATOM    978  CA  ASN A 124      10.032  -0.224  43.383  1.00 58.46           C
ATOM    979  CB  ASN A 124      10.427   1.249  43.614  1.00 58.46           C
ATOM    980  CG  ASN A 124      11.454   1.690  42.575  1.00 58.46           C
ATOM    981  OD1 ASN A 124      12.337   0.928  42.184  1.00 58.46           O
ATOM    982  ND2 ASN A 124      11.346   2.970  42.129  1.00 58.46           N
ATOM    983  C   ASN A 124       9.215  -0.636  44.578  1.00 58.46           C
ATOM    984  O   ASN A 124       8.012  -0.866  44.460  1.00 58.46           O
ATOM    985  N   ASN A 125       9.853  -0.789  45.761  1.00 53.73           N
ATOM    986  CA  ASN A 125       9.103  -1.158  46.933  1.00 53.73           C
ATOM    987  CB  ASN A 125       9.971  -1.540  48.153  1.00 53.73           C
ATOM    988  CG  ASN A 125      10.780  -0.349  48.645  1.00 53.73           C
ATOM    989  OD1 ASN A 125      11.136   0.545  47.880  1.00 53.73           O
ATOM    990  ND2 ASN A 125      11.097  -0.350  49.969  1.00 53.73           N
ATOM    991  C   ASN A 125       8.186  -0.031  47.312  1.00 53.73           C
ATOM    992  O   ASN A 125       7.024  -0.265  47.644  1.00 53.73           O
ATOM    993  N   PHE A 126       8.682   1.225  47.245  1.00123.44           N
ATOM    994  CA  PHE A 126       7.918   2.390  47.621  1.00123.44           C
ATOM    995  CB  PHE A 126       8.734   3.693  47.711  1.00123.44           C
ATOM    996  CG  PHE A 126       9.679   3.651  48.861  1.00123.44           C
ATOM    997  CD1 PHE A 126       9.287   4.107  50.099  1.00123.44           C
ATOM    998  CD2 PHE A 126      10.956   3.164  48.701  1.00123.44           C
ATOM    999  CE1 PHE A 126      10.157   4.076  51.164  1.00123.44           C
ATOM   1000  CE2 PHE A 126      11.830   3.131  49.762  1.00123.44           C
ATOM   1001  CZ  PHE A 126      11.430   3.587  50.995  1.00123.44           C
ATOM   1002  C   PHE A 126       6.876   2.649  46.572  1.00123.44           C
ATOM   1003  O   PHE A 126       7.143   2.568  45.376  1.00123.44           O
ATOM   1004  N   PRO A 127       5.691   2.987  47.020  1.00103.15           N
ATOM   1005  CA  PRO A 127       4.538   3.203  46.173  1.00103.15           C
ATOM   1006  CD  PRO A 127       5.321   2.769  48.407  1.00103.15           C
ATOM   1007  CB  PRO A 127       3.321   3.099  47.095  1.00103.15           C
ATOM   1008  CG  PRO A 127       3.886   3.305  48.510  1.00103.15           C
ATOM   1009  C   PRO A 127       4.520   4.465  45.350  1.00103.15           C
ATOM   1010  O   PRO A 127       3.641   4.582  44.494  1.00103.15           O
ATOM   1011  N   VAL A 128       5.440   5.423  45.587  1.00140.93           N
ATOM   1012  CA  VAL A 128       5.349   6.697  44.923  1.00140.93           C
ATOM   1013  CB  VAL A 128       5.028   7.770  45.931  1.00140.93           C
ATOM   1014  CG1 VAL A 128       4.763   9.110  45.243  1.00140.93           C
ATOM   1015  CG2 VAL A 128       3.893   7.286  46.833  1.00140.93           C
ATOM   1016  C   VAL A 128       6.710   7.033  44.380  1.00140.93           C
ATOM   1017  O   VAL A 128       7.671   6.305  44.624  1.00140.93           O
ATOM   1018  N   PHE A 129       6.816   8.135  43.596  1.00128.97           N
ATOM   1019  CA  PHE A 129       8.091   8.550  43.088  1.00128.97           C
ATOM   1020  CB  PHE A 129       8.258   8.303  41.579  1.00128.97           C
ATOM   1021  CG  PHE A 129       9.718   8.094  41.360  1.00128.97           C
ATOM   1022  CD1 PHE A 129      10.248   6.842  41.576  1.00128.97           C
ATOM   1023  CD2 PHE A 129      10.559   9.110  40.974  1.00128.97           C
ATOM   1024  CE1 PHE A 129      11.587   6.597  41.393  1.00128.97           C
ATOM   1025  CE2 PHE A 129      11.902   8.871  40.788  1.00128.97           C
ATOM   1026  CZ  PHE A 129      12.420   7.615  40.999  1.00128.97           C
ATOM   1027  C   PHE A 129       8.269  10.022  43.382  1.00128.97           C
ATOM   1028  O   PHE A 129       7.329  10.721  43.761  1.00128.97           O
ATOM   1029  N   PHE A 130       9.524  10.512  43.250  1.00 86.48           N
ATOM   1030  CA  PHE A 130       9.940  11.862  43.530  1.00 86.48           C
ATOM   1031  CB  PHE A 130      11.461  12.044  43.390  1.00 86.48           C
ATOM   1032  CG  PHE A 130      12.153  11.094  44.303  1.00 86.48           C
ATOM   1033  CD1 PHE A 130      12.407   9.806  43.887  1.00 86.48           C
ATOM   1034  CD2 PHE A 130      12.556  11.487  45.558  1.00 86.48           C
ATOM   1035  CE1 PHE A 130      13.048   8.914  44.714  1.00 86.48           C
ATOM   1036  CE2 PHE A 130      13.198  10.597  46.389  1.00 86.48           C
ATOM   1037  CZ  PHE A 130      13.448   9.312  45.966  1.00 86.48           C
ATOM   1038  C   PHE A 130       9.341  12.822  42.545  1.00 86.48           C
ATOM   1039  O   PHE A 130       8.986  13.943  42.912  1.00 86.48           O
ATOM   1040  N   ILE A 131       9.272  12.421  41.257  1.00166.93           N
ATOM   1041  CA  ILE A 131       8.829  13.306  40.205  1.00166.93           C
ATOM   1042  CB  ILE A 131       9.908  13.815  39.276  1.00166.93           C
ATOM   1043  CG1 ILE A 131      10.522  12.690  38.424  1.00166.93           C
ATOM   1044  CG2 ILE A 131      10.945  14.579  40.119  1.00166.93           C
ATOM   1045  CD1 ILE A 131      11.342  11.677  39.203  1.00166.93           C
ATOM   1046  C   ILE A 131       7.814  12.607  39.348  1.00166.93           C
ATOM   1047  O   ILE A 131       7.641  11.392  39.427  1.00166.93           O
ATOM   1048  N   ARG A 132       6.987  13.431  38.667  1.00232.67           N
ATOM   1049  CA  ARG A 132       5.911  13.095  37.768  1.00232.67           C
ATOM   1050  CB  ARG A 132       4.688  14.016  37.988  1.00232.67           C
ATOM   1051  CG  ARG A 132       4.976  15.516  37.861  1.00232.67           C
ATOM   1052  CD  ARG A 132       3.807  16.427  38.267  1.00232.67           C
ATOM   1053  NE  ARG A 132       3.460  16.143  39.689  1.00232.67           N
ATOM   1054  CZ  ARG A 132       3.284  17.160  40.586  1.00232.67           C
ATOM   1055  NH1 ARG A 132       3.517  18.454  40.223  1.00232.67           N
ATOM   1056  NH2 ARG A 132       2.871  16.874  41.855  1.00232.67           N
ATOM   1057  C   ARG A 132       6.209  13.001  36.293  1.00232.67           C
ATOM   1058  O   ARG A 132       5.360  12.518  35.546  1.00232.67           O
ATOM   1059  N   ASP A 133       7.324  13.580  35.802  1.00 92.00           N
ATOM   1060  CA  ASP A 133       7.559  13.634  34.376  1.00 92.00           C
ATOM   1061  CB  ASP A 133       7.432  15.077  33.852  1.00 92.00           C
ATOM   1062  CG  ASP A 133       7.275  15.093  32.340  1.00 92.00           C
ATOM   1063  OD1 ASP A 133       8.090  14.437  31.637  1.00 92.00           O
ATOM   1064  OD2 ASP A 133       6.321  15.767  31.868  1.00 92.00           O
ATOM   1065  C   ASP A 133       8.958  13.143  34.102  1.00 92.00           C
ATOM   1066  O   ASP A 133       9.892  13.437  34.846  1.00 92.00           O
ATOM   1067  N   GLY A 134       9.135  12.403  32.986  1.00 47.98           N
ATOM   1068  CA  GLY A 134      10.384  11.803  32.585  1.00 47.98           C
ATOM   1069  C   GLY A 134      11.420  12.859  32.330  1.00 47.98           C
ATOM   1070  O   GLY A 134      12.618  12.603  32.452  1.00 47.98           O
ATOM   1071  N   MET A 135      10.991  14.078  31.953  1.00 93.73           N
ATOM   1072  CA  MET A 135      11.920  15.116  31.594  1.00 93.73           C
ATOM   1073  CB  MET A 135      11.267  16.441  31.168  1.00 93.73           C
ATOM   1074  CG  MET A 135      12.295  17.567  30.985  1.00 93.73           C
ATOM   1075  SD  MET A 135      13.486  17.340  29.625  1.00 93.73           S
ATOM   1076  CE  MET A 135      12.324  17.778  28.303  1.00 93.73           C
ATOM   1077  C   MET A 135      12.861  15.399  32.732  1.00 93.73           C
ATOM   1078  O   MET A 135      13.994  15.807  32.495  1.00 93.73           O
ATOM   1079  N   LYS A 136      12.399  15.282  33.990  1.00217.63           N
ATOM   1080  CA  LYS A 136      13.196  15.550  35.164  1.00217.63           C
ATOM   1081  CB  LYS A 136      12.386  16.030  36.372  1.00217.63           C
ATOM   1082  CG  LYS A 136      11.574  17.265  35.987  1.00217.63           C
ATOM   1083  CD  LYS A 136      12.354  18.239  35.094  1.00217.63           C
ATOM   1084  CE  LYS A 136      13.809  18.471  35.501  1.00217.63           C
ATOM   1085  NZ  LYS A 136      14.011  19.891  35.862  1.00217.63           N
ATOM   1086  C   LYS A 136      14.123  14.446  35.609  1.00217.63           C
ATOM   1087  O   LYS A 136      14.977  14.677  36.462  1.00217.63           O
ATOM   1088  N   PHE A 137      13.957  13.210  35.108  1.00 85.89           N
ATOM   1089  CA  PHE A 137      14.647  12.063  35.642  1.00 85.89           C
ATOM   1090  CB  PHE A 137      14.251  10.757  34.919  1.00 85.89           C
ATOM   1091  CG  PHE A 137      14.836   9.579  35.631  1.00 85.89           C
ATOM   1092  CD1 PHE A 137      14.213   9.046  36.739  1.00 85.89           C
ATOM   1093  CD2 PHE A 137      15.999   8.993  35.183  1.00 85.89           C
ATOM   1094  CE1 PHE A 137      14.744   7.957  37.392  1.00 85.89           C
ATOM   1095  CE2 PHE A 137      16.536   7.905  35.831  1.00 85.89           C
ATOM   1096  CZ  PHE A 137      15.909   7.385  36.938  1.00 85.89           C
ATOM   1097  C   PHE A 137      16.147  12.186  35.601  1.00 85.89           C
ATOM   1098  O   PHE A 137      16.791  11.861  36.598  1.00 85.89           O
ATOM   1099  N   PRO A 138      16.769  12.612  34.532  1.00 87.57           N
ATOM   1100  CA  PRO A 138      18.203  12.717  34.535  1.00 87.57           C
ATOM   1101  CD  PRO A 138      16.223  12.477  33.193  1.00 87.57           C
ATOM   1102  CB  PRO A 138      18.580  13.100  33.106  1.00 87.57           C
ATOM   1103  CG  PRO A 138      17.446  12.487  32.259  1.00 87.57           C
ATOM   1104  C   PRO A 138      18.664  13.674  35.590  1.00 87.57           C
ATOM   1105  O   PRO A 138      19.681  13.409  36.230  1.00 87.57           O
ATOM   1106  N   ASP A 139      17.929  14.784  35.799  1.00 81.90           N
ATOM   1107  CA  ASP A 139      18.308  15.789  36.755  1.00 81.90           C
ATOM   1108  CB  ASP A 139      17.382  17.022  36.732  1.00 81.90           C
ATOM   1109  CG  ASP A 139      17.404  17.626  35.334  1.00 81.90           C
ATOM   1110  OD1 ASP A 139      16.864  16.951  34.423  1.00 81.90           O
ATOM   1111  OD2 ASP A 139      17.941  18.749  35.150  1.00 81.90           O
ATOM   1112  C   ASP A 139      18.239  15.229  38.144  1.00 81.90           C
ATOM   1113  O   ASP A 139      19.143  15.431  38.954  1.00 81.90           O
ATOM   1114  N   MET A 140      17.156  14.494  38.451  1.00 62.58           N
ATOM   1115  CA  MET A 140      16.952  13.971  39.771  1.00 62.58           C
ATOM   1116  CB  MET A 140      15.651  13.156  39.847  1.00 62.58           C
ATOM   1117  CG  MET A 140      15.253  12.732  41.258  1.00 62.58           C
ATOM   1118  SD  MET A 140      13.975  11.446  41.286  1.00 62.58           S
ATOM   1119  CE  MET A 140      15.109  10.157  40.696  1.00 62.58           C
ATOM   1120  C   MET A 140      18.081  13.038  40.092  1.00 62.58           C
ATOM   1121  O   MET A 140      18.695  13.131  41.154  1.00 62.58           O
ATOM   1122  N   VAL A 141      18.403  12.134  39.147  1.00 48.36           N
ATOM   1123  CA  VAL A 141      19.417  11.133  39.321  1.00 48.36           C
ATOM   1124  CB  VAL A 141      19.492  10.211  38.144  1.00 48.36           C
ATOM   1125  CG1 VAL A 141      20.640   9.221  38.366  1.00 48.36           C
ATOM   1126  CG2 VAL A 141      18.122   9.533  37.977  1.00 48.36           C
ATOM   1127  C   VAL A 141      20.756  11.782  39.483  1.00 48.36           C
ATOM   1128  O   VAL A 141      21.534  11.407  40.359  1.00 48.36           O
ATOM   1129  N   HIS A 142      21.051  12.795  38.649  1.00 57.81           N
ATOM   1130  CA  HIS A 142      22.322  13.457  38.704  1.00 57.81           C
ATOM   1131  ND1 HIS A 142      22.452  14.640  35.080  1.00 57.81           N
ATOM   1132  CG  HIS A 142      22.641  13.951  36.257  1.00 57.81           C
ATOM   1133  CB  HIS A 142      22.473  14.541  37.625  1.00 57.81           C
ATOM   1134  NE2 HIS A 142      23.069  12.579  34.516  1.00 57.81           N
ATOM   1135  CD2 HIS A 142      23.017  12.693  35.894  1.00 57.81           C
ATOM   1136  CE1 HIS A 142      22.722  13.773  34.072  1.00 57.81           C
ATOM   1137  C   HIS A 142      22.481  14.082  40.057  1.00 57.81           C
ATOM   1138  O   HIS A 142      23.577  14.095  40.613  1.00 57.81           O
ATOM   1139  N   ALA A 143      21.388  14.639  40.606  1.00 46.93           N
ATOM   1140  CA  ALA A 143      21.404  15.268  41.902  1.00 46.93           C
ATOM   1141  CB  ALA A 143      20.058  15.929  42.245  1.00 46.93           C
ATOM   1142  C   ALA A 143      21.693  14.265  42.984  1.00 46.93           C
ATOM   1143  O   ALA A 143      22.364  14.578  43.969  1.00 46.93           O
ATOM   1144  N   LEU A 144      21.104  13.059  42.862  1.00 80.39           N
ATOM   1145  CA  LEU A 144      21.218  11.975  43.804  1.00 80.39           C
ATOM   1146  CB  LEU A 144      20.192  10.862  43.518  1.00 80.39           C
ATOM   1147  CG  LEU A 144      18.729  11.341  43.440  1.00 80.39           C
ATOM   1148  CD1 LEU A 144      17.769  10.170  43.185  1.00 80.39           C
ATOM   1149  CD2 LEU A 144      18.334  12.174  44.660  1.00 80.39           C
ATOM   1150  C   LEU A 144      22.570  11.322  43.726  1.00 80.39           C
ATOM   1151  O   LEU A 144      23.133  10.913  44.741  1.00 80.39           O
ATOM   1152  N   LYS A 145      23.121  11.190  42.502  1.00 66.93           N
ATOM   1153  CA  LYS A 145      24.348  10.464  42.303  1.00 66.93           C
ATOM   1154  CB  LYS A 145      24.744  10.294  40.829  1.00 66.93           C
ATOM   1155  CG  LYS A 145      23.868   9.299  40.071  1.00 66.93           C
ATOM   1156  CD  LYS A 145      24.059   9.373  38.557  1.00 66.93           C
ATOM   1157  CE  LYS A 145      23.360   8.247  37.793  1.00 66.93           C
ATOM   1158  NZ  LYS A 145      23.377   8.541  36.342  1.00 66.93           N
ATOM   1159  C   LYS A 145      25.474  11.158  42.992  1.00 66.93           C
ATOM   1160  O   LYS A 145      25.372  12.312  43.405  1.00 66.93           O
ATOM   1161  N   PRO A 146      26.565  10.454  43.132  1.00 79.60           N
ATOM   1162  CA  PRO A 146      27.691  11.038  43.791  1.00 79.60           C
ATOM   1163  CD  PRO A 146      26.544   9.006  43.274  1.00 79.60           C
ATOM   1164  CB  PRO A 146      28.715   9.915  43.922  1.00 79.60           C
ATOM   1165  CG  PRO A 146      27.831   8.656  44.047  1.00 79.60           C
ATOM   1166  C   PRO A 146      28.127  12.261  43.056  1.00 79.60           C
ATOM   1167  O   PRO A 146      27.992  12.317  41.835  1.00 79.60           O
ATOM   1168  N   ASN A 147      28.618  13.267  43.802  1.00 60.43           N
ATOM   1169  CA  ASN A 147      29.075  14.505  43.246  1.00 60.43           C
ATOM   1170  CB  ASN A 147      29.760  15.370  44.319  1.00 60.43           C
ATOM   1171  CG  ASN A 147      30.134  16.731  43.762  1.00 60.43           C
ATOM   1172  OD1 ASN A 147      30.835  16.844  42.757  1.00 60.43           O
ATOM   1173  ND2 ASN A 147      29.661  17.799  44.455  1.00 60.43           N
ATOM   1174  C   ASN A 147      30.082  14.161  42.190  1.00 60.43           C
ATOM   1175  O   ASN A 147      30.968  13.339  42.409  1.00 60.43           O
ATOM   1176  N   PRO A 148      29.950  14.761  41.037  1.00 91.02           N
ATOM   1177  CA  PRO A 148      30.791  14.505  39.893  1.00 91.02           C
ATOM   1178  CD  PRO A 148      28.975  15.816  40.807  1.00 91.02           C
ATOM   1179  CB  PRO A 148      30.198  15.357  38.767  1.00 91.02           C
ATOM   1180  CG  PRO A 148      29.430  16.477  39.497  1.00 91.02           C
ATOM   1181  C   PRO A 148      32.249  14.783  40.134  1.00 91.02           C
ATOM   1182  O   PRO A 148      33.076  14.239  39.399  1.00 91.02           O
ATOM   1183  N   LYS A 149      32.578  15.743  41.022  1.00 82.40           N
ATOM   1184  CA  LYS A 149      33.943  16.021  41.381  1.00 82.40           C
ATOM   1185  CB  LYS A 149      34.067  17.440  41.955  1.00 82.40           C
ATOM   1186  CG  LYS A 149      35.501  17.948  42.066  1.00 82.40           C
ATOM   1187  CD  LYS A 149      35.583  19.447  42.355  1.00 82.40           C
ATOM   1188  CE  LYS A 149      37.013  19.980  42.358  1.00 82.40           C
ATOM   1189  NZ  LYS A 149      37.036  21.365  42.875  1.00 82.40           N
ATOM   1190  C   LYS A 149      34.477  15.064  42.424  1.00 82.40           C
ATOM   1191  O   LYS A 149      35.528  14.448  42.252  1.00 82.40           O
ATOM   1192  N   SER A 150      33.744  14.947  43.556  1.00 65.69           N
ATOM   1193  CA  SER A 150      34.142  14.207  44.731  1.00 65.69           C
ATOM   1194  CB  SER A 150      33.419  14.695  45.999  1.00 65.69           C
ATOM   1195  OG  SER A 150      32.022  14.460  45.892  1.00 65.69           O
ATOM   1196  C   SER A 150      33.901  12.730  44.624  1.00 65.69           C
ATOM   1197  O   SER A 150      34.575  11.940  45.284  1.00 65.69           O
ATOM   1198  N   HIS A 151      32.944  12.317  43.779  1.00101.74           N
ATOM   1199  CA  HIS A 151      32.543  10.944  43.651  1.00101.74           C
ATOM   1200  ND1 HIS A 151      32.800   8.337  41.619  1.00101.74           N
ATOM   1201  CG  HIS A 151      33.277   8.637  42.877  1.00101.74           C
ATOM   1202  CB  HIS A 151      33.717  10.010  43.292  1.00101.74           C
ATOM   1203  NE2 HIS A 151      32.744   6.446  42.790  1.00101.74           N
ATOM   1204  CD2 HIS A 151      33.238   7.470  43.578  1.00101.74           C
ATOM   1205  CE1 HIS A 151      32.496   7.015  41.623  1.00101.74           C
ATOM   1206  C   HIS A 151      31.913  10.468  44.933  1.00101.74           C
ATOM   1207  O   HIS A 151      31.952   9.279  45.251  1.00101.74           O
ATOM   1208  N   ILE A 152      31.286  11.380  45.706  1.00 58.64           N
ATOM   1209  CA  ILE A 152      30.595  10.950  46.891  1.00 58.64           C
ATOM   1210  CB  ILE A 152      31.364  11.167  48.163  1.00 58.64           C
ATOM   1211  CG1 ILE A 152      32.575  10.213  48.173  1.00 58.64           C
ATOM   1212  CG2 ILE A 152      30.416  10.979  49.358  1.00 58.64           C
ATOM   1213  CD1 ILE A 152      33.500  10.374  49.375  1.00 58.64           C
ATOM   1214  C   ILE A 152      29.258  11.633  46.937  1.00 58.64           C
ATOM   1215  O   ILE A 152      29.115  12.784  46.527  1.00 58.64           O
ATOM   1216  N   GLN A 153      28.228  10.915  47.434  1.00 56.91           N
ATOM   1217  CA  GLN A 153      26.883  11.420  47.432  1.00 56.91           C
ATOM   1218  CB  GLN A 153      25.855  10.330  47.782  1.00 56.91           C
ATOM   1219  CG  GLN A 153      24.392  10.768  47.700  1.00 56.91           C
ATOM   1220  CD  GLN A 153      23.564   9.496  47.808  1.00 56.91           C
ATOM   1221  OE1 GLN A 153      24.108   8.393  47.814  1.00 56.91           O
ATOM   1222  NE2 GLN A 153      22.215   9.643  47.882  1.00 56.91           N
ATOM   1223  C   GLN A 153      26.784  12.537  48.424  1.00 56.91           C
ATOM   1224  O   GLN A 153      27.292  12.434  49.538  1.00 56.91           O
ATOM   1225  N   GLU A 154      26.135  13.655  48.031  1.00119.59           N
ATOM   1226  CA  GLU A 154      26.034  14.772  48.927  1.00119.59           C
ATOM   1227  CB  GLU A 154      26.878  15.973  48.466  1.00119.59           C
ATOM   1228  CG  GLU A 154      26.952  17.101  49.492  1.00119.59           C
ATOM   1229  CD  GLU A 154      27.788  16.590  50.655  1.00119.59           C
ATOM   1230  OE1 GLU A 154      28.753  15.822  50.397  1.00119.59           O
ATOM   1231  OE2 GLU A 154      27.465  16.952  51.817  1.00119.59           O
ATOM   1232  C   GLU A 154      24.601  15.218  48.976  1.00119.59           C
ATOM   1233  O   GLU A 154      24.011  15.558  47.953  1.00119.59           O
ATOM   1234  N   ASN A 155      24.011  15.256  50.189  1.00 63.19           N
ATOM   1235  CA  ASN A 155      22.631  15.629  50.356  1.00 63.19           C
ATOM   1236  CB  ASN A 155      22.020  15.244  51.705  1.00 63.19           C
ATOM   1237  CG  ASN A 155      21.852  13.730  51.665  1.00 63.19           C
ATOM   1238  OD1 ASN A 155      21.693  13.144  50.595  1.00 63.19           O
ATOM   1239  ND2 ASN A 155      21.889  13.075  52.856  1.00 63.19           N
ATOM   1240  C   ASN A 155      22.437  17.084  50.060  1.00 63.19           C
ATOM   1241  O   ASN A 155      21.337  17.515  49.723  1.00 63.19           O
ATOM   1242  N   TRP A 156      23.507  17.885  50.183  1.00 95.22           N
ATOM   1243  CA  TRP A 156      23.454  19.273  49.825  1.00 95.22           C
ATOM   1244  CB  TRP A 156      24.878  19.861  49.844  1.00 95.22           C
ATOM   1245  CG  TRP A 156      25.174  20.994  48.886  1.00 95.22           C
ATOM   1246  CD2 TRP A 156      25.146  22.399  49.174  1.00 95.22           C
ATOM   1247  CD1 TRP A 156      25.591  20.878  47.592  1.00 95.22           C
ATOM   1248  NE1 TRP A 156      25.832  22.118  47.059  1.00 95.22           N
ATOM   1249  CE2 TRP A 156      25.564  23.066  48.020  1.00 95.22           C
ATOM   1250  CE3 TRP A 156      24.811  23.081  50.302  1.00 95.22           C
ATOM   1251  CZ2 TRP A 156      25.655  24.426  47.980  1.00 95.22           C
ATOM   1252  CZ3 TRP A 156      24.901  24.453  50.255  1.00 95.22           C
ATOM   1253  CH2 TRP A 156      25.315  25.116  49.120  1.00 95.22           C
ATOM   1254  C   TRP A 156      22.949  19.354  48.414  1.00 95.22           C
ATOM   1255  O   TRP A 156      22.150  20.230  48.084  1.00 95.22           O
ATOM   1256  N   ARG A 157      23.453  18.467  47.535  1.00111.60           N
ATOM   1257  CA  ARG A 157      23.078  18.439  46.144  1.00111.60           C
ATOM   1258  CB  ARG A 157      24.012  17.525  45.340  1.00111.60           C
ATOM   1259  CG  ARG A 157      25.479  17.927  45.500  1.00111.60           C
ATOM   1260  CD  ARG A 157      26.453  17.096  44.669  1.00111.60           C
ATOM   1261  NE  ARG A 157      26.638  17.828  43.389  1.00111.60           N
ATOM   1262  CZ  ARG A 157      25.727  17.670  42.389  1.00111.60           C
ATOM   1263  NH1 ARG A 157      24.700  16.784  42.528  1.00111.60           N
ATOM   1264  NH2 ARG A 157      25.830  18.416  41.255  1.00111.60           N
ATOM   1265  C   ARG A 157      21.654  17.978  45.897  1.00111.60           C
ATOM   1266  O   ARG A 157      20.905  18.636  45.176  1.00111.60           O
ATOM   1267  N   ILE A 158      21.243  16.832  46.485  1.00115.36           N
ATOM   1268  CA  ILE A 158      19.938  16.222  46.312  1.00115.36           C
ATOM   1269  CB  ILE A 158      19.830  14.890  47.003  1.00115.36           C
ATOM   1270  CG1 ILE A 158      18.425  14.285  46.815  1.00115.36           C
ATOM   1271  CG2 ILE A 158      20.239  15.075  48.471  1.00115.36           C
ATOM   1272  CD1 ILE A 158      18.264  12.928  47.500  1.00115.36           C
ATOM   1273  C   ILE A 158      18.830  17.055  46.896  1.00115.36           C
ATOM   1274  O   ILE A 158      17.764  17.191  46.295  1.00115.36           O
ATOM   1275  N   MET A 159      19.033  17.601  48.108  1.00130.74           N
ATOM   1276  CA  MET A 159      18.019  18.386  48.760  1.00130.74           C
ATOM   1277  CB  MET A 159      18.346  18.796  50.209  1.00130.74           C
ATOM   1278  CG  MET A 159      17.973  17.740  51.254  1.00130.74           C
ATOM   1279  SD  MET A 159      18.933  16.200  51.206  1.00130.74           S
ATOM   1280  CE  MET A 159      18.095  15.469  52.645  1.00130.74           C
ATOM   1281  C   MET A 159      17.759  19.623  47.962  1.00130.74           C
ATOM   1282  O   MET A 159      16.655  20.163  47.993  1.00130.74           O
ATOM   1283  N   ASP A 160      18.795  20.133  47.273  1.00 78.30           N
ATOM   1284  CA  ASP A 160      18.659  21.291  46.430  1.00 78.30           C
ATOM   1285  CB  ASP A 160      20.000  21.619  45.731  1.00 78.30           C
ATOM   1286  CG  ASP A 160      19.878  22.846  44.834  1.00 78.30           C
ATOM   1287  OD1 ASP A 160      18.763  23.422  44.746  1.00 78.30           O
ATOM   1288  OD2 ASP A 160      20.912  23.220  44.218  1.00 78.30           O
ATOM   1289  C   ASP A 160      17.631  20.996  45.368  1.00 78.30           C
ATOM   1290  O   ASP A 160      16.652  21.725  45.210  1.00 78.30           O
ATOM   1291  N   PHE A 161      17.800  19.869  44.651  1.00101.66           N
ATOM   1292  CA  PHE A 161      16.933  19.457  43.582  1.00101.66           C
ATOM   1293  CB  PHE A 161      17.454  18.126  43.014  1.00101.66           C
ATOM   1294  CG  PHE A 161      16.610  17.629  41.896  1.00101.66           C
ATOM   1295  CD1 PHE A 161      16.889  18.000  40.604  1.00101.66           C
ATOM   1296  CD2 PHE A 161      15.550  16.787  42.143  1.00101.66           C
ATOM   1297  CE1 PHE A 161      16.124  17.536  39.565  1.00101.66           C
ATOM   1298  CE2 PHE A 161      14.781  16.318  41.106  1.00101.66           C
ATOM   1299  CZ  PHE A 161      15.071  16.693  39.816  1.00101.66           C
ATOM   1300  C   PHE A 161      15.544  19.241  44.108  1.00101.66           C
ATOM   1301  O   PHE A 161      14.568  19.748  43.555  1.00101.66           O
ATOM   1302  N   PHE A 162      15.422  18.493  45.215  1.00121.66           N
ATOM   1303  CA  PHE A 162      14.136  18.124  45.740  1.00121.66           C
ATOM   1304  CB  PHE A 162      14.220  17.042  46.813  1.00121.66           C
ATOM   1305  CG  PHE A 162      14.462  15.851  45.971  1.00121.66           C
ATOM   1306  CD1 PHE A 162      13.416  15.349  45.234  1.00121.66           C
ATOM   1307  CD2 PHE A 162      15.697  15.256  45.899  1.00121.66           C
ATOM   1308  CE1 PHE A 162      13.591  14.253  44.430  1.00121.66           C
ATOM   1309  CE2 PHE A 162      15.877  14.157  45.094  1.00121.66           C
ATOM   1310  CZ  PHE A 162      14.825  13.653  44.366  1.00121.66           C
ATOM   1311  C   PHE A 162      13.319  19.264  46.260  1.00121.66           C
ATOM   1312  O   PHE A 162      12.116  19.321  46.009  1.00121.66           O
ATOM   1313  N   SER A 163      13.932  20.192  47.012  1.00 33.73           N
ATOM   1314  CA  SER A 163      13.186  21.281  47.577  1.00 33.73           C
ATOM   1315  CB  SER A 163      14.058  22.207  48.436  1.00 33.73           C
ATOM   1316  OG  SER A 163      15.022  22.851  47.617  1.00 33.73           O
ATOM   1317  C   SER A 163      12.625  22.109  46.462  1.00 33.73           C
ATOM   1318  O   SER A 163      11.525  22.651  46.577  1.00 33.73           O
ATOM   1319  N   HIS A 164      13.394  22.244  45.364  1.00 99.90           N
ATOM   1320  CA  HIS A 164      12.998  22.995  44.204  1.00 99.90           C
ATOM   1321  ND1 HIS A 164      16.353  24.253  43.978  1.00 99.90           N
ATOM   1322  CG  HIS A 164      15.038  24.400  43.602  1.00 99.90           C
ATOM   1323  CB  HIS A 164      14.131  23.272  43.193  1.00 99.90           C
ATOM   1324  NE2 HIS A 164      15.898  26.425  44.108  1.00 99.90           N
ATOM   1325  CD2 HIS A 164      14.777  25.733  43.687  1.00 99.90           C
ATOM   1326  CE1 HIS A 164      16.820  25.493  44.269  1.00 99.90           C
ATOM   1327  C   HIS A 164      11.894  22.293  43.477  1.00 99.90           C
ATOM   1328  O   HIS A 164      11.124  22.944  42.773  1.00 99.90           O
ATOM   1329  N   HIS A 165      11.844  20.944  43.551  1.00112.76           N
ATOM   1330  CA  HIS A 165      10.779  20.183  42.952  1.00112.76           C
ATOM   1331  ND1 HIS A 165      12.796  18.358  40.298  1.00112.76           N
ATOM   1332  CG  HIS A 165      11.835  19.161  40.863  1.00112.76           C
ATOM   1333  CB  HIS A 165      11.251  18.917  42.218  1.00112.76           C
ATOM   1334  NE2 HIS A 165      12.306  19.916  38.789  1.00112.76           N
ATOM   1335  CD2 HIS A 165      11.546  20.110  39.930  1.00112.76           C
ATOM   1336  CE1 HIS A 165      13.041  18.853  39.059  1.00112.76           C
ATOM   1337  C   HIS A 165       9.925  19.668  44.077  1.00112.76           C
ATOM   1338  O   HIS A 165      10.057  18.516  44.485  1.00112.76           O
ATOM   1339  N   PRO A 166       8.992  20.468  44.518  1.00174.79           N
ATOM   1340  CA  PRO A 166       8.173  20.221  45.681  1.00174.79           C
ATOM   1341  CD  PRO A 166       8.785  21.790  43.953  1.00174.79           C
ATOM   1342  CB  PRO A 166       7.285  21.457  45.829  1.00174.79           C
ATOM   1343  CG  PRO A 166       8.006  22.557  45.032  1.00174.79           C
ATOM   1344  C   PRO A 166       7.327  18.984  45.602  1.00174.79           C
ATOM   1345  O   PRO A 166       6.860  18.529  46.645  1.00174.79           O
ATOM   1346  N   GLU A 167       7.095  18.441  44.395  1.00158.69           N
ATOM   1347  CA  GLU A 167       6.251  17.299  44.174  1.00158.69           C
ATOM   1348  CB  GLU A 167       6.248  16.829  42.710  1.00158.69           C
ATOM   1349  CG  GLU A 167       6.135  17.943  41.673  1.00158.69           C
ATOM   1350  CD  GLU A 167       7.561  18.282  41.269  1.00158.69           C
ATOM   1351  OE1 GLU A 167       8.331  17.322  41.000  1.00158.69           O
ATOM   1352  OE2 GLU A 167       7.902  19.494  41.230  1.00158.69           O
ATOM   1353  C   GLU A 167       6.860  16.144  44.906  1.00158.69           C
ATOM   1354  O   GLU A 167       6.195  15.155  45.205  1.00158.69           O
ATOM   1355  N   SER A 168       8.180  16.224  45.134  1.00 65.63           N
ATOM   1356  CA  SER A 168       8.983  15.200  45.742  1.00 65.63           C
ATOM   1357  CB  SER A 168      10.478  15.554  45.692  1.00 65.63           C
ATOM   1358  OG  SER A 168      10.711  16.751  46.422  1.00 65.63           O
ATOM   1359  C   SER A 168       8.641  14.986  47.191  1.00 65.63           C
ATOM   1360  O   SER A 168       9.113  14.024  47.795  1.00 65.63           O
ATOM   1361  N   LEU A 169       7.808  15.848  47.799  1.00113.56           N
ATOM   1362  CA  LEU A 169       7.607  15.775  49.224  1.00113.56           C
ATOM   1363  CB  LEU A 169       6.669  16.893  49.735  1.00113.56           C
ATOM   1364  CG  LEU A 169       6.639  17.126  51.266  1.00113.56           C
ATOM   1365  CD1 LEU A 169       5.677  18.265  51.620  1.00113.56           C
ATOM   1366  CD2 LEU A 169       6.321  15.861  52.078  1.00113.56           C
ATOM   1367  C   LEU A 169       7.059  14.431  49.627  1.00113.56           C
ATOM   1368  O   LEU A 169       7.554  13.826  50.577  1.00113.56           O
ATOM   1369  N   HIS A 170       6.052  13.901  48.912  1.00 84.20           N
ATOM   1370  CA  HIS A 170       5.440  12.658  49.303  1.00 84.20           C
ATOM   1371  ND1 HIS A 170       2.552  11.217  49.949  1.00 84.20           N
ATOM   1372  CG  HIS A 170       3.526  11.080  48.985  1.00 84.20           C
ATOM   1373  CB  HIS A 170       4.280  12.230  48.393  1.00 84.20           C
ATOM   1374  NE2 HIS A 170       2.744   9.041  49.544  1.00 84.20           N
ATOM   1375  CD2 HIS A 170       3.631   9.745  48.749  1.00 84.20           C
ATOM   1376  CE1 HIS A 170       2.118   9.967  50.247  1.00 84.20           C
ATOM   1377  C   HIS A 170       6.440  11.531  49.300  1.00 84.20           C
ATOM   1378  O   HIS A 170       6.416  10.690  50.195  1.00 84.20           O
ATOM   1379  N   MET A 171       7.326  11.450  48.289  1.00 50.79           N
ATOM   1380  CA  MET A 171       8.293  10.383  48.237  1.00 50.79           C
ATOM   1381  CB  MET A 171       9.115  10.397  46.942  1.00 50.79           C
ATOM   1382  CG  MET A 171      10.107   9.237  46.852  1.00 50.79           C
ATOM   1383  SD  MET A 171       9.329   7.601  46.703  1.00 50.79           S
ATOM   1384  CE  MET A 171      10.897   6.688  46.633  1.00 50.79           C
ATOM   1385  C   MET A 171       9.227  10.516  49.403  1.00 50.79           C
ATOM   1386  O   MET A 171       9.622   9.533  50.032  1.00 50.79           O
ATOM   1387  N   PHE A 172       9.589  11.762  49.745  1.00119.63           N
ATOM   1388  CA  PHE A 172      10.482  11.971  50.841  1.00119.63           C
ATOM   1389  CB  PHE A 172      10.900  13.437  51.021  1.00119.63           C
ATOM   1390  CG  PHE A 172      11.982  13.624  50.014  1.00119.63           C
ATOM   1391  CD1 PHE A 172      11.693  13.909  48.702  1.00119.63           C
ATOM   1392  CD2 PHE A 172      13.299  13.477  50.384  1.00119.63           C
ATOM   1393  CE1 PHE A 172      12.700  14.063  47.782  1.00119.63           C
ATOM   1394  CE2 PHE A 172      14.312  13.631  49.468  1.00119.63           C
ATOM   1395  CZ  PHE A 172      14.013  13.931  48.162  1.00119.63           C
ATOM   1396  C   PHE A 172       9.860  11.417  52.086  1.00119.63           C
ATOM   1397  O   PHE A 172      10.565  10.872  52.933  1.00119.63           O
ATOM   1398  N   THR A 173       8.525  11.516  52.239  1.00130.87           N
ATOM   1399  CA  THR A 173       7.916  11.008  53.438  1.00130.87           C
ATOM   1400  CB  THR A 173       6.428  11.217  53.557  1.00130.87           C
ATOM   1401  OG1 THR A 173       5.718  10.394  52.646  1.00130.87           O
ATOM   1402  CG2 THR A 173       6.118  12.699  53.293  1.00130.87           C
ATOM   1403  C   THR A 173       8.165   9.525  53.553  1.00130.87           C
ATOM   1404  O   THR A 173       8.331   9.032  54.664  1.00130.87           O
ATOM   1405  N   PHE A 174       8.116   8.764  52.434  1.00128.99           N
ATOM   1406  CA  PHE A 174       8.371   7.336  52.413  1.00128.99           C
ATOM   1407  CB  PHE A 174       8.054   6.651  51.068  1.00128.99           C
ATOM   1408  CG  PHE A 174       6.640   6.205  50.990  1.00128.99           C
ATOM   1409  CD1 PHE A 174       6.254   5.083  51.685  1.00128.99           C
ATOM   1410  CD2 PHE A 174       5.724   6.863  50.204  1.00128.99           C
ATOM   1411  CE1 PHE A 174       4.960   4.632  51.626  1.00128.99           C
ATOM   1412  CE2 PHE A 174       4.427   6.413  50.139  1.00128.99           C
ATOM   1413  CZ  PHE A 174       4.044   5.301  50.852  1.00128.99           C
ATOM   1414  C   PHE A 174       9.808   6.948  52.620  1.00128.99           C
ATOM   1415  O   PHE A 174      10.116   6.051  53.405  1.00128.99           O
ATOM   1416  N   LEU A 175      10.725   7.602  51.884  1.00 99.82           N
ATOM   1417  CA  LEU A 175      12.105   7.200  51.807  1.00 99.82           C
ATOM   1418  CB  LEU A 175      12.897   8.016  50.768  1.00 99.82           C
ATOM   1419  CG  LEU A 175      14.338   7.514  50.565  1.00 99.82           C
ATOM   1420  CD1 LEU A 175      14.349   6.112  49.933  1.00 99.82           C
ATOM   1421  CD2 LEU A 175      15.184   8.528  49.778  1.00 99.82           C
ATOM   1422  C   LEU A 175      12.787   7.363  53.130  1.00 99.82           C
ATOM   1423  O   LEU A 175      13.665   6.579  53.486  1.00 99.82           O
ATOM   1424  N   PHE A 176      12.420   8.426  53.863  1.00116.13           N
ATOM   1425  CA  PHE A 176      12.957   8.803  55.144  1.00116.13           C
ATOM   1426  CB  PHE A 176      12.703  10.267  55.521  1.00116.13           C
ATOM   1427  CG  PHE A 176      13.800  11.025  54.859  1.00116.13           C
ATOM   1428  CD1 PHE A 176      13.693  11.477  53.564  1.00116.13           C
ATOM   1429  CD2 PHE A 176      14.961  11.261  55.556  1.00116.13           C
ATOM   1430  CE1 PHE A 176      14.731  12.170  52.987  1.00116.13           C
ATOM   1431  CE2 PHE A 176      15.999  11.951  54.983  1.00116.13           C
ATOM   1432  CZ  PHE A 176      15.885  12.407  53.695  1.00116.13           C
ATOM   1433  C   PHE A 176      12.514   7.933  56.273  1.00116.13           C
ATOM   1434  O   PHE A 176      13.058   8.046  57.372  1.00116.13           O
ATOM   1435  N   ASP A 177      11.427   7.165  56.099  1.00111.74           N
ATOM   1436  CA  ASP A 177      11.087   6.252  57.149  1.00111.74           C
ATOM   1437  CB  ASP A 177       9.680   5.648  57.009  1.00111.74           C
ATOM   1438  CG  ASP A 177       8.682   6.767  57.265  1.00111.74           C
ATOM   1439  OD1 ASP A 177       9.082   7.779  57.900  1.00111.74           O
ATOM   1440  OD2 ASP A 177       7.509   6.630  56.825  1.00111.74           O
ATOM   1441  C   ASP A 177      12.102   5.145  57.073  1.00111.74           C
ATOM   1442  O   ASP A 177      13.049   5.217  56.293  1.00111.74           O
ATOM   1443  N   ASP A 178      11.951   4.112  57.925  1.00 62.07           N
ATOM   1444  CA  ASP A 178      12.841   2.979  57.987  1.00 62.07           C
ATOM   1445  CB  ASP A 178      12.525   2.032  59.157  1.00 62.07           C
ATOM   1446  CG  ASP A 178      12.956   2.725  60.441  1.00 62.07           C
ATOM   1447  OD1 ASP A 178      13.431   3.890  60.356  1.00 62.07           O
ATOM   1448  OD2 ASP A 178      12.826   2.095  61.524  1.00 62.07           O
ATOM   1449  C   ASP A 178      12.727   2.183  56.717  1.00 62.07           C
ATOM   1450  O   ASP A 178      13.621   1.411  56.371  1.00 62.07           O
ATOM   1451  N   ILE A 179      11.604   2.355  55.999  1.00121.13           N
ATOM   1452  CA  ILE A 179      11.282   1.676  54.772  1.00121.13           C
ATOM   1453  CB  ILE A 179      10.000   2.166  54.159  1.00121.13           C
ATOM   1454  CG1 ILE A 179       8.829   1.992  55.140  1.00121.13           C
ATOM   1455  CG2 ILE A 179       9.789   1.413  52.835  1.00121.13           C
ATOM   1456  CD1 ILE A 179       8.547   0.534  55.499  1.00121.13           C
ATOM   1457  C   ILE A 179      12.374   1.950  53.778  1.00121.13           C
ATOM   1458  O   ILE A 179      12.526   1.238  52.786  1.00121.13           O
ATOM   1459  N   GLY A 180      13.097   3.064  53.971  1.00 55.73           N
ATOM   1460  CA  GLY A 180      14.183   3.453  53.114  1.00 55.73           C
ATOM   1461  C   GLY A 180      15.242   2.385  53.090  1.00 55.73           C
ATOM   1462  O   GLY A 180      15.964   2.270  52.101  1.00 55.73           O
ATOM   1463  N   VAL A 181      15.456   1.638  54.197  1.00133.38           N
ATOM   1464  CA  VAL A 181      16.419   0.574  54.090  1.00133.38           C
ATOM   1465  CB  VAL A 181      17.675   0.795  54.894  1.00133.38           C
ATOM   1466  CG1 VAL A 181      17.327   1.006  56.375  1.00133.38           C
ATOM   1467  CG2 VAL A 181      18.607  -0.403  54.639  1.00133.38           C
ATOM   1468  C   VAL A 181      15.793  -0.740  54.485  1.00133.38           C
ATOM   1469  O   VAL A 181      15.680  -1.065  55.666  1.00133.38           O
ATOM   1470  N   PRO A 182      15.421  -1.535  53.511  1.00 76.32           N
ATOM   1471  CA  PRO A 182      14.853  -2.821  53.806  1.00 76.32           C
ATOM   1472  CD  PRO A 182      14.897  -0.992  52.266  1.00 76.32           C
ATOM   1473  CB  PRO A 182      14.247  -3.322  52.499  1.00 76.32           C
ATOM   1474  CG  PRO A 182      13.881  -2.027  51.754  1.00 76.32           C
ATOM   1475  C   PRO A 182      15.902  -3.732  54.358  1.00 76.32           C
ATOM   1476  O   PRO A 182      17.077  -3.561  54.032  1.00 76.32           O
ATOM   1477  N   ALA A 183      15.498  -4.681  55.225  1.00 41.45           N
ATOM   1478  CA  ALA A 183      16.417  -5.624  55.790  1.00 41.45           C
ATOM   1479  CB  ALA A 183      15.764  -6.529  56.847  1.00 41.45           C
ATOM   1480  C   ALA A 183      16.914  -6.488  54.680  1.00 41.45           C
ATOM   1481  O   ALA A 183      18.089  -6.850  54.641  1.00 41.45           O
ATOM   1482  N   ASN A 184      16.020  -6.879  53.752  1.00129.94           N
ATOM   1483  CA  ASN A 184      16.508  -7.668  52.667  1.00129.94           C
ATOM   1484  CB  ASN A 184      16.684  -9.141  53.065  1.00129.94           C
ATOM   1485  CG  ASN A 184      17.729  -9.768  52.165  1.00129.94           C
ATOM   1486  OD1 ASN A 184      17.481 -10.101  51.007  1.00129.94           O
ATOM   1487  ND2 ASN A 184      18.950  -9.922  52.737  1.00129.94           N
ATOM   1488  C   ASN A 184      15.503  -7.599  51.555  1.00129.94           C
ATOM   1489  O   ASN A 184      14.387  -7.111  51.726  1.00129.94           O
ATOM   1490  N   TYR A 185      15.896  -8.115  50.375  1.00 90.79           N
ATOM   1491  CA  TYR A 185      15.084  -8.122  49.194  1.00 90.79           C
ATOM   1492  CB  TYR A 185      15.783  -8.725  47.962  1.00 90.79           C
ATOM   1493  CG  TYR A 185      16.913  -7.841  47.546  1.00 90.79           C
ATOM   1494  CD1 TYR A 185      16.670  -6.556  47.118  1.00 90.79           C
ATOM   1495  CD2 TYR A 185      18.210  -8.303  47.542  1.00 90.79           C
ATOM   1496  CE1 TYR A 185      17.700  -5.738  46.718  1.00 90.79           C
ATOM   1497  CE2 TYR A 185      19.247  -7.491  47.142  1.00 90.79           C
ATOM   1498  CZ  TYR A 185      18.993  -6.204  46.731  1.00 90.79           C
ATOM   1499  OH  TYR A 185      20.050  -5.365  46.320  1.00 90.79           O
ATOM   1500  C   TYR A 185      13.840  -8.931  49.440  1.00 90.79           C
ATOM   1501  O   TYR A 185      12.776  -8.602  48.921  1.00 90.79           O
ATOM   1502  N   ARG A 186      13.950 -10.047  50.190  1.00144.14           N
ATOM   1503  CA  ARG A 186      12.829 -10.917  50.448  1.00144.14           C
ATOM   1504  CB  ARG A 186      13.220 -12.305  50.998  1.00144.14           C
ATOM   1505  CG  ARG A 186      13.922 -12.338  52.355  1.00144.14           C
ATOM   1506  CD  ARG A 186      14.324 -13.761  52.755  1.00144.14           C
ATOM   1507  NE  ARG A 186      14.670 -13.769  54.204  1.00144.14           N
ATOM   1508  CZ  ARG A 186      14.816 -14.961  54.853  1.00144.14           C
ATOM   1509  NH1 ARG A 186      14.678 -16.130  54.165  1.00144.14           N
ATOM   1510  NH2 ARG A 186      15.104 -14.993  56.185  1.00144.14           N
ATOM   1511  C   ARG A 186      11.837 -10.274  51.381  1.00144.14           C
ATOM   1512  O   ARG A 186      10.660 -10.624  51.378  1.00144.14           O
ATOM   1513  N   HIS A 187      12.330  -9.375  52.251  1.00119.79           N
ATOM   1514  CA  HIS A 187      11.681  -8.618  53.294  1.00119.79           C
ATOM   1515  ND1 HIS A 187      12.583  -9.726  56.289  1.00119.79           N
ATOM   1516  CG  HIS A 187      13.250  -9.155  55.228  1.00119.79           C
ATOM   1517  CB  HIS A 187      12.662  -8.090  54.352  1.00119.79           C
ATOM   1518  NE2 HIS A 187      14.598 -10.663  56.226  1.00119.79           N
ATOM   1519  CD2 HIS A 187      14.479  -9.740  55.202  1.00119.79           C
ATOM   1520  CE1 HIS A 187      13.435 -10.619  56.851  1.00119.79           C
ATOM   1521  C   HIS A 187      10.915  -7.411  52.813  1.00119.79           C
ATOM   1522  O   HIS A 187      10.548  -6.578  53.644  1.00119.79           O
ATOM   1523  N   MET A 188      10.797  -7.162  51.493  1.00119.11           N
ATOM   1524  CA  MET A 188      10.174  -5.925  51.080  1.00119.11           C
ATOM   1525  CB  MET A 188      11.139  -5.007  50.314  1.00119.11           C
ATOM   1526  CG  MET A 188      11.580  -5.603  48.974  1.00119.11           C
ATOM   1527  SD  MET A 188      12.720  -4.565  48.012  1.00119.11           S
ATOM   1528  CE  MET A 188      12.932  -5.773  46.672  1.00119.11           C
ATOM   1529  C   MET A 188       9.007  -6.157  50.157  1.00119.11           C
ATOM   1530  O   MET A 188       8.793  -7.254  49.645  1.00119.11           O
ATOM   1531  N   GLU A 189       8.202  -5.086  49.954  1.00 98.42           N
ATOM   1532  CA  GLU A 189       7.040  -5.086  49.102  1.00 98.42           C
ATOM   1533  CB  GLU A 189       5.905  -4.173  49.604  1.00 98.42           C
ATOM   1534  CG  GLU A 189       6.292  -2.694  49.673  1.00 98.42           C
ATOM   1535  CD  GLU A 189       5.062  -1.884  50.070  1.00 98.42           C
ATOM   1536  OE1 GLU A 189       4.409  -2.246  51.085  1.00 98.42           O
ATOM   1537  OE2 GLU A 189       4.758  -0.890  49.356  1.00 98.42           O
ATOM   1538  C   GLU A 189       7.426  -4.581  47.741  1.00 98.42           C
ATOM   1539  O   GLU A 189       8.570  -4.190  47.510  1.00 98.42           O
ATOM   1540  N   GLY A 190       6.461  -4.613  46.791  1.00 35.53           N
ATOM   1541  CA  GLY A 190       6.687  -4.129  45.454  1.00 35.53           C
ATOM   1542  C   GLY A 190       5.510  -3.282  45.059  1.00 35.53           C
ATOM   1543  O   GLY A 190       4.401  -3.478  45.557  1.00 35.53           O
ATOM   1544  N   SER A 191       5.733  -2.309  44.143  1.00 91.51           N
ATOM   1545  CA  SER A 191       4.673  -1.449  43.690  1.00 91.51           C
ATOM   1546  CB  SER A 191       4.531  -0.180  44.547  1.00 91.51           C
ATOM   1547  OG  SER A 191       5.770   0.509  44.594  1.00 91.51           O
ATOM   1548  C   SER A 191       4.917  -1.040  42.264  1.00 91.51           C
ATOM   1549  O   SER A 191       6.046  -0.770  41.862  1.00 91.51           O
ATOM   1550  N   GLY A 192       3.844  -1.002  41.445  1.00 49.40           N
ATOM   1551  CA  GLY A 192       3.943  -0.578  40.071  1.00 49.40           C
ATOM   1552  C   GLY A 192       4.275   0.883  40.052  1.00 49.40           C
ATOM   1553  O   GLY A 192       4.926   1.387  39.138  1.00 49.40           O
ATOM   1554  N   VAL A 193       3.751   1.600  41.058  1.00 99.89           N
ATOM   1555  CA  VAL A 193       3.901   3.017  41.253  1.00 99.89           C
ATOM   1556  CB  VAL A 193       5.314   3.487  41.038  1.00 99.89           C
ATOM   1557  CG1 VAL A 193       5.359   5.020  41.160  1.00 99.89           C
ATOM   1558  CG2 VAL A 193       6.230   2.760  42.035  1.00 99.89           C
ATOM   1559  C   VAL A 193       3.017   3.741  40.278  1.00 99.89           C
ATOM   1560  O   VAL A 193       2.249   4.619  40.669  1.00 99.89           O
ATOM   1561  N   ASN A 194       3.009   3.313  39.002  1.00 85.49           N
ATOM   1562  CA  ASN A 194       2.205   3.972  38.013  1.00 85.49           C
ATOM   1563  CB  ASN A 194       2.914   4.097  36.653  1.00 85.49           C
ATOM   1564  CG  ASN A 194       4.167   4.938  36.861  1.00 85.49           C
ATOM   1565  OD1 ASN A 194       5.260   4.563  36.440  1.00 85.49           O
ATOM   1566  ND2 ASN A 194       4.011   6.109  37.534  1.00 85.49           N
ATOM   1567  C   ASN A 194       0.975   3.154  37.801  1.00 85.49           C
ATOM   1568  O   ASN A 194       0.919   1.977  38.155  1.00 85.49           O
ATOM   1569  N   THR A 195      -0.072   3.803  37.264  1.00125.27           N
ATOM   1570  CA  THR A 195      -1.244   3.118  36.833  1.00125.27           C
ATOM   1571  CB  THR A 195      -2.443   4.024  36.759  1.00125.27           C
ATOM   1572  OG1 THR A 195      -3.580   3.316  36.288  1.00125.27           O
ATOM   1573  CG2 THR A 195      -2.119   5.230  35.858  1.00125.27           C
ATOM   1574  C   THR A 195      -0.916   2.614  35.462  1.00125.27           C
ATOM   1575  O   THR A 195      -0.042   3.155  34.784  1.00125.27           O
ATOM   1576  N   TYR A 196      -1.588   1.523  35.052  1.00 73.01           N
ATOM   1577  CA  TYR A 196      -1.450   0.938  33.748  1.00 73.01           C
ATOM   1578  CB  TYR A 196      -0.797  -0.463  33.748  1.00 73.01           C
ATOM   1579  CG  TYR A 196       0.670  -0.371  34.028  1.00 73.01           C
ATOM   1580  CD1 TYR A 196       1.563  -0.222  32.990  1.00 73.01           C
ATOM   1581  CD2 TYR A 196       1.161  -0.444  35.312  1.00 73.01           C
ATOM   1582  CE1 TYR A 196       2.916  -0.144  33.223  1.00 73.01           C
ATOM   1583  CE2 TYR A 196       2.514  -0.366  35.556  1.00 73.01           C
ATOM   1584  CZ  TYR A 196       3.394  -0.215  34.509  1.00 73.01           C
ATOM   1585  OH  TYR A 196       4.782  -0.135  34.749  1.00 73.01           O
ATOM   1586  C   TYR A 196      -2.855   0.754  33.258  1.00 73.01           C
ATOM   1587  O   TYR A 196      -3.810   1.053  33.973  1.00 73.01           O
ATOM   1588  N   MET A 197      -3.019   0.305  31.999  1.00 80.27           N
ATOM   1589  CA  MET A 197      -4.337   0.085  31.481  1.00 80.27           C
ATOM   1590  CB  MET A 197      -4.620   0.849  30.178  1.00 80.27           C
ATOM   1591  CG  MET A 197      -4.737   2.357  30.388  1.00 80.27           C
ATOM   1592  SD  MET A 197      -6.209   2.838  31.334  1.00 80.27           S
ATOM   1593  CE  MET A 197      -7.357   2.294  30.038  1.00 80.27           C
ATOM   1594  C   MET A 197      -4.488  -1.369  31.173  1.00 80.27           C
ATOM   1595  O   MET A 197      -3.601  -1.998  30.596  1.00 80.27           O
ATOM   1596  N   LEU A 198      -5.632  -1.942  31.587  1.00 53.90           N
ATOM   1597  CA  LEU A 198      -5.937  -3.306  31.290  1.00 53.90           C
ATOM   1598  CB  LEU A 198      -6.155  -4.158  32.552  1.00 53.90           C
ATOM   1599  CG  LEU A 198      -4.863  -4.354  33.373  1.00 53.90           C
ATOM   1600  CD1 LEU A 198      -4.269  -3.009  33.820  1.00 53.90           C
ATOM   1601  CD2 LEU A 198      -5.086  -5.314  34.550  1.00 53.90           C
ATOM   1602  C   LEU A 198      -7.207  -3.268  30.505  1.00 53.90           C
ATOM   1603  O   LEU A 198      -8.152  -2.571  30.876  1.00 53.90           O
ATOM   1604  N   ILE A 199      -7.244  -3.998  29.375  1.00 84.35           N
ATOM   1605  CA  ILE A 199      -8.419  -4.006  28.552  1.00 84.35           C
ATOM   1606  CB  ILE A 199      -8.195  -3.469  27.168  1.00 84.35           C
ATOM   1607  CG1 ILE A 199      -9.543  -3.123  26.514  1.00 84.35           C
ATOM   1608  CG2 ILE A 199      -7.362  -4.492  26.375  1.00 84.35           C
ATOM   1609  CD1 ILE A 199      -9.409  -2.285  25.247  1.00 84.35           C
ATOM   1610  C   ILE A 199      -8.868  -5.429  28.428  1.00 84.35           C
ATOM   1611  O   ILE A 199      -8.051  -6.338  28.288  1.00 84.35           O
ATOM   1612  N   ASN A 200     -10.195  -5.651  28.511  1.00 60.07           N
ATOM   1613  CA  ASN A 200     -10.768  -6.966  28.440  1.00 60.07           C
ATOM   1614  CB  ASN A 200     -12.012  -7.145  29.333  1.00 60.07           C
ATOM   1615  CG  ASN A 200     -13.115  -6.194  28.889  1.00 60.07           C
ATOM   1616  OD1 ASN A 200     -12.973  -5.457  27.914  1.00 60.07           O
ATOM   1617  ND2 ASN A 200     -14.251  -6.205  29.636  1.00 60.07           N
ATOM   1618  C   ASN A 200     -11.122  -7.288  27.018  1.00 60.07           C
ATOM   1619  O   ASN A 200     -10.895  -6.490  26.111  1.00 60.07           O
ATOM   1620  N   LYS A 201     -11.686  -8.494  26.798  1.00 84.52           N
ATOM   1621  CA  LYS A 201     -12.012  -8.972  25.482  1.00 84.52           C
ATOM   1622  CB  LYS A 201     -12.613 -10.390  25.470  1.00 84.52           C
ATOM   1623  CG  LYS A 201     -12.941 -10.882  24.055  1.00 84.52           C
ATOM   1624  CD  LYS A 201     -13.155 -12.394  23.948  1.00 84.52           C
ATOM   1625  CE  LYS A 201     -13.353 -12.881  22.510  1.00 84.52           C
ATOM   1626  NZ  LYS A 201     -13.364 -14.362  22.469  1.00 84.52           N
ATOM   1627  C   LYS A 201     -13.001  -8.040  24.847  1.00 84.52           C
ATOM   1628  O   LYS A 201     -12.998  -7.856  23.630  1.00 84.52           O
ATOM   1629  N   ALA A 202     -13.896  -7.458  25.665  1.00 43.12           N
ATOM   1630  CA  ALA A 202     -14.898  -6.527  25.227  1.00 43.12           C
ATOM   1631  CB  ALA A 202     -15.851  -6.096  26.357  1.00 43.12           C
ATOM   1632  C   ALA A 202     -14.236  -5.289  24.698  1.00 43.12           C
ATOM   1633  O   ALA A 202     -14.734  -4.669  23.760  1.00 43.12           O
ATOM   1634  N   GLY A 203     -13.090  -4.886  25.282  1.00 35.65           N
ATOM   1635  CA  GLY A 203     -12.456  -3.675  24.846  1.00 35.65           C
ATOM   1636  C   GLY A 203     -12.686  -2.607  25.868  1.00 35.65           C
ATOM   1637  O   GLY A 203     -12.400  -1.435  25.623  1.00 35.65           O
ATOM   1638  N   LYS A 204     -13.254  -2.968  27.036  1.00 94.11           N
ATOM   1639  CA  LYS A 204     -13.400  -1.980  28.067  1.00 94.11           C
ATOM   1640  CB  LYS A 204     -14.538  -2.286  29.060  1.00 94.11           C
ATOM   1641  CG  LYS A 204     -15.924  -2.154  28.417  1.00 94.11           C
ATOM   1642  CD  LYS A 204     -17.082  -2.670  29.276  1.00 94.11           C
ATOM   1643  CE  LYS A 204     -18.454  -2.528  28.609  1.00 94.11           C
ATOM   1644  NZ  LYS A 204     -18.726  -3.694  27.741  1.00 94.11           N
ATOM   1645  C   LYS A 204     -12.092  -1.885  28.794  1.00 94.11           C
ATOM   1646  O   LYS A 204     -11.445  -2.894  29.076  1.00 94.11           O
ATOM   1647  N   ALA A 205     -11.661  -0.648  29.124  1.00 35.82           N
ATOM   1648  CA  ALA A 205     -10.378  -0.489  29.748  1.00 35.82           C
ATOM   1649  CB  ALA A 205      -9.438   0.460  28.983  1.00 35.82           C
ATOM   1650  C   ALA A 205     -10.535   0.080  31.121  1.00 35.82           C
ATOM   1651  O   ALA A 205     -11.405   0.911  31.377  1.00 35.82           O
ATOM   1652  N   TYR A 206      -9.676  -0.382  32.053  1.00146.59           N
ATOM   1653  CA  TYR A 206      -9.684   0.118  33.400  1.00146.59           C
ATOM   1654  CB  TYR A 206     -10.234  -0.906  34.409  1.00146.59           C
ATOM   1655  CG  TYR A 206     -11.682  -1.138  34.109  1.00146.59           C
ATOM   1656  CD1 TYR A 206     -12.068  -1.746  32.935  1.00146.59           C
ATOM   1657  CD2 TYR A 206     -12.655  -0.777  35.014  1.00146.59           C
ATOM   1658  CE1 TYR A 206     -13.398  -1.971  32.660  1.00146.59           C
ATOM   1659  CE2 TYR A 206     -13.987  -1.000  34.746  1.00146.59           C
ATOM   1660  CZ  TYR A 206     -14.361  -1.597  33.565  1.00146.59           C
ATOM   1661  OH  TYR A 206     -15.725  -1.831  33.284  1.00146.59           O
ATOM   1662  C   TYR A 206      -8.256   0.431  33.774  1.00146.59           C
ATOM   1663  O   TYR A 206      -7.323  -0.135  33.208  1.00146.59           O
ATOM   1664  N   TYR A 207      -8.054   1.379  34.720  1.00130.97           N
ATOM   1665  CA  TYR A 207      -6.740   1.739  35.201  1.00130.97           C
ATOM   1666  CB  TYR A 207      -6.618   3.173  35.742  1.00130.97           C
ATOM   1667  CG  TYR A 207      -6.680   4.123  34.602  1.00130.97           C
ATOM   1668  CD1 TYR A 207      -7.890   4.599  34.157  1.00130.97           C
ATOM   1669  CD2 TYR A 207      -5.524   4.531  33.980  1.00130.97           C
ATOM   1670  CE1 TYR A 207      -7.942   5.477  33.102  1.00130.97           C
ATOM   1671  CE2 TYR A 207      -5.570   5.409  32.926  1.00130.97           C
ATOM   1672  CZ  TYR A 207      -6.782   5.881  32.488  1.00130.97           C
ATOM   1673  OH  TYR A 207      -6.835   6.782  31.405  1.00130.97           O
ATOM   1674  C   TYR A 207      -6.396   0.834  36.343  1.00130.97           C
ATOM   1675  O   TYR A 207      -7.220   0.599  37.227  1.00130.97           O
ATOM   1676  N   VAL A 208      -5.152   0.303  36.354  1.00 45.65           N
ATOM   1677  CA  VAL A 208      -4.776  -0.634  37.374  1.00 45.65           C
ATOM   1678  CB  VAL A 208      -4.639  -2.033  36.832  1.00 45.65           C
ATOM   1679  CG1 VAL A 208      -4.073  -2.957  37.922  1.00 45.65           C
ATOM   1680  CG2 VAL A 208      -6.004  -2.484  36.288  1.00 45.65           C
ATOM   1681  C   VAL A 208      -3.451  -0.264  37.976  1.00 45.65           C
ATOM   1682  O   VAL A 208      -2.592   0.328  37.324  1.00 45.65           O
ATOM   1683  N   LYS A 209      -3.284  -0.611  39.271  1.00127.79           N
ATOM   1684  CA  LYS A 209      -2.070  -0.446  40.019  1.00127.79           C
ATOM   1685  CB  LYS A 209      -2.289   0.377  41.300  1.00127.79           C
ATOM   1686  CG  LYS A 209      -1.039   1.102  41.790  1.00127.79           C
ATOM   1687  CD  LYS A 209      -0.669   2.292  40.901  1.00127.79           C
ATOM   1688  CE  LYS A 209      -1.266   3.618  41.375  1.00127.79           C
ATOM   1689  NZ  LYS A 209      -0.838   4.712  40.480  1.00127.79           N
ATOM   1690  C   LYS A 209      -1.715  -1.846  40.444  1.00127.79           C
ATOM   1691  O   LYS A 209      -2.606  -2.671  40.646  1.00127.79           O
ATOM   1692  N   PHE A 210      -0.411  -2.170  40.572  1.00106.01           N
ATOM   1693  CA  PHE A 210      -0.046  -3.516  40.935  1.00106.01           C
ATOM   1694  CB  PHE A 210       0.801  -4.221  39.860  1.00106.01           C
ATOM   1695  CG  PHE A 210      -0.096  -4.472  38.689  1.00106.01           C
ATOM   1696  CD1 PHE A 210      -0.315  -3.493  37.747  1.00106.01           C
ATOM   1697  CD2 PHE A 210      -0.733  -5.684  38.532  1.00106.01           C
ATOM   1698  CE1 PHE A 210      -1.144  -3.714  36.671  1.00106.01           C
ATOM   1699  CE2 PHE A 210      -1.564  -5.911  37.457  1.00106.01           C
ATOM   1700  CZ  PHE A 210      -1.765  -4.929  36.516  1.00106.01           C
ATOM   1701  C   PHE A 210       0.712  -3.483  42.230  1.00106.01           C
ATOM   1702  O   PHE A 210       1.489  -2.562  42.480  1.00106.01           O
ATOM   1703  N   HIS A 211       0.480  -4.500  43.097  1.00 82.29           N
ATOM   1704  CA  HIS A 211       1.088  -4.530  44.399  1.00 82.29           C
ATOM   1705  ND1 HIS A 211      -1.063  -1.964  46.257  1.00 82.29           N
ATOM   1706  CG  HIS A 211      -0.056  -2.594  45.561  1.00 82.29           C
ATOM   1707  CB  HIS A 211       0.153  -4.078  45.538  1.00 82.29           C
ATOM   1708  NE2 HIS A 211       0.118  -0.363  45.265  1.00 82.29           N
ATOM   1709  CD2 HIS A 211       0.657  -1.601  44.962  1.00 82.29           C
ATOM   1710  CE1 HIS A 211      -0.912  -0.632  46.046  1.00 82.29           C
ATOM   1711  C   HIS A 211       1.584  -5.905  44.743  1.00 82.29           C
ATOM   1712  O   HIS A 211       0.930  -6.915  44.482  1.00 82.29           O
ATOM   1713  N   TRP A 212       2.785  -5.959  45.361  1.00 67.12           N
ATOM   1714  CA  TRP A 212       3.358  -7.208  45.781  1.00 67.12           C
ATOM   1715  CB  TRP A 212       4.773  -7.445  45.223  1.00 67.12           C
ATOM   1716  CG  TRP A 212       4.837  -7.542  43.718  1.00 67.12           C
ATOM   1717  CD2 TRP A 212       4.748  -8.767  42.971  1.00 67.12           C
ATOM   1718  CD1 TRP A 212       4.992  -6.543  42.802  1.00 67.12           C
ATOM   1719  NE1 TRP A 212       5.003  -7.066  41.531  1.00 67.12           N
ATOM   1720  CE2 TRP A 212       4.855  -8.434  41.620  1.00 67.12           C
ATOM   1721  CE3 TRP A 212       4.592 -10.061  43.377  1.00 67.12           C
ATOM   1722  CZ2 TRP A 212       4.807  -9.396  40.651  1.00 67.12           C
ATOM   1723  CZ3 TRP A 212       4.541 -11.027  42.396  1.00 67.12           C
ATOM   1724  CH2 TRP A 212       4.647 -10.701  41.061  1.00 67.12           C
ATOM   1725  C   TRP A 212       3.486  -7.154  47.275  1.00 67.12           C
ATOM   1726  O   TRP A 212       3.988  -6.172  47.822  1.00 67.12           O
ATOM   1727  N   LYS A 213       3.015  -8.212  47.975  1.00128.55           N
ATOM   1728  CA  LYS A 213       3.134  -8.257  49.410  1.00128.55           C
ATOM   1729  CB  LYS A 213       1.787  -8.316  50.152  1.00128.55           C
ATOM   1730  CG  LYS A 213       0.997  -7.012  50.063  1.00128.55           C
ATOM   1731  CD  LYS A 213       1.763  -5.804  50.608  1.00128.55           C
ATOM   1732  CE  LYS A 213       0.954  -4.505  50.569  1.00128.55           C
ATOM   1733  NZ  LYS A 213       0.432  -4.280  49.203  1.00128.55           N
ATOM   1734  C   LYS A 213       3.906  -9.492  49.763  1.00128.55           C
ATOM   1735  O   LYS A 213       3.579 -10.588  49.314  1.00128.55           O
ATOM   1736  N   PRO A 214       4.941  -9.341  50.549  1.00 86.10           N
ATOM   1737  CA  PRO A 214       5.776 -10.463  50.898  1.00 86.10           C
ATOM   1738  CD  PRO A 214       5.660  -8.082  50.639  1.00 86.10           C
ATOM   1739  CB  PRO A 214       7.142  -9.884  51.267  1.00 86.10           C
ATOM   1740  CG  PRO A 214       6.868  -8.395  51.540  1.00 86.10           C
ATOM   1741  C   PRO A 214       5.206 -11.338  51.969  1.00 86.10           C
ATOM   1742  O   PRO A 214       4.614 -10.823  52.917  1.00 86.10           O
ATOM   1743  N   THR A 215       5.409 -12.664  51.848  1.00107.92           N
ATOM   1744  CA  THR A 215       4.966 -13.599  52.841  1.00107.92           C
ATOM   1745  CB  THR A 215       5.118 -15.028  52.400  1.00107.92           C
ATOM   1746  OG1 THR A 215       4.614 -15.909  53.393  1.00107.92           O
ATOM   1747  CG2 THR A 215       6.599 -15.319  52.120  1.00107.92           C
ATOM   1748  C   THR A 215       5.770 -13.370  54.087  1.00107.92           C
ATOM   1749  O   THR A 215       5.261 -13.482  55.201  1.00107.92           O
ATOM   1750  N   CYS A 216       7.062 -13.037  53.906  1.00 92.90           N
ATOM   1751  CA  CYS A 216       8.016 -12.783  54.952  1.00 92.90           C
ATOM   1752  CB  CYS A 216       9.445 -12.565  54.428  1.00 92.90           C
ATOM   1753  SG  CYS A 216      10.618 -12.235  55.773  1.00 92.90           S
ATOM   1754  C   CYS A 216       7.646 -11.542  55.707  1.00 92.90           C
ATOM   1755  O   CYS A 216       8.079 -11.350  56.842  1.00 92.90           O
ATOM   1756  N   GLY A 217       6.899 -10.622  55.076  1.00 24.79           N
ATOM   1757  CA  GLY A 217       6.535  -9.419  55.765  1.00 24.79           C
ATOM   1758  C   GLY A 217       7.554  -8.389  55.413  1.00 24.79           C
ATOM   1759  O   GLY A 217       8.645  -8.712  54.942  1.00 24.79           O
ATOM   1760  N   VAL A 218       7.227  -7.105  55.643  1.00101.10           N
ATOM   1761  CA  VAL A 218       8.201  -6.114  55.311  1.00101.10           C
ATOM   1762  CB  VAL A 218       7.609  -4.853  54.738  1.00101.10           C
ATOM   1763  CG1 VAL A 218       6.894  -4.060  55.843  1.00101.10           C
ATOM   1764  CG2 VAL A 218       8.716  -4.085  54.002  1.00101.10           C
ATOM   1765  C   VAL A 218       8.980  -5.815  56.554  1.00101.10           C
ATOM   1766  O   VAL A 218       8.416  -5.505  57.602  1.00101.10           O
ATOM   1767  N   LYS A 219      10.319  -5.956  56.470  1.00 43.65           N
ATOM   1768  CA  LYS A 219      11.163  -5.692  57.599  1.00 43.65           C
ATOM   1769  CB  LYS A 219      11.900  -6.939  58.118  1.00 43.65           C
ATOM   1770  CG  LYS A 219      10.944  -7.951  58.752  1.00 43.65           C
ATOM   1771  CD  LYS A 219      11.573  -9.307  59.074  1.00 43.65           C
ATOM   1772  CE  LYS A 219      10.618 -10.248  59.815  1.00 43.65           C
ATOM   1773  NZ  LYS A 219      11.338 -11.468  60.244  1.00 43.65           N
ATOM   1774  C   LYS A 219      12.175  -4.672  57.180  1.00 43.65           C
ATOM   1775  O   LYS A 219      12.703  -4.720  56.069  1.00 43.65           O
ATOM   1776  N   SER A 220      12.485  -3.717  58.080  1.00 37.21           N
ATOM   1777  CA  SER A 220      13.365  -2.640  57.720  1.00 37.21           C
ATOM   1778  CB  SER A 220      12.655  -1.277  57.699  1.00 37.21           C
ATOM   1779  OG  SER A 220      11.625  -1.278  56.721  1.00 37.21           O
ATOM   1780  C   SER A 220      14.465  -2.533  58.728  1.00 37.21           C
ATOM   1781  O   SER A 220      14.450  -3.189  59.768  1.00 37.21           O
ATOM   1782  N   LEU A 221      15.480  -1.708  58.408  1.00 54.42           N
ATOM   1783  CA  LEU A 221      16.581  -1.491  59.299  1.00 54.42           C
ATOM   1784  CB  LEU A 221      17.948  -1.763  58.654  1.00 54.42           C
ATOM   1785  CG  LEU A 221      18.141  -3.201  58.140  1.00 54.42           C
ATOM   1786  CD1 LEU A 221      19.536  -3.369  57.517  1.00 54.42           C
ATOM   1787  CD2 LEU A 221      17.845  -4.244  59.228  1.00 54.42           C
ATOM   1788  C   LEU A 221      16.582  -0.045  59.691  1.00 54.42           C
ATOM   1789  O   LEU A 221      16.251   0.829  58.892  1.00 54.42           O
ATOM   1790  N   LEU A 222      16.944   0.227  60.961  1.00 58.87           N
ATOM   1791  CA  LEU A 222      17.106   1.562  61.468  1.00 58.87           C
ATOM   1792  CB  LEU A 222      17.261   1.613  63.001  1.00 58.87           C
ATOM   1793  CG  LEU A 222      16.033   1.164  63.817  1.00 58.87           C
ATOM   1794  CD1 LEU A 222      16.320   1.229  65.327  1.00 58.87           C
ATOM   1795  CD2 LEU A 222      14.785   1.976  63.439  1.00 58.87           C
ATOM   1796  C   LEU A 222      18.420   2.013  60.906  1.00 58.87           C
ATOM   1797  O   LEU A 222      19.178   1.203  60.378  1.00 58.87           O
ATOM   1798  N   GLU A 223      18.722   3.323  60.980  1.00111.87           N
ATOM   1799  CA  GLU A 223      19.952   3.801  60.415  1.00111.87           C
ATOM   1800  CB  GLU A 223      20.083   5.331  60.444  1.00111.87           C
ATOM   1801  CG  GLU A 223      21.247   5.839  59.585  1.00111.87           C
ATOM   1802  CD  GLU A 223      20.904   5.577  58.122  1.00111.87           C
ATOM   1803  OE1 GLU A 223      20.739   4.383  57.752  1.00111.87           O
ATOM   1804  OE2 GLU A 223      20.802   6.571  57.355  1.00111.87           O
ATOM   1805  C   GLU A 223      21.118   3.202  61.142  1.00111.87           C
ATOM   1806  O   GLU A 223      22.129   2.862  60.528  1.00111.87           O
ATOM   1807  N   ASP A 224      21.019   3.062  62.476  1.00 96.39           N
ATOM   1808  CA  ASP A 224      22.104   2.504  63.231  1.00 96.39           C
ATOM   1809  CB  ASP A 224      21.906   2.620  64.757  1.00 96.39           C
ATOM   1810  CG  ASP A 224      20.656   1.867  65.193  1.00 96.39           C
ATOM   1811  OD1 ASP A 224      19.556   2.143  64.644  1.00 96.39           O
ATOM   1812  OD2 ASP A 224      20.792   0.998  66.094  1.00 96.39           O
ATOM   1813  C   ASP A 224      22.291   1.067  62.857  1.00 96.39           C
ATOM   1814  O   ASP A 224      23.421   0.588  62.783  1.00 96.39           O
ATOM   1815  N   GLU A 225      21.185   0.336  62.613  1.00 36.95           N
ATOM   1816  CA  GLU A 225      21.275  -1.055  62.266  1.00 36.95           C
ATOM   1817  CB  GLU A 225      19.904  -1.741  62.104  1.00 36.95           C
ATOM   1818  CG  GLU A 225      19.099  -1.896  63.397  1.00 36.95           C
ATOM   1819  CD  GLU A 225      17.802  -2.615  63.043  1.00 36.95           C
ATOM   1820  OE1 GLU A 225      17.511  -2.732  61.823  1.00 36.95           O
ATOM   1821  OE2 GLU A 225      17.088  -3.060  63.980  1.00 36.95           O
ATOM   1822  C   GLU A 225      21.970  -1.180  60.945  1.00 36.95           C
ATOM   1823  O   GLU A 225      22.812  -2.057  60.760  1.00 36.95           O
ATOM   1824  N   ALA A 226      21.638  -0.289  59.990  1.00 28.93           N
ATOM   1825  CA  ALA A 226      22.201  -0.367  58.672  1.00 28.93           C
ATOM   1826  CB  ALA A 226      21.648   0.706  57.718  1.00 28.93           C
ATOM   1827  C   ALA A 226      23.687  -0.186  58.747  1.00 28.93           C
ATOM   1828  O   ALA A 226      24.440  -0.862  58.047  1.00 28.93           O
ATOM   1829  N   ILE A 227      24.151   0.750  59.593  1.00 39.20           N
ATOM   1830  CA  ILE A 227      25.555   1.012  59.730  1.00 39.20           C
ATOM   1831  CB  ILE A 227      25.820   2.226  60.577  1.00 39.20           C
ATOM   1832  CG1 ILE A 227      25.266   3.468  59.850  1.00 39.20           C
ATOM   1833  CG2 ILE A 227      27.323   2.314  60.885  1.00 39.20           C
ATOM   1834  CD1 ILE A 227      25.237   4.738  60.700  1.00 39.20           C
ATOM   1835  C   ILE A 227      26.231  -0.202  60.298  1.00 39.20           C
ATOM   1836  O   ILE A 227      27.314  -0.579  59.852  1.00 39.20           O
ATOM   1837  N   LYS A 228      25.604  -0.859  61.294  1.00 84.61           N
ATOM   1838  CA  LYS A 228      26.203  -2.019  61.898  1.00 84.61           C
ATOM   1839  CB  LYS A 228      25.337  -2.663  62.995  1.00 84.61           C
ATOM   1840  CG  LYS A 228      25.210  -1.849  64.283  1.00 84.61           C
ATOM   1841  CD  LYS A 228      24.164  -2.414  65.249  1.00 84.61           C
ATOM   1842  CE  LYS A 228      24.210  -1.792  66.647  1.00 84.61           C
ATOM   1843  NZ  LYS A 228      23.548  -0.471  66.643  1.00 84.61           N
ATOM   1844  C   LYS A 228      26.371  -3.076  60.852  1.00 84.61           C
ATOM   1845  O   LYS A 228      27.431  -3.690  60.746  1.00 84.61           O
ATOM   1846  N   VAL A 229      25.322  -3.306  60.039  1.00 36.63           N
ATOM   1847  CA  VAL A 229      25.358  -4.339  59.042  1.00 36.63           C
ATOM   1848  CB  VAL A 229      24.059  -4.490  58.309  1.00 36.63           C
ATOM   1849  CG1 VAL A 229      24.261  -5.511  57.177  1.00 36.63           C
ATOM   1850  CG2 VAL A 229      22.971  -4.887  59.319  1.00 36.63           C
ATOM   1851  C   VAL A 229      26.401  -4.027  58.016  1.00 36.63           C
ATOM   1852  O   VAL A 229      27.140  -4.912  57.587  1.00 36.63           O
ATOM   1853  N   GLY A 230      26.510  -2.748  57.613  1.00 29.87           N
ATOM   1854  CA  GLY A 230      27.406  -2.388  56.549  1.00 29.87           C
ATOM   1855  C   GLY A 230      28.814  -2.760  56.897  1.00 29.87           C
ATOM   1856  O   GLY A 230      29.568  -3.216  56.037  1.00 29.87           O
ATOM   1857  N   GLY A 231      29.216  -2.566  58.166  1.00 31.62           N
ATOM   1858  CA  GLY A 231      30.579  -2.834  58.527  1.00 31.62           C
ATOM   1859  C   GLY A 231      30.892  -4.284  58.310  1.00 31.62           C
ATOM   1860  O   GLY A 231      31.993  -4.621  57.874  1.00 31.62           O
ATOM   1861  N   ALA A 232      29.964  -5.176  58.715  1.00 55.28           N
ATOM   1862  CA  ALA A 232      30.117  -6.599  58.569  1.00 55.28           C
ATOM   1863  CB  ALA A 232      29.109  -7.381  59.427  1.00 55.28           C
ATOM   1864  C   ALA A 232      29.965  -7.092  57.153  1.00 55.28           C
ATOM   1865  O   ALA A 232      30.788  -7.880  56.686  1.00 55.28           O
ATOM   1866  N   ASN A 233      28.909  -6.652  56.423  1.00 71.08           N
ATOM   1867  CA  ASN A 233      28.669  -7.242  55.127  1.00 71.08           C
ATOM   1868  CB  ASN A 233      27.666  -8.412  55.221  1.00 71.08           C
ATOM   1869  CG  ASN A 233      27.773  -9.296  53.988  1.00 71.08           C
ATOM   1870  OD1 ASN A 233      27.429  -8.891  52.882  1.00 71.08           O
ATOM   1871  ND2 ASN A 233      28.269 -10.547  54.184  1.00 71.08           N
ATOM   1872  C   ASN A 233      28.094  -6.216  54.180  1.00 71.08           C
ATOM   1873  O   ASN A 233      27.015  -5.673  54.409  1.00 71.08           O
ATOM   1874  N   HIS A 234      28.828  -5.930  53.084  1.00151.29           N
ATOM   1875  CA  HIS A 234      28.465  -5.030  52.018  1.00151.29           C
ATOM   1876  ND1 HIS A 234      30.082  -6.614  49.642  1.00151.29           N
ATOM   1877  CG  HIS A 234      30.469  -5.771  50.660  1.00151.29           C
ATOM   1878  CB  HIS A 234      29.661  -4.609  51.150  1.00151.29           C
ATOM   1879  NE2 HIS A 234      32.064  -7.336  50.350  1.00151.29           N
ATOM   1880  CD2 HIS A 234      31.681  -6.226  51.080  1.00151.29           C
ATOM   1881  CE1 HIS A 234      31.072  -7.531  49.498  1.00151.29           C
ATOM   1882  C   HIS A 234      27.446  -5.647  51.100  1.00151.29           C
ATOM   1883  O   HIS A 234      26.822  -4.931  50.315  1.00151.29           O
ATOM   1884  N   SER A 235      27.340  -6.996  51.081  1.00108.35           N
ATOM   1885  CA  SER A 235      26.392  -7.648  50.207  1.00108.35           C
ATOM   1886  CB  SER A 235      27.065  -8.667  49.269  1.00108.35           C
ATOM   1887  OG  SER A 235      28.036  -8.018  48.463  1.00108.35           O
ATOM   1888  C   SER A 235      25.400  -8.440  51.022  1.00108.35           C
ATOM   1889  O   SER A 235      25.123  -9.597  50.708  1.00108.35           O
ATOM   1890  N   HIS A 236      24.779  -7.823  52.045  1.00 71.79           N
ATOM   1891  CA  HIS A 236      23.922  -8.573  52.927  1.00 71.79           C
ATOM   1892  ND1 HIS A 236      23.050  -5.393  53.726  1.00 71.79           N
ATOM   1893  CG  HIS A 236      22.657  -6.666  54.075  1.00 71.79           C
ATOM   1894  CB  HIS A 236      23.585  -7.832  54.236  1.00 71.79           C
ATOM   1895  NE2 HIS A 236      20.844  -5.325  54.008  1.00 71.79           N
ATOM   1896  CD2 HIS A 236      21.307  -6.606  54.243  1.00 71.79           C
ATOM   1897  CE1 HIS A 236      21.926  -4.631  53.701  1.00 71.79           C
ATOM   1898  C   HIS A 236      22.638  -9.020  52.282  1.00 71.79           C
ATOM   1899  O   HIS A 236      22.219 -10.162  52.470  1.00 71.79           O
ATOM   1900  N   ALA A 237      21.964  -8.141  51.514  1.00 41.87           N
ATOM   1901  CA  ALA A 237      20.679  -8.502  50.971  1.00 41.87           C
ATOM   1902  CB  ALA A 237      19.963  -7.337  50.263  1.00 41.87           C
ATOM   1903  C   ALA A 237      20.813  -9.624  49.991  1.00 41.87           C
ATOM   1904  O   ALA A 237      20.026 -10.572  50.010  1.00 41.87           O
ATOM   1905  N   THR A 238      21.827  -9.544  49.111  1.00103.09           N
ATOM   1906  CA  THR A 238      22.032 -10.545  48.107  1.00103.09           C
ATOM   1907  CB  THR A 238      23.131 -10.172  47.154  1.00103.09           C
ATOM   1908  OG1 THR A 238      23.232 -11.136  46.116  1.00103.09           O
ATOM   1909  CG2 THR A 238      24.457 -10.065  47.925  1.00103.09           C
ATOM   1910  C   THR A 238      22.367 -11.844  48.768  1.00103.09           C
ATOM   1911  O   THR A 238      21.840 -12.893  48.400  1.00103.09           O
ATOM   1912  N   GLN A 239      23.236 -11.801  49.793  1.00103.19           N
ATOM   1913  CA  GLN A 239      23.653 -13.004  50.448  1.00103.19           C
ATOM   1914  CB  GLN A 239      24.687 -12.753  51.550  1.00103.19           C
ATOM   1915  CG  GLN A 239      25.130 -14.037  52.246  1.00103.19           C
ATOM   1916  CD  GLN A 239      25.963 -13.634  53.448  1.00103.19           C
ATOM   1917  OE1 GLN A 239      26.101 -12.450  53.749  1.00103.19           O
ATOM   1918  NE2 GLN A 239      26.526 -14.643  54.163  1.00103.19           N
ATOM   1919  C   GLN A 239      22.479 -13.679  51.099  1.00103.19           C
ATOM   1920  O   GLN A 239      22.323 -14.893  50.974  1.00103.19           O
ATOM   1921  N   ASP A 240      21.619 -12.916  51.807  1.00 57.08           N
ATOM   1922  CA  ASP A 240      20.518 -13.521  52.513  1.00 57.08           C
ATOM   1923  CB  ASP A 240      19.753 -12.566  53.436  1.00 57.08           C
ATOM   1924  CG  ASP A 240      18.666 -13.365  54.144  1.00 57.08           C
ATOM   1925  OD1 ASP A 240      18.833 -14.608  54.270  1.00 57.08           O
ATOM   1926  OD2 ASP A 240      17.649 -12.747  54.559  1.00 57.08           O
ATOM   1927  C   ASP A 240      19.518 -14.102  51.558  1.00 57.08           C
ATOM   1928  O   ASP A 240      18.990 -15.185  51.800  1.00 57.08           O
ATOM   1929  N   LEU A 241      19.219 -13.393  50.451  1.00 95.77           N
ATOM   1930  CA  LEU A 241      18.248 -13.851  49.489  1.00 95.77           C
ATOM   1931  CB  LEU A 241      17.996 -12.784  48.394  1.00 95.77           C
ATOM   1932  CG  LEU A 241      16.958 -13.095  47.283  1.00 95.77           C
ATOM   1933  CD1 LEU A 241      16.790 -11.872  46.369  1.00 95.77           C
ATOM   1934  CD2 LEU A 241      17.286 -14.346  46.446  1.00 95.77           C
ATOM   1935  C   LEU A 241      18.770 -15.099  48.852  1.00 95.77           C
ATOM   1936  O   LEU A 241      18.019 -16.030  48.561  1.00 95.77           O
ATOM   1937  N   TYR A 242      20.084 -15.126  48.580  1.00 79.43           N
ATOM   1938  CA  TYR A 242      20.700 -16.248  47.937  1.00 79.43           C
ATOM   1939  CB  TYR A 242      22.184 -15.952  47.675  1.00 79.43           C
ATOM   1940  CG  TYR A 242      22.762 -17.022  46.825  1.00 79.43           C
ATOM   1941  CD1 TYR A 242      22.723 -16.895  45.457  1.00 79.43           C
ATOM   1942  CD2 TYR A 242      23.339 -18.135  47.387  1.00 79.43           C
ATOM   1943  CE1 TYR A 242      23.257 -17.869  44.651  1.00 79.43           C
ATOM   1944  CE2 TYR A 242      23.875 -19.112  46.583  1.00 79.43           C
ATOM   1945  CZ  TYR A 242      23.835 -18.978  45.216  1.00 79.43           C
ATOM   1946  OH  TYR A 242      24.386 -19.981  44.392  1.00 79.43           O
ATOM   1947  C   TYR A 242      20.594 -17.456  48.830  1.00 79.43           C
ATOM   1948  O   TYR A 242      20.232 -18.539  48.370  1.00 79.43           O
ATOM   1949  N   ASP A 243      20.900 -17.301  50.136  1.00 84.50           N
ATOM   1950  CA  ASP A 243      20.890 -18.410  51.056  1.00 84.50           C
ATOM   1951  CB  ASP A 243      21.389 -18.015  52.465  1.00 84.50           C
ATOM   1952  CG  ASP A 243      21.529 -19.261  53.343  1.00 84.50           C
ATOM   1953  OD1 ASP A 243      21.132 -20.370  52.899  1.00 84.50           O
ATOM   1954  OD2 ASP A 243      22.041 -19.113  54.485  1.00 84.50           O
ATOM   1955  C   ASP A 243      19.500 -18.955  51.207  1.00 84.50           C
ATOM   1956  O   ASP A 243      19.294 -20.167  51.166  1.00 84.50           O
ATOM   1957  N   SER A 244      18.498 -18.071  51.354  1.00 43.11           N
ATOM   1958  CA  SER A 244      17.163 -18.529  51.619  1.00 43.11           C
ATOM   1959  CB  SER A 244      16.146 -17.378  51.717  1.00 43.11           C
ATOM   1960  OG  SER A 244      15.989 -16.756  50.450  1.00 43.11           O
ATOM   1961  C   SER A 244      16.707 -19.440  50.522  1.00 43.11           C
ATOM   1962  O   SER A 244      16.067 -20.458  50.780  1.00 43.11           O
ATOM   1963  N   ILE A 245      16.992 -19.091  49.258  1.00112.85           N
ATOM   1964  CA  ILE A 245      16.555 -19.929  48.179  1.00112.85           C
ATOM   1965  CB  ILE A 245      16.629 -19.248  46.848  1.00112.85           C
ATOM   1966  CG1 ILE A 245      15.810 -20.024  45.808  1.00112.85           C
ATOM   1967  CG2 ILE A 245      18.101 -19.053  46.496  1.00112.85           C
ATOM   1968  CD1 ILE A 245      15.555 -19.235  44.527  1.00112.85           C
ATOM   1969  C   ILE A 245      17.321 -21.225  48.170  1.00112.85           C
ATOM   1970  O   ILE A 245      16.752 -22.285  47.914  1.00112.85           O
ATOM   1971  N   ALA A 246      18.644 -21.177  48.433  1.00 30.92           N
ATOM   1972  CA  ALA A 246      19.456 -22.365  48.437  1.00 30.92           C
ATOM   1973  CB  ALA A 246      20.944 -22.064  48.690  1.00 30.92           C
ATOM   1974  C   ALA A 246      18.980 -23.278  49.530  1.00 30.92           C
ATOM   1975  O   ALA A 246      18.938 -24.496  49.361  1.00 30.92           O
ATOM   1976  N   ALA A 247      18.628 -22.691  50.690  1.00 36.12           N
ATOM   1977  CA  ALA A 247      18.162 -23.385  51.860  1.00 36.12           C
ATOM   1978  CB  ALA A 247      17.950 -22.451  53.064  1.00 36.12           C
ATOM   1979  C   ALA A 247      16.855 -24.056  51.572  1.00 36.12           C
ATOM   1980  O   ALA A 247      16.584 -25.138  52.088  1.00 36.12           O
ATOM   1981  N   GLY A 248      15.999 -23.443  50.735  1.00 38.94           N
ATOM   1982  CA  GLY A 248      14.718 -24.040  50.492  1.00 38.94           C
ATOM   1983  C   GLY A 248      13.668 -23.223  51.179  1.00 38.94           C
ATOM   1984  O   GLY A 248      12.517 -23.643  51.288  1.00 38.94           O
ATOM   1985  N   ASN A 249      14.052 -22.043  51.699  1.00 75.97           N
ATOM   1986  CA  ASN A 249      13.093 -21.138  52.265  1.00 75.97           C
ATOM   1987  CB  ASN A 249      13.706 -20.366  53.453  1.00 75.97           C
ATOM   1988  CG  ASN A 249      12.629 -19.686  54.284  1.00 75.97           C
ATOM   1989  OD1 ASN A 249      11.915 -18.806  53.808  1.00 75.97           O
ATOM   1990  ND2 ASN A 249      12.514 -20.101  55.575  1.00 75.97           N
ATOM   1991  C   ASN A 249      12.817 -20.166  51.151  1.00 75.97           C
ATOM   1992  O   ASN A 249      13.350 -19.058  51.137  1.00 75.97           O
ATOM   1993  N   TYR A 250      11.929 -20.544  50.205  1.00 90.32           N
ATOM   1994  CA  TYR A 250      11.748 -19.766  49.006  1.00 90.32           C
ATOM   1995  CB  TYR A 250      11.044 -20.509  47.854  1.00 90.32           C
ATOM   1996  CG  TYR A 250      11.874 -21.689  47.475  1.00 90.32           C
ATOM   1997  CD1 TYR A 250      13.072 -21.526  46.820  1.00 90.32           C
ATOM   1998  CD2 TYR A 250      11.467 -22.961  47.808  1.00 90.32           C
ATOM   1999  CE1 TYR A 250      13.836 -22.617  46.477  1.00 90.32           C
ATOM   2000  CE2 TYR A 250      12.227 -24.055  47.466  1.00 90.32           C
ATOM   2001  CZ  TYR A 250      13.415 -23.884  46.798  1.00 90.32           C
ATOM   2002  OH  TYR A 250      14.197 -25.005  46.447  1.00 90.32           O
ATOM   2003  C   TYR A 250      10.958 -18.524  49.274  1.00 90.32           C
ATOM   2004  O   TYR A 250       9.902 -18.542  49.904  1.00 90.32           O
ATOM   2005  N   PRO A 251      11.475 -17.430  48.773  1.00 81.81           N
ATOM   2006  CA  PRO A 251      10.834 -16.154  48.910  1.00 81.81           C
ATOM   2007  CD  PRO A 251      12.893 -17.315  48.473  1.00 81.81           C
ATOM   2008  CB  PRO A 251      11.826 -15.132  48.356  1.00 81.81           C
ATOM   2009  CG  PRO A 251      13.200 -15.809  48.538  1.00 81.81           C
ATOM   2010  C   PRO A 251       9.547 -16.196  48.147  1.00 81.81           C
ATOM   2011  O   PRO A 251       9.546 -16.696  47.022  1.00 81.81           O
ATOM   2012  N   GLU A 252       8.453 -15.658  48.722  1.00 57.61           N
ATOM   2013  CA  GLU A 252       7.181 -15.714  48.060  1.00 57.61           C
ATOM   2014  CB  GLU A 252       6.274 -16.805  48.672  1.00 57.61           C
ATOM   2015  CG  GLU A 252       6.878 -18.211  48.530  1.00 57.61           C
ATOM   2016  CD  GLU A 252       6.022 -19.242  49.258  1.00 57.61           C
ATOM   2017  OE1 GLU A 252       4.769 -19.115  49.231  1.00 57.61           O
ATOM   2018  OE2 GLU A 252       6.618 -20.184  49.848  1.00 57.61           O
ATOM   2019  C   GLU A 252       6.507 -14.384  48.238  1.00 57.61           C
ATOM   2020  O   GLU A 252       6.659 -13.734  49.271  1.00 57.61           O
ATOM   2021  N   TRP A 253       5.759 -13.933  47.208  1.00 75.29           N
ATOM   2022  CA  TRP A 253       5.052 -12.680  47.271  1.00 75.29           C
ATOM   2023  CB  TRP A 253       5.732 -11.566  46.450  1.00 75.29           C
ATOM   2024  CG  TRP A 253       7.023 -11.009  47.016  1.00 75.29           C
ATOM   2025  CD2 TRP A 253       8.339 -11.556  46.804  1.00 75.29           C
ATOM   2026  CD1 TRP A 253       7.191  -9.899  47.791  1.00 75.29           C
ATOM   2027  NE1 TRP A 253       8.523  -9.713  48.069  1.00 75.29           N
ATOM   2028  CE2 TRP A 253       9.241 -10.724  47.469  1.00 75.29           C
ATOM   2029  CE3 TRP A 253       8.763 -12.654  46.111  1.00 75.29           C
ATOM   2030  CZ2 TRP A 253      10.584 -10.977  47.451  1.00 75.29           C
ATOM   2031  CZ3 TRP A 253      10.118 -12.907  46.098  1.00 75.29           C
ATOM   2032  CH2 TRP A 253      11.013 -12.085  46.754  1.00 75.29           C
ATOM   2033  C   TRP A 253       3.692 -12.880  46.662  1.00 75.29           C
ATOM   2034  O   TRP A 253       3.510 -13.709  45.771  1.00 75.29           O
ATOM   2035  N   LYS A 254       2.690 -12.113  47.143  1.00 53.71           N
ATOM   2036  CA  LYS A 254       1.357 -12.178  46.607  1.00 53.71           C
ATOM   2037  CB  LYS A 254       0.244 -12.070  47.667  1.00 53.71           C
ATOM   2038  CG  LYS A 254       0.191 -13.205  48.690  1.00 53.71           C
ATOM   2039  CD  LYS A 254      -0.713 -12.873  49.881  1.00 53.71           C
ATOM   2040  CE  LYS A 254      -0.797 -13.971  50.943  1.00 53.71           C
ATOM   2041  NZ  LYS A 254      -1.783 -13.592  51.980  1.00 53.71           N
ATOM   2042  C   LYS A 254       1.181 -10.976  45.725  1.00 53.71           C
ATOM   2043  O   LYS A 254       1.653  -9.884  46.041  1.00 53.71           O
ATOM   2044  N   LEU A 255       0.485 -11.148  44.583  1.00 61.13           N
ATOM   2045  CA  LEU A 255       0.277 -10.047  43.682  1.00 61.13           C
ATOM   2046  CB  LEU A 255       0.569 -10.419  42.218  1.00 61.13           C
ATOM   2047  CG  LEU A 255       0.403  -9.261  41.219  1.00 61.13           C
ATOM   2048  CD1 LEU A 255       1.433  -8.147  41.475  1.00 61.13           C
ATOM   2049  CD2 LEU A 255       0.437  -9.779  39.773  1.00 61.13           C
ATOM   2050  C   LEU A 255      -1.156  -9.612  43.784  1.00 61.13           C
ATOM   2051  O   LEU A 255      -2.074 -10.427  43.693  1.00 61.13           O
ATOM   2052  N   PHE A 256      -1.369  -8.290  43.977  1.00129.19           N
ATOM   2053  CA  PHE A 256      -2.678  -7.717  44.127  1.00129.19           C
ATOM   2054  CB  PHE A 256      -2.860  -6.969  45.460  1.00129.19           C
ATOM   2055  CG  PHE A 256      -2.863  -7.949  46.582  1.00129.19           C
ATOM   2056  CD1 PHE A 256      -1.688  -8.335  47.187  1.00129.19           C
ATOM   2057  CD2 PHE A 256      -4.049  -8.487  47.026  1.00129.19           C
ATOM   2058  CE1 PHE A 256      -1.698  -9.237  48.224  1.00129.19           C
ATOM   2059  CE2 PHE A 256      -4.065  -9.390  48.063  1.00129.19           C
ATOM   2060  CZ  PHE A 256      -2.888  -9.768  48.664  1.00129.19           C
ATOM   2061  C   PHE A 256      -2.843  -6.674  43.063  1.00129.19           C
ATOM   2062  O   PHE A 256      -1.864  -6.148  42.533  1.00129.19           O
ATOM   2063  N   ILE A 257      -4.111  -6.363  42.716  1.00 46.95           N
ATOM   2064  CA  ILE A 257      -4.384  -5.380  41.707  1.00 46.95           C
ATOM   2065  CB  ILE A 257      -4.946  -5.970  40.445  1.00 46.95           C
ATOM   2066  CG1 ILE A 257      -3.880  -6.797  39.712  1.00 46.95           C
ATOM   2067  CG2 ILE A 257      -5.571  -4.840  39.619  1.00 46.95           C
ATOM   2068  CD1 ILE A 257      -4.436  -7.593  38.531  1.00 46.95           C
ATOM   2069  C   ILE A 257      -5.396  -4.398  42.213  1.00 46.95           C
ATOM   2070  O   ILE A 257      -6.351  -4.762  42.899  1.00 46.95           O
ATOM   2071  N   GLN A 258      -5.191  -3.102  41.894  1.00 57.54           N
ATOM   2072  CA  GLN A 258      -6.154  -2.090  42.230  1.00 57.54           C
ATOM   2073  CB  GLN A 258      -5.584  -0.884  42.992  1.00 57.54           C
ATOM   2074  CG  GLN A 258      -5.139  -1.213  44.417  1.00 57.54           C
ATOM   2075  CD  GLN A 258      -4.876   0.111  45.114  1.00 57.54           C
ATOM   2076  OE1 GLN A 258      -5.573   1.094  44.871  1.00 57.54           O
ATOM   2077  NE2 GLN A 258      -3.846   0.151  46.000  1.00 57.54           N
ATOM   2078  C   GLN A 258      -6.737  -1.586  40.944  1.00 57.54           C
ATOM   2079  O   GLN A 258      -6.011  -1.296  39.993  1.00 57.54           O
ATOM   2080  N   THR A 259      -8.083  -1.473  40.883  1.00112.42           N
ATOM   2081  CA  THR A 259      -8.716  -1.068  39.658  1.00112.42           C
ATOM   2082  CB  THR A 259      -9.668  -2.089  39.101  1.00112.42           C
ATOM   2083  OG1 THR A 259     -10.729  -2.314  40.017  1.00112.42           O
ATOM   2084  CG2 THR A 259      -8.908  -3.399  38.830  1.00112.42           C
ATOM   2085  C   THR A 259      -9.501   0.193  39.855  1.00112.42           C
ATOM   2086  O   THR A 259     -10.289   0.324  40.793  1.00112.42           O
ATOM   2087  N   ILE A 260      -9.285   1.164  38.942  1.00 94.83           N
ATOM   2088  CA  ILE A 260      -9.994   2.408  38.979  1.00 94.83           C
ATOM   2089  CB  ILE A 260      -9.115   3.582  39.316  1.00 94.83           C
ATOM   2090  CG1 ILE A 260      -8.031   3.790  38.248  1.00 94.83           C
ATOM   2091  CG2 ILE A 260      -8.540   3.343  40.720  1.00 94.83           C
ATOM   2092  CD1 ILE A 260      -7.306   5.131  38.359  1.00 94.83           C
ATOM   2093  C   ILE A 260     -10.574   2.630  37.618  1.00 94.83           C
ATOM   2094  O   ILE A 260      -9.869   2.585  36.610  1.00 94.83           O
ATOM   2095  N   ASP A 261     -11.895   2.880  37.553  1.00 58.46           N
ATOM   2096  CA  ASP A 261     -12.524   3.080  36.280  1.00 58.46           C
ATOM   2097  CB  ASP A 261     -14.059   3.032  36.356  1.00 58.46           C
ATOM   2098  CG  ASP A 261     -14.594   3.068  34.936  1.00 58.46           C
ATOM   2099  OD1 ASP A 261     -14.780   4.195  34.405  1.00 58.46           O
ATOM   2100  OD2 ASP A 261     -14.828   1.969  34.365  1.00 58.46           O
ATOM   2101  C   ASP A 261     -12.100   4.422  35.771  1.00 58.46           C
ATOM   2102  O   ASP A 261     -11.865   5.349  36.543  1.00 58.46           O
ATOM   2103  N   PRO A 262     -11.993   4.539  34.475  1.00 80.44           N
ATOM   2104  CA  PRO A 262     -11.551   5.770  33.874  1.00 80.44           C
ATOM   2105  CD  PRO A 262     -11.708   3.387  33.637  1.00 80.44           C
ATOM   2106  CB  PRO A 262     -11.328   5.449  32.401  1.00 80.44           C
ATOM   2107  CG  PRO A 262     -10.975   3.949  32.407  1.00 80.44           C
ATOM   2108  C   PRO A 262     -12.488   6.914  34.117  1.00 80.44           C
ATOM   2109  O   PRO A 262     -12.049   8.062  34.071  1.00 80.44           O
ATOM   2110  N   ALA A 263     -13.780   6.632  34.348  1.00 56.21           N
ATOM   2111  CA  ALA A 263     -14.766   7.653  34.571  1.00 56.21           C
ATOM   2112  CB  ALA A 263     -16.189   7.090  34.706  1.00 56.21           C
ATOM   2113  C   ALA A 263     -14.465   8.385  35.847  1.00 56.21           C
ATOM   2114  O   ALA A 263     -14.685   9.591  35.941  1.00 56.21           O
ATOM   2115  N   ASP A 264     -13.970   7.642  36.855  1.00 83.33           N
ATOM   2116  CA  ASP A 264     -13.720   8.039  38.220  1.00 83.33           C
ATOM   2117  CB  ASP A 264     -13.460   6.845  39.157  1.00 83.33           C
ATOM   2118  CG  ASP A 264     -14.782   6.135  39.406  1.00 83.33           C
ATOM   2119  OD1 ASP A 264     -15.830   6.662  38.946  1.00 83.33           O
ATOM   2120  OD2 ASP A 264     -14.766   5.058  40.060  1.00 83.33           O
ATOM   2121  C   ASP A 264     -12.565   8.991  38.420  1.00 83.33           C
ATOM   2122  O   ASP A 264     -12.436   9.548  39.506  1.00 83.33           O
ATOM   2123  N   GLU A 265     -11.688   9.207  37.424  1.00 97.26           N
ATOM   2124  CA  GLU A 265     -10.436   9.909  37.607  1.00 97.26           C
ATOM   2125  CB  GLU A 265      -9.669  10.073  36.286  1.00 97.26           C
ATOM   2126  CG  GLU A 265     -10.465  10.842  35.233  1.00 97.26           C
ATOM   2127  CD  GLU A 265      -9.654  10.876  33.948  1.00 97.26           C
ATOM   2128  OE1 GLU A 265      -8.440  10.540  33.999  1.00 97.26           O
ATOM   2129  OE2 GLU A 265     -10.243  11.240  32.896  1.00 97.26           O
ATOM   2130  C   GLU A 265     -10.564  11.276  38.237  1.00 97.26           C
ATOM   2131  O   GLU A 265      -9.684  11.679  39.000  1.00 97.26           O
ATOM   2132  N   ASP A 266     -11.625  12.039  37.925  1.00 64.87           N
ATOM   2133  CA  ASP A 266     -11.844  13.378  38.420  1.00 64.87           C
ATOM   2134  CB  ASP A 266     -13.061  14.060  37.765  1.00 64.87           C
ATOM   2135  CG  ASP A 266     -12.738  14.384  36.315  1.00 64.87           C
ATOM   2136  OD1 ASP A 266     -11.582  14.809  36.049  1.00 64.87           O
ATOM   2137  OD2 ASP A 266     -13.640  14.206  35.453  1.00 64.87           O
ATOM   2138  C   ASP A 266     -12.128  13.388  39.901  1.00 64.87           C
ATOM   2139  O   ASP A 266     -11.940  14.407  40.563  1.00 64.87           O
ATOM   2140  N   LYS A 267     -12.599  12.258  40.454  1.00107.65           N
ATOM   2141  CA  LYS A 267     -13.141  12.157  41.785  1.00107.65           C
ATOM   2142  CB  LYS A 267     -13.742  10.771  42.085  1.00107.65           C
ATOM   2143  CG  LYS A 267     -15.056  10.494  41.344  1.00107.65           C
ATOM   2144  CD  LYS A 267     -15.516   9.038  41.452  1.00107.65           C
ATOM   2145  CE  LYS A 267     -15.374   8.476  42.868  1.00107.65           C
ATOM   2146  NZ  LYS A 267     -15.854   7.078  42.921  1.00107.65           N
ATOM   2147  C   LYS A 267     -12.206  12.511  42.913  1.00107.65           C
ATOM   2148  O   LYS A 267     -12.681  12.923  43.969  1.00107.65           O
ATOM   2149  N   PHE A 268     -10.877  12.358  42.773  1.00 84.82           N
ATOM   2150  CA  PHE A 268     -10.030  12.526  43.926  1.00 84.82           C
ATOM   2151  CB  PHE A 268      -8.876  11.509  43.944  1.00 84.82           C
ATOM   2152  CG  PHE A 268      -9.500  10.157  43.853  1.00 84.82           C
ATOM   2153  CD1 PHE A 268      -9.730   9.587  42.619  1.00 84.82           C
ATOM   2154  CD2 PHE A 268      -9.869   9.466  44.985  1.00 84.82           C
ATOM   2155  CE1 PHE A 268     -10.308   8.344  42.518  1.00 84.82           C
ATOM   2156  CE2 PHE A 268     -10.449   8.223  44.886  1.00 84.82           C
ATOM   2157  CZ  PHE A 268     -10.668   7.658  43.652  1.00 84.82           C
ATOM   2158  C   PHE A 268      -9.424  13.899  43.996  1.00 84.82           C
ATOM   2159  O   PHE A 268      -9.577  14.731  43.103  1.00 84.82           O
ATOM   2160  N   ASP A 269      -8.766  14.167  45.144  1.00 73.54           N
ATOM   2161  CA  ASP A 269      -8.053  15.371  45.460  1.00 73.54           C
ATOM   2162  CB  ASP A 269      -7.661  15.476  46.950  1.00 73.54           C
ATOM   2163  CG  ASP A 269      -6.732  14.329  47.328  1.00 73.54           C
ATOM   2164  OD1 ASP A 269      -6.667  13.336  46.559  1.00 73.54           O
ATOM   2165  OD2 ASP A 269      -6.080  14.428  48.402  1.00 73.54           O
ATOM   2166  C   ASP A 269      -6.805  15.412  44.635  1.00 73.54           C
ATOM   2167  O   ASP A 269      -6.144  16.448  44.547  1.00 73.54           O
ATOM   2168  N   PHE A 270      -6.407  14.252  44.072  1.00 77.38           N
ATOM   2169  CA  PHE A 270      -5.199  14.180  43.301  1.00 77.38           C
ATOM   2170  CB  PHE A 270      -4.128  13.311  43.988  1.00 77.38           C
ATOM   2171  CG  PHE A 270      -4.588  11.888  44.022  1.00 77.38           C
ATOM   2172  CD1 PHE A 270      -5.555  11.459  44.902  1.00 77.38           C
ATOM   2173  CD2 PHE A 270      -4.023  10.961  43.176  1.00 77.38           C
ATOM   2174  CE1 PHE A 270      -5.965  10.145  44.924  1.00 77.38           C
ATOM   2175  CE2 PHE A 270      -4.426   9.647  43.193  1.00 77.38           C
ATOM   2176  CZ  PHE A 270      -5.402   9.234  44.065  1.00 77.38           C
ATOM   2177  C   PHE A 270      -5.499  13.561  41.965  1.00 77.38           C
ATOM   2178  O   PHE A 270      -6.570  12.996  41.750  1.00 77.38           O
ATOM   2179  N   ASP A 271      -4.546  13.695  41.014  1.00105.50           N
ATOM   2180  CA  ASP A 271      -4.645  13.133  39.692  1.00105.50           C
ATOM   2181  CB  ASP A 271      -3.818  13.941  38.670  1.00105.50           C
ATOM   2182  CG  ASP A 271      -4.059  13.415  37.263  1.00105.50           C
ATOM   2183  OD1 ASP A 271      -3.857  12.192  37.045  1.00105.50           O
ATOM   2184  OD2 ASP A 271      -4.431  14.235  36.381  1.00105.50           O
ATOM   2185  C   ASP A 271      -4.081  11.736  39.770  1.00105.50           C
ATOM   2186  O   ASP A 271      -2.891  11.556  40.021  1.00105.50           O
ATOM   2187  N   PRO A 272      -4.897  10.733  39.549  1.00102.26           N
ATOM   2188  CA  PRO A 272      -4.526   9.340  39.675  1.00102.26           C
ATOM   2189  CD  PRO A 272      -6.241  10.917  39.031  1.00102.26           C
ATOM   2190  CB  PRO A 272      -5.812   8.557  39.393  1.00102.26           C
ATOM   2191  CG  PRO A 272      -6.660   9.521  38.540  1.00102.26           C
ATOM   2192  C   PRO A 272      -3.375   8.920  38.791  1.00102.26           C
ATOM   2193  O   PRO A 272      -2.768   7.884  39.069  1.00102.26           O
ATOM   2194  N   LEU A 273      -3.131   9.647  37.684  1.00176.80           N
ATOM   2195  CA  LEU A 273      -2.048   9.473  36.745  1.00176.80           C
ATOM   2196  CB  LEU A 273      -2.267  10.170  35.385  1.00176.80           C
ATOM   2197  CG  LEU A 273      -3.309   9.499  34.462  1.00176.80           C
ATOM   2198  CD1 LEU A 273      -2.872   8.085  34.047  1.00176.80           C
ATOM   2199  CD2 LEU A 273      -4.722   9.534  35.062  1.00176.80           C
ATOM   2200  C   LEU A 273      -0.737   9.980  37.296  1.00176.80           C
ATOM   2201  O   LEU A 273       0.314   9.731  36.705  1.00176.80           O
ATOM   2202  N   ASP A 274      -0.776  10.815  38.357  1.00 89.61           N
ATOM   2203  CA  ASP A 274       0.400  11.418  38.941  1.00 89.61           C
ATOM   2204  CB  ASP A 274       0.023  12.579  39.888  1.00 89.61           C
ATOM   2205  CG  ASP A 274       1.253  13.389  40.267  1.00 89.61           C
ATOM   2206  OD1 ASP A 274       2.372  13.038  39.807  1.00 89.61           O
ATOM   2207  OD2 ASP A 274       1.085  14.379  41.029  1.00 89.61           O
ATOM   2208  C   ASP A 274       1.174  10.385  39.735  1.00 89.61           C
ATOM   2209  O   ASP A 274       0.672   9.803  40.693  1.00 89.61           O
ATOM   2210  N   VAL A 275       2.451  10.157  39.358  1.00141.03           N
ATOM   2211  CA  VAL A 275       3.358   9.189  39.941  1.00141.03           C
ATOM   2212  CB  VAL A 275       4.578   9.002  39.092  1.00141.03           C
ATOM   2213  CG1 VAL A 275       5.178  10.385  38.826  1.00141.03           C
ATOM   2214  CG2 VAL A 275       5.530   8.001  39.771  1.00141.03           C
ATOM   2215  C   VAL A 275       3.748   9.540  41.361  1.00141.03           C
ATOM   2216  O   VAL A 275       4.269   8.706  42.103  1.00141.03           O
ATOM   2217  N   THR A 276       3.609  10.816  41.746  1.00 97.77           N
ATOM   2218  CA  THR A 276       3.863  11.291  43.082  1.00 97.77           C
ATOM   2219  CB  THR A 276       4.024  12.784  43.152  1.00 97.77           C
ATOM   2220  OG1 THR A 276       2.872  13.433  42.636  1.00 97.77           O
ATOM   2221  CG2 THR A 276       5.273  13.181  42.346  1.00 97.77           C
ATOM   2222  C   THR A 276       2.747  10.865  44.008  1.00 97.77           C
ATOM   2223  O   THR A 276       2.828  11.085  45.219  1.00 97.77           O
ATOM   2224  N   LYS A 277       1.637  10.324  43.453  1.00147.81           N
ATOM   2225  CA  LYS A 277       0.468   9.994  44.233  1.00147.81           C
ATOM   2226  CB  LYS A 277      -0.821  10.501  43.558  1.00147.81           C
ATOM   2227  CG  LYS A 277      -0.869  12.024  43.401  1.00147.81           C
ATOM   2228  CD  LYS A 277      -0.849  12.771  44.737  1.00147.81           C
ATOM   2229  CE  LYS A 277      -0.747  14.291  44.604  1.00147.81           C
ATOM   2230  NZ  LYS A 277       0.658  14.687  44.361  1.00147.81           N
ATOM   2231  C   LYS A 277       0.305   8.507  44.437  1.00147.81           C
ATOM   2232  O   LYS A 277       0.643   7.694  43.577  1.00147.81           O
ATOM   2233  N   THR A 278      -0.259   8.120  45.607  1.00123.45           N
ATOM   2234  CA  THR A 278      -0.487   6.733  45.914  1.00123.45           C
ATOM   2235  CB  THR A 278       0.124   6.296  47.215  1.00123.45           C
ATOM   2236  OG1 THR A 278      -0.089   4.905  47.411  1.00123.45           O
ATOM   2237  CG2 THR A 278      -0.494   7.105  48.367  1.00123.45           C
ATOM   2238  C   THR A 278      -1.965   6.487  45.967  1.00123.45           C
ATOM   2239  O   THR A 278      -2.751   7.426  46.078  1.00123.45           O
ATOM   2240  N   TRP A 279      -2.380   5.207  45.819  1.00 84.79           N
ATOM   2241  CA  TRP A 279      -3.768   4.837  45.889  1.00 84.79           C
ATOM   2242  CB  TRP A 279      -4.224   3.934  44.718  1.00 84.79           C
ATOM   2243  CG  TRP A 279      -4.200   4.560  43.336  1.00 84.79           C
ATOM   2244  CD2 TRP A 279      -4.590   3.872  42.132  1.00 84.79           C
ATOM   2245  CD1 TRP A 279      -3.828   5.816  42.956  1.00 84.79           C
ATOM   2246  NE1 TRP A 279      -3.961   5.956  41.594  1.00 84.79           N
ATOM   2247  CE2 TRP A 279      -4.429   4.768  41.073  1.00 84.79           C
ATOM   2248  CE3 TRP A 279      -5.044   2.601  41.922  1.00 84.79           C
ATOM   2249  CZ2 TRP A 279      -4.721   4.403  39.788  1.00 84.79           C
ATOM   2250  CZ3 TRP A 279      -5.338   2.238  40.625  1.00 84.79           C
ATOM   2251  CH2 TRP A 279      -5.180   3.122  39.578  1.00 84.79           C
ATOM   2252  C   TRP A 279      -3.893   4.018  47.134  1.00 84.79           C
ATOM   2253  O   TRP A 279      -3.571   2.831  47.147  1.00 84.79           O
ATOM   2254  N   PRO A 280      -4.372   4.631  48.178  1.00 96.65           N
ATOM   2255  CA  PRO A 280      -4.504   3.990  49.457  1.00 96.65           C
ATOM   2256  CD  PRO A 280      -5.180   5.832  48.074  1.00 96.65           C
ATOM   2257  CB  PRO A 280      -5.134   5.036  50.370  1.00 96.65           C
ATOM   2258  CG  PRO A 280      -5.970   5.883  49.393  1.00 96.65           C
ATOM   2259  C   PRO A 280      -5.379   2.789  49.322  1.00 96.65           C
ATOM   2260  O   PRO A 280      -6.321   2.815  48.534  1.00 96.65           O
ATOM   2261  N   GLU A 281      -5.086   1.733  50.099  1.00 33.52           N
ATOM   2262  CA  GLU A 281      -5.859   0.531  50.056  1.00 33.52           C
ATOM   2263  CB  GLU A 281      -5.309  -0.557  50.993  1.00 33.52           C
ATOM   2264  CG  GLU A 281      -5.927  -1.938  50.770  1.00 33.52           C
ATOM   2265  CD  GLU A 281      -5.158  -2.934  51.625  1.00 33.52           C
ATOM   2266  OE1 GLU A 281      -4.319  -2.482  52.450  1.00 33.52           O
ATOM   2267  OE2 GLU A 281      -5.398  -4.161  51.465  1.00 33.52           O
ATOM   2268  C   GLU A 281      -7.239   0.894  50.501  1.00 33.52           C
ATOM   2269  O   GLU A 281      -8.224   0.338  50.018  1.00 33.52           O
ATOM   2270  N   ASP A 282      -7.337   1.857  51.439  1.00 38.38           N
ATOM   2271  CA  ASP A 282      -8.616   2.267  51.944  1.00 38.38           C
ATOM   2272  CB  ASP A 282      -8.533   3.413  52.966  1.00 38.38           C
ATOM   2273  CG  ASP A 282      -8.061   2.849  54.298  1.00 38.38           C
ATOM   2274  OD1 ASP A 282      -8.292   1.634  54.536  1.00 38.38           O
ATOM   2275  OD2 ASP A 282      -7.473   3.626  55.097  1.00 38.38           O
ATOM   2276  C   ASP A 282      -9.444   2.778  50.809  1.00 38.38           C
ATOM   2277  O   ASP A 282     -10.616   2.423  50.686  1.00 38.38           O
ATOM   2278  N   ILE A 283      -8.864   3.647  49.959  1.00173.17           N
ATOM   2279  CA  ILE A 283      -9.620   4.184  48.864  1.00173.17           C
ATOM   2280  CB  ILE A 283      -8.924   5.314  48.154  1.00173.17           C
ATOM   2281  CG1 ILE A 283      -8.895   6.579  49.031  1.00173.17           C
ATOM   2282  CG2 ILE A 283      -9.620   5.525  46.797  1.00173.17           C
ATOM   2283  CD1 ILE A 283     -10.281   7.163  49.301  1.00173.17           C
ATOM   2284  C   ILE A 283      -9.909   3.131  47.838  1.00173.17           C
ATOM   2285  O   ILE A 283     -11.050   2.998  47.398  1.00173.17           O
ATOM   2286  N   LEU A 284      -8.889   2.349  47.421  1.00141.49           N
ATOM   2287  CA  LEU A 284      -9.156   1.385  46.387  1.00141.49           C
ATOM   2288  CB  LEU A 284      -8.515   1.802  45.048  1.00141.49           C
ATOM   2289  CG  LEU A 284      -9.048   1.057  43.811  1.00141.49           C
ATOM   2290  CD1 LEU A 284      -8.782  -0.451  43.889  1.00141.49           C
ATOM   2291  CD2 LEU A 284     -10.520   1.411  43.545  1.00141.49           C
ATOM   2292  C   LEU A 284      -8.578   0.064  46.826  1.00141.49           C
ATOM   2293  O   LEU A 284      -7.369  -0.082  47.003  1.00141.49           O
ATOM   2294  N   PRO A 285      -9.433  -0.915  46.968  1.00 66.85           N
ATOM   2295  CA  PRO A 285      -9.012  -2.187  47.499  1.00 66.85           C
ATOM   2296  CD  PRO A 285     -10.804  -0.610  47.344  1.00 66.85           C
ATOM   2297  CB  PRO A 285     -10.289  -2.913  47.913  1.00 66.85           C
ATOM   2298  CG  PRO A 285     -11.262  -1.769  48.244  1.00 66.85           C
ATOM   2299  C   PRO A 285      -8.140  -2.999  46.601  1.00 66.85           C
ATOM   2300  O   PRO A 285      -8.173  -2.816  45.385  1.00 66.85           O
ATOM   2301  N   LEU A 286      -7.336  -3.901  47.200  1.00 91.67           N
ATOM   2302  CA  LEU A 286      -6.490  -4.764  46.436  1.00 91.67           C
ATOM   2303  CB  LEU A 286      -5.132  -5.067  47.089  1.00 91.67           C
ATOM   2304  CG  LEU A 286      -4.146  -3.891  46.978  1.00 91.67           C
ATOM   2305  CD1 LEU A 286      -3.737  -3.667  45.513  1.00 91.67           C
ATOM   2306  CD2 LEU A 286      -4.702  -2.618  47.636  1.00 91.67           C
ATOM   2307  C   LEU A 286      -7.218  -6.046  46.220  1.00 91.67           C
ATOM   2308  O   LEU A 286      -7.970  -6.503  47.078  1.00 91.67           O
ATOM   2309  N   GLN A 287      -7.040  -6.634  45.023  1.00 49.51           N
ATOM   2310  CA  GLN A 287      -7.682  -7.877  44.715  1.00 49.51           C
ATOM   2311  CB  GLN A 287      -8.610  -7.766  43.497  1.00 49.51           C
ATOM   2312  CG  GLN A 287      -9.686  -6.690  43.674  1.00 49.51           C
ATOM   2313  CD  GLN A 287     -10.537  -6.646  42.414  1.00 49.51           C
ATOM   2314  OE1 GLN A 287     -11.195  -7.622  42.058  1.00 49.51           O
ATOM   2315  NE2 GLN A 287     -10.523  -5.481  41.713  1.00 49.51           N
ATOM   2316  C   GLN A 287      -6.586  -8.845  44.379  1.00 49.51           C
ATOM   2317  O   GLN A 287      -5.707  -8.530  43.580  1.00 49.51           O
ATOM   2318  N   PRO A 288      -6.598 -10.011  44.976  1.00179.60           N
ATOM   2319  CA  PRO A 288      -5.530 -10.952  44.734  1.00179.60           C
ATOM   2320  CD  PRO A 288      -7.121 -10.135  46.327  1.00179.60           C
ATOM   2321  CB  PRO A 288      -5.620 -11.989  45.850  1.00179.60           C
ATOM   2322  CG  PRO A 288      -6.255 -11.207  47.012  1.00179.60           C
ATOM   2323  C   PRO A 288      -5.491 -11.560  43.362  1.00179.60           C
ATOM   2324  O   PRO A 288      -6.524 -12.052  42.913  1.00179.60           O
ATOM   2325  N   VAL A 289      -4.340 -11.440  42.654  1.00 83.06           N
ATOM   2326  CA  VAL A 289      -4.065 -12.066  41.384  1.00 83.06           C
ATOM   2327  CB  VAL A 289      -3.093 -11.260  40.566  1.00 83.06           C
ATOM   2328  CG1 VAL A 289      -2.798 -11.999  39.248  1.00 83.06           C
ATOM   2329  CG2 VAL A 289      -3.676  -9.849  40.375  1.00 83.06           C
ATOM   2330  C   VAL A 289      -3.495 -13.458  41.515  1.00 83.06           C
ATOM   2331  O   VAL A 289      -3.989 -14.412  40.914  1.00 83.06           O
ATOM   2332  N   GLY A 290      -2.431 -13.606  42.341  1.00 32.51           N
ATOM   2333  CA  GLY A 290      -1.726 -14.858  42.437  1.00 32.51           C
ATOM   2334  C   GLY A 290      -0.474 -14.643  43.242  1.00 32.51           C
ATOM   2335  O   GLY A 290      -0.324 -13.616  43.904  1.00 32.51           O
ATOM   2336  N   ARG A 291       0.462 -15.624  43.204  1.00 85.60           N
ATOM   2337  CA  ARG A 291       1.646 -15.541  44.018  1.00 85.60           C
ATOM   2338  CB  ARG A 291       1.620 -16.521  45.198  1.00 85.60           C
ATOM   2339  CG  ARG A 291       1.513 -17.971  44.725  1.00 85.60           C
ATOM   2340  CD  ARG A 291       1.577 -19.011  45.841  1.00 85.60           C
ATOM   2341  NE  ARG A 291       0.416 -18.780  46.743  1.00 85.60           N
ATOM   2342  CZ  ARG A 291       0.575 -18.019  47.864  1.00 85.60           C
ATOM   2343  NH1 ARG A 291       1.797 -17.486  48.154  1.00 85.60           N
ATOM   2344  NH2 ARG A 291      -0.482 -17.799  48.699  1.00 85.60           N
ATOM   2345  C   ARG A 291       2.869 -15.904  43.225  1.00 85.60           C
ATOM   2346  O   ARG A 291       2.828 -16.723  42.310  1.00 85.60           O
ATOM   2347  N   LEU A 292       4.019 -15.299  43.585  1.00 43.41           N
ATOM   2348  CA  LEU A 292       5.254 -15.598  42.922  1.00 43.41           C
ATOM   2349  CB  LEU A 292       6.002 -14.344  42.427  1.00 43.41           C
ATOM   2350  CG  LEU A 292       7.329 -14.654  41.706  1.00 43.41           C
ATOM   2351  CD1 LEU A 292       7.076 -15.382  40.375  1.00 43.41           C
ATOM   2352  CD2 LEU A 292       8.196 -13.393  41.545  1.00 43.41           C
ATOM   2353  C   LEU A 292       6.143 -16.279  43.918  1.00 43.41           C
ATOM   2354  O   LEU A 292       6.217 -15.872  45.077  1.00 43.41           O
ATOM   2355  N   VAL A 293       6.812 -17.369  43.487  1.00103.61           N
ATOM   2356  CA  VAL A 293       7.752 -18.054  44.328  1.00103.61           C
ATOM   2357  CB  VAL A 293       7.361 -19.469  44.651  1.00103.61           C
ATOM   2358  CG1 VAL A 293       7.259 -20.270  43.341  1.00103.61           C
ATOM   2359  CG2 VAL A 293       8.396 -20.041  45.636  1.00103.61           C
ATOM   2360  C   VAL A 293       9.060 -18.104  43.594  1.00103.61           C
ATOM   2361  O   VAL A 293       9.103 -18.463  42.418  1.00103.61           O
ATOM   2362  N   LEU A 294      10.168 -17.720  44.267  1.00119.33           N
ATOM   2363  CA  LEU A 294      11.476 -17.785  43.661  1.00119.33           C
ATOM   2364  CB  LEU A 294      12.354 -16.552  43.945  1.00119.33           C
ATOM   2365  CG  LEU A 294      11.851 -15.258  43.272  1.00119.33           C
ATOM   2366  CD1 LEU A 294      10.468 -14.845  43.800  1.00119.33           C
ATOM   2367  CD2 LEU A 294      12.884 -14.129  43.396  1.00119.33           C
ATOM   2368  C   LEU A 294      12.181 -18.992  44.225  1.00119.33           C
ATOM   2369  O   LEU A 294      12.661 -18.983  45.358  1.00119.33           O
ATOM   2370  N   ASN A 295      12.161 -20.086  43.434  1.00176.32           N
ATOM   2371  CA  ASN A 295      12.699 -21.403  43.682  1.00176.32           C
ATOM   2372  CB  ASN A 295      11.942 -22.496  42.913  1.00176.32           C
ATOM   2373  CG  ASN A 295      10.663 -22.806  43.660  1.00176.32           C
ATOM   2374  OD1 ASN A 295      10.694 -23.054  44.864  1.00176.32           O
ATOM   2375  ND2 ASN A 295       9.509 -22.797  42.940  1.00176.32           N
ATOM   2376  C   ASN A 295      14.138 -21.626  43.341  1.00176.32           C
ATOM   2377  O   ASN A 295      14.749 -22.541  43.893  1.00176.32           O
ATOM   2378  N   LYS A 296      14.719 -20.905  42.366  1.00 95.28           N
ATOM   2379  CA  LYS A 296      16.041 -21.352  42.039  1.00 95.28           C
ATOM   2380  CB  LYS A 296      16.065 -22.293  40.824  1.00 95.28           C
ATOM   2381  CG  LYS A 296      17.435 -22.898  40.521  1.00 95.28           C
ATOM   2382  CD  LYS A 296      17.373 -24.106  39.585  1.00 95.28           C
ATOM   2383  CE  LYS A 296      18.731 -24.499  39.002  1.00 95.28           C
ATOM   2384  NZ  LYS A 296      19.077 -23.589  37.890  1.00 95.28           N
ATOM   2385  C   LYS A 296      16.958 -20.206  41.775  1.00 95.28           C
ATOM   2386  O   LYS A 296      16.593 -19.208  41.155  1.00 95.28           O
ATOM   2387  N   ASN A 297      18.209 -20.352  42.249  1.00 72.46           N
ATOM   2388  CA  ASN A 297      19.209 -19.349  42.059  1.00 72.46           C
ATOM   2389  CB  ASN A 297      20.478 -19.542  42.912  1.00 72.46           C
ATOM   2390  CG  ASN A 297      20.213 -19.101  44.341  1.00 72.46           C
ATOM   2391  OD1 ASN A 297      19.746 -17.989  44.583  1.00 72.46           O
ATOM   2392  ND2 ASN A 297      20.535 -19.994  45.314  1.00 72.46           N
ATOM   2393  C   ASN A 297      19.673 -19.405  40.641  1.00 72.46           C
ATOM   2394  O   ASN A 297      19.409 -20.351  39.901  1.00 72.46           O
ATOM   2395  N   ILE A 298      20.375 -18.333  40.240  1.00166.88           N
ATOM   2396  CA  ILE A 298      20.975 -18.137  38.957  1.00166.88           C
ATOM   2397  CB  ILE A 298      21.560 -16.754  38.906  1.00166.88           C
ATOM   2398  CG1 ILE A 298      21.961 -16.295  37.501  1.00166.88           C
ATOM   2399  CG2 ILE A 298      22.708 -16.725  39.928  1.00166.88           C
ATOM   2400  CD1 ILE A 298      22.204 -14.784  37.458  1.00166.88           C
ATOM   2401  C   ILE A 298      22.099 -19.124  38.825  1.00166.88           C
ATOM   2402  O   ILE A 298      22.725 -19.494  39.819  1.00166.88           O
ATOM   2403  N   ASP A 299      22.273 -19.684  37.607  1.00 55.24           N
ATOM   2404  CA  ASP A 299      23.404 -20.517  37.291  1.00 55.24           C
ATOM   2405  CB  ASP A 299      23.235 -21.276  35.965  1.00 55.24           C
ATOM   2406  CG  ASP A 299      22.213 -22.384  36.173  1.00 55.24           C
ATOM   2407  OD1 ASP A 299      22.021 -22.798  37.347  1.00 55.24           O
ATOM   2408  OD2 ASP A 299      21.615 -22.835  35.159  1.00 55.24           O
ATOM   2409  C   ASP A 299      24.612 -19.639  37.143  1.00 55.24           C
ATOM   2410  O   ASP A 299      25.707 -19.990  37.583  1.00 55.24           O
ATOM   2411  N   ASN A 300      24.431 -18.468  36.490  1.00 68.17           N
ATOM   2412  CA  ASN A 300      25.522 -17.567  36.235  1.00 68.17           C
ATOM   2413  CB  ASN A 300      26.070 -17.728  34.807  1.00 68.17           C
ATOM   2414  CG  ASN A 300      27.321 -16.882  34.670  1.00 68.17           C
ATOM   2415  OD1 ASN A 300      27.318 -15.847  34.006  1.00 68.17           O
ATOM   2416  ND2 ASN A 300      28.422 -17.330  35.328  1.00 68.17           N
ATOM   2417  C   ASN A 300      25.005 -16.163  36.356  1.00 68.17           C
ATOM   2418  O   ASN A 300      24.038 -15.791  35.696  1.00 68.17           O
ATOM   2419  N   PHE A 301      25.672 -15.345  37.193  1.00 66.02           N
ATOM   2420  CA  PHE A 301      25.288 -13.995  37.508  1.00 66.02           C
ATOM   2421  CB  PHE A 301      26.241 -13.415  38.571  1.00 66.02           C
ATOM   2422  CG  PHE A 301      25.894 -11.998  38.865  1.00 66.02           C
ATOM   2423  CD1 PHE A 301      24.949 -11.689  39.815  1.00 66.02           C
ATOM   2424  CD2 PHE A 301      26.530 -10.979  38.195  1.00 66.02           C
ATOM   2425  CE1 PHE A 301      24.639 -10.378  40.088  1.00 66.02           C
ATOM   2426  CE2 PHE A 301      26.223  -9.667  38.464  1.00 66.02           C
ATOM   2427  CZ  PHE A 301      25.272  -9.366  39.408  1.00 66.02           C
ATOM   2428  C   PHE A 301      25.345 -13.093  36.307  1.00 66.02           C
ATOM   2429  O   PHE A 301      24.368 -12.423  35.977  1.00 66.02           O
ATOM   2430  N   PHE A 302      26.486 -13.079  35.597  1.00 71.42           N
ATOM   2431  CA  PHE A 302      26.671 -12.147  34.522  1.00 71.42           C
ATOM   2432  CB  PHE A 302      28.082 -12.228  33.909  1.00 71.42           C
ATOM   2433  CG  PHE A 302      28.191 -11.226  32.808  1.00 71.42           C
ATOM   2434  CD1 PHE A 302      28.593  -9.939  33.076  1.00 71.42           C
ATOM   2435  CD2 PHE A 302      27.891 -11.572  31.508  1.00 71.42           C
ATOM   2436  CE1 PHE A 302      28.700  -9.010  32.065  1.00 71.42           C
ATOM   2437  CE2 PHE A 302      27.997 -10.648  30.496  1.00 71.42           C
ATOM   2438  CZ  PHE A 302      28.400  -9.365  30.773  1.00 71.42           C
ATOM   2439  C   PHE A 302      25.673 -12.401  33.443  1.00 71.42           C
ATOM   2440  O   PHE A 302      25.029 -11.474  32.954  1.00 71.42           O
ATOM   2441  N   ALA A 303      25.521 -13.675  33.044  1.00 67.91           N
ATOM   2442  CA  ALA A 303      24.641 -14.018  31.968  1.00 67.91           C
ATOM   2443  CB  ALA A 303      24.749 -15.500  31.569  1.00 67.91           C
ATOM   2444  C   ALA A 303      23.211 -13.750  32.326  1.00 67.91           C
ATOM   2445  O   ALA A 303      22.445 -13.314  31.469  1.00 67.91           O
ATOM   2446  N   GLU A 304      22.770 -14.135  33.545  1.00 96.01           N
ATOM   2447  CA  GLU A 304      21.396 -13.900  33.900  1.00 96.01           C
ATOM   2448  CB  GLU A 304      20.852 -14.980  34.849  1.00 96.01           C
ATOM   2449  CG  GLU A 304      20.844 -16.369  34.205  1.00 96.01           C
ATOM   2450  CD  GLU A 304      20.033 -17.308  35.085  1.00 96.01           C
ATOM   2451  OE1 GLU A 304      18.877 -16.937  35.425  1.00 96.01           O
ATOM   2452  OE2 GLU A 304      20.549 -18.406  35.425  1.00 96.01           O
ATOM   2453  C   GLU A 304      21.092 -12.549  34.502  1.00 96.01           C
ATOM   2454  O   GLU A 304      20.397 -11.729  33.906  1.00 96.01           O
ATOM   2455  N   ASN A 305      21.662 -12.265  35.695  1.00106.43           N
ATOM   2456  CA  ASN A 305      21.346 -11.081  36.456  1.00106.43           C
ATOM   2457  CB  ASN A 305      21.987 -11.113  37.860  1.00106.43           C
ATOM   2458  CG  ASN A 305      21.796  -9.770  38.548  1.00106.43           C
ATOM   2459  OD1 ASN A 305      22.659  -8.898  38.460  1.00106.43           O
ATOM   2460  ND2 ASN A 305      20.646  -9.588  39.248  1.00106.43           N
ATOM   2461  C   ASN A 305      21.825  -9.842  35.767  1.00106.43           C
ATOM   2462  O   ASN A 305      21.088  -8.864  35.647  1.00106.43           O
ATOM   2463  N   GLU A 306      23.089  -9.842  35.310  1.00101.03           N
ATOM   2464  CA  GLU A 306      23.645  -8.656  34.729  1.00101.03           C
ATOM   2465  CB  GLU A 306      25.172  -8.719  34.569  1.00101.03           C
ATOM   2466  CG  GLU A 306      25.788  -7.370  34.191  1.00101.03           C
ATOM   2467  CD  GLU A 306      25.710  -6.454  35.406  1.00101.03           C
ATOM   2468  OE1 GLU A 306      25.221  -6.920  36.470  1.00101.03           O
ATOM   2469  OE2 GLU A 306      26.137  -5.275  35.287  1.00101.03           O
ATOM   2470  C   GLU A 306      23.043  -8.358  33.383  1.00101.03           C
ATOM   2471  O   GLU A 306      22.780  -7.204  33.051  1.00101.03           O
ATOM   2472  N   GLN A 307      22.845  -9.410  32.570  1.00116.51           N
ATOM   2473  CA  GLN A 307      22.397  -9.382  31.198  1.00116.51           C
ATOM   2474  CB  GLN A 307      22.678 -10.700  30.458  1.00116.51           C
ATOM   2475  CG  GLN A 307      24.158 -10.885  30.131  1.00116.51           C
ATOM   2476  CD  GLN A 307      24.520  -9.780  29.148  1.00116.51           C
ATOM   2477  OE1 GLN A 307      23.668  -8.984  28.757  1.00116.51           O
ATOM   2478  NE2 GLN A 307      25.815  -9.719  28.737  1.00116.51           N
ATOM   2479  C   GLN A 307      20.943  -9.062  30.987  1.00116.51           C
ATOM   2480  O   GLN A 307      20.571  -8.595  29.913  1.00116.51           O
ATOM   2481  N   LEU A 308      20.059  -9.367  31.952  1.00124.37           N
ATOM   2482  CA  LEU A 308      18.650  -9.203  31.716  1.00124.37           C
ATOM   2483  CB  LEU A 308      17.808  -9.842  32.842  1.00124.37           C
ATOM   2484  CG  LEU A 308      16.310 -10.080  32.539  1.00124.37           C
ATOM   2485  CD1 LEU A 308      15.505  -8.784  32.381  1.00124.37           C
ATOM   2486  CD2 LEU A 308      16.137 -11.042  31.352  1.00124.37           C
ATOM   2487  C   LEU A 308      18.317  -7.738  31.594  1.00124.37           C
ATOM   2488  O   LEU A 308      18.961  -6.877  32.194  1.00124.37           O
ATOM   2489  N   ALA A 309      17.323  -7.426  30.730  1.00 53.97           N
ATOM   2490  CA  ALA A 309      16.803  -6.095  30.578  1.00 53.97           C
ATOM   2491  CB  ALA A 309      16.990  -5.540  29.159  1.00 53.97           C
ATOM   2492  C   ALA A 309      15.315  -6.159  30.770  1.00 53.97           C
ATOM   2493  O   ALA A 309      14.662  -7.072  30.268  1.00 53.97           O
ATOM   2494  N   PHE A 310      14.732  -5.174  31.489  1.00 76.23           N
ATOM   2495  CA  PHE A 310      13.307  -5.137  31.704  1.00 76.23           C
ATOM   2496  CB  PHE A 310      12.919  -5.178  33.196  1.00 76.23           C
ATOM   2497  CG  PHE A 310      13.461  -6.400  33.865  1.00 76.23           C
ATOM   2498  CD1 PHE A 310      12.765  -7.587  33.863  1.00 76.23           C
ATOM   2499  CD2 PHE A 310      14.674  -6.349  34.513  1.00 76.23           C
ATOM   2500  CE1 PHE A 310      13.273  -8.700  34.495  1.00 76.23           C
ATOM   2501  CE2 PHE A 310      15.188  -7.457  35.147  1.00 76.23           C
ATOM   2502  CZ  PHE A 310      14.487  -8.638  35.139  1.00 76.23           C
ATOM   2503  C   PHE A 310      12.810  -3.796  31.223  1.00 76.23           C
ATOM   2504  O   PHE A 310      13.580  -2.838  31.159  1.00 76.23           O
ATOM   2505  N   CYS A 311      11.513  -3.708  30.832  1.00132.92           N
ATOM   2506  CA  CYS A 311      10.893  -2.450  30.479  1.00132.92           C
ATOM   2507  CB  CYS A 311      11.053  -2.030  29.005  1.00132.92           C
ATOM   2508  SG  CYS A 311      10.251  -3.141  27.828  1.00132.92           S
ATOM   2509  C   CYS A 311       9.431  -2.513  30.856  1.00132.92           C
ATOM   2510  O   CYS A 311       8.737  -3.455  30.484  1.00132.92           O
ATOM   2511  N   PRO A 312       8.932  -1.532  31.584  1.00183.41           N
ATOM   2512  CA  PRO A 312       7.554  -1.522  32.042  1.00183.41           C
ATOM   2513  CD  PRO A 312       9.780  -0.677  32.398  1.00183.41           C
ATOM   2514  CB  PRO A 312       7.434  -0.307  32.958  1.00183.41           C
ATOM   2515  CG  PRO A 312       8.861  -0.111  33.497  1.00183.41           C
ATOM   2516  C   PRO A 312       6.595  -1.469  30.899  1.00183.41           C
ATOM   2517  O   PRO A 312       5.418  -1.790  31.049  1.00183.41           O
ATOM   2518  N   ALA A 313       7.096  -0.950  29.782  1.00116.11           N
ATOM   2519  CA  ALA A 313       6.519  -0.778  28.492  1.00116.11           C
ATOM   2520  CB  ALA A 313       7.469   0.007  27.599  1.00116.11           C
ATOM   2521  C   ALA A 313       6.370  -2.083  27.798  1.00116.11           C
ATOM   2522  O   ALA A 313       5.732  -2.115  26.746  1.00116.11           O
ATOM   2523  N   ILE A 314       7.119  -3.126  28.231  1.00166.85           N
ATOM   2524  CA  ILE A 314       6.930  -4.367  27.538  1.00166.85           C
ATOM   2525  CB  ILE A 314       8.114  -5.296  27.421  1.00166.85           C
ATOM   2526  CG1 ILE A 314       7.798  -6.348  26.343  1.00166.85           C
ATOM   2527  CG2 ILE A 314       8.499  -5.887  28.788  1.00166.85           C
ATOM   2528  CD1 ILE A 314       7.637  -5.747  24.944  1.00166.85           C
ATOM   2529  C   ILE A 314       5.778  -5.066  28.185  1.00166.85           C
ATOM   2530  O   ILE A 314       5.837  -5.584  29.301  1.00166.85           O
ATOM   2531  N   VAL A 315       4.666  -5.077  27.438  1.00 65.88           N
ATOM   2532  CA  VAL A 315       3.396  -5.519  27.918  1.00 65.88           C
ATOM   2533  CB  VAL A 315       2.455  -4.352  27.955  1.00 65.88           C
ATOM   2534  CG1 VAL A 315       1.036  -4.866  28.163  1.00 65.88           C
ATOM   2535  CG2 VAL A 315       2.930  -3.354  29.026  1.00 65.88           C
ATOM   2536  C   VAL A 315       2.828  -6.517  26.953  1.00 65.88           C
ATOM   2537  O   VAL A 315       3.163  -6.497  25.771  1.00 65.88           O
ATOM   2538  N   VAL A 316       1.970  -7.438  27.452  1.00 65.52           N
ATOM   2539  CA  VAL A 316       1.327  -8.422  26.626  1.00 65.52           C
ATOM   2540  CB  VAL A 316       1.160  -9.755  27.294  1.00 65.52           C
ATOM   2541  CG1 VAL A 316       2.557 -10.323  27.596  1.00 65.52           C
ATOM   2542  CG2 VAL A 316       0.273  -9.584  28.538  1.00 65.52           C
ATOM   2543  C   VAL A 316      -0.035  -7.909  26.254  1.00 65.52           C
ATOM   2544  O   VAL A 316      -0.538  -6.960  26.856  1.00 65.52           O
ATOM   2545  N   PRO A 317      -0.668  -8.512  25.278  1.00 87.38           N
ATOM   2546  CA  PRO A 317      -1.948  -8.026  24.844  1.00 87.38           C
ATOM   2547  CD  PRO A 317       0.006  -9.293  24.257  1.00 87.38           C
ATOM   2548  CB  PRO A 317      -2.324  -8.885  23.639  1.00 87.38           C
ATOM   2549  CG  PRO A 317      -0.956  -9.288  23.052  1.00 87.38           C
ATOM   2550  C   PRO A 317      -2.904  -8.090  25.991  1.00 87.38           C
ATOM   2551  O   PRO A 317      -2.906  -9.082  26.721  1.00 87.38           O
ATOM   2552  N   GLY A 318      -3.744  -7.050  26.146  1.00 34.90           N
ATOM   2553  CA  GLY A 318      -4.634  -6.972  27.263  1.00 34.90           C
ATOM   2554  C   GLY A 318      -4.097  -5.943  28.201  1.00 34.90           C
ATOM   2555  O   GLY A 318      -4.776  -5.547  29.146  1.00 34.90           O
ATOM   2556  N   VAL A 319      -2.849  -5.494  27.975  1.00156.27           N
ATOM   2557  CA  VAL A 319      -2.320  -4.464  28.818  1.00156.27           C
ATOM   2558  CB  VAL A 319      -1.545  -4.976  30.006  1.00156.27           C
ATOM   2559  CG1 VAL A 319      -0.954  -6.359  29.687  1.00156.27           C
ATOM   2560  CG2 VAL A 319      -0.546  -3.895  30.451  1.00156.27           C
ATOM   2561  C   VAL A 319      -1.674  -3.379  28.010  1.00156.27           C
ATOM   2562  O   VAL A 319      -1.085  -3.612  26.955  1.00156.27           O
ATOM   2563  N   TYR A 320      -1.856  -2.129  28.491  1.00177.35           N
ATOM   2564  CA  TYR A 320      -1.451  -0.930  27.807  1.00177.35           C
ATOM   2565  CB  TYR A 320      -2.699  -0.346  27.112  1.00177.35           C
ATOM   2566  CG  TYR A 320      -2.514   1.017  26.552  1.00177.35           C
ATOM   2567  CD1 TYR A 320      -1.780   1.239  25.410  1.00177.35           C
ATOM   2568  CD2 TYR A 320      -3.139   2.075  27.168  1.00177.35           C
ATOM   2569  CE1 TYR A 320      -1.649   2.516  24.912  1.00177.35           C
ATOM   2570  CE2 TYR A 320      -3.012   3.349  26.676  1.00177.35           C
ATOM   2571  CZ  TYR A 320      -2.264   3.571  25.548  1.00177.35           C
ATOM   2572  OH  TYR A 320      -2.138   4.884  25.047  1.00177.35           O
ATOM   2573  C   TYR A 320      -0.894   0.012  28.835  1.00177.35           C
ATOM   2574  O   TYR A 320      -1.192  -0.100  30.022  1.00177.35           O
ATOM   2575  N   TYR A 321      -0.041   0.969  28.422  1.00178.03           N
ATOM   2576  CA  TYR A 321       0.542   1.830  29.411  1.00178.03           C
ATOM   2577  CB  TYR A 321       1.970   2.252  29.054  1.00178.03           C
ATOM   2578  CG  TYR A 321       1.857   3.403  28.157  1.00178.03           C
ATOM   2579  CD1 TYR A 321       1.143   3.326  26.990  1.00178.03           C
ATOM   2580  CD2 TYR A 321       2.428   4.580  28.549  1.00178.03           C
ATOM   2581  CE1 TYR A 321       1.047   4.438  26.194  1.00178.03           C
ATOM   2582  CE2 TYR A 321       2.331   5.678  27.751  1.00178.03           C
ATOM   2583  CZ  TYR A 321       1.650   5.611  26.571  1.00178.03           C
ATOM   2584  OH  TYR A 321       1.567   6.759  25.763  1.00178.03           O
ATOM   2585  C   TYR A 321      -0.365   3.013  29.602  1.00178.03           C
ATOM   2586  O   TYR A 321      -1.167   3.340  28.728  1.00178.03           O
ATOM   2587  N   SER A 322      -0.344   3.608  30.813  1.00129.80           N
ATOM   2588  CA  SER A 322      -1.133   4.779  31.099  1.00129.80           C
ATOM   2589  CB  SER A 322      -1.223   5.151  32.582  1.00129.80           C
ATOM   2590  OG  SER A 322      -1.892   4.146  33.309  1.00129.80           O
ATOM   2591  C   SER A 322      -0.446   5.983  30.550  1.00129.80           C
ATOM   2592  O   SER A 322       0.725   5.956  30.187  1.00129.80           O
ATOM   2593  N   ASP A 323      -1.198   7.097  30.551  1.00 81.71           N
ATOM   2594  CA  ASP A 323      -0.809   8.414  30.130  1.00 81.71           C
ATOM   2595  CB  ASP A 323      -1.995   9.392  30.088  1.00 81.71           C
ATOM   2596  CG  ASP A 323      -2.844   9.011  28.884  1.00 81.71           C
ATOM   2597  OD1 ASP A 323      -2.330   8.234  28.036  1.00 81.71           O
ATOM   2598  OD2 ASP A 323      -4.007   9.487  28.789  1.00 81.71           O
ATOM   2599  C   ASP A 323       0.226   8.970  31.073  1.00 81.71           C
ATOM   2600  O   ASP A 323       0.842   9.984  30.748  1.00 81.71           O
ATOM   2601  N   ASP A 324       0.400   8.359  32.274  1.00 88.74           N
ATOM   2602  CA  ASP A 324       1.324   8.797  33.305  1.00 88.74           C
ATOM   2603  CB  ASP A 324       1.649   7.653  34.292  1.00 88.74           C
ATOM   2604  CG  ASP A 324       2.544   8.142  35.426  1.00 88.74           C
ATOM   2605  OD1 ASP A 324       3.630   8.716  35.143  1.00 88.74           O
ATOM   2606  OD2 ASP A 324       2.148   7.940  36.604  1.00 88.74           O
ATOM   2607  C   ASP A 324       2.607   9.260  32.661  1.00 88.74           C
ATOM   2608  O   ASP A 324       3.285   8.512  31.964  1.00 88.74           O
ATOM   2609  N   LYS A 325       2.946  10.551  32.876  1.00 91.83           N
ATOM   2610  CA  LYS A 325       4.040  11.225  32.220  1.00 91.83           C
ATOM   2611  CB  LYS A 325       4.039  12.737  32.445  1.00 91.83           C
ATOM   2612  CG  LYS A 325       2.908  13.390  31.661  1.00 91.83           C
ATOM   2613  CD  LYS A 325       2.834  14.898  31.842  1.00 91.83           C
ATOM   2614  CE  LYS A 325       1.684  15.514  31.059  1.00 91.83           C
ATOM   2615  NZ  LYS A 325       1.979  16.933  30.810  1.00 91.83           N
ATOM   2616  C   LYS A 325       5.382  10.691  32.603  1.00 91.83           C
ATOM   2617  O   LYS A 325       6.339  10.810  31.839  1.00 91.83           O
ATOM   2618  N   LEU A 326       5.535  10.208  33.841  1.00 71.04           N
ATOM   2619  CA  LEU A 326       6.790   9.631  34.215  1.00 71.04           C
ATOM   2620  CB  LEU A 326       6.832   9.356  35.729  1.00 71.04           C
ATOM   2621  CG  LEU A 326       8.152   8.773  36.257  1.00 71.04           C
ATOM   2622  CD1 LEU A 326       9.308   9.771  36.087  1.00 71.04           C
ATOM   2623  CD2 LEU A 326       8.001   8.286  37.708  1.00 71.04           C
ATOM   2624  C   LEU A 326       6.953   8.321  33.478  1.00 71.04           C
ATOM   2625  O   LEU A 326       8.008   8.024  32.919  1.00 71.04           O
ATOM   2626  N   LEU A 327       5.867   7.522  33.421  1.00136.98           N
ATOM   2627  CA  LEU A 327       5.827   6.194  32.860  1.00136.98           C
ATOM   2628  CB  LEU A 327       4.394   5.625  32.936  1.00136.98           C
ATOM   2629  CG  LEU A 327       4.207   4.109  32.707  1.00136.98           C
ATOM   2630  CD1 LEU A 327       4.926   3.591  31.453  1.00136.98           C
ATOM   2631  CD2 LEU A 327       4.515   3.305  33.974  1.00136.98           C
ATOM   2632  C   LEU A 327       6.159   6.267  31.393  1.00136.98           C
ATOM   2633  O   LEU A 327       6.891   5.433  30.859  1.00136.98           O
ATOM   2634  N   GLN A 328       5.647   7.305  30.713  1.00 96.62           N
ATOM   2635  CA  GLN A 328       5.755   7.468  29.289  1.00 96.62           C
ATOM   2636  CB  GLN A 328       5.173   8.807  28.803  1.00 96.62           C
ATOM   2637  CG  GLN A 328       3.667   8.999  28.977  1.00 96.62           C
ATOM   2638  CD  GLN A 328       2.977   8.525  27.708  1.00 96.62           C
ATOM   2639  OE1 GLN A 328       1.751   8.552  27.614  1.00 96.62           O
ATOM   2640  NE2 GLN A 328       3.766   8.036  26.713  1.00 96.62           N
ATOM   2641  C   GLN A 328       7.192   7.503  28.851  1.00 96.62           C
ATOM   2642  O   GLN A 328       7.525   6.992  27.787  1.00 96.62           O
ATOM   2643  N   THR A 329       8.076   8.165  29.614  1.00111.13           N
ATOM   2644  CA  THR A 329       9.465   8.272  29.253  1.00111.13           C
ATOM   2645  CB  THR A 329      10.207   9.255  30.113  1.00111.13           C
ATOM   2646  OG1 THR A 329      11.510   9.479  29.595  1.00111.13           O
ATOM   2647  CG2 THR A 329      10.288   8.708  31.547  1.00111.13           C
ATOM   2648  C   THR A 329      10.133   6.937  29.397  1.00111.13           C
ATOM   2649  O   THR A 329      11.016   6.576  28.620  1.00111.13           O
ATOM   2650  N   ARG A 330       9.726   6.162  30.416  1.00112.21           N
ATOM   2651  CA  ARG A 330      10.329   4.896  30.690  1.00112.21           C
ATOM   2652  CB  ARG A 330       9.813   4.225  31.977  1.00112.21           C
ATOM   2653  CG  ARG A 330      10.347   4.891  33.247  1.00112.21           C
ATOM   2654  CD  ARG A 330       9.645   4.434  34.527  1.00112.21           C
ATOM   2655  NE  ARG A 330      10.399   3.286  35.104  1.00112.21           N
ATOM   2656  CZ  ARG A 330       9.699   2.231  35.612  1.00112.21           C
ATOM   2657  NH1 ARG A 330       8.344   2.190  35.458  1.00112.21           N
ATOM   2658  NH2 ARG A 330      10.342   1.223  36.271  1.00112.21           N
ATOM   2659  C   ARG A 330      10.119   3.956  29.541  1.00112.21           C
ATOM   2660  O   ARG A 330      11.001   3.147  29.254  1.00112.21           O
ATOM   2661  N   ILE A 331       8.976   4.067  28.827  1.00109.88           N
ATOM   2662  CA  ILE A 331       8.652   3.152  27.759  1.00109.88           C
ATOM   2663  CB  ILE A 331       7.381   3.550  27.010  1.00109.88           C
ATOM   2664  CG1 ILE A 331       6.866   2.432  26.101  1.00109.88           C
ATOM   2665  CG2 ILE A 331       7.615   4.811  26.173  1.00109.88           C
ATOM   2666  CD1 ILE A 331       5.430   2.645  25.634  1.00109.88           C
ATOM   2667  C   ILE A 331       9.809   3.125  26.802  1.00109.88           C
ATOM   2668  O   ILE A 331      10.212   2.059  26.339  1.00109.88           O
ATOM   2669  N   PHE A 332      10.354   4.309  26.474  1.00 89.86           N
ATOM   2670  CA  PHE A 332      11.471   4.498  25.592  1.00 89.86           C
ATOM   2671  CB  PHE A 332      11.522   5.960  25.111  1.00 89.86           C
ATOM   2672  CG  PHE A 332      12.808   6.222  24.415  1.00 89.86           C
ATOM   2673  CD1 PHE A 332      13.035   5.762  23.140  1.00 89.86           C
ATOM   2674  CD2 PHE A 332      13.779   6.967  25.042  1.00 89.86           C
ATOM   2675  CE1 PHE A 332      14.230   6.021  22.512  1.00 89.86           C
ATOM   2676  CE2 PHE A 332      14.974   7.231  24.420  1.00 89.86           C
ATOM   2677  CZ  PHE A 332      15.201   6.757  23.151  1.00 89.86           C
ATOM   2678  C   PHE A 332      12.798   4.148  26.200  1.00 89.86           C
ATOM   2679  O   PHE A 332      13.601   3.435  25.599  1.00 89.86           O
ATOM   2680  N   SER A 333      13.028   4.619  27.440  1.00 67.97           N
ATOM   2681  CA  SER A 333      14.318   4.616  28.076  1.00 67.97           C
ATOM   2682  CB  SER A 333      14.271   5.251  29.476  1.00 67.97           C
ATOM   2683  OG  SER A 333      15.522   5.093  30.129  1.00 67.97           O
ATOM   2684  C   SER A 333      14.925   3.255  28.254  1.00 67.97           C
ATOM   2685  O   SER A 333      16.092   3.066  27.912  1.00 67.97           O
ATOM   2686  N   TYR A 334      14.171   2.276  28.794  1.00 88.87           N
ATOM   2687  CA  TYR A 334      14.769   1.013  29.154  1.00 88.87           C
ATOM   2688  CB  TYR A 334      13.792   0.010  29.783  1.00 88.87           C
ATOM   2689  CG  TYR A 334      13.493   0.469  31.159  1.00 88.87           C
ATOM   2690  CD1 TYR A 334      14.318   0.100  32.196  1.00 88.87           C
ATOM   2691  CD2 TYR A 334      12.400   1.265  31.406  1.00 88.87           C
ATOM   2692  CE1 TYR A 334      14.051   0.518  33.475  1.00 88.87           C
ATOM   2693  CE2 TYR A 334      12.131   1.685  32.686  1.00 88.87           C
ATOM   2694  CZ  TYR A 334      12.957   1.309  33.717  1.00 88.87           C
ATOM   2695  OH  TYR A 334      12.684   1.736  35.030  1.00 88.87           O
ATOM   2696  C   TYR A 334      15.346   0.287  27.987  1.00 88.87           C
ATOM   2697  O   TYR A 334      16.514  -0.098  28.006  1.00 88.87           O
ATOM   2698  N   ALA A 335      14.538   0.086  26.938  1.00 47.42           N
ATOM   2699  CA  ALA A 335      14.977  -0.658  25.797  1.00 47.42           C
ATOM   2700  CB  ALA A 335      13.859  -0.874  24.765  1.00 47.42           C
ATOM   2701  C   ALA A 335      16.086   0.093  25.133  1.00 47.42           C
ATOM   2702  O   ALA A 335      17.008  -0.505  24.579  1.00 47.42           O
ATOM   2703  N   ASP A 336      15.992   1.437  25.148  1.00 67.66           N
ATOM   2704  CA  ASP A 336      16.965   2.278  24.511  1.00 67.66           C
ATOM   2705  CB  ASP A 336      16.622   3.775  24.614  1.00 67.66           C
ATOM   2706  CG  ASP A 336      17.708   4.561  23.890  1.00 67.66           C
ATOM   2707  OD1 ASP A 336      18.118   4.130  22.780  1.00 67.66           O
ATOM   2708  OD2 ASP A 336      18.160   5.595  24.450  1.00 67.66           O
ATOM   2709  C   ASP A 336      18.302   2.093  25.154  1.00 67.66           C
ATOM   2710  O   ASP A 336      19.303   1.956  24.454  1.00 67.66           O
ATOM   2711  N   THR A 337      18.351   2.090  26.501  1.00116.49           N
ATOM   2712  CA  THR A 337      19.590   1.952  27.221  1.00116.49           C
ATOM   2713  CB  THR A 337      19.463   2.234  28.692  1.00116.49           C
ATOM   2714  OG1 THR A 337      20.752   2.325  29.282  1.00116.49           O
ATOM   2715  CG2 THR A 337      18.644   1.121  29.363  1.00116.49           C
ATOM   2716  C   THR A 337      20.143   0.570  27.035  1.00116.49           C
ATOM   2717  O   THR A 337      21.356   0.370  27.026  1.00116.49           O
ATOM   2718  N   GLN A 338      19.257  -0.432  26.909  1.00144.03           N
ATOM   2719  CA  GLN A 338      19.643  -1.809  26.769  1.00144.03           C
ATOM   2720  CB  GLN A 338      18.435  -2.744  26.849  1.00144.03           C
ATOM   2721  CG  GLN A 338      17.719  -2.565  28.179  1.00144.03           C
ATOM   2722  CD  GLN A 338      18.786  -2.707  29.248  1.00144.03           C
ATOM   2723  OE1 GLN A 338      18.979  -3.787  29.796  1.00144.03           O
ATOM   2724  NE2 GLN A 338      19.518  -1.600  29.562  1.00144.03           N
ATOM   2725  C   GLN A 338      20.351  -2.042  25.474  1.00144.03           C
ATOM   2726  O   GLN A 338      21.261  -2.866  25.389  1.00144.03           O
ATOM   2727  N   ARG A 339      19.935  -1.338  24.413  1.00127.76           N
ATOM   2728  CA  ARG A 339      20.555  -1.542  23.145  1.00127.76           C
ATOM   2729  CB  ARG A 339      19.816  -0.776  22.035  1.00127.76           C
ATOM   2730  CG  ARG A 339      18.351  -1.242  21.983  1.00127.76           C
ATOM   2731  CD  ARG A 339      17.494  -0.652  20.862  1.00127.76           C
ATOM   2732  NE  ARG A 339      16.088  -1.113  21.077  1.00127.76           N
ATOM   2733  CZ  ARG A 339      15.166  -0.275  21.637  1.00127.76           C
ATOM   2734  NH1 ARG A 339      15.513   1.007  21.949  1.00127.76           N
ATOM   2735  NH2 ARG A 339      13.890  -0.706  21.865  1.00127.76           N
ATOM   2736  C   ARG A 339      21.999  -1.152  23.273  1.00127.76           C
ATOM   2737  O   ARG A 339      22.858  -1.730  22.607  1.00127.76           O
ATOM   2738  N   HIS A 340      22.299  -0.096  24.058  1.00 88.39           N
ATOM   2739  CA  HIS A 340      23.669   0.246  24.347  1.00 88.39           C
ATOM   2740  ND1 HIS A 340      26.402   1.738  24.746  1.00 88.39           N
ATOM   2741  CG  HIS A 340      25.244   1.825  25.487  1.00 88.39           C
ATOM   2742  CB  HIS A 340      23.856   1.651  24.940  1.00 88.39           C
ATOM   2743  NE2 HIS A 340      27.021   2.105  26.850  1.00 88.39           N
ATOM   2744  CD2 HIS A 340      25.641   2.052  26.768  1.00 88.39           C
ATOM   2745  CE1 HIS A 340      27.433   1.910  25.611  1.00 88.39           C
ATOM   2746  C   HIS A 340      24.315  -0.697  25.326  1.00 88.39           C
ATOM   2747  O   HIS A 340      25.378  -1.255  25.057  1.00 88.39           O
ATOM   2748  N   ARG A 341      23.679  -0.895  26.502  1.00186.10           N
ATOM   2749  CA  ARG A 341      24.286  -1.653  27.566  1.00186.10           C
ATOM   2750  CB  ARG A 341      23.403  -1.727  28.822  1.00186.10           C
ATOM   2751  CG  ARG A 341      23.208  -0.411  29.571  1.00186.10           C
ATOM   2752  CD  ARG A 341      22.532  -0.627  30.925  1.00186.10           C
ATOM   2753  NE  ARG A 341      23.294  -1.713  31.606  1.00186.10           N
ATOM   2754  CZ  ARG A 341      22.672  -2.858  32.013  1.00186.10           C
ATOM   2755  NH1 ARG A 341      21.323  -3.001  31.865  1.00186.10           N
ATOM   2756  NH2 ARG A 341      23.403  -3.866  32.574  1.00186.10           N
ATOM   2757  C   ARG A 341      24.531  -3.086  27.175  1.00186.10           C
ATOM   2758  O   ARG A 341      25.650  -3.580  27.312  1.00186.10           O
ATOM   2759  N   LEU A 342      23.464  -3.817  26.780  1.00130.10           N
ATOM   2760  CA  LEU A 342      23.565  -5.202  26.382  1.00130.10           C
ATOM   2761  CB  LEU A 342      22.230  -5.969  26.378  1.00130.10           C
ATOM   2762  CG  LEU A 342      21.492  -6.095  27.717  1.00130.10           C
ATOM   2763  CD1 LEU A 342      21.005  -4.727  28.205  1.00130.10           C
ATOM   2764  CD2 LEU A 342      20.354  -7.123  27.609  1.00130.10           C
ATOM   2765  C   LEU A 342      24.018  -5.363  24.963  1.00130.10           C
ATOM   2766  O   LEU A 342      24.879  -6.190  24.664  1.00130.10           O
ATOM   2767  N   GLY A 343      23.389  -4.597  24.041  1.00 43.52           N
ATOM   2768  CA  GLY A 343      23.672  -4.725  22.634  1.00 43.52           C
ATOM   2769  C   GLY A 343      22.387  -4.675  21.840  1.00 43.52           C
ATOM   2770  O   GLY A 343      21.291  -4.826  22.379  1.00 43.52           O
ATOM   2771  N   PRO A 344      22.515  -4.484  20.542  1.00101.78           N
ATOM   2772  CA  PRO A 344      21.380  -4.376  19.658  1.00101.78           C
ATOM   2773  CD  PRO A 344      23.688  -3.810  20.009  1.00101.78           C
ATOM   2774  CB  PRO A 344      21.949  -3.928  18.313  1.00101.78           C
ATOM   2775  CG  PRO A 344      23.223  -3.153  18.698  1.00101.78           C
ATOM   2776  C   PRO A 344      20.540  -5.617  19.588  1.00101.78           C
ATOM   2777  O   PRO A 344      19.337  -5.497  19.353  1.00101.78           O
ATOM   2778  N   ASN A 345      21.133  -6.815  19.752  1.00164.80           N
ATOM   2779  CA  ASN A 345      20.326  -7.998  19.713  1.00164.80           C
ATOM   2780  CB  ASN A 345      20.941  -9.077  18.808  1.00164.80           C
ATOM   2781  CG  ASN A 345      19.850 -10.071  18.460  1.00164.80           C
ATOM   2782  OD1 ASN A 345      18.897 -10.252  19.215  1.00164.80           O
ATOM   2783  ND2 ASN A 345      19.986 -10.730  17.278  1.00164.80           N
ATOM   2784  C   ASN A 345      20.232  -8.548  21.114  1.00164.80           C
ATOM   2785  O   ASN A 345      20.296  -9.756  21.330  1.00164.80           O
ATOM   2786  N   TYR A 346      19.982  -7.673  22.107  1.00200.58           N
ATOM   2787  CA  TYR A 346      19.957  -8.104  23.479  1.00200.58           C
ATOM   2788  CB  TYR A 346      19.984  -6.976  24.544  1.00200.58           C
ATOM   2789  CG  TYR A 346      18.773  -6.103  24.630  1.00200.58           C
ATOM   2790  CD1 TYR A 346      18.696  -4.946  23.890  1.00200.58           C
ATOM   2791  CD2 TYR A 346      17.735  -6.413  25.483  1.00200.58           C
ATOM   2792  CE1 TYR A 346      17.600  -4.123  23.984  1.00200.58           C
ATOM   2793  CE2 TYR A 346      16.634  -5.592  25.582  1.00200.58           C
ATOM   2794  CZ  TYR A 346      16.567  -4.445  24.830  1.00200.58           C
ATOM   2795  OH  TYR A 346      15.445  -3.596  24.928  1.00200.58           O
ATOM   2796  C   TYR A 346      18.831  -9.062  23.712  1.00200.58           C
ATOM   2797  O   TYR A 346      18.906  -9.931  24.580  1.00200.58           O
ATOM   2798  N   LEU A 347      17.739  -8.914  22.949  1.00105.69           N
ATOM   2799  CA  LEU A 347      16.572  -9.739  23.082  1.00105.69           C
ATOM   2800  CB  LEU A 347      15.339  -9.134  22.395  1.00105.69           C
ATOM   2801  CG  LEU A 347      14.979  -7.818  23.120  1.00105.69           C
ATOM   2802  CD1 LEU A 347      13.621  -7.246  22.686  1.00105.69           C
ATOM   2803  CD2 LEU A 347      15.112  -7.989  24.644  1.00105.69           C
ATOM   2804  C   LEU A 347      16.836 -11.180  22.700  1.00105.69           C
ATOM   2805  O   LEU A 347      16.024 -12.056  22.997  1.00105.69           O
ATOM   2806  N   GLN A 348      17.920 -11.455  21.942  1.00143.45           N
ATOM   2807  CA  GLN A 348      18.298 -12.797  21.554  1.00143.45           C
ATOM   2808  CB  GLN A 348      19.394 -12.863  20.490  1.00143.45           C
ATOM   2809  CG  GLN A 348      20.755 -12.442  21.034  1.00143.45           C
ATOM   2810  CD  GLN A 348      21.764 -12.591  19.915  1.00143.45           C
ATOM   2811  OE1 GLN A 348      22.966 -12.453  20.126  1.00143.45           O
ATOM   2812  NE2 GLN A 348      21.266 -12.887  18.685  1.00143.45           N
ATOM   2813  C   GLN A 348      18.856 -13.601  22.709  1.00143.45           C
ATOM   2814  O   GLN A 348      18.839 -14.831  22.668  1.00143.45           O
ATOM   2815  N   LEU A 349      19.453 -12.943  23.727  1.00 71.78           N
ATOM   2816  CA  LEU A 349      20.124 -13.634  24.807  1.00 71.78           C
ATOM   2817  CB  LEU A 349      20.793 -12.667  25.800  1.00 71.78           C
ATOM   2818  CG  LEU A 349      21.853 -11.762  25.143  1.00 71.78           C
ATOM   2819  CD1 LEU A 349      22.510 -10.825  26.170  1.00 71.78           C
ATOM   2820  CD2 LEU A 349      22.872 -12.586  24.341  1.00 71.78           C
ATOM   2821  C   LEU A 349      19.148 -14.483  25.577  1.00 71.78           C
ATOM   2822  O   LEU A 349      18.004 -14.095  25.796  1.00 71.78           O
ATOM   2823  N   PRO A 350      19.588 -15.627  26.048  1.00 76.11           N
ATOM   2824  CA  PRO A 350      18.741 -16.600  26.693  1.00 76.11           C
ATOM   2825  CD  PRO A 350      20.937 -16.119  25.822  1.00 76.11           C
ATOM   2826  CB  PRO A 350      19.675 -17.711  27.168  1.00 76.11           C
ATOM   2827  CG  PRO A 350      20.887 -17.607  26.224  1.00 76.11           C
ATOM   2828  C   PRO A 350      17.908 -16.048  27.807  1.00 76.11           C
ATOM   2829  O   PRO A 350      16.758 -16.465  27.950  1.00 76.11           O
ATOM   2830  N   VAL A 351      18.462 -15.134  28.618  1.00111.88           N
ATOM   2831  CA  VAL A 351      17.755 -14.580  29.735  1.00111.88           C
ATOM   2832  CB  VAL A 351      18.638 -13.697  30.565  1.00111.88           C
ATOM   2833  CG1 VAL A 351      19.735 -14.569  31.201  1.00111.88           C
ATOM   2834  CG2 VAL A 351      19.193 -12.586  29.657  1.00111.88           C
ATOM   2835  C   VAL A 351      16.592 -13.759  29.258  1.00111.88           C
ATOM   2836  O   VAL A 351      15.568 -13.682  29.935  1.00111.88           O
ATOM   2837  N   ASN A 352      16.775 -13.035  28.137  1.00 89.51           N
ATOM   2838  CA  ASN A 352      15.788 -12.170  27.546  1.00 89.51           C
ATOM   2839  CB  ASN A 352      16.423 -11.019  26.752  1.00 89.51           C
ATOM   2840  CG  ASN A 352      17.010 -10.069  27.788  1.00 89.51           C
ATOM   2841  OD1 ASN A 352      16.307  -9.601  28.683  1.00 89.51           O
ATOM   2842  ND2 ASN A 352      18.336  -9.789  27.680  1.00 89.51           N
ATOM   2843  C   ASN A 352      14.782 -12.866  26.667  1.00 89.51           C
ATOM   2844  O   ASN A 352      13.672 -12.365  26.495  1.00 89.51           O
ATOM   2845  N   ALA A 353      15.139 -14.014  26.056  1.00 53.91           N
ATOM   2846  CA  ALA A 353      14.299 -14.654  25.068  1.00 53.91           C
ATOM   2847  CB  ALA A 353      14.881 -15.980  24.551  1.00 53.91           C
ATOM   2848  C   ALA A 353      12.928 -14.957  25.612  1.00 53.91           C
ATOM   2849  O   ALA A 353      12.762 -15.362  26.760  1.00 53.91           O
ATOM   2850  N   PRO A 354      11.931 -14.755  24.777  1.00156.40           N
ATOM   2851  CA  PRO A 354      10.550 -15.010  25.112  1.00156.40           C
ATOM   2852  CD  PRO A 354      12.066 -13.891  23.618  1.00156.40           C
ATOM   2853  CB  PRO A 354       9.717 -14.241  24.085  1.00156.40           C
ATOM   2854  CG  PRO A 354      10.695 -13.965  22.929  1.00156.40           C
ATOM   2855  C   PRO A 354      10.276 -16.480  25.070  1.00156.40           C
ATOM   2856  O   PRO A 354      11.044 -17.204  24.439  1.00156.40           O
ATOM   2857  N   LYS A 355       9.233 -16.950  25.787  1.00 61.67           N
ATOM   2858  CA  LYS A 355       8.828 -18.326  25.711  1.00 61.67           C
ATOM   2859  CB  LYS A 355       7.793 -18.725  26.790  1.00 61.67           C
ATOM   2860  CG  LYS A 355       7.380 -20.206  26.733  1.00 61.67           C
ATOM   2861  CD  LYS A 355       6.651 -20.733  27.980  1.00 61.67           C
ATOM   2862  CE  LYS A 355       6.199 -22.198  27.866  1.00 61.67           C
ATOM   2863  NZ  LYS A 355       7.285 -23.120  28.279  1.00 61.67           N
ATOM   2864  C   LYS A 355       8.207 -18.532  24.361  1.00 61.67           C
ATOM   2865  O   LYS A 355       8.419 -19.554  23.710  1.00 61.67           O
ATOM   2866  N   CYS A 356       7.420 -17.530  23.916  1.00 86.81           N
ATOM   2867  CA  CYS A 356       6.716 -17.573  22.665  1.00 86.81           C
ATOM   2868  CB  CYS A 356       5.576 -16.548  22.584  1.00 86.81           C
ATOM   2869  SG  CYS A 356       6.152 -14.878  22.982  1.00 86.81           S
ATOM   2870  C   CYS A 356       7.671 -17.333  21.541  1.00 86.81           C
ATOM   2871  O   CYS A 356       8.677 -16.643  21.696  1.00 86.81           O
ATOM   2872  N   ALA A 357       7.349 -17.906  20.364  1.00 47.05           N
ATOM   2873  CA  ALA A 357       8.188 -17.846  19.202  1.00 47.05           C
ATOM   2874  CB  ALA A 357       7.610 -18.604  17.997  1.00 47.05           C
ATOM   2875  C   ALA A 357       8.341 -16.434  18.746  1.00 47.05           C
ATOM   2876  O   ALA A 357       7.440 -15.606  18.877  1.00 47.05           O
ATOM   2877  N   HIS A 358       9.532 -16.137  18.192  1.00136.98           N
ATOM   2878  CA  HIS A 358       9.822 -14.852  17.641  1.00136.98           C
ATOM   2879  ND1 HIS A 358      12.376 -16.319  19.200  1.00136.98           N
ATOM   2880  CG  HIS A 358      12.337 -15.222  18.359  1.00136.98           C
ATOM   2881  CB  HIS A 358      11.153 -14.275  18.212  1.00136.98           C
ATOM   2882  NE2 HIS A 358      14.392 -16.173  18.270  1.00136.98           N
ATOM   2883  CD2 HIS A 358      13.580 -15.153  17.799  1.00136.98           C
ATOM   2884  CE1 HIS A 358      13.626 -16.847  19.108  1.00136.98           C
ATOM   2885  C   HIS A 358       9.930 -15.034  16.149  1.00136.98           C
ATOM   2886  O   HIS A 358      10.875 -15.657  15.675  1.00136.98           O
ATOM   2887  N   HIS A 359       8.929 -14.552  15.368  1.00134.19           N
ATOM   2888  CA  HIS A 359       9.001 -14.623  13.929  1.00134.19           C
ATOM   2889  ND1 HIS A 359       9.159 -17.347  11.584  1.00134.19           N
ATOM   2890  CG  HIS A 359       8.796 -17.028  12.877  1.00134.19           C
ATOM   2891  CB  HIS A 359       8.120 -15.714  13.250  1.00134.19           C
ATOM   2892  NE2 HIS A 359       9.749 -19.082  12.841  1.00134.19           N
ATOM   2893  CD2 HIS A 359       9.165 -18.103  13.632  1.00134.19           C
ATOM   2894  CE1 HIS A 359       9.720 -18.583  11.619  1.00134.19           C
ATOM   2895  C   HIS A 359       8.671 -13.284  13.339  1.00134.19           C
ATOM   2896  O   HIS A 359       7.541 -12.806  13.424  1.00134.19           O
ATOM   2897  N   ASN A 360       9.681 -12.630  12.721  1.00118.74           N
ATOM   2898  CA  ASN A 360       9.445 -11.364  12.080  1.00118.74           C
ATOM   2899  CB  ASN A 360       9.137 -10.179  13.024  1.00118.74           C
ATOM   2900  CG  ASN A 360      10.328  -9.794  13.878  1.00118.74           C
ATOM   2901  OD1 ASN A 360      11.340 -10.488  13.928  1.00118.74           O
ATOM   2902  ND2 ASN A 360      10.206  -8.631  14.566  1.00118.74           N
ATOM   2903  C   ASN A 360      10.515 -11.045  11.067  1.00118.74           C
ATOM   2904  O   ASN A 360      11.315 -11.908  10.703  1.00118.74           O
ATOM   2905  N   ASN A 361      10.535  -9.787  10.561  1.00139.80           N
ATOM   2906  CA  ASN A 361      11.376  -9.462   9.432  1.00139.80           C
ATOM   2907  CB  ASN A 361      10.649  -8.538   8.453  1.00139.80           C
ATOM   2908  CG  ASN A 361       9.198  -8.982   8.428  1.00139.80           C
ATOM   2909  OD1 ASN A 361       8.885 -10.166   8.318  1.00139.80           O
ATOM   2910  ND2 ASN A 361       8.281  -7.992   8.591  1.00139.80           N
ATOM   2911  C   ASN A 361      12.571  -8.652   9.845  1.00139.80           C
ATOM   2912  O   ASN A 361      13.206  -8.041   8.986  1.00139.80           O
ATOM   2913  N   HIS A 362      12.935  -8.607  11.141  1.00105.03           N
ATOM   2914  CA  HIS A 362      14.091  -7.822  11.486  1.00105.03           C
ATOM   2915  ND1 HIS A 362      11.992  -6.499  14.063  1.00105.03           N
ATOM   2916  CG  HIS A 362      13.026  -6.304  13.178  1.00105.03           C
ATOM   2917  CB  HIS A 362      14.114  -7.303  12.930  1.00105.03           C
ATOM   2918  NE2 HIS A 362      11.660  -4.510  13.134  1.00105.03           N
ATOM   2919  CD2 HIS A 362      12.809  -5.084  12.619  1.00105.03           C
ATOM   2920  CE1 HIS A 362      11.203  -5.396  13.997  1.00105.03           C
ATOM   2921  C   HIS A 362      15.314  -8.649  11.237  1.00105.03           C
ATOM   2922  O   HIS A 362      15.263  -9.875  11.326  1.00105.03           O
ATOM   2923  N   TYR A 363      16.445  -7.994  10.884  1.00144.06           N
ATOM   2924  CA  TYR A 363      17.621  -8.755  10.566  1.00144.06           C
ATOM   2925  CB  TYR A 363      17.817  -9.037   9.063  1.00144.06           C
ATOM   2926  CG  TYR A 363      16.781 -10.002   8.593  1.00144.06           C
ATOM   2927  CD1 TYR A 363      15.512  -9.562   8.302  1.00144.06           C
ATOM   2928  CD2 TYR A 363      17.078 -11.338   8.429  1.00144.06           C
ATOM   2929  CE1 TYR A 363      14.550 -10.439   7.864  1.00144.06           C
ATOM   2930  CE2 TYR A 363      16.118 -12.221   7.989  1.00144.06           C
ATOM   2931  CZ  TYR A 363      14.850 -11.769   7.707  1.00144.06           C
ATOM   2932  OH  TYR A 363      13.855 -12.661   7.255  1.00144.06           O
ATOM   2933  C   TYR A 363      18.871  -8.046  11.002  1.00144.06           C
ATOM   2934  O   TYR A 363      18.864  -6.865  11.347  1.00144.06           O
ATOM   2935  N   ASP A 364      19.989  -8.807  11.006  1.00156.24           N
ATOM   2936  CA  ASP A 364      21.312  -8.279  11.215  1.00156.24           C
ATOM   2937  CB  ASP A 364      21.638  -7.092  10.289  1.00156.24           C
ATOM   2938  CG  ASP A 364      21.688  -7.575   8.843  1.00156.24           C
ATOM   2939  OD1 ASP A 364      21.389  -8.777   8.603  1.00156.24           O
ATOM   2940  OD2 ASP A 364      22.020  -6.741   7.957  1.00156.24           O
ATOM   2941  C   ASP A 364      21.526  -7.812  12.623  1.00156.24           C
ATOM   2942  O   ASP A 364      20.962  -8.342  13.579  1.00156.24           O
ATOM   2943  N   GLY A 365      22.435  -6.820  12.764  1.00 54.57           N
ATOM   2944  CA  GLY A 365      22.796  -6.253  14.032  1.00 54.57           C
ATOM   2945  C   GLY A 365      23.954  -7.040  14.565  1.00 54.57           C
ATOM   2946  O   GLY A 365      24.111  -8.224  14.282  1.00 54.57           O
ATOM   2947  N   PHE A 366      24.759  -6.391  15.421  1.00119.62           N
ATOM   2948  CA  PHE A 366      25.973  -6.903  15.992  1.00119.62           C
ATOM   2949  CB  PHE A 366      26.455  -5.910  17.073  1.00119.62           C
ATOM   2950  CG  PHE A 366      27.910  -5.990  17.380  1.00119.62           C
ATOM   2951  CD1 PHE A 366      28.814  -5.372  16.548  1.00119.62           C
ATOM   2952  CD2 PHE A 366      28.374  -6.630  18.505  1.00119.62           C
ATOM   2953  CE1 PHE A 366      30.161  -5.408  16.815  1.00119.62           C
ATOM   2954  CE2 PHE A 366      29.722  -6.671  18.780  1.00119.62           C
ATOM   2955  CZ  PHE A 366      30.618  -6.060  17.934  1.00119.62           C
ATOM   2956  C   PHE A 366      25.664  -8.220  16.650  1.00119.62           C
ATOM   2957  O   PHE A 366      24.646  -8.375  17.323  1.00119.62           O
ATOM   2958  N   MET A 367      26.574  -9.202  16.475  1.00189.62           N
ATOM   2959  CA  MET A 367      26.486 -10.512  17.069  1.00189.62           C
ATOM   2960  CB  MET A 367      26.827 -10.475  18.569  1.00189.62           C
ATOM   2961  CG  MET A 367      27.329 -11.802  19.129  1.00189.62           C
ATOM   2962  SD  MET A 367      28.980 -12.268  18.525  1.00189.62           S
ATOM   2963  CE  MET A 367      29.808 -10.776  19.149  1.00189.62           C
ATOM   2964  C   MET A 367      25.118 -11.116  16.870  1.00189.62           C
ATOM   2965  O   MET A 367      24.379 -11.323  17.835  1.00189.62           O
ATOM   2966  N   ASN A 368      24.745 -11.427  15.604  1.00181.09           N
ATOM   2967  CA  ASN A 368      23.422 -11.928  15.322  1.00181.09           C
ATOM   2968  CB  ASN A 368      22.929 -11.598  13.904  1.00181.09           C
ATOM   2969  CG  ASN A 368      21.423 -11.813  13.903  1.00181.09           C
ATOM   2970  OD1 ASN A 368      20.868 -12.415  14.821  1.00181.09           O
ATOM   2971  ND2 ASN A 368      20.735 -11.302  12.848  1.00181.09           N
ATOM   2972  C   ASN A 368      23.336 -13.424  15.485  1.00181.09           C
ATOM   2973  O   ASN A 368      23.133 -14.148  14.514  1.00181.09           O
ATOM   2974  N   PHE A 369      23.359 -13.920  16.738  1.00174.42           N
ATOM   2975  CA  PHE A 369      23.403 -15.338  17.003  1.00174.42           C
ATOM   2976  CB  PHE A 369      23.540 -15.652  18.506  1.00174.42           C
ATOM   2977  CG  PHE A 369      24.172 -16.998  18.680  1.00174.42           C
ATOM   2978  CD1 PHE A 369      23.441 -18.163  18.647  1.00174.42           C
ATOM   2979  CD2 PHE A 369      25.533 -17.080  18.878  1.00174.42           C
ATOM   2980  CE1 PHE A 369      24.060 -19.381  18.809  1.00174.42           C
ATOM   2981  CE2 PHE A 369      26.157 -18.295  19.042  1.00174.42           C
ATOM   2982  CZ  PHE A 369      25.418 -19.453  19.012  1.00174.42           C
ATOM   2983  C   PHE A 369      22.150 -16.023  16.509  1.00174.42           C
ATOM   2984  O   PHE A 369      22.204 -17.133  15.985  1.00174.42           O
ATOM   2985  N   MET A 370      20.992 -15.383  16.749  1.00186.08           N
ATOM   2986  CA  MET A 370      19.617 -15.737  16.481  1.00186.08           C
ATOM   2987  CB  MET A 370      18.638 -15.007  17.416  1.00186.08           C
ATOM   2988  CG  MET A 370      18.722 -15.506  18.857  1.00186.08           C
ATOM   2989  SD  MET A 370      18.111 -17.203  19.083  1.00186.08           S
ATOM   2990  CE  MET A 370      18.523 -17.296  20.850  1.00186.08           C
ATOM   2991  C   MET A 370      19.130 -15.533  15.069  1.00186.08           C
ATOM   2992  O   MET A 370      17.970 -15.845  14.809  1.00186.08           O
ATOM   2993  N   HIS A 371      19.914 -14.887  14.179  1.00 89.37           N
ATOM   2994  CA  HIS A 371      19.513 -14.476  12.846  1.00 89.37           C
ATOM   2995  ND1 HIS A 371      21.074 -12.356  10.301  1.00 89.37           N
ATOM   2996  CG  HIS A 371      20.493 -13.561  10.634  1.00 89.37           C
ATOM   2997  CB  HIS A 371      20.740 -14.298  11.920  1.00 89.37           C
ATOM   2998  NE2 HIS A 371      19.760 -12.915   8.598  1.00 89.37           N
ATOM   2999  CD2 HIS A 371      19.698 -13.887   9.581  1.00 89.37           C
ATOM   3000  CE1 HIS A 371      20.602 -12.017   9.075  1.00 89.37           C
ATOM   3001  C   HIS A 371      18.555 -15.436  12.179  1.00 89.37           C
ATOM   3002  O   HIS A 371      18.793 -16.641  12.101  1.00 89.37           O
ATOM   3003  N   ARG A 372      17.404 -14.894  11.706  1.00168.24           N
ATOM   3004  CA  ARG A 372      16.419 -15.659  10.980  1.00168.24           C
ATOM   3005  CB  ARG A 372      15.008 -15.058  11.024  1.00168.24           C
ATOM   3006  CG  ARG A 372      14.294 -15.339  12.347  1.00168.24           C
ATOM   3007  CD  ARG A 372      15.037 -14.813  13.574  1.00168.24           C
ATOM   3008  NE  ARG A 372      15.193 -13.343  13.405  1.00168.24           N
ATOM   3009  CZ  ARG A 372      14.853 -12.503  14.425  1.00168.24           C
ATOM   3010  NH1 ARG A 372      14.337 -13.009  15.584  1.00168.24           N
ATOM   3011  NH2 ARG A 372      15.025 -11.156  14.283  1.00168.24           N
ATOM   3012  C   ARG A 372      16.883 -15.716   9.554  1.00168.24           C
ATOM   3013  O   ARG A 372      17.134 -14.693   8.922  1.00168.24           O
ATOM   3014  N   ASP A 373      16.996 -16.949   9.028  1.00134.13           N
ATOM   3015  CA  ASP A 373      17.555 -17.302   7.750  1.00134.13           C
ATOM   3016  CB  ASP A 373      17.826 -18.815   7.629  1.00134.13           C
ATOM   3017  CG  ASP A 373      18.730 -19.041   6.425  1.00134.13           C
ATOM   3018  OD1 ASP A 373      19.461 -18.085   6.057  1.00134.13           O
ATOM   3019  OD2 ASP A 373      18.700 -20.164   5.853  1.00134.13           O
ATOM   3020  C   ASP A 373      16.734 -16.919   6.551  1.00134.13           C
ATOM   3021  O   ASP A 373      17.308 -16.678   5.490  1.00134.13           O
ATOM   3022  N   GLU A 374      15.388 -16.878   6.658  1.00133.18           N
ATOM   3023  CA  GLU A 374      14.563 -16.684   5.491  1.00133.18           C
ATOM   3024  CB  GLU A 374      13.051 -16.573   5.781  1.00133.18           C
ATOM   3025  CG  GLU A 374      12.614 -15.304   6.523  1.00133.18           C
ATOM   3026  CD  GLU A 374      12.761 -15.508   8.024  1.00133.18           C
ATOM   3027  OE1 GLU A 374      13.517 -16.428   8.437  1.00133.18           O
ATOM   3028  OE2 GLU A 374      12.114 -14.738   8.783  1.00133.18           O
ATOM   3029  C   GLU A 374      14.981 -15.448   4.755  1.00133.18           C
ATOM   3030  O   GLU A 374      15.238 -14.400   5.343  1.00133.18           O
ATOM   3031  N   GLU A 375      15.079 -15.574   3.415  1.00132.54           N
ATOM   3032  CA  GLU A 375      15.483 -14.505   2.547  1.00132.54           C
ATOM   3033  CB  GLU A 375      15.697 -14.939   1.087  1.00132.54           C
ATOM   3034  CG  GLU A 375      14.432 -15.451   0.398  1.00132.54           C
ATOM   3035  CD  GLU A 375      14.240 -16.898   0.815  1.00132.54           C
ATOM   3036  OE1 GLU A 375      15.224 -17.676   0.701  1.00132.54           O
ATOM   3037  OE2 GLU A 375      13.113 -17.245   1.255  1.00132.54           O
ATOM   3038  C   GLU A 375      14.424 -13.449   2.557  1.00132.54           C
ATOM   3039  O   GLU A 375      14.722 -12.275   2.335  1.00132.54           O
ATOM   3040  N   VAL A 376      13.148 -13.843   2.766  1.00163.79           N
ATOM   3041  CA  VAL A 376      12.087 -12.870   2.781  1.00163.79           C
ATOM   3042  CB  VAL A 376      10.703 -13.420   2.610  1.00163.79           C
ATOM   3043  CG1 VAL A 376      10.517 -13.780   1.136  1.00163.79           C
ATOM   3044  CG2 VAL A 376      10.507 -14.609   3.567  1.00163.79           C
ATOM   3045  C   VAL A 376      12.092 -12.094   4.054  1.00163.79           C
ATOM   3046  O   VAL A 376      11.492 -12.479   5.057  1.00163.79           O
ATOM   3047  N   ASP A 377      12.831 -10.975   4.009  1.00149.77           N
ATOM   3048  CA  ASP A 377      13.013  -9.981   5.025  1.00149.77           C
ATOM   3049  CB  ASP A 377      14.433  -9.372   5.022  1.00149.77           C
ATOM   3050  CG  ASP A 377      14.774  -8.772   3.664  1.00149.77           C
ATOM   3051  OD1 ASP A 377      13.893  -8.752   2.765  1.00149.77           O
ATOM   3052  OD2 ASP A 377      15.945  -8.333   3.509  1.00149.77           O
ATOM   3053  C   ASP A 377      11.965  -8.895   5.014  1.00149.77           C
ATOM   3054  O   ASP A 377      12.090  -7.931   5.768  1.00149.77           O
ATOM   3055  N   TYR A 378      10.985  -8.909   4.087  1.00233.95           N
ATOM   3056  CA  TYR A 378      10.074  -7.793   4.059  1.00233.95           C
ATOM   3057  CB  TYR A 378      10.340  -6.870   2.856  1.00233.95           C
ATOM   3058  CG  TYR A 378      10.222  -7.670   1.600  1.00233.95           C
ATOM   3059  CD1 TYR A 378      11.300  -8.379   1.116  1.00233.95           C
ATOM   3060  CD2 TYR A 378       9.032  -7.717   0.910  1.00233.95           C
ATOM   3061  CE1 TYR A 378      11.194  -9.115  -0.041  1.00233.95           C
ATOM   3062  CE2 TYR A 378       8.921  -8.451  -0.248  1.00233.95           C
ATOM   3063  CZ  TYR A 378      10.003  -9.150  -0.725  1.00233.95           C
ATOM   3064  OH  TYR A 378       9.891  -9.903  -1.912  1.00233.95           O
ATOM   3065  C   TYR A 378       8.635  -8.247   4.011  1.00233.95           C
ATOM   3066  O   TYR A 378       8.333  -9.328   3.512  1.00233.95           O
ATOM   3067  N   PHE A 379       7.718  -7.432   4.601  1.00191.53           N
ATOM   3068  CA  PHE A 379       6.285  -7.612   4.498  1.00191.53           C
ATOM   3069  CB  PHE A 379       5.545  -8.264   5.647  1.00191.53           C
ATOM   3070  CG  PHE A 379       5.151  -9.690   5.339  1.00191.53           C
ATOM   3071  CD1 PHE A 379       3.996  -9.922   4.619  1.00191.53           C
ATOM   3072  CD2 PHE A 379       5.899 -10.781   5.719  1.00191.53           C
ATOM   3073  CE1 PHE A 379       3.600 -11.199   4.273  1.00191.53           C
ATOM   3074  CE2 PHE A 379       5.511 -12.058   5.380  1.00191.53           C
ATOM   3075  CZ  PHE A 379       4.361 -12.276   4.660  1.00191.53           C
ATOM   3076  C   PHE A 379       5.640  -6.292   4.219  1.00191.53           C
ATOM   3077  O   PHE A 379       6.112  -5.254   4.680  1.00191.53           O
ATOM   3078  N   PRO A 380       4.575  -6.276   3.454  1.00190.24           N
ATOM   3079  CA  PRO A 380       4.021  -7.481   2.895  1.00190.24           C
ATOM   3080  CD  PRO A 380       3.536  -5.295   3.724  1.00190.24           C
ATOM   3081  CB  PRO A 380       2.600  -7.137   2.455  1.00190.24           C
ATOM   3082  CG  PRO A 380       2.204  -5.989   3.394  1.00190.24           C
ATOM   3083  C   PRO A 380       4.845  -8.124   1.827  1.00190.24           C
ATOM   3084  O   PRO A 380       5.726  -7.486   1.253  1.00190.24           O
ATOM   3085  N   SER A 381       4.578  -9.423   1.587  1.00 56.71           N
ATOM   3086  CA  SER A 381       5.250 -10.198   0.586  1.00 56.71           C
ATOM   3087  CB  SER A 381       6.497 -10.943   1.121  1.00 56.71           C
ATOM   3088  OG  SER A 381       6.183 -11.724   2.266  1.00 56.71           O
ATOM   3089  C   SER A 381       4.247 -11.181   0.053  1.00 56.71           C
ATOM   3090  O   SER A 381       3.105 -11.231   0.508  1.00 56.71           O
ATOM   3091  N   ARG A 382       4.642 -11.941  -0.986  1.00191.33           N
ATOM   3092  CA  ARG A 382       3.829 -12.925  -1.644  1.00191.33           C
ATOM   3093  CB  ARG A 382       4.518 -13.502  -2.891  1.00191.33           C
ATOM   3094  CG  ARG A 382       4.598 -12.548  -4.082  1.00191.33           C
ATOM   3095  CD  ARG A 382       5.532 -13.066  -5.177  1.00191.33           C
ATOM   3096  NE  ARG A 382       6.910 -12.979  -4.624  1.00191.33           N
ATOM   3097  CZ  ARG A 382       7.821 -12.142  -5.198  1.00191.33           C
ATOM   3098  NH1 ARG A 382       7.514 -11.492  -6.357  1.00191.33           N
ATOM   3099  NH2 ARG A 382       9.039 -11.953  -4.615  1.00191.33           N
ATOM   3100  C   ARG A 382       3.570 -14.093  -0.734  1.00191.33           C
ATOM   3101  O   ARG A 382       2.511 -14.711  -0.808  1.00191.33           O
ATOM   3102  N   TYR A 383       4.551 -14.421   0.131  1.00173.07           N
ATOM   3103  CA  TYR A 383       4.641 -15.602   0.954  1.00173.07           C
ATOM   3104  CB  TYR A 383       6.042 -15.811   1.547  1.00173.07           C
ATOM   3105  CG  TYR A 383       6.898 -16.019   0.369  1.00173.07           C
ATOM   3106  CD1 TYR A 383       6.806 -17.204  -0.315  1.00173.07           C
ATOM   3107  CD2 TYR A 383       7.742 -15.031  -0.074  1.00173.07           C
ATOM   3108  CE1 TYR A 383       7.577 -17.419  -1.427  1.00173.07           C
ATOM   3109  CE2 TYR A 383       8.517 -15.243  -1.188  1.00173.07           C
ATOM   3110  CZ  TYR A 383       8.433 -16.439  -1.863  1.00173.07           C
ATOM   3111  OH  TYR A 383       9.220 -16.668  -3.011  1.00173.07           O
ATOM   3112  C   TYR A 383       3.720 -15.663   2.130  1.00173.07           C
ATOM   3113  O   TYR A 383       3.230 -14.656   2.639  1.00173.07           O
ATOM   3114  N   ASP A 384       3.451 -16.922   2.550  1.00197.44           N
ATOM   3115  CA  ASP A 384       2.698 -17.227   3.730  1.00197.44           C
ATOM   3116  CB  ASP A 384       1.914 -18.550   3.585  1.00197.44           C
ATOM   3117  CG  ASP A 384       0.582 -18.406   4.318  1.00197.44           C
ATOM   3118  OD1 ASP A 384       0.542 -17.638   5.314  1.00197.44           O
ATOM   3119  OD2 ASP A 384      -0.417 -19.028   3.865  1.00197.44           O
ATOM   3120  C   ASP A 384       3.642 -17.305   4.936  1.00197.44           C
ATOM   3121  O   ASP A 384       3.236 -17.805   5.984  1.00197.44           O
ATOM   3122  N   PRO A 385       4.884 -16.841   4.908  1.00199.52           N
ATOM   3123  CA  PRO A 385       5.546 -16.704   6.188  1.00199.52           C
ATOM   3124  CD  PRO A 385       5.822 -17.529   4.020  1.00199.52           C
ATOM   3125  CB  PRO A 385       7.043 -16.633   5.927  1.00199.52           C
ATOM   3126  CG  PRO A 385       7.163 -17.641   4.775  1.00199.52           C
ATOM   3127  C   PRO A 385       4.896 -15.678   7.055  1.00199.52           C
ATOM   3128  O   PRO A 385       3.840 -15.176   6.669  1.00199.52           O
ATOM   3129  N   VAL A 386       5.504 -15.363   8.223  1.00183.21           N
ATOM   3130  CA  VAL A 386       4.754 -14.735   9.276  1.00183.21           C
ATOM   3131  CB  VAL A 386       5.510 -14.481  10.536  1.00183.21           C
ATOM   3132  CG1 VAL A 386       6.423 -15.690  10.819  1.00183.21           C
ATOM   3133  CG2 VAL A 386       6.183 -13.144  10.445  1.00183.21           C
ATOM   3134  C   VAL A 386       3.979 -13.540   8.838  1.00183.21           C
ATOM   3135  O   VAL A 386       4.366 -12.760   7.966  1.00183.21           O
ATOM   3136  N   ARG A 387       2.796 -13.430   9.464  1.00142.07           N
ATOM   3137  CA  ARG A 387       1.792 -12.488   9.091  1.00142.07           C
ATOM   3138  CB  ARG A 387       0.605 -13.199   8.425  1.00142.07           C
ATOM   3139  CG  ARG A 387       0.789 -13.519   6.941  1.00142.07           C
ATOM   3140  CD  ARG A 387      -0.127 -12.629   6.101  1.00142.07           C
ATOM   3141  NE  ARG A 387      -1.472 -12.750   6.735  1.00142.07           N
ATOM   3142  CZ  ARG A 387      -2.370 -13.698   6.334  1.00142.07           C
ATOM   3143  NH1 ARG A 387      -2.246 -14.318   5.121  1.00142.07           N
ATOM   3144  NH2 ARG A 387      -3.389 -14.043   7.175  1.00142.07           N
ATOM   3145  C   ARG A 387       1.222 -11.834  10.319  1.00142.07           C
ATOM   3146  O   ARG A 387       1.277 -12.376  11.423  1.00142.07           O
ATOM   3147  N   HIS A 388       0.642 -10.628  10.119  1.00111.80           N
ATOM   3148  CA  HIS A 388       0.009  -9.834  11.142  1.00111.80           C
ATOM   3149  ND1 HIS A 388      -0.158  -7.247   8.394  1.00111.80           N
ATOM   3150  CG  HIS A 388      -0.731  -8.186   9.232  1.00111.80           C
ATOM   3151  CB  HIS A 388      -0.298  -8.388  10.675  1.00111.80           C
ATOM   3152  NE2 HIS A 388      -1.697  -8.302   7.186  1.00111.80           N
ATOM   3153  CD2 HIS A 388      -1.670  -8.821   8.470  1.00111.80           C
ATOM   3154  CE1 HIS A 388      -0.774  -7.358   7.187  1.00111.80           C
ATOM   3155  C   HIS A 388      -1.280 -10.486  11.563  1.00111.80           C
ATOM   3156  O   HIS A 388      -1.983 -11.072  10.740  1.00111.80           O
ATOM   3157  N   ALA A 389      -1.607 -10.417  12.877  1.00 64.60           N
ATOM   3158  CA  ALA A 389      -2.844 -10.957  13.380  1.00 64.60           C
ATOM   3159  CB  ALA A 389      -2.684 -11.806  14.654  1.00 64.60           C
ATOM   3160  C   ALA A 389      -3.729  -9.802  13.751  1.00 64.60           C
ATOM   3161  O   ALA A 389      -3.506  -9.092  14.729  1.00 64.60           O
ATOM   3162  N   GLU A 390      -4.839  -9.678  13.014  1.00122.09           N
ATOM   3163  CA  GLU A 390      -5.798  -8.619  13.077  1.00122.09           C
ATOM   3164  CB  GLU A 390      -6.954  -8.897  12.089  1.00122.09           C
ATOM   3165  CG  GLU A 390      -8.046  -7.832  11.954  1.00122.09           C
ATOM   3166  CD  GLU A 390      -8.810  -8.191  10.686  1.00122.09           C
ATOM   3167  OE1 GLU A 390      -8.184  -8.822   9.792  1.00122.09           O
ATOM   3168  OE2 GLU A 390     -10.017  -7.847  10.585  1.00122.09           O
ATOM   3169  C   GLU A 390      -6.348  -8.538  14.462  1.00122.09           C
ATOM   3170  O   GLU A 390      -6.592  -7.446  14.975  1.00122.09           O
ATOM   3171  N   LYS A 391      -6.492  -9.712  15.097  1.00124.49           N
ATOM   3172  CA  LYS A 391      -7.053  -9.918  16.402  1.00124.49           C
ATOM   3173  CB  LYS A 391      -7.000 -11.378  16.887  1.00124.49           C
ATOM   3174  CG  LYS A 391      -8.056 -12.333  16.334  1.00124.49           C
ATOM   3175  CD  LYS A 391      -7.779 -13.786  16.721  1.00124.49           C
ATOM   3176  CE  LYS A 391      -8.936 -14.714  16.377  1.00124.49           C
ATOM   3177  NZ  LYS A 391      -9.103 -14.752  14.911  1.00124.49           N
ATOM   3178  C   LYS A 391      -6.250  -9.190  17.419  1.00124.49           C
ATOM   3179  O   LYS A 391      -6.787  -8.814  18.461  1.00124.49           O
ATOM   3180  N   TYR A 392      -4.944  -8.930  17.171  1.00180.06           N
ATOM   3181  CA  TYR A 392      -4.168  -8.366  18.244  1.00180.06           C
ATOM   3182  CB  TYR A 392      -2.861  -9.149  18.442  1.00180.06           C
ATOM   3183  CG  TYR A 392      -3.241 -10.436  19.097  1.00180.06           C
ATOM   3184  CD1 TYR A 392      -3.837 -11.470  18.407  1.00180.06           C
ATOM   3185  CD2 TYR A 392      -2.986 -10.595  20.437  1.00180.06           C
ATOM   3186  CE1 TYR A 392      -4.173 -12.638  19.057  1.00180.06           C
ATOM   3187  CE2 TYR A 392      -3.317 -11.756  21.086  1.00180.06           C
ATOM   3188  CZ  TYR A 392      -3.913 -12.781  20.400  1.00180.06           C
ATOM   3189  OH  TYR A 392      -4.253 -13.971  21.077  1.00180.06           O
ATOM   3190  C   TYR A 392      -3.855  -6.885  18.156  1.00180.06           C
ATOM   3191  O   TYR A 392      -2.902  -6.460  18.809  1.00180.06           O
ATOM   3192  N   PRO A 393      -4.636  -6.053  17.498  1.00141.35           N
ATOM   3193  CA  PRO A 393      -4.340  -4.642  17.404  1.00141.35           C
ATOM   3194  CD  PRO A 393      -6.076  -6.239  17.450  1.00141.35           C
ATOM   3195  CB  PRO A 393      -5.501  -4.045  16.622  1.00141.35           C
ATOM   3196  CG  PRO A 393      -6.694  -4.878  17.111  1.00141.35           C
ATOM   3197  C   PRO A 393      -4.440  -4.050  18.746  1.00141.35           C
ATOM   3198  O   PRO A 393      -5.273  -4.514  19.519  1.00141.35           O
ATOM   3199  N   ILE A 394      -3.651  -3.016  19.059  1.00117.31           N
ATOM   3200  CA  ILE A 394      -3.988  -2.447  20.319  1.00117.31           C
ATOM   3201  CB  ILE A 394      -2.917  -1.676  21.020  1.00117.31           C
ATOM   3202  CG1 ILE A 394      -3.338  -1.496  22.489  1.00117.31           C
ATOM   3203  CG2 ILE A 394      -2.690  -0.352  20.271  1.00117.31           C
ATOM   3204  CD1 ILE A 394      -2.235  -0.971  23.406  1.00117.31           C
ATOM   3205  C   ILE A 394      -5.128  -1.521  20.044  1.00117.31           C
ATOM   3206  O   ILE A 394      -5.126  -0.765  19.074  1.00117.31           O
ATOM   3207  N   PRO A 395      -6.123  -1.588  20.874  1.00104.32           N
ATOM   3208  CA  PRO A 395      -7.297  -0.793  20.652  1.00104.32           C
ATOM   3209  CD  PRO A 395      -6.424  -2.825  21.577  1.00104.32           C
ATOM   3210  CB  PRO A 395      -8.359  -1.348  21.599  1.00104.32           C
ATOM   3211  CG  PRO A 395      -7.950  -2.823  21.772  1.00104.32           C
ATOM   3212  C   PRO A 395      -7.036   0.666  20.838  1.00104.32           C
ATOM   3213  O   PRO A 395      -6.061   1.045  21.486  1.00104.32           O
ATOM   3214  N   SER A 396      -7.900   1.500  20.241  1.00 88.36           N
ATOM   3215  CA  SER A 396      -7.794   2.924  20.334  1.00 88.36           C
ATOM   3216  CB  SER A 396      -8.828   3.627  19.437  1.00 88.36           C
ATOM   3217  OG  SER A 396      -8.719   5.037  19.531  1.00 88.36           O
ATOM   3218  C   SER A 396      -8.071   3.321  21.756  1.00 88.36           C
ATOM   3219  O   SER A 396      -8.780   2.621  22.477  1.00 88.36           O
ATOM   3220  N   ASN A 397      -7.480   4.454  22.197  1.00 99.22           N
ATOM   3221  CA  ASN A 397      -7.692   4.998  23.515  1.00 99.22           C
ATOM   3222  CB  ASN A 397      -6.406   5.054  24.364  1.00 99.22           C
ATOM   3223  CG  ASN A 397      -6.770   5.406  25.802  1.00 99.22           C
ATOM   3224  OD1 ASN A 397      -7.820   5.013  26.306  1.00 99.22           O
ATOM   3225  ND2 ASN A 397      -5.872   6.166  26.486  1.00 99.22           N
ATOM   3226  C   ASN A 397      -8.158   6.414  23.298  1.00 99.22           C
ATOM   3227  O   ASN A 397      -7.941   6.979  22.229  1.00 99.22           O
ATOM   3228  N   VAL A 398      -8.821   7.035  24.297  1.00109.66           N
ATOM   3229  CA  VAL A 398      -9.397   8.340  24.084  1.00109.66           C
ATOM   3230  CB  VAL A 398     -10.598   8.627  24.940  1.00109.66           C
ATOM   3231  CG1 VAL A 398     -10.124   8.886  26.379  1.00109.66           C
ATOM   3232  CG2 VAL A 398     -11.385   9.791  24.315  1.00109.66           C
ATOM   3233  C   VAL A 398      -8.410   9.447  24.337  1.00109.66           C
ATOM   3234  O   VAL A 398      -7.445   9.287  25.084  1.00109.66           O
ATOM   3235  N   LEU A 399      -8.622  10.598  23.653  1.00130.91           N
ATOM   3236  CA  LEU A 399      -7.862  11.807  23.860  1.00130.91           C
ATOM   3237  CB  LEU A 399      -7.079  12.314  22.634  1.00130.91           C
ATOM   3238  CG  LEU A 399      -5.752  11.575  22.370  1.00130.91           C
ATOM   3239  CD1 LEU A 399      -4.730  11.885  23.477  1.00130.91           C
ATOM   3240  CD2 LEU A 399      -5.958  10.071  22.152  1.00130.91           C
ATOM   3241  C   LEU A 399      -8.811  12.911  24.246  1.00130.91           C
ATOM   3242  O   LEU A 399      -9.962  12.918  23.809  1.00130.91           O
ATOM   3243  N   ASN A 400      -8.369  13.862  25.108  1.00188.73           N
ATOM   3244  CA  ASN A 400      -9.275  14.924  25.464  1.00188.73           C
ATOM   3245  CB  ASN A 400      -9.889  14.738  26.868  1.00188.73           C
ATOM   3246  CG  ASN A 400      -8.771  14.699  27.904  1.00188.73           C
ATOM   3247  OD1 ASN A 400      -7.647  14.295  27.610  1.00188.73           O
ATOM   3248  ND2 ASN A 400      -9.091  15.110  29.160  1.00188.73           N
ATOM   3249  C   ASN A 400      -8.627  16.300  25.432  1.00188.73           C
ATOM   3250  O   ASN A 400      -8.840  17.071  26.368  1.00188.73           O
ATOM   3251  N   GLY A 401      -7.895  16.699  24.352  1.00 87.29           N
ATOM   3252  CA  GLY A 401      -7.310  18.036  24.359  1.00 87.29           C
ATOM   3253  C   GLY A 401      -6.633  18.393  23.028  1.00 87.29           C
ATOM   3254  O   GLY A 401      -6.828  17.691  22.037  1.00 87.29           O
ATOM   3255  N   LYS A 402      -5.864  19.537  22.990  1.00288.23           N
ATOM   3256  CA  LYS A 402      -5.079  20.089  21.873  1.00288.23           C
ATOM   3257  CB  LYS A 402      -5.684  21.430  21.421  1.00288.23           C
ATOM   3258  CG  LYS A 402      -7.142  21.317  20.946  1.00288.23           C
ATOM   3259  CD  LYS A 402      -7.911  22.643  21.039  1.00288.23           C
ATOM   3260  CE  LYS A 402      -9.259  22.678  20.309  1.00288.23           C
ATOM   3261  NZ  LYS A 402      -9.094  23.292  18.971  1.00288.23           N
ATOM   3262  C   LYS A 402      -3.593  20.333  22.367  1.00288.23           C
ATOM   3263  O   LYS A 402      -3.393  21.321  23.070  1.00288.23           O
ATOM   3264  N   ARG A 403      -2.534  19.544  21.897  1.00277.22           N
ATOM   3265  CA  ARG A 403      -1.103  19.211  22.258  1.00277.22           C
ATOM   3266  CB  ARG A 403      -0.408  18.399  21.164  1.00277.22           C
ATOM   3267  CG  ARG A 403      -1.116  17.112  20.756  1.00277.22           C
ATOM   3268  CD  ARG A 403      -0.416  16.434  19.578  1.00277.22           C
ATOM   3269  NE  ARG A 403       0.734  17.305  19.190  1.00277.22           N
ATOM   3270  CZ  ARG A 403       0.513  18.382  18.375  1.00277.22           C
ATOM   3271  NH1 ARG A 403      -0.759  18.664  17.961  1.00277.22           N
ATOM   3272  NH2 ARG A 403       1.547  19.200  18.012  1.00277.22           N
ATOM   3273  C   ARG A 403      -0.069  20.296  22.585  1.00277.22           C
ATOM   3274  O   ARG A 403      -0.079  21.376  21.999  1.00277.22           O
ATOM   3275  N   ASP A 404       0.921  19.973  23.503  1.00181.09           N
ATOM   3276  CA  ASP A 404       1.932  20.934  23.945  1.00181.09           C
ATOM   3277  CB  ASP A 404       1.224  22.294  24.233  1.00181.09           C
ATOM   3278  CG  ASP A 404       2.108  23.415  24.772  1.00181.09           C
ATOM   3279  OD1 ASP A 404       3.075  23.826  24.081  1.00181.09           O
ATOM   3280  OD2 ASP A 404       1.832  23.845  25.924  1.00181.09           O
ATOM   3281  C   ASP A 404       2.602  20.475  25.232  1.00181.09           C
ATOM   3282  O   ASP A 404       2.287  19.418  25.775  1.00181.09           O
ATOM   3283  N   ARG A 405       3.601  21.255  25.729  1.00105.96           N
ATOM   3284  CA  ARG A 405       4.211  21.017  27.009  1.00105.96           C
ATOM   3285  CB  ARG A 405       5.648  21.574  27.115  1.00105.96           C
ATOM   3286  CG  ARG A 405       6.661  20.868  26.211  1.00105.96           C
ATOM   3287  CD  ARG A 405       8.122  21.101  26.619  1.00105.96           C
ATOM   3288  NE  ARG A 405       9.016  20.755  25.468  1.00105.96           N
ATOM   3289  CZ  ARG A 405       9.818  19.648  25.435  1.00105.96           C
ATOM   3290  NH1 ARG A 405       9.828  18.731  26.444  1.00105.96           N
ATOM   3291  NH2 ARG A 405      10.647  19.473  24.368  1.00105.96           N
ATOM   3292  C   ARG A 405       3.326  21.689  28.023  1.00105.96           C
ATOM   3293  O   ARG A 405       3.411  22.896  28.249  1.00105.96           O
ATOM   3294  N   GLN A 406       2.438  20.895  28.666  1.00109.93           N
ATOM   3295  CA  GLN A 406       1.473  21.431  29.592  1.00109.93           C
ATOM   3296  CB  GLN A 406       0.058  21.542  28.992  1.00109.93           C
ATOM   3297  CG  GLN A 406      -0.110  22.698  28.001  1.00109.93           C
ATOM   3298  CD  GLN A 406      -0.340  23.960  28.820  1.00109.93           C
ATOM   3299  OE1 GLN A 406       0.603  24.608  29.272  1.00109.93           O
ATOM   3300  NE2 GLN A 406      -1.637  24.308  29.037  1.00109.93           N
ATOM   3301  C   GLN A 406       1.379  20.585  30.823  1.00109.93           C
ATOM   3302  O   GLN A 406       0.980  19.426  30.765  1.00109.93           O
ATOM   3303  N   ILE A 407       1.690  21.173  31.995  1.00143.54           N
ATOM   3304  CA  ILE A 407       1.700  20.444  33.234  1.00143.54           C
ATOM   3305  CB  ILE A 407       2.527  21.080  34.315  1.00143.54           C
ATOM   3306  CG1 ILE A 407       2.750  20.089  35.471  1.00143.54           C
ATOM   3307  CG2 ILE A 407       1.844  22.389  34.740  1.00143.54           C
ATOM   3308  CD1 ILE A 407       3.633  18.899  35.100  1.00143.54           C
ATOM   3309  C   ILE A 407       0.299  20.255  33.748  1.00143.54           C
ATOM   3310  O   ILE A 407      -0.552  21.130  33.596  1.00143.54           O
ATOM   3311  N   ILE A 408       0.025  19.072  34.349  1.00145.17           N
ATOM   3312  CA  ILE A 408      -1.292  18.754  34.846  1.00145.17           C
ATOM   3313  CB  ILE A 408      -1.507  17.317  35.266  1.00145.17           C
ATOM   3314  CG1 ILE A 408      -0.561  16.869  36.394  1.00145.17           C
ATOM   3315  CG2 ILE A 408      -1.411  16.451  33.997  1.00145.17           C
ATOM   3316  CD1 ILE A 408      -0.889  17.437  37.771  1.00145.17           C
ATOM   3317  C   ILE A 408      -1.717  19.716  35.919  1.00145.17           C
ATOM   3318  O   ILE A 408      -0.897  20.280  36.640  1.00145.17           O
ATOM   3319  N   VAL A 409      -3.043  19.986  35.962  1.00116.87           N
ATOM   3320  CA  VAL A 409      -3.667  20.961  36.821  1.00116.87           C
ATOM   3321  CB  VAL A 409      -5.112  21.197  36.483  1.00116.87           C
ATOM   3322  CG1 VAL A 409      -5.891  19.882  36.656  1.00116.87           C
ATOM   3323  CG2 VAL A 409      -5.637  22.342  37.367  1.00116.87           C
ATOM   3324  C   VAL A 409      -3.594  20.677  38.301  1.00116.87           C
ATOM   3325  O   VAL A 409      -3.134  21.537  39.051  1.00116.87           O
ATOM   3326  N   LYS A 410      -4.015  19.489  38.795  1.00180.43           N
ATOM   3327  CA  LYS A 410      -4.032  19.369  40.238  1.00180.43           C
ATOM   3328  CB  LYS A 410      -5.202  18.557  40.830  1.00180.43           C
ATOM   3329  CG  LYS A 410      -6.595  19.162  40.639  1.00180.43           C
ATOM   3330  CD  LYS A 410      -7.156  18.956  39.233  1.00180.43           C
ATOM   3331  CE  LYS A 410      -7.493  17.492  38.937  1.00180.43           C
ATOM   3332  NZ  LYS A 410      -8.692  17.077  39.701  1.00180.43           N
ATOM   3333  C   LYS A 410      -2.800  18.669  40.711  1.00180.43           C
ATOM   3334  O   LYS A 410      -2.770  17.442  40.802  1.00180.43           O
ATOM   3335  N   GLU A 411      -1.755  19.453  41.043  1.00 57.06           N
ATOM   3336  CA  GLU A 411      -0.501  18.925  41.498  1.00 57.06           C
ATOM   3337  CB  GLU A 411       0.600  19.993  41.584  1.00 57.06           C
ATOM   3338  CG  GLU A 411       1.055  20.520  40.224  1.00 57.06           C
ATOM   3339  CD  GLU A 411       2.004  21.680  40.478  1.00 57.06           C
ATOM   3340  OE1 GLU A 411       2.106  22.112  41.658  1.00 57.06           O
ATOM   3341  OE2 GLU A 411       2.637  22.155  39.497  1.00 57.06           O
ATOM   3342  C   GLU A 411      -0.629  18.325  42.863  1.00 57.06           C
ATOM   3343  O   GLU A 411      -0.128  17.227  43.100  1.00 57.06           O
ATOM   3344  N   ASN A 412      -1.298  19.041  43.795  1.00 65.17           N
ATOM   3345  CA  ASN A 412      -1.511  18.554  45.132  1.00 65.17           C
ATOM   3346  CB  ASN A 412      -2.541  17.409  45.141  1.00 65.17           C
ATOM   3347  CG  ASN A 412      -2.998  17.169  46.564  1.00 65.17           C
ATOM   3348  OD1 ASN A 412      -2.274  17.473  47.510  1.00 65.17           O
ATOM   3349  ND2 ASN A 412      -4.228  16.610  46.724  1.00 65.17           N
ATOM   3350  C   ASN A 412      -0.205  18.055  45.695  1.00 65.17           C
ATOM   3351  O   ASN A 412      -0.106  16.910  46.130  1.00 65.17           O
ATOM   3352  N   ASN A 413       0.841  18.908  45.693  1.00 87.39           N
ATOM   3353  CA  ASN A 413       2.171  18.515  46.091  1.00 87.39           C
ATOM   3354  CB  ASN A 413       3.216  19.629  45.926  1.00 87.39           C
ATOM   3355  CG  ASN A 413       3.407  19.946  44.454  1.00 87.39           C
ATOM   3356  OD1 ASN A 413       3.551  19.055  43.619  1.00 87.39           O
ATOM   3357  ND2 ASN A 413       3.413  21.266  44.128  1.00 87.39           N
ATOM   3358  C   ASN A 413       2.258  18.138  47.539  1.00 87.39           C
ATOM   3359  O   ASN A 413       3.051  17.267  47.896  1.00 87.39           O
ATOM   3360  N   PHE A 414       1.600  18.929  48.408  1.00122.23           N
ATOM   3361  CA  PHE A 414       1.633  18.784  49.841  1.00122.23           C
ATOM   3362  CB  PHE A 414       1.650  20.160  50.500  1.00122.23           C
ATOM   3363  CG  PHE A 414       2.858  20.774  49.886  1.00122.23           C
ATOM   3364  CD1 PHE A 414       4.109  20.375  50.290  1.00122.23           C
ATOM   3365  CD2 PHE A 414       2.749  21.747  48.920  1.00122.23           C
ATOM   3366  CE1 PHE A 414       5.239  20.926  49.738  1.00122.23           C
ATOM   3367  CE2 PHE A 414       3.877  22.303  48.364  1.00122.23           C
ATOM   3368  CZ  PHE A 414       5.125  21.895  48.772  1.00122.23           C
ATOM   3369  C   PHE A 414       0.568  17.939  50.497  1.00122.23           C
ATOM   3370  O   PHE A 414       0.830  17.331  51.535  1.00122.23           O
ATOM   3371  N   LYS A 415      -0.678  17.933  49.966  1.00179.19           N
ATOM   3372  CA  LYS A 415      -1.771  17.329  50.695  1.00179.19           C
ATOM   3373  CB  LYS A 415      -3.171  17.566  50.091  1.00179.19           C
ATOM   3374  CG  LYS A 415      -4.296  16.857  50.858  1.00179.19           C
ATOM   3375  CD  LYS A 415      -4.514  17.361  52.287  1.00179.19           C
ATOM   3376  CE  LYS A 415      -5.457  18.562  52.392  1.00179.19           C
ATOM   3377  NZ  LYS A 415      -4.817  19.761  51.809  1.00179.19           N
ATOM   3378  C   LYS A 415      -1.623  15.857  50.905  1.00179.19           C
ATOM   3379  O   LYS A 415      -1.760  15.387  52.032  1.00179.19           O
ATOM   3380  N   GLN A 416      -1.342  15.080  49.845  1.00 65.46           N
ATOM   3381  CA  GLN A 416      -1.241  13.660  50.039  1.00 65.46           C
ATOM   3382  CB  GLN A 416      -1.088  12.849  48.742  1.00 65.46           C
ATOM   3383  CG  GLN A 416      -1.080  11.342  49.012  1.00 65.46           C
ATOM   3384  CD  GLN A 416      -1.119  10.608  47.682  1.00 65.46           C
ATOM   3385  OE1 GLN A 416      -0.083  10.260  47.118  1.00 65.46           O
ATOM   3386  NE2 GLN A 416      -2.354  10.364  47.165  1.00 65.46           N
ATOM   3387  C   GLN A 416      -0.074  13.339  50.925  1.00 65.46           C
ATOM   3388  O   GLN A 416      -0.175  12.440  51.760  1.00 65.46           O
ATOM   3389  N   PRO A 417       1.035  14.021  50.783  1.00133.16           N
ATOM   3390  CA  PRO A 417       2.149  13.762  51.650  1.00133.16           C
ATOM   3391  CD  PRO A 417       1.475  14.544  49.496  1.00133.16           C
ATOM   3392  CB  PRO A 417       3.294  14.621  51.119  1.00133.16           C
ATOM   3393  CG  PRO A 417       3.003  14.696  49.607  1.00133.16           C
ATOM   3394  C   PRO A 417       1.786  13.988  53.083  1.00133.16           C
ATOM   3395  O   PRO A 417       2.285  13.259  53.939  1.00133.16           O
ATOM   3396  N   GLY A 418       0.932  14.984  53.378  1.00 25.15           N
ATOM   3397  CA  GLY A 418       0.538  15.221  54.736  1.00 25.15           C
ATOM   3398  C   GLY A 418      -0.242  14.044  55.225  1.00 25.15           C
ATOM   3399  O   GLY A 418      -0.043  13.577  56.344  1.00 25.15           O
ATOM   3400  N   GLU A 419      -1.150  13.528  54.377  1.00 51.27           N
ATOM   3401  CA  GLU A 419      -2.005  12.434  54.735  1.00 51.27           C
ATOM   3402  CB  GLU A 419      -3.028  12.139  53.623  1.00 51.27           C
ATOM   3403  CG  GLU A 419      -3.995  13.315  53.439  1.00 51.27           C
ATOM   3404  CD  GLU A 419      -4.850  13.099  52.199  1.00 51.27           C
ATOM   3405  OE1 GLU A 419      -4.298  12.649  51.160  1.00 51.27           O
ATOM   3406  OE2 GLU A 419      -6.071  13.401  52.272  1.00 51.27           O
ATOM   3407  C   GLU A 419      -1.154  11.231  54.998  1.00 51.27           C
ATOM   3408  O   GLU A 419      -1.399  10.492  55.950  1.00 51.27           O
ATOM   3409  N   ARG A 420      -0.111  11.009  54.176  1.00124.57           N
ATOM   3410  CA  ARG A 420       0.719   9.864  54.404  1.00124.57           C
ATOM   3411  CB  ARG A 420       1.804   9.628  53.351  1.00124.57           C
ATOM   3412  CG  ARG A 420       2.616   8.384  53.705  1.00124.57           C
ATOM   3413  CD  ARG A 420       3.224   7.689  52.497  1.00124.57           C
ATOM   3414  NE  ARG A 420       2.083   7.324  51.609  1.00124.57           N
ATOM   3415  CZ  ARG A 420       1.232   6.317  51.967  1.00124.57           C
ATOM   3416  NH1 ARG A 420       1.420   5.651  53.142  1.00124.57           N
ATOM   3417  NH2 ARG A 420       0.175   5.997  51.164  1.00124.57           N
ATOM   3418  C   ARG A 420       1.390   9.997  55.730  1.00124.57           C
ATOM   3419  O   ARG A 420       1.517   9.020  56.464  1.00124.57           O
ATOM   3420  N   TYR A 421       1.830  11.214  56.085  1.00139.22           N
ATOM   3421  CA  TYR A 421       2.506  11.398  57.335  1.00139.22           C
ATOM   3422  CB  TYR A 421       2.960  12.854  57.514  1.00139.22           C
ATOM   3423  CG  TYR A 421       3.516  12.993  58.883  1.00139.22           C
ATOM   3424  CD1 TYR A 421       4.816  12.629  59.139  1.00139.22           C
ATOM   3425  CD2 TYR A 421       2.731  13.465  59.909  1.00139.22           C
ATOM   3426  CE1 TYR A 421       5.332  12.751  60.405  1.00139.22           C
ATOM   3427  CE2 TYR A 421       3.243  13.589  61.177  1.00139.22           C
ATOM   3428  CZ  TYR A 421       4.547  13.232  61.424  1.00139.22           C
ATOM   3429  OH  TYR A 421       5.079  13.357  62.725  1.00139.22           O
ATOM   3430  C   TYR A 421       1.586  11.042  58.468  1.00139.22           C
ATOM   3431  O   TYR A 421       1.959  10.304  59.379  1.00139.22           O
ATOM   3432  N   ARG A 422       0.337  11.531  58.418  1.00 71.45           N
ATOM   3433  CA  ARG A 422      -0.609  11.339  59.480  1.00 71.45           C
ATOM   3434  CB  ARG A 422      -1.840  12.251  59.339  1.00 71.45           C
ATOM   3435  CG  ARG A 422      -1.440  13.719  59.533  1.00 71.45           C
ATOM   3436  CD  ARG A 422      -2.595  14.720  59.585  1.00 71.45           C
ATOM   3437  NE  ARG A 422      -3.109  14.910  58.201  1.00 71.45           N
ATOM   3438  CZ  ARG A 422      -2.539  15.848  57.388  1.00 71.45           C
ATOM   3439  NH1 ARG A 422      -1.454  16.556  57.818  1.00 71.45           N
ATOM   3440  NH2 ARG A 422      -3.057  16.082  56.146  1.00 71.45           N
ATOM   3441  C   ARG A 422      -1.001   9.899  59.599  1.00 71.45           C
ATOM   3442  O   ARG A 422      -1.358   9.445  60.685  1.00 71.45           O
ATOM   3443  N   SER A 423      -0.979   9.150  58.482  1.00 80.47           N
ATOM   3444  CA  SER A 423      -1.362   7.765  58.496  1.00 80.47           C
ATOM   3445  CB  SER A 423      -1.512   7.164  57.086  1.00 80.47           C
ATOM   3446  OG  SER A 423      -0.265   7.154  56.407  1.00 80.47           O
ATOM   3447  C   SER A 423      -0.364   6.934  59.258  1.00 80.47           C
ATOM   3448  O   SER A 423      -0.704   5.844  59.714  1.00 80.47           O
ATOM   3449  N   PHE A 424       0.887   7.414  59.429  1.00112.11           N
ATOM   3450  CA  PHE A 424       1.916   6.631  60.072  1.00112.11           C
ATOM   3451  CB  PHE A 424       3.353   7.135  59.838  1.00112.11           C
ATOM   3452  CG  PHE A 424       3.773   6.692  58.482  1.00112.11           C
ATOM   3453  CD1 PHE A 424       4.347   5.453  58.318  1.00112.11           C
ATOM   3454  CD2 PHE A 424       3.596   7.494  57.381  1.00112.11           C
ATOM   3455  CE1 PHE A 424       4.742   5.020  57.075  1.00112.11           C
ATOM   3456  CE2 PHE A 424       3.989   7.067  56.134  1.00112.11           C
ATOM   3457  CZ  PHE A 424       4.563   5.827  55.980  1.00112.11           C
ATOM   3458  C   PHE A 424       1.734   6.533  61.554  1.00112.11           C
ATOM   3459  O   PHE A 424       1.091   7.366  62.193  1.00112.11           O
ATOM   3460  N   ASP A 425       2.307   5.454  62.130  1.00104.69           N
ATOM   3461  CA  ASP A 425       2.274   5.223  63.543  1.00104.69           C
ATOM   3462  CB  ASP A 425       2.657   3.781  63.922  1.00104.69           C
ATOM   3463  CG  ASP A 425       2.096   3.459  65.300  1.00104.69           C
ATOM   3464  OD1 ASP A 425       0.884   3.728  65.518  1.00104.69           O
ATOM   3465  OD2 ASP A 425       2.859   2.916  66.143  1.00104.69           O
ATOM   3466  C   ASP A 425       3.302   6.143  64.123  1.00104.69           C
ATOM   3467  O   ASP A 425       4.109   6.721  63.395  1.00104.69           O
ATOM   3468  N   PRO A 426       3.283   6.326  65.413  1.00 95.58           N
ATOM   3469  CA  PRO A 426       4.253   7.205  66.003  1.00 95.58           C
ATOM   3470  CD  PRO A 426       2.020   6.370  66.132  1.00 95.58           C
ATOM   3471  CB  PRO A 426       3.767   7.469  67.424  1.00 95.58           C
ATOM   3472  CG  PRO A 426       2.237   7.357  67.291  1.00 95.58           C
ATOM   3473  C   PRO A 426       5.666   6.726  65.885  1.00 95.58           C
ATOM   3474  O   PRO A 426       6.569   7.561  65.854  1.00 95.58           O
ATOM   3475  N   ALA A 427       5.894   5.402  65.835  1.00 20.37           N
ATOM   3476  CA  ALA A 427       7.236   4.914  65.718  1.00 20.37           C
ATOM   3477  CB  ALA A 427       7.314   3.379  65.753  1.00 20.37           C
ATOM   3478  C   ALA A 427       7.775   5.367  64.398  1.00 20.37           C
ATOM   3479  O   ALA A 427       8.920   5.805  64.290  1.00 20.37           O
ATOM   3480  N   ARG A 428       6.940   5.267  63.350  1.00 95.13           N
ATOM   3481  CA  ARG A 428       7.328   5.637  62.021  1.00 95.13           C
ATOM   3482  CB  ARG A 428       6.279   5.224  60.977  1.00 95.13           C
ATOM   3483  CG  ARG A 428       6.183   3.703  60.823  1.00 95.13           C
ATOM   3484  CD  ARG A 428       6.923   3.162  59.597  1.00 95.13           C
ATOM   3485  NE  ARG A 428       6.787   1.678  59.599  1.00 95.13           N
ATOM   3486  CZ  ARG A 428       5.669   1.091  59.080  1.00 95.13           C
ATOM   3487  NH1 ARG A 428       4.647   1.866  58.613  1.00 95.13           N
ATOM   3488  NH2 ARG A 428       5.576  -0.270  59.026  1.00 95.13           N
ATOM   3489  C   ARG A 428       7.560   7.117  61.956  1.00 95.13           C
ATOM   3490  O   ARG A 428       8.482   7.582  61.286  1.00 95.13           O
ATOM   3491  N   GLN A 429       6.724   7.907  62.652  1.00 47.77           N
ATOM   3492  CA  GLN A 429       6.874   9.335  62.626  1.00 47.77           C
ATOM   3493  CB  GLN A 429       5.758  10.084  63.380  1.00 47.77           C
ATOM   3494  CG  GLN A 429       4.387   9.971  62.708  1.00 47.77           C
ATOM   3495  CD  GLN A 429       3.389  10.810  63.498  1.00 47.77           C
ATOM   3496  OE1 GLN A 429       3.617  11.144  64.660  1.00 47.77           O
ATOM   3497  NE2 GLN A 429       2.249  11.166  62.847  1.00 47.77           N
ATOM   3498  C   GLN A 429       8.177   9.711  63.262  1.00 47.77           C
ATOM   3499  O   GLN A 429       8.834  10.655  62.825  1.00 47.77           O
ATOM   3500  N   GLU A 430       8.569   9.015  64.347  1.00 63.85           N
ATOM   3501  CA  GLU A 430       9.802   9.353  65.000  1.00 63.85           C
ATOM   3502  CB  GLU A 430      10.006   8.668  66.361  1.00 63.85           C
ATOM   3503  CG  GLU A 430      10.244   7.162  66.270  1.00 63.85           C
ATOM   3504  CD  GLU A 430      10.674   6.694  67.651  1.00 63.85           C
ATOM   3505  OE1 GLU A 430      10.469   7.468  68.625  1.00 63.85           O
ATOM   3506  OE2 GLU A 430      11.214   5.561  67.751  1.00 63.85           O
ATOM   3507  C   GLU A 430      10.963   8.976  64.130  1.00 63.85           C
ATOM   3508  O   GLU A 430      11.940   9.718  64.047  1.00 63.85           O
ATOM   3509  N   ARG A 431      10.892   7.811  63.456  1.00130.20           N
ATOM   3510  CA  ARG A 431      11.997   7.369  62.648  1.00130.20           C
ATOM   3511  CB  ARG A 431      11.791   5.979  62.008  1.00130.20           C
ATOM   3512  CG  ARG A 431      10.619   5.895  61.026  1.00130.20           C
ATOM   3513  CD  ARG A 431      10.327   4.481  60.517  1.00130.20           C
ATOM   3514  NE  ARG A 431      10.109   3.614  61.709  1.00130.20           N
ATOM   3515  CZ  ARG A 431       9.826   2.288  61.556  1.00130.20           C
ATOM   3516  NH1 ARG A 431       9.652   1.763  60.308  1.00130.20           N
ATOM   3517  NH2 ARG A 431       9.729   1.481  62.653  1.00130.20           N
ATOM   3518  C   ARG A 431      12.194   8.352  61.538  1.00130.20           C
ATOM   3519  O   ARG A 431      13.322   8.690  61.184  1.00130.20           O
ATOM   3520  N   PHE A 432      11.080   8.849  60.974  1.00 90.54           N
ATOM   3521  CA  PHE A 432      11.106   9.761  59.869  1.00 90.54           C
ATOM   3522  CB  PHE A 432       9.686  10.161  59.433  1.00 90.54           C
ATOM   3523  CG  PHE A 432       9.794  11.100  58.284  1.00 90.54           C
ATOM   3524  CD1 PHE A 432       9.895  12.456  58.492  1.00 90.54           C
ATOM   3525  CD2 PHE A 432       9.799  10.619  56.995  1.00 90.54           C
ATOM   3526  CE1 PHE A 432       9.995  13.320  57.428  1.00 90.54           C
ATOM   3527  CE2 PHE A 432       9.897  11.479  55.928  1.00 90.54           C
ATOM   3528  CZ  PHE A 432       9.993  12.832  56.145  1.00 90.54           C
ATOM   3529  C   PHE A 432      11.814  11.016  60.284  1.00 90.54           C
ATOM   3530  O   PHE A 432      12.636  11.547  59.538  1.00 90.54           O
ATOM   3531  N   ILE A 433      11.507  11.530  61.489  1.00 37.66           N
ATOM   3532  CA  ILE A 433      12.094  12.764  61.928  1.00 37.66           C
ATOM   3533  CB  ILE A 433      11.525  13.258  63.224  1.00 37.66           C
ATOM   3534  CG1 ILE A 433      10.019  13.525  63.060  1.00 37.66           C
ATOM   3535  CG2 ILE A 433      12.318  14.504  63.655  1.00 37.66           C
ATOM   3536  CD1 ILE A 433       9.306  13.849  64.369  1.00 37.66           C
ATOM   3537  C   ILE A 433      13.573  12.606  62.094  1.00 37.66           C
ATOM   3538  O   ILE A 433      14.341  13.453  61.643  1.00 37.66           O
ATOM   3539  N   GLN A 434      14.024  11.509  62.728  1.00115.88           N
ATOM   3540  CA  GLN A 434      15.430  11.346  62.967  1.00115.88           C
ATOM   3541  CB  GLN A 434      15.770  10.065  63.743  1.00115.88           C
ATOM   3542  CG  GLN A 434      17.272   9.767  63.776  1.00115.88           C
ATOM   3543  CD  GLN A 434      17.966  10.833  64.611  1.00115.88           C
ATOM   3544  OE1 GLN A 434      17.326  11.726  65.163  1.00115.88           O
ATOM   3545  NE2 GLN A 434      19.320  10.742  64.705  1.00115.88           N
ATOM   3546  C   GLN A 434      16.168  11.263  61.669  1.00115.88           C
ATOM   3547  O   GLN A 434      17.255  11.820  61.532  1.00115.88           O
ATOM   3548  N   ARG A 435      15.612  10.537  60.685  1.00 76.97           N
ATOM   3549  CA  ARG A 435      16.274  10.354  59.424  1.00 76.97           C
ATOM   3550  CB  ARG A 435      15.522   9.362  58.522  1.00 76.97           C
ATOM   3551  CG  ARG A 435      15.459   7.970  59.147  1.00 76.97           C
ATOM   3552  CD  ARG A 435      16.808   7.250  59.121  1.00 76.97           C
ATOM   3553  NE  ARG A 435      16.736   6.117  60.084  1.00 76.97           N
ATOM   3554  CZ  ARG A 435      17.098   6.327  61.384  1.00 76.97           C
ATOM   3555  NH1 ARG A 435      17.481   7.573  61.787  1.00 76.97           N
ATOM   3556  NH2 ARG A 435      17.084   5.296  62.278  1.00 76.97           N
ATOM   3557  C   ARG A 435      16.390  11.656  58.689  1.00 76.97           C
ATOM   3558  O   ARG A 435      17.451  11.977  58.153  1.00 76.97           O
ATOM   3559  N   VAL A 436      15.301  12.448  58.647  1.00 44.73           N
ATOM   3560  CA  VAL A 436      15.325  13.683  57.912  1.00 44.73           C
ATOM   3561  CB  VAL A 436      14.002  14.387  57.844  1.00 44.73           C
ATOM   3562  CG1 VAL A 436      14.221  15.743  57.149  1.00 44.73           C
ATOM   3563  CG2 VAL A 436      12.997  13.487  57.106  1.00 44.73           C
ATOM   3564  C   VAL A 436      16.294  14.630  58.535  1.00 44.73           C
ATOM   3565  O   VAL A 436      17.023  15.324  57.828  1.00 44.73           O
ATOM   3566  N   VAL A 437      16.324  14.701  59.878  1.00 38.42           N
ATOM   3567  CA  VAL A 437      17.210  15.622  60.529  1.00 38.42           C
ATOM   3568  CB  VAL A 437      17.050  15.647  62.020  1.00 38.42           C
ATOM   3569  CG1 VAL A 437      18.150  16.548  62.608  1.00 38.42           C
ATOM   3570  CG2 VAL A 437      15.625  16.128  62.350  1.00 38.42           C
ATOM   3571  C   VAL A 437      18.621  15.246  60.214  1.00 38.42           C
ATOM   3572  O   VAL A 437      19.439  16.089  59.852  1.00 38.42           O
ATOM   3573  N   ASP A 438      18.923  13.943  60.288  1.00 42.06           N
ATOM   3574  CA  ASP A 438      20.252  13.457  60.078  1.00 42.06           C
ATOM   3575  CB  ASP A 438      20.267  11.917  60.086  1.00 42.06           C
ATOM   3576  CG  ASP A 438      21.700  11.419  60.006  1.00 42.06           C
ATOM   3577  OD1 ASP A 438      22.624  12.274  60.001  1.00 42.06           O
ATOM   3578  OD2 ASP A 438      21.887  10.174  59.947  1.00 42.06           O
ATOM   3579  C   ASP A 438      20.688  13.903  58.720  1.00 42.06           C
ATOM   3580  O   ASP A 438      21.820  14.348  58.536  1.00 42.06           O
ATOM   3581  N   ALA A 439      19.792  13.766  57.725  1.00 49.55           N
ATOM   3582  CA  ALA A 439      20.082  14.123  56.367  1.00 49.55           C
ATOM   3583  CB  ALA A 439      18.980  13.680  55.392  1.00 49.55           C
ATOM   3584  C   ALA A 439      20.239  15.603  56.200  1.00 49.55           C
ATOM   3585  O   ALA A 439      21.169  16.049  55.536  1.00 49.55           O
ATOM   3586  N   LEU A 440      19.331  16.399  56.798  1.00125.22           N
ATOM   3587  CA  LEU A 440      19.292  17.833  56.665  1.00125.22           C
ATOM   3588  CB  LEU A 440      17.986  18.441  57.196  1.00125.22           C
ATOM   3589  CG  LEU A 440      16.804  18.306  56.213  1.00125.22           C
ATOM   3590  CD1 LEU A 440      16.871  19.371  55.116  1.00125.22           C
ATOM   3591  CD2 LEU A 440      16.702  16.901  55.606  1.00125.22           C
ATOM   3592  C   LEU A 440      20.457  18.486  57.344  1.00125.22           C
ATOM   3593  O   LEU A 440      20.837  19.606  56.999  1.00125.22           O
ATOM   3594  N   SER A 441      21.025  17.840  58.375  1.00 80.74           N
ATOM   3595  CA  SER A 441      22.132  18.444  59.057  1.00 80.74           C
ATOM   3596  CB  SER A 441      22.671  17.587  60.217  1.00 80.74           C
ATOM   3597  OG  SER A 441      23.285  16.409  59.716  1.00 80.74           O
ATOM   3598  C   SER A 441      23.250  18.636  58.080  1.00 80.74           C
ATOM   3599  O   SER A 441      24.024  19.585  58.196  1.00 80.74           O
ATOM   3600  N   ASP A 442      23.376  17.717  57.104  1.00154.62           N
ATOM   3601  CA  ASP A 442      24.430  17.789  56.131  1.00154.62           C
ATOM   3602  CB  ASP A 442      24.912  16.426  55.579  1.00154.62           C
ATOM   3603  CG  ASP A 442      23.808  15.644  54.904  1.00154.62           C
ATOM   3604  OD1 ASP A 442      23.200  16.203  53.961  1.00154.62           O
ATOM   3605  OD2 ASP A 442      23.579  14.469  55.299  1.00154.62           O
ATOM   3606  C   ASP A 442      24.229  18.852  55.070  1.00154.62           C
ATOM   3607  O   ASP A 442      25.214  19.184  54.412  1.00154.62           O
ATOM   3608  N   PRO A 443      23.061  19.395  54.781  1.00131.50           N
ATOM   3609  CA  PRO A 443      23.042  20.455  53.810  1.00131.50           C
ATOM   3610  CD  PRO A 443      21.874  18.590  54.605  1.00131.50           C
ATOM   3611  CB  PRO A 443      21.588  20.638  53.358  1.00131.50           C
ATOM   3612  CG  PRO A 443      20.800  19.595  54.170  1.00131.50           C
ATOM   3613  C   PRO A 443      23.731  21.696  54.286  1.00131.50           C
ATOM   3614  O   PRO A 443      23.583  22.075  55.447  1.00131.50           O
ATOM   3615  N   ARG A 444      24.550  22.279  53.390  1.00150.73           N
ATOM   3616  CA  ARG A 444      25.359  23.448  53.589  1.00150.73           C
ATOM   3617  CB  ARG A 444      26.561  23.494  52.631  1.00150.73           C
ATOM   3618  CG  ARG A 444      27.556  22.343  52.826  1.00150.73           C
ATOM   3619  CD  ARG A 444      26.990  20.957  52.505  1.00150.73           C
ATOM   3620  NE  ARG A 444      28.140  20.012  52.424  1.00150.73           N
ATOM   3621  CZ  ARG A 444      28.692  19.750  51.204  1.00150.73           C
ATOM   3622  NH1 ARG A 444      28.149  20.316  50.087  1.00150.73           N
ATOM   3623  NH2 ARG A 444      29.778  18.931  51.095  1.00150.73           N
ATOM   3624  C   ARG A 444      24.609  24.749  53.483  1.00150.73           C
ATOM   3625  O   ARG A 444      25.022  25.731  54.100  1.00150.73           O
ATOM   3626  N   ILE A 445      23.519  24.826  52.682  1.00103.24           N
ATOM   3627  CA  ILE A 445      22.922  26.121  52.469  1.00103.24           C
ATOM   3628  CB  ILE A 445      22.647  26.468  51.031  1.00103.24           C
ATOM   3629  CG1 ILE A 445      22.385  27.981  50.908  1.00103.24           C
ATOM   3630  CG2 ILE A 445      21.487  25.597  50.524  1.00103.24           C
ATOM   3631  CD1 ILE A 445      22.433  28.515  49.474  1.00103.24           C
ATOM   3632  C   ILE A 445      21.638  26.227  53.228  1.00103.24           C
ATOM   3633  O   ILE A 445      20.800  25.329  53.205  1.00103.24           O
ATOM   3634  N   THR A 446      21.465  27.360  53.935  1.00101.99           N
ATOM   3635  CA  THR A 446      20.341  27.571  54.800  1.00101.99           C
ATOM   3636  CB  THR A 446      20.460  28.825  55.621  1.00101.99           C
ATOM   3637  OG1 THR A 446      19.521  28.812  56.688  1.00101.99           O
ATOM   3638  CG2 THR A 446      20.205  30.039  54.711  1.00101.99           C
ATOM   3639  C   THR A 446      19.054  27.633  54.026  1.00101.99           C
ATOM   3640  O   THR A 446      18.039  27.098  54.469  1.00101.99           O
ATOM   3641  N   HIS A 447      19.058  28.261  52.837  1.00 70.18           N
ATOM   3642  CA  HIS A 447      17.843  28.447  52.091  1.00 70.18           C
ATOM   3643  ND1 HIS A 447      16.188  30.799  50.202  1.00 70.18           N
ATOM   3644  CG  HIS A 447      16.833  29.592  50.041  1.00 70.18           C
ATOM   3645  CB  HIS A 447      18.086  29.195  50.766  1.00 70.18           C
ATOM   3646  NE2 HIS A 447      15.026  29.657  48.690  1.00 70.18           N
ATOM   3647  CD2 HIS A 447      16.109  28.908  49.114  1.00 70.18           C
ATOM   3648  CE1 HIS A 447      15.115  30.785  49.371  1.00 70.18           C
ATOM   3649  C   HIS A 447      17.234  27.110  51.778  1.00 70.18           C
ATOM   3650  O   HIS A 447      16.018  26.941  51.869  1.00 70.18           O
ATOM   3651  N   GLU A 448      18.059  26.117  51.397  1.00 82.52           N
ATOM   3652  CA  GLU A 448      17.535  24.824  51.055  1.00 82.52           C
ATOM   3653  CB  GLU A 448      18.602  23.860  50.519  1.00 82.52           C
ATOM   3654  CG  GLU A 448      19.655  23.481  51.554  1.00 82.52           C
ATOM   3655  CD  GLU A 448      20.677  22.597  50.862  1.00 82.52           C
ATOM   3656  OE1 GLU A 448      20.258  21.783  49.997  1.00 82.52           O
ATOM   3657  OE2 GLU A 448      21.888  22.722  51.185  1.00 82.52           O
ATOM   3658  C   GLU A 448      16.906  24.197  52.268  1.00 82.52           C
ATOM   3659  O   GLU A 448      15.854  23.569  52.166  1.00 82.52           O
ATOM   3660  N   ILE A 449      17.532  24.344  53.454  1.00 97.43           N
ATOM   3661  CA  ILE A 449      17.003  23.763  54.661  1.00 97.43           C
ATOM   3662  CB  ILE A 449      17.846  24.049  55.872  1.00 97.43           C
ATOM   3663  CG1 ILE A 449      19.187  23.307  55.794  1.00 97.43           C
ATOM   3664  CG2 ILE A 449      17.017  23.710  57.121  1.00 97.43           C
ATOM   3665  CD1 ILE A 449      19.024  21.788  55.821  1.00 97.43           C
ATOM   3666  C   ILE A 449      15.662  24.367  54.953  1.00 97.43           C
ATOM   3667  O   ILE A 449      14.695  23.654  55.211  1.00 97.43           O
ATOM   3668  N   ARG A 450      15.560  25.705  54.888  1.00109.84           N
ATOM   3669  CA  ARG A 450      14.330  26.369  55.208  1.00109.84           C
ATOM   3670  CB  ARG A 450      14.428  27.901  55.104  1.00109.84           C
ATOM   3671  CG  ARG A 450      13.121  28.624  55.442  1.00109.84           C
ATOM   3672  CD  ARG A 450      12.188  28.775  54.241  1.00109.84           C
ATOM   3673  NE  ARG A 450      12.944  29.528  53.203  1.00109.84           N
ATOM   3674  CZ  ARG A 450      12.385  30.611  52.588  1.00109.84           C
ATOM   3675  NH1 ARG A 450      11.122  31.013  52.916  1.00109.84           N
ATOM   3676  NH2 ARG A 450      13.096  31.291  51.641  1.00109.84           N
ATOM   3677  C   ARG A 450      13.273  25.899  54.259  1.00109.84           C
ATOM   3678  O   ARG A 450      12.132  25.663  54.658  1.00109.84           O
ATOM   3679  N   SER A 451      13.630  25.743  52.970  1.00 66.81           N
ATOM   3680  CA  SER A 451      12.673  25.322  51.988  1.00 66.81           C
ATOM   3681  CB  SER A 451      13.238  25.318  50.558  1.00 66.81           C
ATOM   3682  OG  SER A 451      12.239  24.887  49.645  1.00 66.81           O
ATOM   3683  C   SER A 451      12.225  23.923  52.294  1.00 66.81           C
ATOM   3684  O   SER A 451      11.047  23.603  52.138  1.00 66.81           O
ATOM   3685  N   ILE A 452      13.145  23.039  52.737  1.00135.44           N
ATOM   3686  CA  ILE A 452      12.716  21.690  52.979  1.00135.44           C
ATOM   3687  CB  ILE A 452      13.814  20.695  53.259  1.00135.44           C
ATOM   3688  CG1 ILE A 452      13.235  19.270  53.199  1.00135.44           C
ATOM   3689  CG2 ILE A 452      14.452  21.000  54.622  1.00135.44           C
ATOM   3690  CD1 ILE A 452      12.684  18.886  51.827  1.00135.44           C
ATOM   3691  C   ILE A 452      11.738  21.669  54.110  1.00135.44           C
ATOM   3692  O   ILE A 452      10.702  21.012  54.022  1.00135.44           O
ATOM   3693  N   TRP A 453      12.029  22.412  55.196  1.00 73.76           N
ATOM   3694  CA  TRP A 453      11.161  22.396  56.339  1.00 73.76           C
ATOM   3695  CB  TRP A 453      11.748  23.132  57.554  1.00 73.76           C
ATOM   3696  CG  TRP A 453      13.047  22.506  58.008  1.00 73.76           C
ATOM   3697  CD2 TRP A 453      13.330  21.101  57.903  1.00 73.76           C
ATOM   3698  CD1 TRP A 453      14.185  23.091  58.483  1.00 73.76           C
ATOM   3699  NE1 TRP A 453      15.150  22.136  58.703  1.00 73.76           N
ATOM   3700  CE2 TRP A 453      14.639  20.908  58.342  1.00 73.76           C
ATOM   3701  CE3 TRP A 453      12.571  20.058  57.457  1.00 73.76           C
ATOM   3702  CZ2 TRP A 453      15.206  19.664  58.343  1.00 73.76           C
ATOM   3703  CZ3 TRP A 453      13.141  18.804  57.480  1.00 73.76           C
ATOM   3704  CH2 TRP A 453      14.431  18.610  57.917  1.00 73.76           C
ATOM   3705  C   TRP A 453       9.833  22.976  55.961  1.00 73.76           C
ATOM   3706  O   TRP A 453       8.795  22.497  56.411  1.00 73.76           O
ATOM   3707  N   VAL A 454       9.821  24.031  55.126  1.00 30.07           N
ATOM   3708  CA  VAL A 454       8.581  24.631  54.716  1.00 30.07           C
ATOM   3709  CB  VAL A 454       8.784  25.854  53.868  1.00 30.07           C
ATOM   3710  CG1 VAL A 454       7.413  26.341  53.370  1.00 30.07           C
ATOM   3711  CG2 VAL A 454       9.549  26.898  54.701  1.00 30.07           C
ATOM   3712  C   VAL A 454       7.770  23.639  53.933  1.00 30.07           C
ATOM   3713  O   VAL A 454       6.559  23.534  54.119  1.00 30.07           O
ATOM   3714  N   SER A 455       8.417  22.868  53.037  1.00 76.11           N
ATOM   3715  CA  SER A 455       7.705  21.921  52.222  1.00 76.11           C
ATOM   3716  CB  SER A 455       8.648  21.099  51.326  1.00 76.11           C
ATOM   3717  OG  SER A 455       7.910  20.149  50.574  1.00 76.11           O
ATOM   3718  C   SER A 455       7.000  20.955  53.117  1.00 76.11           C
ATOM   3719  O   SER A 455       5.812  20.683  52.939  1.00 76.11           O
ATOM   3720  N   TYR A 456       7.723  20.377  54.093  1.00 85.10           N
ATOM   3721  CA  TYR A 456       7.074  19.436  54.958  1.00 85.10           C
ATOM   3722  CB  TYR A 456       8.005  18.654  55.902  1.00 85.10           C
ATOM   3723  CG  TYR A 456       8.927  17.785  55.119  1.00 85.10           C
ATOM   3724  CD1 TYR A 456       8.460  16.662  54.474  1.00 85.10           C
ATOM   3725  CD2 TYR A 456      10.259  18.111  55.012  1.00 85.10           C
ATOM   3726  CE1 TYR A 456       9.317  15.865  53.751  1.00 85.10           C
ATOM   3727  CE2 TYR A 456      11.120  17.316  54.292  1.00 85.10           C
ATOM   3728  CZ  TYR A 456      10.649  16.190  53.661  1.00 85.10           C
ATOM   3729  OH  TYR A 456      11.530  15.375  52.921  1.00 85.10           O
ATOM   3730  C   TYR A 456       6.087  20.109  55.862  1.00 85.10           C
ATOM   3731  O   TYR A 456       4.978  19.621  56.073  1.00 85.10           O
ATOM   3732  N   TRP A 457       6.510  21.235  56.456  1.00184.60           N
ATOM   3733  CA  TRP A 457       5.796  21.868  57.527  1.00184.60           C
ATOM   3734  CB  TRP A 457       6.630  23.034  58.115  1.00184.60           C
ATOM   3735  CG  TRP A 457       6.010  23.807  59.263  1.00184.60           C
ATOM   3736  CD2 TRP A 457       5.653  25.205  59.252  1.00184.60           C
ATOM   3737  CD1 TRP A 457       5.728  23.360  60.515  1.00184.60           C
ATOM   3738  NE1 TRP A 457       5.205  24.368  61.282  1.00184.60           N
ATOM   3739  CE2 TRP A 457       5.158  25.513  60.520  1.00184.60           C
ATOM   3740  CE3 TRP A 457       5.738  26.154  58.274  1.00184.60           C
ATOM   3741  CZ2 TRP A 457       4.738  26.774  60.832  1.00184.60           C
ATOM   3742  CZ3 TRP A 457       5.307  27.423  58.592  1.00184.60           C
ATOM   3743  CH2 TRP A 457       4.816  27.729  59.844  1.00184.60           C
ATOM   3744  C   TRP A 457       4.474  22.431  57.222  1.00184.60           C
ATOM   3745  O   TRP A 457       3.440  21.774  57.364  1.00184.60           O
ATOM   3746  N   SER A 458       4.523  23.661  56.691  1.00 77.31           N
ATOM   3747  CA  SER A 458       3.334  24.424  56.572  1.00 77.31           C
ATOM   3748  CB  SER A 458       3.597  25.822  55.977  1.00 77.31           C
ATOM   3749  OG  SER A 458       2.424  26.620  56.028  1.00 77.31           O
ATOM   3750  C   SER A 458       2.469  23.664  55.661  1.00 77.31           C
ATOM   3751  O   SER A 458       1.284  23.460  55.918  1.00 77.31           O
ATOM   3752  N   GLN A 459       3.067  23.200  54.558  1.00148.98           N
ATOM   3753  CA  GLN A 459       2.188  22.575  53.646  1.00148.98           C
ATOM   3754  CB  GLN A 459       2.793  22.509  52.246  1.00148.98           C
ATOM   3755  CG  GLN A 459       3.028  23.883  51.617  1.00148.98           C
ATOM   3756  CD  GLN A 459       1.675  24.565  51.502  1.00148.98           C
ATOM   3757  OE1 GLN A 459       0.695  23.962  51.070  1.00148.98           O
ATOM   3758  NE2 GLN A 459       1.616  25.859  51.916  1.00148.98           N
ATOM   3759  C   GLN A 459       1.723  21.191  54.012  1.00148.98           C
ATOM   3760  O   GLN A 459       0.527  20.980  54.200  1.00148.98           O
ATOM   3761  N   ALA A 460       2.656  20.217  54.145  1.00 56.41           N
ATOM   3762  CA  ALA A 460       2.252  18.839  54.311  1.00 56.41           C
ATOM   3763  CB  ALA A 460       3.423  17.856  54.137  1.00 56.41           C
ATOM   3764  C   ALA A 460       1.644  18.569  55.647  1.00 56.41           C
ATOM   3765  O   ALA A 460       0.529  18.058  55.747  1.00 56.41           O
ATOM   3766  N   ASP A 461       2.368  18.936  56.716  1.00 88.80           N
ATOM   3767  CA  ASP A 461       1.911  18.681  58.048  1.00 88.80           C
ATOM   3768  CB  ASP A 461       2.229  17.252  58.526  1.00 88.80           C
ATOM   3769  CG  ASP A 461       1.600  17.039  59.895  1.00 88.80           C
ATOM   3770  OD1 ASP A 461       2.278  17.359  60.909  1.00 88.80           O
ATOM   3771  OD2 ASP A 461       0.432  16.563  59.950  1.00 88.80           O
ATOM   3772  C   ASP A 461       2.619  19.661  58.928  1.00 88.80           C
ATOM   3773  O   ASP A 461       3.848  19.725  58.942  1.00 88.80           O
ATOM   3774  N   LYS A 462       1.839  20.466  59.673  1.00153.66           N
ATOM   3775  CA  LYS A 462       2.362  21.515  60.503  1.00153.66           C
ATOM   3776  CB  LYS A 462       1.257  22.346  61.170  1.00153.66           C
ATOM   3777  CG  LYS A 462       0.387  21.534  62.133  1.00153.66           C
ATOM   3778  CD  LYS A 462      -0.359  20.385  61.451  1.00153.66           C
ATOM   3779  CE  LYS A 462      -1.390  19.692  62.345  1.00153.66           C
ATOM   3780  NZ  LYS A 462      -0.710  18.861  63.366  1.00153.66           N
ATOM   3781  C   LYS A 462       3.209  20.977  61.616  1.00153.66           C
ATOM   3782  O   LYS A 462       4.279  21.508  61.899  1.00153.66           O
ATOM   3783  N   SER A 463       2.765  19.910  62.298  1.00 35.67           N
ATOM   3784  CA  SER A 463       3.512  19.459  63.440  1.00 35.67           C
ATOM   3785  CB  SER A 463       2.809  18.341  64.228  1.00 35.67           C
ATOM   3786  OG  SER A 463       2.721  17.161  63.444  1.00 35.67           O
ATOM   3787  C   SER A 463       4.852  18.944  63.020  1.00 35.67           C
ATOM   3788  O   SER A 463       5.849  19.175  63.703  1.00 35.67           O
ATOM   3789  N   LEU A 464       4.921  18.225  61.886  1.00 60.86           N
ATOM   3790  CA  LEU A 464       6.186  17.680  61.489  1.00 60.86           C
ATOM   3791  CB  LEU A 464       6.114  16.739  60.275  1.00 60.86           C
ATOM   3792  CG  LEU A 464       7.492  16.168  59.888  1.00 60.86           C
ATOM   3793  CD1 LEU A 464       8.081  15.316  61.025  1.00 60.86           C
ATOM   3794  CD2 LEU A 464       7.437  15.414  58.550  1.00 60.86           C
ATOM   3795  C   LEU A 464       7.117  18.807  61.171  1.00 60.86           C
ATOM   3796  O   LEU A 464       8.298  18.764  61.510  1.00 60.86           O
ATOM   3797  N   GLY A 465       6.601  19.861  60.515  1.00 33.18           N
ATOM   3798  CA  GLY A 465       7.418  20.979  60.149  1.00 33.18           C
ATOM   3799  C   GLY A 465       7.951  21.629  61.388  1.00 33.18           C
ATOM   3800  O   GLY A 465       9.082  22.108  61.398  1.00 33.18           O
ATOM   3801  N   MET A 466       7.130  21.713  62.452  1.00107.73           N
ATOM   3802  CA  MET A 466       7.553  22.331  63.680  1.00107.73           C
ATOM   3803  CB  MET A 466       6.439  22.385  64.734  1.00107.73           C
ATOM   3804  CG  MET A 466       6.887  23.035  66.041  1.00107.73           C
ATOM   3805  SD  MET A 466       5.618  23.048  67.339  1.00107.73           S
ATOM   3806  CE  MET A 466       6.694  23.845  68.566  1.00107.73           C
ATOM   3807  C   MET A 466       8.670  21.548  64.301  1.00107.73           C
ATOM   3808  O   MET A 466       9.648  22.126  64.774  1.00107.73           O
ATOM   3809  N   LYS A 467       8.553  20.206  64.324  1.00 59.61           N
ATOM   3810  CA  LYS A 467       9.555  19.403  64.968  1.00 59.61           C
ATOM   3811  CB  LYS A 467       9.210  17.903  65.012  1.00 59.61           C
ATOM   3812  CG  LYS A 467       8.124  17.542  66.030  1.00 59.61           C
ATOM   3813  CD  LYS A 467       7.671  16.082  65.946  1.00 59.61           C
ATOM   3814  CE  LYS A 467       6.794  15.631  67.119  1.00 59.61           C
ATOM   3815  NZ  LYS A 467       5.364  15.686  66.742  1.00 59.61           N
ATOM   3816  C   LYS A 467      10.857  19.552  64.251  1.00 59.61           C
ATOM   3817  O   LYS A 467      11.905  19.679  64.881  1.00 59.61           O
ATOM   3818  N   LEU A 468      10.816  19.550  62.909  1.00 63.63           N
ATOM   3819  CA  LEU A 468      11.993  19.662  62.097  1.00 63.63           C
ATOM   3820  CB  LEU A 468      11.645  19.596  60.601  1.00 63.63           C
ATOM   3821  CG  LEU A 468      11.070  18.227  60.189  1.00 63.63           C
ATOM   3822  CD1 LEU A 468      10.553  18.231  58.741  1.00 63.63           C
ATOM   3823  CD2 LEU A 468      12.097  17.108  60.439  1.00 63.63           C
ATOM   3824  C   LEU A 468      12.631  20.986  62.374  1.00 63.63           C
ATOM   3825  O   LEU A 468      13.853  21.090  62.446  1.00 63.63           O
ATOM   3826  N   ALA A 469      11.810  22.037  62.539  1.00 37.14           N
ATOM   3827  CA  ALA A 469      12.319  23.358  62.766  1.00 37.14           C
ATOM   3828  CB  ALA A 469      11.199  24.405  62.878  1.00 37.14           C
ATOM   3829  C   ALA A 469      13.101  23.395  64.043  1.00 37.14           C
ATOM   3830  O   ALA A 469      14.171  23.998  64.094  1.00 37.14           O
ATOM   3831  N   SER A 470      12.589  22.759  65.113  1.00 34.66           N
ATOM   3832  CA  SER A 470      13.260  22.808  66.382  1.00 34.66           C
ATOM   3833  CB  SER A 470      12.440  22.155  67.505  1.00 34.66           C
ATOM   3834  OG  SER A 470      12.336  20.759  67.270  1.00 34.66           O
ATOM   3835  C   SER A 470      14.569  22.078  66.317  1.00 34.66           C
ATOM   3836  O   SER A 470      15.598  22.586  66.759  1.00 34.66           O
ATOM   3837  N   ARG A 471      14.559  20.858  65.752  1.00143.06           N
ATOM   3838  CA  ARG A 471      15.723  20.015  65.725  1.00143.06           C
ATOM   3839  CB  ARG A 471      15.451  18.634  65.097  1.00143.06           C
ATOM   3840  CG  ARG A 471      14.545  17.725  65.927  1.00143.06           C
ATOM   3841  CD  ARG A 471      15.297  16.791  66.883  1.00143.06           C
ATOM   3842  NE  ARG A 471      15.729  17.595  68.061  1.00143.06           N
ATOM   3843  CZ  ARG A 471      15.513  17.123  69.324  1.00143.06           C
ATOM   3844  NH1 ARG A 471      14.898  15.918  69.507  1.00143.06           N
ATOM   3845  NH2 ARG A 471      15.898  17.860  70.406  1.00143.06           N
ATOM   3846  C   ARG A 471      16.817  20.622  64.904  1.00143.06           C
ATOM   3847  O   ARG A 471      17.995  20.481  65.227  1.00143.06           O
ATOM   3848  N   LEU A 472      16.452  21.240  63.772  1.00171.00           N
ATOM   3849  CA  LEU A 472      17.402  21.776  62.834  1.00171.00           C
ATOM   3850  CB  LEU A 472      16.858  21.958  61.407  1.00171.00           C
ATOM   3851  CG  LEU A 472      16.816  20.636  60.615  1.00171.00           C
ATOM   3852  CD1 LEU A 472      18.235  20.065  60.456  1.00171.00           C
ATOM   3853  CD2 LEU A 472      15.837  19.620  61.221  1.00171.00           C
ATOM   3854  C   LEU A 472      18.025  23.033  63.268  1.00171.00           C
ATOM   3855  O   LEU A 472      19.136  23.356  62.838  1.00171.00           O
ATOM   3856  N   ASN A 473      17.243  23.766  64.075  1.00144.13           N
ATOM   3857  CA  ASN A 473      17.489  25.041  64.639  1.00144.13           C
ATOM   3858  CB  ASN A 473      18.923  25.189  65.184  1.00144.13           C
ATOM   3859  CG  ASN A 473      19.071  24.235  66.362  1.00144.13           C
ATOM   3860  OD1 ASN A 473      18.086  23.828  66.974  1.00144.13           O
ATOM   3861  ND2 ASN A 473      20.336  23.868  66.697  1.00144.13           N
ATOM   3862  C   ASN A 473      17.266  26.060  63.571  1.00144.13           C
ATOM   3863  O   ASN A 473      18.146  26.864  63.275  1.00144.13           O
ATOM   3864  N   VAL A 474      16.057  26.057  62.969  1.00126.53           N
ATOM   3865  CA  VAL A 474      15.722  27.070  62.012  1.00126.53           C
ATOM   3866  CB  VAL A 474      15.861  26.653  60.577  1.00126.53           C
ATOM   3867  CG1 VAL A 474      17.354  26.570  60.241  1.00126.53           C
ATOM   3868  CG2 VAL A 474      15.134  25.313  60.382  1.00126.53           C
ATOM   3869  C   VAL A 474      14.303  27.440  62.254  1.00126.53           C
ATOM   3870  O   VAL A 474      13.441  26.569  62.311  1.00126.53           O
ATOM   3871  N   ARG A 475      14.020  28.751  62.370  1.00148.67           N
ATOM   3872  CA  ARG A 475      12.685  29.163  62.695  1.00148.67           C
ATOM   3873  CB  ARG A 475      12.672  30.362  63.657  1.00148.67           C
ATOM   3874  CG  ARG A 475      11.292  30.760  64.174  1.00148.67           C
ATOM   3875  CD  ARG A 475      11.371  31.799  65.292  1.00148.67           C
ATOM   3876  NE  ARG A 475      12.077  32.987  64.737  1.00148.67           N
ATOM   3877  CZ  ARG A 475      12.140  34.143  65.458  1.00148.67           C
ATOM   3878  NH1 ARG A 475      11.570  34.204  66.697  1.00148.67           N
ATOM   3879  NH2 ARG A 475      12.766  35.239  64.939  1.00148.67           N
ATOM   3880  C   ARG A 475      11.981  29.550  61.435  1.00148.67           C
ATOM   3881  O   ARG A 475      12.385  30.468  60.724  1.00148.67           O
ATOM   3882  N   PRO A 476      10.944  28.815  61.134  1.00136.48           N
ATOM   3883  CA  PRO A 476      10.142  29.089  59.975  1.00136.48           C
ATOM   3884  CD  PRO A 476      10.879  27.413  61.503  1.00136.48           C
ATOM   3885  CB  PRO A 476       9.381  27.800  59.653  1.00136.48           C
ATOM   3886  CG  PRO A 476       9.558  26.918  60.899  1.00136.48           C
ATOM   3887  C   PRO A 476       9.266  30.275  60.151  1.00136.48           C
ATOM   3888  O   PRO A 476       8.775  30.792  59.149  1.00136.48           O
ATOM   3889  N   THR A 477       9.017  30.713  61.396  1.00227.43           N
ATOM   3890  CA  THR A 477       8.177  31.862  61.510  1.00227.43           C
ATOM   3891  CB  THR A 477       7.739  32.168  62.914  1.00227.43           C
ATOM   3892  OG1 THR A 477       6.806  33.239  62.921  1.00227.43           O
ATOM   3893  CG2 THR A 477       8.973  32.539  63.748  1.00227.43           C
ATOM   3894  C   THR A 477       8.985  33.008  61.005  1.00227.43           C
ATOM   3895  O   THR A 477      10.160  33.139  61.341  1.00227.43           O
ATOM   3896  N   MET A 478       8.381  33.861  60.158  1.00 71.47           N
ATOM   3897  CA  MET A 478       9.135  34.969  59.655  1.00 71.47           C
ATOM   3898  CB  MET A 478       8.354  35.925  58.740  1.00 71.47           C
ATOM   3899  CG  MET A 478       8.078  35.379  57.342  1.00 71.47           C
ATOM   3900  SD  MET A 478       7.294  36.579  56.217  1.00 71.47           S
ATOM   3901  CE  MET A 478       8.751  37.656  56.068  1.00 71.47           C
ATOM   3902  C   MET A 478       9.594  35.781  60.855  1.00 71.47           C
ATOM   3903  O   MET A 478       8.719  36.300  61.596  1.00 71.47           O
ATOM   3904  OXT MET A 478      10.834  35.886  61.042  1.00 71.47           O
TER    3905      MET A 478
ATOM   3906  N   PRO B   1      22.898  31.138  30.569  1.00229.53           N
ATOM   3907  CA  PRO B   1      22.351  31.325  31.869  1.00229.53           C
ATOM   3908  CD  PRO B   1      24.129  31.897  30.381  1.00229.53           C
ATOM   3909  CB  PRO B   1      22.669  32.751  32.069  1.00229.53           C
ATOM   3910  CG  PRO B   1      24.088  32.965  31.469  1.00229.53           C
ATOM   3911  C   PRO B   1      21.188  30.874  30.995  1.00229.53           C
ATOM   3912  O   PRO B   1      20.073  31.376  31.013  1.00229.53           O
ATOM   3913  N   TYR B   2      21.588  30.003  30.009  1.00254.34           N
ATOM   3914  CA  TYR B   2      20.889  29.561  28.831  1.00254.34           C
ATOM   3915  CB  TYR B   2      21.692  30.286  27.756  1.00254.34           C
ATOM   3916  CG  TYR B   2      21.328  30.444  26.333  1.00254.34           C
ATOM   3917  CD1 TYR B   2      20.242  31.208  25.964  1.00254.34           C
ATOM   3918  CD2 TYR B   2      22.179  29.952  25.359  1.00254.34           C
ATOM   3919  CE1 TYR B   2      19.982  31.403  24.627  1.00254.34           C
ATOM   3920  CE2 TYR B   2      21.909  30.142  24.024  1.00254.34           C
ATOM   3921  CZ  TYR B   2      20.818  30.895  23.655  1.00254.34           C
ATOM   3922  OH  TYR B   2      20.564  31.125  22.283  1.00254.34           O
ATOM   3923  C   TYR B   2      21.070  28.082  28.601  1.00254.34           C
ATOM   3924  O   TYR B   2      22.096  27.645  28.071  1.00254.34           O
ATOM   3925  N   TRP B   3      20.010  27.286  28.893  1.00162.11           N
ATOM   3926  CA  TRP B   3      19.989  25.872  28.613  1.00162.11           C
ATOM   3927  CB  TRP B   3      18.821  25.014  29.182  1.00162.11           C
ATOM   3928  CG  TRP B   3      18.882  24.389  30.559  1.00162.11           C
ATOM   3929  CD2 TRP B   3      18.934  22.958  30.739  1.00162.11           C
ATOM   3930  CD1 TRP B   3      18.783  24.930  31.809  1.00162.11           C
ATOM   3931  NE1 TRP B   3      18.761  23.933  32.754  1.00162.11           N
ATOM   3932  CE2 TRP B   3      18.853  22.710  32.105  1.00162.11           C
ATOM   3933  CE3 TRP B   3      19.014  21.945  29.826  1.00162.11           C
ATOM   3934  CZ2 TRP B   3      18.856  21.438  32.599  1.00162.11           C
ATOM   3935  CZ3 TRP B   3      19.028  20.657  30.325  1.00162.11           C
ATOM   3936  CH2 TRP B   3      18.955  20.412  31.687  1.00162.11           C
ATOM   3937  C   TRP B   3      19.773  25.675  27.170  1.00162.11           C
ATOM   3938  O   TRP B   3      18.976  26.386  26.555  1.00162.11           O
ATOM   3939  N   THR B   4      20.468  24.664  26.610  1.00 61.69           N
ATOM   3940  CA  THR B   4      20.315  24.336  25.227  1.00 61.69           C
ATOM   3941  CB  THR B   4      21.415  24.870  24.348  1.00 61.69           C
ATOM   3942  OG1 THR B   4      22.636  24.219  24.660  1.00 61.69           O
ATOM   3943  CG2 THR B   4      21.542  26.380  24.602  1.00 61.69           C
ATOM   3944  C   THR B   4      20.362  22.834  25.070  1.00 61.69           C
ATOM   3945  O   THR B   4      20.778  22.091  25.962  1.00 61.69           O
ATOM   3946  N   THR B   5      19.895  22.365  23.902  1.00135.73           N
ATOM   3947  CA  THR B   5      19.955  20.995  23.509  1.00135.73           C
ATOM   3948  CB  THR B   5      19.031  20.733  22.360  1.00135.73           C
ATOM   3949  OG1 THR B   5      19.052  19.376  21.955  1.00135.73           O
ATOM   3950  CG2 THR B   5      19.492  21.632  21.206  1.00135.73           C
ATOM   3951  C   THR B   5      21.354  20.813  22.994  1.00135.73           C
ATOM   3952  O   THR B   5      22.131  21.764  22.957  1.00135.73           O
ATOM   3953  N   ASN B   6      21.723  19.584  22.596  1.00112.36           N
ATOM   3954  CA  ASN B   6      23.036  19.377  22.054  1.00112.36           C
ATOM   3955  CB  ASN B   6      23.451  17.909  21.935  1.00112.36           C
ATOM   3956  CG  ASN B   6      24.002  17.603  23.311  1.00112.36           C
ATOM   3957  OD1 ASN B   6      24.320  16.462  23.640  1.00112.36           O
ATOM   3958  ND2 ASN B   6      24.124  18.671  24.145  1.00112.36           N
ATOM   3959  C   ASN B   6      23.162  20.056  20.731  1.00112.36           C
ATOM   3960  O   ASN B   6      24.272  20.201  20.215  1.00112.36           O
ATOM   3961  N   SER B   7      22.011  20.355  20.104  1.00 90.39           N
ATOM   3962  CA  SER B   7      21.982  21.076  18.864  1.00 90.39           C
ATOM   3963  CB  SER B   7      20.749  20.795  18.012  1.00 90.39           C
ATOM   3964  OG  SER B   7      20.971  19.611  17.258  1.00 90.39           O
ATOM   3965  C   SER B   7      22.180  22.555  19.017  1.00 90.39           C
ATOM   3966  O   SER B   7      22.343  23.261  18.019  1.00 90.39           O
ATOM   3967  N   GLY B   8      22.172  23.090  20.255  1.00 47.25           N
ATOM   3968  CA  GLY B   8      22.409  24.500  20.420  1.00 47.25           C
ATOM   3969  C   GLY B   8      21.121  25.256  20.392  1.00 47.25           C
ATOM   3970  O   GLY B   8      21.121  26.482  20.269  1.00 47.25           O
ATOM   3971  N   ALA B   9      19.987  24.543  20.486  1.00 69.74           N
ATOM   3972  CA  ALA B   9      18.717  25.206  20.479  1.00 69.74           C
ATOM   3973  CB  ALA B   9      17.587  24.336  19.893  1.00 69.74           C
ATOM   3974  C   ALA B   9      18.365  25.477  21.914  1.00 69.74           C
ATOM   3975  O   ALA B   9      18.405  24.600  22.776  1.00 69.74           O
ATOM   3976  N   PRO B  10      18.002  26.702  22.189  1.00118.89           N
ATOM   3977  CA  PRO B  10      17.661  27.066  23.550  1.00118.89           C
ATOM   3978  CD  PRO B  10      18.590  27.805  21.445  1.00118.89           C
ATOM   3979  CB  PRO B  10      17.663  28.593  23.560  1.00118.89           C
ATOM   3980  CG  PRO B  10      18.659  28.978  22.428  1.00118.89           C
ATOM   3981  C   PRO B  10      16.417  26.399  24.041  1.00118.89           C
ATOM   3982  O   PRO B  10      15.424  26.372  23.310  1.00118.89           O
ATOM   3983  N   VAL B  11      16.443  25.823  25.265  1.00177.03           N
ATOM   3984  CA  VAL B  11      15.204  25.302  25.741  1.00177.03           C
ATOM   3985  CB  VAL B  11      15.055  23.819  25.971  1.00177.03           C
ATOM   3986  CG1 VAL B  11      14.510  23.279  24.658  1.00177.03           C
ATOM   3987  CG2 VAL B  11      16.420  23.200  26.342  1.00177.03           C
ATOM   3988  C   VAL B  11      14.542  26.146  26.760  1.00177.03           C
ATOM   3989  O   VAL B  11      15.082  26.833  27.615  1.00177.03           O
ATOM   3990  N   TYR B  12      13.261  26.181  26.438  1.00278.75           N
ATOM   3991  CA  TYR B  12      12.089  26.793  26.929  1.00278.75           C
ATOM   3992  CB  TYR B  12      11.109  26.373  25.877  1.00278.75           C
ATOM   3993  CG  TYR B  12       9.754  25.833  26.225  1.00278.75           C
ATOM   3994  CD1 TYR B  12       8.906  26.481  27.076  1.00278.75           C
ATOM   3995  CD2 TYR B  12       9.254  24.806  25.416  1.00278.75           C
ATOM   3996  CE1 TYR B  12       7.631  26.004  27.223  1.00278.75           C
ATOM   3997  CE2 TYR B  12       7.965  24.350  25.564  1.00278.75           C
ATOM   3998  CZ  TYR B  12       7.152  24.946  26.492  1.00278.75           C
ATOM   3999  OH  TYR B  12       5.816  24.503  26.668  1.00278.75           O
ATOM   4000  C   TYR B  12      11.594  26.270  28.216  1.00278.75           C
ATOM   4001  O   TYR B  12      11.316  27.025  29.174  1.00278.75           O
ATOM   4002  N   ASN B  13      11.463  24.929  28.264  1.00124.28           N
ATOM   4003  CA  ASN B  13      10.827  24.365  29.409  1.00124.28           C
ATOM   4004  CB  ASN B  13       9.342  24.128  29.126  1.00124.28           C
ATOM   4005  CG  ASN B  13       8.639  23.765  30.416  1.00124.28           C
ATOM   4006  OD1 ASN B  13       8.535  24.545  31.355  1.00124.28           O
ATOM   4007  ND2 ASN B  13       8.068  22.531  30.464  1.00124.28           N
ATOM   4008  C   ASN B  13      11.515  23.063  29.658  1.00124.28           C
ATOM   4009  O   ASN B  13      11.351  22.136  28.863  1.00124.28           O
ATOM   4010  N   ASN B  14      12.289  22.950  30.758  1.00198.02           N
ATOM   4011  CA  ASN B  14      12.931  21.680  31.002  1.00198.02           C
ATOM   4012  CB  ASN B  14      14.381  21.730  31.524  1.00198.02           C
ATOM   4013  CG  ASN B  14      15.306  21.646  30.336  1.00198.02           C
ATOM   4014  OD1 ASN B  14      16.251  22.417  30.210  1.00198.02           O
ATOM   4015  ND2 ASN B  14      15.046  20.648  29.454  1.00198.02           N
ATOM   4016  C   ASN B  14      12.187  20.928  32.066  1.00198.02           C
ATOM   4017  O   ASN B  14      12.770  20.029  32.674  1.00198.02           O
ATOM   4018  N   ASN B  15      10.945  21.367  32.397  1.00127.71           N
ATOM   4019  CA  ASN B  15      10.014  20.727  33.290  1.00127.71           C
ATOM   4020  CB  ASN B  15       9.098  21.728  34.030  1.00127.71           C
ATOM   4021  CG  ASN B  15       9.711  22.236  35.341  1.00127.71           C
ATOM   4022  OD1 ASN B  15       9.303  21.818  36.425  1.00127.71           O
ATOM   4023  ND2 ASN B  15      10.703  23.160  35.248  1.00127.71           N
ATOM   4024  C   ASN B  15       9.073  19.733  32.636  1.00127.71           C
ATOM   4025  O   ASN B  15       8.741  18.721  33.251  1.00127.71           O
ATOM   4026  N   SER B  16       8.558  19.989  31.403  1.00112.70           N
ATOM   4027  CA  SER B  16       7.495  19.111  30.962  1.00112.70           C
ATOM   4028  CB  SER B  16       6.077  19.717  31.077  1.00112.70           C
ATOM   4029  OG  SER B  16       5.901  20.809  30.189  1.00112.70           O
ATOM   4030  C   SER B  16       7.687  18.586  29.578  1.00112.70           C
ATOM   4031  O   SER B  16       8.168  19.266  28.673  1.00112.70           O
ATOM   4032  N   SER B  17       7.290  17.309  29.401  1.00 48.32           N
ATOM   4033  CA  SER B  17       7.383  16.660  28.130  1.00 48.32           C
ATOM   4034  CB  SER B  17       7.275  15.124  28.225  1.00 48.32           C
ATOM   4035  OG  SER B  17       8.327  14.608  29.028  1.00 48.32           O
ATOM   4036  C   SER B  17       6.269  17.159  27.261  1.00 48.32           C
ATOM   4037  O   SER B  17       5.271  17.697  27.739  1.00 48.32           O
ATOM   4038  N   LEU B  18       6.434  17.016  25.929  1.00118.76           N
ATOM   4039  CA  LEU B  18       5.390  17.383  25.016  1.00118.76           C
ATOM   4040  CB  LEU B  18       5.904  17.749  23.614  1.00118.76           C
ATOM   4041  CG  LEU B  18       4.794  17.856  22.555  1.00118.76           C
ATOM   4042  CD1 LEU B  18       3.646  18.741  23.034  1.00118.76           C
ATOM   4043  CD2 LEU B  18       5.361  18.346  21.214  1.00118.76           C
ATOM   4044  C   LEU B  18       4.485  16.203  24.915  1.00118.76           C
ATOM   4045  O   LEU B  18       4.904  15.103  24.561  1.00118.76           O
ATOM   4046  N   THR B  19       3.198  16.409  25.239  1.00 68.91           N
ATOM   4047  CA  THR B  19       2.283  15.311  25.287  1.00 68.91           C
ATOM   4048  CB  THR B  19       1.869  14.990  26.692  1.00 68.91           C
ATOM   4049  OG1 THR B  19       1.347  16.146  27.327  1.00 68.91           O
ATOM   4050  CG2 THR B  19       3.102  14.478  27.457  1.00 68.91           C
ATOM   4051  C   THR B  19       1.064  15.632  24.490  1.00 68.91           C
ATOM   4052  O   THR B  19       0.739  16.795  24.246  1.00 68.91           O
ATOM   4053  N   VAL B  20       0.363  14.570  24.043  1.00143.88           N
ATOM   4054  CA  VAL B  20      -0.836  14.750  23.287  1.00143.88           C
ATOM   4055  CB  VAL B  20      -1.227  13.528  22.500  1.00143.88           C
ATOM   4056  CG1 VAL B  20      -0.209  13.353  21.369  1.00143.88           C
ATOM   4057  CG2 VAL B  20      -1.263  12.313  23.440  1.00143.88           C
ATOM   4058  C   VAL B  20      -1.932  15.082  24.260  1.00143.88           C
ATOM   4059  O   VAL B  20      -2.809  14.269  24.559  1.00143.88           O
ATOM   4060  N   GLY B  21      -1.933  16.351  24.715  1.00 53.00           N
ATOM   4061  CA  GLY B  21      -2.900  16.838  25.663  1.00 53.00           C
ATOM   4062  C   GLY B  21      -2.259  16.916  27.017  1.00 53.00           C
ATOM   4063  O   GLY B  21      -1.225  16.298  27.265  1.00 53.00           O
ATOM   4064  N   ASN B  22      -2.887  17.671  27.944  1.00 77.88           N
ATOM   4065  CA  ASN B  22      -2.318  17.888  29.239  1.00 77.88           C
ATOM   4066  CB  ASN B  22      -3.189  18.765  30.153  1.00 77.88           C
ATOM   4067  CG  ASN B  22      -3.208  20.177  29.591  1.00 77.88           C
ATOM   4068  OD1 ASN B  22      -2.693  20.434  28.504  1.00 77.88           O
ATOM   4069  ND2 ASN B  22      -3.812  21.124  30.358  1.00 77.88           N
ATOM   4070  C   ASN B  22      -2.162  16.569  29.934  1.00 77.88           C
ATOM   4071  O   ASN B  22      -1.143  16.318  30.573  1.00 77.88           O
ATOM   4072  N   ARG B  23      -3.223  15.745  29.942  1.00259.60           N
ATOM   4073  CA  ARG B  23      -3.161  14.425  30.505  1.00259.60           C
ATOM   4074  CB  ARG B  23      -4.254  13.998  31.509  1.00259.60           C
ATOM   4075  CG  ARG B  23      -5.704  13.928  31.062  1.00259.60           C
ATOM   4076  CD  ARG B  23      -6.523  13.083  32.047  1.00259.60           C
ATOM   4077  NE  ARG B  23      -6.935  13.932  33.202  1.00259.60           N
ATOM   4078  CZ  ARG B  23      -6.791  13.492  34.489  1.00259.60           C
ATOM   4079  NH1 ARG B  23      -6.146  12.318  34.756  1.00259.60           N
ATOM   4080  NH2 ARG B  23      -7.291  14.235  35.520  1.00259.60           N
ATOM   4081  C   ARG B  23      -2.817  13.315  29.538  1.00259.60           C
ATOM   4082  O   ARG B  23      -2.888  12.151  29.921  1.00259.60           O
ATOM   4083  N   GLY B  24      -2.596  13.599  28.238  1.00 60.43           N
ATOM   4084  CA  GLY B  24      -2.403  12.543  27.262  1.00 60.43           C
ATOM   4085  C   GLY B  24      -0.974  12.058  27.149  1.00 60.43           C
ATOM   4086  O   GLY B  24      -0.072  12.519  27.844  1.00 60.43           O
ATOM   4087  N   PRO B  25      -0.771  11.122  26.235  1.00109.53           N
ATOM   4088  CA  PRO B  25       0.501  10.457  26.022  1.00109.53           C
ATOM   4089  CD  PRO B  25      -1.881  10.367  25.679  1.00109.53           C
ATOM   4090  CB  PRO B  25       0.176   9.200  25.215  1.00109.53           C
ATOM   4091  CG  PRO B  25      -1.231   9.443  24.644  1.00109.53           C
ATOM   4092  C   PRO B  25       1.575  11.293  25.384  1.00109.53           C
ATOM   4093  O   PRO B  25       1.256  12.203  24.628  1.00109.53           O
ATOM   4094  N   ILE B  26       2.863  10.962  25.632  1.00 82.87           N
ATOM   4095  CA  ILE B  26       3.984  11.751  25.189  1.00 82.87           C
ATOM   4096  CB  ILE B  26       5.240  11.509  25.974  1.00 82.87           C
ATOM   4097  CG1 ILE B  26       5.002  11.922  27.435  1.00 82.87           C
ATOM   4098  CG2 ILE B  26       6.395  12.287  25.322  1.00 82.87           C
ATOM   4099  CD1 ILE B  26       6.145  11.553  28.373  1.00 82.87           C
ATOM   4100  C   ILE B  26       4.244  11.548  23.724  1.00 82.87           C
ATOM   4101  O   ILE B  26       3.973  10.487  23.162  1.00 82.87           O
ATOM   4102  N   LEU B  27       4.743  12.614  23.058  1.00 87.31           N
ATOM   4103  CA  LEU B  27       4.958  12.585  21.641  1.00 87.31           C
ATOM   4104  CB  LEU B  27       4.565  13.903  20.955  1.00 87.31           C
ATOM   4105  CG  LEU B  27       3.038  14.061  20.883  1.00 87.31           C
ATOM   4106  CD1 LEU B  27       2.618  15.389  20.234  1.00 87.31           C
ATOM   4107  CD2 LEU B  27       2.430  12.841  20.168  1.00 87.31           C
ATOM   4108  C   LEU B  27       6.376  12.238  21.287  1.00 87.31           C
ATOM   4109  O   LEU B  27       7.343  12.659  21.920  1.00 87.31           O
ATOM   4110  N   LEU B  28       6.510  11.441  20.208  1.00 70.37           N
ATOM   4111  CA  LEU B  28       7.760  10.966  19.685  1.00 70.37           C
ATOM   4112  CB  LEU B  28       7.580  10.005  18.496  1.00 70.37           C
ATOM   4113  CG  LEU B  28       8.902   9.459  17.921  1.00 70.37           C
ATOM   4114  CD1 LEU B  28       9.663   8.615  18.958  1.00 70.37           C
ATOM   4115  CD2 LEU B  28       8.659   8.692  16.611  1.00 70.37           C
ATOM   4116  C   LEU B  28       8.559  12.151  19.219  1.00 70.37           C
ATOM   4117  O   LEU B  28       9.786  12.106  19.160  1.00 70.37           O
ATOM   4118  N   GLU B  29       7.868  13.231  18.820  1.00153.86           N
ATOM   4119  CA  GLU B  29       8.481  14.429  18.318  1.00153.86           C
ATOM   4120  CB  GLU B  29       7.576  15.249  17.379  1.00153.86           C
ATOM   4121  CG  GLU B  29       6.124  15.354  17.822  1.00153.86           C
ATOM   4122  CD  GLU B  29       5.902  16.712  18.436  1.00153.86           C
ATOM   4123  OE1 GLU B  29       6.825  17.568  18.375  1.00153.86           O
ATOM   4124  OE2 GLU B  29       4.772  16.915  18.949  1.00153.86           O
ATOM   4125  C   GLU B  29       9.169  15.248  19.372  1.00153.86           C
ATOM   4126  O   GLU B  29       9.800  16.250  19.045  1.00153.86           O
ATOM   4127  N   ASP B  30       8.991  14.925  20.669  1.00101.58           N
ATOM   4128  CA  ASP B  30       9.689  15.645  21.707  1.00101.58           C
ATOM   4129  CB  ASP B  30       9.242  15.194  23.113  1.00101.58           C
ATOM   4130  CG  ASP B  30       9.849  16.102  24.178  1.00101.58           C
ATOM   4131  OD1 ASP B  30      10.818  16.838  23.854  1.00101.58           O
ATOM   4132  OD2 ASP B  30       9.343  16.071  25.332  1.00101.58           O
ATOM   4133  C   ASP B  30      11.165  15.354  21.569  1.00101.58           C
ATOM   4134  O   ASP B  30      11.725  14.498  22.255  1.00101.58           O
ATOM   4135  N   TYR B  31      11.837  16.112  20.679  1.00 85.57           N
ATOM   4136  CA  TYR B  31      13.231  15.960  20.367  1.00 85.57           C
ATOM   4137  CB  TYR B  31      13.692  17.010  19.335  1.00 85.57           C
ATOM   4138  CG  TYR B  31      15.174  16.947  19.147  1.00 85.57           C
ATOM   4139  CD1 TYR B  31      15.741  16.028  18.293  1.00 85.57           C
ATOM   4140  CD2 TYR B  31      16.002  17.820  19.817  1.00 85.57           C
ATOM   4141  CE1 TYR B  31      17.105  15.976  18.113  1.00 85.57           C
ATOM   4142  CE2 TYR B  31      17.366  17.773  19.644  1.00 85.57           C
ATOM   4143  CZ  TYR B  31      17.920  16.851  18.790  1.00 85.57           C
ATOM   4144  OH  TYR B  31      19.320  16.804  18.611  1.00 85.57           O
ATOM   4145  C   TYR B  31      14.022  16.201  21.603  1.00 85.57           C
ATOM   4146  O   TYR B  31      14.987  15.490  21.887  1.00 85.57           O
ATOM   4147  N   HIS B  32      13.630  17.229  22.370  1.00110.80           N
ATOM   4148  CA  HIS B  32      14.430  17.595  23.494  1.00110.80           C
ATOM   4149  ND1 HIS B  32      16.531  19.217  24.299  1.00110.80           N
ATOM   4150  CG  HIS B  32      15.275  19.431  24.818  1.00110.80           C
ATOM   4151  CB  HIS B  32      14.058  18.933  24.120  1.00110.80           C
ATOM   4152  NE2 HIS B  32      16.808  20.387  26.165  1.00110.80           N
ATOM   4153  CD2 HIS B  32      15.458  20.145  25.959  1.00110.80           C
ATOM   4154  CE1 HIS B  32      17.411  19.808  25.143  1.00110.80           C
ATOM   4155  C   HIS B  32      14.431  16.524  24.547  1.00110.80           C
ATOM   4156  O   HIS B  32      15.469  16.243  25.146  1.00110.80           O
ATOM   4157  N   LEU B  33      13.270  15.898  24.813  1.00 62.66           N
ATOM   4158  CA  LEU B  33      13.182  14.883  25.828  1.00 62.66           C
ATOM   4159  CB  LEU B  33      11.729  14.397  26.015  1.00 62.66           C
ATOM   4160  CG  LEU B  33      11.524  13.265  27.039  1.00 62.66           C
ATOM   4161  CD1 LEU B  33      12.012  13.663  28.441  1.00 62.66           C
ATOM   4162  CD2 LEU B  33      10.058  12.797  27.042  1.00 62.66           C
ATOM   4163  C   LEU B  33      14.037  13.713  25.436  1.00 62.66           C
ATOM   4164  O   LEU B  33      14.792  13.183  26.251  1.00 62.66           O
ATOM   4165  N   VAL B  34      13.945  13.308  24.155  1.00 52.99           N
ATOM   4166  CA  VAL B  34      14.607  12.155  23.610  1.00 52.99           C
ATOM   4167  CB  VAL B  34      14.261  11.957  22.165  1.00 52.99           C
ATOM   4168  CG1 VAL B  34      15.120  10.808  21.616  1.00 52.99           C
ATOM   4169  CG2 VAL B  34      12.745  11.746  22.032  1.00 52.99           C
ATOM   4170  C   VAL B  34      16.096  12.303  23.641  1.00 52.99           C
ATOM   4171  O   VAL B  34      16.798  11.376  24.046  1.00 52.99           O
ATOM   4172  N   GLU B  35      16.637  13.460  23.201  1.00139.53           N
ATOM   4173  CA  GLU B  35      18.071  13.551  23.235  1.00139.53           C
ATOM   4174  CB  GLU B  35      18.725  14.860  22.792  1.00139.53           C
ATOM   4175  CG  GLU B  35      19.101  14.950  21.323  1.00139.53           C
ATOM   4176  CD  GLU B  35      20.338  15.836  21.330  1.00139.53           C
ATOM   4177  OE1 GLU B  35      20.180  17.083  21.370  1.00139.53           O
ATOM   4178  OE2 GLU B  35      21.464  15.272  21.327  1.00139.53           O
ATOM   4179  C   GLU B  35      18.534  13.424  24.640  1.00139.53           C
ATOM   4180  O   GLU B  35      19.567  12.818  24.911  1.00139.53           O
ATOM   4181  N   LYS B  36      17.787  14.049  25.557  1.00110.41           N
ATOM   4182  CA  LYS B  36      18.105  14.122  26.953  1.00110.41           C
ATOM   4183  CB  LYS B  36      17.050  15.021  27.622  1.00110.41           C
ATOM   4184  CG  LYS B  36      17.308  15.399  29.068  1.00110.41           C
ATOM   4185  CD  LYS B  36      16.663  16.741  29.417  1.00110.41           C
ATOM   4186  CE  LYS B  36      17.199  17.367  30.703  1.00110.41           C
ATOM   4187  NZ  LYS B  36      16.283  17.058  31.807  1.00110.41           N
ATOM   4188  C   LYS B  36      18.128  12.757  27.589  1.00110.41           C
ATOM   4189  O   LYS B  36      19.117  12.378  28.217  1.00110.41           O
ATOM   4190  N   LEU B  37      17.042  11.977  27.430  1.00133.53           N
ATOM   4191  CA  LEU B  37      16.948  10.665  28.017  1.00133.53           C
ATOM   4192  CB  LEU B  37      15.539  10.062  27.869  1.00133.53           C
ATOM   4193  CG  LEU B  37      15.389   8.657  28.482  1.00133.53           C
ATOM   4194  CD1 LEU B  37      15.681   8.675  29.990  1.00133.53           C
ATOM   4195  CD2 LEU B  37      14.008   8.059  28.167  1.00133.53           C
ATOM   4196  C   LEU B  37      17.922   9.750  27.342  1.00133.53           C
ATOM   4197  O   LEU B  37      18.558   8.919  27.987  1.00133.53           O
ATOM   4198  N   ALA B  38      18.051   9.887  26.010  1.00 55.19           N
ATOM   4199  CA  ALA B  38      18.873   9.037  25.191  1.00 55.19           C
ATOM   4200  CB  ALA B  38      18.694   9.320  23.686  1.00 55.19           C
ATOM   4201  C   ALA B  38      20.329   9.181  25.541  1.00 55.19           C
ATOM   4202  O   ALA B  38      21.097   8.229  25.415  1.00 55.19           O
ATOM   4203  N   ASN B  39      20.778  10.398  25.896  1.00 61.77           N
ATOM   4204  CA  ASN B  39      22.143  10.609  26.305  1.00 61.77           C
ATOM   4205  CB  ASN B  39      22.484  12.108  26.396  1.00 61.77           C
ATOM   4206  CG  ASN B  39      23.932  12.267  26.834  1.00 61.77           C
ATOM   4207  OD1 ASN B  39      24.263  13.181  27.589  1.00 61.77           O
ATOM   4208  ND2 ASN B  39      24.822  11.365  26.344  1.00 61.77           N
ATOM   4209  C   ASN B  39      22.360  10.003  27.659  1.00 61.77           C
ATOM   4210  O   ASN B  39      23.394   9.392  27.929  1.00 61.77           O
ATOM   4211  N   PHE B  40      21.357  10.166  28.543  1.00 72.76           N
ATOM   4212  CA  PHE B  40      21.357   9.689  29.898  1.00 72.76           C
ATOM   4213  CB  PHE B  40      20.054  10.055  30.633  1.00 72.76           C
ATOM   4214  CG  PHE B  40      20.057   9.358  31.947  1.00 72.76           C
ATOM   4215  CD1 PHE B  40      20.803   9.839  32.996  1.00 72.76           C
ATOM   4216  CD2 PHE B  40      19.301   8.223  32.131  1.00 72.76           C
ATOM   4217  CE1 PHE B  40      20.803   9.194  34.211  1.00 72.76           C
ATOM   4218  CE2 PHE B  40      19.297   7.576  33.343  1.00 72.76           C
ATOM   4219  CZ  PHE B  40      20.051   8.057  34.385  1.00 72.76           C
ATOM   4220  C   PHE B  40      21.467   8.203  29.868  1.00 72.76           C
ATOM   4221  O   PHE B  40      22.146   7.606  30.702  1.00 72.76           O
ATOM   4222  N   ASP B  41      20.794   7.570  28.895  1.00 99.97           N
ATOM   4223  CA  ASP B  41      20.772   6.141  28.789  1.00 99.97           C
ATOM   4224  CB  ASP B  41      19.811   5.646  27.692  1.00 99.97           C
ATOM   4225  CG  ASP B  41      18.392   6.003  28.128  1.00 99.97           C
ATOM   4226  OD1 ASP B  41      18.195   6.261  29.346  1.00 99.97           O
ATOM   4227  OD2 ASP B  41      17.490   6.037  27.247  1.00 99.97           O
ATOM   4228  C   ASP B  41      22.152   5.614  28.495  1.00 99.97           C
ATOM   4229  O   ASP B  41      22.440   4.452  28.770  1.00 99.97           O
ATOM   4230  N   ARG B  42      22.969   6.419  27.789  1.00194.93           N
ATOM   4231  CA  ARG B  42      24.312   6.180  27.319  1.00194.93           C
ATOM   4232  CB  ARG B  42      24.518   6.716  25.897  1.00194.93           C
ATOM   4233  CG  ARG B  42      23.892   5.743  24.891  1.00194.93           C
ATOM   4234  CD  ARG B  42      23.435   6.355  23.565  1.00194.93           C
ATOM   4235  NE  ARG B  42      22.968   5.219  22.716  1.00194.93           N
ATOM   4236  CZ  ARG B  42      21.745   4.649  22.929  1.00194.93           C
ATOM   4237  NH1 ARG B  42      20.925   5.132  23.909  1.00194.93           N
ATOM   4238  NH2 ARG B  42      21.351   3.570  22.188  1.00194.93           N
ATOM   4239  C   ARG B  42      25.471   6.557  28.213  1.00194.93           C
ATOM   4240  O   ARG B  42      26.624   6.365  27.820  1.00194.93           O
ATOM   4241  N   GLU B  43      25.232   7.197  29.373  1.00 86.00           N
ATOM   4242  CA  GLU B  43      26.306   7.747  30.164  1.00 86.00           C
ATOM   4243  CB  GLU B  43      25.830   8.505  31.417  1.00 86.00           C
ATOM   4244  CG  GLU B  43      25.180   9.855  31.079  1.00 86.00           C
ATOM   4245  CD  GLU B  43      24.768  10.552  32.369  1.00 86.00           C
ATOM   4246  OE1 GLU B  43      25.181  10.082  33.463  1.00 86.00           O
ATOM   4247  OE2 GLU B  43      24.037  11.574  32.276  1.00 86.00           O
ATOM   4248  C   GLU B  43      27.335   6.733  30.584  1.00 86.00           C
ATOM   4249  O   GLU B  43      28.520   7.061  30.624  1.00 86.00           O
ATOM   4250  N   ARG B  44      26.933   5.490  30.917  1.00142.05           N
ATOM   4251  CA  ARG B  44      27.859   4.509  31.435  1.00142.05           C
ATOM   4252  CB  ARG B  44      27.189   3.357  32.208  1.00142.05           C
ATOM   4253  CG  ARG B  44      26.717   3.672  33.635  1.00142.05           C
ATOM   4254  CD  ARG B  44      25.453   4.526  33.739  1.00142.05           C
ATOM   4255  NE  ARG B  44      25.867   5.953  33.783  1.00142.05           N
ATOM   4256  CZ  ARG B  44      26.049   6.564  34.991  1.00142.05           C
ATOM   4257  NH1 ARG B  44      25.887   5.858  36.149  1.00142.05           N
ATOM   4258  NH2 ARG B  44      26.378   7.887  35.038  1.00142.05           N
ATOM   4259  C   ARG B  44      28.719   3.862  30.386  1.00142.05           C
ATOM   4260  O   ARG B  44      28.323   3.661  29.239  1.00142.05           O
ATOM   4261  N   ILE B  45      29.945   3.496  30.831  1.00146.46           N
ATOM   4262  CA  ILE B  45      31.012   2.870  30.097  1.00146.46           C
ATOM   4263  CB  ILE B  45      32.187   3.805  29.975  1.00146.46           C
ATOM   4264  CG1 ILE B  45      33.221   3.339  28.945  1.00146.46           C
ATOM   4265  CG2 ILE B  45      32.771   4.001  31.386  1.00146.46           C
ATOM   4266  CD1 ILE B  45      34.195   4.452  28.561  1.00146.46           C
ATOM   4267  C   ILE B  45      31.450   1.713  30.953  1.00146.46           C
ATOM   4268  O   ILE B  45      31.102   1.669  32.130  1.00146.46           O
ATOM   4269  N   PRO B  46      32.181   0.760  30.430  1.00 73.89           N
ATOM   4270  CA  PRO B  46      32.581  -0.381  31.218  1.00 73.89           C
ATOM   4271  CD  PRO B  46      32.149   0.467  29.007  1.00 73.89           C
ATOM   4272  CB  PRO B  46      33.164  -1.382  30.223  1.00 73.89           C
ATOM   4273  CG  PRO B  46      32.459  -1.036  28.897  1.00 73.89           C
ATOM   4274  C   PRO B  46      33.552   0.029  32.282  1.00 73.89           C
ATOM   4275  O   PRO B  46      34.350   0.934  32.044  1.00 73.89           O
ATOM   4276  N   GLU B  47      33.500  -0.605  33.470  1.00 58.95           N
ATOM   4277  CA  GLU B  47      34.457  -0.282  34.487  1.00 58.95           C
ATOM   4278  CB  GLU B  47      34.001  -0.570  35.929  1.00 58.95           C
ATOM   4279  CG  GLU B  47      33.664  -2.030  36.219  1.00 58.95           C
ATOM   4280  CD  GLU B  47      33.526  -2.160  37.728  1.00 58.95           C
ATOM   4281  OE1 GLU B  47      32.832  -1.307  38.343  1.00 58.95           O
ATOM   4282  OE2 GLU B  47      34.134  -3.111  38.287  1.00 58.95           O
ATOM   4283  C   GLU B  47      35.694  -1.083  34.200  1.00 58.95           C
ATOM   4284  O   GLU B  47      35.672  -2.007  33.387  1.00 58.95           O
ATOM   4285  N   ARG B  48      36.818  -0.715  34.849  1.00124.22           N
ATOM   4286  CA  ARG B  48      38.087  -1.382  34.693  1.00124.22           C
ATOM   4287  CB  ARG B  48      39.154  -0.861  35.687  1.00124.22           C
ATOM   4288  CG  ARG B  48      39.394   0.658  35.722  1.00124.22           C
ATOM   4289  CD  ARG B  48      40.691   1.100  35.042  1.00124.22           C
ATOM   4290  NE  ARG B  48      41.027   2.496  35.457  1.00124.22           N
ATOM   4291  CZ  ARG B  48      40.234   3.548  35.100  1.00124.22           C
ATOM   4292  NH1 ARG B  48      38.936   3.335  34.743  1.00124.22           N
ATOM   4293  NH2 ARG B  48      40.740   4.815  35.104  1.00124.22           N
ATOM   4294  C   ARG B  48      37.878  -2.825  35.051  1.00124.22           C
ATOM   4295  O   ARG B  48      37.192  -3.138  36.024  1.00124.22           O
ATOM   4296  N   VAL B  49      38.498  -3.748  34.282  1.00121.93           N
ATOM   4297  CA  VAL B  49      38.335  -5.154  34.544  1.00121.93           C
ATOM   4298  CB  VAL B  49      39.118  -6.017  33.600  1.00121.93           C
ATOM   4299  CG1 VAL B  49      40.612  -5.661  33.704  1.00121.93           C
ATOM   4300  CG2 VAL B  49      38.794  -7.485  33.923  1.00121.93           C
ATOM   4301  C   VAL B  49      38.799  -5.406  35.948  1.00121.93           C
ATOM   4302  O   VAL B  49      38.185  -6.182  36.681  1.00121.93           O
ATOM   4303  N   VAL B  50      39.910  -4.765  36.358  1.00131.93           N
ATOM   4304  CA  VAL B  50      40.352  -4.876  37.718  1.00131.93           C
ATOM   4305  CB  VAL B  50      41.589  -5.732  37.825  1.00131.93           C
ATOM   4306  CG1 VAL B  50      42.002  -5.884  39.292  1.00131.93           C
ATOM   4307  CG2 VAL B  50      41.328  -7.070  37.116  1.00131.93           C
ATOM   4308  C   VAL B  50      40.706  -3.456  38.096  1.00131.93           C
ATOM   4309  O   VAL B  50      40.890  -2.616  37.217  1.00131.93           O
ATOM   4310  N   HIS B  51      40.800  -3.146  39.407  1.00 73.99           N
ATOM   4311  CA  HIS B  51      41.117  -1.825  39.907  1.00 73.99           C
ATOM   4312  ND1 HIS B  51      44.263  -1.611  41.242  1.00 73.99           N
ATOM   4313  CG  HIS B  51      43.652  -2.013  40.073  1.00 73.99           C
ATOM   4314  CB  HIS B  51      42.490  -1.298  39.446  1.00 73.99           C
ATOM   4315  NE2 HIS B  51      45.330  -3.440  40.565  1.00 73.99           N
ATOM   4316  CD2 HIS B  51      44.317  -3.131  39.674  1.00 73.99           C
ATOM   4317  CE1 HIS B  51      45.259  -2.499  41.488  1.00 73.99           C
ATOM   4318  C   HIS B  51      40.088  -0.818  39.494  1.00 73.99           C
ATOM   4319  O   HIS B  51      40.414   0.347  39.284  1.00 73.99           O
ATOM   4320  N   ALA B  52      38.810  -1.234  39.412  1.00 43.76           N
ATOM   4321  CA  ALA B  52      37.723  -0.367  39.047  1.00 43.76           C
ATOM   4322  CB  ALA B  52      36.389  -1.121  38.928  1.00 43.76           C
ATOM   4323  C   ALA B  52      37.535   0.711  40.094  1.00 43.76           C
ATOM   4324  O   ALA B  52      37.227   1.854  39.758  1.00 43.76           O
ATOM   4325  N   ARG B  53      37.685   0.384  41.397  1.00130.65           N
ATOM   4326  CA  ARG B  53      37.490   1.372  42.434  1.00130.65           C
ATOM   4327  CB  ARG B  53      37.253   0.750  43.825  1.00130.65           C
ATOM   4328  CG  ARG B  53      37.088   1.799  44.926  1.00130.65           C
ATOM   4329  CD  ARG B  53      35.771   2.560  44.810  1.00130.65           C
ATOM   4330  NE  ARG B  53      35.878   3.809  45.610  1.00130.65           N
ATOM   4331  CZ  ARG B  53      34.746   4.525  45.864  1.00130.65           C
ATOM   4332  NH1 ARG B  53      33.532   4.007  45.524  1.00130.65           N
ATOM   4333  NH2 ARG B  53      34.824   5.759  46.440  1.00130.65           N
ATOM   4334  C   ARG B  53      38.740   2.207  42.556  1.00130.65           C
ATOM   4335  O   ARG B  53      39.810   1.677  42.858  1.00130.65           O
ATOM   4336  N   GLY B  54      38.643   3.550  42.373  1.00 38.59           N
ATOM   4337  CA  GLY B  54      39.860   4.327  42.431  1.00 38.59           C
ATOM   4338  C   GLY B  54      39.607   5.801  42.632  1.00 38.59           C
ATOM   4339  O   GLY B  54      38.469   6.268  42.640  1.00 38.59           O
ATOM   4340  N   ALA B  55      40.712   6.570  42.817  1.00 48.11           N
ATOM   4341  CA  ALA B  55      40.665   8.001  43.008  1.00 48.11           C
ATOM   4342  CB  ALA B  55      40.745   8.419  44.488  1.00 48.11           C
ATOM   4343  C   ALA B  55      41.849   8.618  42.306  1.00 48.11           C
ATOM   4344  O   ALA B  55      42.960   8.100  42.386  1.00 48.11           O
ATOM   4345  N   SER B  56      41.656   9.771  41.620  1.00 90.26           N
ATOM   4346  CA  SER B  56      42.752  10.364  40.886  1.00 90.26           C
ATOM   4347  CB  SER B  56      42.602  10.276  39.357  1.00 90.26           C
ATOM   4348  OG  SER B  56      41.559  11.135  38.919  1.00 90.26           O
ATOM   4349  C   SER B  56      42.919  11.823  41.221  1.00 90.26           C
ATOM   4350  O   SER B  56      41.974  12.489  41.644  1.00 90.26           O
ATOM   4351  N   ALA B  57      44.165  12.343  41.049  1.00 43.48           N
ATOM   4352  CA  ALA B  57      44.455  13.741  41.279  1.00 43.48           C
ATOM   4353  CB  ALA B  57      44.776  14.078  42.746  1.00 43.48           C
ATOM   4354  C   ALA B  57      45.656  14.168  40.468  1.00 43.48           C
ATOM   4355  O   ALA B  57      46.476  13.348  40.058  1.00 43.48           O
ATOM   4356  N   LYS B  58      45.775  15.494  40.213  1.00 72.16           N
ATOM   4357  CA  LYS B  58      46.853  16.062  39.439  1.00 72.16           C
ATOM   4358  CB  LYS B  58      46.407  17.236  38.551  1.00 72.16           C
ATOM   4359  CG  LYS B  58      45.497  16.794  37.406  1.00 72.16           C
ATOM   4360  CD  LYS B  58      44.757  17.940  36.718  1.00 72.16           C
ATOM   4361  CE  LYS B  58      45.635  18.745  35.756  1.00 72.16           C
ATOM   4362  NZ  LYS B  58      44.786  19.625  34.925  1.00 72.16           N
ATOM   4363  C   LYS B  58      47.952  16.560  40.339  1.00 72.16           C
ATOM   4364  O   LYS B  58      47.728  16.852  41.514  1.00 72.16           O
ATOM   4365  N   GLY B  59      49.189  16.668  39.789  1.00 27.39           N
ATOM   4366  CA  GLY B  59      50.300  17.133  40.578  1.00 27.39           C
ATOM   4367  C   GLY B  59      51.543  17.221  39.738  1.00 27.39           C
ATOM   4368  O   GLY B  59      51.498  17.160  38.509  1.00 27.39           O
ATOM   4369  N   PHE B  60      52.706  17.395  40.407  1.00103.05           N
ATOM   4370  CA  PHE B  60      53.935  17.515  39.675  1.00103.05           C
ATOM   4371  CB  PHE B  60      54.478  18.958  39.581  1.00103.05           C
ATOM   4372  CG  PHE B  60      54.808  19.492  40.935  1.00103.05           C
ATOM   4373  CD1 PHE B  60      56.025  19.226  41.520  1.00103.05           C
ATOM   4374  CD2 PHE B  60      53.906  20.278  41.617  1.00103.05           C
ATOM   4375  CE1 PHE B  60      56.333  19.729  42.764  1.00103.05           C
ATOM   4376  CE2 PHE B  60      54.207  20.783  42.861  1.00103.05           C
ATOM   4377  CZ  PHE B  60      55.422  20.505  43.440  1.00103.05           C
ATOM   4378  C   PHE B  60      54.991  16.649  40.293  1.00103.05           C
ATOM   4379  O   PHE B  60      54.949  16.328  41.480  1.00103.05           O
ATOM   4380  N   PHE B  61      55.958  16.216  39.456  1.00 63.02           N
ATOM   4381  CA  PHE B  61      57.074  15.430  39.903  1.00 63.02           C
ATOM   4382  CB  PHE B  61      57.290  14.149  39.067  1.00 63.02           C
ATOM   4383  CG  PHE B  61      58.487  13.396  39.556  1.00 63.02           C
ATOM   4384  CD1 PHE B  61      58.433  12.641  40.706  1.00 63.02           C
ATOM   4385  CD2 PHE B  61      59.664  13.422  38.839  1.00 63.02           C
ATOM   4386  CE1 PHE B  61      59.534  11.941  41.142  1.00 63.02           C
ATOM   4387  CE2 PHE B  61      60.771  12.725  39.267  1.00 63.02           C
ATOM   4388  CZ  PHE B  61      60.706  11.985  40.424  1.00 63.02           C
ATOM   4389  C   PHE B  61      58.291  16.287  39.744  1.00 63.02           C
ATOM   4390  O   PHE B  61      58.484  16.909  38.700  1.00 63.02           O
ATOM   4391  N   GLU B  62      59.138  16.349  40.795  1.00 70.27           N
ATOM   4392  CA  GLU B  62      60.326  17.154  40.730  1.00 70.27           C
ATOM   4393  CB  GLU B  62      60.404  18.206  41.853  1.00 70.27           C
ATOM   4394  CG  GLU B  62      59.291  19.257  41.773  1.00 70.27           C
ATOM   4395  CD  GLU B  62      59.502  20.263  42.895  1.00 70.27           C
ATOM   4396  OE1 GLU B  62      59.505  19.843  44.083  1.00 70.27           O
ATOM   4397  OE2 GLU B  62      59.668  21.470  42.573  1.00 70.27           O
ATOM   4398  C   GLU B  62      61.509  16.242  40.872  1.00 70.27           C
ATOM   4399  O   GLU B  62      61.610  15.482  41.834  1.00 70.27           O
ATOM   4400  N   VAL B  63      62.451  16.298  39.906  1.00147.15           N
ATOM   4401  CA  VAL B  63      63.577  15.415  40.007  1.00147.15           C
ATOM   4402  CB  VAL B  63      63.981  14.814  38.682  1.00147.15           C
ATOM   4403  CG1 VAL B  63      64.229  15.931  37.664  1.00147.15           C
ATOM   4404  CG2 VAL B  63      65.168  13.861  38.895  1.00147.15           C
ATOM   4405  C   VAL B  63      64.702  16.116  40.711  1.00147.15           C
ATOM   4406  O   VAL B  63      65.174  17.176  40.302  1.00147.15           O
ATOM   4407  N   THR B  64      65.061  15.567  41.891  1.00123.77           N
ATOM   4408  CA  THR B  64      66.114  16.053  42.736  1.00123.77           C
ATOM   4409  CB  THR B  64      65.948  15.615  44.160  1.00123.77           C
ATOM   4410  OG1 THR B  64      65.958  14.199  44.248  1.00123.77           O
ATOM   4411  CG2 THR B  64      64.614  16.174  44.683  1.00123.77           C
ATOM   4412  C   THR B  64      67.479  15.654  42.249  1.00123.77           C
ATOM   4413  O   THR B  64      68.415  16.449  42.323  1.00123.77           O
ATOM   4414  N   HIS B  65      67.641  14.408  41.750  1.00 77.00           N
ATOM   4415  CA  HIS B  65      68.957  13.963  41.371  1.00 77.00           C
ATOM   4416  ND1 HIS B  65      68.893  13.301  44.693  1.00 77.00           N
ATOM   4417  CG  HIS B  65      69.810  13.276  43.666  1.00 77.00           C
ATOM   4418  CB  HIS B  65      69.505  12.837  42.266  1.00 77.00           C
ATOM   4419  NE2 HIS B  65      70.817  14.019  45.543  1.00 77.00           N
ATOM   4420  CD2 HIS B  65      70.979  13.718  44.203  1.00 77.00           C
ATOM   4421  CE1 HIS B  65      69.548  13.752  45.792  1.00 77.00           C
ATOM   4422  C   HIS B  65      68.938  13.408  39.979  1.00 77.00           C
ATOM   4423  O   HIS B  65      68.041  12.655  39.603  1.00 77.00           O
ATOM   4424  N   ASP B  66      69.977  13.765  39.196  1.00 61.43           N
ATOM   4425  CA  ASP B  66      70.171  13.350  37.832  1.00 61.43           C
ATOM   4426  CB  ASP B  66      71.418  14.000  37.206  1.00 61.43           C
ATOM   4427  CG  ASP B  66      71.577  13.508  35.778  1.00 61.43           C
ATOM   4428  OD1 ASP B  66      70.561  13.066  35.179  1.00 61.43           O
ATOM   4429  OD2 ASP B  66      72.726  13.568  35.264  1.00 61.43           O
ATOM   4430  C   ASP B  66      70.378  11.861  37.765  1.00 61.43           C
ATOM   4431  O   ASP B  66      71.119  11.288  38.560  1.00 61.43           O
ATOM   4432  N   ILE B  67      69.610  11.217  36.860  1.00167.26           N
ATOM   4433  CA  ILE B  67      69.576   9.841  36.432  1.00167.26           C
ATOM   4434  CB  ILE B  67      68.290   9.386  35.825  1.00167.26           C
ATOM   4435  CG1 ILE B  67      68.180   7.849  35.924  1.00167.26           C
ATOM   4436  CG2 ILE B  67      68.334   9.858  34.364  1.00167.26           C
ATOM   4437  CD1 ILE B  67      66.802   7.287  35.573  1.00167.26           C
ATOM   4438  C   ILE B  67      70.589   9.524  35.367  1.00167.26           C
ATOM   4439  O   ILE B  67      70.761   8.358  35.019  1.00167.26           O
ATOM   4440  N   SER B  68      71.174  10.551  34.720  1.00106.12           N
ATOM   4441  CA  SER B  68      71.917  10.426  33.490  1.00106.12           C
ATOM   4442  CB  SER B  68      72.751  11.680  33.179  1.00106.12           C
ATOM   4443  OG  SER B  68      73.457  11.506  31.960  1.00106.12           O
ATOM   4444  C   SER B  68      72.848   9.257  33.486  1.00106.12           C
ATOM   4445  O   SER B  68      73.097   8.682  32.426  1.00106.12           O
ATOM   4446  N   HIS B  69      73.394   8.857  34.643  1.00 60.11           N
ATOM   4447  CA  HIS B  69      74.268   7.722  34.621  1.00 60.11           C
ATOM   4448  ND1 HIS B  69      76.959   6.074  35.990  1.00 60.11           N
ATOM   4449  CG  HIS B  69      75.586   6.116  36.106  1.00 60.11           C
ATOM   4450  CB  HIS B  69      74.753   7.361  36.035  1.00 60.11           C
ATOM   4451  NE2 HIS B  69      76.282   3.980  36.319  1.00 60.11           N
ATOM   4452  CD2 HIS B  69      75.190   4.828  36.305  1.00 60.11           C
ATOM   4453  CE1 HIS B  69      77.322   4.773  36.126  1.00 60.11           C
ATOM   4454  C   HIS B  69      73.511   6.537  34.081  1.00 60.11           C
ATOM   4455  O   HIS B  69      74.011   5.815  33.220  1.00 60.11           O
ATOM   4456  N   LEU B  70      72.311   6.288  34.640  1.00 98.40           N
ATOM   4457  CA  LEU B  70      71.423   5.196  34.332  1.00 98.40           C
ATOM   4458  CB  LEU B  70      70.438   4.957  35.485  1.00 98.40           C
ATOM   4459  CG  LEU B  70      71.139   4.756  36.842  1.00 98.40           C
ATOM   4460  CD1 LEU B  70      70.134   4.357  37.935  1.00 98.40           C
ATOM   4461  CD2 LEU B  70      72.329   3.791  36.731  1.00 98.40           C
ATOM   4462  C   LEU B  70      70.592   5.342  33.082  1.00 98.40           C
ATOM   4463  O   LEU B  70      70.433   4.368  32.344  1.00 98.40           O
ATOM   4464  N   THR B  71      69.986   6.535  32.833  1.00167.71           N
ATOM   4465  CA  THR B  71      69.089   6.646  31.705  1.00167.71           C
ATOM   4466  CB  THR B  71      67.618   6.714  32.012  1.00167.71           C
ATOM   4467  OG1 THR B  71      67.306   7.960  32.609  1.00167.71           O
ATOM   4468  CG2 THR B  71      67.207   5.594  32.960  1.00167.71           C
ATOM   4469  C   THR B  71      69.274   7.948  30.985  1.00167.71           C
ATOM   4470  O   THR B  71      69.664   8.971  31.546  1.00167.71           O
ATOM   4471  N   CYS B  72      68.982   7.880  29.676  1.00121.92           N
ATOM   4472  CA  CYS B  72      68.951   8.915  28.688  1.00121.92           C
ATOM   4473  CB  CYS B  72      69.042   8.334  27.263  1.00121.92           C
ATOM   4474  SG  CYS B  72      69.024   9.600  25.960  1.00121.92           S
ATOM   4475  C   CYS B  72      67.675   9.709  28.784  1.00121.92           C
ATOM   4476  O   CYS B  72      67.577  10.753  28.142  1.00121.92           O
ATOM   4477  N   ALA B  73      66.645   9.203  29.510  1.00 70.03           N
ATOM   4478  CA  ALA B  73      65.343   9.831  29.574  1.00 70.03           C
ATOM   4479  CB  ALA B  73      64.448   9.257  30.686  1.00 70.03           C
ATOM   4480  C   ALA B  73      65.508  11.304  29.819  1.00 70.03           C
ATOM   4481  O   ALA B  73      66.204  11.725  30.741  1.00 70.03           O
ATOM   4482  N   ASP B  74      64.841  12.125  28.979  1.00108.30           N
ATOM   4483  CA  ASP B  74      65.066  13.547  28.977  1.00108.30           C
ATOM   4484  CB  ASP B  74      64.368  14.299  27.825  1.00108.30           C
ATOM   4485  CG  ASP B  74      62.864  14.132  27.940  1.00108.30           C
ATOM   4486  OD1 ASP B  74      62.400  12.961  27.919  1.00108.30           O
ATOM   4487  OD2 ASP B  74      62.159  15.171  28.050  1.00108.30           O
ATOM   4488  C   ASP B  74      64.693  14.210  30.272  1.00108.30           C
ATOM   4489  O   ASP B  74      65.440  15.056  30.761  1.00108.30           O
ATOM   4490  N   PHE B  75      63.554  13.847  30.888  1.00105.31           N
ATOM   4491  CA  PHE B  75      63.140  14.570  32.066  1.00105.31           C
ATOM   4492  CB  PHE B  75      61.681  14.319  32.508  1.00105.31           C
ATOM   4493  CG  PHE B  75      61.471  12.924  32.986  1.00105.31           C
ATOM   4494  CD1 PHE B  75      61.309  11.888  32.097  1.00105.31           C
ATOM   4495  CD2 PHE B  75      61.399  12.663  34.337  1.00105.31           C
ATOM   4496  CE1 PHE B  75      61.100  10.607  32.548  1.00105.31           C
ATOM   4497  CE2 PHE B  75      61.190  11.382  34.794  1.00105.31           C
ATOM   4498  CZ  PHE B  75      61.043  10.352  33.896  1.00105.31           C
ATOM   4499  C   PHE B  75      64.072  14.345  33.230  1.00105.31           C
ATOM   4500  O   PHE B  75      64.173  15.189  34.120  1.00105.31           O
ATOM   4501  N   LEU B  76      64.707  13.160  33.294  1.00127.77           N
ATOM   4502  CA  LEU B  76      65.587  12.714  34.348  1.00127.77           C
ATOM   4503  CB  LEU B  76      65.722  11.189  34.340  1.00127.77           C
ATOM   4504  CG  LEU B  76      64.425  10.474  34.765  1.00127.77           C
ATOM   4505  CD1 LEU B  76      64.557   8.958  34.648  1.00127.77           C
ATOM   4506  CD2 LEU B  76      64.011  10.867  36.190  1.00127.77           C
ATOM   4507  C   LEU B  76      66.957  13.351  34.354  1.00127.77           C
ATOM   4508  O   LEU B  76      67.702  13.196  35.321  1.00127.77           O
ATOM   4509  N   ARG B  77      67.385  13.986  33.247  1.00132.37           N
ATOM   4510  CA  ARG B  77      68.728  14.500  33.130  1.00132.37           C
ATOM   4511  CB  ARG B  77      69.021  15.067  31.738  1.00132.37           C
ATOM   4512  CG  ARG B  77      70.480  15.478  31.559  1.00132.37           C
ATOM   4513  CD  ARG B  77      70.738  16.116  30.199  1.00132.37           C
ATOM   4514  NE  ARG B  77      70.202  15.165  29.187  1.00132.37           N
ATOM   4515  CZ  ARG B  77      71.020  14.233  28.620  1.00132.37           C
ATOM   4516  NH1 ARG B  77      72.354  14.232  28.907  1.00132.37           N
ATOM   4517  NH2 ARG B  77      70.501  13.305  27.766  1.00132.37           N
ATOM   4518  C   ARG B  77      69.067  15.592  34.105  1.00132.37           C
ATOM   4519  O   ARG B  77      70.157  15.584  34.677  1.00132.37           O
ATOM   4520  N   ALA B  78      68.171  16.573  34.327  1.00 43.25           N
ATOM   4521  CA  ALA B  78      68.589  17.683  35.137  1.00 43.25           C
ATOM   4522  CB  ALA B  78      68.455  19.032  34.412  1.00 43.25           C
ATOM   4523  C   ALA B  78      67.765  17.769  36.378  1.00 43.25           C
ATOM   4524  O   ALA B  78      66.556  17.549  36.389  1.00 43.25           O
ATOM   4525  N   PRO B  79      68.439  18.092  37.445  1.00 82.23           N
ATOM   4526  CA  PRO B  79      67.736  18.255  38.680  1.00 82.23           C
ATOM   4527  CD  PRO B  79      69.785  17.596  37.659  1.00 82.23           C
ATOM   4528  CB  PRO B  79      68.786  18.177  39.790  1.00 82.23           C
ATOM   4529  CG  PRO B  79      70.139  18.140  39.049  1.00 82.23           C
ATOM   4530  C   PRO B  79      66.941  19.516  38.628  1.00 82.23           C
ATOM   4531  O   PRO B  79      67.392  20.480  38.012  1.00 82.23           O
ATOM   4532  N   GLY B  80      65.749  19.522  39.253  1.00 24.30           N
ATOM   4533  CA  GLY B  80      64.941  20.703  39.297  1.00 24.30           C
ATOM   4534  C   GLY B  80      63.917  20.690  38.201  1.00 24.30           C
ATOM   4535  O   GLY B  80      63.002  21.512  38.205  1.00 24.30           O
ATOM   4536  N   VAL B  81      64.020  19.761  37.231  1.00 31.12           N
ATOM   4537  CA  VAL B  81      63.039  19.742  36.182  1.00 31.12           C
ATOM   4538  CB  VAL B  81      63.369  18.803  35.057  1.00 31.12           C
ATOM   4539  CG1 VAL B  81      62.222  18.841  34.033  1.00 31.12           C
ATOM   4540  CG2 VAL B  81      64.740  19.192  34.481  1.00 31.12           C
ATOM   4541  C   VAL B  81      61.753  19.274  36.785  1.00 31.12           C
ATOM   4542  O   VAL B  81      61.749  18.394  37.644  1.00 31.12           O
ATOM   4543  N   GLN B  82      60.624  19.872  36.345  1.00 44.57           N
ATOM   4544  CA  GLN B  82      59.337  19.533  36.885  1.00 44.57           C
ATOM   4545  CB  GLN B  82      58.609  20.756  37.473  1.00 44.57           C
ATOM   4546  CG  GLN B  82      59.359  21.425  38.629  1.00 44.57           C
ATOM   4547  CD  GLN B  82      58.621  22.709  38.983  1.00 44.57           C
ATOM   4548  OE1 GLN B  82      59.202  23.646  39.529  1.00 44.57           O
ATOM   4549  NE2 GLN B  82      57.303  22.760  38.654  1.00 44.57           N
ATOM   4550  C   GLN B  82      58.479  19.011  35.769  1.00 44.57           C
ATOM   4551  O   GLN B  82      58.456  19.572  34.673  1.00 44.57           O
ATOM   4552  N   THR B  83      57.747  17.906  36.025  1.00102.44           N
ATOM   4553  CA  THR B  83      56.886  17.348  35.019  1.00102.44           C
ATOM   4554  CB  THR B  83      57.344  16.000  34.532  1.00102.44           C
ATOM   4555  OG1 THR B  83      56.551  15.579  33.432  1.00102.44           O
ATOM   4556  CG2 THR B  83      57.247  14.983  35.684  1.00102.44           C
ATOM   4557  C   THR B  83      55.507  17.190  35.595  1.00102.44           C
ATOM   4558  O   THR B  83      55.332  16.817  36.754  1.00102.44           O
ATOM   4559  N   PRO B  84      54.511  17.476  34.796  1.00 64.76           N
ATOM   4560  CA  PRO B  84      53.150  17.354  35.252  1.00 64.76           C
ATOM   4561  CD  PRO B  84      54.654  18.494  33.769  1.00 64.76           C
ATOM   4562  CB  PRO B  84      52.299  18.064  34.203  1.00 64.76           C
ATOM   4563  CG  PRO B  84      53.255  19.112  33.605  1.00 64.76           C
ATOM   4564  C   PRO B  84      52.800  15.910  35.410  1.00 64.76           C
ATOM   4565  O   PRO B  84      53.313  15.097  34.643  1.00 64.76           O
ATOM   4566  N   VAL B  85      51.940  15.563  36.393  1.00 47.65           N
ATOM   4567  CA  VAL B  85      51.567  14.183  36.539  1.00 47.65           C
ATOM   4568  CB  VAL B  85      52.321  13.450  37.616  1.00 47.65           C
ATOM   4569  CG1 VAL B  85      53.816  13.443  37.257  1.00 47.65           C
ATOM   4570  CG2 VAL B  85      51.999  14.081  38.983  1.00 47.65           C
ATOM   4571  C   VAL B  85      50.115  14.090  36.906  1.00 47.65           C
ATOM   4572  O   VAL B  85      49.527  15.020  37.458  1.00 47.65           O
ATOM   4573  N   ILE B  86      49.491  12.949  36.543  1.00148.57           N
ATOM   4574  CA  ILE B  86      48.152  12.638  36.953  1.00148.57           C
ATOM   4575  CB  ILE B  86      47.172  12.568  35.803  1.00148.57           C
ATOM   4576  CG1 ILE B  86      45.717  12.526  36.308  1.00148.57           C
ATOM   4577  CG2 ILE B  86      47.566  11.407  34.877  1.00148.57           C
ATOM   4578  CD1 ILE B  86      45.361  11.291  37.135  1.00148.57           C
ATOM   4579  C   ILE B  86      48.269  11.298  37.626  1.00148.57           C
ATOM   4580  O   ILE B  86      48.830  10.358  37.066  1.00148.57           O
ATOM   4581  N   VAL B  87      47.762  11.168  38.868  1.00 50.21           N
ATOM   4582  CA  VAL B  87      47.921   9.915  39.555  1.00 50.21           C
ATOM   4583  CB  VAL B  87      48.680  10.049  40.845  1.00 50.21           C
ATOM   4584  CG1 VAL B  87      48.684   8.694  41.573  1.00 50.21           C
ATOM   4585  CG2 VAL B  87      50.088  10.570  40.513  1.00 50.21           C
ATOM   4586  C   VAL B  87      46.569   9.329  39.854  1.00 50.21           C
ATOM   4587  O   VAL B  87      45.575  10.044  39.978  1.00 50.21           O
ATOM   4588  N   ARG B  88      46.506   7.978  39.916  1.00134.76           N
ATOM   4589  CA  ARG B  88      45.301   7.267  40.243  1.00134.76           C
ATOM   4590  CB  ARG B  88      44.642   6.659  38.991  1.00134.76           C
ATOM   4591  CG  ARG B  88      43.552   5.611  39.224  1.00134.76           C
ATOM   4592  CD  ARG B  88      42.772   5.316  37.937  1.00134.76           C
ATOM   4593  NE  ARG B  88      42.005   4.047  38.095  1.00134.76           N
ATOM   4594  CZ  ARG B  88      40.808   4.033  38.744  1.00134.76           C
ATOM   4595  NH1 ARG B  88      40.386   5.141  39.413  1.00134.76           N
ATOM   4596  NH2 ARG B  88      40.029   2.916  38.731  1.00134.76           N
ATOM   4597  C   ARG B  88      45.658   6.159  41.193  1.00134.76           C
ATOM   4598  O   ARG B  88      46.580   5.385  40.941  1.00134.76           O
ATOM   4599  N   PHE B  89      44.923   6.066  42.322  1.00156.29           N
ATOM   4600  CA  PHE B  89      45.137   5.034  43.301  1.00156.29           C
ATOM   4601  CB  PHE B  89      45.308   5.574  44.733  1.00156.29           C
ATOM   4602  CG  PHE B  89      46.419   6.568  44.743  1.00156.29           C
ATOM   4603  CD1 PHE B  89      47.730   6.164  44.828  1.00156.29           C
ATOM   4604  CD2 PHE B  89      46.146   7.915  44.655  1.00156.29           C
ATOM   4605  CE1 PHE B  89      48.747   7.089  44.833  1.00156.29           C
ATOM   4606  CE2 PHE B  89      47.160   8.846  44.660  1.00156.29           C
ATOM   4607  CZ  PHE B  89      48.467   8.432  44.753  1.00156.29           C
ATOM   4608  C   PHE B  89      43.873   4.231  43.304  1.00156.29           C
ATOM   4609  O   PHE B  89      42.808   4.772  43.006  1.00156.29           O
ATOM   4610  N   SER B  90      43.950   2.922  43.636  1.00 66.01           N
ATOM   4611  CA  SER B  90      42.765   2.114  43.530  1.00 66.01           C
ATOM   4612  CB  SER B  90      42.446   1.746  42.073  1.00 66.01           C
ATOM   4613  OG  SER B  90      43.523   1.012  41.512  1.00 66.01           O
ATOM   4614  C   SER B  90      42.899   0.833  44.309  1.00 66.01           C
ATOM   4615  O   SER B  90      43.966   0.511  44.828  1.00 66.01           O
ATOM   4616  N   THR B  91      41.765   0.104  44.459  1.00 84.06           N
ATOM   4617  CA  THR B  91      41.736  -1.226  45.017  1.00 84.06           C
ATOM   4618  CB  THR B  91      40.484  -1.543  45.784  1.00 84.06           C
ATOM   4619  OG1 THR B  91      39.342  -1.443  44.948  1.00 84.06           O
ATOM   4620  CG2 THR B  91      40.377  -0.561  46.962  1.00 84.06           C
ATOM   4621  C   THR B  91      41.811  -2.131  43.813  1.00 84.06           C
ATOM   4622  O   THR B  91      42.040  -1.635  42.712  1.00 84.06           O
ATOM   4623  N   VAL B  92      41.862  -3.471  44.007  1.00127.44           N
ATOM   4624  CA  VAL B  92      41.900  -4.404  42.903  1.00127.44           C
ATOM   4625  CB  VAL B  92      42.834  -5.537  43.215  1.00127.44           C
ATOM   4626  CG1 VAL B  92      42.792  -6.558  42.069  1.00127.44           C
ATOM   4627  CG2 VAL B  92      44.231  -4.957  43.490  1.00127.44           C
ATOM   4628  C   VAL B  92      40.626  -5.064  42.417  1.00127.44           C
ATOM   4629  O   VAL B  92      40.171  -4.879  41.288  1.00127.44           O
ATOM   4630  N   ILE B  93      40.056  -5.906  43.311  1.00140.32           N
ATOM   4631  CA  ILE B  93      39.053  -6.899  42.993  1.00140.32           C
ATOM   4632  CB  ILE B  93      38.931  -7.938  44.070  1.00140.32           C
ATOM   4633  CG1 ILE B  93      40.277  -8.648  44.291  1.00140.32           C
ATOM   4634  CG2 ILE B  93      37.793  -8.892  43.670  1.00140.32           C
ATOM   4635  CD1 ILE B  93      40.810  -9.348  43.042  1.00140.32           C
ATOM   4636  C   ILE B  93      37.663  -6.412  42.740  1.00140.32           C
ATOM   4637  O   ILE B  93      37.042  -6.773  41.741  1.00140.32           O
ATOM   4638  N   HIS B  94      37.126  -5.588  43.651  1.00 83.95           N
ATOM   4639  CA  HIS B  94      35.737  -5.258  43.552  1.00 83.95           C
ATOM   4640  ND1 HIS B  94      35.907  -7.066  46.279  1.00 83.95           N
ATOM   4641  CG  HIS B  94      34.902  -6.438  45.576  1.00 83.95           C
ATOM   4642  CB  HIS B  94      35.044  -5.093  44.916  1.00 83.95           C
ATOM   4643  NE2 HIS B  94      34.168  -8.455  46.279  1.00 83.95           N
ATOM   4644  CD2 HIS B  94      33.846  -7.300  45.587  1.00 83.95           C
ATOM   4645  CE1 HIS B  94      35.415  -8.268  46.675  1.00 83.95           C
ATOM   4646  C   HIS B  94      35.500  -4.086  42.649  1.00 83.95           C
ATOM   4647  O   HIS B  94      36.425  -3.408  42.209  1.00 83.95           O
ATOM   4648  N   GLU B  95      34.208  -3.865  42.335  1.00107.98           N
ATOM   4649  CA  GLU B  95      33.708  -2.935  41.360  1.00107.98           C
ATOM   4650  CB  GLU B  95      32.273  -3.299  40.930  1.00107.98           C
ATOM   4651  CG  GLU B  95      32.059  -4.784  40.598  1.00107.98           C
ATOM   4652  CD  GLU B  95      32.437  -5.072  39.153  1.00107.98           C
ATOM   4653  OE1 GLU B  95      31.598  -4.791  38.255  1.00107.98           O
ATOM   4654  OE2 GLU B  95      33.570  -5.576  38.926  1.00107.98           O
ATOM   4655  C   GLU B  95      33.616  -1.544  41.916  1.00107.98           C
ATOM   4656  O   GLU B  95      33.920  -1.280  43.078  1.00107.98           O
ATOM   4657  N   ARG B  96      33.174  -0.606  41.048  1.00184.11           N
ATOM   4658  CA  ARG B  96      33.045   0.780  41.396  1.00184.11           C
ATOM   4659  CB  ARG B  96      32.464   1.637  40.257  1.00184.11           C
ATOM   4660  CG  ARG B  96      33.368   1.655  39.023  1.00184.11           C
ATOM   4661  CD  ARG B  96      33.017   2.730  37.994  1.00184.11           C
ATOM   4662  NE  ARG B  96      31.729   2.362  37.341  1.00184.11           N
ATOM   4663  CZ  ARG B  96      31.138   3.255  36.495  1.00184.11           C
ATOM   4664  NH1 ARG B  96      31.712   4.479  36.299  1.00184.11           N
ATOM   4665  NH2 ARG B  96      29.984   2.929  35.843  1.00184.11           N
ATOM   4666  C   ARG B  96      32.139   0.887  42.581  1.00184.11           C
ATOM   4667  O   ARG B  96      31.187   0.133  42.705  1.00184.11           O
ATOM   4668  N   GLY B  97      32.430   1.789  43.535  1.00 28.97           N
ATOM   4669  CA  GLY B  97      31.531   1.968  44.641  1.00 28.97           C
ATOM   4670  C   GLY B  97      31.715   0.881  45.656  1.00 28.97           C
ATOM   4671  O   GLY B  97      30.932   0.770  46.601  1.00 28.97           O
ATOM   4672  N   SER B  98      32.752   0.040  45.489  1.00 43.83           N
ATOM   4673  CA  SER B  98      33.022  -0.998  46.442  1.00 43.83           C
ATOM   4674  CB  SER B  98      33.976  -2.084  45.913  1.00 43.83           C
ATOM   4675  OG  SER B  98      34.148  -3.100  46.890  1.00 43.83           O
ATOM   4676  C   SER B  98      33.659  -0.345  47.635  1.00 43.83           C
ATOM   4677  O   SER B  98      34.206   0.751  47.528  1.00 43.83           O
ATOM   4678  N   PRO B  99      33.612  -0.967  48.786  1.00155.24           N
ATOM   4679  CA  PRO B  99      34.215  -0.354  49.932  1.00155.24           C
ATOM   4680  CD  PRO B  99      32.505  -1.826  49.161  1.00155.24           C
ATOM   4681  CB  PRO B  99      33.697  -1.120  51.154  1.00155.24           C
ATOM   4682  CG  PRO B  99      32.896  -2.301  50.568  1.00155.24           C
ATOM   4683  C   PRO B  99      35.705  -0.287  49.786  1.00155.24           C
ATOM   4684  O   PRO B  99      36.301  -1.149  49.143  1.00155.24           O
ATOM   4685  N   GLU B 100      36.297   0.800  50.305  1.00123.28           N
ATOM   4686  CA  GLU B 100      37.706   1.076  50.314  1.00123.28           C
ATOM   4687  CB  GLU B 100      38.030   2.576  50.307  1.00123.28           C
ATOM   4688  CG  GLU B 100      37.733   3.154  48.919  1.00123.28           C
ATOM   4689  CD  GLU B 100      38.118   4.621  48.865  1.00123.28           C
ATOM   4690  OE1 GLU B 100      37.437   5.443  49.532  1.00123.28           O
ATOM   4691  OE2 GLU B 100      39.099   4.937  48.142  1.00123.28           O
ATOM   4692  C   GLU B 100      38.424   0.364  51.429  1.00123.28           C
ATOM   4693  O   GLU B 100      39.641   0.474  51.553  1.00123.28           O
ATOM   4694  N   THR B 101      37.666  -0.233  52.362  1.00101.77           N
ATOM   4695  CA  THR B 101      38.122  -0.937  53.536  1.00101.77           C
ATOM   4696  CB  THR B 101      37.087  -0.977  54.621  1.00101.77           C
ATOM   4697  OG1 THR B 101      35.903  -1.596  54.144  1.00101.77           O
ATOM   4698  CG2 THR B 101      36.797   0.461  55.084  1.00101.77           C
ATOM   4699  C   THR B 101      38.594  -2.347  53.286  1.00101.77           C
ATOM   4700  O   THR B 101      39.081  -2.984  54.218  1.00101.77           O
ATOM   4701  N   LEU B 102      38.355  -2.919  52.088  1.00 74.61           N
ATOM   4702  CA  LEU B 102      38.658  -4.306  51.828  1.00 74.61           C
ATOM   4703  CB  LEU B 102      37.937  -4.868  50.588  1.00 74.61           C
ATOM   4704  CG  LEU B 102      36.400  -4.726  50.633  1.00 74.61           C
ATOM   4705  CD1 LEU B 102      35.734  -5.542  49.512  1.00 74.61           C
ATOM   4706  CD2 LEU B 102      35.830  -5.028  52.027  1.00 74.61           C
ATOM   4707  C   LEU B 102      40.128  -4.562  51.637  1.00 74.61           C
ATOM   4708  O   LEU B 102      40.906  -3.680  51.273  1.00 74.61           O
ATOM   4709  N   ARG B 103      40.525  -5.826  51.919  1.00115.44           N
ATOM   4710  CA  ARG B 103      41.860  -6.348  51.786  1.00115.44           C
ATOM   4711  CB  ARG B 103      41.975  -7.723  52.471  1.00115.44           C
ATOM   4712  CG  ARG B 103      43.277  -8.490  52.233  1.00115.44           C
ATOM   4713  CD  ARG B 103      43.297  -9.849  52.943  1.00115.44           C
ATOM   4714  NE  ARG B 103      43.281  -9.566  54.406  1.00115.44           N
ATOM   4715  CZ  ARG B 103      42.559 -10.328  55.281  1.00115.44           C
ATOM   4716  NH1 ARG B 103      41.842 -11.406  54.847  1.00115.44           N
ATOM   4717  NH2 ARG B 103      42.555  -9.996  56.605  1.00115.44           N
ATOM   4718  C   ARG B 103      42.133  -6.547  50.323  1.00115.44           C
ATOM   4719  O   ARG B 103      41.420  -7.286  49.645  1.00115.44           O
ATOM   4720  N   ASP B 104      43.199  -5.894  49.812  1.00117.26           N
ATOM   4721  CA  ASP B 104      43.581  -5.946  48.425  1.00117.26           C
ATOM   4722  CB  ASP B 104      42.731  -5.080  47.470  1.00117.26           C
ATOM   4723  CG  ASP B 104      41.406  -5.717  47.086  1.00117.26           C
ATOM   4724  OD1 ASP B 104      41.310  -6.972  47.095  1.00117.26           O
ATOM   4725  OD2 ASP B 104      40.474  -4.939  46.748  1.00117.26           O
ATOM   4726  C   ASP B 104      44.897  -5.248  48.330  1.00117.26           C
ATOM   4727  O   ASP B 104      45.281  -4.488  49.218  1.00117.26           O
ATOM   4728  N   PRO B 105      45.597  -5.481  47.253  1.00169.80           N
ATOM   4729  CA  PRO B 105      46.773  -4.717  46.965  1.00169.80           C
ATOM   4730  CD  PRO B 105      45.540  -6.728  46.513  1.00169.80           C
ATOM   4731  CB  PRO B 105      47.475  -5.446  45.815  1.00169.80           C
ATOM   4732  CG  PRO B 105      46.434  -6.458  45.293  1.00169.80           C
ATOM   4733  C   PRO B 105      46.206  -3.374  46.613  1.00169.80           C
ATOM   4734  O   PRO B 105      45.003  -3.298  46.371  1.00169.80           O
ATOM   4735  N   ARG B 106      47.008  -2.295  46.646  1.00112.64           N
ATOM   4736  CA  ARG B 106      46.484  -1.007  46.278  1.00112.64           C
ATOM   4737  CB  ARG B 106      46.674   0.075  47.354  1.00112.64           C
ATOM   4738  CG  ARG B 106      45.771  -0.096  48.573  1.00112.64           C
ATOM   4739  CD  ARG B 106      44.289  -0.168  48.214  1.00112.64           C
ATOM   4740  NE  ARG B 106      43.514   0.057  49.465  1.00112.64           N
ATOM   4741  CZ  ARG B 106      42.878  -0.978  50.087  1.00112.64           C
ATOM   4742  NH1 ARG B 106      42.922  -2.232  49.553  1.00112.64           N
ATOM   4743  NH2 ARG B 106      42.185  -0.747  51.240  1.00112.64           N
ATOM   4744  C   ARG B 106      47.253  -0.528  45.088  1.00112.64           C
ATOM   4745  O   ARG B 106      48.481  -0.476  45.118  1.00112.64           O
ATOM   4746  N   GLY B 107      46.533  -0.145  44.012  1.00 37.76           N
ATOM   4747  CA  GLY B 107      47.163   0.312  42.804  1.00 37.76           C
ATOM   4748  C   GLY B 107      47.728   1.685  43.005  1.00 37.76           C
ATOM   4749  O   GLY B 107      47.162   2.516  43.715  1.00 37.76           O
ATOM   4750  N   PHE B 108      48.878   1.946  42.346  1.00168.12           N
ATOM   4751  CA  PHE B 108      49.561   3.206  42.427  1.00168.12           C
ATOM   4752  CB  PHE B 108      50.841   3.053  43.278  1.00168.12           C
ATOM   4753  CG  PHE B 108      51.383   4.348  43.789  1.00168.12           C
ATOM   4754  CD1 PHE B 108      52.037   5.231  42.963  1.00168.12           C
ATOM   4755  CD2 PHE B 108      51.269   4.654  45.128  1.00168.12           C
ATOM   4756  CE1 PHE B 108      52.546   6.408  43.461  1.00168.12           C
ATOM   4757  CE2 PHE B 108      51.777   5.828  45.632  1.00168.12           C
ATOM   4758  CZ  PHE B 108      52.412   6.714  44.795  1.00168.12           C
ATOM   4759  C   PHE B 108      49.963   3.524  41.008  1.00168.12           C
ATOM   4760  O   PHE B 108      50.962   2.998  40.518  1.00168.12           O
ATOM   4761  N   ALA B 109      49.221   4.415  40.311  1.00 47.30           N
ATOM   4762  CA  ALA B 109      49.531   4.682  38.925  1.00 47.30           C
ATOM   4763  CB  ALA B 109      48.373   4.377  37.959  1.00 47.30           C
ATOM   4764  C   ALA B 109      49.859   6.142  38.756  1.00 47.30           C
ATOM   4765  O   ALA B 109      49.205   7.008  39.342  1.00 47.30           O
ATOM   4766  N   VAL B 110      50.900   6.450  37.945  1.00 51.11           N
ATOM   4767  CA  VAL B 110      51.273   7.822  37.721  1.00 51.11           C
ATOM   4768  CB  VAL B 110      52.466   8.243  38.532  1.00 51.11           C
ATOM   4769  CG1 VAL B 110      52.840   9.688  38.162  1.00 51.11           C
ATOM   4770  CG2 VAL B 110      52.128   8.046  40.019  1.00 51.11           C
ATOM   4771  C   VAL B 110      51.625   8.028  36.273  1.00 51.11           C
ATOM   4772  O   VAL B 110      52.471   7.332  35.712  1.00 51.11           O
ATOM   4773  N   LYS B 111      50.992   9.039  35.643  1.00113.34           N
ATOM   4774  CA  LYS B 111      51.227   9.367  34.264  1.00113.34           C
ATOM   4775  CB  LYS B 111      49.923   9.683  33.511  1.00113.34           C
ATOM   4776  CG  LYS B 111      50.079   9.888  32.004  1.00113.34           C
ATOM   4777  CD  LYS B 111      48.738   9.894  31.264  1.00113.34           C
ATOM   4778  CE  LYS B 111      48.096   8.510  31.123  1.00113.34           C
ATOM   4779  NZ  LYS B 111      48.800   7.730  30.081  1.00113.34           N
ATOM   4780  C   LYS B 111      52.078  10.604  34.242  1.00113.34           C
ATOM   4781  O   LYS B 111      51.726  11.623  34.836  1.00113.34           O
ATOM   4782  N   PHE B 112      53.235  10.533  33.549  1.00 76.63           N
ATOM   4783  CA  PHE B 112      54.145  11.644  33.462  1.00 76.63           C
ATOM   4784  CB  PHE B 112      55.622  11.213  33.587  1.00 76.63           C
ATOM   4785  CG  PHE B 112      55.910  10.663  34.947  1.00 76.63           C
ATOM   4786  CD1 PHE B 112      55.468   9.412  35.316  1.00 76.63           C
ATOM   4787  CD2 PHE B 112      56.658  11.388  35.846  1.00 76.63           C
ATOM   4788  CE1 PHE B 112      55.744   8.908  36.568  1.00 76.63           C
ATOM   4789  CE2 PHE B 112      56.938  10.891  37.097  1.00 76.63           C
ATOM   4790  CZ  PHE B 112      56.483   9.647  37.461  1.00 76.63           C
ATOM   4791  C   PHE B 112      54.012  12.212  32.079  1.00 76.63           C
ATOM   4792  O   PHE B 112      54.177  11.492  31.095  1.00 76.63           O
ATOM   4793  N   TYR B 113      53.733  13.529  31.953  1.00165.75           N
ATOM   4794  CA  TYR B 113      53.645  14.075  30.626  1.00165.75           C
ATOM   4795  CB  TYR B 113      52.594  15.171  30.431  1.00165.75           C
ATOM   4796  CG  TYR B 113      51.295  14.562  30.789  1.00165.75           C
ATOM   4797  CD1 TYR B 113      50.559  13.856  29.865  1.00165.75           C
ATOM   4798  CD2 TYR B 113      50.837  14.692  32.077  1.00165.75           C
ATOM   4799  CE1 TYR B 113      49.358  13.298  30.234  1.00165.75           C
ATOM   4800  CE2 TYR B 113      49.641  14.137  32.448  1.00165.75           C
ATOM   4801  CZ  TYR B 113      48.904  13.443  31.525  1.00165.75           C
ATOM   4802  OH  TYR B 113      47.677  12.877  31.921  1.00165.75           O
ATOM   4803  C   TYR B 113      54.962  14.720  30.376  1.00165.75           C
ATOM   4804  O   TYR B 113      55.211  15.847  30.802  1.00165.75           O
ATOM   4805  N   THR B 114      55.825  13.993  29.646  1.00 64.83           N
ATOM   4806  CA  THR B 114      57.189  14.368  29.417  1.00 64.83           C
ATOM   4807  CB  THR B 114      58.080  13.140  29.399  1.00 64.83           C
ATOM   4808  OG1 THR B 114      57.965  12.449  30.633  1.00 64.83           O
ATOM   4809  CG2 THR B 114      59.556  13.497  29.152  1.00 64.83           C
ATOM   4810  C   THR B 114      57.325  15.083  28.105  1.00 64.83           C
ATOM   4811  O   THR B 114      56.444  15.033  27.249  1.00 64.83           O
ATOM   4812  N   ARG B 115      58.470  15.777  27.937  1.00176.70           N
ATOM   4813  CA  ARG B 115      58.836  16.468  26.735  1.00176.70           C
ATOM   4814  CB  ARG B 115      60.248  17.090  26.802  1.00176.70           C
ATOM   4815  CG  ARG B 115      60.404  18.446  27.502  1.00176.70           C
ATOM   4816  CD  ARG B 115      60.042  18.465  28.986  1.00176.70           C
ATOM   4817  NE  ARG B 115      58.575  18.695  29.062  1.00176.70           N
ATOM   4818  CZ  ARG B 115      57.970  18.803  30.279  1.00176.70           C
ATOM   4819  NH1 ARG B 115      58.701  18.626  31.417  1.00176.70           N
ATOM   4820  NH2 ARG B 115      56.639  19.096  30.351  1.00176.70           N
ATOM   4821  C   ARG B 115      58.929  15.446  25.638  1.00176.70           C
ATOM   4822  O   ARG B 115      58.625  15.738  24.485  1.00176.70           O
ATOM   4823  N   GLU B 116      59.467  14.256  25.970  1.00137.80           N
ATOM   4824  CA  GLU B 116      59.687  13.114  25.117  1.00137.80           C
ATOM   4825  CB  GLU B 116      60.970  12.324  25.443  1.00137.80           C
ATOM   4826  CG  GLU B 116      62.219  13.085  24.973  1.00137.80           C
ATOM   4827  CD  GLU B 116      63.402  12.131  24.920  1.00137.80           C
ATOM   4828  OE1 GLU B 116      63.328  11.060  25.577  1.00137.80           O
ATOM   4829  OE2 GLU B 116      64.395  12.457  24.216  1.00137.80           O
ATOM   4830  C   GLU B 116      58.511  12.185  24.953  1.00137.80           C
ATOM   4831  O   GLU B 116      58.681  11.127  24.353  1.00137.80           O
ATOM   4832  N   GLY B 117      57.361  12.436  25.618  1.00 56.58           N
ATOM   4833  CA  GLY B 117      56.209  11.578  25.467  1.00 56.58           C
ATOM   4834  C   GLY B 117      55.701  11.253  26.841  1.00 56.58           C
ATOM   4835  O   GLY B 117      56.264  11.699  27.839  1.00 56.58           O
ATOM   4836  N   ASN B 118      54.600  10.479  26.953  1.00155.36           N
ATOM   4837  CA  ASN B 118      54.179  10.178  28.288  1.00155.36           C
ATOM   4838  CB  ASN B 118      52.670  10.351  28.566  1.00155.36           C
ATOM   4839  CG  ASN B 118      51.855   9.646  27.512  1.00155.36           C
ATOM   4840  OD1 ASN B 118      52.375   8.836  26.750  1.00155.36           O
ATOM   4841  ND2 ASN B 118      50.543   9.994  27.436  1.00155.36           N
ATOM   4842  C   ASN B 118      54.740   8.873  28.765  1.00155.36           C
ATOM   4843  O   ASN B 118      54.966   7.939  27.994  1.00155.36           O
ATOM   4844  N   PHE B 119      55.052   8.825  30.080  1.00 77.32           N
ATOM   4845  CA  PHE B 119      55.564   7.639  30.703  1.00 77.32           C
ATOM   4846  CB  PHE B 119      57.010   7.819  31.213  1.00 77.32           C
ATOM   4847  CG  PHE B 119      57.489   6.553  31.840  1.00 77.32           C
ATOM   4848  CD1 PHE B 119      57.544   5.394  31.104  1.00 77.32           C
ATOM   4849  CD2 PHE B 119      57.933   6.531  33.143  1.00 77.32           C
ATOM   4850  CE1 PHE B 119      57.996   4.222  31.663  1.00 77.32           C
ATOM   4851  CE2 PHE B 119      58.389   5.362  33.708  1.00 77.32           C
ATOM   4852  CZ  PHE B 119      58.415   4.203  32.970  1.00 77.32           C
ATOM   4853  C   PHE B 119      54.639   7.306  31.840  1.00 77.32           C
ATOM   4854  O   PHE B 119      54.254   8.164  32.637  1.00 77.32           O
ATOM   4855  N   ASP B 120      54.231   6.025  31.925  1.00 72.82           N
ATOM   4856  CA  ASP B 120      53.300   5.625  32.941  1.00 72.82           C
ATOM   4857  CB  ASP B 120      52.101   4.827  32.406  1.00 72.82           C
ATOM   4858  CG  ASP B 120      51.172   5.761  31.651  1.00 72.82           C
ATOM   4859  OD1 ASP B 120      51.357   7.003  31.750  1.00 72.82           O
ATOM   4860  OD2 ASP B 120      50.268   5.239  30.945  1.00 72.82           O
ATOM   4861  C   ASP B 120      53.965   4.723  33.927  1.00 72.82           C
ATOM   4862  O   ASP B 120      54.589   3.727  33.560  1.00 72.82           O
ATOM   4863  N   LEU B 121      53.853   5.081  35.221  1.00111.13           N
ATOM   4864  CA  LEU B 121      54.281   4.200  36.264  1.00111.13           C
ATOM   4865  CB  LEU B 121      54.900   4.918  37.481  1.00111.13           C
ATOM   4866  CG  LEU B 121      55.388   3.994  38.624  1.00111.13           C
ATOM   4867  CD1 LEU B 121      54.234   3.312  39.376  1.00111.13           C
ATOM   4868  CD2 LEU B 121      56.434   2.993  38.112  1.00111.13           C
ATOM   4869  C   LEU B 121      53.009   3.547  36.711  1.00111.13           C
ATOM   4870  O   LEU B 121      52.056   4.234  37.079  1.00111.13           O
ATOM   4871  N   VAL B 122      52.942   2.203  36.631  1.00 78.04           N
ATOM   4872  CA  VAL B 122      51.763   1.505  37.055  1.00 78.04           C
ATOM   4873  CB  VAL B 122      51.105   0.769  35.916  1.00 78.04           C
ATOM   4874  CG1 VAL B 122      49.872   0.024  36.450  1.00 78.04           C
ATOM   4875  CG2 VAL B 122      50.806   1.767  34.786  1.00 78.04           C
ATOM   4876  C   VAL B 122      52.231   0.449  38.012  1.00 78.04           C
ATOM   4877  O   VAL B 122      52.696  -0.608  37.584  1.00 78.04           O
ATOM   4878  N   GLY B 123      52.062   0.682  39.331  1.00 58.28           N
ATOM   4879  CA  GLY B 123      52.554  -0.241  40.320  1.00 58.28           C
ATOM   4880  C   GLY B 123      51.497  -0.431  41.374  1.00 58.28           C
ATOM   4881  O   GLY B 123      50.385   0.082  41.258  1.00 58.28           O
ATOM   4882  N   ASN B 124      51.828  -1.223  42.419  1.00 63.09           N
ATOM   4883  CA  ASN B 124      50.964  -1.469  43.542  1.00 63.09           C
ATOM   4884  CB  ASN B 124      50.521  -2.933  43.697  1.00 63.09           C
ATOM   4885  CG  ASN B 124      49.420  -3.216  42.686  1.00 63.09           C
ATOM   4886  OD1 ASN B 124      48.495  -2.421  42.522  1.00 63.09           O
ATOM   4887  ND2 ASN B 124      49.513  -4.383  41.995  1.00 63.09           N
ATOM   4888  C   ASN B 124      51.763  -1.135  44.764  1.00 63.09           C
ATOM   4889  O   ASN B 124      52.973  -0.940  44.679  1.00 63.09           O
ATOM   4890  N   ASN B 125      51.097  -1.004  45.931  1.00 54.20           N
ATOM   4891  CA  ASN B 125      51.824  -0.709  47.134  1.00 54.20           C
ATOM   4892  CB  ASN B 125      50.921  -0.360  48.335  1.00 54.20           C
ATOM   4893  CG  ASN B 125      49.982  -1.519  48.622  1.00 54.20           C
ATOM   4894  OD1 ASN B 125      49.579  -2.249  47.719  1.00 54.20           O
ATOM   4895  ND2 ASN B 125      49.602  -1.680  49.916  1.00 54.20           N
ATOM   4896  C   ASN B 125      52.715  -1.867  47.502  1.00 54.20           C
ATOM   4897  O   ASN B 125      53.881  -1.656  47.833  1.00 54.20           O
ATOM   4898  N   PHE B 126      52.203  -3.119  47.435  1.00 71.35           N
ATOM   4899  CA  PHE B 126      52.974  -4.287  47.799  1.00 71.35           C
ATOM   4900  CB  PHE B 126      52.143  -5.586  47.868  1.00 71.35           C
ATOM   4901  CG  PHE B 126      51.090  -5.467  48.919  1.00 71.35           C
ATOM   4902  CD1 PHE B 126      49.887  -4.866  48.625  1.00 71.35           C
ATOM   4903  CD2 PHE B 126      51.291  -5.962  50.187  1.00 71.35           C
ATOM   4904  CE1 PHE B 126      48.903  -4.750  49.578  1.00 71.35           C
ATOM   4905  CE2 PHE B 126      50.306  -5.845  51.138  1.00 71.35           C
ATOM   4906  CZ  PHE B 126      49.109  -5.240  50.843  1.00 71.35           C
ATOM   4907  C   PHE B 126      54.035  -4.510  46.750  1.00 71.35           C
ATOM   4908  O   PHE B 126      53.797  -4.319  45.559  1.00 71.35           O
ATOM   4909  N   PRO B 127      55.208  -4.904  47.194  1.00110.63           N
ATOM   4910  CA  PRO B 127      56.384  -5.089  46.361  1.00110.63           C
ATOM   4911  CD  PRO B 127      55.558  -4.725  48.591  1.00110.63           C
ATOM   4912  CB  PRO B 127      57.582  -5.005  47.308  1.00110.63           C
ATOM   4913  CG  PRO B 127      56.994  -5.255  48.705  1.00110.63           C
ATOM   4914  C   PRO B 127      56.442  -6.324  45.504  1.00110.63           C
ATOM   4915  O   PRO B 127      57.395  -6.452  44.731  1.00110.63           O
ATOM   4916  N   VAL B 128      55.483  -7.258  45.637  1.00144.26           N
ATOM   4917  CA  VAL B 128      55.594  -8.510  44.938  1.00144.26           C
ATOM   4918  CB  VAL B 128      55.890  -9.614  45.930  1.00144.26           C
ATOM   4919  CG1 VAL B 128      56.066 -10.959  45.226  1.00144.26           C
ATOM   4920  CG2 VAL B 128      57.080  -9.210  46.798  1.00144.26           C
ATOM   4921  C   VAL B 128      54.240  -8.810  44.363  1.00144.26           C
ATOM   4922  O   VAL B 128      53.280  -8.096  44.638  1.00144.26           O
ATOM   4923  N   PHE B 129      54.128  -9.865  43.525  1.00131.22           N
ATOM   4924  CA  PHE B 129      52.849 -10.239  43.002  1.00131.22           C
ATOM   4925  CB  PHE B 129      52.721  -9.929  41.495  1.00131.22           C
ATOM   4926  CG  PHE B 129      51.284  -9.706  41.144  1.00131.22           C
ATOM   4927  CD1 PHE B 129      50.706  -8.484  41.409  1.00131.22           C
ATOM   4928  CD2 PHE B 129      50.507 -10.686  40.571  1.00131.22           C
ATOM   4929  CE1 PHE B 129      49.390  -8.237  41.099  1.00131.22           C
ATOM   4930  CE2 PHE B 129      49.188 -10.446  40.255  1.00131.22           C
ATOM   4931  CZ  PHE B 129      48.625  -9.221  40.523  1.00131.22           C
ATOM   4932  C   PHE B 129      52.667 -11.718  43.254  1.00131.22           C
ATOM   4933  O   PHE B 129      53.610 -12.421  43.613  1.00131.22           O
ATOM   4934  N   PHE B 130      51.414 -12.207  43.115  1.00155.22           N
ATOM   4935  CA  PHE B 130      50.993 -13.564  43.371  1.00155.22           C
ATOM   4936  CB  PHE B 130      49.465 -13.754  43.323  1.00155.22           C
ATOM   4937  CG  PHE B 130      48.820 -12.905  44.364  1.00155.22           C
ATOM   4938  CD1 PHE B 130      48.788 -13.305  45.680  1.00155.22           C
ATOM   4939  CD2 PHE B 130      48.262 -11.696  44.019  1.00155.22           C
ATOM   4940  CE1 PHE B 130      48.187 -12.518  46.634  1.00155.22           C
ATOM   4941  CE2 PHE B 130      47.659 -10.904  44.968  1.00155.22           C
ATOM   4942  CZ  PHE B 130      47.625 -11.315  46.279  1.00155.22           C
ATOM   4943  C   PHE B 130      51.544 -14.530  42.357  1.00155.22           C
ATOM   4944  O   PHE B 130      51.727 -15.708  42.662  1.00155.22           O
ATOM   4945  N   ILE B 131      51.731 -14.076  41.102  1.00108.03           N
ATOM   4946  CA  ILE B 131      52.126 -14.934  40.012  1.00108.03           C
ATOM   4947  CB  ILE B 131      50.980 -15.207  39.081  1.00108.03           C
ATOM   4948  CG1 ILE B 131      50.488 -13.876  38.482  1.00108.03           C
ATOM   4949  CG2 ILE B 131      49.896 -15.982  39.850  1.00108.03           C
ATOM   4950  CD1 ILE B 131      49.452 -14.025  37.369  1.00108.03           C
ATOM   4951  C   ILE B 131      53.209 -14.259  39.206  1.00108.03           C
ATOM   4952  O   ILE B 131      53.467 -13.063  39.330  1.00108.03           O
ATOM   4953  N   ARG B 132      53.981 -15.101  38.495  1.00321.35           N
ATOM   4954  CA  ARG B 132      55.127 -14.837  37.665  1.00321.35           C
ATOM   4955  CB  ARG B 132      56.077 -16.028  37.836  1.00321.35           C
ATOM   4956  CG  ARG B 132      57.486 -15.881  37.290  1.00321.35           C
ATOM   4957  CD  ARG B 132      58.333 -17.092  37.685  1.00321.35           C
ATOM   4958  NE  ARG B 132      58.360 -17.127  39.178  1.00321.35           N
ATOM   4959  CZ  ARG B 132      57.892 -18.196  39.892  1.00321.35           C
ATOM   4960  NH1 ARG B 132      57.357 -19.284  39.267  1.00321.35           N
ATOM   4961  NH2 ARG B 132      57.959 -18.162  41.254  1.00321.35           N
ATOM   4962  C   ARG B 132      54.921 -14.606  36.189  1.00321.35           C
ATOM   4963  O   ARG B 132      55.835 -14.118  35.523  1.00321.35           O
ATOM   4964  N   ASP B 133      53.803 -15.089  35.612  1.00 92.10           N
ATOM   4965  CA  ASP B 133      53.626 -15.072  34.178  1.00 92.10           C
ATOM   4966  CB  ASP B 133      53.792 -16.489  33.580  1.00 92.10           C
ATOM   4967  CG  ASP B 133      53.792 -16.455  32.057  1.00 92.10           C
ATOM   4968  OD1 ASP B 133      52.776 -16.003  31.466  1.00 92.10           O
ATOM   4969  OD2 ASP B 133      54.812 -16.891  31.460  1.00 92.10           O
ATOM   4970  C   ASP B 133      52.232 -14.584  33.878  1.00 92.10           C
ATOM   4971  O   ASP B 133      51.286 -14.879  34.605  1.00 92.10           O
ATOM   4972  N   GLY B 134      52.066 -13.840  32.767  1.00 51.13           N
ATOM   4973  CA  GLY B 134      50.807 -13.261  32.368  1.00 51.13           C
ATOM   4974  C   GLY B 134      49.770 -14.325  32.114  1.00 51.13           C
ATOM   4975  O   GLY B 134      48.573 -14.079  32.259  1.00 51.13           O
ATOM   4976  N   MET B 135      50.190 -15.542  31.726  1.00 89.20           N
ATOM   4977  CA  MET B 135      49.275 -16.590  31.345  1.00 89.20           C
ATOM   4978  CB  MET B 135      49.981 -17.923  31.027  1.00 89.20           C
ATOM   4979  CG  MET B 135      49.004 -19.081  30.793  1.00 89.20           C
ATOM   4980  SD  MET B 135      48.020 -18.993  29.266  1.00 89.20           S
ATOM   4981  CE  MET B 135      49.357 -19.550  28.166  1.00 89.20           C
ATOM   4982  C   MET B 135      48.294 -16.867  32.455  1.00 89.20           C
ATOM   4983  O   MET B 135      47.162 -17.268  32.195  1.00 89.20           O
ATOM   4984  N   LYS B 136      48.734 -16.751  33.717  1.00183.54           N
ATOM   4985  CA  LYS B 136      47.973 -17.022  34.912  1.00183.54           C
ATOM   4986  CB  LYS B 136      48.889 -17.294  36.114  1.00183.54           C
ATOM   4987  CG  LYS B 136      49.624 -18.630  36.012  1.00183.54           C
ATOM   4988  CD  LYS B 136      48.700 -19.847  36.108  1.00183.54           C
ATOM   4989  CE  LYS B 136      48.048 -20.269  34.792  1.00183.54           C
ATOM   4990  NZ  LYS B 136      47.261 -21.508  34.993  1.00183.54           N
ATOM   4991  C   LYS B 136      46.983 -15.960  35.337  1.00183.54           C
ATOM   4992  O   LYS B 136      46.116 -16.247  36.160  1.00183.54           O
ATOM   4993  N   PHE B 137      47.104 -14.705  34.859  1.00 93.75           N
ATOM   4994  CA  PHE B 137      46.383 -13.577  35.408  1.00 93.75           C
ATOM   4995  CB  PHE B 137      46.746 -12.254  34.711  1.00 93.75           C
ATOM   4996  CG  PHE B 137      45.988 -11.156  35.378  1.00 93.75           C
ATOM   4997  CD1 PHE B 137      46.383 -10.691  36.612  1.00 93.75           C
ATOM   4998  CD2 PHE B 137      44.896 -10.579  34.771  1.00 93.75           C
ATOM   4999  CE1 PHE B 137      45.697  -9.675  37.235  1.00 93.75           C
ATOM   5000  CE2 PHE B 137      44.206  -9.562  35.388  1.00 93.75           C
ATOM   5001  CZ  PHE B 137      44.607  -9.106  36.620  1.00 93.75           C
ATOM   5002  C   PHE B 137      44.886 -13.707  35.371  1.00 93.75           C
ATOM   5003  O   PHE B 137      44.240 -13.421  36.381  1.00 93.75           O
ATOM   5004  N   PRO B 138      44.272 -14.089  34.288  1.00 83.63           N
ATOM   5005  CA  PRO B 138      42.840 -14.165  34.289  1.00 83.63           C
ATOM   5006  CD  PRO B 138      44.813 -13.855  32.961  1.00 83.63           C
ATOM   5007  CB  PRO B 138      42.447 -14.446  32.842  1.00 83.63           C
ATOM   5008  CG  PRO B 138      43.585 -13.787  32.035  1.00 83.63           C
ATOM   5009  C   PRO B 138      42.366 -15.170  35.290  1.00 83.63           C
ATOM   5010  O   PRO B 138      41.358 -14.923  35.950  1.00 83.63           O
ATOM   5011  N   ASP B 139      43.092 -16.295  35.429  1.00 75.94           N
ATOM   5012  CA  ASP B 139      42.736 -17.334  36.352  1.00 75.94           C
ATOM   5013  CB  ASP B 139      43.737 -18.506  36.330  1.00 75.94           C
ATOM   5014  CG  ASP B 139      43.600 -19.275  35.023  1.00 75.94           C
ATOM   5015  OD1 ASP B 139      42.523 -19.891  34.810  1.00 75.94           O
ATOM   5016  OD2 ASP B 139      44.577 -19.268  34.227  1.00 75.94           O
ATOM   5017  C   ASP B 139      42.788 -16.786  37.740  1.00 75.94           C
ATOM   5018  O   ASP B 139      41.851 -16.949  38.521  1.00 75.94           O
ATOM   5019  N   MET B 140      43.887 -16.088  38.079  1.00 72.08           N
ATOM   5020  CA  MET B 140      44.038 -15.601  39.417  1.00 72.08           C
ATOM   5021  CB  MET B 140      45.345 -14.830  39.630  1.00 72.08           C
ATOM   5022  CG  MET B 140      45.598 -14.466  41.090  1.00 72.08           C
ATOM   5023  SD  MET B 140      46.858 -13.180  41.312  1.00 72.08           S
ATOM   5024  CE  MET B 140      45.800 -11.866  40.641  1.00 72.08           C
ATOM   5025  C   MET B 140      42.915 -14.655  39.715  1.00 72.08           C
ATOM   5026  O   MET B 140      42.264 -14.765  40.754  1.00 72.08           O
ATOM   5027  N   VAL B 141      42.631 -13.720  38.783  1.00120.73           N
ATOM   5028  CA  VAL B 141      41.604 -12.738  39.000  1.00120.73           C
ATOM   5029  CB  VAL B 141      41.550 -11.644  37.969  1.00120.73           C
ATOM   5030  CG1 VAL B 141      42.709 -10.680  38.238  1.00120.73           C
ATOM   5031  CG2 VAL B 141      41.632 -12.262  36.567  1.00120.73           C
ATOM   5032  C   VAL B 141      40.256 -13.390  39.116  1.00120.73           C
ATOM   5033  O   VAL B 141      39.431 -12.961  39.923  1.00120.73           O
ATOM   5034  N   HIS B 142      39.985 -14.442  38.320  1.00 68.74           N
ATOM   5035  CA  HIS B 142      38.710 -15.105  38.388  1.00 68.74           C
ATOM   5036  ND1 HIS B 142      37.931 -16.385  34.842  1.00 68.74           N
ATOM   5037  CG  HIS B 142      38.212 -15.623  35.954  1.00 68.74           C
ATOM   5038  CB  HIS B 142      38.507 -16.191  37.314  1.00 68.74           C
ATOM   5039  NE2 HIS B 142      37.818 -14.259  34.200  1.00 68.74           N
ATOM   5040  CD2 HIS B 142      38.141 -14.327  35.544  1.00 68.74           C
ATOM   5041  CE1 HIS B 142      37.703 -15.519  33.822  1.00 68.74           C
ATOM   5042  C   HIS B 142      38.518 -15.744  39.731  1.00 68.74           C
ATOM   5043  O   HIS B 142      37.404 -15.779  40.253  1.00 68.74           O
ATOM   5044  N   ALA B 143      39.591 -16.315  40.305  1.00 42.10           N
ATOM   5045  CA  ALA B 143      39.517 -16.960  41.589  1.00 42.10           C
ATOM   5046  CB  ALA B 143      40.831 -17.665  41.971  1.00 42.10           C
ATOM   5047  C   ALA B 143      39.206 -15.957  42.667  1.00 42.10           C
ATOM   5048  O   ALA B 143      38.481 -16.263  43.615  1.00 42.10           O
ATOM   5049  N   LEU B 144      39.824 -14.759  42.580  1.00 70.19           N
ATOM   5050  CA  LEU B 144      39.671 -13.676  43.523  1.00 70.19           C
ATOM   5051  CB  LEU B 144      40.717 -12.567  43.324  1.00 70.19           C
ATOM   5052  CG  LEU B 144      42.173 -13.038  43.490  1.00 70.19           C
[truncated: 848,309 more chars]
