# Supplementary material for: Molecular Mechanism of Response and Adaptation of Antioxidant Enzyme System to Salt Stress in Leaves of Gymnocarpos przewalskii
Source: Plants (Basel). 2023 Sep 25;12(19):3370. doi: 10.3390/plants12193370 (PMC10574792; doi:10.3390/plants12193370)
Supplement: Supplementary file 1 [file plants-12-03370-s001.zip › GpCAT1.pdb]

EXPDTA    THEORETICAL MODEL, MODELLER 10.1 2023/02/17 22:53:07
REMARK   6 MODELLER OBJECTIVE FUNCTION:     13963.1113
REMARK   6 MODELLER BEST TEMPLATE % SEQ ID:  50.313
REMARK   6 SEQUENCE: sequenceGypr
REMARK   6 ALIGNMENT: sequenceGypr.ali
REMARK   6 SCRIPT: PHHBAA.py
REMARK   6 DOPE score: -230528.15625
REMARK   6 GA341 score: 1.00000
REMARK   6 TEMPLATE: 2j2m 6:A - 484:A MODELS 1:A - 478:A AT 50.3%
REMARK   6 TEMPLATE: 2j2m 6:B - 484:B MODELS 1:B - 478:B AT 50.3%
REMARK   6 TEMPLATE: 2j2m 6:C - 484:C MODELS 1:C - 478:C AT 50.3%
REMARK   6 TEMPLATE: 2j2m 6:D - 484:D MODELS 1:D - 478:D AT 50.3%
REMARK   6 TEMPLATE: 2j2m 501:A - 501:A MODELS 400:A - 400:A AT 50.3%
REMARK   6 TEMPLATE: 2j2m 501:B - 501:B MODELS 400:B - 400:B AT 50.3%
REMARK   6 TEMPLATE: 2j2m 501:C - 501:C MODELS 400:C - 400:C AT 50.3%
REMARK   6 TEMPLATE: 2j2m 501:D - 501:D MODELS 400:D - 400:D AT 50.3%
ATOM      1  N   THR A   1      37.311 -32.278  29.998  1.00 23.51           N
ATOM      2  CA  THR A   1      37.127 -31.303  28.897  1.00 23.51           C
ATOM      3  CB  THR A   1      36.111 -30.269  29.283  1.00 23.51           C
ATOM      4  OG1 THR A   1      34.877 -30.888  29.620  1.00 23.51           O
ATOM      5  CG2 THR A   1      35.915 -29.312  28.097  1.00 23.51           C
ATOM      6  C   THR A   1      38.419 -30.602  28.637  1.00 23.51           C
ATOM      7  O   THR A   1      39.240 -30.458  29.541  1.00 23.51           O
ATOM      8  N   TYR A   2      38.638 -30.134  27.393  1.00 66.64           N
ATOM      9  CA  TYR A   2      39.884 -29.476  27.126  1.00 66.64           C
ATOM     10  CB  TYR A   2      40.639 -29.920  25.854  1.00 66.64           C
ATOM     11  CG  TYR A   2      41.310 -31.218  26.148  1.00 66.64           C
ATOM     12  CD1 TYR A   2      42.455 -31.227  26.910  1.00 66.64           C
ATOM     13  CD2 TYR A   2      40.803 -32.416  25.699  1.00 66.64           C
ATOM     14  CE1 TYR A   2      43.098 -32.403  27.209  1.00 66.64           C
ATOM     15  CE2 TYR A   2      41.442 -33.599  25.994  1.00 66.64           C
ATOM     16  CZ  TYR A   2      42.592 -33.595  26.750  1.00 66.64           C
ATOM     17  OH  TYR A   2      43.249 -34.805  27.056  1.00 66.64           O
ATOM     18  C   TYR A   2      39.680 -28.004  27.032  1.00 66.64           C
ATOM     19  O   TYR A   2      38.708 -27.519  26.453  1.00 66.64           O
ATOM     20  N   PHE A   3      40.616 -27.264  27.660  1.00 67.81           N
ATOM     21  CA  PHE A   3      40.632 -25.834  27.645  1.00 67.81           C
ATOM     22  CB  PHE A   3      41.684 -25.218  28.587  1.00 67.81           C
ATOM     23  CG  PHE A   3      41.525 -23.735  28.561  1.00 67.81           C
ATOM     24  CD1 PHE A   3      40.591 -23.112  29.356  1.00 67.81           C
ATOM     25  CD2 PHE A   3      42.315 -22.957  27.748  1.00 67.81           C
ATOM     26  CE1 PHE A   3      40.446 -21.744  29.335  1.00 67.81           C
ATOM     27  CE2 PHE A   3      42.177 -21.590  27.718  1.00 67.81           C
ATOM     28  CZ  PHE A   3      41.239 -20.979  28.514  1.00 67.81           C
ATOM     29  C   PHE A   3      40.954 -25.432  26.250  1.00 67.81           C
ATOM     30  O   PHE A   3      41.790 -26.045  25.584  1.00 67.81           O
ATOM     31  N   THR A   4      40.284 -24.367  25.780  1.00144.34           N
ATOM     32  CA  THR A   4      40.383 -24.026  24.402  1.00144.34           C
ATOM     33  CB  THR A   4      39.104 -24.397  23.756  1.00144.34           C
ATOM     34  OG1 THR A   4      38.787 -25.750  24.013  1.00144.34           O
ATOM     35  CG2 THR A   4      39.283 -24.212  22.277  1.00144.34           C
ATOM     36  C   THR A   4      40.457 -22.534  24.303  1.00144.34           C
ATOM     37  O   THR A   4      40.203 -21.826  25.274  1.00144.34           O
ATOM     38  N   THR A   5      40.845 -22.026  23.115  1.00 59.67           N
ATOM     39  CA  THR A   5      40.780 -20.625  22.832  1.00 59.67           C
ATOM     40  CB  THR A   5      41.728 -20.198  21.759  1.00 59.67           C
ATOM     41  OG1 THR A   5      41.376 -20.829  20.540  1.00 59.67           O
ATOM     42  CG2 THR A   5      43.150 -20.613  22.171  1.00 59.67           C
ATOM     43  C   THR A   5      39.390 -20.402  22.309  1.00 59.67           C
ATOM     44  O   THR A   5      38.624 -21.349  22.145  1.00 59.67           O
ATOM     45  N   ASN A   6      39.028 -19.137  22.021  1.00 83.09           N
ATOM     46  CA  ASN A   6      37.719 -18.819  21.523  1.00 83.09           C
ATOM     47  CB  ASN A   6      37.465 -17.312  21.391  1.00 83.09           C
ATOM     48  CG  ASN A   6      37.300 -16.730  22.787  1.00 83.09           C
ATOM     49  OD1 ASN A   6      37.407 -15.522  22.985  1.00 83.09           O
ATOM     50  ND2 ASN A   6      37.035 -17.611  23.787  1.00 83.09           N
ATOM     51  C   ASN A   6      37.569 -19.444  20.164  1.00 83.09           C
ATOM     52  O   ASN A   6      36.454 -19.568  19.656  1.00 83.09           O
ATOM     53  N   SER A   7      38.713 -19.741  19.508  1.00109.97           N
ATOM     54  CA  SER A   7      38.767 -20.355  18.202  1.00109.97           C
ATOM     55  CB  SER A   7      40.102 -20.152  17.464  1.00109.97           C
ATOM     56  OG  SER A   7      41.086 -21.053  17.950  1.00109.97           O
ATOM     57  C   SER A   7      38.542 -21.837  18.274  1.00109.97           C
ATOM     58  O   SER A   7      38.434 -22.500  17.243  1.00109.97           O
ATOM     59  N   GLY A   8      38.526 -22.422  19.482  1.00 43.28           N
ATOM     60  CA  GLY A   8      38.294 -23.837  19.558  1.00 43.28           C
ATOM     61  C   GLY A   8      39.578 -24.607  19.404  1.00 43.28           C
ATOM     62  O   GLY A   8      39.547 -25.832  19.286  1.00 43.28           O
ATOM     63  N   ALA A   9      40.743 -23.924  19.401  1.00 56.85           N
ATOM     64  CA  ALA A   9      41.987 -24.649  19.359  1.00 56.85           C
ATOM     65  CB  ALA A   9      43.152 -23.831  18.777  1.00 56.85           C
ATOM     66  C   ALA A   9      42.345 -25.028  20.770  1.00 56.85           C
ATOM     67  O   ALA A   9      42.225 -24.213  21.683  1.00 56.85           O
ATOM     68  N   PRO A  10      42.804 -26.238  20.984  1.00 88.67           N
ATOM     69  CA  PRO A  10      43.120 -26.674  22.326  1.00 88.67           C
ATOM     70  CD  PRO A  10      42.371 -27.343  20.143  1.00 88.67           C
ATOM     71  CB  PRO A  10      43.212 -28.200  22.258  1.00 88.67           C
ATOM     72  CG  PRO A  10      42.304 -28.567  21.070  1.00 88.67           C
ATOM     73  C   PRO A  10      44.364 -26.032  22.867  1.00 88.67           C
ATOM     74  O   PRO A  10      45.318 -25.868  22.107  1.00 88.67           O
ATOM     75  N   VAL A  11      44.403 -25.688  24.175  1.00139.79           N
ATOM     76  CA  VAL A  11      45.608 -25.085  24.682  1.00139.79           C
ATOM     77  CB  VAL A  11      45.414 -23.816  25.460  1.00139.79           C
ATOM     78  CG1 VAL A  11      44.850 -24.155  26.849  1.00139.79           C
ATOM     79  CG2 VAL A  11      46.767 -23.085  25.511  1.00139.79           C
ATOM     80  C   VAL A  11      46.362 -26.048  25.585  1.00139.79           C
ATOM     81  O   VAL A  11      45.783 -26.702  26.443  1.00139.79           O
ATOM     82  N   TYR A  12      47.670 -26.258  25.320  1.00309.50           N
ATOM     83  CA  TYR A  12      48.634 -26.993  26.142  1.00309.50           C
ATOM     84  CB  TYR A  12      50.021 -27.593  25.687  1.00309.50           C
ATOM     85  CG  TYR A  12      51.206 -27.421  26.676  1.00309.50           C
ATOM     86  CD1 TYR A  12      51.403 -28.069  27.887  1.00309.50           C
ATOM     87  CD2 TYR A  12      52.225 -26.536  26.390  1.00309.50           C
ATOM     88  CE1 TYR A  12      52.482 -27.877  28.719  1.00309.50           C
ATOM     89  CE2 TYR A  12      53.326 -26.315  27.187  1.00309.50           C
ATOM     90  CZ  TYR A  12      53.460 -26.987  28.371  1.00309.50           C
ATOM     91  OH  TYR A  12      54.579 -26.771  29.205  1.00309.50           O
ATOM     92  C   TYR A  12      49.107 -26.222  27.271  1.00309.50           C
ATOM     93  O   TYR A  12      49.113 -26.744  28.375  1.00309.50           O
ATOM     94  N   ASN A  13      49.538 -24.975  27.033  1.00100.34           N
ATOM     95  CA  ASN A  13      50.187 -24.367  28.148  1.00100.34           C
ATOM     96  CB  ASN A  13      51.651 -23.997  27.867  1.00100.34           C
ATOM     97  CG  ASN A  13      52.410 -24.033  29.187  1.00100.34           C
ATOM     98  OD1 ASN A  13      53.623 -23.837  29.222  1.00100.34           O
ATOM     99  ND2 ASN A  13      51.681 -24.330  30.295  1.00100.34           N
ATOM    100  C   ASN A  13      49.476 -23.103  28.483  1.00100.34           C
ATOM    101  O   ASN A  13      49.606 -22.096  27.792  1.00100.34           O
ATOM    102  N   ASN A  14      48.663 -23.168  29.546  1.00120.38           N
ATOM    103  CA  ASN A  14      47.894 -22.092  30.085  1.00120.38           C
ATOM    104  CB  ASN A  14      46.644 -22.570  30.836  1.00120.38           C
ATOM    105  CG  ASN A  14      45.694 -21.386  30.904  1.00120.38           C
ATOM    106  OD1 ASN A  14      45.724 -20.505  30.046  1.00120.38           O
ATOM    107  ND2 ASN A  14      44.828 -21.359  31.951  1.00120.38           N
ATOM    108  C   ASN A  14      48.704 -21.231  31.025  1.00120.38           C
ATOM    109  O   ASN A  14      48.159 -20.282  31.582  1.00120.38           O
ATOM    110  N   ASN A  15      49.911 -21.695  31.420  1.00109.89           N
ATOM    111  CA  ASN A  15      50.820 -21.066  32.347  1.00109.89           C
ATOM    112  CB  ASN A  15      51.634 -22.130  33.095  1.00109.89           C
ATOM    113  CG  ASN A  15      50.625 -22.987  33.848  1.00109.89           C
ATOM    114  OD1 ASN A  15      50.325 -22.738  35.015  1.00109.89           O
ATOM    115  ND2 ASN A  15      50.062 -24.013  33.154  1.00109.89           N
ATOM    116  C   ASN A  15      51.800 -20.052  31.794  1.00109.89           C
ATOM    117  O   ASN A  15      52.133 -19.091  32.488  1.00109.89           O
ATOM    118  N   SER A  16      52.344 -20.229  30.567  1.00100.57           N
ATOM    119  CA  SER A  16      53.426 -19.345  30.200  1.00100.57           C
ATOM    120  CB  SER A  16      54.797 -20.043  30.129  1.00100.57           C
ATOM    121  OG  SER A  16      54.835 -20.952  29.039  1.00100.57           O
ATOM    122  C   SER A  16      53.207 -18.689  28.874  1.00100.57           C
ATOM    123  O   SER A  16      52.661 -19.275  27.942  1.00100.57           O
ATOM    124  N   SER A  17      53.655 -17.421  28.768  1.00 49.58           N
ATOM    125  CA  SER A  17      53.547 -16.708  27.531  1.00 49.58           C
ATOM    126  CB  SER A  17      53.684 -15.185  27.697  1.00 49.58           C
ATOM    127  OG  SER A  17      52.666 -14.696  28.558  1.00 49.58           O
ATOM    128  C   SER A  17      54.646 -17.179  26.619  1.00 49.58           C
ATOM    129  O   SER A  17      55.608 -17.809  27.060  1.00 49.58           O
ATOM    130  N   LEU A  18      54.502 -16.898  25.303  1.00137.30           N
ATOM    131  CA  LEU A  18      55.502 -17.222  24.321  1.00137.30           C
ATOM    132  CB  LEU A  18      55.001 -17.136  22.863  1.00137.30           C
ATOM    133  CG  LEU A  18      53.889 -18.106  22.430  1.00137.30           C
ATOM    134  CD1 LEU A  18      53.505 -17.859  20.960  1.00137.30           C
ATOM    135  CD2 LEU A  18      54.284 -19.569  22.682  1.00137.30           C
ATOM    136  C   LEU A  18      56.491 -16.099  24.385  1.00137.30           C
ATOM    137  O   LEU A  18      56.133 -14.953  24.128  1.00137.30           O
ATOM    138  N   THR A  19      57.771 -16.382  24.689  1.00 72.87           N
ATOM    139  CA  THR A  19      58.699 -15.295  24.841  1.00 72.87           C
ATOM    140  CB  THR A  19      59.146 -15.115  26.272  1.00 72.87           C
ATOM    141  OG1 THR A  19      59.677 -16.333  26.771  1.00 72.87           O
ATOM    142  CG2 THR A  19      57.955 -14.672  27.140  1.00 72.87           C
ATOM    143  C   THR A  19      59.901 -15.519  23.977  1.00 72.87           C
ATOM    144  O   THR A  19      60.167 -16.637  23.536  1.00 72.87           O
ATOM    145  N   VAL A  20      60.649 -14.429  23.689  1.00143.29           N
ATOM    146  CA  VAL A  20      61.840 -14.555  22.886  1.00143.29           C
ATOM    147  CB  VAL A  20      62.288 -13.259  22.251  1.00143.29           C
ATOM    148  CG1 VAL A  20      61.335 -12.900  21.105  1.00143.29           C
ATOM    149  CG2 VAL A  20      62.320 -12.163  23.337  1.00143.29           C
ATOM    150  C   VAL A  20      62.959 -15.011  23.779  1.00143.29           C
ATOM    151  O   VAL A  20      63.907 -14.271  24.050  1.00143.29           O
ATOM    152  N   GLY A  21      62.917 -16.301  24.174  1.00 55.79           N
ATOM    153  CA  GLY A  21      63.893 -16.862  25.068  1.00 55.79           C
ATOM    154  C   GLY A  21      63.244 -17.012  26.411  1.00 55.79           C
ATOM    155  O   GLY A  21      62.245 -16.360  26.707  1.00 55.79           O
ATOM    156  N   THR A  22      63.814 -17.864  27.285  1.00132.45           N
ATOM    157  CA  THR A  22      63.189 -18.119  28.549  1.00132.45           C
ATOM    158  CB  THR A  22      63.934 -19.126  29.385  1.00132.45           C
ATOM    159  OG1 THR A  22      63.187 -19.438  30.554  1.00132.45           O
ATOM    160  CG2 THR A  22      65.314 -18.565  29.763  1.00132.45           C
ATOM    161  C   THR A  22      63.088 -16.829  29.311  1.00132.45           C
ATOM    162  O   THR A  22      62.111 -16.584  30.016  1.00132.45           O
ATOM    163  N   ARG A  23      64.167 -16.033  29.263  1.00175.14           N
ATOM    164  CA  ARG A  23      64.354 -14.729  29.836  1.00175.14           C
ATOM    165  CB  ARG A  23      65.812 -14.451  30.227  1.00175.14           C
ATOM    166  CG  ARG A  23      66.289 -15.335  31.377  1.00175.14           C
ATOM    167  CD  ARG A  23      67.718 -15.042  31.834  1.00175.14           C
ATOM    168  NE  ARG A  23      67.640 -14.258  33.098  1.00175.14           N
ATOM    169  CZ  ARG A  23      67.697 -12.894  33.094  1.00175.14           C
ATOM    170  NH1 ARG A  23      67.883 -12.207  31.928  1.00175.14           N
ATOM    171  NH2 ARG A  23      67.579 -12.216  34.273  1.00175.14           N
ATOM    172  C   ARG A  23      63.905 -13.569  28.978  1.00175.14           C
ATOM    173  O   ARG A  23      63.993 -12.432  29.434  1.00175.14           O
ATOM    174  N   GLY A  24      63.563 -13.768  27.689  1.00 62.90           N
ATOM    175  CA  GLY A  24      63.347 -12.636  26.811  1.00 62.90           C
ATOM    176  C   GLY A  24      61.936 -12.108  26.788  1.00 62.90           C
ATOM    177  O   GLY A  24      61.029 -12.636  27.428  1.00 62.90           O
ATOM    178  N   PRO A  25      61.742 -11.063  26.001  1.00106.99           N
ATOM    179  CA  PRO A  25      60.463 -10.398  25.906  1.00106.99           C
ATOM    180  CD  PRO A  25      62.837 -10.187  25.625  1.00106.99           C
ATOM    181  CB  PRO A  25      60.742  -9.016  25.308  1.00106.99           C
ATOM    182  CG  PRO A  25      62.173  -9.114  24.750  1.00106.99           C
ATOM    183  C   PRO A  25      59.409 -11.191  25.185  1.00106.99           C
ATOM    184  O   PRO A  25      59.748 -12.071  24.395  1.00106.99           O
ATOM    185  N   ILE A  26      58.120 -10.872  25.448  1.00 78.97           N
ATOM    186  CA  ILE A  26      56.979 -11.590  24.946  1.00 78.97           C
ATOM    187  CB  ILE A  26      55.715 -11.345  25.729  1.00 78.97           C
ATOM    188  CG1 ILE A  26      55.898 -11.866  27.166  1.00 78.97           C
ATOM    189  CG2 ILE A  26      54.535 -12.010  25.000  1.00 78.97           C
ATOM    190  CD1 ILE A  26      54.728 -11.541  28.092  1.00 78.97           C
ATOM    191  C   ILE A  26      56.740 -11.292  23.493  1.00 78.97           C
ATOM    192  O   ILE A  26      57.027 -10.201  23.001  1.00 78.97           O
ATOM    193  N   LEU A  27      56.229 -12.307  22.763  1.00 74.22           N
ATOM    194  CA  LEU A  27      56.006 -12.203  21.350  1.00 74.22           C
ATOM    195  CB  LEU A  27      56.182 -13.531  20.599  1.00 74.22           C
ATOM    196  CG  LEU A  27      57.634 -14.028  20.580  1.00 74.22           C
ATOM    197  CD1 LEU A  27      57.774 -15.322  19.762  1.00 74.22           C
ATOM    198  CD2 LEU A  27      58.573 -12.911  20.106  1.00 74.22           C
ATOM    199  C   LEU A  27      54.617 -11.735  21.046  1.00 74.22           C
ATOM    200  O   LEU A  27      53.634 -12.088  21.693  1.00 74.22           O
ATOM    201  N   LEU A  28      54.532 -10.922  19.983  1.00 73.22           N
ATOM    202  CA  LEU A  28      53.330 -10.355  19.455  1.00 73.22           C
ATOM    203  CB  LEU A  28      53.658  -9.447  18.257  1.00 73.22           C
ATOM    204  CG  LEU A  28      52.479  -8.621  17.721  1.00 73.22           C
ATOM    205  CD1 LEU A  28      52.031  -7.580  18.761  1.00 73.22           C
ATOM    206  CD2 LEU A  28      52.809  -7.997  16.353  1.00 73.22           C
ATOM    207  C   LEU A  28      52.471 -11.491  18.963  1.00 73.22           C
ATOM    208  O   LEU A  28      51.244 -11.410  18.980  1.00 73.22           O
ATOM    209  N   GLU A  29      53.114 -12.575  18.489  1.00108.31           N
ATOM    210  CA  GLU A  29      52.459 -13.716  17.901  1.00108.31           C
ATOM    211  CB  GLU A  29      53.344 -14.604  17.010  1.00108.31           C
ATOM    212  CG  GLU A  29      54.434 -15.395  17.720  1.00108.31           C
ATOM    213  CD  GLU A  29      55.086 -16.267  16.655  1.00108.31           C
ATOM    214  OE1 GLU A  29      54.884 -15.970  15.448  1.00108.31           O
ATOM    215  OE2 GLU A  29      55.785 -17.244  17.033  1.00108.31           O
ATOM    216  C   GLU A  29      51.718 -14.573  18.896  1.00108.31           C
ATOM    217  O   GLU A  29      51.032 -15.511  18.496  1.00108.31           O
ATOM    218  N   ASP A  30      51.908 -14.373  20.214  1.00 98.51           N
ATOM    219  CA  ASP A  30      51.204 -15.188  21.178  1.00 98.51           C
ATOM    220  CB  ASP A  30      51.700 -14.927  22.620  1.00 98.51           C
ATOM    221  CG  ASP A  30      51.221 -16.018  23.570  1.00 98.51           C
ATOM    222  OD1 ASP A  30      50.364 -16.843  23.156  1.00 98.51           O
ATOM    223  OD2 ASP A  30      51.726 -16.050  24.724  1.00 98.51           O
ATOM    224  C   ASP A  30      49.724 -14.885  21.111  1.00 98.51           C
ATOM    225  O   ASP A  30      49.192 -14.123  21.919  1.00 98.51           O
ATOM    226  N   TYR A  31      49.000 -15.530  20.165  1.00 69.18           N
ATOM    227  CA  TYR A  31      47.590 -15.293  19.981  1.00 69.18           C
ATOM    228  CB  TYR A  31      46.957 -16.078  18.821  1.00 69.18           C
ATOM    229  CG  TYR A  31      45.483 -15.819  18.854  1.00 69.18           C
ATOM    230  CD1 TYR A  31      44.952 -14.672  18.306  1.00 69.18           C
ATOM    231  CD2 TYR A  31      44.625 -16.731  19.428  1.00 69.18           C
ATOM    232  CE1 TYR A  31      43.595 -14.440  18.332  1.00 69.18           C
ATOM    233  CE2 TYR A  31      43.267 -16.507  19.456  1.00 69.18           C
ATOM    234  CZ  TYR A  31      42.750 -15.358  18.907  1.00 69.18           C
ATOM    235  OH  TYR A  31      41.358 -15.122  18.932  1.00 69.18           O
ATOM    236  C   TYR A  31      46.841 -15.693  21.212  1.00 69.18           C
ATOM    237  O   TYR A  31      45.915 -15.002  21.635  1.00 69.18           O
ATOM    238  N   HIS A  32      47.222 -16.824  21.833  1.00 93.77           N
ATOM    239  CA  HIS A  32      46.471 -17.305  22.961  1.00 93.77           C
ATOM    240  ND1 HIS A  32      45.200 -20.014  24.667  1.00 93.77           N
ATOM    241  CG  HIS A  32      46.165 -19.035  24.737  1.00 93.77           C
ATOM    242  CB  HIS A  32      47.010 -18.603  23.577  1.00 93.77           C
ATOM    243  NE2 HIS A  32      45.174 -19.246  26.753  1.00 93.77           N
ATOM    244  CD2 HIS A  32      46.135 -18.576  26.019  1.00 93.77           C
ATOM    245  CE1 HIS A  32      44.640 -20.101  25.899  1.00 93.77           C
ATOM    246  C   HIS A  32      46.466 -16.295  24.069  1.00 93.77           C
ATOM    247  O   HIS A  32      45.437 -16.078  24.709  1.00 93.77           O
ATOM    248  N   LEU A  33      47.625 -15.677  24.356  1.00133.71           N
ATOM    249  CA  LEU A  33      47.723 -14.739  25.441  1.00133.71           C
ATOM    250  CB  LEU A  33      49.195 -14.360  25.690  1.00133.71           C
ATOM    251  CG  LEU A  33      49.479 -13.609  27.001  1.00133.71           C
ATOM    252  CD1 LEU A  33      48.968 -12.166  26.985  1.00133.71           C
ATOM    253  CD2 LEU A  33      48.938 -14.404  28.194  1.00133.71           C
ATOM    254  C   LEU A  33      46.910 -13.511  25.130  1.00133.71           C
ATOM    255  O   LEU A  33      46.118 -13.050  25.953  1.00133.71           O
ATOM    256  N   VAL A  34      47.052 -12.977  23.900  1.00 39.26           N
ATOM    257  CA  VAL A  34      46.400 -11.754  23.513  1.00 39.26           C
ATOM    258  CB  VAL A  34      46.800 -11.299  22.140  1.00 39.26           C
ATOM    259  CG1 VAL A  34      45.986 -10.046  21.774  1.00 39.26           C
ATOM    260  CG2 VAL A  34      48.320 -11.077  22.130  1.00 39.26           C
ATOM    261  C   VAL A  34      44.910 -11.929  23.519  1.00 39.26           C
ATOM    262  O   VAL A  34      44.180 -11.040  23.957  1.00 39.26           O
ATOM    263  N   GLU A  35      44.407 -13.077  23.026  1.00 51.15           N
ATOM    264  CA  GLU A  35      42.984 -13.267  22.991  1.00 51.15           C
ATOM    265  CB  GLU A  35      42.566 -14.616  22.389  1.00 51.15           C
ATOM    266  CG  GLU A  35      41.048 -14.811  22.323  1.00 51.15           C
ATOM    267  CD  GLU A  35      40.788 -16.269  21.969  1.00 51.15           C
ATOM    268  OE1 GLU A  35      41.104 -17.144  22.820  1.00 51.15           O
ATOM    269  OE2 GLU A  35      40.275 -16.531  20.848  1.00 51.15           O
ATOM    270  C   GLU A  35      42.473 -13.254  24.399  1.00 51.15           C
ATOM    271  O   GLU A  35      41.409 -12.707  24.684  1.00 51.15           O
ATOM    272  N   LYS A  36      43.222 -13.894  25.314  1.00 64.70           N
ATOM    273  CA  LYS A  36      42.860 -14.010  26.701  1.00 64.70           C
ATOM    274  CB  LYS A  36      43.870 -14.909  27.441  1.00 64.70           C
ATOM    275  CG  LYS A  36      43.496 -15.330  28.863  1.00 64.70           C
ATOM    276  CD  LYS A  36      44.373 -16.484  29.363  1.00 64.70           C
ATOM    277  CE  LYS A  36      44.119 -16.912  30.810  1.00 64.70           C
ATOM    278  NZ  LYS A  36      44.999 -18.052  31.156  1.00 64.70           N
ATOM    279  C   LYS A  36      42.855 -12.660  27.362  1.00 64.70           C
ATOM    280  O   LYS A  36      41.880 -12.286  28.012  1.00 64.70           O
ATOM    281  N   LEU A  37      43.949 -11.885  27.198  1.00131.56           N
ATOM    282  CA  LEU A  37      44.097 -10.595  27.828  1.00131.56           C
ATOM    283  CB  LEU A  37      45.510 -10.002  27.627  1.00131.56           C
ATOM    284  CG  LEU A  37      45.833  -8.744  28.467  1.00131.56           C
ATOM    285  CD1 LEU A  37      44.980  -7.530  28.070  1.00131.56           C
ATOM    286  CD2 LEU A  37      45.771  -9.055  29.971  1.00131.56           C
ATOM    287  C   LEU A  37      43.105  -9.639  27.234  1.00131.56           C
ATOM    288  O   LEU A  37      42.488  -8.853  27.952  1.00131.56           O
ATOM    289  N   ALA A  38      42.927  -9.688  25.900  1.00 39.57           N
ATOM    290  CA  ALA A  38      42.072  -8.759  25.212  1.00 39.57           C
ATOM    291  CB  ALA A  38      42.079  -8.959  23.687  1.00 39.57           C
ATOM    292  C   ALA A  38      40.650  -8.905  25.679  1.00 39.57           C
ATOM    293  O   ALA A  38      39.931  -7.916  25.801  1.00 39.57           O
ATOM    294  N   ASN A  39      40.181 -10.145  25.909  1.00 44.05           N
ATOM    295  CA  ASN A  39      38.831 -10.364  26.365  1.00 44.05           C
ATOM    296  CB  ASN A  39      38.482 -11.864  26.418  1.00 44.05           C
ATOM    297  CG  ASN A  39      37.025 -12.031  26.833  1.00 44.05           C
ATOM    298  OD1 ASN A  39      36.310 -11.056  27.063  1.00 44.05           O
ATOM    299  ND2 ASN A  39      36.574 -13.311  26.941  1.00 44.05           N
ATOM    300  C   ASN A  39      38.677  -9.823  27.757  1.00 44.05           C
ATOM    301  O   ASN A  39      37.682  -9.175  28.085  1.00 44.05           O
ATOM    302  N   PHE A  40      39.692 -10.064  28.605  1.00 74.46           N
ATOM    303  CA  PHE A  40      39.703  -9.659  29.983  1.00 74.46           C
ATOM    304  CB  PHE A  40      41.031 -10.058  30.658  1.00 74.46           C
ATOM    305  CG  PHE A  40      41.100  -9.548  32.059  1.00 74.46           C
ATOM    306  CD1 PHE A  40      40.364 -10.128  33.067  1.00 74.46           C
ATOM    307  CD2 PHE A  40      41.943  -8.506  32.371  1.00 74.46           C
ATOM    308  CE1 PHE A  40      40.446  -9.653  34.356  1.00 74.46           C
ATOM    309  CE2 PHE A  40      42.031  -8.027  33.656  1.00 74.46           C
ATOM    310  CZ  PHE A  40      41.283  -8.603  34.653  1.00 74.46           C
ATOM    311  C   PHE A  40      39.555  -8.171  30.033  1.00 74.46           C
ATOM    312  O   PHE A  40      38.785  -7.643  30.834  1.00 74.46           O
ATOM    313  N   ASP A  41      40.266  -7.462  29.138  1.00 99.91           N
ATOM    314  CA  ASP A  41      40.257  -6.025  29.108  1.00 99.91           C
ATOM    315  CB  ASP A  41      41.166  -5.420  28.024  1.00 99.91           C
ATOM    316  CG  ASP A  41      42.627  -5.582  28.416  1.00 99.91           C
ATOM    317  OD1 ASP A  41      42.903  -5.999  29.573  1.00 99.91           O
ATOM    318  OD2 ASP A  41      43.492  -5.286  27.549  1.00 99.91           O
ATOM    319  C   ASP A  41      38.877  -5.500  28.828  1.00 99.91           C
ATOM    320  O   ASP A  41      38.564  -4.365  29.181  1.00 99.91           O
ATOM    321  N   ARG A  42      38.088  -6.265  28.057  1.00174.61           N
ATOM    322  CA  ARG A  42      36.756  -5.990  27.576  1.00174.61           C
ATOM    323  CB  ARG A  42      36.440  -6.688  26.241  1.00174.61           C
ATOM    324  CG  ARG A  42      37.337  -6.270  25.072  1.00174.61           C
ATOM    325  CD  ARG A  42      37.417  -4.762  24.850  1.00174.61           C
ATOM    326  NE  ARG A  42      38.177  -4.514  23.591  1.00174.61           N
ATOM    327  CZ  ARG A  42      39.535  -4.648  23.553  1.00174.61           C
ATOM    328  NH1 ARG A  42      40.209  -5.164  24.622  1.00174.61           N
ATOM    329  NH2 ARG A  42      40.221  -4.273  22.434  1.00174.61           N
ATOM    330  C   ARG A  42      35.609  -6.346  28.489  1.00174.61           C
ATOM    331  O   ARG A  42      34.455  -6.118  28.124  1.00174.61           O
ATOM    332  N   GLU A  43      35.857  -7.023  29.620  1.00 80.69           N
ATOM    333  CA  GLU A  43      34.794  -7.613  30.392  1.00 80.69           C
ATOM    334  CB  GLU A  43      35.329  -8.438  31.575  1.00 80.69           C
ATOM    335  CG  GLU A  43      36.121  -9.651  31.070  1.00 80.69           C
ATOM    336  CD  GLU A  43      36.513 -10.560  32.225  1.00 80.69           C
ATOM    337  OE1 GLU A  43      36.247 -10.198  33.402  1.00 80.69           O
ATOM    338  OE2 GLU A  43      37.087 -11.644  31.931  1.00 80.69           O
ATOM    339  C   GLU A  43      33.752  -6.641  30.882  1.00 80.69           C
ATOM    340  O   GLU A  43      32.571  -6.987  30.887  1.00 80.69           O
ATOM    341  N   ARG A  44      34.130  -5.416  31.296  1.00100.43           N
ATOM    342  CA  ARG A  44      33.179  -4.521  31.914  1.00100.43           C
ATOM    343  CB  ARG A  44      33.835  -3.515  32.876  1.00100.43           C
ATOM    344  CG  ARG A  44      34.670  -4.178  33.977  1.00100.43           C
ATOM    345  CD  ARG A  44      33.902  -5.154  34.874  1.00100.43           C
ATOM    346  NE  ARG A  44      34.891  -5.737  35.829  1.00100.43           N
ATOM    347  CZ  ARG A  44      35.586  -6.870  35.511  1.00100.43           C
ATOM    348  NH1 ARG A  44      35.318  -7.543  34.353  1.00100.43           N
ATOM    349  NH2 ARG A  44      36.561  -7.327  36.351  1.00100.43           N
ATOM    350  C   ARG A  44      32.342  -3.740  30.935  1.00100.43           C
ATOM    351  O   ARG A  44      32.753  -3.436  29.816  1.00100.43           O
ATOM    352  N   ILE A  45      31.107  -3.399  31.383  1.00105.06           N
ATOM    353  CA  ILE A  45      30.159  -2.588  30.666  1.00105.06           C
ATOM    354  CB  ILE A  45      28.928  -3.317  30.196  1.00105.06           C
ATOM    355  CG1 ILE A  45      28.098  -3.828  31.382  1.00105.06           C
ATOM    356  CG2 ILE A  45      29.375  -4.428  29.232  1.00105.06           C
ATOM    357  CD1 ILE A  45      28.823  -4.864  32.235  1.00105.06           C
ATOM    358  C   ILE A  45      29.715  -1.541  31.646  1.00105.06           C
ATOM    359  O   ILE A  45      30.040  -1.641  32.829  1.00105.06           O
ATOM    360  N   PRO A  46      29.009  -0.526  31.215  1.00 76.22           N
ATOM    361  CA  PRO A  46      28.597   0.528  32.107  1.00 76.22           C
ATOM    362  CD  PRO A  46      29.060  -0.091  29.830  1.00 76.22           C
ATOM    363  CB  PRO A  46      28.007   1.613  31.210  1.00 76.22           C
ATOM    364  CG  PRO A  46      28.721   1.408  29.862  1.00 76.22           C
ATOM    365  C   PRO A  46      27.626   0.032  33.132  1.00 76.22           C
ATOM    366  O   PRO A  46      26.821  -0.844  32.822  1.00 76.22           O
ATOM    367  N   GLU A  47      27.693   0.571  34.366  1.00 59.28           N
ATOM    368  CA  GLU A  47      26.754   0.215  35.390  1.00 59.28           C
ATOM    369  CB  GLU A  47      27.265   0.460  36.822  1.00 59.28           C
ATOM    370  CG  GLU A  47      27.647   1.907  37.145  1.00 59.28           C
ATOM    371  CD  GLU A  47      28.102   1.910  38.598  1.00 59.28           C
ATOM    372  OE1 GLU A  47      29.144   1.262  38.891  1.00 59.28           O
ATOM    373  OE2 GLU A  47      27.403   2.540  39.435  1.00 59.28           O
ATOM    374  C   GLU A  47      25.520   1.039  35.153  1.00 59.28           C
ATOM    375  O   GLU A  47      25.539   1.973  34.355  1.00 59.28           O
ATOM    376  N   ARG A  48      24.396   0.691  35.810  1.00109.43           N
ATOM    377  CA  ARG A  48      23.171   1.433  35.636  1.00109.43           C
ATOM    378  CB  ARG A  48      21.986   0.862  36.429  1.00109.43           C
ATOM    379  CG  ARG A  48      21.522  -0.495  35.903  1.00109.43           C
ATOM    380  CD  ARG A  48      20.560  -1.211  36.842  1.00109.43           C
ATOM    381  NE  ARG A  48      20.239  -2.524  36.224  1.00109.43           N
ATOM    382  CZ  ARG A  48      21.156  -3.535  36.290  1.00109.43           C
ATOM    383  NH1 ARG A  48      22.382  -3.309  36.845  1.00109.43           N
ATOM    384  NH2 ARG A  48      20.856  -4.763  35.776  1.00109.43           N
ATOM    385  C   ARG A  48      23.409   2.833  36.105  1.00109.43           C
ATOM    386  O   ARG A  48      24.137   3.065  37.070  1.00109.43           O
ATOM    387  N   VAL A  49      22.777   3.811  35.419  1.00111.47           N
ATOM    388  CA  VAL A  49      22.972   5.196  35.747  1.00111.47           C
ATOM    389  CB  VAL A  49      22.165   6.130  34.895  1.00111.47           C
ATOM    390  CG1 VAL A  49      20.673   5.791  35.050  1.00111.47           C
ATOM    391  CG2 VAL A  49      22.521   7.572  35.297  1.00111.47           C
ATOM    392  C   VAL A  49      22.576   5.376  37.173  1.00111.47           C
ATOM    393  O   VAL A  49      23.225   6.104  37.924  1.00111.47           O
ATOM    394  N   VAL A  50      21.475   4.722  37.574  1.00137.04           N
ATOM    395  CA  VAL A  50      21.079   4.719  38.948  1.00137.04           C
ATOM    396  CB  VAL A  50      19.988   5.709  39.223  1.00137.04           C
ATOM    397  CG1 VAL A  50      18.803   5.446  38.291  1.00137.04           C
ATOM    398  CG2 VAL A  50      19.649   5.648  40.709  1.00137.04           C
ATOM    399  C   VAL A  50      20.665   3.303  39.243  1.00137.04           C
ATOM    400  O   VAL A  50      20.404   2.531  38.323  1.00137.04           O
ATOM    401  N   HIS A  51      20.617   2.915  40.535  1.00 82.23           N
ATOM    402  CA  HIS A  51      20.266   1.571  40.929  1.00 82.23           C
ATOM    403  ND1 HIS A  51      16.807   1.081  41.798  1.00 82.23           N
ATOM    404  CG  HIS A  51      17.713   1.781  41.033  1.00 82.23           C
ATOM    405  CB  HIS A  51      18.895   1.145  40.363  1.00 82.23           C
ATOM    406  NE2 HIS A  51      16.145   3.201  41.823  1.00 82.23           N
ATOM    407  CD2 HIS A  51      17.292   3.075  41.057  1.00 82.23           C
ATOM    408  CE1 HIS A  51      15.893   1.976  42.246  1.00 82.23           C
ATOM    409  C   HIS A  51      21.275   0.575  40.431  1.00 82.23           C
ATOM    410  O   HIS A  51      20.916  -0.555  40.102  1.00 82.23           O
ATOM    411  N   ALA A  52      22.567   0.962  40.393  1.00 43.10           N
ATOM    412  CA  ALA A  52      23.636   0.099  39.959  1.00 43.10           C
ATOM    413  CB  ALA A  52      24.996   0.816  39.886  1.00 43.10           C
ATOM    414  C   ALA A  52      23.810  -1.068  40.896  1.00 43.10           C
ATOM    415  O   ALA A  52      24.094  -2.184  40.466  1.00 43.10           O
ATOM    416  N   ARG A  53      23.676  -0.833  42.214  1.00140.73           N
ATOM    417  CA  ARG A  53      23.859  -1.851  43.219  1.00140.73           C
ATOM    418  CB  ARG A  53      24.099  -1.191  44.583  1.00140.73           C
ATOM    419  CG  ARG A  53      24.090  -2.132  45.779  1.00140.73           C
ATOM    420  CD  ARG A  53      25.208  -3.160  45.733  1.00140.73           C
ATOM    421  NE  ARG A  53      25.355  -3.678  47.113  1.00140.73           N
ATOM    422  CZ  ARG A  53      26.097  -4.796  47.328  1.00140.73           C
ATOM    423  NH1 ARG A  53      26.567  -5.519  46.271  1.00140.73           N
ATOM    424  NH2 ARG A  53      26.380  -5.179  48.603  1.00140.73           N
ATOM    425  C   ARG A  53      22.597  -2.671  43.321  1.00140.73           C
ATOM    426  O   ARG A  53      21.535  -2.126  43.618  1.00140.73           O
ATOM    427  N   GLY A  54      22.668  -4.013  43.115  1.00 40.81           N
ATOM    428  CA  GLY A  54      21.431  -4.762  43.167  1.00 40.81           C
ATOM    429  C   GLY A  54      21.618  -6.261  43.198  1.00 40.81           C
ATOM    430  O   GLY A  54      22.725  -6.786  43.076  1.00 40.81           O
ATOM    431  N   ALA A  55      20.484  -6.990  43.376  1.00 48.37           N
ATOM    432  CA  ALA A  55      20.478  -8.432  43.439  1.00 48.37           C
ATOM    433  CB  ALA A  55      20.395  -8.988  44.872  1.00 48.37           C
ATOM    434  C   ALA A  55      19.274  -8.955  42.705  1.00 48.37           C
ATOM    435  O   ALA A  55      18.175  -8.421  42.832  1.00 48.37           O
ATOM    436  N   SER A  56      19.444 -10.065  41.951  1.00 83.79           N
ATOM    437  CA  SER A  56      18.386 -10.595  41.128  1.00 83.79           C
ATOM    438  CB  SER A  56      18.693 -10.460  39.628  1.00 83.79           C
ATOM    439  OG  SER A  56      17.635 -11.003  38.854  1.00 83.79           O
ATOM    440  C   SER A  56      18.184 -12.066  41.375  1.00 83.79           C
ATOM    441  O   SER A  56      19.131 -12.801  41.661  1.00 83.79           O
ATOM    442  N   ALA A  57      16.913 -12.528  41.253  1.00 41.54           N
ATOM    443  CA  ALA A  57      16.587 -13.923  41.429  1.00 41.54           C
ATOM    444  CB  ALA A  57      16.197 -14.288  42.873  1.00 41.54           C
ATOM    445  C   ALA A  57      15.404 -14.288  40.575  1.00 41.54           C
ATOM    446  O   ALA A  57      14.595 -13.438  40.205  1.00 41.54           O
ATOM    447  N   LYS A  58      15.296 -15.598  40.248  1.00100.81           N
ATOM    448  CA  LYS A  58      14.247 -16.161  39.435  1.00100.81           C
ATOM    449  CB  LYS A  58      14.711 -17.386  38.624  1.00100.81           C
ATOM    450  CG  LYS A  58      15.955 -17.173  37.752  1.00100.81           C
ATOM    451  CD  LYS A  58      15.797 -16.171  36.606  1.00100.81           C
ATOM    452  CE  LYS A  58      17.026 -16.128  35.689  1.00100.81           C
ATOM    453  NZ  LYS A  58      16.736 -15.325  34.480  1.00100.81           N
ATOM    454  C   LYS A  58      13.159 -16.668  40.340  1.00100.81           C
ATOM    455  O   LYS A  58      13.408 -16.993  41.501  1.00100.81           O
ATOM    456  N   GLY A  59      11.914 -16.757  39.817  1.00 30.20           N
ATOM    457  CA  GLY A  59      10.816 -17.272  40.592  1.00 30.20           C
ATOM    458  C   GLY A  59       9.608 -17.371  39.711  1.00 30.20           C
ATOM    459  O   GLY A  59       9.704 -17.344  38.484  1.00 30.20           O
ATOM    460  N   PHE A  60       8.421 -17.540  40.330  1.00106.68           N
ATOM    461  CA  PHE A  60       7.225 -17.589  39.545  1.00106.68           C
ATOM    462  CB  PHE A  60       6.735 -19.010  39.190  1.00106.68           C
ATOM    463  CG  PHE A  60       6.532 -19.818  40.422  1.00106.68           C
ATOM    464  CD1 PHE A  60       5.320 -19.822  41.072  1.00106.68           C
ATOM    465  CD2 PHE A  60       7.561 -20.585  40.918  1.00106.68           C
ATOM    466  CE1 PHE A  60       5.142 -20.578  42.208  1.00106.68           C
ATOM    467  CE2 PHE A  60       7.388 -21.341  42.052  1.00106.68           C
ATOM    468  CZ  PHE A  60       6.175 -21.337  42.699  1.00106.68           C
ATOM    469  C   PHE A  60       6.154 -16.797  40.225  1.00106.68           C
ATOM    470  O   PHE A  60       6.185 -16.581  41.436  1.00106.68           O
ATOM    471  N   PHE A  61       5.198 -16.296  39.418  1.00 78.12           N
ATOM    472  CA  PHE A  61       4.097 -15.509  39.891  1.00 78.12           C
ATOM    473  CB  PHE A  61       3.911 -14.243  39.034  1.00 78.12           C
ATOM    474  CG  PHE A  61       2.616 -13.562  39.325  1.00 78.12           C
ATOM    475  CD1 PHE A  61       2.476 -12.714  40.394  1.00 78.12           C
ATOM    476  CD2 PHE A  61       1.532 -13.755  38.499  1.00 78.12           C
ATOM    477  CE1 PHE A  61       1.286 -12.076  40.656  1.00 78.12           C
ATOM    478  CE2 PHE A  61       0.336 -13.124  38.748  1.00 78.12           C
ATOM    479  CZ  PHE A  61       0.209 -12.284  39.829  1.00 78.12           C
ATOM    480  C   PHE A  61       2.865 -16.346  39.741  1.00 78.12           C
ATOM    481  O   PHE A  61       2.661 -16.961  38.696  1.00 78.12           O
ATOM    482  N   GLU A  62       2.020 -16.404  40.794  1.00 55.64           N
ATOM    483  CA  GLU A  62       0.805 -17.170  40.712  1.00 55.64           C
ATOM    484  CB  GLU A  62       0.665 -18.253  41.792  1.00 55.64           C
ATOM    485  CG  GLU A  62      -0.699 -18.942  41.767  1.00 55.64           C
ATOM    486  CD  GLU A  62      -0.861 -19.684  43.086  1.00 55.64           C
ATOM    487  OE1 GLU A  62      -0.993 -18.993  44.132  1.00 55.64           O
ATOM    488  OE2 GLU A  62      -0.853 -20.943  43.069  1.00 55.64           O
ATOM    489  C   GLU A  62      -0.346 -16.241  40.930  1.00 55.64           C
ATOM    490  O   GLU A  62      -0.363 -15.476  41.893  1.00 55.64           O
ATOM    491  N   VAL A  63      -1.358 -16.286  40.040  1.00141.74           N
ATOM    492  CA  VAL A  63      -2.473 -15.404  40.235  1.00141.74           C
ATOM    493  CB  VAL A  63      -2.989 -14.792  38.959  1.00141.74           C
ATOM    494  CG1 VAL A  63      -3.210 -15.895  37.917  1.00141.74           C
ATOM    495  CG2 VAL A  63      -4.243 -13.965  39.282  1.00141.74           C
ATOM    496  C   VAL A  63      -3.564 -16.111  40.987  1.00141.74           C
ATOM    497  O   VAL A  63      -3.977 -17.217  40.639  1.00141.74           O
ATOM    498  N   THR A  64      -3.943 -15.521  42.141  1.00127.76           N
ATOM    499  CA  THR A  64      -5.002 -15.982  42.997  1.00127.76           C
ATOM    500  CB  THR A  64      -4.865 -15.444  44.388  1.00127.76           C
ATOM    501  OG1 THR A  64      -4.971 -14.027  44.379  1.00127.76           O
ATOM    502  CG2 THR A  64      -3.494 -15.865  44.943  1.00127.76           C
ATOM    503  C   THR A  64      -6.364 -15.582  42.509  1.00127.76           C
ATOM    504  O   THR A  64      -7.271 -16.410  42.431  1.00127.76           O
ATOM    505  N   HIS A  65      -6.543 -14.291  42.151  1.00 80.27           N
ATOM    506  CA  HIS A  65      -7.862 -13.831  41.809  1.00 80.27           C
ATOM    507  ND1 HIS A  65      -7.924 -13.156  45.215  1.00 80.27           N
ATOM    508  CG  HIS A  65      -8.767 -13.233  44.127  1.00 80.27           C
ATOM    509  CB  HIS A  65      -8.420 -12.744  42.749  1.00 80.27           C
ATOM    510  NE2 HIS A  65      -9.804 -14.098  45.935  1.00 80.27           N
ATOM    511  CD2 HIS A  65      -9.911 -13.811  44.585  1.00 80.27           C
ATOM    512  CE1 HIS A  65      -8.595 -13.687  46.269  1.00 80.27           C
ATOM    513  C   HIS A  65      -7.855 -13.234  40.442  1.00 80.27           C
ATOM    514  O   HIS A  65      -6.950 -12.490  40.070  1.00 80.27           O
ATOM    515  N   ASP A  66      -8.912 -13.556  39.671  1.00 62.85           N
ATOM    516  CA  ASP A  66      -9.123 -13.099  38.327  1.00 62.85           C
ATOM    517  CB  ASP A  66     -10.409 -13.693  37.718  1.00 62.85           C
ATOM    518  CG  ASP A  66     -10.535 -13.279  36.260  1.00 62.85           C
ATOM    519  OD1 ASP A  66      -9.584 -12.639  35.737  1.00 62.85           O
ATOM    520  OD2 ASP A  66     -11.585 -13.609  35.646  1.00 62.85           O
ATOM    521  C   ASP A  66      -9.281 -11.603  38.331  1.00 62.85           C
ATOM    522  O   ASP A  66      -9.964 -11.035  39.179  1.00 62.85           O
ATOM    523  N   ILE A  67      -8.516 -10.956  37.431  1.00194.91           N
ATOM    524  CA  ILE A  67      -8.399  -9.575  37.043  1.00194.91           C
ATOM    525  CB  ILE A  67      -7.100  -9.274  36.377  1.00194.91           C
ATOM    526  CG1 ILE A  67      -6.721  -7.794  36.555  1.00194.91           C
ATOM    527  CG2 ILE A  67      -7.305  -9.644  34.899  1.00194.91           C
ATOM    528  CD1 ILE A  67      -6.323  -7.441  37.990  1.00194.91           C
ATOM    529  C   ILE A  67      -9.427  -9.141  36.023  1.00194.91           C
ATOM    530  O   ILE A  67      -9.574  -7.946  35.764  1.00194.91           O
ATOM    531  N   SER A  68     -10.064 -10.096  35.314  1.00100.29           N
ATOM    532  CA  SER A  68     -10.797  -9.828  34.097  1.00100.29           C
ATOM    533  CB  SER A  68     -11.619 -11.035  33.607  1.00100.29           C
ATOM    534  OG  SER A  68     -12.263 -10.716  32.382  1.00100.29           O
ATOM    535  C   SER A  68     -11.722  -8.659  34.214  1.00100.29           C
ATOM    536  O   SER A  68     -11.972  -7.983  33.217  1.00100.29           O
ATOM    537  N   HIS A  69     -12.256  -8.373  35.410  1.00 56.91           N
ATOM    538  CA  HIS A  69     -13.118  -7.234  35.523  1.00 56.91           C
ATOM    539  ND1 HIS A  69     -15.668  -5.606  36.702  1.00 56.91           N
ATOM    540  CG  HIS A  69     -14.412  -5.808  37.229  1.00 56.91           C
ATOM    541  CB  HIS A  69     -13.566  -7.023  36.985  1.00 56.91           C
ATOM    542  NE2 HIS A  69     -15.215  -3.832  37.965  1.00 56.91           N
ATOM    543  CD2 HIS A  69     -14.151  -4.715  37.997  1.00 56.91           C
ATOM    544  CE1 HIS A  69     -16.102  -4.409  37.175  1.00 56.91           C
ATOM    545  C   HIS A  69     -12.351  -6.017  35.082  1.00 56.91           C
ATOM    546  O   HIS A  69     -12.838  -5.232  34.271  1.00 56.91           O
ATOM    547  N   LEU A  70     -11.148  -5.813  35.654  1.00119.11           N
ATOM    548  CA  LEU A  70     -10.278  -4.698  35.378  1.00119.11           C
ATOM    549  CB  LEU A  70      -9.302  -4.418  36.531  1.00119.11           C
ATOM    550  CG  LEU A  70     -10.014  -3.988  37.827  1.00119.11           C
ATOM    551  CD1 LEU A  70     -10.860  -5.134  38.411  1.00119.11           C
ATOM    552  CD2 LEU A  70      -9.017  -3.394  38.834  1.00119.11           C
ATOM    553  C   LEU A  70      -9.457  -4.783  34.116  1.00119.11           C
ATOM    554  O   LEU A  70      -9.258  -3.762  33.456  1.00119.11           O
ATOM    555  N   SER A  71      -8.904  -5.971  33.765  1.00 59.90           N
ATOM    556  CA  SER A  71      -8.022  -5.993  32.626  1.00 59.90           C
ATOM    557  CB  SER A  71      -6.537  -5.868  32.989  1.00 59.90           C
ATOM    558  OG  SER A  71      -5.752  -5.913  31.805  1.00 59.90           O
ATOM    559  C   SER A  71      -8.140  -7.272  31.857  1.00 59.90           C
ATOM    560  O   SER A  71      -8.500  -8.326  32.377  1.00 59.90           O
ATOM    561  N   CYS A  72      -7.867  -7.142  30.547  1.00126.52           N
ATOM    562  CA  CYS A  72      -7.832  -8.122  29.500  1.00126.52           C
ATOM    563  CB  CYS A  72      -8.031  -7.494  28.110  1.00126.52           C
ATOM    564  SG  CYS A  72      -8.272  -8.741  26.813  1.00126.52           S
ATOM    565  C   CYS A  72      -6.531  -8.878  29.498  1.00126.52           C
ATOM    566  O   CYS A  72      -6.358  -9.775  28.676  1.00126.52           O
ATOM    567  N   ALA A  73      -5.541  -8.469  30.322  1.00 58.03           N
ATOM    568  CA  ALA A  73      -4.238  -9.090  30.318  1.00 58.03           C
ATOM    569  CB  ALA A  73      -3.356  -8.645  31.495  1.00 58.03           C
ATOM    570  C   ALA A  73      -4.397 -10.580  30.399  1.00 58.03           C
ATOM    571  O   ALA A  73      -5.107 -11.109  31.252  1.00 58.03           O
ATOM    572  N   ASP A  74      -3.695 -11.294  29.497  1.00103.99           N
ATOM    573  CA  ASP A  74      -3.840 -12.716  29.341  1.00103.99           C
ATOM    574  CB  ASP A  74      -2.944 -13.296  28.232  1.00103.99           C
ATOM    575  CG  ASP A  74      -3.116 -14.810  28.254  1.00103.99           C
ATOM    576  OD1 ASP A  74      -4.116 -15.303  27.665  1.00103.99           O
ATOM    577  OD2 ASP A  74      -2.248 -15.491  28.862  1.00103.99           O
ATOM    578  C   ASP A  74      -3.491 -13.467  30.589  1.00103.99           C
ATOM    579  O   ASP A  74      -4.231 -14.359  31.000  1.00103.99           O
ATOM    580  N   PHE A  75      -2.369 -13.126  31.244  1.00110.18           N
ATOM    581  CA  PHE A  75      -1.938 -13.921  32.361  1.00110.18           C
ATOM    582  CB  PHE A  75      -0.466 -13.672  32.777  1.00110.18           C
ATOM    583  CG  PHE A  75      -0.153 -12.326  33.350  1.00110.18           C
ATOM    584  CD1 PHE A  75      -0.252 -11.162  32.620  1.00110.18           C
ATOM    585  CD2 PHE A  75       0.334 -12.255  34.636  1.00110.18           C
ATOM    586  CE1 PHE A  75       0.076  -9.951  33.191  1.00110.18           C
ATOM    587  CE2 PHE A  75       0.670 -11.053  35.209  1.00110.18           C
ATOM    588  CZ  PHE A  75       0.534  -9.893  34.486  1.00110.18           C
ATOM    589  C   PHE A  75      -2.890 -13.823  33.524  1.00110.18           C
ATOM    590  O   PHE A  75      -3.010 -14.757  34.316  1.00110.18           O
ATOM    591  N   LEU A  76      -3.548 -12.660  33.674  1.00169.00           N
ATOM    592  CA  LEU A  76      -4.494 -12.302  34.704  1.00169.00           C
ATOM    593  CB  LEU A  76      -4.604 -10.785  34.875  1.00169.00           C
ATOM    594  CG  LEU A  76      -3.573 -10.297  35.899  1.00169.00           C
ATOM    595  CD1 LEU A  76      -2.224 -10.949  35.623  1.00169.00           C
ATOM    596  CD2 LEU A  76      -3.483  -8.765  35.954  1.00169.00           C
ATOM    597  C   LEU A  76      -5.867 -12.922  34.613  1.00169.00           C
ATOM    598  O   LEU A  76      -6.669 -12.745  35.530  1.00169.00           O
ATOM    599  N   ARG A  77      -6.229 -13.552  33.481  1.00166.83           N
ATOM    600  CA  ARG A  77      -7.555 -14.074  33.246  1.00166.83           C
ATOM    601  CB  ARG A  77      -7.657 -14.725  31.853  1.00166.83           C
ATOM    602  CG  ARG A  77      -9.057 -15.214  31.468  1.00166.83           C
ATOM    603  CD  ARG A  77      -9.498 -16.535  32.111  1.00166.83           C
ATOM    604  NE  ARG A  77      -8.667 -17.654  31.575  1.00166.83           N
ATOM    605  CZ  ARG A  77      -8.784 -18.036  30.270  1.00166.83           C
ATOM    606  NH1 ARG A  77      -9.366 -17.193  29.367  1.00166.83           N
ATOM    607  NH2 ARG A  77      -8.323 -19.256  29.866  1.00166.83           N
ATOM    608  C   ARG A  77      -7.992 -15.131  34.228  1.00166.83           C
ATOM    609  O   ARG A  77      -9.104 -15.057  34.750  1.00166.83           O
ATOM    610  N   ALA A  78      -7.157 -16.148  34.521  1.00 42.94           N
ATOM    611  CA  ALA A  78      -7.662 -17.217  35.342  1.00 42.94           C
ATOM    612  CB  ALA A  78      -7.703 -18.575  34.618  1.00 42.94           C
ATOM    613  C   ALA A  78      -6.788 -17.399  36.538  1.00 42.94           C
ATOM    614  O   ALA A  78      -5.576 -17.199  36.500  1.00 42.94           O
ATOM    615  N   PRO A  79      -7.409 -17.787  37.614  1.00 78.56           N
ATOM    616  CA  PRO A  79      -6.682 -18.025  38.825  1.00 78.56           C
ATOM    617  CD  PRO A  79      -8.801 -17.462  37.859  1.00 78.56           C
ATOM    618  CB  PRO A  79      -7.724 -18.041  39.945  1.00 78.56           C
ATOM    619  CG  PRO A  79      -9.085 -18.108  39.222  1.00 78.56           C
ATOM    620  C   PRO A  79      -5.901 -19.288  38.674  1.00 78.56           C
ATOM    621  O   PRO A  79      -6.357 -20.180  37.962  1.00 78.56           O
ATOM    622  N   GLY A  80      -4.721 -19.384  39.318  1.00 23.35           N
ATOM    623  CA  GLY A  80      -3.942 -20.586  39.241  1.00 23.35           C
ATOM    624  C   GLY A  80      -2.910 -20.469  38.156  1.00 23.35           C
ATOM    625  O   GLY A  80      -2.057 -21.343  38.016  1.00 23.35           O
ATOM    626  N   VAL A  81      -2.945 -19.388  37.358  1.00 38.57           N
ATOM    627  CA  VAL A  81      -1.979 -19.231  36.304  1.00 38.57           C
ATOM    628  CB  VAL A  81      -2.285 -18.063  35.408  1.00 38.57           C
ATOM    629  CG1 VAL A  81      -1.123 -17.881  34.418  1.00 38.57           C
ATOM    630  CG2 VAL A  81      -3.656 -18.286  34.750  1.00 38.57           C
ATOM    631  C   VAL A  81      -0.653 -18.938  36.935  1.00 38.57           C
ATOM    632  O   VAL A  81      -0.580 -18.208  37.920  1.00 38.57           O
ATOM    633  N   GLN A  82       0.436 -19.513  36.377  1.00 41.16           N
ATOM    634  CA  GLN A  82       1.752 -19.284  36.905  1.00 41.16           C
ATOM    635  CB  GLN A  82       2.426 -20.583  37.391  1.00 41.16           C
ATOM    636  CG  GLN A  82       1.662 -21.277  38.524  1.00 41.16           C
ATOM    637  CD  GLN A  82       2.394 -22.556  38.914  1.00 41.16           C
ATOM    638  OE1 GLN A  82       3.046 -22.621  39.954  1.00 41.16           O
ATOM    639  NE2 GLN A  82       2.282 -23.606  38.058  1.00 41.16           N
ATOM    640  C   GLN A  82       2.590 -18.720  35.795  1.00 41.16           C
ATOM    641  O   GLN A  82       2.538 -19.200  34.664  1.00 41.16           O
ATOM    642  N   THR A  83       3.375 -17.659  36.080  1.00 41.58           N
ATOM    643  CA  THR A  83       4.211 -17.100  35.054  1.00 41.58           C
ATOM    644  CB  THR A  83       3.742 -15.758  34.574  1.00 41.58           C
ATOM    645  OG1 THR A  83       2.419 -15.870  34.069  1.00 41.58           O
ATOM    646  CG2 THR A  83       4.684 -15.264  33.462  1.00 41.58           C
ATOM    647  C   THR A  83       5.591 -16.946  35.610  1.00 41.58           C
ATOM    648  O   THR A  83       5.784 -16.569  36.767  1.00 41.58           O
ATOM    649  N   PRO A  84       6.573 -17.246  34.809  1.00104.31           N
ATOM    650  CA  PRO A  84       7.945 -17.150  35.210  1.00104.31           C
ATOM    651  CD  PRO A  84       6.400 -17.869  33.512  1.00104.31           C
ATOM    652  CB  PRO A  84       8.754 -17.805  34.089  1.00104.31           C
ATOM    653  CG  PRO A  84       7.800 -17.799  32.879  1.00104.31           C
ATOM    654  C   PRO A  84       8.270 -15.708  35.407  1.00104.31           C
ATOM    655  O   PRO A  84       7.769 -14.879  34.648  1.00104.31           O
ATOM    656  N   VAL A  85       9.091 -15.389  36.424  1.00 46.07           N
ATOM    657  CA  VAL A  85       9.466 -14.023  36.641  1.00 46.07           C
ATOM    658  CB  VAL A  85       8.728 -13.361  37.769  1.00 46.07           C
ATOM    659  CG1 VAL A  85       7.228 -13.334  37.433  1.00 46.07           C
ATOM    660  CG2 VAL A  85       9.072 -14.091  39.081  1.00 46.07           C
ATOM    661  C   VAL A  85      10.911 -13.993  37.030  1.00 46.07           C
ATOM    662  O   VAL A  85      11.453 -14.960  37.567  1.00 46.07           O
ATOM    663  N   ILE A  86      11.581 -12.868  36.710  1.00141.40           N
ATOM    664  CA  ILE A  86      12.919 -12.634  37.170  1.00141.40           C
ATOM    665  CB  ILE A  86      13.956 -12.630  36.071  1.00141.40           C
ATOM    666  CG1 ILE A  86      13.729 -11.512  35.039  1.00141.40           C
ATOM    667  CG2 ILE A  86      13.960 -14.039  35.449  1.00141.40           C
ATOM    668  CD1 ILE A  86      14.153 -10.125  35.515  1.00141.40           C
ATOM    669  C   ILE A  86      12.843 -11.319  37.892  1.00141.40           C
ATOM    670  O   ILE A  86      12.197 -10.385  37.420  1.00141.40           O
ATOM    671  N   VAL A  87      13.457 -11.215  39.091  1.00105.02           N
ATOM    672  CA  VAL A  87      13.314 -10.013  39.872  1.00105.02           C
ATOM    673  CB  VAL A  87      12.637 -10.256  41.194  1.00105.02           C
ATOM    674  CG1 VAL A  87      13.512 -11.219  42.016  1.00105.02           C
ATOM    675  CG2 VAL A  87      12.411  -8.908  41.897  1.00105.02           C
ATOM    676  C   VAL A  87      14.661  -9.442  40.191  1.00105.02           C
ATOM    677  O   VAL A  87      15.650 -10.171  40.276  1.00105.02           O
ATOM    678  N   ARG A  88      14.732  -8.096  40.342  1.00154.26           N
ATOM    679  CA  ARG A  88      15.959  -7.464  40.741  1.00154.26           C
ATOM    680  CB  ARG A  88      16.775  -6.859  39.583  1.00154.26           C
ATOM    681  CG  ARG A  88      18.217  -6.532  39.993  1.00154.26           C
ATOM    682  CD  ARG A  88      19.139  -6.152  38.830  1.00154.26           C
ATOM    683  NE  ARG A  88      18.891  -4.717  38.529  1.00154.26           N
ATOM    684  CZ  ARG A  88      19.518  -3.746  39.256  1.00154.26           C
ATOM    685  NH1 ARG A  88      20.437  -4.090  40.203  1.00154.26           N
ATOM    686  NH2 ARG A  88      19.215  -2.432  39.052  1.00154.26           N
ATOM    687  C   ARG A  88      15.636  -6.387  41.734  1.00154.26           C
ATOM    688  O   ARG A  88      14.758  -5.557  41.507  1.00154.26           O
ATOM    689  N   PHE A  89      16.348  -6.395  42.880  1.00157.28           N
ATOM    690  CA  PHE A  89      16.153  -5.421  43.917  1.00157.28           C
ATOM    691  CB  PHE A  89      15.922  -6.047  45.306  1.00157.28           C
ATOM    692  CG  PHE A  89      14.750  -6.972  45.213  1.00157.28           C
ATOM    693  CD1 PHE A  89      13.473  -6.478  45.093  1.00157.28           C
ATOM    694  CD2 PHE A  89      14.928  -8.339  45.209  1.00157.28           C
ATOM    695  CE1 PHE A  89      12.396  -7.331  45.000  1.00157.28           C
ATOM    696  CE2 PHE A  89      13.856  -9.197  45.118  1.00157.28           C
ATOM    697  CZ  PHE A  89      12.584  -8.693  45.016  1.00157.28           C
ATOM    698  C   PHE A  89      17.431  -4.637  43.962  1.00157.28           C
ATOM    699  O   PHE A  89      18.489  -5.172  43.633  1.00157.28           O
ATOM    700  N   SER A  90      17.372  -3.341  44.344  1.00 69.57           N
ATOM    701  CA  SER A  90      18.570  -2.553  44.271  1.00 69.57           C
ATOM    702  CB  SER A  90      18.890  -2.096  42.839  1.00 69.57           C
ATOM    703  OG  SER A  90      17.790  -1.384  42.295  1.00 69.57           O
ATOM    704  C   SER A  90      18.482  -1.339  45.148  1.00 69.57           C
ATOM    705  O   SER A  90      17.457  -1.072  45.773  1.00 69.57           O
ATOM    706  N   THR A  91      19.622  -0.622  45.269  1.00153.36           N
ATOM    707  CA  THR A  91      19.718   0.641  45.945  1.00153.36           C
ATOM    708  CB  THR A  91      21.041   0.840  46.611  1.00153.36           C
ATOM    709  OG1 THR A  91      21.355  -0.285  47.415  1.00153.36           O
ATOM    710  CG2 THR A  91      20.937   2.068  47.520  1.00153.36           C
ATOM    711  C   THR A  91      19.657   1.636  44.821  1.00153.36           C
ATOM    712  O   THR A  91      19.481   1.228  43.675  1.00153.36           O
ATOM    713  N   VAL A  92      19.582   2.952  45.121  1.00131.01           N
ATOM    714  CA  VAL A  92      19.559   3.952  44.087  1.00131.01           C
ATOM    715  CB  VAL A  92      18.592   5.034  44.464  1.00131.01           C
ATOM    716  CG1 VAL A  92      18.631   6.156  43.420  1.00131.01           C
ATOM    717  CG2 VAL A  92      17.209   4.391  44.644  1.00131.01           C
ATOM    718  C   VAL A  92      20.840   4.641  43.672  1.00131.01           C
ATOM    719  O   VAL A  92      21.330   4.496  42.552  1.00131.01           O
ATOM    720  N   ILE A  93      21.392   5.440  44.611  1.00188.80           N
ATOM    721  CA  ILE A  93      22.364   6.433  44.226  1.00188.80           C
ATOM    722  CB  ILE A  93      22.366   7.638  45.127  1.00188.80           C
ATOM    723  CG1 ILE A  93      22.697   8.877  44.286  1.00188.80           C
ATOM    724  CG2 ILE A  93      23.386   7.428  46.252  1.00188.80           C
ATOM    725  CD1 ILE A  93      21.619   9.168  43.236  1.00188.80           C
ATOM    726  C   ILE A  93      23.761   5.934  43.988  1.00188.80           C
ATOM    727  O   ILE A  93      24.396   6.306  43.002  1.00188.80           O
ATOM    728  N   HIS A  94      24.279   5.075  44.888  1.00 82.78           N
ATOM    729  CA  HIS A  94      25.650   4.637  44.858  1.00 82.78           C
ATOM    730  ND1 HIS A  94      25.018   5.669  47.967  1.00 82.78           N
ATOM    731  CG  HIS A  94      26.120   5.327  47.217  1.00 82.78           C
ATOM    732  CB  HIS A  94      26.153   4.187  46.239  1.00 82.78           C
ATOM    733  NE2 HIS A  94      26.613   7.131  48.482  1.00 82.78           N
ATOM    734  CD2 HIS A  94      27.086   6.230  47.542  1.00 82.78           C
ATOM    735  CE1 HIS A  94      25.368   6.753  48.704  1.00 82.78           C
ATOM    736  C   HIS A  94      25.868   3.541  43.851  1.00 82.78           C
ATOM    737  O   HIS A  94      24.929   2.959  43.317  1.00 82.78           O
ATOM    738  N   GLU A  95      27.159   3.248  43.577  1.00110.71           N
ATOM    739  CA  GLU A  95      27.620   2.392  42.513  1.00110.71           C
ATOM    740  CB  GLU A  95      29.064   2.736  42.102  1.00110.71           C
ATOM    741  CG  GLU A  95      29.315   4.234  41.874  1.00110.71           C
ATOM    742  CD  GLU A  95      28.747   4.686  40.536  1.00110.71           C
ATOM    743  OE1 GLU A  95      27.502   4.863  40.446  1.00110.71           O
ATOM    744  OE2 GLU A  95      29.559   4.876  39.590  1.00110.71           O
ATOM    745  C   GLU A  95      27.636   0.946  42.906  1.00110.71           C
ATOM    746  O   GLU A  95      27.212   0.558  43.994  1.00110.71           O
ATOM    747  N   ARG A  96      28.115   0.098  41.966  1.00145.66           N
ATOM    748  CA  ARG A  96      28.228  -1.317  42.174  1.00145.66           C
ATOM    749  CB  ARG A  96      28.718  -2.061  40.917  1.00145.66           C
ATOM    750  CG  ARG A  96      30.036  -1.503  40.377  1.00145.66           C
ATOM    751  CD  ARG A  96      30.053  -1.355  38.851  1.00145.66           C
ATOM    752  NE  ARG A  96      30.475  -2.645  38.232  1.00145.66           N
ATOM    753  CZ  ARG A  96      29.582  -3.648  37.985  1.00145.66           C
ATOM    754  NH1 ARG A  96      28.309  -3.579  38.472  1.00145.66           N
ATOM    755  NH2 ARG A  96      29.970  -4.723  37.237  1.00145.66           N
ATOM    756  C   ARG A  96      29.188  -1.522  43.302  1.00145.66           C
ATOM    757  O   ARG A  96      30.193  -0.840  43.391  1.00145.66           O
ATOM    758  N   GLY A  97      28.881  -2.434  44.242  1.00 27.82           N
ATOM    759  CA  GLY A  97      29.807  -2.701  45.306  1.00 27.82           C
ATOM    760  C   GLY A  97      29.648  -1.700  46.413  1.00 27.82           C
ATOM    761  O   GLY A  97      30.427  -1.700  47.366  1.00 27.82           O
ATOM    762  N   SER A  98      28.646  -0.806  46.311  1.00 45.08           N
ATOM    763  CA  SER A  98      28.397   0.146  47.358  1.00 45.08           C
ATOM    764  CB  SER A  98      27.503   1.318  46.910  1.00 45.08           C
ATOM    765  OG  SER A  98      27.310   2.235  47.977  1.00 45.08           O
ATOM    766  C   SER A  98      27.698  -0.602  48.461  1.00 45.08           C
ATOM    767  O   SER A  98      27.052  -1.621  48.215  1.00 45.08           O
ATOM    768  N   PRO A  99      27.789  -0.131  49.679  1.00 84.79           N
ATOM    769  CA  PRO A  99      27.182  -0.845  50.766  1.00 84.79           C
ATOM    770  CD  PRO A  99      28.925   0.663  50.114  1.00 84.79           C
ATOM    771  CB  PRO A  99      27.688  -0.173  52.037  1.00 84.79           C
ATOM    772  CG  PRO A  99      29.060   0.390  51.623  1.00 84.79           C
ATOM    773  C   PRO A  99      25.691  -0.862  50.637  1.00 84.79           C
ATOM    774  O   PRO A  99      25.113   0.080  50.103  1.00 84.79           O
ATOM    775  N   GLU A 100      25.067  -1.972  51.055  1.00127.58           N
ATOM    776  CA  GLU A 100      23.645  -2.169  51.066  1.00127.58           C
ATOM    777  CB  GLU A 100      23.237  -3.640  50.934  1.00127.58           C
ATOM    778  CG  GLU A 100      23.424  -4.094  49.485  1.00127.58           C
ATOM    779  CD  GLU A 100      23.343  -5.605  49.416  1.00127.58           C
ATOM    780  OE1 GLU A 100      23.898  -6.259  50.337  1.00127.58           O
ATOM    781  OE2 GLU A 100      22.738  -6.124  48.442  1.00127.58           O
ATOM    782  C   GLU A 100      22.999  -1.509  52.256  1.00127.58           C
ATOM    783  O   GLU A 100      21.789  -1.598  52.435  1.00127.58           O
ATOM    784  N   THR A 101      23.817  -0.989  53.185  1.00106.46           N
ATOM    785  CA  THR A 101      23.431  -0.340  54.417  1.00106.46           C
ATOM    786  CB  THR A 101      24.516  -0.383  55.456  1.00106.46           C
ATOM    787  OG1 THR A 101      25.681   0.285  54.995  1.00106.46           O
ATOM    788  CG2 THR A 101      24.845  -1.857  55.741  1.00106.46           C
ATOM    789  C   THR A 101      22.999   1.095  54.272  1.00106.46           C
ATOM    790  O   THR A 101      22.604   1.700  55.265  1.00106.46           O
ATOM    791  N   LEU A 102      23.182   1.728  53.098  1.00 76.06           N
ATOM    792  CA  LEU A 102      22.910   3.137  52.934  1.00 76.06           C
ATOM    793  CB  LEU A 102      23.657   3.708  51.718  1.00 76.06           C
ATOM    794  CG  LEU A 102      25.185   3.518  51.827  1.00 76.06           C
ATOM    795  CD1 LEU A 102      25.920   4.088  50.605  1.00 76.06           C
ATOM    796  CD2 LEU A 102      25.724   4.075  53.153  1.00 76.06           C
ATOM    797  C   LEU A 102      21.443   3.449  52.790  1.00 76.06           C
ATOM    798  O   LEU A 102      20.646   2.619  52.354  1.00 76.06           O
ATOM    799  N   ARG A 103      21.054   4.688  53.189  1.00155.78           N
ATOM    800  CA  ARG A 103      19.691   5.136  53.075  1.00155.78           C
ATOM    801  CB  ARG A 103      19.352   6.387  53.911  1.00155.78           C
ATOM    802  CG  ARG A 103      20.137   7.636  53.506  1.00155.78           C
ATOM    803  CD  ARG A 103      19.720   8.916  54.243  1.00155.78           C
ATOM    804  NE  ARG A 103      20.059   8.733  55.681  1.00155.78           N
ATOM    805  CZ  ARG A 103      19.090   8.313  56.542  1.00155.78           C
ATOM    806  NH1 ARG A 103      17.809   8.180  56.091  1.00155.78           N
ATOM    807  NH2 ARG A 103      19.396   8.024  57.841  1.00155.78           N
ATOM    808  C   ARG A 103      19.430   5.483  51.636  1.00155.78           C
ATOM    809  O   ARG A 103      20.186   6.228  51.013  1.00155.78           O
ATOM    810  N   ASP A 104      18.337   4.925  51.078  1.00111.66           N
ATOM    811  CA  ASP A 104      17.915   5.140  49.718  1.00111.66           C
ATOM    812  CB  ASP A 104      18.796   4.496  48.625  1.00111.66           C
ATOM    813  CG  ASP A 104      19.941   5.399  48.185  1.00111.66           C
ATOM    814  OD1 ASP A 104      19.728   6.637  48.095  1.00111.66           O
ATOM    815  OD2 ASP A 104      21.036   4.852  47.889  1.00111.66           O
ATOM    816  C   ASP A 104      16.609   4.445  49.557  1.00111.66           C
ATOM    817  O   ASP A 104      16.251   3.581  50.356  1.00111.66           O
ATOM    818  N   PRO A 105      15.880   4.799  48.534  1.00 93.53           N
ATOM    819  CA  PRO A 105      14.707   4.041  48.219  1.00 93.53           C
ATOM    820  CD  PRO A 105      15.786   6.177  48.083  1.00 93.53           C
ATOM    821  CB  PRO A 105      13.998   4.831  47.121  1.00 93.53           C
ATOM    822  CG  PRO A 105      14.407   6.288  47.404  1.00 93.53           C
ATOM    823  C   PRO A 105      15.274   2.726  47.767  1.00 93.53           C
ATOM    824  O   PRO A 105      16.463   2.684  47.456  1.00 93.53           O
ATOM    825  N   ARG A 106      14.489   1.632  47.797  1.00142.56           N
ATOM    826  CA  ARG A 106      14.984   0.367  47.321  1.00142.56           C
ATOM    827  CB  ARG A 106      14.831  -0.798  48.315  1.00142.56           C
ATOM    828  CG  ARG A 106      16.060  -1.059  49.184  1.00142.56           C
ATOM    829  CD  ARG A 106      16.494   0.113  50.057  1.00142.56           C
ATOM    830  NE  ARG A 106      17.652  -0.366  50.859  1.00142.56           N
ATOM    831  CZ  ARG A 106      18.729   0.446  51.056  1.00142.56           C
ATOM    832  NH1 ARG A 106      18.762   1.683  50.483  1.00142.56           N
ATOM    833  NH2 ARG A 106      19.771   0.021  51.825  1.00142.56           N
ATOM    834  C   ARG A 106      14.204  -0.021  46.099  1.00142.56           C
ATOM    835  O   ARG A 106      12.977  -0.080  46.128  1.00142.56           O
ATOM    836  N   GLY A 107      14.917  -0.320  44.993  1.00 38.66           N
ATOM    837  CA  GLY A 107      14.283  -0.688  43.756  1.00 38.66           C
ATOM    838  C   GLY A 107      13.674  -2.053  43.877  1.00 38.66           C
ATOM    839  O   GLY A 107      14.223  -2.939  44.531  1.00 38.66           O
ATOM    840  N   PHE A 108      12.504  -2.240  43.223  1.00166.25           N
ATOM    841  CA  PHE A 108      11.778  -3.484  43.225  1.00166.25           C
ATOM    842  CB  PHE A 108      10.501  -3.354  44.075  1.00166.25           C
ATOM    843  CG  PHE A 108       9.940  -4.685  44.439  1.00166.25           C
ATOM    844  CD1 PHE A 108       9.287  -5.468  43.516  1.00166.25           C
ATOM    845  CD2 PHE A 108      10.041  -5.128  45.738  1.00166.25           C
ATOM    846  CE1 PHE A 108       8.766  -6.687  43.885  1.00166.25           C
ATOM    847  CE2 PHE A 108       9.521  -6.344  46.111  1.00166.25           C
ATOM    848  CZ  PHE A 108       8.883  -7.127  45.182  1.00166.25           C
ATOM    849  C   PHE A 108      11.346  -3.722  41.795  1.00166.25           C
ATOM    850  O   PHE A 108      10.344  -3.162  41.350  1.00166.25           O
ATOM    851  N   ALA A 109      12.058  -4.593  41.042  1.00 48.37           N
ATOM    852  CA  ALA A 109      11.725  -4.781  39.649  1.00 48.37           C
ATOM    853  CB  ALA A 109      12.859  -4.390  38.688  1.00 48.37           C
ATOM    854  C   ALA A 109      11.400  -6.228  39.381  1.00 48.37           C
ATOM    855  O   ALA A 109      12.099  -7.131  39.840  1.00 48.37           O
ATOM    856  N   VAL A 110      10.313  -6.481  38.611  1.00 54.37           N
ATOM    857  CA  VAL A 110       9.913  -7.827  38.284  1.00 54.37           C
ATOM    858  CB  VAL A 110       8.722  -8.285  39.075  1.00 54.37           C
ATOM    859  CG1 VAL A 110       8.300  -9.686  38.599  1.00 54.37           C
ATOM    860  CG2 VAL A 110       9.095  -8.219  40.565  1.00 54.37           C
ATOM    861  C   VAL A 110       9.548  -7.917  36.830  1.00 54.37           C
ATOM    862  O   VAL A 110       8.698  -7.180  36.335  1.00 54.37           O
ATOM    863  N   LYS A 111      10.176  -8.871  36.114  1.00117.46           N
ATOM    864  CA  LYS A 111       9.930  -9.103  34.717  1.00117.46           C
ATOM    865  CB  LYS A 111      11.225  -9.416  33.948  1.00117.46           C
ATOM    866  CG  LYS A 111      11.037  -9.623  32.446  1.00117.46           C
ATOM    867  CD  LYS A 111      12.359  -9.837  31.705  1.00117.46           C
ATOM    868  CE  LYS A 111      13.258  -8.602  31.659  1.00117.46           C
ATOM    869  NZ  LYS A 111      12.667  -7.579  30.770  1.00117.46           N
ATOM    870  C   LYS A 111       9.069 -10.329  34.628  1.00117.46           C
ATOM    871  O   LYS A 111       9.431 -11.393  35.131  1.00117.46           O
ATOM    872  N   PHE A 112       7.898 -10.198  33.970  1.00 68.94           N
ATOM    873  CA  PHE A 112       6.976 -11.287  33.811  1.00 68.94           C
ATOM    874  CB  PHE A 112       5.507 -10.855  33.982  1.00 68.94           C
ATOM    875  CG  PHE A 112       5.245 -10.523  35.410  1.00 68.94           C
ATOM    876  CD1 PHE A 112       5.800  -9.407  35.993  1.00 68.94           C
ATOM    877  CD2 PHE A 112       4.407 -11.317  36.159  1.00 68.94           C
ATOM    878  CE1 PHE A 112       5.544  -9.103  37.311  1.00 68.94           C
ATOM    879  CE2 PHE A 112       4.147 -11.018  37.475  1.00 68.94           C
ATOM    880  CZ  PHE A 112       4.716  -9.910  38.057  1.00 68.94           C
ATOM    881  C   PHE A 112       7.098 -11.759  32.399  1.00 68.94           C
ATOM    882  O   PHE A 112       6.907 -10.982  31.465  1.00 68.94           O
ATOM    883  N   TYR A 113       7.393 -13.061  32.200  1.00 71.87           N
ATOM    884  CA  TYR A 113       7.507 -13.534  30.852  1.00 71.87           C
ATOM    885  CB  TYR A 113       8.568 -14.634  30.664  1.00 71.87           C
ATOM    886  CG  TYR A 113       9.907 -14.133  31.096  1.00 71.87           C
ATOM    887  CD1 TYR A 113      10.316 -14.291  32.400  1.00 71.87           C
ATOM    888  CD2 TYR A 113      10.758 -13.513  30.209  1.00 71.87           C
ATOM    889  CE1 TYR A 113      11.548 -13.845  32.816  1.00 71.87           C
ATOM    890  CE2 TYR A 113      11.993 -13.063  30.619  1.00 71.87           C
ATOM    891  CZ  TYR A 113      12.391 -13.230  31.923  1.00 71.87           C
ATOM    892  OH  TYR A 113      13.657 -12.772  32.345  1.00 71.87           O
ATOM    893  C   TYR A 113       6.184 -14.164  30.553  1.00 71.87           C
ATOM    894  O   TYR A 113       5.976 -15.349  30.805  1.00 71.87           O
ATOM    895  N   THR A 114       5.264 -13.356  29.987  1.00 58.17           N
ATOM    896  CA  THR A 114       3.902 -13.729  29.712  1.00 58.17           C
ATOM    897  CB  THR A 114       2.983 -12.535  29.842  1.00 58.17           C
ATOM    898  OG1 THR A 114       3.062 -12.023  31.162  1.00 58.17           O
ATOM    899  CG2 THR A 114       1.524 -12.902  29.520  1.00 58.17           C
ATOM    900  C   THR A 114       3.782 -14.295  28.325  1.00 58.17           C
ATOM    901  O   THR A 114       4.655 -14.121  27.478  1.00 58.17           O
ATOM    902  N   ARG A 115       2.668 -15.012  28.066  1.00181.68           N
ATOM    903  CA  ARG A 115       2.400 -15.594  26.784  1.00181.68           C
ATOM    904  CB  ARG A 115       1.157 -16.501  26.789  1.00181.68           C
ATOM    905  CG  ARG A 115      -0.144 -15.774  27.117  1.00181.68           C
ATOM    906  CD  ARG A 115      -0.772 -15.086  25.906  1.00181.68           C
ATOM    907  NE  ARG A 115      -1.783 -16.034  25.359  1.00181.68           N
ATOM    908  CZ  ARG A 115      -2.937 -15.554  24.812  1.00181.68           C
ATOM    909  NH1 ARG A 115      -3.124 -14.207  24.696  1.00181.68           N
ATOM    910  NH2 ARG A 115      -3.907 -16.419  24.396  1.00181.68           N
ATOM    911  C   ARG A 115       2.220 -14.490  25.775  1.00181.68           C
ATOM    912  O   ARG A 115       2.540 -14.666  24.604  1.00181.68           O
ATOM    913  N   GLU A 116       1.619 -13.359  26.195  1.00130.56           N
ATOM    914  CA  GLU A 116       1.373 -12.169  25.415  1.00130.56           C
ATOM    915  CB  GLU A 116       0.103 -11.391  25.804  1.00130.56           C
ATOM    916  CG  GLU A 116      -1.169 -12.129  25.368  1.00130.56           C
ATOM    917  CD  GLU A 116      -2.332 -11.146  25.320  1.00130.56           C
ATOM    918  OE1 GLU A 116      -2.131  -9.972  25.734  1.00130.56           O
ATOM    919  OE2 GLU A 116      -3.432 -11.551  24.863  1.00130.56           O
ATOM    920  C   GLU A 116       2.543 -11.223  25.338  1.00130.56           C
ATOM    921  O   GLU A 116       2.371 -10.124  24.817  1.00130.56           O
ATOM    922  N   GLY A 117       3.687 -11.505  25.998  1.00 50.93           N
ATOM    923  CA  GLY A 117       4.819 -10.615  25.912  1.00 50.93           C
ATOM    924  C   GLY A 117       5.339 -10.373  27.300  1.00 50.93           C
ATOM    925  O   GLY A 117       4.817 -10.908  28.277  1.00 50.93           O
ATOM    926  N   ASN A 118       6.413  -9.562  27.422  1.00 56.40           N
ATOM    927  CA  ASN A 118       6.964  -9.277  28.718  1.00 56.40           C
ATOM    928  CB  ASN A 118       8.477  -8.997  28.699  1.00 56.40           C
ATOM    929  CG  ASN A 118       9.186 -10.297  28.354  1.00 56.40           C
ATOM    930  OD1 ASN A 118       8.545 -11.325  28.136  1.00 56.40           O
ATOM    931  ND2 ASN A 118      10.545 -10.258  28.316  1.00 56.40           N
ATOM    932  C   ASN A 118       6.304  -8.064  29.302  1.00 56.40           C
ATOM    933  O   ASN A 118       6.020  -7.094  28.599  1.00 56.40           O
ATOM    934  N   PHE A 119       6.027  -8.116  30.625  1.00115.30           N
ATOM    935  CA  PHE A 119       5.521  -6.980  31.343  1.00115.30           C
ATOM    936  CB  PHE A 119       4.161  -7.207  32.023  1.00115.30           C
ATOM    937  CG  PHE A 119       3.790  -5.914  32.662  1.00115.30           C
ATOM    938  CD1 PHE A 119       4.190  -5.624  33.945  1.00115.30           C
ATOM    939  CD2 PHE A 119       3.055  -4.982  31.968  1.00115.30           C
ATOM    940  CE1 PHE A 119       3.852  -4.428  34.534  1.00115.30           C
ATOM    941  CE2 PHE A 119       2.711  -3.782  32.548  1.00115.30           C
ATOM    942  CZ  PHE A 119       3.109  -3.505  33.834  1.00115.30           C
ATOM    943  C   PHE A 119       6.502  -6.711  32.444  1.00115.30           C
ATOM    944  O   PHE A 119       6.827  -7.593  33.239  1.00115.30           O
ATOM    945  N   ASP A 120       7.002  -5.466  32.528  1.00 70.60           N
ATOM    946  CA  ASP A 120       7.972  -5.171  33.540  1.00 70.60           C
ATOM    947  CB  ASP A 120       9.168  -4.352  33.021  1.00 70.60           C
ATOM    948  CG  ASP A 120       9.933  -5.176  31.995  1.00 70.60           C
ATOM    949  OD1 ASP A 120       9.585  -6.372  31.810  1.00 70.60           O
ATOM    950  OD2 ASP A 120      10.870  -4.612  31.370  1.00 70.60           O
ATOM    951  C   ASP A 120       7.331  -4.347  34.607  1.00 70.60           C
ATOM    952  O   ASP A 120       6.721  -3.315  34.324  1.00 70.60           O
ATOM    953  N   LEU A 121       7.419  -4.816  35.869  1.00114.78           N
ATOM    954  CA  LEU A 121       6.987  -3.986  36.954  1.00114.78           C
ATOM    955  CB  LEU A 121       6.268  -4.729  38.097  1.00114.78           C
ATOM    956  CG  LEU A 121       5.678  -3.795  39.179  1.00114.78           C
ATOM    957  CD1 LEU A 121       6.764  -3.081  40.001  1.00114.78           C
ATOM    958  CD2 LEU A 121       4.664  -2.816  38.564  1.00114.78           C
ATOM    959  C   LEU A 121       8.264  -3.412  37.491  1.00114.78           C
ATOM    960  O   LEU A 121       9.183  -4.152  37.839  1.00114.78           O
ATOM    961  N   VAL A 122       8.373  -2.068  37.516  1.00 72.47           N
ATOM    962  CA  VAL A 122       9.561  -1.437  38.016  1.00 72.47           C
ATOM    963  CB  VAL A 122      10.330  -0.714  36.945  1.00 72.47           C
ATOM    964  CG1 VAL A 122      11.553  -0.021  37.572  1.00 72.47           C
ATOM    965  CG2 VAL A 122      10.684  -1.729  35.842  1.00 72.47           C
ATOM    966  C   VAL A 122       9.098  -0.420  39.013  1.00 72.47           C
ATOM    967  O   VAL A 122       8.590   0.636  38.636  1.00 72.47           O
ATOM    968  N   GLY A 123       9.311  -0.696  40.317  1.00 59.33           N
ATOM    969  CA  GLY A 123       8.839   0.177  41.360  1.00 59.33           C
ATOM    970  C   GLY A 123       9.895   0.280  42.422  1.00 59.33           C
ATOM    971  O   GLY A 123      11.000  -0.234  42.258  1.00 59.33           O
ATOM    972  N   ASN A 124       9.568   0.992  43.528  1.00 62.31           N
ATOM    973  CA  ASN A 124      10.419   1.157  44.682  1.00 62.31           C
ATOM    974  CB  ASN A 124      10.831   2.612  44.977  1.00 62.31           C
ATOM    975  CG  ASN A 124      11.926   3.027  44.008  1.00 62.31           C
ATOM    976  OD1 ASN A 124      12.878   2.282  43.779  1.00 62.31           O
ATOM    977  ND2 ASN A 124      11.799   4.253  43.431  1.00 62.31           N
ATOM    978  C   ASN A 124       9.627   0.714  45.879  1.00 62.31           C
ATOM    979  O   ASN A 124       8.416   0.515  45.791  1.00 62.31           O
ATOM    980  N   ASN A 125      10.302   0.503  47.032  1.00 54.26           N
ATOM    981  CA  ASN A 125       9.600   0.116  48.227  1.00 54.26           C
ATOM    982  CB  ASN A 125      10.534  -0.293  49.387  1.00 54.26           C
ATOM    983  CG  ASN A 125      11.452   0.867  49.746  1.00 54.26           C
ATOM    984  OD1 ASN A 125      11.729   1.738  48.923  1.00 54.26           O
ATOM    985  ND2 ASN A 125      11.962   0.864  51.008  1.00 54.26           N
ATOM    986  C   ASN A 125       8.716   1.248  48.670  1.00 54.26           C
ATOM    987  O   ASN A 125       7.560   1.024  49.025  1.00 54.26           O
ATOM    988  N   PHE A 126       9.230   2.497  48.628  1.00126.65           N
ATOM    989  CA  PHE A 126       8.491   3.655  49.074  1.00126.65           C
ATOM    990  CB  PHE A 126       9.305   4.959  49.141  1.00126.65           C
ATOM    991  CG  PHE A 126      10.338   4.890  50.205  1.00126.65           C
ATOM    992  CD1 PHE A 126      10.027   5.265  51.490  1.00126.65           C
ATOM    993  CD2 PHE A 126      11.614   4.468  49.919  1.00126.65           C
ATOM    994  CE1 PHE A 126      10.982   5.210  52.475  1.00126.65           C
ATOM    995  CE2 PHE A 126      12.572   4.412  50.903  1.00126.65           C
ATOM    996  CZ  PHE A 126      12.256   4.784  52.187  1.00126.65           C
ATOM    997  C   PHE A 126       7.410   3.955  48.078  1.00126.65           C
ATOM    998  O   PHE A 126       7.634   3.905  46.872  1.00126.65           O
ATOM    999  N   PRO A 127       6.246   4.294  48.577  1.00100.68           N
ATOM   1000  CA  PRO A 127       5.078   4.554  47.764  1.00100.68           C
ATOM   1001  CD  PRO A 127       5.891   3.942  49.941  1.00100.68           C
ATOM   1002  CB  PRO A 127       3.873   4.403  48.701  1.00100.68           C
ATOM   1003  CG  PRO A 127       4.464   4.478  50.118  1.00100.68           C
ATOM   1004  C   PRO A 127       5.044   5.843  46.989  1.00100.68           C
ATOM   1005  O   PRO A 127       4.132   6.003  46.175  1.00100.68           O
ATOM   1006  N   VAL A 128       5.979   6.783  47.228  1.00137.21           N
ATOM   1007  CA  VAL A 128       5.925   8.075  46.590  1.00137.21           C
ATOM   1008  CB  VAL A 128       5.502   9.115  47.604  1.00137.21           C
ATOM   1009  CG1 VAL A 128       6.504   9.096  48.769  1.00137.21           C
ATOM   1010  CG2 VAL A 128       5.358  10.493  46.960  1.00137.21           C
ATOM   1011  C   VAL A 128       7.292   8.409  46.057  1.00137.21           C
ATOM   1012  O   VAL A 128       8.243   7.656  46.260  1.00137.21           O
ATOM   1013  N   PHE A 129       7.406   9.533  45.307  1.00118.73           N
ATOM   1014  CA  PHE A 129       8.660   9.949  44.755  1.00118.73           C
ATOM   1015  CB  PHE A 129       8.704   9.739  43.229  1.00118.73           C
ATOM   1016  CG  PHE A 129      10.123   9.671  42.782  1.00118.73           C
ATOM   1017  CD1 PHE A 129      10.859   8.539  43.042  1.00118.73           C
ATOM   1018  CD2 PHE A 129      10.723  10.718  42.122  1.00118.73           C
ATOM   1019  CE1 PHE A 129      12.170   8.443  42.643  1.00118.73           C
ATOM   1020  CE2 PHE A 129      12.035  10.630  41.718  1.00118.73           C
ATOM   1021  CZ  PHE A 129      12.760   9.491  41.977  1.00118.73           C
ATOM   1022  C   PHE A 129       8.885  11.403  45.098  1.00118.73           C
ATOM   1023  O   PHE A 129       7.973  12.107  45.530  1.00118.73           O
ATOM   1024  N   PHE A 130      10.144  11.872  44.954  1.00147.97           N
ATOM   1025  CA  PHE A 130      10.586  13.204  45.285  1.00147.97           C
ATOM   1026  CB  PHE A 130      12.113  13.364  45.162  1.00147.97           C
ATOM   1027  CG  PHE A 130      12.761  12.376  46.070  1.00147.97           C
ATOM   1028  CD1 PHE A 130      13.053  12.698  47.375  1.00147.97           C
ATOM   1029  CD2 PHE A 130      13.077  11.120  45.606  1.00147.97           C
ATOM   1030  CE1 PHE A 130      13.654  11.778  48.204  1.00147.97           C
ATOM   1031  CE2 PHE A 130      13.677  10.196  46.428  1.00147.97           C
ATOM   1032  CZ  PHE A 130      13.968  10.525  47.730  1.00147.97           C
ATOM   1033  C   PHE A 130       9.983  14.216  44.352  1.00147.97           C
ATOM   1034  O   PHE A 130       9.703  15.341  44.766  1.00147.97           O
ATOM   1035  N   VAL A 131       9.819  13.856  43.058  1.00130.94           N
ATOM   1036  CA  VAL A 131       9.383  14.792  42.047  1.00130.94           C
ATOM   1037  CB  VAL A 131      10.485  15.221  41.126  1.00130.94           C
ATOM   1038  CG1 VAL A 131      10.907  14.016  40.268  1.00130.94           C
ATOM   1039  CG2 VAL A 131       9.991  16.433  40.321  1.00130.94           C
ATOM   1040  C   VAL A 131       8.306  14.176  41.187  1.00130.94           C
ATOM   1041  O   VAL A 131       8.066  12.970  41.222  1.00130.94           O
ATOM   1042  N   ARG A 132       7.509  15.054  40.538  1.00232.30           N
ATOM   1043  CA  ARG A 132       6.405  14.762  39.654  1.00232.30           C
ATOM   1044  CB  ARG A 132       5.216  15.719  39.878  1.00232.30           C
ATOM   1045  CG  ARG A 132       5.548  17.202  39.687  1.00232.30           C
ATOM   1046  CD  ARG A 132       4.492  18.149  40.272  1.00232.30           C
ATOM   1047  NE  ARG A 132       4.168  17.661  41.642  1.00232.30           N
ATOM   1048  CZ  ARG A 132       4.089  18.518  42.702  1.00232.30           C
ATOM   1049  NH1 ARG A 132       4.422  19.834  42.561  1.00232.30           N
ATOM   1050  NH2 ARG A 132       3.670  18.047  43.913  1.00232.30           N
ATOM   1051  C   ARG A 132       6.671  14.708  38.174  1.00232.30           C
ATOM   1052  O   ARG A 132       5.796  14.269  37.430  1.00232.30           O
ATOM   1053  N   ASP A 133       7.785  15.284  37.682  1.00 89.49           N
ATOM   1054  CA  ASP A 133       7.979  15.397  36.255  1.00 89.49           C
ATOM   1055  CB  ASP A 133       7.878  16.868  35.812  1.00 89.49           C
ATOM   1056  CG  ASP A 133       7.638  16.971  34.315  1.00 89.49           C
ATOM   1057  OD1 ASP A 133       8.051  16.046  33.568  1.00 89.49           O
ATOM   1058  OD2 ASP A 133       7.026  17.994  33.903  1.00 89.49           O
ATOM   1059  C   ASP A 133       9.363  14.900  35.926  1.00 89.49           C
ATOM   1060  O   ASP A 133      10.316  15.163  36.656  1.00 89.49           O
ATOM   1061  N   GLY A 134       9.504  14.194  34.785  1.00 47.10           N
ATOM   1062  CA  GLY A 134      10.734  13.586  34.341  1.00 47.10           C
ATOM   1063  C   GLY A 134      11.783  14.636  34.106  1.00 47.10           C
ATOM   1064  O   GLY A 134      12.978  14.360  34.199  1.00 47.10           O
ATOM   1065  N   MET A 135      11.359  15.873  33.783  1.00 81.37           N
ATOM   1066  CA  MET A 135      12.252  16.949  33.444  1.00 81.37           C
ATOM   1067  CB  MET A 135      11.505  18.277  33.212  1.00 81.37           C
ATOM   1068  CG  MET A 135      12.406  19.501  32.999  1.00 81.37           C
ATOM   1069  SD  MET A 135      13.243  19.612  31.388  1.00 81.37           S
ATOM   1070  CE  MET A 135      11.745  20.026  30.448  1.00 81.37           C
ATOM   1071  C   MET A 135      13.235  17.171  34.561  1.00 81.37           C
ATOM   1072  O   MET A 135      14.371  17.573  34.318  1.00 81.37           O
ATOM   1073  N   LYS A 136      12.799  17.004  35.818  1.00192.76           N
ATOM   1074  CA  LYS A 136      13.591  17.212  37.004  1.00192.76           C
ATOM   1075  CB  LYS A 136      12.724  17.539  38.231  1.00192.76           C
ATOM   1076  CG  LYS A 136      11.775  18.709  37.955  1.00192.76           C
ATOM   1077  CD  LYS A 136      12.462  19.907  37.294  1.00192.76           C
ATOM   1078  CE  LYS A 136      13.670  20.434  38.067  1.00192.76           C
ATOM   1079  NZ  LYS A 136      14.494  21.297  37.189  1.00192.76           N
ATOM   1080  C   LYS A 136      14.543  16.093  37.361  1.00192.76           C
ATOM   1081  O   LYS A 136      15.449  16.307  38.164  1.00192.76           O
ATOM   1082  N   PHE A 137      14.355  14.869  36.825  1.00 90.14           N
ATOM   1083  CA  PHE A 137      15.056  13.693  37.291  1.00 90.14           C
ATOM   1084  CB  PHE A 137      14.678  12.413  36.525  1.00 90.14           C
ATOM   1085  CG  PHE A 137      15.359  11.277  37.215  1.00 90.14           C
ATOM   1086  CD1 PHE A 137      14.833  10.771  38.381  1.00 90.14           C
ATOM   1087  CD2 PHE A 137      16.506  10.711  36.707  1.00 90.14           C
ATOM   1088  CE1 PHE A 137      15.440   9.725  39.034  1.00 90.14           C
ATOM   1089  CE2 PHE A 137      17.118   9.663  37.357  1.00 90.14           C
ATOM   1090  CZ  PHE A 137      16.587   9.169  38.523  1.00 90.14           C
ATOM   1091  C   PHE A 137      16.553  13.813  37.218  1.00 90.14           C
ATOM   1092  O   PHE A 137      17.220  13.457  38.192  1.00 90.14           O
ATOM   1093  N   PRO A 138      17.152  14.265  36.151  1.00 82.77           N
ATOM   1094  CA  PRO A 138      18.588  14.337  36.127  1.00 82.77           C
ATOM   1095  CD  PRO A 138      16.576  14.173  34.819  1.00 82.77           C
ATOM   1096  CB  PRO A 138      18.940  14.779  34.707  1.00 82.77           C
ATOM   1097  CG  PRO A 138      17.779  14.220  33.858  1.00 82.77           C
ATOM   1098  C   PRO A 138      19.098  15.242  37.208  1.00 82.77           C
ATOM   1099  O   PRO A 138      20.114  14.925  37.825  1.00 82.77           O
ATOM   1100  N   ASP A 139      18.399  16.364  37.464  1.00 75.27           N
ATOM   1101  CA  ASP A 139      18.818  17.322  38.450  1.00 75.27           C
ATOM   1102  CB  ASP A 139      17.907  18.562  38.487  1.00 75.27           C
ATOM   1103  CG  ASP A 139      18.005  19.282  37.148  1.00 75.27           C
ATOM   1104  OD1 ASP A 139      19.145  19.462  36.640  1.00 75.27           O
ATOM   1105  OD2 ASP A 139      16.931  19.672  36.619  1.00 75.27           O
ATOM   1106  C   ASP A 139      18.774  16.703  39.815  1.00 75.27           C
ATOM   1107  O   ASP A 139      19.704  16.847  40.609  1.00 75.27           O
ATOM   1108  N   MET A 140      17.685  15.977  40.120  1.00 67.59           N
ATOM   1109  CA  MET A 140      17.524  15.397  41.422  1.00 67.59           C
ATOM   1110  CB  MET A 140      16.223  14.591  41.522  1.00 67.59           C
ATOM   1111  CG  MET A 140      16.031  13.890  42.864  1.00 67.59           C
ATOM   1112  SD  MET A 140      14.582  12.801  42.913  1.00 67.59           S
ATOM   1113  CE  MET A 140      15.256  11.624  41.707  1.00 67.59           C
ATOM   1114  C   MET A 140      18.640  14.434  41.673  1.00 67.59           C
ATOM   1115  O   MET A 140      19.287  14.480  42.718  1.00 67.59           O
ATOM   1116  N   VAL A 141      18.910  13.556  40.689  1.00115.88           N
ATOM   1117  CA  VAL A 141      19.893  12.524  40.836  1.00115.88           C
ATOM   1118  CB  VAL A 141      19.871  11.559  39.676  1.00115.88           C
ATOM   1119  CG1 VAL A 141      20.601  12.162  38.469  1.00115.88           C
ATOM   1120  CG2 VAL A 141      20.400  10.202  40.146  1.00115.88           C
ATOM   1121  C   VAL A 141      21.248  13.143  40.982  1.00115.88           C
ATOM   1122  O   VAL A 141      22.044  12.715  41.815  1.00115.88           O
ATOM   1123  N   HIS A 142      21.539  14.194  40.192  1.00 52.88           N
ATOM   1124  CA  HIS A 142      22.824  14.829  40.254  1.00 52.88           C
ATOM   1125  ND1 HIS A 142      23.173  16.181  36.687  1.00 52.88           N
ATOM   1126  CG  HIS A 142      23.143  15.403  37.822  1.00 52.88           C
ATOM   1127  CB  HIS A 142      23.005  15.946  39.214  1.00 52.88           C
ATOM   1128  NE2 HIS A 142      23.389  14.069  36.018  1.00 52.88           N
ATOM   1129  CD2 HIS A 142      23.275  14.117  37.397  1.00 52.88           C
ATOM   1130  CE1 HIS A 142      23.321  15.331  35.638  1.00 52.88           C
ATOM   1131  C   HIS A 142      23.024  15.402  41.623  1.00 52.88           C
ATOM   1132  O   HIS A 142      24.137  15.388  42.145  1.00 52.88           O
ATOM   1133  N   ALA A 143      21.958  15.955  42.226  1.00 45.57           N
ATOM   1134  CA  ALA A 143      22.036  16.525  43.547  1.00 45.57           C
ATOM   1135  CB  ALA A 143      20.742  17.239  43.972  1.00 45.57           C
ATOM   1136  C   ALA A 143      22.316  15.457  44.569  1.00 45.57           C
ATOM   1137  O   ALA A 143      23.009  15.703  45.556  1.00 45.57           O
ATOM   1138  N   LEU A 144      21.692  14.275  44.392  1.00 79.84           N
ATOM   1139  CA  LEU A 144      21.807  13.134  45.262  1.00 79.84           C
ATOM   1140  CB  LEU A 144      20.739  12.069  44.950  1.00 79.84           C
ATOM   1141  CG  LEU A 144      19.303  12.514  45.274  1.00 79.84           C
ATOM   1142  CD1 LEU A 144      18.278  11.448  44.857  1.00 79.84           C
ATOM   1143  CD2 LEU A 144      19.168  12.894  46.756  1.00 79.84           C
ATOM   1144  C   LEU A 144      23.139  12.463  45.144  1.00 79.84           C
ATOM   1145  O   LEU A 144      23.712  12.020  46.139  1.00 79.84           O
ATOM   1146  N   LYS A 145      23.663  12.364  43.910  1.00 69.39           N
ATOM   1147  CA  LYS A 145      24.873  11.630  43.685  1.00 69.39           C
ATOM   1148  CB  LYS A 145      25.250  11.488  42.202  1.00 69.39           C
ATOM   1149  CG  LYS A 145      24.271  10.606  41.425  1.00 69.39           C
ATOM   1150  CD  LYS A 145      24.491  10.627  39.915  1.00 69.39           C
ATOM   1151  CE  LYS A 145      23.612   9.630  39.158  1.00 69.39           C
ATOM   1152  NZ  LYS A 145      23.970   9.637  37.722  1.00 69.39           N
ATOM   1153  C   LYS A 145      26.005  12.284  44.399  1.00 69.39           C
ATOM   1154  O   LYS A 145      25.921  13.426  44.847  1.00 69.39           O
ATOM   1155  N   PRO A 146      27.080  11.552  44.519  1.00 82.73           N
ATOM   1156  CA  PRO A 146      28.216  12.083  45.206  1.00 82.73           C
ATOM   1157  CD  PRO A 146      27.015  10.102  44.610  1.00 82.73           C
ATOM   1158  CB  PRO A 146      29.209  10.930  45.299  1.00 82.73           C
ATOM   1159  CG  PRO A 146      28.290   9.690  45.371  1.00 82.73           C
ATOM   1160  C   PRO A 146      28.675  13.328  44.522  1.00 82.73           C
ATOM   1161  O   PRO A 146      28.505  13.452  43.309  1.00 82.73           O
ATOM   1162  N   ASN A 147      29.217  14.285  45.296  1.00 56.79           N
ATOM   1163  CA  ASN A 147      29.658  15.531  44.745  1.00 56.79           C
ATOM   1164  CB  ASN A 147      30.331  16.435  45.796  1.00 56.79           C
ATOM   1165  CG  ASN A 147      30.722  17.744  45.132  1.00 56.79           C
ATOM   1166  OD1 ASN A 147      31.763  17.838  44.485  1.00 56.79           O
ATOM   1167  ND2 ASN A 147      29.858  18.783  45.286  1.00 56.79           N
ATOM   1168  C   ASN A 147      30.646  15.220  43.665  1.00 56.79           C
ATOM   1169  O   ASN A 147      31.533  14.387  43.833  1.00 56.79           O
ATOM   1170  N   PRO A 148      30.500  15.867  42.542  1.00 89.70           N
ATOM   1171  CA  PRO A 148      31.316  15.648  41.376  1.00 89.70           C
ATOM   1172  CD  PRO A 148      29.555  16.959  42.382  1.00 89.70           C
ATOM   1173  CB  PRO A 148      30.717  16.554  40.296  1.00 89.70           C
ATOM   1174  CG  PRO A 148      29.993  17.662  41.087  1.00 89.70           C
ATOM   1175  C   PRO A 148      32.784  15.888  41.607  1.00 89.70           C
ATOM   1176  O   PRO A 148      33.583  15.354  40.834  1.00 89.70           O
ATOM   1177  N   LYS A 149      33.167  16.796  42.530  1.00102.99           N
ATOM   1178  CA  LYS A 149      34.562  16.971  42.849  1.00102.99           C
ATOM   1179  CB  LYS A 149      34.863  18.356  43.441  1.00102.99           C
ATOM   1180  CG  LYS A 149      36.352  18.602  43.697  1.00102.99           C
ATOM   1181  CD  LYS A 149      36.676  20.076  43.938  1.00102.99           C
ATOM   1182  CE  LYS A 149      35.850  20.695  45.066  1.00102.99           C
ATOM   1183  NZ  LYS A 149      36.158  22.137  45.182  1.00102.99           N
ATOM   1184  C   LYS A 149      35.068  15.950  43.843  1.00102.99           C
ATOM   1185  O   LYS A 149      36.088  15.299  43.627  1.00102.99           O
ATOM   1186  N   ASN A 150      34.353  15.824  44.983  1.00102.96           N
ATOM   1187  CA  ASN A 150      34.698  15.029  46.141  1.00102.96           C
ATOM   1188  CB  ASN A 150      33.873  15.454  47.375  1.00102.96           C
ATOM   1189  CG  ASN A 150      34.497  14.886  48.645  1.00102.96           C
ATOM   1190  OD1 ASN A 150      35.433  14.090  48.601  1.00102.96           O
ATOM   1191  ND2 ASN A 150      33.958  15.309  49.821  1.00102.96           N
ATOM   1192  C   ASN A 150      34.474  13.556  45.933  1.00102.96           C
ATOM   1193  O   ASN A 150      35.195  12.722  46.480  1.00102.96           O
ATOM   1194  N   HIS A 151      33.464  13.199  45.125  1.00101.62           N
ATOM   1195  CA  HIS A 151      33.036  11.842  44.926  1.00101.62           C
ATOM   1196  ND1 HIS A 151      33.423   9.425  42.551  1.00101.62           N
ATOM   1197  CG  HIS A 151      33.690   9.605  43.889  1.00101.62           C
ATOM   1198  CB  HIS A 151      34.175  10.903  44.472  1.00101.62           C
ATOM   1199  NE2 HIS A 151      32.981   7.488  43.550  1.00101.62           N
ATOM   1200  CD2 HIS A 151      33.416   8.412  44.485  1.00101.62           C
ATOM   1201  CE1 HIS A 151      33.003   8.142  42.404  1.00101.62           C
ATOM   1202  C   HIS A 151      32.461  11.319  46.213  1.00101.62           C
ATOM   1203  O   HIS A 151      32.509  10.121  46.486  1.00101.62           O
ATOM   1204  N   ILE A 152      31.873  12.215  47.039  1.00 49.14           N
ATOM   1205  CA  ILE A 152      31.240  11.804  48.262  1.00 49.14           C
ATOM   1206  CB  ILE A 152      32.032  12.156  49.492  1.00 49.14           C
ATOM   1207  CG1 ILE A 152      33.372  11.395  49.476  1.00 49.14           C
ATOM   1208  CG2 ILE A 152      31.177  11.854  50.734  1.00 49.14           C
ATOM   1209  CD1 ILE A 152      34.319  11.776  50.612  1.00 49.14           C
ATOM   1210  C   ILE A 152      29.898  12.474  48.318  1.00 49.14           C
ATOM   1211  O   ILE A 152      29.742  13.614  47.884  1.00 49.14           O
ATOM   1212  N   GLN A 153      28.882  11.767  48.852  1.00 56.33           N
ATOM   1213  CA  GLN A 153      27.533  12.266  48.902  1.00 56.33           C
ATOM   1214  CB  GLN A 153      26.563  11.158  49.355  1.00 56.33           C
ATOM   1215  CG  GLN A 153      25.079  11.521  49.353  1.00 56.33           C
ATOM   1216  CD  GLN A 153      24.331  10.279  49.821  1.00 56.33           C
ATOM   1217  OE1 GLN A 153      24.482   9.840  50.959  1.00 56.33           O
ATOM   1218  NE2 GLN A 153      23.507   9.690  48.911  1.00 56.33           N
ATOM   1219  C   GLN A 153      27.492  13.401  49.879  1.00 56.33           C
ATOM   1220  O   GLN A 153      28.038  13.299  50.975  1.00 56.33           O
ATOM   1221  N   GLU A 154      26.842  14.526  49.501  1.00111.83           N
ATOM   1222  CA  GLU A 154      26.832  15.656  50.387  1.00111.83           C
ATOM   1223  CB  GLU A 154      27.589  16.863  49.820  1.00111.83           C
ATOM   1224  CG  GLU A 154      28.305  17.696  50.880  1.00111.83           C
ATOM   1225  CD  GLU A 154      29.778  17.342  50.742  1.00111.83           C
ATOM   1226  OE1 GLU A 154      30.267  17.366  49.580  1.00111.83           O
ATOM   1227  OE2 GLU A 154      30.433  17.045  51.775  1.00111.83           O
ATOM   1228  C   GLU A 154      25.412  16.108  50.547  1.00111.83           C
ATOM   1229  O   GLU A 154      24.728  16.448  49.584  1.00111.83           O
ATOM   1230  N   ASN A 155      24.960  16.164  51.805  1.00 95.70           N
ATOM   1231  CA  ASN A 155      23.633  16.527  52.201  1.00 95.70           C
ATOM   1232  CB  ASN A 155      23.509  16.337  53.721  1.00 95.70           C
ATOM   1233  CG  ASN A 155      22.105  16.662  54.162  1.00 95.70           C
ATOM   1234  OD1 ASN A 155      21.714  17.823  54.155  1.00 95.70           O
ATOM   1235  ND2 ASN A 155      21.324  15.626  54.570  1.00 95.70           N
ATOM   1236  C   ASN A 155      23.384  17.961  51.839  1.00 95.70           C
ATOM   1237  O   ASN A 155      22.262  18.346  51.505  1.00 95.70           O
ATOM   1238  N   TRP A 156      24.434  18.798  51.887  1.00159.62           N
ATOM   1239  CA  TRP A 156      24.224  20.181  51.594  1.00159.62           C
ATOM   1240  CB  TRP A 156      25.467  21.081  51.791  1.00159.62           C
ATOM   1241  CG  TRP A 156      26.638  20.927  50.846  1.00159.62           C
ATOM   1242  CD2 TRP A 156      27.769  21.803  50.876  1.00159.62           C
ATOM   1243  CD1 TRP A 156      26.870  20.039  49.841  1.00159.62           C
ATOM   1244  NE1 TRP A 156      28.077  20.304  49.241  1.00159.62           N
ATOM   1245  CE2 TRP A 156      28.641  21.389  49.869  1.00159.62           C
ATOM   1246  CE3 TRP A 156      28.057  22.871  51.675  1.00159.62           C
ATOM   1247  CZ2 TRP A 156      29.819  22.042  49.647  1.00159.62           C
ATOM   1248  CZ3 TRP A 156      29.248  23.523  51.455  1.00159.62           C
ATOM   1249  CH2 TRP A 156      30.114  23.117  50.459  1.00159.62           C
ATOM   1250  C   TRP A 156      23.719  20.312  50.182  1.00159.62           C
ATOM   1251  O   TRP A 156      22.950  21.223  49.885  1.00159.62           O
ATOM   1252  N   ARG A 157      24.192  19.449  49.261  1.00158.64           N
ATOM   1253  CA  ARG A 157      23.801  19.482  47.871  1.00158.64           C
ATOM   1254  CB  ARG A 157      24.683  18.576  46.998  1.00158.64           C
ATOM   1255  CG  ARG A 157      26.131  19.056  46.912  1.00158.64           C
ATOM   1256  CD  ARG A 157      27.018  18.160  46.048  1.00158.64           C
ATOM   1257  NE  ARG A 157      26.324  17.966  44.744  1.00158.64           N
ATOM   1258  CZ  ARG A 157      26.446  18.898  43.755  1.00158.64           C
ATOM   1259  NH1 ARG A 157      27.175  20.030  43.976  1.00158.64           N
ATOM   1260  NH2 ARG A 157      25.840  18.700  42.547  1.00158.64           N
ATOM   1261  C   ARG A 157      22.374  19.050  47.645  1.00158.64           C
ATOM   1262  O   ARG A 157      21.624  19.718  46.936  1.00158.64           O
ATOM   1263  N   ILE A 158      21.977  17.910  48.250  1.00138.02           N
ATOM   1264  CA  ILE A 158      20.687  17.266  48.112  1.00138.02           C
ATOM   1265  CB  ILE A 158      20.506  16.150  49.104  1.00138.02           C
ATOM   1266  CG1 ILE A 158      21.653  15.141  49.152  1.00138.02           C
ATOM   1267  CG2 ILE A 158      19.147  15.507  48.791  1.00138.02           C
ATOM   1268  CD1 ILE A 158      21.657  14.192  47.976  1.00138.02           C
ATOM   1269  C   ILE A 158      19.616  18.159  48.660  1.00138.02           C
ATOM   1270  O   ILE A 158      18.556  18.339  48.061  1.00138.02           O
ATOM   1271  N   MET A 159      19.874  18.695  49.868  1.00 61.73           N
ATOM   1272  CA  MET A 159      18.915  19.480  50.596  1.00 61.73           C
ATOM   1273  CB  MET A 159      19.406  19.989  51.960  1.00 61.73           C
ATOM   1274  CG  MET A 159      19.487  18.927  53.050  1.00 61.73           C
ATOM   1275  SD  MET A 159      17.902  18.303  53.680  1.00 61.73           S
ATOM   1276  CE  MET A 159      17.533  17.305  52.210  1.00 61.73           C
ATOM   1277  C   MET A 159      18.619  20.714  49.821  1.00 61.73           C
ATOM   1278  O   MET A 159      17.510  21.238  49.899  1.00 61.73           O
ATOM   1279  N   ASP A 160      19.634  21.250  49.115  1.00 72.62           N
ATOM   1280  CA  ASP A 160      19.420  22.441  48.339  1.00 72.62           C
ATOM   1281  CB  ASP A 160      20.684  22.926  47.603  1.00 72.62           C
ATOM   1282  CG  ASP A 160      20.447  24.337  47.067  1.00 72.62           C
ATOM   1283  OD1 ASP A 160      19.811  25.153  47.790  1.00 72.62           O
ATOM   1284  OD2 ASP A 160      20.896  24.618  45.925  1.00 72.62           O
ATOM   1285  C   ASP A 160      18.380  22.169  47.289  1.00 72.62           C
ATOM   1286  O   ASP A 160      17.385  22.887  47.192  1.00 72.62           O
ATOM   1287  N   PHE A 161      18.559  21.088  46.501  1.00 91.16           N
ATOM   1288  CA  PHE A 161      17.646  20.768  45.440  1.00 91.16           C
ATOM   1289  CB  PHE A 161      18.126  19.542  44.633  1.00 91.16           C
ATOM   1290  CG  PHE A 161      17.088  19.128  43.645  1.00 91.16           C
ATOM   1291  CD1 PHE A 161      16.967  19.756  42.427  1.00 91.16           C
ATOM   1292  CD2 PHE A 161      16.226  18.101  43.949  1.00 91.16           C
ATOM   1293  CE1 PHE A 161      16.005  19.363  41.526  1.00 91.16           C
ATOM   1294  CE2 PHE A 161      15.261  17.700  43.052  1.00 91.16           C
ATOM   1295  CZ  PHE A 161      15.150  18.332  41.837  1.00 91.16           C
ATOM   1296  C   PHE A 161      16.285  20.494  46.010  1.00 91.16           C
ATOM   1297  O   PHE A 161      15.288  21.028  45.526  1.00 91.16           O
ATOM   1298  N   PHE A 162      16.207  19.673  47.074  1.00124.04           N
ATOM   1299  CA  PHE A 162      14.933  19.279  47.608  1.00124.04           C
ATOM   1300  CB  PHE A 162      15.016  18.052  48.529  1.00124.04           C
ATOM   1301  CG  PHE A 162      15.270  16.912  47.593  1.00124.04           C
ATOM   1302  CD1 PHE A 162      14.216  16.239  47.014  1.00124.04           C
ATOM   1303  CD2 PHE A 162      16.551  16.530  47.265  1.00124.04           C
ATOM   1304  CE1 PHE A 162      14.427  15.191  46.149  1.00124.04           C
ATOM   1305  CE2 PHE A 162      16.772  15.483  46.397  1.00124.04           C
ATOM   1306  CZ  PHE A 162      15.711  14.808  45.840  1.00124.04           C
ATOM   1307  C   PHE A 162      14.159  20.401  48.245  1.00124.04           C
ATOM   1308  O   PHE A 162      12.948  20.495  48.049  1.00124.04           O
ATOM   1309  N   SER A 163      14.808  21.287  49.026  1.00 38.78           N
ATOM   1310  CA  SER A 163      14.073  22.355  49.650  1.00 38.78           C
ATOM   1311  CB  SER A 163      14.938  23.183  50.618  1.00 38.78           C
ATOM   1312  OG  SER A 163      16.075  23.702  49.944  1.00 38.78           O
ATOM   1313  C   SER A 163      13.506  23.257  48.589  1.00 38.78           C
ATOM   1314  O   SER A 163      12.419  23.811  48.750  1.00 38.78           O
ATOM   1315  N   HIS A 164      14.244  23.438  47.476  1.00 75.28           N
ATOM   1316  CA  HIS A 164      13.853  24.252  46.354  1.00 75.28           C
ATOM   1317  ND1 HIS A 164      15.691  27.001  45.376  1.00 75.28           N
ATOM   1318  CG  HIS A 164      15.855  25.714  45.841  1.00 75.28           C
ATOM   1319  CB  HIS A 164      15.007  24.560  45.385  1.00 75.28           C
ATOM   1320  NE2 HIS A 164      17.357  27.067  46.845  1.00 75.28           N
ATOM   1321  CD2 HIS A 164      16.876  25.772  46.738  1.00 75.28           C
ATOM   1322  CE1 HIS A 164      16.614  27.768  46.009  1.00 75.28           C
ATOM   1323  C   HIS A 164      12.727  23.620  45.590  1.00 75.28           C
ATOM   1324  O   HIS A 164      11.986  24.323  44.905  1.00 75.28           O
ATOM   1325  N   HIS A 165      12.631  22.273  45.602  1.00 90.99           N
ATOM   1326  CA  HIS A 165      11.523  21.586  44.988  1.00 90.99           C
ATOM   1327  ND1 HIS A 165      11.118  20.948  41.754  1.00 90.99           N
ATOM   1328  CG  HIS A 165      12.150  20.801  42.655  1.00 90.99           C
ATOM   1329  CB  HIS A 165      11.926  20.410  44.083  1.00 90.99           C
ATOM   1330  NE2 HIS A 165      12.995  21.368  40.647  1.00 90.99           N
ATOM   1331  CD2 HIS A 165      13.290  21.062  41.962  1.00 90.99           C
ATOM   1332  CE1 HIS A 165      11.679  21.287  40.568  1.00 90.99           C
ATOM   1333  C   HIS A 165      10.712  21.001  46.106  1.00 90.99           C
ATOM   1334  O   HIS A 165      10.856  19.828  46.451  1.00 90.99           O
ATOM   1335  N   PRO A 166       9.800  21.785  46.614  1.00178.16           N
ATOM   1336  CA  PRO A 166       9.043  21.458  47.796  1.00178.16           C
ATOM   1337  CD  PRO A 166       9.811  23.215  46.347  1.00178.16           C
ATOM   1338  CB  PRO A 166       8.279  22.728  48.164  1.00178.16           C
ATOM   1339  CG  PRO A 166       9.123  23.860  47.559  1.00178.16           C
ATOM   1340  C   PRO A 166       8.143  20.264  47.681  1.00178.16           C
ATOM   1341  O   PRO A 166       7.693  19.776  48.717  1.00178.16           O
ATOM   1342  N   GLU A 167       7.850  19.788  46.457  1.00124.92           N
ATOM   1343  CA  GLU A 167       6.983  18.662  46.259  1.00124.92           C
ATOM   1344  CB  GLU A 167       6.722  18.319  44.780  1.00124.92           C
ATOM   1345  CG  GLU A 167       7.928  17.754  44.022  1.00124.92           C
ATOM   1346  CD  GLU A 167       8.718  18.900  43.412  1.00124.92           C
ATOM   1347  OE1 GLU A 167       8.554  20.056  43.884  1.00124.92           O
ATOM   1348  OE2 GLU A 167       9.494  18.631  42.457  1.00124.92           O
ATOM   1349  C   GLU A 167       7.621  17.459  46.893  1.00124.92           C
ATOM   1350  O   GLU A 167       6.962  16.455  47.152  1.00124.92           O
ATOM   1351  N   SER A 168       8.947  17.523  47.096  1.00110.80           N
ATOM   1352  CA  SER A 168       9.753  16.462  47.637  1.00110.80           C
ATOM   1353  CB  SER A 168      11.249  16.791  47.572  1.00110.80           C
ATOM   1354  OG  SER A 168      11.626  17.026  46.227  1.00110.80           O
ATOM   1355  C   SER A 168       9.450  16.203  49.087  1.00110.80           C
ATOM   1356  O   SER A 168       9.942  15.225  49.651  1.00110.80           O
ATOM   1357  N   LEU A 169       8.635  17.051  49.741  1.00 65.38           N
ATOM   1358  CA  LEU A 169       8.433  16.925  51.164  1.00 65.38           C
ATOM   1359  CB  LEU A 169       7.484  17.997  51.732  1.00 65.38           C
ATOM   1360  CG  LEU A 169       7.180  17.831  53.235  1.00 65.38           C
ATOM   1361  CD1 LEU A 169       8.460  17.866  54.085  1.00 65.38           C
ATOM   1362  CD2 LEU A 169       6.137  18.858  53.704  1.00 65.38           C
ATOM   1363  C   LEU A 169       7.876  15.578  51.539  1.00 65.38           C
ATOM   1364  O   LEU A 169       8.377  14.936  52.460  1.00 65.38           O
ATOM   1365  N   HIS A 170       6.852  15.089  50.822  1.00 81.80           N
ATOM   1366  CA  HIS A 170       6.208  13.844  51.156  1.00 81.80           C
ATOM   1367  ND1 HIS A 170       3.142  12.551  51.564  1.00 81.80           N
ATOM   1368  CG  HIS A 170       4.172  12.398  50.664  1.00 81.80           C
ATOM   1369  CB  HIS A 170       5.049  13.519  50.194  1.00 81.80           C
ATOM   1370  NE2 HIS A 170       3.182  10.399  51.004  1.00 81.80           N
ATOM   1371  CD2 HIS A 170       4.183  11.078  50.331  1.00 81.80           C
ATOM   1372  CE1 HIS A 170       2.584  11.325  51.732  1.00 81.80           C
ATOM   1373  C   HIS A 170       7.191  12.702  51.104  1.00 81.80           C
ATOM   1374  O   HIS A 170       7.163  11.825  51.965  1.00 81.80           O
ATOM   1375  N   MET A 171       8.075  12.658  50.089  1.00 60.10           N
ATOM   1376  CA  MET A 171       9.041  11.594  49.969  1.00 60.10           C
ATOM   1377  CB  MET A 171       9.848  11.690  48.667  1.00 60.10           C
ATOM   1378  CG  MET A 171      10.755  10.483  48.449  1.00 60.10           C
ATOM   1379  SD  MET A 171       9.835   8.928  48.271  1.00 60.10           S
ATOM   1380  CE  MET A 171      11.215   8.023  47.517  1.00 60.10           C
ATOM   1381  C   MET A 171       9.996  11.660  51.125  1.00 60.10           C
ATOM   1382  O   MET A 171      10.381  10.643  51.706  1.00 60.10           O
ATOM   1383  N   PHE A 172      10.379  12.888  51.509  1.00112.93           N
ATOM   1384  CA  PHE A 172      11.290  13.091  52.594  1.00112.93           C
ATOM   1385  CB  PHE A 172      11.587  14.582  52.832  1.00112.93           C
ATOM   1386  CG  PHE A 172      12.706  14.954  51.919  1.00112.93           C
ATOM   1387  CD1 PHE A 172      12.529  15.014  50.558  1.00112.93           C
ATOM   1388  CD2 PHE A 172      13.958  15.199  52.437  1.00112.93           C
ATOM   1389  CE1 PHE A 172      13.583  15.346  49.742  1.00112.93           C
ATOM   1390  CE2 PHE A 172      15.014  15.533  51.622  1.00112.93           C
ATOM   1391  CZ  PHE A 172      14.826  15.611  50.266  1.00112.93           C
ATOM   1392  C   PHE A 172      10.700  12.482  53.829  1.00112.93           C
ATOM   1393  O   PHE A 172      11.420  11.890  54.630  1.00112.93           O
ATOM   1394  N   THR A 173       9.372  12.593  54.023  1.00133.64           N
ATOM   1395  CA  THR A 173       8.798  12.041  55.216  1.00133.64           C
ATOM   1396  CB  THR A 173       7.349  12.382  55.450  1.00133.64           C
ATOM   1397  OG1 THR A 173       6.509  11.838  54.447  1.00133.64           O
ATOM   1398  CG2 THR A 173       7.223  13.916  55.485  1.00133.64           C
ATOM   1399  C   THR A 173       8.999  10.547  55.264  1.00133.64           C
ATOM   1400  O   THR A 173       9.155  10.002  56.353  1.00133.64           O
ATOM   1401  N   PHE A 174       8.923   9.830  54.119  1.00123.54           N
ATOM   1402  CA  PHE A 174       9.161   8.400  54.064  1.00123.54           C
ATOM   1403  CB  PHE A 174       8.665   7.728  52.770  1.00123.54           C
ATOM   1404  CG  PHE A 174       7.204   7.467  52.878  1.00123.54           C
ATOM   1405  CD1 PHE A 174       6.772   6.297  53.457  1.00123.54           C
ATOM   1406  CD2 PHE A 174       6.274   8.366  52.408  1.00123.54           C
ATOM   1407  CE1 PHE A 174       5.432   6.019  53.569  1.00123.54           C
ATOM   1408  CE2 PHE A 174       4.931   8.091  52.518  1.00123.54           C
ATOM   1409  CZ  PHE A 174       4.509   6.919  53.098  1.00123.54           C
ATOM   1410  C   PHE A 174      10.614   7.992  54.174  1.00123.54           C
ATOM   1411  O   PHE A 174      10.960   7.044  54.877  1.00123.54           O
ATOM   1412  N   LEU A 175      11.511   8.685  53.453  1.00 78.87           N
ATOM   1413  CA  LEU A 175      12.888   8.283  53.306  1.00 78.87           C
ATOM   1414  CB  LEU A 175      13.601   9.223  52.306  1.00 78.87           C
ATOM   1415  CG  LEU A 175      14.964   8.765  51.742  1.00 78.87           C
ATOM   1416  CD1 LEU A 175      15.559   9.848  50.830  1.00 78.87           C
ATOM   1417  CD2 LEU A 175      15.950   8.307  52.824  1.00 78.87           C
ATOM   1418  C   LEU A 175      13.600   8.351  54.630  1.00 78.87           C
ATOM   1419  O   LEU A 175      14.427   7.497  54.949  1.00 78.87           O
ATOM   1420  N   PHE A 176      13.303   9.397  55.421  1.00181.25           N
ATOM   1421  CA  PHE A 176      13.910   9.659  56.702  1.00181.25           C
ATOM   1422  CB  PHE A 176      13.879  11.115  57.194  1.00181.25           C
ATOM   1423  CG  PHE A 176      14.959  11.833  56.457  1.00181.25           C
ATOM   1424  CD1 PHE A 176      16.276  11.679  56.834  1.00181.25           C
ATOM   1425  CD2 PHE A 176      14.667  12.636  55.382  1.00181.25           C
ATOM   1426  CE1 PHE A 176      17.284  12.331  56.162  1.00181.25           C
ATOM   1427  CE2 PHE A 176      15.670  13.291  54.706  1.00181.25           C
ATOM   1428  CZ  PHE A 176      16.981  13.141  55.095  1.00181.25           C
ATOM   1429  C   PHE A 176      13.443   8.769  57.808  1.00181.25           C
ATOM   1430  O   PHE A 176      14.017   8.821  58.897  1.00181.25           O
ATOM   1431  N   ASP A 177      12.308   8.057  57.659  1.00 82.52           N
ATOM   1432  CA  ASP A 177      12.071   7.143  58.737  1.00 82.52           C
ATOM   1433  CB  ASP A 177      10.611   6.698  59.002  1.00 82.52           C
ATOM   1434  CG  ASP A 177       9.984   5.961  57.838  1.00 82.52           C
ATOM   1435  OD1 ASP A 177       9.501   6.643  56.897  1.00 82.52           O
ATOM   1436  OD2 ASP A 177       9.953   4.703  57.892  1.00 82.52           O
ATOM   1437  C   ASP A 177      13.001   5.977  58.537  1.00 82.52           C
ATOM   1438  O   ASP A 177      13.901   6.040  57.702  1.00 82.52           O
ATOM   1439  N   ASP A 178      12.851   4.910  59.345  1.00 61.09           N
ATOM   1440  CA  ASP A 178      13.715   3.755  59.322  1.00 61.09           C
ATOM   1441  CB  ASP A 178      13.408   2.763  60.457  1.00 61.09           C
ATOM   1442  CG  ASP A 178      13.859   3.378  61.777  1.00 61.09           C
ATOM   1443  OD1 ASP A 178      14.571   4.416  61.737  1.00 61.09           O
ATOM   1444  OD2 ASP A 178      13.496   2.813  62.844  1.00 61.09           O
ATOM   1445  C   ASP A 178      13.565   3.021  58.020  1.00 61.09           C
ATOM   1446  O   ASP A 178      14.457   2.279  57.609  1.00 61.09           O
ATOM   1447  N   ILE A 179      12.416   3.206  57.347  1.00163.08           N
ATOM   1448  CA  ILE A 179      12.103   2.551  56.106  1.00163.08           C
ATOM   1449  CB  ILE A 179      10.736   2.847  55.562  1.00163.08           C
ATOM   1450  CG1 ILE A 179      10.461   1.946  54.344  1.00163.08           C
ATOM   1451  CG2 ILE A 179      10.634   4.349  55.267  1.00163.08           C
ATOM   1452  CD1 ILE A 179      10.407   0.457  54.688  1.00163.08           C
ATOM   1453  C   ILE A 179      13.141   2.890  55.081  1.00163.08           C
ATOM   1454  O   ILE A 179      13.243   2.239  54.043  1.00163.08           O
ATOM   1455  N   GLY A 180      13.871   3.992  55.306  1.00 55.17           N
ATOM   1456  CA  GLY A 180      14.938   4.407  54.441  1.00 55.17           C
ATOM   1457  C   GLY A 180      15.975   3.318  54.348  1.00 55.17           C
ATOM   1458  O   GLY A 180      16.664   3.222  53.334  1.00 55.17           O
ATOM   1459  N   VAL A 181      16.206   2.523  55.418  1.00132.90           N
ATOM   1460  CA  VAL A 181      17.143   1.445  55.230  1.00132.90           C
ATOM   1461  CB  VAL A 181      18.445   1.627  55.968  1.00132.90           C
ATOM   1462  CG1 VAL A 181      18.187   1.739  57.479  1.00132.90           C
ATOM   1463  CG2 VAL A 181      19.384   0.473  55.571  1.00132.90           C
ATOM   1464  C   VAL A 181      16.507   0.129  55.612  1.00132.90           C
ATOM   1465  O   VAL A 181      16.419  -0.231  56.784  1.00132.90           O
ATOM   1466  N   PRO A 182      16.092  -0.626  54.621  1.00 75.95           N
ATOM   1467  CA  PRO A 182      15.492  -1.904  54.896  1.00 75.95           C
ATOM   1468  CD  PRO A 182      15.554  -0.025  53.412  1.00 75.95           C
ATOM   1469  CB  PRO A 182      14.793  -2.322  53.604  1.00 75.95           C
ATOM   1470  CG  PRO A 182      14.454  -0.984  52.926  1.00 75.95           C
ATOM   1471  C   PRO A 182      16.541  -2.867  55.363  1.00 75.95           C
ATOM   1472  O   PRO A 182      17.704  -2.705  54.994  1.00 75.95           O
ATOM   1473  N   ALA A 183      16.162  -3.851  56.205  1.00 45.48           N
ATOM   1474  CA  ALA A 183      17.100  -4.822  56.693  1.00 45.48           C
ATOM   1475  CB  ALA A 183      16.512  -5.754  57.767  1.00 45.48           C
ATOM   1476  C   ALA A 183      17.550  -5.664  55.541  1.00 45.48           C
ATOM   1477  O   ALA A 183      18.712  -6.057  55.470  1.00 45.48           O
ATOM   1478  N   ASP A 184      16.625  -6.007  54.624  1.00139.47           N
ATOM   1479  CA  ASP A 184      17.027  -6.792  53.495  1.00139.47           C
ATOM   1480  CB  ASP A 184      17.137  -8.293  53.846  1.00139.47           C
ATOM   1481  CG  ASP A 184      17.654  -9.099  52.661  1.00139.47           C
ATOM   1482  OD1 ASP A 184      18.426  -8.534  51.839  1.00139.47           O
ATOM   1483  OD2 ASP A 184      17.269 -10.293  52.557  1.00139.47           O
ATOM   1484  C   ASP A 184      15.992  -6.637  52.420  1.00139.47           C
ATOM   1485  O   ASP A 184      14.890  -6.142  52.655  1.00139.47           O
ATOM   1486  N   TYR A 185      16.338  -7.085  51.199  1.00 92.32           N
ATOM   1487  CA  TYR A 185      15.483  -7.012  50.053  1.00 92.32           C
ATOM   1488  CB  TYR A 185      16.114  -7.543  48.755  1.00 92.32           C
ATOM   1489  CG  TYR A 185      17.306  -6.722  48.384  1.00 92.32           C
ATOM   1490  CD1 TYR A 185      17.174  -5.414  47.975  1.00 92.32           C
ATOM   1491  CD2 TYR A 185      18.564  -7.278  48.410  1.00 92.32           C
ATOM   1492  CE1 TYR A 185      18.278  -4.670  47.624  1.00 92.32           C
ATOM   1493  CE2 TYR A 185      19.671  -6.543  48.060  1.00 92.32           C
ATOM   1494  CZ  TYR A 185      19.533  -5.234  47.668  1.00 92.32           C
ATOM   1495  OH  TYR A 185      20.669  -4.478  47.308  1.00 92.32           O
ATOM   1496  C   TYR A 185      14.239  -7.818  50.300  1.00 92.32           C
ATOM   1497  O   TYR A 185      13.169  -7.457  49.819  1.00 92.32           O
ATOM   1498  N   ARG A 186      14.348  -8.973  50.989  1.00160.93           N
ATOM   1499  CA  ARG A 186      13.193  -9.805  51.223  1.00160.93           C
ATOM   1500  CB  ARG A 186      13.502 -11.246  51.666  1.00160.93           C
ATOM   1501  CG  ARG A 186      14.211 -11.370  53.007  1.00160.93           C
ATOM   1502  CD  ARG A 186      14.427 -12.826  53.416  1.00160.93           C
ATOM   1503  NE  ARG A 186      15.106 -12.811  54.739  1.00160.93           N
ATOM   1504  CZ  ARG A 186      14.946 -13.858  55.598  1.00160.93           C
ATOM   1505  NH1 ARG A 186      14.164 -14.920  55.242  1.00160.93           N
ATOM   1506  NH2 ARG A 186      15.569 -13.841  56.811  1.00160.93           N
ATOM   1507  C   ARG A 186      12.260  -9.183  52.228  1.00160.93           C
ATOM   1508  O   ARG A 186      11.081  -9.522  52.270  1.00160.93           O
ATOM   1509  N   HIS A 187      12.811  -8.340  53.118  1.00144.55           N
ATOM   1510  CA  HIS A 187      12.217  -7.620  54.219  1.00144.55           C
ATOM   1511  ND1 HIS A 187      15.306  -8.403  56.108  1.00144.55           N
ATOM   1512  CG  HIS A 187      13.939  -8.302  55.969  1.00144.55           C
ATOM   1513  CB  HIS A 187      13.248  -7.170  55.267  1.00144.55           C
ATOM   1514  NE2 HIS A 187      14.433 -10.171  57.135  1.00144.55           N
ATOM   1515  CD2 HIS A 187      13.422  -9.392  56.601  1.00144.55           C
ATOM   1516  CE1 HIS A 187      15.547  -9.537  56.813  1.00144.55           C
ATOM   1517  C   HIS A 187      11.473  -6.371  53.811  1.00144.55           C
ATOM   1518  O   HIS A 187      11.164  -5.555  54.681  1.00144.55           O
ATOM   1519  N   MET A 188      11.313  -6.076  52.505  1.00120.41           N
ATOM   1520  CA  MET A 188      10.707  -4.815  52.147  1.00120.41           C
ATOM   1521  CB  MET A 188      11.680  -3.890  51.397  1.00120.41           C
ATOM   1522  CG  MET A 188      12.078  -4.436  50.022  1.00120.41           C
ATOM   1523  SD  MET A 188      13.217  -3.378  49.079  1.00120.41           S
ATOM   1524  CE  MET A 188      13.248  -4.443  47.608  1.00120.41           C
ATOM   1525  C   MET A 188       9.517  -5.002  51.240  1.00120.41           C
ATOM   1526  O   MET A 188       9.282  -6.074  50.687  1.00120.41           O
ATOM   1527  N   GLU A 189       8.717  -3.917  51.100  1.00101.02           N
ATOM   1528  CA  GLU A 189       7.522  -3.854  50.297  1.00101.02           C
ATOM   1529  CB  GLU A 189       6.470  -2.896  50.873  1.00101.02           C
ATOM   1530  CG  GLU A 189       6.957  -1.446  50.863  1.00101.02           C
ATOM   1531  CD  GLU A 189       5.961  -0.583  51.622  1.00101.02           C
ATOM   1532  OE1 GLU A 189       5.178  -1.153  52.427  1.00101.02           O
ATOM   1533  OE2 GLU A 189       5.976   0.659  51.414  1.00101.02           O
ATOM   1534  C   GLU A 189       7.870  -3.320  48.937  1.00101.02           C
ATOM   1535  O   GLU A 189       9.020  -2.966  48.676  1.00101.02           O
ATOM   1536  N   GLY A 190       6.869  -3.277  48.023  1.00 34.34           N
ATOM   1537  CA  GLY A 190       7.076  -2.749  46.696  1.00 34.34           C
ATOM   1538  C   GLY A 190       5.904  -1.871  46.341  1.00 34.34           C
ATOM   1539  O   GLY A 190       4.794  -2.079  46.833  1.00 34.34           O
ATOM   1540  N   SER A 191       6.130  -0.854  45.474  1.00 48.39           N
ATOM   1541  CA  SER A 191       5.066   0.037  45.088  1.00 48.39           C
ATOM   1542  CB  SER A 191       5.025   1.322  45.928  1.00 48.39           C
ATOM   1543  OG  SER A 191       4.924   0.990  47.304  1.00 48.39           O
ATOM   1544  C   SER A 191       5.270   0.470  43.663  1.00 48.39           C
ATOM   1545  O   SER A 191       6.389   0.744  43.237  1.00 48.39           O
ATOM   1546  N   GLY A 192       4.175   0.545  42.878  1.00 48.11           N
ATOM   1547  CA  GLY A 192       4.252   1.012  41.517  1.00 48.11           C
ATOM   1548  C   GLY A 192       4.610   2.466  41.540  1.00 48.11           C
ATOM   1549  O   GLY A 192       5.236   2.991  40.621  1.00 48.11           O
ATOM   1550  N   VAL A 193       4.132   3.157  42.587  1.00 96.76           N
ATOM   1551  CA  VAL A 193       4.304   4.564  42.834  1.00 96.76           C
ATOM   1552  CB  VAL A 193       5.715   5.039  42.618  1.00 96.76           C
ATOM   1553  CG1 VAL A 193       5.754   6.567  42.797  1.00 96.76           C
ATOM   1554  CG2 VAL A 193       6.643   4.278  43.581  1.00 96.76           C
ATOM   1555  C   VAL A 193       3.403   5.336  41.908  1.00 96.76           C
ATOM   1556  O   VAL A 193       2.648   6.198  42.357  1.00 96.76           O
ATOM   1557  N   ASN A 194       3.375   4.969  40.611  1.00 67.38           N
ATOM   1558  CA  ASN A 194       2.553   5.663  39.657  1.00 67.38           C
ATOM   1559  CB  ASN A 194       3.176   5.751  38.250  1.00 67.38           C
ATOM   1560  CG  ASN A 194       4.454   6.581  38.295  1.00 67.38           C
ATOM   1561  OD1 ASN A 194       4.506   7.642  38.914  1.00 67.38           O
ATOM   1562  ND2 ASN A 194       5.520   6.080  37.614  1.00 67.38           N
ATOM   1563  C   ASN A 194       1.287   4.890  39.486  1.00 67.38           C
ATOM   1564  O   ASN A 194       1.200   3.713  39.833  1.00 67.38           O
ATOM   1565  N   THR A 195       0.252   5.578  38.972  1.00130.69           N
ATOM   1566  CA  THR A 195      -0.961   4.937  38.576  1.00130.69           C
ATOM   1567  CB  THR A 195      -2.121   5.883  38.483  1.00130.69           C
ATOM   1568  OG1 THR A 195      -1.891   6.821  37.442  1.00130.69           O
ATOM   1569  CG2 THR A 195      -2.267   6.622  39.824  1.00130.69           C
ATOM   1570  C   THR A 195      -0.687   4.468  37.183  1.00130.69           C
ATOM   1571  O   THR A 195       0.148   5.041  36.481  1.00130.69           O
ATOM   1572  N   TYR A 196      -1.371   3.388  36.766  1.00 92.09           N
ATOM   1573  CA  TYR A 196      -1.273   2.865  35.434  1.00 92.09           C
ATOM   1574  CB  TYR A 196      -0.514   1.527  35.344  1.00 92.09           C
ATOM   1575  CG  TYR A 196       0.927   1.813  35.618  1.00 92.09           C
ATOM   1576  CD1 TYR A 196       1.760   2.224  34.601  1.00 92.09           C
ATOM   1577  CD2 TYR A 196       1.449   1.678  36.886  1.00 92.09           C
ATOM   1578  CE1 TYR A 196       3.087   2.495  34.841  1.00 92.09           C
ATOM   1579  CE2 TYR A 196       2.776   1.947  37.131  1.00 92.09           C
ATOM   1580  CZ  TYR A 196       3.600   2.357  36.109  1.00 92.09           C
ATOM   1581  OH  TYR A 196       4.960   2.634  36.362  1.00 92.09           O
ATOM   1582  C   TYR A 196      -2.688   2.656  34.997  1.00 92.09           C
ATOM   1583  O   TYR A 196      -3.617   2.897  35.767  1.00 92.09           O
ATOM   1584  N   MET A 197      -2.894   2.265  33.725  1.00 80.07           N
ATOM   1585  CA  MET A 197      -4.225   2.073  33.231  1.00 80.07           C
ATOM   1586  CB  MET A 197      -4.521   2.893  31.963  1.00 80.07           C
ATOM   1587  CG  MET A 197      -4.586   4.403  32.211  1.00 80.07           C
ATOM   1588  SD  MET A 197      -6.131   4.984  32.973  1.00 80.07           S
ATOM   1589  CE  MET A 197      -6.931   5.395  31.392  1.00 80.07           C
ATOM   1590  C   MET A 197      -4.410   0.631  32.875  1.00 80.07           C
ATOM   1591  O   MET A 197      -3.548   0.005  32.259  1.00 80.07           O
ATOM   1592  N   LEU A 198      -5.554   0.062  33.299  1.00 61.84           N
ATOM   1593  CA  LEU A 198      -5.920  -1.277  32.954  1.00 61.84           C
ATOM   1594  CB  LEU A 198      -6.143  -2.187  34.174  1.00 61.84           C
ATOM   1595  CG  LEU A 198      -4.821  -2.650  34.808  1.00 61.84           C
ATOM   1596  CD1 LEU A 198      -3.906  -1.457  35.099  1.00 61.84           C
ATOM   1597  CD2 LEU A 198      -5.064  -3.531  36.043  1.00 61.84           C
ATOM   1598  C   LEU A 198      -7.212  -1.180  32.210  1.00 61.84           C
ATOM   1599  O   LEU A 198      -8.142  -0.502  32.649  1.00 61.84           O
ATOM   1600  N   VAL A 199      -7.281  -1.841  31.037  1.00118.21           N
ATOM   1601  CA  VAL A 199      -8.486  -1.824  30.258  1.00118.21           C
ATOM   1602  CB  VAL A 199      -8.341  -1.330  28.855  1.00118.21           C
ATOM   1603  CG1 VAL A 199      -7.908   0.139  28.873  1.00118.21           C
ATOM   1604  CG2 VAL A 199      -7.375  -2.271  28.132  1.00118.21           C
ATOM   1605  C   VAL A 199      -8.948  -3.236  30.131  1.00118.21           C
ATOM   1606  O   VAL A 199      -8.150  -4.158  29.970  1.00118.21           O
ATOM   1607  N   ASN A 200     -10.276  -3.422  30.212  1.00 77.78           N
ATOM   1608  CA  ASN A 200     -10.907  -4.703  30.124  1.00 77.78           C
ATOM   1609  CB  ASN A 200     -12.155  -4.809  31.028  1.00 77.78           C
ATOM   1610  CG  ASN A 200     -13.109  -3.664  30.700  1.00 77.78           C
ATOM   1611  OD1 ASN A 200     -13.487  -3.458  29.549  1.00 77.78           O
ATOM   1612  ND2 ASN A 200     -13.500  -2.888  31.746  1.00 77.78           N
ATOM   1613  C   ASN A 200     -11.272  -4.992  28.699  1.00 77.78           C
ATOM   1614  O   ASN A 200     -10.986  -4.211  27.792  1.00 77.78           O
ATOM   1615  N   LYS A 201     -11.922  -6.156  28.485  1.00117.56           N
ATOM   1616  CA  LYS A 201     -12.304  -6.661  27.194  1.00117.56           C
ATOM   1617  CB  LYS A 201     -13.124  -7.957  27.325  1.00117.56           C
ATOM   1618  CG  LYS A 201     -13.450  -8.671  26.014  1.00117.56           C
ATOM   1619  CD  LYS A 201     -12.272  -9.444  25.423  1.00117.56           C
ATOM   1620  CE  LYS A 201     -12.661 -10.338  24.242  1.00117.56           C
ATOM   1621  NZ  LYS A 201     -11.483 -11.105  23.781  1.00117.56           N
ATOM   1622  C   LYS A 201     -13.197  -5.657  26.525  1.00117.56           C
ATOM   1623  O   LYS A 201     -13.122  -5.449  25.314  1.00117.56           O
ATOM   1624  N   ALA A 202     -14.098  -5.037  27.307  1.00 43.31           N
ATOM   1625  CA  ALA A 202     -15.028  -4.051  26.830  1.00 43.31           C
ATOM   1626  CB  ALA A 202     -16.064  -3.627  27.887  1.00 43.31           C
ATOM   1627  C   ALA A 202     -14.296  -2.824  26.378  1.00 43.31           C
ATOM   1628  O   ALA A 202     -14.706  -2.175  25.418  1.00 43.31           O
ATOM   1629  N   GLY A 203     -13.182  -2.467  27.044  1.00 37.04           N
ATOM   1630  CA  GLY A 203     -12.510  -1.254  26.672  1.00 37.04           C
ATOM   1631  C   GLY A 203     -12.720  -0.229  27.745  1.00 37.04           C
ATOM   1632  O   GLY A 203     -12.438   0.952  27.547  1.00 37.04           O
ATOM   1633  N   LYS A 204     -13.265  -0.648  28.905  1.00 98.32           N
ATOM   1634  CA  LYS A 204     -13.403   0.278  29.992  1.00 98.32           C
ATOM   1635  CB  LYS A 204     -14.446  -0.161  31.030  1.00 98.32           C
ATOM   1636  CG  LYS A 204     -14.897   0.956  31.972  1.00 98.32           C
ATOM   1637  CD  LYS A 204     -16.129   0.586  32.801  1.00 98.32           C
ATOM   1638  CE  LYS A 204     -17.239  -0.084  31.989  1.00 98.32           C
ATOM   1639  NZ  LYS A 204     -16.949  -1.529  31.841  1.00 98.32           N
ATOM   1640  C   LYS A 204     -12.067   0.353  30.668  1.00 98.32           C
ATOM   1641  O   LYS A 204     -11.414  -0.667  30.891  1.00 98.32           O
ATOM   1642  N   ALA A 205     -11.617   1.571  31.029  1.00 39.95           N
ATOM   1643  CA  ALA A 205     -10.318   1.663  31.630  1.00 39.95           C
ATOM   1644  CB  ALA A 205      -9.340   2.570  30.860  1.00 39.95           C
ATOM   1645  C   ALA A 205     -10.433   2.209  33.018  1.00 39.95           C
ATOM   1646  O   ALA A 205     -11.273   3.060  33.309  1.00 39.95           O
ATOM   1647  N   TYR A 206      -9.574   1.694  33.923  1.00 98.06           N
ATOM   1648  CA  TYR A 206      -9.520   2.170  35.279  1.00 98.06           C
ATOM   1649  CB  TYR A 206      -9.992   1.146  36.324  1.00 98.06           C
ATOM   1650  CG  TYR A 206     -11.444   0.902  36.103  1.00 98.06           C
ATOM   1651  CD1 TYR A 206     -12.375   1.747  36.658  1.00 98.06           C
ATOM   1652  CD2 TYR A 206     -11.873  -0.156  35.333  1.00 98.06           C
ATOM   1653  CE1 TYR A 206     -13.718   1.535  36.462  1.00 98.06           C
ATOM   1654  CE2 TYR A 206     -13.216  -0.373  35.134  1.00 98.06           C
ATOM   1655  CZ  TYR A 206     -14.140   0.473  35.700  1.00 98.06           C
ATOM   1656  OH  TYR A 206     -15.518   0.252  35.498  1.00 98.06           O
ATOM   1657  C   TYR A 206      -8.083   2.473  35.599  1.00 98.06           C
ATOM   1658  O   TYR A 206      -7.176   1.945  34.959  1.00 98.06           O
ATOM   1659  N   TYR A 207      -7.851   3.372  36.583  1.00 61.94           N
ATOM   1660  CA  TYR A 207      -6.526   3.706  37.043  1.00 61.94           C
ATOM   1661  CB  TYR A 207      -6.378   5.124  37.633  1.00 61.94           C
ATOM   1662  CG  TYR A 207      -6.362   6.145  36.546  1.00 61.94           C
ATOM   1663  CD1 TYR A 207      -5.223   6.336  35.797  1.00 61.94           C
ATOM   1664  CD2 TYR A 207      -7.463   6.929  36.292  1.00 61.94           C
ATOM   1665  CE1 TYR A 207      -5.186   7.280  34.798  1.00 61.94           C
ATOM   1666  CE2 TYR A 207      -7.430   7.875  35.294  1.00 61.94           C
ATOM   1667  CZ  TYR A 207      -6.293   8.052  34.543  1.00 61.94           C
ATOM   1668  OH  TYR A 207      -6.265   9.023  33.520  1.00 61.94           O
ATOM   1669  C   TYR A 207      -6.172   2.755  38.146  1.00 61.94           C
ATOM   1670  O   TYR A 207      -6.977   2.509  39.044  1.00 61.94           O
ATOM   1671  N   VAL A 208      -4.942   2.192  38.108  1.00108.83           N
ATOM   1672  CA  VAL A 208      -4.575   1.239  39.115  1.00108.83           C
ATOM   1673  CB  VAL A 208      -4.448  -0.158  38.593  1.00108.83           C
ATOM   1674  CG1 VAL A 208      -5.779  -0.582  37.952  1.00108.83           C
ATOM   1675  CG2 VAL A 208      -3.227  -0.194  37.663  1.00108.83           C
ATOM   1676  C   VAL A 208      -3.218   1.557  39.666  1.00108.83           C
ATOM   1677  O   VAL A 208      -2.372   2.153  39.001  1.00108.83           O
ATOM   1678  N   LYS A 209      -3.004   1.145  40.932  1.00131.67           N
ATOM   1679  CA  LYS A 209      -1.757   1.250  41.629  1.00131.67           C
ATOM   1680  CB  LYS A 209      -1.898   2.089  42.900  1.00131.67           C
ATOM   1681  CG  LYS A 209      -0.572   2.527  43.498  1.00131.67           C
ATOM   1682  CD  LYS A 209      -0.727   3.698  44.460  1.00131.67           C
ATOM   1683  CE  LYS A 209      -0.971   5.026  43.744  1.00131.67           C
ATOM   1684  NZ  LYS A 209       0.126   5.282  42.787  1.00131.67           N
ATOM   1685  C   LYS A 209      -1.429  -0.164  42.019  1.00131.67           C
ATOM   1686  O   LYS A 209      -2.339  -0.960  42.252  1.00131.67           O
ATOM   1687  N   PHE A 210      -0.129  -0.529  42.071  1.00 55.94           N
ATOM   1688  CA  PHE A 210       0.229  -1.885  42.394  1.00 55.94           C
ATOM   1689  CB  PHE A 210       1.012  -2.611  41.280  1.00 55.94           C
ATOM   1690  CG  PHE A 210       0.052  -2.883  40.165  1.00 55.94           C
ATOM   1691  CD1 PHE A 210      -0.701  -4.037  40.143  1.00 55.94           C
ATOM   1692  CD2 PHE A 210      -0.102  -1.980  39.137  1.00 55.94           C
ATOM   1693  CE1 PHE A 210      -1.587  -4.285  39.120  1.00 55.94           C
ATOM   1694  CE2 PHE A 210      -0.986  -2.223  38.110  1.00 55.94           C
ATOM   1695  CZ  PHE A 210      -1.731  -3.378  38.098  1.00 55.94           C
ATOM   1696  C   PHE A 210       1.028  -1.904  43.659  1.00 55.94           C
ATOM   1697  O   PHE A 210       1.820  -0.999  43.919  1.00 55.94           O
ATOM   1698  N   HIS A 211       0.813  -2.948  44.493  1.00 64.67           N
ATOM   1699  CA  HIS A 211       1.475  -3.017  45.761  1.00 64.67           C
ATOM   1700  ND1 HIS A 211       1.625  -0.241  47.547  1.00 64.67           N
ATOM   1701  CG  HIS A 211       0.625  -0.992  46.971  1.00 64.67           C
ATOM   1702  CB  HIS A 211       0.635  -2.491  46.934  1.00 64.67           C
ATOM   1703  NE2 HIS A 211       0.144   1.199  46.731  1.00 64.67           N
ATOM   1704  CD2 HIS A 211      -0.273  -0.096  46.478  1.00 64.67           C
ATOM   1705  CE1 HIS A 211       1.288   1.061  47.375  1.00 64.67           C
ATOM   1706  C   HIS A 211       1.935  -4.409  46.074  1.00 64.67           C
ATOM   1707  O   HIS A 211       1.259  -5.396  45.783  1.00 64.67           O
ATOM   1708  N   TRP A 212       3.136  -4.493  46.688  1.00 89.64           N
ATOM   1709  CA  TRP A 212       3.740  -5.742  47.064  1.00 89.64           C
ATOM   1710  CB  TRP A 212       5.191  -5.874  46.569  1.00 89.64           C
ATOM   1711  CG  TRP A 212       5.361  -5.810  45.070  1.00 89.64           C
ATOM   1712  CD2 TRP A 212       5.002  -6.873  44.182  1.00 89.64           C
ATOM   1713  CD1 TRP A 212       5.848  -4.801  44.292  1.00 89.64           C
ATOM   1714  NE1 TRP A 212       5.829  -5.179  42.971  1.00 89.64           N
ATOM   1715  CE2 TRP A 212       5.306  -6.452  42.887  1.00 89.64           C
ATOM   1716  CE3 TRP A 212       4.466  -8.100  44.427  1.00 89.64           C
ATOM   1717  CZ2 TRP A 212       5.080  -7.259  41.808  1.00 89.64           C
ATOM   1718  CZ3 TRP A 212       4.234  -8.901  43.338  1.00 89.64           C
ATOM   1719  CH2 TRP A 212       4.534  -8.499  42.052  1.00 89.64           C
ATOM   1720  C   TRP A 212       3.842  -5.748  48.564  1.00 89.64           C
ATOM   1721  O   TRP A 212       4.319  -4.781  49.158  1.00 89.64           O
ATOM   1722  N   LYS A 213       3.397  -6.848  49.210  1.00131.24           N
ATOM   1723  CA  LYS A 213       3.483  -6.969  50.644  1.00131.24           C
ATOM   1724  CB  LYS A 213       2.117  -7.180  51.320  1.00131.24           C
ATOM   1725  CG  LYS A 213       1.165  -6.002  51.120  1.00131.24           C
ATOM   1726  CD  LYS A 213       1.752  -4.675  51.601  1.00131.24           C
ATOM   1727  CE  LYS A 213       2.076  -4.656  53.094  1.00131.24           C
ATOM   1728  NZ  LYS A 213       2.644  -3.342  53.469  1.00131.24           N
ATOM   1729  C   LYS A 213       4.297  -8.197  50.925  1.00131.24           C
ATOM   1730  O   LYS A 213       3.982  -9.275  50.430  1.00131.24           O
ATOM   1731  N   PRO A 214       5.350  -8.072  51.699  1.00 83.88           N
ATOM   1732  CA  PRO A 214       6.215  -9.188  51.993  1.00 83.88           C
ATOM   1733  CD  PRO A 214       5.985  -6.792  51.955  1.00 83.88           C
ATOM   1734  CB  PRO A 214       7.552  -8.576  52.413  1.00 83.88           C
ATOM   1735  CG  PRO A 214       7.193  -7.141  52.838  1.00 83.88           C
ATOM   1736  C   PRO A 214       5.656 -10.096  53.040  1.00 83.88           C
ATOM   1737  O   PRO A 214       5.116  -9.605  54.030  1.00 83.88           O
ATOM   1738  N   THR A 215       5.820 -11.422  52.864  1.00106.80           N
ATOM   1739  CA  THR A 215       5.362 -12.377  53.831  1.00106.80           C
ATOM   1740  CB  THR A 215       5.499 -13.789  53.354  1.00106.80           C
ATOM   1741  OG1 THR A 215       6.867 -14.109  53.154  1.00106.80           O
ATOM   1742  CG2 THR A 215       4.725 -13.921  52.032  1.00106.80           C
ATOM   1743  C   THR A 215       6.198 -12.222  55.065  1.00106.80           C
ATOM   1744  O   THR A 215       5.712 -12.363  56.187  1.00106.80           O
ATOM   1745  N   CYS A 216       7.500 -11.941  54.863  1.00 53.10           N
ATOM   1746  CA  CYS A 216       8.483 -11.766  55.897  1.00 53.10           C
ATOM   1747  CB  CYS A 216       9.913 -11.652  55.349  1.00 53.10           C
ATOM   1748  SG  CYS A 216      10.491 -13.228  54.652  1.00 53.10           S
ATOM   1749  C   CYS A 216       8.185 -10.525  56.679  1.00 53.10           C
ATOM   1750  O   CYS A 216       8.658 -10.370  57.803  1.00 53.10           O
ATOM   1751  N   GLY A 217       7.456  -9.565  56.084  1.00 23.99           N
ATOM   1752  CA  GLY A 217       7.137  -8.370  56.810  1.00 23.99           C
ATOM   1753  C   GLY A 217       8.191  -7.360  56.501  1.00 23.99           C
ATOM   1754  O   GLY A 217       9.262  -7.696  55.997  1.00 23.99           O
ATOM   1755  N   VAL A 218       7.908  -6.080  56.813  1.00 41.57           N
ATOM   1756  CA  VAL A 218       8.867  -5.047  56.556  1.00 41.57           C
ATOM   1757  CB  VAL A 218       8.256  -3.686  56.387  1.00 41.57           C
ATOM   1758  CG1 VAL A 218       9.390  -2.655  56.251  1.00 41.57           C
ATOM   1759  CG2 VAL A 218       7.285  -3.714  55.196  1.00 41.57           C
ATOM   1760  C   VAL A 218       9.753  -4.946  57.757  1.00 41.57           C
ATOM   1761  O   VAL A 218       9.280  -4.736  58.873  1.00 41.57           O
ATOM   1762  N   LYS A 219      11.077  -5.099  57.557  1.00100.08           N
ATOM   1763  CA  LYS A 219      11.991  -4.967  58.656  1.00100.08           C
ATOM   1764  CB  LYS A 219      12.756  -6.267  58.964  1.00100.08           C
ATOM   1765  CG  LYS A 219      13.646  -6.181  60.204  1.00100.08           C
ATOM   1766  CD  LYS A 219      14.081  -7.547  60.736  1.00100.08           C
ATOM   1767  CE  LYS A 219      14.920  -7.455  62.010  1.00100.08           C
ATOM   1768  NZ  LYS A 219      14.201  -6.649  63.022  1.00100.08           N
ATOM   1769  C   LYS A 219      12.989  -3.915  58.270  1.00100.08           C
ATOM   1770  O   LYS A 219      13.522  -3.933  57.161  1.00100.08           O
ATOM   1771  N   SER A 220      13.276  -2.964  59.186  1.00 76.95           N
ATOM   1772  CA  SER A 220      14.167  -1.891  58.837  1.00 76.95           C
ATOM   1773  CB  SER A 220      13.486  -0.513  58.804  1.00 76.95           C
ATOM   1774  OG  SER A 220      12.994  -0.177  60.093  1.00 76.95           O
ATOM   1775  C   SER A 220      15.286  -1.820  59.828  1.00 76.95           C
ATOM   1776  O   SER A 220      15.278  -2.490  60.858  1.00 76.95           O
ATOM   1777  N   LEU A 221      16.308  -1.005  59.495  1.00 52.44           N
ATOM   1778  CA  LEU A 221      17.453  -0.822  60.337  1.00 52.44           C
ATOM   1779  CB  LEU A 221      18.783  -1.086  59.604  1.00 52.44           C
ATOM   1780  CG  LEU A 221      18.959  -2.542  59.132  1.00 52.44           C
ATOM   1781  CD1 LEU A 221      20.311  -2.750  58.424  1.00 52.44           C
ATOM   1782  CD2 LEU A 221      18.732  -3.523  60.293  1.00 52.44           C
ATOM   1783  C   LEU A 221      17.488   0.609  60.768  1.00 52.44           C
ATOM   1784  O   LEU A 221      17.146   1.509  60.004  1.00 52.44           O
ATOM   1785  N   LEU A 222      17.878   0.851  62.034  1.00140.93           N
ATOM   1786  CA  LEU A 222      18.050   2.188  62.520  1.00140.93           C
ATOM   1787  CB  LEU A 222      18.001   2.297  64.055  1.00140.93           C
ATOM   1788  CG  LEU A 222      18.266   3.719  64.580  1.00140.93           C
ATOM   1789  CD1 LEU A 222      17.313   4.734  63.934  1.00140.93           C
ATOM   1790  CD2 LEU A 222      18.232   3.763  66.116  1.00140.93           C
ATOM   1791  C   LEU A 222      19.396   2.625  62.028  1.00140.93           C
ATOM   1792  O   LEU A 222      20.148   1.822  61.480  1.00140.93           O
ATOM   1793  N   GLU A 223      19.732   3.918  62.180  1.00 44.09           N
ATOM   1794  CA  GLU A 223      20.986   4.400  61.679  1.00 44.09           C
ATOM   1795  CB  GLU A 223      21.206   5.902  61.937  1.00 44.09           C
ATOM   1796  CG  GLU A 223      20.302   6.825  61.113  1.00 44.09           C
ATOM   1797  CD  GLU A 223      20.863   8.233  61.250  1.00 44.09           C
ATOM   1798  OE1 GLU A 223      21.863   8.392  62.001  1.00 44.09           O
ATOM   1799  OE2 GLU A 223      20.311   9.165  60.607  1.00 44.09           O
ATOM   1800  C   GLU A 223      22.116   3.667  62.343  1.00 44.09           C
ATOM   1801  O   GLU A 223      23.096   3.315  61.687  1.00 44.09           O
ATOM   1802  N   ASP A 224      22.008   3.411  63.660  1.00 51.58           N
ATOM   1803  CA  ASP A 224      23.066   2.786  64.404  1.00 51.58           C
ATOM   1804  CB  ASP A 224      22.681   2.516  65.868  1.00 51.58           C
ATOM   1805  CG  ASP A 224      22.263   3.806  66.552  1.00 51.58           C
ATOM   1806  OD1 ASP A 224      22.858   4.876  66.258  1.00 51.58           O
ATOM   1807  OD2 ASP A 224      21.321   3.728  67.387  1.00 51.58           O
ATOM   1808  C   ASP A 224      23.295   1.418  63.856  1.00 51.58           C
ATOM   1809  O   ASP A 224      24.431   1.001  63.638  1.00 51.58           O
ATOM   1810  N   GLU A 225      22.193   0.684  63.633  1.00 46.44           N
ATOM   1811  CA  GLU A 225      22.259  -0.681  63.205  1.00 46.44           C
ATOM   1812  CB  GLU A 225      20.886  -1.364  63.201  1.00 46.44           C
ATOM   1813  CG  GLU A 225      20.372  -1.574  64.627  1.00 46.44           C
ATOM   1814  CD  GLU A 225      19.011  -2.240  64.564  1.00 46.44           C
ATOM   1815  OE1 GLU A 225      18.113  -1.689  63.873  1.00 46.44           O
ATOM   1816  OE2 GLU A 225      18.850  -3.309  65.207  1.00 46.44           O
ATOM   1817  C   GLU A 225      22.857  -0.748  61.841  1.00 46.44           C
ATOM   1818  O   GLU A 225      23.651  -1.642  61.556  1.00 46.44           O
ATOM   1819  N   ALA A 226      22.509   0.214  60.967  1.00 27.25           N
ATOM   1820  CA  ALA A 226      23.019   0.198  59.630  1.00 27.25           C
ATOM   1821  CB  ALA A 226      22.510   1.379  58.781  1.00 27.25           C
ATOM   1822  C   ALA A 226      24.514   0.294  59.691  1.00 27.25           C
ATOM   1823  O   ALA A 226      25.221  -0.395  58.956  1.00 27.25           O
ATOM   1824  N   ILE A 227      25.035   1.156  60.584  1.00 33.63           N
ATOM   1825  CA  ILE A 227      26.453   1.328  60.718  1.00 33.63           C
ATOM   1826  CB  ILE A 227      26.827   2.423  61.673  1.00 33.63           C
ATOM   1827  CG1 ILE A 227      26.341   3.775  61.127  1.00 33.63           C
ATOM   1828  CG2 ILE A 227      28.344   2.353  61.913  1.00 33.63           C
ATOM   1829  CD1 ILE A 227      26.505   4.932  62.109  1.00 33.63           C
ATOM   1830  C   ILE A 227      27.070   0.054  61.202  1.00 33.63           C
ATOM   1831  O   ILE A 227      28.134  -0.348  60.733  1.00 33.63           O
ATOM   1832  N   LYS A 228      26.416  -0.619  62.166  1.00 89.46           N
ATOM   1833  CA  LYS A 228      26.967  -1.819  62.723  1.00 89.46           C
ATOM   1834  CB  LYS A 228      26.058  -2.445  63.796  1.00 89.46           C
ATOM   1835  CG  LYS A 228      26.639  -3.724  64.405  1.00 89.46           C
ATOM   1836  CD  LYS A 228      25.830  -4.269  65.585  1.00 89.46           C
ATOM   1837  CE  LYS A 228      24.434  -4.755  65.185  1.00 89.46           C
ATOM   1838  NZ  LYS A 228      24.538  -5.928  64.291  1.00 89.46           N
ATOM   1839  C   LYS A 228      27.109  -2.840  61.638  1.00 89.46           C
ATOM   1840  O   LYS A 228      28.159  -3.465  61.499  1.00 89.46           O
ATOM   1841  N   VAL A 229      26.054  -3.033  60.827  1.00104.24           N
ATOM   1842  CA  VAL A 229      26.116  -4.053  59.821  1.00104.24           C
ATOM   1843  CB  VAL A 229      24.795  -4.358  59.176  1.00104.24           C
ATOM   1844  CG1 VAL A 229      24.336  -3.155  58.340  1.00104.24           C
ATOM   1845  CG2 VAL A 229      24.951  -5.657  58.370  1.00104.24           C
ATOM   1846  C   VAL A 229      27.118  -3.697  58.765  1.00104.24           C
ATOM   1847  O   VAL A 229      27.825  -4.566  58.258  1.00104.24           O
ATOM   1848  N   GLY A 230      27.232  -2.398  58.426  1.00 33.34           N
ATOM   1849  CA  GLY A 230      28.100  -1.974  57.362  1.00 33.34           C
ATOM   1850  C   GLY A 230      29.515  -2.381  57.644  1.00 33.34           C
ATOM   1851  O   GLY A 230      30.245  -2.762  56.728  1.00 33.34           O
ATOM   1852  N   GLY A 231      29.953  -2.286  58.913  1.00 33.67           N
ATOM   1853  CA  GLY A 231      31.308  -2.610  59.255  1.00 33.67           C
ATOM   1854  C   GLY A 231      31.568  -4.062  58.988  1.00 33.67           C
ATOM   1855  O   GLY A 231      32.660  -4.425  58.548  1.00 33.67           O
ATOM   1856  N   ALA A 232      30.601  -4.929  59.359  1.00 57.25           N
ATOM   1857  CA  ALA A 232      30.698  -6.351  59.158  1.00 57.25           C
ATOM   1858  CB  ALA A 232      29.610  -7.122  59.925  1.00 57.25           C
ATOM   1859  C   ALA A 232      30.579  -6.746  57.711  1.00 57.25           C
ATOM   1860  O   ALA A 232      31.414  -7.501  57.213  1.00 57.25           O
ATOM   1861  N   ASN A 233      29.535  -6.271  56.983  1.00140.58           N
ATOM   1862  CA  ASN A 233      29.486  -6.679  55.603  1.00140.58           C
ATOM   1863  CB  ASN A 233      28.991  -8.116  55.341  1.00140.58           C
ATOM   1864  CG  ASN A 233      27.498  -8.183  55.522  1.00140.58           C
ATOM   1865  OD1 ASN A 233      26.769  -7.627  54.708  1.00140.58           O
ATOM   1866  ND2 ASN A 233      27.029  -8.890  56.583  1.00140.58           N
ATOM   1867  C   ASN A 233      28.724  -5.684  54.772  1.00140.58           C
ATOM   1868  O   ASN A 233      27.611  -5.265  55.090  1.00140.58           O
ATOM   1869  N   HIS A 234      29.379  -5.266  53.673  1.00132.49           N
ATOM   1870  CA  HIS A 234      28.927  -4.313  52.700  1.00132.49           C
ATOM   1871  ND1 HIS A 234      31.297  -5.842  51.123  1.00132.49           N
ATOM   1872  CG  HIS A 234      30.604  -4.692  50.822  1.00132.49           C
ATOM   1873  CB  HIS A 234      30.065  -3.735  51.841  1.00132.49           C
ATOM   1874  NE2 HIS A 234      31.203  -5.721  48.906  1.00132.49           N
ATOM   1875  CD2 HIS A 234      30.554  -4.633  49.463  1.00132.49           C
ATOM   1876  CE1 HIS A 234      31.632  -6.418  49.941  1.00132.49           C
ATOM   1877  C   HIS A 234      27.902  -4.916  51.786  1.00132.49           C
ATOM   1878  O   HIS A 234      27.248  -4.183  51.041  1.00132.49           O
ATOM   1879  N   SER A 235      27.822  -6.264  51.724  1.00104.05           N
ATOM   1880  CA  SER A 235      26.852  -6.877  50.851  1.00104.05           C
ATOM   1881  CB  SER A 235      27.497  -7.858  49.859  1.00104.05           C
ATOM   1882  OG  SER A 235      28.345  -7.154  48.964  1.00104.05           O
ATOM   1883  C   SER A 235      25.853  -7.674  51.649  1.00104.05           C
ATOM   1884  O   SER A 235      25.585  -8.831  51.329  1.00104.05           O
ATOM   1885  N   HIS A 236      25.213  -7.059  52.664  1.00 78.20           N
ATOM   1886  CA  HIS A 236      24.329  -7.794  53.535  1.00 78.20           C
ATOM   1887  ND1 HIS A 236      23.286  -4.655  54.131  1.00 78.20           N
ATOM   1888  CG  HIS A 236      22.972  -5.901  54.626  1.00 78.20           C
ATOM   1889  CB  HIS A 236      23.958  -7.017  54.818  1.00 78.20           C
ATOM   1890  NE2 HIS A 236      21.111  -4.624  54.595  1.00 78.20           N
ATOM   1891  CD2 HIS A 236      21.639  -5.863  54.904  1.00 78.20           C
ATOM   1892  CE1 HIS A 236      22.137  -3.931  54.134  1.00 78.20           C
ATOM   1893  C   HIS A 236      23.053  -8.227  52.884  1.00 78.20           C
ATOM   1894  O   HIS A 236      22.652  -9.382  53.013  1.00 78.20           O
ATOM   1895  N   ALA A 237      22.368  -7.311  52.176  1.00 43.62           N
ATOM   1896  CA  ALA A 237      21.083  -7.638  51.627  1.00 43.62           C
ATOM   1897  CB  ALA A 237      20.380  -6.437  50.968  1.00 43.62           C
ATOM   1898  C   ALA A 237      21.217  -8.714  50.597  1.00 43.62           C
ATOM   1899  O   ALA A 237      20.426  -9.657  50.581  1.00 43.62           O
ATOM   1900  N   THR A 238      22.230  -8.606  49.715  1.00100.59           N
ATOM   1901  CA  THR A 238      22.409  -9.587  48.681  1.00100.59           C
ATOM   1902  CB  THR A 238      23.524  -9.241  47.728  1.00100.59           C
ATOM   1903  OG1 THR A 238      23.574 -10.189  46.669  1.00100.59           O
ATOM   1904  CG2 THR A 238      24.864  -9.209  48.480  1.00100.59           C
ATOM   1905  C   THR A 238      22.713 -10.908  49.316  1.00100.59           C
ATOM   1906  O   THR A 238      22.161 -11.938  48.931  1.00100.59           O
ATOM   1907  N   GLN A 239      23.582 -10.895  50.341  1.00110.28           N
ATOM   1908  CA  GLN A 239      24.019 -12.069  51.036  1.00110.28           C
ATOM   1909  CB  GLN A 239      24.947 -11.660  52.191  1.00110.28           C
ATOM   1910  CG  GLN A 239      25.511 -12.793  53.045  1.00110.28           C
ATOM   1911  CD  GLN A 239      26.279 -12.118  54.173  1.00110.28           C
ATOM   1912  OE1 GLN A 239      26.203 -10.903  54.346  1.00110.28           O
ATOM   1913  NE2 GLN A 239      27.037 -12.923  54.965  1.00110.28           N
ATOM   1914  C   GLN A 239      22.830 -12.754  51.646  1.00110.28           C
ATOM   1915  O   GLN A 239      22.653 -13.961  51.482  1.00110.28           O
ATOM   1916  N   ASP A 240      21.968 -11.995  52.351  1.00 67.79           N
ATOM   1917  CA  ASP A 240      20.839 -12.590  53.013  1.00 67.79           C
ATOM   1918  CB  ASP A 240      20.077 -11.613  53.930  1.00 67.79           C
ATOM   1919  CG  ASP A 240      18.893 -12.347  54.556  1.00 67.79           C
ATOM   1920  OD1 ASP A 240      17.892 -12.578  53.826  1.00 67.79           O
ATOM   1921  OD2 ASP A 240      18.961 -12.674  55.772  1.00 67.79           O
ATOM   1922  C   ASP A 240      19.867 -13.142  52.012  1.00 67.79           C
ATOM   1923  O   ASP A 240      19.354 -14.243  52.199  1.00 67.79           O
ATOM   1924  N   LEU A 241      19.577 -12.403  50.923  1.00159.23           N
ATOM   1925  CA  LEU A 241      18.612 -12.881  49.967  1.00159.23           C
ATOM   1926  CB  LEU A 241      18.374 -11.965  48.756  1.00159.23           C
ATOM   1927  CG  LEU A 241      17.649 -10.639  49.004  1.00159.23           C
ATOM   1928  CD1 LEU A 241      17.435  -9.926  47.659  1.00159.23           C
ATOM   1929  CD2 LEU A 241      16.343 -10.833  49.793  1.00159.23           C
ATOM   1930  C   LEU A 241      19.114 -14.131  49.318  1.00159.23           C
ATOM   1931  O   LEU A 241      18.341 -15.053  49.061  1.00159.23           O
ATOM   1932  N   HIS A 242      20.417 -14.172  48.976  1.00 79.44           N
ATOM   1933  CA  HIS A 242      20.922 -15.338  48.304  1.00 79.44           C
ATOM   1934  ND1 HIS A 242      21.907 -14.697  45.405  1.00 79.44           N
ATOM   1935  CG  HIS A 242      22.544 -14.415  46.593  1.00 79.44           C
ATOM   1936  CB  HIS A 242      22.384 -15.237  47.836  1.00 79.44           C
ATOM   1937  NE2 HIS A 242      23.152 -12.893  45.044  1.00 79.44           N
ATOM   1938  CD2 HIS A 242      23.301 -13.310  46.355  1.00 79.44           C
ATOM   1939  CE1 HIS A 242      22.306 -13.757  44.512  1.00 79.44           C
ATOM   1940  C   HIS A 242      20.829 -16.536  49.197  1.00 79.44           C
ATOM   1941  O   HIS A 242      20.454 -17.618  48.751  1.00 79.44           O
ATOM   1942  N   ASP A 243      21.177 -16.363  50.484  1.00 72.18           N
ATOM   1943  CA  ASP A 243      21.207 -17.424  51.450  1.00 72.18           C
ATOM   1944  CB  ASP A 243      21.703 -16.894  52.808  1.00 72.18           C
ATOM   1945  CG  ASP A 243      22.032 -18.054  53.731  1.00 72.18           C
ATOM   1946  OD1 ASP A 243      21.616 -19.203  53.423  1.00 72.18           O
ATOM   1947  OD2 ASP A 243      22.705 -17.800  54.765  1.00 72.18           O
ATOM   1948  C   ASP A 243      19.826 -17.987  51.649  1.00 72.18           C
ATOM   1949  O   ASP A 243      19.639 -19.202  51.687  1.00 72.18           O
ATOM   1950  N   SER A 244      18.813 -17.108  51.760  1.00 80.77           N
ATOM   1951  CA  SER A 244      17.467 -17.525  52.040  1.00 80.77           C
ATOM   1952  CB  SER A 244      16.495 -16.332  52.148  1.00 80.77           C
ATOM   1953  OG  SER A 244      16.861 -15.498  53.237  1.00 80.77           O
ATOM   1954  C   SER A 244      16.971 -18.414  50.938  1.00 80.77           C
ATOM   1955  O   SER A 244      16.320 -19.425  51.195  1.00 80.77           O
ATOM   1956  N   ILE A 245      17.246 -18.053  49.671  1.00 51.35           N
ATOM   1957  CA  ILE A 245      16.780 -18.842  48.564  1.00 51.35           C
ATOM   1958  CB  ILE A 245      16.994 -18.171  47.239  1.00 51.35           C
ATOM   1959  CG1 ILE A 245      16.215 -16.841  47.199  1.00 51.35           C
ATOM   1960  CG2 ILE A 245      16.568 -19.155  46.135  1.00 51.35           C
ATOM   1961  CD1 ILE A 245      16.618 -15.919  46.051  1.00 51.35           C
ATOM   1962  C   ILE A 245      17.481 -20.167  48.559  1.00 51.35           C
ATOM   1963  O   ILE A 245      16.860 -21.201  48.317  1.00 51.35           O
ATOM   1964  N   MET A 246      18.804 -20.172  48.817  1.00 29.78           N
ATOM   1965  CA  MET A 246      19.558 -21.396  48.807  1.00 29.78           C
ATOM   1966  CB  MET A 246      21.064 -21.185  49.036  1.00 29.78           C
ATOM   1967  CG  MET A 246      21.863 -22.490  49.026  1.00 29.78           C
ATOM   1968  SD  MET A 246      23.655 -22.282  49.244  1.00 29.78           S
ATOM   1969  CE  MET A 246      23.548 -21.645  50.941  1.00 29.78           C
ATOM   1970  C   MET A 246      19.059 -22.295  49.902  1.00 29.78           C
ATOM   1971  O   MET A 246      18.961 -23.509  49.725  1.00 29.78           O
ATOM   1972  N   ALA A 247      18.741 -21.699  51.067  1.00 36.53           N
ATOM   1973  CA  ALA A 247      18.279 -22.375  52.249  1.00 36.53           C
ATOM   1974  CB  ALA A 247      18.114 -21.427  53.449  1.00 36.53           C
ATOM   1975  C   ALA A 247      16.952 -23.021  51.987  1.00 36.53           C
ATOM   1976  O   ALA A 247      16.664 -24.090  52.520  1.00 36.53           O
ATOM   1977  N   GLY A 248      16.097 -22.397  51.155  1.00 38.65           N
ATOM   1978  CA  GLY A 248      14.801 -22.967  50.932  1.00 38.65           C
ATOM   1979  C   GLY A 248      13.784 -22.156  51.670  1.00 38.65           C
ATOM   1980  O   GLY A 248      12.627 -22.558  51.789  1.00 38.65           O
ATOM   1981  N   ASN A 249      14.199 -21.004  52.229  1.00 72.94           N
ATOM   1982  CA  ASN A 249      13.235 -20.123  52.824  1.00 72.94           C
ATOM   1983  CB  ASN A 249      13.807 -19.379  54.048  1.00 72.94           C
ATOM   1984  CG  ASN A 249      12.691 -18.850  54.943  1.00 72.94           C
ATOM   1985  OD1 ASN A 249      11.539 -18.720  54.530  1.00 72.94           O
ATOM   1986  ND2 ASN A 249      13.051 -18.535  56.217  1.00 72.94           N
ATOM   1987  C   ASN A 249      12.983 -19.118  51.736  1.00 72.94           C
ATOM   1988  O   ASN A 249      13.581 -18.044  51.724  1.00 72.94           O
ATOM   1989  N   TYR A 250      12.058 -19.438  50.806  1.00 91.86           N
ATOM   1990  CA  TYR A 250      11.880 -18.636  49.624  1.00 91.86           C
ATOM   1991  CB  TYR A 250      11.039 -19.301  48.517  1.00 91.86           C
ATOM   1992  CG  TYR A 250      11.600 -20.643  48.187  1.00 91.86           C
ATOM   1993  CD1 TYR A 250      12.813 -20.775  47.552  1.00 91.86           C
ATOM   1994  CD2 TYR A 250      10.911 -21.780  48.547  1.00 91.86           C
ATOM   1995  CE1 TYR A 250      13.318 -22.022  47.261  1.00 91.86           C
ATOM   1996  CE2 TYR A 250      11.409 -23.028  48.258  1.00 91.86           C
ATOM   1997  CZ  TYR A 250      12.614 -23.151  47.610  1.00 91.86           C
ATOM   1998  OH  TYR A 250      13.129 -24.430  47.312  1.00 91.86           O
ATOM   1999  C   TYR A 250      11.161 -17.365  49.955  1.00 91.86           C
ATOM   2000  O   TYR A 250      10.120 -17.366  50.612  1.00 91.86           O
ATOM   2001  N   PRO A 251      11.702 -16.269  49.487  1.00 79.28           N
ATOM   2002  CA  PRO A 251      11.071 -14.995  49.695  1.00 79.28           C
ATOM   2003  CD  PRO A 251      13.138 -16.147  49.296  1.00 79.28           C
ATOM   2004  CB  PRO A 251      12.092 -13.949  49.255  1.00 79.28           C
ATOM   2005  CG  PRO A 251      13.447 -14.650  49.474  1.00 79.28           C
ATOM   2006  C   PRO A 251       9.787 -14.950  48.925  1.00 79.28           C
ATOM   2007  O   PRO A 251       9.771 -15.382  47.772  1.00 79.28           O
ATOM   2008  N   GLU A 252       8.704 -14.425  49.532  1.00 43.66           N
ATOM   2009  CA  GLU A 252       7.451 -14.364  48.839  1.00 43.66           C
ATOM   2010  CB  GLU A 252       6.454 -15.453  49.275  1.00 43.66           C
ATOM   2011  CG  GLU A 252       6.915 -16.866  48.898  1.00 43.66           C
ATOM   2012  CD  GLU A 252       5.800 -17.850  49.221  1.00 43.66           C
ATOM   2013  OE1 GLU A 252       4.609 -17.448  49.130  1.00 43.66           O
ATOM   2014  OE2 GLU A 252       6.126 -19.018  49.562  1.00 43.66           O
ATOM   2015  C   GLU A 252       6.820 -13.035  49.106  1.00 43.66           C
ATOM   2016  O   GLU A 252       7.029 -12.431  50.156  1.00 43.66           O
ATOM   2017  N   TRP A 253       6.041 -12.536  48.125  1.00 72.23           N
ATOM   2018  CA  TRP A 253       5.355 -11.279  48.248  1.00 72.23           C
ATOM   2019  CB  TRP A 253       5.973 -10.148  47.405  1.00 72.23           C
ATOM   2020  CG  TRP A 253       7.286  -9.587  47.901  1.00 72.23           C
ATOM   2021  CD2 TRP A 253       8.567 -10.200  47.701  1.00 72.23           C
ATOM   2022  CD1 TRP A 253       7.513  -8.435  48.596  1.00 72.23           C
ATOM   2023  NE1 TRP A 253       8.859  -8.287  48.833  1.00 72.23           N
ATOM   2024  CE2 TRP A 253       9.519  -9.371  48.289  1.00 72.23           C
ATOM   2025  CE3 TRP A 253       8.922 -11.363  47.076  1.00 72.23           C
ATOM   2026  CZ2 TRP A 253      10.847  -9.687  48.261  1.00 72.23           C
ATOM   2027  CZ3 TRP A 253      10.261 -11.680  47.050  1.00 72.23           C
ATOM   2028  CH2 TRP A 253      11.205 -10.859  47.630  1.00 72.23           C
ATOM   2029  C   TRP A 253       3.974 -11.453  47.705  1.00 72.23           C
ATOM   2030  O   TRP A 253       3.725 -12.286  46.837  1.00 72.23           O
ATOM   2031  N   LYS A 254       3.035 -10.636  48.212  1.00 75.93           N
ATOM   2032  CA  LYS A 254       1.666 -10.676  47.792  1.00 75.93           C
ATOM   2033  CB  LYS A 254       0.731 -10.637  49.009  1.00 75.93           C
ATOM   2034  CG  LYS A 254       1.040 -11.784  49.975  1.00 75.93           C
ATOM   2035  CD  LYS A 254       0.509 -11.597  51.395  1.00 75.93           C
ATOM   2036  CE  LYS A 254       0.977 -12.694  52.355  1.00 75.93           C
ATOM   2037  NZ  LYS A 254       0.489 -14.012  51.890  1.00 75.93           N
ATOM   2038  C   LYS A 254       1.430  -9.441  46.973  1.00 75.93           C
ATOM   2039  O   LYS A 254       1.874  -8.352  47.332  1.00 75.93           O
ATOM   2040  N   LEU A 255       0.730  -9.585  45.827  1.00 62.32           N
ATOM   2041  CA  LEU A 255       0.477  -8.454  44.972  1.00 62.32           C
ATOM   2042  CB  LEU A 255       0.669  -8.773  43.477  1.00 62.32           C
ATOM   2043  CG  LEU A 255       0.404  -7.579  42.540  1.00 62.32           C
ATOM   2044  CD1 LEU A 255       1.406  -6.436  42.780  1.00 62.32           C
ATOM   2045  CD2 LEU A 255       0.353  -8.031  41.070  1.00 62.32           C
ATOM   2046  C   LEU A 255      -0.944  -7.999  45.171  1.00 62.32           C
ATOM   2047  O   LEU A 255      -1.879  -8.800  45.128  1.00 62.32           O
ATOM   2048  N   PHE A 256      -1.127  -6.676  45.395  1.00 59.27           N
ATOM   2049  CA  PHE A 256      -2.421  -6.078  45.603  1.00 59.27           C
ATOM   2050  CB  PHE A 256      -2.569  -5.312  46.932  1.00 59.27           C
ATOM   2051  CG  PHE A 256      -2.539  -6.228  48.106  1.00 59.27           C
ATOM   2052  CD1 PHE A 256      -3.685  -6.864  48.531  1.00 59.27           C
ATOM   2053  CD2 PHE A 256      -1.365  -6.435  48.790  1.00 59.27           C
ATOM   2054  CE1 PHE A 256      -3.652  -7.700  49.622  1.00 59.27           C
ATOM   2055  CE2 PHE A 256      -1.329  -7.268  49.880  1.00 59.27           C
ATOM   2056  CZ  PHE A 256      -2.474  -7.903  50.297  1.00 59.27           C
ATOM   2057  C   PHE A 256      -2.601  -5.008  44.563  1.00 59.27           C
ATOM   2058  O   PHE A 256      -1.631  -4.471  44.027  1.00 59.27           O
ATOM   2059  N   ILE A 257      -3.874  -4.672  44.260  1.00133.55           N
ATOM   2060  CA  ILE A 257      -4.207  -3.677  43.277  1.00133.55           C
ATOM   2061  CB  ILE A 257      -4.920  -4.253  42.091  1.00133.55           C
ATOM   2062  CG1 ILE A 257      -5.286  -3.145  41.087  1.00133.55           C
ATOM   2063  CG2 ILE A 257      -6.139  -5.029  42.620  1.00133.55           C
ATOM   2064  CD1 ILE A 257      -4.087  -2.410  40.496  1.00133.55           C
ATOM   2065  C   ILE A 257      -5.153  -2.673  43.862  1.00133.55           C
ATOM   2066  O   ILE A 257      -6.091  -3.023  44.576  1.00133.55           O
ATOM   2067  N   GLN A 258      -4.911  -1.380  43.561  1.00 54.97           N
ATOM   2068  CA  GLN A 258      -5.783  -0.307  43.960  1.00 54.97           C
ATOM   2069  CB  GLN A 258      -5.042   0.879  44.601  1.00 54.97           C
ATOM   2070  CG  GLN A 258      -4.415   0.566  45.961  1.00 54.97           C
ATOM   2071  CD  GLN A 258      -3.715   1.829  46.445  1.00 54.97           C
ATOM   2072  OE1 GLN A 258      -2.687   2.227  45.903  1.00 54.97           O
ATOM   2073  NE2 GLN A 258      -4.289   2.484  47.489  1.00 54.97           N
ATOM   2074  C   GLN A 258      -6.425   0.207  42.704  1.00 54.97           C
ATOM   2075  O   GLN A 258      -5.740   0.478  41.717  1.00 54.97           O
ATOM   2076  N   THR A 259      -7.768   0.365  42.714  1.00 45.25           N
ATOM   2077  CA  THR A 259      -8.479   0.757  41.524  1.00 45.25           C
ATOM   2078  CB  THR A 259      -9.529  -0.244  41.134  1.00 45.25           C
ATOM   2079  OG1 THR A 259      -8.939  -1.519  40.927  1.00 45.25           O
ATOM   2080  CG2 THR A 259     -10.222   0.234  39.848  1.00 45.25           C
ATOM   2081  C   THR A 259      -9.197   2.053  41.747  1.00 45.25           C
ATOM   2082  O   THR A 259      -9.925   2.222  42.725  1.00 45.25           O
ATOM   2083  N   ILE A 260      -9.000   3.017  40.824  1.00 92.59           N
ATOM   2084  CA  ILE A 260      -9.687   4.268  40.931  1.00 92.59           C
ATOM   2085  CB  ILE A 260      -8.786   5.376  41.410  1.00 92.59           C
ATOM   2086  CG1 ILE A 260      -9.605   6.558  41.952  1.00 92.59           C
ATOM   2087  CG2 ILE A 260      -7.804   5.741  40.286  1.00 92.59           C
ATOM   2088  CD1 ILE A 260      -8.775   7.517  42.806  1.00 92.59           C
ATOM   2089  C   ILE A 260     -10.266   4.589  39.582  1.00 92.59           C
ATOM   2090  O   ILE A 260      -9.576   4.555  38.564  1.00 92.59           O
ATOM   2091  N   ASP A 261     -11.575   4.905  39.548  1.00 64.70           N
ATOM   2092  CA  ASP A 261     -12.281   5.197  38.328  1.00 64.70           C
ATOM   2093  CB  ASP A 261     -13.801   5.315  38.576  1.00 64.70           C
ATOM   2094  CG  ASP A 261     -14.557   5.489  37.267  1.00 64.70           C
ATOM   2095  OD1 ASP A 261     -14.240   6.444  36.512  1.00 64.70           O
ATOM   2096  OD2 ASP A 261     -15.484   4.676  37.012  1.00 64.70           O
ATOM   2097  C   ASP A 261     -11.774   6.508  37.801  1.00 64.70           C
ATOM   2098  O   ASP A 261     -11.473   7.420  38.568  1.00 64.70           O
ATOM   2099  N   PRO A 262     -11.666   6.625  36.504  1.00 78.13           N
ATOM   2100  CA  PRO A 262     -11.169   7.843  35.915  1.00 78.13           C
ATOM   2101  CD  PRO A 262     -11.377   5.466  35.672  1.00 78.13           C
ATOM   2102  CB  PRO A 262     -10.936   7.518  34.440  1.00 78.13           C
ATOM   2103  CG  PRO A 262     -10.615   6.012  34.452  1.00 78.13           C
ATOM   2104  C   PRO A 262     -12.014   9.058  36.152  1.00 78.13           C
ATOM   2105  O   PRO A 262     -11.475  10.163  36.173  1.00 78.13           O
ATOM   2106  N   ALA A 263     -13.336   8.888  36.309  1.00 56.18           N
ATOM   2107  CA  ALA A 263     -14.222   9.999  36.508  1.00 56.18           C
ATOM   2108  CB  ALA A 263     -15.703   9.588  36.526  1.00 56.18           C
ATOM   2109  C   ALA A 263     -13.926  10.671  37.818  1.00 56.18           C
ATOM   2110  O   ALA A 263     -13.975  11.896  37.916  1.00 56.18           O
ATOM   2111  N   ASP A 264     -13.612   9.864  38.850  1.00149.85           N
ATOM   2112  CA  ASP A 264     -13.454  10.257  40.229  1.00149.85           C
ATOM   2113  CB  ASP A 264     -13.635   9.103  41.235  1.00149.85           C
ATOM   2114  CG  ASP A 264     -12.582   8.034  41.023  1.00149.85           C
ATOM   2115  OD1 ASP A 264     -11.377   8.388  40.926  1.00149.85           O
ATOM   2116  OD2 ASP A 264     -12.973   6.837  40.981  1.00149.85           O
ATOM   2117  C   ASP A 264     -12.200  11.030  40.552  1.00149.85           C
ATOM   2118  O   ASP A 264     -12.038  11.470  41.687  1.00149.85           O
ATOM   2119  N   GLU A 265     -11.272  11.216  39.596  1.00147.16           N
ATOM   2120  CA  GLU A 265      -9.963  11.766  39.853  1.00147.16           C
ATOM   2121  CB  GLU A 265      -9.140  11.908  38.561  1.00147.16           C
ATOM   2122  CG  GLU A 265      -9.033  10.606  37.755  1.00147.16           C
ATOM   2123  CD  GLU A 265      -8.442   9.493  38.612  1.00147.16           C
ATOM   2124  OE1 GLU A 265      -7.189   9.443  38.746  1.00147.16           O
ATOM   2125  OE2 GLU A 265      -9.237   8.667  39.133  1.00147.16           O
ATOM   2126  C   GLU A 265     -10.001  13.114  40.539  1.00147.16           C
ATOM   2127  O   GLU A 265      -9.102  13.434  41.317  1.00147.16           O
ATOM   2128  N   ASP A 266     -11.016  13.947  40.253  1.00111.45           N
ATOM   2129  CA  ASP A 266     -11.189  15.280  40.782  1.00111.45           C
ATOM   2130  CB  ASP A 266     -12.362  15.997  40.090  1.00111.45           C
ATOM   2131  CG  ASP A 266     -12.401  17.455  40.519  1.00111.45           C
ATOM   2132  OD1 ASP A 266     -12.825  17.743  41.669  1.00111.45           O
ATOM   2133  OD2 ASP A 266     -12.002  18.311  39.685  1.00111.45           O
ATOM   2134  C   ASP A 266     -11.473  15.260  42.263  1.00111.45           C
ATOM   2135  O   ASP A 266     -11.246  16.247  42.961  1.00111.45           O
ATOM   2136  N   LYS A 267     -11.969  14.124  42.778  1.00156.50           N
ATOM   2137  CA  LYS A 267     -12.502  13.963  44.106  1.00156.50           C
ATOM   2138  CB  LYS A 267     -13.054  12.537  44.312  1.00156.50           C
ATOM   2139  CG  LYS A 267     -13.692  12.244  45.674  1.00156.50           C
ATOM   2140  CD  LYS A 267     -12.708  12.092  46.837  1.00156.50           C
ATOM   2141  CE  LYS A 267     -13.390  11.631  48.128  1.00156.50           C
ATOM   2142  NZ  LYS A 267     -12.397  11.039  49.051  1.00156.50           N
ATOM   2143  C   LYS A 267     -11.538  14.290  45.217  1.00156.50           C
ATOM   2144  O   LYS A 267     -11.977  14.684  46.296  1.00156.50           O
ATOM   2145  N   PHE A 268     -10.217  14.134  45.022  1.00 86.27           N
ATOM   2146  CA  PHE A 268      -9.293  14.282  46.115  1.00 86.27           C
ATOM   2147  CB  PHE A 268      -8.115  13.302  45.999  1.00 86.27           C
ATOM   2148  CG  PHE A 268      -8.726  11.955  45.836  1.00 86.27           C
ATOM   2149  CD1 PHE A 268      -9.016  11.484  44.576  1.00 86.27           C
ATOM   2150  CD2 PHE A 268      -9.028  11.173  46.926  1.00 86.27           C
ATOM   2151  CE1 PHE A 268      -9.586  10.246  44.401  1.00 86.27           C
ATOM   2152  CE2 PHE A 268      -9.599   9.933  46.756  1.00 86.27           C
ATOM   2153  CZ  PHE A 268      -9.878   9.466  45.494  1.00 86.27           C
ATOM   2154  C   PHE A 268      -8.708  15.668  46.171  1.00 86.27           C
ATOM   2155  O   PHE A 268      -8.910  16.506  45.294  1.00 86.27           O
ATOM   2156  N   ASP A 269      -8.008  15.932  47.297  1.00145.33           N
ATOM   2157  CA  ASP A 269      -7.285  17.132  47.622  1.00145.33           C
ATOM   2158  CB  ASP A 269      -6.766  17.148  49.066  1.00145.33           C
ATOM   2159  CG  ASP A 269      -7.962  17.273  49.985  1.00145.33           C
ATOM   2160  OD1 ASP A 269      -9.015  17.775  49.511  1.00145.33           O
ATOM   2161  OD2 ASP A 269      -7.842  16.869  51.172  1.00145.33           O
ATOM   2162  C   ASP A 269      -6.071  17.184  46.758  1.00145.33           C
ATOM   2163  O   ASP A 269      -5.405  18.215  46.657  1.00145.33           O
ATOM   2164  N   PHE A 270      -5.692  16.019  46.202  1.00 67.15           N
ATOM   2165  CA  PHE A 270      -4.519  15.959  45.389  1.00 67.15           C
ATOM   2166  CB  PHE A 270      -3.398  15.131  46.030  1.00 67.15           C
ATOM   2167  CG  PHE A 270      -3.929  13.749  46.193  1.00 67.15           C
ATOM   2168  CD1 PHE A 270      -4.723  13.424  47.269  1.00 67.15           C
ATOM   2169  CD2 PHE A 270      -3.629  12.776  45.269  1.00 67.15           C
ATOM   2170  CE1 PHE A 270      -5.211  12.148  47.416  1.00 67.15           C
ATOM   2171  CE2 PHE A 270      -4.114  11.498  45.411  1.00 67.15           C
ATOM   2172  CZ  PHE A 270      -4.907  11.183  46.486  1.00 67.15           C
ATOM   2173  C   PHE A 270      -4.857  15.331  44.070  1.00 67.15           C
ATOM   2174  O   PHE A 270      -5.930  14.758  43.886  1.00 67.15           O
ATOM   2175  N   ASP A 271      -3.929  15.466  43.098  1.00100.88           N
ATOM   2176  CA  ASP A 271      -4.058  14.912  41.779  1.00100.88           C
ATOM   2177  CB  ASP A 271      -3.237  15.721  40.750  1.00100.88           C
ATOM   2178  CG  ASP A 271      -3.514  15.231  39.336  1.00100.88           C
ATOM   2179  OD1 ASP A 271      -3.509  13.990  39.124  1.00100.88           O
ATOM   2180  OD2 ASP A 271      -3.716  16.097  38.442  1.00100.88           O
ATOM   2181  C   ASP A 271      -3.514  13.506  41.836  1.00100.88           C
ATOM   2182  O   ASP A 271      -2.324  13.297  42.065  1.00100.88           O
ATOM   2183  N   PRO A 272      -4.367  12.536  41.619  1.00103.47           N
ATOM   2184  CA  PRO A 272      -4.047  11.125  41.716  1.00103.47           C
ATOM   2185  CD  PRO A 272      -5.640  12.780  40.965  1.00103.47           C
ATOM   2186  CB  PRO A 272      -5.352  10.407  41.368  1.00103.47           C
ATOM   2187  CG  PRO A 272      -6.085  11.405  40.450  1.00103.47           C
ATOM   2188  C   PRO A 272      -2.911  10.692  40.817  1.00103.47           C
ATOM   2189  O   PRO A 272      -2.332   9.632  41.063  1.00103.47           O
ATOM   2190  N   LEU A 273      -2.664  11.431  39.718  1.00167.62           N
ATOM   2191  CA  LEU A 273      -1.601  11.245  38.761  1.00167.62           C
ATOM   2192  CB  LEU A 273      -1.847  11.899  37.387  1.00167.62           C
ATOM   2193  CG  LEU A 273      -2.973  11.237  36.559  1.00167.62           C
ATOM   2194  CD1 LEU A 273      -2.725   9.729  36.380  1.00167.62           C
ATOM   2195  CD2 LEU A 273      -4.371  11.568  37.100  1.00167.62           C
ATOM   2196  C   LEU A 273      -0.272  11.739  39.280  1.00167.62           C
ATOM   2197  O   LEU A 273       0.758  11.512  38.645  1.00167.62           O
ATOM   2198  N   ASP A 274      -0.269  12.551  40.359  1.00 89.65           N
ATOM   2199  CA  ASP A 274       0.947  13.107  40.906  1.00 89.65           C
ATOM   2200  CB  ASP A 274       0.655  14.271  41.876  1.00 89.65           C
ATOM   2201  CG  ASP A 274       1.942  14.975  42.285  1.00 89.65           C
ATOM   2202  OD1 ASP A 274       3.045  14.513  41.891  1.00 89.65           O
ATOM   2203  OD2 ASP A 274       1.826  16.006  43.000  1.00 89.65           O
ATOM   2204  C   ASP A 274       1.715  12.034  41.656  1.00 89.65           C
ATOM   2205  O   ASP A 274       1.212  11.426  42.597  1.00 89.65           O
ATOM   2206  N   VAL A 275       2.989  11.810  41.257  1.00 85.73           N
ATOM   2207  CA  VAL A 275       3.913  10.812  41.768  1.00 85.73           C
ATOM   2208  CB  VAL A 275       5.216  10.792  41.005  1.00 85.73           C
ATOM   2209  CG1 VAL A 275       6.170   9.745  41.605  1.00 85.73           C
ATOM   2210  CG2 VAL A 275       4.915  10.536  39.528  1.00 85.73           C
ATOM   2211  C   VAL A 275       4.284  11.086  43.205  1.00 85.73           C
ATOM   2212  O   VAL A 275       4.791  10.219  43.919  1.00 85.73           O
ATOM   2213  N   THR A 276       4.150  12.349  43.620  1.00158.86           N
ATOM   2214  CA  THR A 276       4.430  12.831  44.941  1.00158.86           C
ATOM   2215  CB  THR A 276       4.362  14.327  44.985  1.00158.86           C
ATOM   2216  OG1 THR A 276       5.216  14.884  44.000  1.00158.86           O
ATOM   2217  CG2 THR A 276       4.801  14.796  46.377  1.00158.86           C
ATOM   2218  C   THR A 276       3.358  12.343  45.883  1.00158.86           C
ATOM   2219  O   THR A 276       3.485  12.497  47.100  1.00158.86           O
ATOM   2220  N   LYS A 277       2.238  11.820  45.339  1.00147.53           N
ATOM   2221  CA  LYS A 277       1.094  11.486  46.151  1.00147.53           C
ATOM   2222  CB  LYS A 277      -0.195  12.041  45.528  1.00147.53           C
ATOM   2223  CG  LYS A 277      -0.162  13.561  45.333  1.00147.53           C
ATOM   2224  CD  LYS A 277      -0.108  14.348  46.644  1.00147.53           C
ATOM   2225  CE  LYS A 277       0.056  15.855  46.445  1.00147.53           C
ATOM   2226  NZ  LYS A 277       1.477  16.174  46.184  1.00147.53           N
ATOM   2227  C   LYS A 277       0.902  10.001  46.311  1.00147.53           C
ATOM   2228  O   LYS A 277       1.206   9.208  45.420  1.00147.53           O
ATOM   2229  N   THR A 278       0.346   9.592  47.475  1.00121.64           N
ATOM   2230  CA  THR A 278       0.090   8.201  47.728  1.00121.64           C
ATOM   2231  CB  THR A 278       0.703   7.693  48.996  1.00121.64           C
ATOM   2232  OG1 THR A 278       0.159   8.383  50.109  1.00121.64           O
ATOM   2233  CG2 THR A 278       2.226   7.899  48.927  1.00121.64           C
ATOM   2234  C   THR A 278      -1.390   8.000  47.815  1.00121.64           C
ATOM   2235  O   THR A 278      -2.145   8.958  47.971  1.00121.64           O
ATOM   2236  N   TRP A 279      -1.845   6.739  47.646  1.00 92.24           N
ATOM   2237  CA  TRP A 279      -3.238   6.419  47.758  1.00 92.24           C
ATOM   2238  CB  TRP A 279      -3.763   5.514  46.632  1.00 92.24           C
ATOM   2239  CG  TRP A 279      -3.729   6.102  45.241  1.00 92.24           C
ATOM   2240  CD2 TRP A 279      -4.369   5.479  44.115  1.00 92.24           C
ATOM   2241  CD1 TRP A 279      -3.134   7.235  44.772  1.00 92.24           C
ATOM   2242  NE1 TRP A 279      -3.353   7.352  43.417  1.00 92.24           N
ATOM   2243  CE2 TRP A 279      -4.112   6.278  43.002  1.00 92.24           C
ATOM   2244  CE3 TRP A 279      -5.104   4.335  44.018  1.00 92.24           C
ATOM   2245  CZ2 TRP A 279      -4.591   5.939  41.769  1.00 92.24           C
ATOM   2246  CZ3 TRP A 279      -5.590   3.997  42.775  1.00 92.24           C
ATOM   2247  CH2 TRP A 279      -5.335   4.784  41.673  1.00 92.24           C
ATOM   2248  C   TRP A 279      -3.334   5.609  49.005  1.00 92.24           C
ATOM   2249  O   TRP A 279      -2.927   4.446  49.034  1.00 92.24           O
ATOM   2250  N   PRO A 280      -3.893   6.192  50.028  1.00123.48           N
ATOM   2251  CA  PRO A 280      -3.962   5.498  51.279  1.00123.48           C
ATOM   2252  CD  PRO A 280      -3.806   7.632  50.211  1.00123.48           C
ATOM   2253  CB  PRO A 280      -4.400   6.539  52.306  1.00123.48           C
ATOM   2254  CG  PRO A 280      -3.834   7.852  51.735  1.00123.48           C
ATOM   2255  C   PRO A 280      -4.845   4.309  51.168  1.00123.48           C
ATOM   2256  O   PRO A 280      -5.845   4.362  50.454  1.00123.48           O
ATOM   2257  N   GLU A 281      -4.485   3.228  51.875  1.00 37.79           N
ATOM   2258  CA  GLU A 281      -5.244   2.021  51.806  1.00 37.79           C
ATOM   2259  CB  GLU A 281      -4.618   0.874  52.612  1.00 37.79           C
ATOM   2260  CG  GLU A 281      -5.243  -0.485  52.293  1.00 37.79           C
ATOM   2261  CD  GLU A 281      -4.374  -1.559  52.926  1.00 37.79           C
ATOM   2262  OE1 GLU A 281      -3.701  -1.253  53.946  1.00 37.79           O
ATOM   2263  OE2 GLU A 281      -4.376  -2.703  52.400  1.00 37.79           O
ATOM   2264  C   GLU A 281      -6.592   2.327  52.358  1.00 37.79           C
ATOM   2265  O   GLU A 281      -7.597   1.769  51.921  1.00 37.79           O
ATOM   2266  N   ASP A 282      -6.645   3.241  53.344  1.00 44.65           N
ATOM   2267  CA  ASP A 282      -7.907   3.557  53.934  1.00 44.65           C
ATOM   2268  CB  ASP A 282      -7.811   4.635  55.028  1.00 44.65           C
ATOM   2269  CG  ASP A 282      -7.116   4.030  56.242  1.00 44.65           C
ATOM   2270  OD1 ASP A 282      -6.141   3.254  56.048  1.00 44.65           O
ATOM   2271  OD2 ASP A 282      -7.567   4.317  57.382  1.00 44.65           O
ATOM   2272  C   ASP A 282      -8.820   4.077  52.866  1.00 44.65           C
ATOM   2273  O   ASP A 282      -9.966   3.641  52.766  1.00 44.65           O
ATOM   2274  N   ILE A 283      -8.347   5.041  52.048  1.00132.45           N
ATOM   2275  CA  ILE A 283      -9.185   5.606  51.027  1.00132.45           C
ATOM   2276  CB  ILE A 283      -8.700   6.940  50.549  1.00132.45           C
ATOM   2277  CG1 ILE A 283      -8.732   7.902  51.748  1.00132.45           C
ATOM   2278  CG2 ILE A 283      -9.589   7.411  49.385  1.00132.45           C
ATOM   2279  CD1 ILE A 283      -8.095   9.261  51.476  1.00132.45           C
ATOM   2280  C   ILE A 283      -9.415   4.658  49.880  1.00132.45           C
ATOM   2281  O   ILE A 283     -10.548   4.532  49.417  1.00132.45           O
ATOM   2282  N   LEU A 284      -8.363   3.975  49.370  1.00101.96           N
ATOM   2283  CA  LEU A 284      -8.569   3.051  48.278  1.00101.96           C
ATOM   2284  CB  LEU A 284      -7.803   3.405  46.988  1.00101.96           C
ATOM   2285  CG  LEU A 284      -8.239   4.717  46.305  1.00101.96           C
ATOM   2286  CD1 LEU A 284      -9.727   4.683  45.932  1.00101.96           C
ATOM   2287  CD2 LEU A 284      -7.829   5.959  47.109  1.00101.96           C
ATOM   2288  C   LEU A 284      -8.088   1.687  48.695  1.00101.96           C
ATOM   2289  O   LEU A 284      -6.901   1.481  48.943  1.00101.96           O
ATOM   2290  N   PRO A 285      -8.977   0.726  48.703  1.00 65.29           N
ATOM   2291  CA  PRO A 285      -8.646  -0.592  49.191  1.00 65.29           C
ATOM   2292  CD  PRO A 285     -10.387   1.034  48.879  1.00 65.29           C
ATOM   2293  CB  PRO A 285      -9.983  -1.312  49.364  1.00 65.29           C
ATOM   2294  CG  PRO A 285     -10.985  -0.173  49.619  1.00 65.29           C
ATOM   2295  C   PRO A 285      -7.685  -1.358  48.335  1.00 65.29           C
ATOM   2296  O   PRO A 285      -7.618  -1.110  47.133  1.00 65.29           O
ATOM   2297  N   LEU A 286      -6.920  -2.286  48.950  1.00 44.90           N
ATOM   2298  CA  LEU A 286      -6.013  -3.122  48.223  1.00 44.90           C
ATOM   2299  CB  LEU A 286      -4.725  -3.453  49.000  1.00 44.90           C
ATOM   2300  CG  LEU A 286      -3.857  -2.210  49.272  1.00 44.90           C
ATOM   2301  CD1 LEU A 286      -2.580  -2.569  50.048  1.00 44.90           C
ATOM   2302  CD2 LEU A 286      -3.572  -1.441  47.972  1.00 44.90           C
ATOM   2303  C   LEU A 286      -6.754  -4.393  47.965  1.00 44.90           C
ATOM   2304  O   LEU A 286      -7.464  -4.892  48.836  1.00 44.90           O
ATOM   2305  N   GLN A 287      -6.637  -4.926  46.731  1.00 60.80           N
ATOM   2306  CA  GLN A 287      -7.339  -6.128  46.373  1.00 60.80           C
ATOM   2307  CB  GLN A 287      -8.292  -5.882  45.196  1.00 60.80           C
ATOM   2308  CG  GLN A 287      -9.324  -4.798  45.524  1.00 60.80           C
ATOM   2309  CD  GLN A 287     -10.088  -4.444  44.258  1.00 60.80           C
ATOM   2310  OE1 GLN A 287      -9.611  -3.678  43.421  1.00 60.80           O
ATOM   2311  NE2 GLN A 287     -11.316  -5.010  44.116  1.00 60.80           N
ATOM   2312  C   GLN A 287      -6.298  -7.118  45.949  1.00 60.80           C
ATOM   2313  O   GLN A 287      -5.472  -6.811  45.093  1.00 60.80           O
ATOM   2314  N   PRO A 288      -6.299  -8.297  46.521  1.00105.13           N
ATOM   2315  CA  PRO A 288      -5.261  -9.245  46.196  1.00105.13           C
ATOM   2316  CD  PRO A 288      -6.770  -8.473  47.882  1.00105.13           C
ATOM   2317  CB  PRO A 288      -5.227 -10.264  47.340  1.00105.13           C
ATOM   2318  CG  PRO A 288      -6.486  -9.956  48.176  1.00105.13           C
ATOM   2319  C   PRO A 288      -5.300  -9.843  44.823  1.00105.13           C
ATOM   2320  O   PRO A 288      -6.358 -10.322  44.420  1.00105.13           O
ATOM   2321  N   VAL A 289      -4.186  -9.721  44.059  1.00 79.70           N
ATOM   2322  CA  VAL A 289      -4.003 -10.353  42.778  1.00 79.70           C
ATOM   2323  CB  VAL A 289      -3.098  -9.575  41.871  1.00 79.70           C
ATOM   2324  CG1 VAL A 289      -2.849 -10.402  40.595  1.00 79.70           C
ATOM   2325  CG2 VAL A 289      -3.751  -8.208  41.598  1.00 79.70           C
ATOM   2326  C   VAL A 289      -3.440 -11.747  42.874  1.00 79.70           C
ATOM   2327  O   VAL A 289      -3.983 -12.690  42.298  1.00 79.70           O
ATOM   2328  N   GLY A 290      -2.327 -11.915  43.631  1.00 34.41           N
ATOM   2329  CA  GLY A 290      -1.636 -13.181  43.663  1.00 34.41           C
ATOM   2330  C   GLY A 290      -0.365 -13.039  44.453  1.00 34.41           C
ATOM   2331  O   GLY A 290      -0.202 -12.079  45.207  1.00 34.41           O
ATOM   2332  N   ARG A 291       0.571 -14.013  44.301  1.00132.64           N
ATOM   2333  CA  ARG A 291       1.779 -13.990  45.087  1.00132.64           C
ATOM   2334  CB  ARG A 291       1.760 -15.013  46.232  1.00132.64           C
ATOM   2335  CG  ARG A 291       0.546 -14.932  47.157  1.00132.64           C
ATOM   2336  CD  ARG A 291       0.545 -16.069  48.176  1.00132.64           C
ATOM   2337  NE  ARG A 291      -0.689 -15.967  49.000  1.00132.64           N
ATOM   2338  CZ  ARG A 291      -0.684 -16.494  50.260  1.00132.64           C
ATOM   2339  NH1 ARG A 291       0.460 -17.055  50.750  1.00132.64           N
ATOM   2340  NH2 ARG A 291      -1.812 -16.454  51.027  1.00132.64           N
ATOM   2341  C   ARG A 291       2.968 -14.389  44.253  1.00132.64           C
ATOM   2342  O   ARG A 291       2.874 -15.225  43.355  1.00132.64           O
ATOM   2343  N   LEU A 292       4.145 -13.798  44.552  1.00106.04           N
ATOM   2344  CA  LEU A 292       5.352 -14.171  43.862  1.00106.04           C
ATOM   2345  CB  LEU A 292       6.185 -13.004  43.308  1.00106.04           C
ATOM   2346  CG  LEU A 292       5.523 -12.302  42.124  1.00106.04           C
ATOM   2347  CD1 LEU A 292       4.179 -11.725  42.565  1.00106.04           C
ATOM   2348  CD2 LEU A 292       6.458 -11.268  41.474  1.00106.04           C
ATOM   2349  C   LEU A 292       6.246 -14.877  44.823  1.00106.04           C
ATOM   2350  O   LEU A 292       6.361 -14.485  45.984  1.00106.04           O
ATOM   2351  N   VAL A 293       6.879 -15.970  44.352  1.00105.52           N
ATOM   2352  CA  VAL A 293       7.839 -16.651  45.164  1.00105.52           C
ATOM   2353  CB  VAL A 293       7.425 -18.032  45.590  1.00105.52           C
ATOM   2354  CG1 VAL A 293       7.344 -18.939  44.353  1.00105.52           C
ATOM   2355  CG2 VAL A 293       8.414 -18.515  46.666  1.00105.52           C
ATOM   2356  C   VAL A 293       9.106 -16.743  44.369  1.00105.52           C
ATOM   2357  O   VAL A 293       9.101 -17.116  43.196  1.00105.52           O
ATOM   2358  N   LEU A 294      10.240 -16.375  44.999  1.00 98.07           N
ATOM   2359  CA  LEU A 294      11.521 -16.410  44.344  1.00 98.07           C
ATOM   2360  CB  LEU A 294      12.405 -15.230  44.784  1.00 98.07           C
ATOM   2361  CG  LEU A 294      11.705 -13.859  44.673  1.00 98.07           C
ATOM   2362  CD1 LEU A 294      12.626 -12.724  45.121  1.00 98.07           C
ATOM   2363  CD2 LEU A 294      11.128 -13.601  43.277  1.00 98.07           C
ATOM   2364  C   LEU A 294      12.198 -17.657  44.840  1.00 98.07           C
ATOM   2365  O   LEU A 294      12.600 -17.724  46.003  1.00 98.07           O
ATOM   2366  N   ASN A 295      12.361 -18.687  43.980  1.00125.00           N
ATOM   2367  CA  ASN A 295      12.918 -19.893  44.529  1.00125.00           C
ATOM   2368  CB  ASN A 295      11.909 -21.055  44.571  1.00125.00           C
ATOM   2369  CG  ASN A 295      11.485 -21.375  43.151  1.00125.00           C
ATOM   2370  OD1 ASN A 295      10.905 -20.543  42.457  1.00125.00           O
ATOM   2371  ND2 ASN A 295      11.789 -22.617  42.693  1.00125.00           N
ATOM   2372  C   ASN A 295      14.132 -20.376  43.785  1.00125.00           C
ATOM   2373  O   ASN A 295      14.521 -21.532  43.951  1.00125.00           O
ATOM   2374  N   LYS A 296      14.788 -19.530  42.963  1.00102.97           N
ATOM   2375  CA  LYS A 296      15.993 -19.997  42.331  1.00102.97           C
ATOM   2376  CB  LYS A 296      15.838 -20.549  40.901  1.00102.97           C
ATOM   2377  CG  LYS A 296      17.190 -20.966  40.301  1.00102.97           C
ATOM   2378  CD  LYS A 296      17.114 -21.769  38.999  1.00102.97           C
ATOM   2379  CE  LYS A 296      18.457 -21.870  38.269  1.00102.97           C
ATOM   2380  NZ  LYS A 296      19.447 -22.594  39.100  1.00102.97           N
ATOM   2381  C   LYS A 296      16.942 -18.852  42.204  1.00102.97           C
ATOM   2382  O   LYS A 296      16.581 -17.771  41.741  1.00102.97           O
ATOM   2383  N   ASN A 297      18.204 -19.078  42.607  1.00 57.88           N
ATOM   2384  CA  ASN A 297      19.196 -18.060  42.450  1.00 57.88           C
ATOM   2385  CB  ASN A 297      20.469 -18.267  43.291  1.00 57.88           C
ATOM   2386  CG  ASN A 297      20.162 -17.983  44.752  1.00 57.88           C
ATOM   2387  OD1 ASN A 297      19.222 -17.260  45.076  1.00 57.88           O
ATOM   2388  ND2 ASN A 297      20.991 -18.557  45.666  1.00 57.88           N
ATOM   2389  C   ASN A 297      19.631 -18.070  41.019  1.00 57.88           C
ATOM   2390  O   ASN A 297      19.315 -18.974  40.248  1.00 57.88           O
ATOM   2391  N   ILE A 298      20.365 -17.012  40.643  1.00166.38           N
ATOM   2392  CA  ILE A 298      20.944 -16.788  39.353  1.00166.38           C
ATOM   2393  CB  ILE A 298      21.534 -15.403  39.336  1.00166.38           C
ATOM   2394  CG1 ILE A 298      21.955 -14.904  37.950  1.00166.38           C
ATOM   2395  CG2 ILE A 298      22.669 -15.398  40.372  1.00166.38           C
ATOM   2396  CD1 ILE A 298      22.210 -13.394  37.941  1.00166.38           C
ATOM   2397  C   ILE A 298      22.050 -17.786  39.160  1.00166.38           C
ATOM   2398  O   ILE A 298      22.703 -18.197  40.120  1.00166.38           O
ATOM   2399  N   ASP A 299      22.173 -18.313  37.922  1.00 59.44           N
ATOM   2400  CA  ASP A 299      23.268 -19.157  37.527  1.00 59.44           C
ATOM   2401  CB  ASP A 299      23.001 -19.860  36.189  1.00 59.44           C
ATOM   2402  CG  ASP A 299      21.934 -20.923  36.402  1.00 59.44           C
ATOM   2403  OD1 ASP A 299      21.977 -21.599  37.466  1.00 59.44           O
ATOM   2404  OD2 ASP A 299      21.062 -21.070  35.504  1.00 59.44           O
ATOM   2405  C   ASP A 299      24.489 -18.299  37.351  1.00 59.44           C
ATOM   2406  O   ASP A 299      25.594 -18.686  37.731  1.00 59.44           O
ATOM   2407  N   ASN A 300      24.312 -17.102  36.743  1.00 70.57           N
ATOM   2408  CA  ASN A 300      25.412 -16.209  36.485  1.00 70.57           C
ATOM   2409  CB  ASN A 300      25.944 -16.350  35.044  1.00 70.57           C
ATOM   2410  CG  ASN A 300      27.128 -15.415  34.828  1.00 70.57           C
ATOM   2411  OD1 ASN A 300      27.008 -14.390  34.159  1.00 70.57           O
ATOM   2412  ND2 ASN A 300      28.307 -15.776  35.402  1.00 70.57           N
ATOM   2413  C   ASN A 300      24.910 -14.803  36.666  1.00 70.57           C
ATOM   2414  O   ASN A 300      23.926 -14.390  36.055  1.00 70.57           O
ATOM   2415  N   PHE A 301      25.620 -14.030  37.508  1.00 75.61           N
ATOM   2416  CA  PHE A 301      25.266 -12.698  37.919  1.00 75.61           C
ATOM   2417  CB  PHE A 301      26.290 -12.223  38.962  1.00 75.61           C
ATOM   2418  CG  PHE A 301      25.806 -11.037  39.711  1.00 75.61           C
ATOM   2419  CD1 PHE A 301      24.937 -11.206  40.763  1.00 75.61           C
ATOM   2420  CD2 PHE A 301      26.236  -9.771  39.392  1.00 75.61           C
ATOM   2421  CE1 PHE A 301      24.485 -10.126  41.482  1.00 75.61           C
ATOM   2422  CE2 PHE A 301      25.788  -8.687  40.107  1.00 75.61           C
ATOM   2423  CZ  PHE A 301      24.909  -8.862  41.151  1.00 75.61           C
ATOM   2424  C   PHE A 301      25.299 -11.737  36.762  1.00 75.61           C
ATOM   2425  O   PHE A 301      24.333 -11.024  36.494  1.00 75.61           O
ATOM   2426  N   PHE A 302      26.416 -11.726  36.018  1.00119.31           N
ATOM   2427  CA  PHE A 302      26.629 -10.789  34.955  1.00119.31           C
ATOM   2428  CB  PHE A 302      28.008 -11.015  34.307  1.00119.31           C
ATOM   2429  CG  PHE A 302      28.182 -10.102  33.148  1.00119.31           C
ATOM   2430  CD1 PHE A 302      27.750 -10.475  31.896  1.00119.31           C
ATOM   2431  CD2 PHE A 302      28.782  -8.877  33.312  1.00119.31           C
ATOM   2432  CE1 PHE A 302      27.913  -9.635  30.821  1.00119.31           C
ATOM   2433  CE2 PHE A 302      28.948  -8.033  32.242  1.00119.31           C
ATOM   2434  CZ  PHE A 302      28.514  -8.412  30.994  1.00119.31           C
ATOM   2435  C   PHE A 302      25.581 -10.955  33.902  1.00119.31           C
ATOM   2436  O   PHE A 302      24.966  -9.982  33.467  1.00119.31           O
ATOM   2437  N   ALA A 303      25.367 -12.206  33.468  1.00 65.80           N
ATOM   2438  CA  ALA A 303      24.450 -12.508  32.410  1.00 65.80           C
ATOM   2439  CB  ALA A 303      24.497 -13.992  32.006  1.00 65.80           C
ATOM   2440  C   ALA A 303      23.035 -12.213  32.807  1.00 65.80           C
ATOM   2441  O   ALA A 303      22.253 -11.745  31.983  1.00 65.80           O
ATOM   2442  N   GLU A 304      22.617 -12.617  34.025  1.00 93.50           N
ATOM   2443  CA  GLU A 304      21.257 -12.371  34.423  1.00 93.50           C
ATOM   2444  CB  GLU A 304      20.743 -13.456  35.381  1.00 93.50           C
ATOM   2445  CG  GLU A 304      20.621 -14.821  34.701  1.00 93.50           C
ATOM   2446  CD  GLU A 304      20.237 -15.846  35.756  1.00 93.50           C
ATOM   2447  OE1 GLU A 304      19.506 -15.471  36.710  1.00 93.50           O
ATOM   2448  OE2 GLU A 304      20.692 -17.016  35.632  1.00 93.50           O
ATOM   2449  C   GLU A 304      20.994 -11.031  35.065  1.00 93.50           C
ATOM   2450  O   GLU A 304      20.288 -10.183  34.525  1.00 93.50           O
ATOM   2451  N   ASN A 305      21.618 -10.803  36.239  1.00114.30           N
ATOM   2452  CA  ASN A 305      21.407  -9.657  37.086  1.00114.30           C
ATOM   2453  CB  ASN A 305      22.220  -9.839  38.386  1.00114.30           C
ATOM   2454  CG  ASN A 305      22.147  -8.630  39.309  1.00114.30           C
ATOM   2455  OD1 ASN A 305      22.513  -7.515  38.940  1.00114.30           O
ATOM   2456  ND2 ASN A 305      21.694  -8.867  40.569  1.00114.30           N
ATOM   2457  C   ASN A 305      21.882  -8.401  36.428  1.00114.30           C
ATOM   2458  O   ASN A 305      21.173  -7.399  36.383  1.00114.30           O
ATOM   2459  N   GLU A 306      23.123  -8.408  35.918  1.00142.94           N
ATOM   2460  CA  GLU A 306      23.668  -7.202  35.368  1.00142.94           C
ATOM   2461  CB  GLU A 306      25.185  -7.267  35.131  1.00142.94           C
ATOM   2462  CG  GLU A 306      25.998  -7.140  36.419  1.00142.94           C
ATOM   2463  CD  GLU A 306      25.666  -5.786  37.039  1.00142.94           C
ATOM   2464  OE1 GLU A 306      25.864  -4.748  36.354  1.00142.94           O
ATOM   2465  OE2 GLU A 306      25.205  -5.772  38.211  1.00142.94           O
ATOM   2466  C   GLU A 306      23.022  -6.838  34.065  1.00142.94           C
ATOM   2467  O   GLU A 306      22.765  -5.670  33.786  1.00142.94           O
ATOM   2468  N   GLN A 307      22.780  -7.853  33.228  1.00121.44           N
ATOM   2469  CA  GLN A 307      22.311  -7.787  31.871  1.00121.44           C
ATOM   2470  CB  GLN A 307      22.536  -9.139  31.174  1.00121.44           C
ATOM   2471  CG  GLN A 307      22.097  -9.197  29.714  1.00121.44           C
ATOM   2472  CD  GLN A 307      22.302 -10.639  29.270  1.00121.44           C
ATOM   2473  OE1 GLN A 307      23.426 -11.130  29.179  1.00121.44           O
ATOM   2474  NE2 GLN A 307      21.176 -11.353  29.009  1.00121.44           N
ATOM   2475  C   GLN A 307      20.860  -7.418  31.711  1.00121.44           C
ATOM   2476  O   GLN A 307      20.479  -6.873  30.675  1.00121.44           O
ATOM   2477  N   LEU A 308      19.988  -7.756  32.678  1.00160.71           N
ATOM   2478  CA  LEU A 308      18.584  -7.531  32.466  1.00160.71           C
ATOM   2479  CB  LEU A 308      17.675  -8.185  33.528  1.00160.71           C
ATOM   2480  CG  LEU A 308      17.487  -7.401  34.843  1.00160.71           C
ATOM   2481  CD1 LEU A 308      16.870  -8.306  35.923  1.00160.71           C
ATOM   2482  CD2 LEU A 308      18.767  -6.694  35.299  1.00160.71           C
ATOM   2483  C   LEU A 308      18.281  -6.064  32.405  1.00160.71           C
ATOM   2484  O   LEU A 308      18.973  -5.231  32.990  1.00160.71           O
ATOM   2485  N   ALA A 309      17.246  -5.714  31.613  1.00 49.03           N
ATOM   2486  CA  ALA A 309      16.781  -4.363  31.520  1.00 49.03           C
ATOM   2487  CB  ALA A 309      17.069  -3.753  30.142  1.00 49.03           C
ATOM   2488  C   ALA A 309      15.287  -4.390  31.707  1.00 49.03           C
ATOM   2489  O   ALA A 309      14.603  -5.259  31.166  1.00 49.03           O
ATOM   2490  N   PHE A 310      14.743  -3.429  32.486  1.00 73.11           N
ATOM   2491  CA  PHE A 310      13.324  -3.358  32.737  1.00 73.11           C
ATOM   2492  CB  PHE A 310      12.953  -3.455  34.227  1.00 73.11           C
ATOM   2493  CG  PHE A 310      13.367  -4.761  34.817  1.00 73.11           C
ATOM   2494  CD1 PHE A 310      12.551  -5.866  34.734  1.00 73.11           C
ATOM   2495  CD2 PHE A 310      14.570  -4.873  35.475  1.00 73.11           C
ATOM   2496  CE1 PHE A 310      12.936  -7.062  35.292  1.00 73.11           C
ATOM   2497  CE2 PHE A 310      14.957  -6.066  36.034  1.00 73.11           C
ATOM   2498  CZ  PHE A 310      14.141  -7.165  35.943  1.00 73.11           C
ATOM   2499  C   PHE A 310      12.842  -1.988  32.334  1.00 73.11           C
ATOM   2500  O   PHE A 310      13.615  -1.031  32.309  1.00 73.11           O
ATOM   2501  N   CYS A 311      11.538  -1.872  31.989  1.00 68.89           N
ATOM   2502  CA  CYS A 311      10.942  -0.603  31.655  1.00 68.89           C
ATOM   2503  CB  CYS A 311      10.948  -0.323  30.141  1.00 68.89           C
ATOM   2504  SG  CYS A 311      10.322   1.329  29.722  1.00 68.89           S
ATOM   2505  C   CYS A 311       9.502  -0.655  32.105  1.00 68.89           C
ATOM   2506  O   CYS A 311       8.781  -1.581  31.743  1.00 68.89           O
ATOM   2507  N   PRO A 312       9.034   0.299  32.874  1.00 96.75           N
ATOM   2508  CA  PRO A 312       7.673   0.324  33.368  1.00 96.75           C
ATOM   2509  CD  PRO A 312       9.880   1.305  33.493  1.00 96.75           C
ATOM   2510  CB  PRO A 312       7.626   1.480  34.372  1.00 96.75           C
ATOM   2511  CG  PRO A 312       8.880   2.324  34.062  1.00 96.75           C
ATOM   2512  C   PRO A 312       6.679   0.452  32.252  1.00 96.75           C
ATOM   2513  O   PRO A 312       5.507   0.126  32.431  1.00 96.75           O
ATOM   2514  N   GLY A 313       7.130   1.019  31.132  1.00 89.99           N
ATOM   2515  CA  GLY A 313       6.433   1.227  29.901  1.00 89.99           C
ATOM   2516  C   GLY A 313       6.308  -0.043  29.131  1.00 89.99           C
ATOM   2517  O   GLY A 313       5.694  -0.038  28.066  1.00 89.99           O
ATOM   2518  N   ILE A 314       7.048  -1.103  29.521  1.00 73.74           N
ATOM   2519  CA  ILE A 314       6.904  -2.326  28.785  1.00 73.74           C
ATOM   2520  CB  ILE A 314       8.153  -3.148  28.731  1.00 73.74           C
ATOM   2521  CG1 ILE A 314       9.244  -2.324  28.023  1.00 73.74           C
ATOM   2522  CG2 ILE A 314       7.830  -4.462  28.002  1.00 73.74           C
ATOM   2523  CD1 ILE A 314      10.641  -2.934  28.106  1.00 73.74           C
ATOM   2524  C   ILE A 314       5.774  -3.077  29.415  1.00 73.74           C
ATOM   2525  O   ILE A 314       5.885  -3.666  30.490  1.00 73.74           O
ATOM   2526  N   VAL A 315       4.633  -3.063  28.700  1.00 62.07           N
ATOM   2527  CA  VAL A 315       3.379  -3.523  29.210  1.00 62.07           C
ATOM   2528  CB  VAL A 315       2.454  -2.358  29.308  1.00 62.07           C
ATOM   2529  CG1 VAL A 315       1.076  -2.873  29.667  1.00 62.07           C
ATOM   2530  CG2 VAL A 315       3.042  -1.327  30.285  1.00 62.07           C
ATOM   2531  C   VAL A 315       2.760  -4.485  28.232  1.00 62.07           C
ATOM   2532  O   VAL A 315       3.041  -4.432  27.038  1.00 62.07           O
ATOM   2533  N   VAL A 316       1.897  -5.399  28.735  1.00 60.50           N
ATOM   2534  CA  VAL A 316       1.183  -6.364  27.941  1.00 60.50           C
ATOM   2535  CB  VAL A 316       0.947  -7.655  28.669  1.00 60.50           C
ATOM   2536  CG1 VAL A 316       2.310  -8.317  28.930  1.00 60.50           C
ATOM   2537  CG2 VAL A 316       0.161  -7.347  29.956  1.00 60.50           C
ATOM   2538  C   VAL A 316      -0.157  -5.792  27.574  1.00 60.50           C
ATOM   2539  O   VAL A 316      -0.613  -4.821  28.175  1.00 60.50           O
ATOM   2540  N   PRO A 317      -0.826  -6.361  26.599  1.00 85.27           N
ATOM   2541  CA  PRO A 317      -2.100  -5.810  26.238  1.00 85.27           C
ATOM   2542  CD  PRO A 317      -0.169  -7.010  25.477  1.00 85.27           C
ATOM   2543  CB  PRO A 317      -2.520  -6.557  24.976  1.00 85.27           C
ATOM   2544  CG  PRO A 317      -1.168  -6.896  24.308  1.00 85.27           C
ATOM   2545  C   PRO A 317      -3.022  -5.908  27.413  1.00 85.27           C
ATOM   2546  O   PRO A 317      -2.980  -6.899  28.139  1.00 85.27           O
ATOM   2547  N   GLY A 318      -3.876  -4.886  27.609  1.00 33.53           N
ATOM   2548  CA  GLY A 318      -4.740  -4.824  28.750  1.00 33.53           C
ATOM   2549  C   GLY A 318      -4.148  -3.853  29.724  1.00 33.53           C
ATOM   2550  O   GLY A 318      -4.767  -3.526  30.737  1.00 33.53           O
ATOM   2551  N   VAL A 319      -2.925  -3.357  29.444  1.00 63.21           N
ATOM   2552  CA  VAL A 319      -2.348  -2.416  30.363  1.00 63.21           C
ATOM   2553  CB  VAL A 319      -1.340  -3.057  31.269  1.00 63.21           C
ATOM   2554  CG1 VAL A 319      -0.763  -1.995  32.216  1.00 63.21           C
ATOM   2555  CG2 VAL A 319      -1.981  -4.275  31.953  1.00 63.21           C
ATOM   2556  C   VAL A 319      -1.754  -1.266  29.598  1.00 63.21           C
ATOM   2557  O   VAL A 319      -1.202  -1.444  28.511  1.00 63.21           O
ATOM   2558  N   TYR A 320      -1.894  -0.031  30.142  1.00 69.63           N
ATOM   2559  CA  TYR A 320      -1.393   1.144  29.473  1.00 69.63           C
ATOM   2560  CB  TYR A 320      -2.483   1.898  28.703  1.00 69.63           C
ATOM   2561  CG  TYR A 320      -3.136   0.829  27.904  1.00 69.63           C
ATOM   2562  CD1 TYR A 320      -2.593   0.373  26.725  1.00 69.63           C
ATOM   2563  CD2 TYR A 320      -4.287   0.249  28.379  1.00 69.63           C
ATOM   2564  CE1 TYR A 320      -3.212  -0.632  26.015  1.00 69.63           C
ATOM   2565  CE2 TYR A 320      -4.904  -0.749  27.672  1.00 69.63           C
ATOM   2566  CZ  TYR A 320      -4.373  -1.193  26.489  1.00 69.63           C
ATOM   2567  OH  TYR A 320      -5.020  -2.223  25.773  1.00 69.63           O
ATOM   2568  C   TYR A 320      -0.826   2.067  30.511  1.00 69.63           C
ATOM   2569  O   TYR A 320      -1.101   1.929  31.700  1.00 69.63           O
ATOM   2570  N   TYR A 321      -0.010   3.047  30.077  1.00184.17           N
ATOM   2571  CA  TYR A 321       0.665   3.950  30.968  1.00184.17           C
ATOM   2572  CB  TYR A 321       1.843   4.644  30.277  1.00184.17           C
ATOM   2573  CG  TYR A 321       2.396   3.632  29.336  1.00184.17           C
ATOM   2574  CD1 TYR A 321       3.309   2.678  29.720  1.00184.17           C
ATOM   2575  CD2 TYR A 321       1.945   3.639  28.036  1.00184.17           C
ATOM   2576  CE1 TYR A 321       3.766   1.768  28.795  1.00184.17           C
ATOM   2577  CE2 TYR A 321       2.402   2.732  27.113  1.00184.17           C
ATOM   2578  CZ  TYR A 321       3.322   1.790  27.494  1.00184.17           C
ATOM   2579  OH  TYR A 321       3.800   0.850  26.555  1.00184.17           O
ATOM   2580  C   TYR A 321      -0.289   5.053  31.312  1.00184.17           C
ATOM   2581  O   TYR A 321      -1.162   5.400  30.519  1.00184.17           O
ATOM   2582  N   SER A 322      -0.196   5.589  32.546  1.00 50.53           N
ATOM   2583  CA  SER A 322      -0.994   6.732  32.885  1.00 50.53           C
ATOM   2584  CB  SER A 322      -1.259   6.889  34.389  1.00 50.53           C
ATOM   2585  OG  SER A 322      -0.046   7.188  35.063  1.00 50.53           O
ATOM   2586  C   SER A 322      -0.269   7.969  32.425  1.00 50.53           C
ATOM   2587  O   SER A 322       0.899   7.936  32.045  1.00 50.53           O
ATOM   2588  N   ASP A 323      -0.990   9.102  32.482  1.00 90.55           N
ATOM   2589  CA  ASP A 323      -0.617  10.439  32.094  1.00 90.55           C
ATOM   2590  CB  ASP A 323      -1.814  11.397  32.206  1.00 90.55           C
ATOM   2591  CG  ASP A 323      -2.882  10.898  31.242  1.00 90.55           C
ATOM   2592  OD1 ASP A 323      -2.674  11.008  30.006  1.00 90.55           O
ATOM   2593  OD2 ASP A 323      -3.925  10.394  31.738  1.00 90.55           O
ATOM   2594  C   ASP A 323       0.467  10.955  33.005  1.00 90.55           C
ATOM   2595  O   ASP A 323       1.089  11.968  32.685  1.00 90.55           O
ATOM   2596  N   ASP A 324       0.675  10.306  34.180  1.00 77.79           N
ATOM   2597  CA  ASP A 324       1.643  10.696  35.184  1.00 77.79           C
ATOM   2598  CB  ASP A 324       1.971   9.524  36.136  1.00 77.79           C
ATOM   2599  CG  ASP A 324       2.864   9.966  37.287  1.00 77.79           C
ATOM   2600  OD1 ASP A 324       3.770  10.813  37.064  1.00 77.79           O
ATOM   2601  OD2 ASP A 324       2.652   9.445  38.414  1.00 77.79           O
ATOM   2602  C   ASP A 324       2.912  11.151  34.502  1.00 77.79           C
ATOM   2603  O   ASP A 324       3.543  10.420  33.745  1.00 77.79           O
ATOM   2604  N   LYS A 325       3.286  12.421  34.765  1.00109.54           N
ATOM   2605  CA  LYS A 325       4.363  13.131  34.123  1.00109.54           C
ATOM   2606  CB  LYS A 325       4.332  14.629  34.458  1.00109.54           C
ATOM   2607  CG  LYS A 325       3.032  15.267  33.963  1.00109.54           C
ATOM   2608  CD  LYS A 325       2.846  16.733  34.343  1.00109.54           C
ATOM   2609  CE  LYS A 325       3.198  17.679  33.197  1.00109.54           C
ATOM   2610  NZ  LYS A 325       2.727  19.046  33.502  1.00109.54           N
ATOM   2611  C   LYS A 325       5.709  12.560  34.453  1.00109.54           C
ATOM   2612  O   LYS A 325       6.652  12.691  33.673  1.00109.54           O
ATOM   2613  N   LEU A 326       5.883  12.011  35.664  1.00 68.69           N
ATOM   2614  CA  LEU A 326       7.139  11.399  35.976  1.00 68.69           C
ATOM   2615  CB  LEU A 326       7.241  11.009  37.463  1.00 68.69           C
ATOM   2616  CG  LEU A 326       8.585  10.378  37.866  1.00 68.69           C
ATOM   2617  CD1 LEU A 326       9.731  11.397  37.775  1.00 68.69           C
ATOM   2618  CD2 LEU A 326       8.491   9.709  39.246  1.00 68.69           C
ATOM   2619  C   LEU A 326       7.261  10.122  35.180  1.00 68.69           C
ATOM   2620  O   LEU A 326       8.293   9.833  34.577  1.00 68.69           O
ATOM   2621  N   LEU A 327       6.164   9.342  35.138  1.00 73.06           N
ATOM   2622  CA  LEU A 327       6.082   8.048  34.520  1.00 73.06           C
ATOM   2623  CB  LEU A 327       4.657   7.495  34.703  1.00 73.06           C
ATOM   2624  CG  LEU A 327       4.353   6.177  33.981  1.00 73.06           C
ATOM   2625  CD1 LEU A 327       5.283   5.051  34.454  1.00 73.06           C
ATOM   2626  CD2 LEU A 327       2.863   5.823  34.124  1.00 73.06           C
ATOM   2627  C   LEU A 327       6.362   8.153  33.050  1.00 73.06           C
ATOM   2628  O   LEU A 327       7.067   7.321  32.478  1.00 73.06           O
ATOM   2629  N   GLN A 328       5.842   9.211  32.408  1.00 73.64           N
ATOM   2630  CA  GLN A 328       5.943   9.365  30.985  1.00 73.64           C
ATOM   2631  CB  GLN A 328       5.207  10.602  30.443  1.00 73.64           C
ATOM   2632  CG  GLN A 328       3.681  10.467  30.471  1.00 73.64           C
ATOM   2633  CD  GLN A 328       3.271   9.375  29.484  1.00 73.64           C
ATOM   2634  OE1 GLN A 328       3.148   8.208  29.849  1.00 73.64           O
ATOM   2635  NE2 GLN A 328       3.050   9.756  28.197  1.00 73.64           N
ATOM   2636  C   GLN A 328       7.369   9.433  30.510  1.00 73.64           C
ATOM   2637  O   GLN A 328       7.674   8.945  29.422  1.00 73.64           O
ATOM   2638  N   THR A 329       8.274  10.078  31.270  1.00109.55           N
ATOM   2639  CA  THR A 329       9.659  10.183  30.881  1.00109.55           C
ATOM   2640  CB  THR A 329      10.435  11.153  31.722  1.00109.55           C
ATOM   2641  OG1 THR A 329      11.729  11.358  31.166  1.00109.55           O
ATOM   2642  CG2 THR A 329      10.545  10.604  33.152  1.00109.55           C
ATOM   2643  C   THR A 329      10.317   8.842  30.972  1.00109.55           C
ATOM   2644  O   THR A 329      11.182   8.496  30.168  1.00109.55           O
ATOM   2645  N   ARG A 330       9.915   8.044  31.972  1.00161.72           N
ATOM   2646  CA  ARG A 330      10.507   6.765  32.203  1.00161.72           C
ATOM   2647  CB  ARG A 330      10.006   6.089  33.490  1.00161.72           C
ATOM   2648  CG  ARG A 330      10.394   6.881  34.744  1.00161.72           C
ATOM   2649  CD  ARG A 330      10.484   6.040  36.018  1.00161.72           C
ATOM   2650  NE  ARG A 330       9.157   5.413  36.253  1.00161.72           N
ATOM   2651  CZ  ARG A 330       9.068   4.274  37.001  1.00161.72           C
ATOM   2652  NH1 ARG A 330      10.196   3.676  37.483  1.00161.72           N
ATOM   2653  NH2 ARG A 330       7.846   3.733  37.278  1.00161.72           N
ATOM   2654  C   ARG A 330      10.263   5.856  31.038  1.00161.72           C
ATOM   2655  O   ARG A 330      11.130   5.051  30.702  1.00161.72           O
ATOM   2656  N   ILE A 331       9.104   5.995  30.363  1.00105.09           N
ATOM   2657  CA  ILE A 331       8.734   5.118  29.284  1.00105.09           C
ATOM   2658  CB  ILE A 331       7.504   5.599  28.574  1.00105.09           C
ATOM   2659  CG1 ILE A 331       6.353   5.759  29.578  1.00105.09           C
ATOM   2660  CG2 ILE A 331       7.191   4.613  27.435  1.00105.09           C
ATOM   2661  CD1 ILE A 331       5.994   4.463  30.301  1.00105.09           C
ATOM   2662  C   ILE A 331       9.858   5.128  28.288  1.00105.09           C
ATOM   2663  O   ILE A 331      10.225   4.084  27.750  1.00105.09           O
ATOM   2664  N   PHE A 332      10.395   6.323  27.987  1.00 87.02           N
ATOM   2665  CA  PHE A 332      11.500   6.509  27.083  1.00 87.02           C
ATOM   2666  CB  PHE A 332      11.600   7.967  26.604  1.00 87.02           C
ATOM   2667  CG  PHE A 332      12.838   8.109  25.788  1.00 87.02           C
ATOM   2668  CD1 PHE A 332      12.910   7.601  24.512  1.00 87.02           C
ATOM   2669  CD2 PHE A 332      13.928   8.772  26.301  1.00 87.02           C
ATOM   2670  CE1 PHE A 332      14.059   7.743  23.769  1.00 87.02           C
ATOM   2671  CE2 PHE A 332      15.078   8.918  25.564  1.00 87.02           C
ATOM   2672  CZ  PHE A 332      15.146   8.400  24.294  1.00 87.02           C
ATOM   2673  C   PHE A 332      12.842   6.128  27.645  1.00 87.02           C
ATOM   2674  O   PHE A 332      13.623   5.437  26.991  1.00 87.02           O
ATOM   2675  N   SER A 333      13.121   6.552  28.891  1.00 65.47           N
ATOM   2676  CA  SER A 333      14.440   6.521  29.472  1.00 65.47           C
ATOM   2677  CB  SER A 333      14.465   7.155  30.872  1.00 65.47           C
ATOM   2678  OG  SER A 333      15.780   7.105  31.407  1.00 65.47           O
ATOM   2679  C   SER A 333      15.035   5.148  29.600  1.00 65.47           C
ATOM   2680  O   SER A 333      16.199   4.953  29.254  1.00 65.47           O
ATOM   2681  N   TYR A 334      14.265   4.166  30.102  1.00152.12           N
ATOM   2682  CA  TYR A 334      14.808   2.870  30.415  1.00152.12           C
ATOM   2683  CB  TYR A 334      13.744   1.968  31.066  1.00152.12           C
ATOM   2684  CG  TYR A 334      13.415   2.529  32.411  1.00152.12           C
ATOM   2685  CD1 TYR A 334      12.594   3.629  32.538  1.00152.12           C
ATOM   2686  CD2 TYR A 334      13.950   1.969  33.550  1.00152.12           C
ATOM   2687  CE1 TYR A 334      12.297   4.149  33.776  1.00152.12           C
ATOM   2688  CE2 TYR A 334      13.656   2.483  34.792  1.00152.12           C
ATOM   2689  CZ  TYR A 334      12.828   3.574  34.906  1.00152.12           C
ATOM   2690  OH  TYR A 334      12.526   4.102  36.178  1.00152.12           O
ATOM   2691  C   TYR A 334      15.334   2.169  29.203  1.00152.12           C
ATOM   2692  O   TYR A 334      16.491   1.753  29.181  1.00152.12           O
ATOM   2693  N   SER A 335      14.517   2.041  28.145  1.00 48.32           N
ATOM   2694  CA  SER A 335      14.962   1.319  26.990  1.00 48.32           C
ATOM   2695  CB  SER A 335      13.856   1.106  25.945  1.00 48.32           C
ATOM   2696  OG  SER A 335      12.827   0.294  26.490  1.00 48.32           O
ATOM   2697  C   SER A 335      16.060   2.087  26.323  1.00 48.32           C
ATOM   2698  O   SER A 335      16.953   1.495  25.716  1.00 48.32           O
ATOM   2699  N   ASP A 336      16.004   3.432  26.411  1.00 73.26           N
ATOM   2700  CA  ASP A 336      16.981   4.278  25.779  1.00 73.26           C
ATOM   2701  CB  ASP A 336      16.707   5.780  25.957  1.00 73.26           C
ATOM   2702  CG  ASP A 336      17.852   6.550  25.303  1.00 73.26           C
ATOM   2703  OD1 ASP A 336      18.216   6.218  24.142  1.00 73.26           O
ATOM   2704  OD2 ASP A 336      18.398   7.465  25.977  1.00 73.26           O
ATOM   2705  C   ASP A 336      18.334   4.044  26.372  1.00 73.26           C
ATOM   2706  O   ASP A 336      19.316   3.932  25.643  1.00 73.26           O
ATOM   2707  N   THR A 337      18.410   3.987  27.715  1.00120.99           N
ATOM   2708  CA  THR A 337      19.648   3.795  28.422  1.00120.99           C
ATOM   2709  CB  THR A 337      19.516   4.027  29.908  1.00120.99           C
ATOM   2710  OG1 THR A 337      20.777   3.896  30.544  1.00120.99           O
ATOM   2711  CG2 THR A 337      18.503   3.044  30.512  1.00120.99           C
ATOM   2712  C   THR A 337      20.169   2.408  28.175  1.00120.99           C
ATOM   2713  O   THR A 337      21.376   2.184  28.120  1.00120.99           O
ATOM   2714  N   GLN A 338      19.258   1.429  28.040  1.00 74.31           N
ATOM   2715  CA  GLN A 338      19.589   0.044  27.844  1.00 74.31           C
ATOM   2716  CB  GLN A 338      18.323  -0.824  27.905  1.00 74.31           C
ATOM   2717  CG  GLN A 338      17.649  -0.737  29.279  1.00 74.31           C
ATOM   2718  CD  GLN A 338      16.187  -1.139  29.139  1.00 74.31           C
ATOM   2719  OE1 GLN A 338      15.775  -1.693  28.121  1.00 74.31           O
ATOM   2720  NE2 GLN A 338      15.381  -0.871  30.201  1.00 74.31           N
ATOM   2721  C   GLN A 338      20.262  -0.152  26.510  1.00 74.31           C
ATOM   2722  O   GLN A 338      21.138  -1.005  26.372  1.00 74.31           O
ATOM   2723  N   ARG A 339      19.861   0.609  25.474  1.00119.01           N
ATOM   2724  CA  ARG A 339      20.482   0.441  24.190  1.00119.01           C
ATOM   2725  CB  ARG A 339      19.802   1.258  23.076  1.00119.01           C
ATOM   2726  CG  ARG A 339      18.527   0.555  22.588  1.00119.01           C
ATOM   2727  CD  ARG A 339      17.833   1.195  21.380  1.00119.01           C
ATOM   2728  NE  ARG A 339      16.767   2.118  21.866  1.00119.01           N
ATOM   2729  CZ  ARG A 339      15.484   1.662  21.984  1.00119.01           C
ATOM   2730  NH1 ARG A 339      15.199   0.345  21.764  1.00119.01           N
ATOM   2731  NH2 ARG A 339      14.478   2.527  22.307  1.00119.01           N
ATOM   2732  C   ARG A 339      21.933   0.791  24.312  1.00119.01           C
ATOM   2733  O   ARG A 339      22.776   0.212  23.625  1.00119.01           O
ATOM   2734  N   HIS A 340      22.253   1.818  25.120  1.00 76.31           N
ATOM   2735  CA  HIS A 340      23.621   2.160  25.390  1.00 76.31           C
ATOM   2736  ND1 HIS A 340      26.233   4.069  25.686  1.00 76.31           N
ATOM   2737  CG  HIS A 340      25.173   3.774  26.514  1.00 76.31           C
ATOM   2738  CB  HIS A 340      23.767   3.536  26.055  1.00 76.31           C
ATOM   2739  NE2 HIS A 340      27.051   3.965  27.751  1.00 76.31           N
ATOM   2740  CD2 HIS A 340      25.690   3.716  27.772  1.00 76.31           C
ATOM   2741  CE1 HIS A 340      27.330   4.171  26.477  1.00 76.31           C
ATOM   2742  C   HIS A 340      24.288   1.170  26.308  1.00 76.31           C
ATOM   2743  O   HIS A 340      25.335   0.613  25.978  1.00 76.31           O
ATOM   2744  N   ARG A 341      23.688   0.924  27.494  1.00178.27           N
ATOM   2745  CA  ARG A 341      24.324   0.107  28.496  1.00178.27           C
ATOM   2746  CB  ARG A 341      23.573   0.075  29.840  1.00178.27           C
ATOM   2747  CG  ARG A 341      24.174  -0.940  30.820  1.00178.27           C
ATOM   2748  CD  ARG A 341      23.806  -0.715  32.289  1.00178.27           C
ATOM   2749  NE  ARG A 341      22.333  -0.877  32.436  1.00178.27           N
ATOM   2750  CZ  ARG A 341      21.797  -2.115  32.643  1.00178.27           C
ATOM   2751  NH1 ARG A 341      22.610  -3.210  32.699  1.00178.27           N
ATOM   2752  NH2 ARG A 341      20.447  -2.257  32.789  1.00178.27           N
ATOM   2753  C   ARG A 341      24.515  -1.320  28.068  1.00178.27           C
ATOM   2754  O   ARG A 341      25.613  -1.861  28.190  1.00178.27           O
ATOM   2755  N   LEU A 342      23.426  -2.003  27.667  1.00165.38           N
ATOM   2756  CA  LEU A 342      23.492  -3.379  27.250  1.00165.38           C
ATOM   2757  CB  LEU A 342      22.177  -4.117  27.565  1.00165.38           C
ATOM   2758  CG  LEU A 342      22.230  -5.644  27.377  1.00165.38           C
ATOM   2759  CD1 LEU A 342      23.296  -6.284  28.282  1.00165.38           C
ATOM   2760  CD2 LEU A 342      20.843  -6.268  27.603  1.00165.38           C
ATOM   2761  C   LEU A 342      23.843  -3.528  25.793  1.00165.38           C
ATOM   2762  O   LEU A 342      24.635  -4.394  25.427  1.00165.38           O
ATOM   2763  N   GLY A 343      23.240  -2.693  24.915  1.00 41.38           N
ATOM   2764  CA  GLY A 343      23.499  -2.797  23.498  1.00 41.38           C
ATOM   2765  C   GLY A 343      22.208  -2.668  22.732  1.00 41.38           C
ATOM   2766  O   GLY A 343      21.121  -2.812  23.292  1.00 41.38           O
ATOM   2767  N   PRO A 344      22.303  -2.422  21.442  1.00170.34           N
ATOM   2768  CA  PRO A 344      21.146  -2.249  20.602  1.00170.34           C
ATOM   2769  CD  PRO A 344      23.494  -1.833  20.856  1.00170.34           C
ATOM   2770  CB  PRO A 344      21.663  -1.691  19.274  1.00170.34           C
ATOM   2771  CG  PRO A 344      23.195  -1.837  19.350  1.00170.34           C
ATOM   2772  C   PRO A 344      20.280  -3.470  20.489  1.00170.34           C
ATOM   2773  O   PRO A 344      19.073  -3.311  20.309  1.00170.34           O
ATOM   2774  N   ASN A 345      20.856  -4.688  20.568  1.00129.65           N
ATOM   2775  CA  ASN A 345      20.043  -5.869  20.491  1.00129.65           C
ATOM   2776  CB  ASN A 345      20.639  -6.915  19.537  1.00129.65           C
ATOM   2777  CG  ASN A 345      20.547  -6.348  18.127  1.00129.65           C
ATOM   2778  OD1 ASN A 345      19.465  -6.252  17.550  1.00129.65           O
ATOM   2779  ND2 ASN A 345      21.713  -5.938  17.556  1.00129.65           N
ATOM   2780  C   ASN A 345      19.960  -6.480  21.863  1.00129.65           C
ATOM   2781  O   ASN A 345      20.010  -7.698  22.031  1.00129.65           O
ATOM   2782  N   TYR A 346      19.722  -5.639  22.884  1.00177.06           N
ATOM   2783  CA  TYR A 346      19.699  -6.084  24.251  1.00177.06           C
ATOM   2784  CB  TYR A 346      19.619  -4.931  25.280  1.00177.06           C
ATOM   2785  CG  TYR A 346      18.285  -4.265  25.302  1.00177.06           C
ATOM   2786  CD1 TYR A 346      18.009  -3.200  24.477  1.00177.06           C
ATOM   2787  CD2 TYR A 346      17.313  -4.702  26.174  1.00177.06           C
ATOM   2788  CE1 TYR A 346      16.778  -2.587  24.512  1.00177.06           C
ATOM   2789  CE2 TYR A 346      16.081  -4.096  26.214  1.00177.06           C
ATOM   2790  CZ  TYR A 346      15.812  -3.036  25.382  1.00177.06           C
ATOM   2791  OH  TYR A 346      14.549  -2.411  25.420  1.00177.06           O
ATOM   2792  C   TYR A 346      18.561  -7.047  24.450  1.00177.06           C
ATOM   2793  O   TYR A 346      18.656  -7.969  25.259  1.00177.06           O
ATOM   2794  N   LEU A 347      17.448  -6.856  23.715  1.00120.45           N
ATOM   2795  CA  LEU A 347      16.267  -7.670  23.861  1.00120.45           C
ATOM   2796  CB  LEU A 347      15.027  -7.144  23.116  1.00120.45           C
ATOM   2797  CG  LEU A 347      14.647  -5.719  23.566  1.00120.45           C
ATOM   2798  CD1 LEU A 347      15.531  -4.679  22.860  1.00120.45           C
ATOM   2799  CD2 LEU A 347      13.139  -5.438  23.478  1.00120.45           C
ATOM   2800  C   LEU A 347      16.516  -9.095  23.453  1.00120.45           C
ATOM   2801  O   LEU A 347      15.721  -9.977  23.781  1.00120.45           O
ATOM   2802  N   GLN A 348      17.556  -9.338  22.633  1.00 94.54           N
ATOM   2803  CA  GLN A 348      17.940 -10.647  22.162  1.00 94.54           C
ATOM   2804  CB  GLN A 348      18.903 -10.568  20.962  1.00 94.54           C
ATOM   2805  CG  GLN A 348      18.253  -9.882  19.752  1.00 94.54           C
ATOM   2806  CD  GLN A 348      19.232  -9.822  18.588  1.00 94.54           C
ATOM   2807  OE1 GLN A 348      18.827  -9.680  17.434  1.00 94.54           O
ATOM   2808  NE2 GLN A 348      20.556  -9.928  18.885  1.00 94.54           N
ATOM   2809  C   GLN A 348      18.548 -11.508  23.245  1.00 94.54           C
ATOM   2810  O   GLN A 348      18.517 -12.734  23.145  1.00 94.54           O
ATOM   2811  N   LEU A 349      19.174 -10.911  24.279  1.00 70.21           N
ATOM   2812  CA  LEU A 349      19.855 -11.680  25.295  1.00 70.21           C
ATOM   2813  CB  LEU A 349      20.656 -10.784  26.251  1.00 70.21           C
ATOM   2814  CG  LEU A 349      21.790 -10.008  25.547  1.00 70.21           C
ATOM   2815  CD1 LEU A 349      22.573  -9.129  26.537  1.00 70.21           C
ATOM   2816  CD2 LEU A 349      22.696 -10.950  24.738  1.00 70.21           C
ATOM   2817  C   LEU A 349      18.875 -12.520  26.074  1.00 70.21           C
ATOM   2818  O   LEU A 349      17.745 -12.114  26.335  1.00 70.21           O
ATOM   2819  N   PRO A 350      19.302 -13.691  26.494  1.00 83.23           N
ATOM   2820  CA  PRO A 350      18.424 -14.651  27.114  1.00 83.23           C
ATOM   2821  CD  PRO A 350      20.502 -14.312  25.963  1.00 83.23           C
ATOM   2822  CB  PRO A 350      19.279 -15.891  27.363  1.00 83.23           C
ATOM   2823  CG  PRO A 350      20.343 -15.816  26.251  1.00 83.23           C
ATOM   2824  C   PRO A 350      17.655 -14.176  28.312  1.00 83.23           C
ATOM   2825  O   PRO A 350      16.520 -14.615  28.489  1.00 83.23           O
ATOM   2826  N   VAL A 351      18.233 -13.306  29.157  1.00113.88           N
ATOM   2827  CA  VAL A 351      17.537 -12.836  30.321  1.00113.88           C
ATOM   2828  CB  VAL A 351      18.401 -12.016  31.232  1.00113.88           C
ATOM   2829  CG1 VAL A 351      19.577 -12.887  31.701  1.00113.88           C
ATOM   2830  CG2 VAL A 351      18.809 -10.726  30.502  1.00113.88           C
ATOM   2831  C   VAL A 351      16.386 -11.965  29.907  1.00113.88           C
ATOM   2832  O   VAL A 351      15.378 -11.893  30.607  1.00113.88           O
ATOM   2833  N   ASN A 352      16.574 -11.185  28.824  1.00 91.49           N
ATOM   2834  CA  ASN A 352      15.607 -10.263  28.286  1.00 91.49           C
ATOM   2835  CB  ASN A 352      16.276  -9.089  27.554  1.00 91.49           C
ATOM   2836  CG  ASN A 352      16.885  -8.209  28.639  1.00 91.49           C
ATOM   2837  OD1 ASN A 352      16.207  -7.828  29.593  1.00 91.49           O
ATOM   2838  ND2 ASN A 352      18.199  -7.881  28.504  1.00 91.49           N
ATOM   2839  C   ASN A 352      14.578 -10.893  27.385  1.00 91.49           C
ATOM   2840  O   ASN A 352      13.474 -10.368  27.251  1.00 91.49           O
ATOM   2841  N   ALA A 353      14.908 -12.016  26.714  1.00 49.58           N
ATOM   2842  CA  ALA A 353      14.032 -12.581  25.713  1.00 49.58           C
ATOM   2843  CB  ALA A 353      14.601 -13.856  25.065  1.00 49.58           C
ATOM   2844  C   ALA A 353      12.679 -12.915  26.278  1.00 49.58           C
ATOM   2845  O   ALA A 353      12.534 -13.372  27.411  1.00 49.58           O
ATOM   2846  N   PRO A 354      11.677 -12.671  25.464  1.00 76.06           N
ATOM   2847  CA  PRO A 354      10.307 -12.939  25.835  1.00 76.06           C
ATOM   2848  CD  PRO A 354      11.777 -11.583  24.502  1.00 76.06           C
ATOM   2849  CB  PRO A 354       9.447 -12.179  24.826  1.00 76.06           C
ATOM   2850  CG  PRO A 354      10.351 -11.029  24.353  1.00 76.06           C
ATOM   2851  C   PRO A 354      10.033 -14.406  25.780  1.00 76.06           C
ATOM   2852  O   PRO A 354      10.786 -15.131  25.133  1.00 76.06           O
ATOM   2853  N   LYS A 355       8.994 -14.869  26.502  1.00117.76           N
ATOM   2854  CA  LYS A 355       8.564 -16.231  26.400  1.00117.76           C
ATOM   2855  CB  LYS A 355       7.490 -16.593  27.439  1.00117.76           C
ATOM   2856  CG  LYS A 355       7.285 -18.100  27.607  1.00117.76           C
ATOM   2857  CD  LYS A 355       6.906 -18.839  26.320  1.00117.76           C
ATOM   2858  CE  LYS A 355       5.409 -18.826  26.006  1.00117.76           C
ATOM   2859  NZ  LYS A 355       5.155 -19.593  24.766  1.00117.76           N
ATOM   2860  C   LYS A 355       7.936 -16.375  25.047  1.00117.76           C
ATOM   2861  O   LYS A 355       8.142 -17.365  24.349  1.00117.76           O
ATOM   2862  N   CYS A 356       7.150 -15.355  24.646  1.00 79.38           N
ATOM   2863  CA  CYS A 356       6.464 -15.365  23.383  1.00 79.38           C
ATOM   2864  CB  CYS A 356       5.389 -14.272  23.244  1.00 79.38           C
ATOM   2865  SG  CYS A 356       4.542 -14.322  21.635  1.00 79.38           S
ATOM   2866  C   CYS A 356       7.466 -15.138  22.297  1.00 79.38           C
ATOM   2867  O   CYS A 356       8.447 -14.422  22.484  1.00 79.38           O
ATOM   2868  N   ALA A 357       7.227 -15.747  21.119  1.00 32.07           N
ATOM   2869  CA  ALA A 357       8.133 -15.610  20.015  1.00 32.07           C
ATOM   2870  CB  ALA A 357       7.800 -16.535  18.832  1.00 32.07           C
ATOM   2871  C   ALA A 357       8.092 -14.197  19.518  1.00 32.07           C
ATOM   2872  O   ALA A 357       7.074 -13.514  19.621  1.00 32.07           O
ATOM   2873  N   HIS A 358       9.236 -13.722  18.979  1.00124.28           N
ATOM   2874  CA  HIS A 358       9.345 -12.400  18.424  1.00124.28           C
ATOM   2875  ND1 HIS A 358      11.730 -10.422  16.939  1.00124.28           N
ATOM   2876  CG  HIS A 358      10.906 -10.423  18.045  1.00124.28           C
ATOM   2877  CB  HIS A 358      10.627 -11.657  18.855  1.00124.28           C
ATOM   2878  NE2 HIS A 358      10.986  -8.343  17.175  1.00124.28           N
ATOM   2879  CD2 HIS A 358      10.460  -9.144  18.175  1.00124.28           C
ATOM   2880  CE1 HIS A 358      11.742  -9.154  16.459  1.00124.28           C
ATOM   2881  C   HIS A 358       9.411 -12.545  16.934  1.00124.28           C
ATOM   2882  O   HIS A 358      10.275 -13.255  16.421  1.00124.28           O
ATOM   2883  N   HIS A 359       8.486 -11.874  16.208  1.00109.39           N
ATOM   2884  CA  HIS A 359       8.434 -11.957  14.775  1.00109.39           C
ATOM   2885  ND1 HIS A 359       7.568 -15.185  14.601  1.00109.39           N
ATOM   2886  CG  HIS A 359       6.978 -13.999  14.973  1.00109.39           C
ATOM   2887  CB  HIS A 359       7.184 -12.690  14.277  1.00109.39           C
ATOM   2888  NE2 HIS A 359       6.316 -15.628  16.385  1.00109.39           N
ATOM   2889  CD2 HIS A 359       6.217 -14.287  16.065  1.00109.39           C
ATOM   2890  CE1 HIS A 359       7.139 -16.127  15.480  1.00109.39           C
ATOM   2891  C   HIS A 359       8.297 -10.559  14.260  1.00109.39           C
ATOM   2892  O   HIS A 359       7.229  -9.958  14.371  1.00109.39           O
ATOM   2893  N   ASN A 360       9.357 -10.024  13.629  1.00168.77           N
ATOM   2894  CA  ASN A 360       9.310  -8.637  13.270  1.00168.77           C
ATOM   2895  CB  ASN A 360       9.810  -7.808  14.480  1.00168.77           C
ATOM   2896  CG  ASN A 360       9.553  -6.314  14.370  1.00168.77           C
ATOM   2897  OD1 ASN A 360      10.222  -5.600  13.628  1.00168.77           O
ATOM   2898  ND2 ASN A 360       8.579  -5.804  15.166  1.00168.77           N
ATOM   2899  C   ASN A 360      10.227  -8.396  12.109  1.00168.77           C
ATOM   2900  O   ASN A 360      10.969  -9.282  11.684  1.00168.77           O
ATOM   2901  N   ASN A 361      10.184  -7.170  11.548  1.00126.54           N
ATOM   2902  CA  ASN A 361      11.018  -6.867  10.427  1.00126.54           C
ATOM   2903  CB  ASN A 361      10.214  -6.260   9.268  1.00126.54           C
ATOM   2904  CG  ASN A 361       9.303  -7.390   8.798  1.00126.54           C
ATOM   2905  OD1 ASN A 361       9.768  -8.418   8.308  1.00126.54           O
ATOM   2906  ND2 ASN A 361       7.966  -7.216   8.983  1.00126.54           N
ATOM   2907  C   ASN A 361      12.155  -5.967  10.824  1.00126.54           C
ATOM   2908  O   ASN A 361      12.718  -5.274   9.977  1.00126.54           O
ATOM   2909  N   HIS A 362      12.556  -5.992  12.117  1.00104.58           N
ATOM   2910  CA  HIS A 362      13.714  -5.256  12.561  1.00104.58           C
ATOM   2911  ND1 HIS A 362      11.845  -4.677  15.520  1.00104.58           N
ATOM   2912  CG  HIS A 362      12.904  -4.228  14.767  1.00104.58           C
ATOM   2913  CB  HIS A 362      13.886  -5.121  14.088  1.00104.58           C
ATOM   2914  NE2 HIS A 362      11.757  -2.461  15.565  1.00104.58           N
ATOM   2915  CD2 HIS A 362      12.837  -2.869  14.805  1.00104.58           C
ATOM   2916  CE1 HIS A 362      11.191  -3.581  15.972  1.00104.58           C
ATOM   2917  C   HIS A 362      14.900  -6.067  12.155  1.00104.58           C
ATOM   2918  O   HIS A 362      14.815  -7.292  12.102  1.00104.58           O
ATOM   2919  N   HIS A 363      16.048  -5.414  11.871  1.00116.80           N
ATOM   2920  CA  HIS A 363      17.186  -6.189  11.467  1.00116.80           C
ATOM   2921  ND1 HIS A 363      15.085  -7.130   8.821  1.00116.80           N
ATOM   2922  CG  HIS A 363      16.249  -7.452   9.480  1.00116.80           C
ATOM   2923  CB  HIS A 363      17.265  -6.455   9.952  1.00116.80           C
ATOM   2924  NE2 HIS A 363      15.109  -9.345   9.021  1.00116.80           N
ATOM   2925  CD2 HIS A 363      16.246  -8.809   9.594  1.00116.80           C
ATOM   2926  CE1 HIS A 363      14.442  -8.299   8.572  1.00116.80           C
ATOM   2927  C   HIS A 363      18.466  -5.513  11.860  1.00116.80           C
ATOM   2928  O   HIS A 363      18.497  -4.333  12.210  1.00116.80           O
ATOM   2929  N   ASP A 364      19.562  -6.304  11.828  1.00151.81           N
ATOM   2930  CA  ASP A 364      20.905  -5.833  12.027  1.00151.81           C
ATOM   2931  CB  ASP A 364      21.274  -4.686  11.077  1.00151.81           C
ATOM   2932  CG  ASP A 364      21.258  -5.275   9.675  1.00151.81           C
ATOM   2933  OD1 ASP A 364      20.853  -6.461   9.543  1.00151.81           O
ATOM   2934  OD2 ASP A 364      21.646  -4.552   8.720  1.00151.81           O
ATOM   2935  C   ASP A 364      21.156  -5.394  13.436  1.00151.81           C
ATOM   2936  O   ASP A 364      20.620  -5.956  14.388  1.00151.81           O
ATOM   2937  N   GLY A 365      22.065  -4.404  13.590  1.00 50.73           N
ATOM   2938  CA  GLY A 365      22.465  -3.885  14.870  1.00 50.73           C
ATOM   2939  C   GLY A 365      23.615  -4.717  15.353  1.00 50.73           C
ATOM   2940  O   GLY A 365      23.714  -5.898  15.028  1.00 50.73           O
ATOM   2941  N   PHE A 366      24.480  -4.132  16.208  1.00 74.79           N
ATOM   2942  CA  PHE A 366      25.669  -4.797  16.675  1.00 74.79           C
ATOM   2943  CB  PHE A 366      26.442  -4.023  17.766  1.00 74.79           C
ATOM   2944  CG  PHE A 366      27.116  -2.814  17.207  1.00 74.79           C
ATOM   2945  CD1 PHE A 366      26.432  -1.633  17.041  1.00 74.79           C
ATOM   2946  CD2 PHE A 366      28.449  -2.857  16.870  1.00 74.79           C
ATOM   2947  CE1 PHE A 366      27.073  -0.528  16.532  1.00 74.79           C
ATOM   2948  CE2 PHE A 366      29.091  -1.752  16.361  1.00 74.79           C
ATOM   2949  CZ  PHE A 366      28.401  -0.579  16.188  1.00 74.79           C
ATOM   2950  C   PHE A 366      25.320  -6.118  17.300  1.00 74.79           C
ATOM   2951  O   PHE A 366      24.315  -6.254  17.995  1.00 74.79           O
ATOM   2952  N   MET A 367      26.207  -7.113  17.095  1.00140.99           N
ATOM   2953  CA  MET A 367      26.094  -8.432  17.660  1.00140.99           C
ATOM   2954  CB  MET A 367      26.407  -8.419  19.170  1.00140.99           C
ATOM   2955  CG  MET A 367      26.857  -9.754  19.771  1.00140.99           C
ATOM   2956  SD  MET A 367      25.612 -11.075  19.829  1.00140.99           S
ATOM   2957  CE  MET A 367      26.426 -12.007  21.158  1.00140.99           C
ATOM   2958  C   MET A 367      24.711  -8.986  17.449  1.00140.99           C
ATOM   2959  O   MET A 367      23.973  -9.207  18.405  1.00140.99           O
ATOM   2960  N   ASN A 368      24.328  -9.227  16.167  1.00189.85           N
ATOM   2961  CA  ASN A 368      23.003  -9.705  15.848  1.00189.85           C
ATOM   2962  CB  ASN A 368      22.562  -9.335  14.416  1.00189.85           C
ATOM   2963  CG  ASN A 368      23.551  -9.923  13.409  1.00189.85           C
ATOM   2964  OD1 ASN A 368      24.757  -9.704  13.510  1.00189.85           O
ATOM   2965  ND2 ASN A 368      23.028 -10.698  12.420  1.00189.85           N
ATOM   2966  C   ASN A 368      22.890 -11.203  15.998  1.00189.85           C
ATOM   2967  O   ASN A 368      22.656 -11.927  15.035  1.00189.85           O
ATOM   2968  N   PHE A 369      22.923 -11.706  17.243  1.00101.61           N
ATOM   2969  CA  PHE A 369      22.937 -13.126  17.500  1.00101.61           C
ATOM   2970  CB  PHE A 369      23.064 -13.413  19.011  1.00101.61           C
ATOM   2971  CG  PHE A 369      23.587 -14.795  19.214  1.00101.61           C
ATOM   2972  CD1 PHE A 369      24.946 -15.018  19.194  1.00101.61           C
ATOM   2973  CD2 PHE A 369      22.746 -15.860  19.435  1.00101.61           C
ATOM   2974  CE1 PHE A 369      25.463 -16.277  19.384  1.00101.61           C
ATOM   2975  CE2 PHE A 369      23.259 -17.123  19.626  1.00101.61           C
ATOM   2976  CZ  PHE A 369      24.617 -17.336  19.600  1.00101.61           C
ATOM   2977  C   PHE A 369      21.672 -13.788  16.996  1.00101.61           C
ATOM   2978  O   PHE A 369      21.719 -14.873  16.420  1.00101.61           O
ATOM   2979  N   MET A 370      20.519 -13.157  17.281  1.00154.95           N
ATOM   2980  CA  MET A 370      19.136 -13.490  17.017  1.00154.95           C
ATOM   2981  CB  MET A 370      18.166 -12.784  17.979  1.00154.95           C
ATOM   2982  CG  MET A 370      18.143 -13.363  19.399  1.00154.95           C
ATOM   2983  SD  MET A 370      17.113 -14.850  19.599  1.00154.95           S
ATOM   2984  CE  MET A 370      18.263 -15.975  18.761  1.00154.95           C
ATOM   2985  C   MET A 370      18.636 -13.216  15.625  1.00154.95           C
ATOM   2986  O   MET A 370      17.477 -13.525  15.362  1.00154.95           O
ATOM   2987  N   HIS A 371      19.409 -12.522  14.764  1.00 83.27           N
ATOM   2988  CA  HIS A 371      18.970 -12.024  13.478  1.00 83.27           C
ATOM   2989  ND1 HIS A 371      19.606  -9.468  11.503  1.00 83.27           N
ATOM   2990  CG  HIS A 371      19.733 -10.834  11.391  1.00 83.27           C
ATOM   2991  CB  HIS A 371      20.139 -11.715  12.529  1.00 83.27           C
ATOM   2992  NE2 HIS A 371      19.104  -9.984   9.400  1.00 83.27           N
ATOM   2993  CD2 HIS A 371      19.421 -11.135  10.102  1.00 83.27           C
ATOM   2994  CE1 HIS A 371      19.230  -9.011  10.283  1.00 83.27           C
ATOM   2995  C   HIS A 371      18.015 -12.940  12.761  1.00 83.27           C
ATOM   2996  O   HIS A 371      18.255 -14.136  12.598  1.00 83.27           O
ATOM   2997  N   ARG A 372      16.859 -12.365  12.346  1.00120.11           N
ATOM   2998  CA  ARG A 372      15.860 -13.087  11.607  1.00120.11           C
ATOM   2999  CB  ARG A 372      14.472 -12.427  11.624  1.00120.11           C
ATOM   3000  CG  ARG A 372      13.319 -13.374  11.278  1.00120.11           C
ATOM   3001  CD  ARG A 372      13.456 -14.103   9.940  1.00120.11           C
ATOM   3002  NE  ARG A 372      12.107 -14.642   9.603  1.00120.11           N
ATOM   3003  CZ  ARG A 372      11.737 -15.891  10.010  1.00120.11           C
ATOM   3004  NH1 ARG A 372      12.620 -16.676  10.692  1.00120.11           N
ATOM   3005  NH2 ARG A 372      10.483 -16.354   9.731  1.00120.11           N
ATOM   3006  C   ARG A 372      16.347 -13.115  10.188  1.00120.11           C
ATOM   3007  O   ARG A 372      16.710 -12.087   9.619  1.00120.11           O
ATOM   3008  N   ASP A 373      16.371 -14.328   9.608  1.00126.26           N
ATOM   3009  CA  ASP A 373      16.910 -14.671   8.321  1.00126.26           C
ATOM   3010  CB  ASP A 373      17.018 -16.193   8.149  1.00126.26           C
ATOM   3011  CG  ASP A 373      17.943 -16.744   9.221  1.00126.26           C
ATOM   3012  OD1 ASP A 373      18.629 -15.934   9.900  1.00126.26           O
ATOM   3013  OD2 ASP A 373      17.966 -17.993   9.378  1.00126.26           O
ATOM   3014  C   ASP A 373      16.108 -14.200   7.144  1.00126.26           C
ATOM   3015  O   ASP A 373      16.690 -13.894   6.105  1.00126.26           O
ATOM   3016  N   GLU A 374      14.763 -14.160   7.249  1.00 82.86           N
ATOM   3017  CA  GLU A 374      13.942 -13.900   6.095  1.00 82.86           C
ATOM   3018  CB  GLU A 374      12.439 -13.775   6.401  1.00 82.86           C
ATOM   3019  CG  GLU A 374      11.766 -15.103   6.762  1.00 82.86           C
ATOM   3020  CD  GLU A 374      11.606 -15.914   5.483  1.00 82.86           C
ATOM   3021  OE1 GLU A 374      12.185 -15.504   4.442  1.00 82.86           O
ATOM   3022  OE2 GLU A 374      10.894 -16.952   5.531  1.00 82.86           O
ATOM   3023  C   GLU A 374      14.365 -12.641   5.416  1.00 82.86           C
ATOM   3024  O   GLU A 374      14.640 -11.622   6.045  1.00 82.86           O
ATOM   3025  N   GLU A 375      14.446 -12.720   4.076  1.00 97.18           N
ATOM   3026  CA  GLU A 375      14.839 -11.634   3.234  1.00 97.18           C
ATOM   3027  CB  GLU A 375      14.904 -12.043   1.760  1.00 97.18           C
ATOM   3028  CG  GLU A 375      13.524 -12.442   1.236  1.00 97.18           C
ATOM   3029  CD  GLU A 375      13.673 -12.931  -0.193  1.00 97.18           C
ATOM   3030  OE1 GLU A 375      14.552 -12.392  -0.917  1.00 97.18           O
ATOM   3031  OE2 GLU A 375      12.911 -13.858  -0.576  1.00 97.18           O
ATOM   3032  C   GLU A 375      13.789 -10.576   3.338  1.00 97.18           C
ATOM   3033  O   GLU A 375      14.090  -9.390   3.238  1.00 97.18           O
ATOM   3034  N   VAL A 376      12.518 -10.985   3.520  1.00 84.70           N
ATOM   3035  CA  VAL A 376      11.444 -10.033   3.581  1.00 84.70           C
ATOM   3036  CB  VAL A 376      10.082 -10.666   3.475  1.00 84.70           C
ATOM   3037  CG1 VAL A 376       9.012  -9.591   3.727  1.00 84.70           C
ATOM   3038  CG2 VAL A 376       9.953 -11.339   2.095  1.00 84.70           C
ATOM   3039  C   VAL A 376      11.527  -9.295   4.880  1.00 84.70           C
ATOM   3040  O   VAL A 376      11.054  -9.760   5.915  1.00 84.70           O
ATOM   3041  N   ASN A 377      12.120  -8.084   4.830  1.00144.09           N
ATOM   3042  CA  ASN A 377      12.339  -7.269   5.993  1.00144.09           C
ATOM   3043  CB  ASN A 377      13.806  -6.790   6.032  1.00144.09           C
ATOM   3044  CG  ASN A 377      14.142  -6.045   4.736  1.00144.09           C
ATOM   3045  OD1 ASN A 377      13.279  -5.784   3.900  1.00144.09           O
ATOM   3046  ND2 ASN A 377      15.448  -5.717   4.550  1.00144.09           N
ATOM   3047  C   ASN A 377      11.476  -6.033   5.948  1.00144.09           C
ATOM   3048  O   ASN A 377      11.797  -5.039   6.597  1.00144.09           O
ATOM   3049  N   TYR A 378      10.340  -6.057   5.221  1.00209.06           N
ATOM   3050  CA  TYR A 378       9.524  -4.870   5.134  1.00209.06           C
ATOM   3051  CB  TYR A 378       9.715  -4.121   3.798  1.00209.06           C
ATOM   3052  CG  TYR A 378       9.348  -5.029   2.668  1.00209.06           C
ATOM   3053  CD1 TYR A 378      10.276  -5.897   2.137  1.00209.06           C
ATOM   3054  CD2 TYR A 378       8.077  -5.020   2.137  1.00209.06           C
ATOM   3055  CE1 TYR A 378       9.944  -6.737   1.097  1.00209.06           C
ATOM   3056  CE2 TYR A 378       7.739  -5.855   1.098  1.00209.06           C
ATOM   3057  CZ  TYR A 378       8.672  -6.716   0.575  1.00209.06           C
ATOM   3058  OH  TYR A 378       8.319  -7.572  -0.491  1.00209.06           O
ATOM   3059  C   TYR A 378       8.082  -5.263   5.240  1.00209.06           C
ATOM   3060  O   TYR A 378       7.717  -6.367   4.850  1.00209.06           O
ATOM   3061  N   PHE A 379       7.222  -4.377   5.795  1.00 76.72           N
ATOM   3062  CA  PHE A 379       5.816  -4.674   5.879  1.00 76.72           C
ATOM   3063  CB  PHE A 379       5.407  -5.092   7.302  1.00 76.72           C
ATOM   3064  CG  PHE A 379       4.065  -5.738   7.274  1.00 76.72           C
ATOM   3065  CD1 PHE A 379       3.948  -7.067   6.934  1.00 76.72           C
ATOM   3066  CD2 PHE A 379       2.932  -5.032   7.606  1.00 76.72           C
ATOM   3067  CE1 PHE A 379       2.717  -7.680   6.911  1.00 76.72           C
ATOM   3068  CE2 PHE A 379       1.700  -5.641   7.585  1.00 76.72           C
ATOM   3069  CZ  PHE A 379       1.590  -6.965   7.236  1.00 76.72           C
ATOM   3070  C   PHE A 379       5.097  -3.399   5.543  1.00 76.72           C
ATOM   3071  O   PHE A 379       5.548  -2.334   5.962  1.00 76.72           O
ATOM   3072  N   PRO A 380       4.009  -3.416   4.807  1.00109.29           N
ATOM   3073  CA  PRO A 380       3.432  -4.616   4.258  1.00109.29           C
ATOM   3074  CD  PRO A 380       3.003  -2.387   4.992  1.00109.29           C
ATOM   3075  CB  PRO A 380       1.976  -4.287   3.918  1.00109.29           C
ATOM   3076  CG  PRO A 380       1.892  -2.754   3.999  1.00109.29           C
ATOM   3077  C   PRO A 380       4.200  -5.212   3.126  1.00109.29           C
ATOM   3078  O   PRO A 380       5.032  -4.534   2.524  1.00109.29           O
ATOM   3079  N   SER A 381       3.932  -6.506   2.862  1.00106.50           N
ATOM   3080  CA  SER A 381       4.542  -7.278   1.816  1.00106.50           C
ATOM   3081  CB  SER A 381       5.571  -8.314   2.297  1.00106.50           C
ATOM   3082  OG  SER A 381       6.685  -7.687   2.905  1.00106.50           O
ATOM   3083  C   SER A 381       3.455  -8.127   1.249  1.00106.50           C
ATOM   3084  O   SER A 381       2.317  -8.094   1.714  1.00106.50           O
ATOM   3085  N   ARG A 382       3.785  -8.912   0.206  1.00315.42           N
ATOM   3086  CA  ARG A 382       2.783  -9.768  -0.352  1.00315.42           C
ATOM   3087  CB  ARG A 382       2.849  -9.759  -1.883  1.00315.42           C
ATOM   3088  CG  ARG A 382       1.584 -10.237  -2.583  1.00315.42           C
ATOM   3089  CD  ARG A 382       1.623  -9.964  -4.087  1.00315.42           C
ATOM   3090  NE  ARG A 382       2.042  -8.542  -4.253  1.00315.42           N
ATOM   3091  CZ  ARG A 382       3.372  -8.253  -4.363  1.00315.42           C
ATOM   3092  NH1 ARG A 382       4.286  -9.265  -4.386  1.00315.42           N
ATOM   3093  NH2 ARG A 382       3.791  -6.957  -4.451  1.00315.42           N
ATOM   3094  C   ARG A 382       3.094 -11.163   0.121  1.00315.42           C
ATOM   3095  O   ARG A 382       3.144 -12.102  -0.672  1.00315.42           O
ATOM   3096  N   TYR A 383       3.266 -11.361   1.445  1.00 84.46           N
ATOM   3097  CA  TYR A 383       3.646 -12.683   1.866  1.00 84.46           C
ATOM   3098  CB  TYR A 383       5.150 -12.840   2.154  1.00 84.46           C
ATOM   3099  CG  TYR A 383       5.940 -12.643   0.907  1.00 84.46           C
ATOM   3100  CD1 TYR A 383       6.340 -11.384   0.524  1.00 84.46           C
ATOM   3101  CD2 TYR A 383       6.291 -13.721   0.126  1.00 84.46           C
ATOM   3102  CE1 TYR A 383       7.076 -11.203  -0.623  1.00 84.46           C
ATOM   3103  CE2 TYR A 383       7.027 -13.546  -1.022  1.00 84.46           C
ATOM   3104  CZ  TYR A 383       7.421 -12.284  -1.398  1.00 84.46           C
ATOM   3105  OH  TYR A 383       8.178 -12.101  -2.575  1.00 84.46           O
ATOM   3106  C   TYR A 383       2.977 -13.058   3.159  1.00 84.46           C
ATOM   3107  O   TYR A 383       2.321 -12.250   3.814  1.00 84.46           O
ATOM   3108  N   ASP A 384       3.165 -14.348   3.518  1.00133.62           N
ATOM   3109  CA  ASP A 384       2.734 -15.073   4.689  1.00133.62           C
ATOM   3110  CB  ASP A 384       3.056 -16.574   4.592  1.00133.62           C
ATOM   3111  CG  ASP A 384       2.421 -17.284   5.778  1.00133.62           C
ATOM   3112  OD1 ASP A 384       1.465 -16.719   6.373  1.00133.62           O
ATOM   3113  OD2 ASP A 384       2.892 -18.404   6.112  1.00133.62           O
ATOM   3114  C   ASP A 384       3.416 -14.574   5.937  1.00133.62           C
ATOM   3115  O   ASP A 384       2.852 -14.688   7.023  1.00133.62           O
ATOM   3116  N   PRO A 385       4.598 -14.031   5.887  1.00169.13           N
ATOM   3117  CA  PRO A 385       5.191 -13.631   7.128  1.00169.13           C
ATOM   3118  CD  PRO A 385       5.626 -14.560   4.996  1.00169.13           C
ATOM   3119  CB  PRO A 385       6.641 -13.289   6.806  1.00169.13           C
ATOM   3120  CG  PRO A 385       6.974 -14.300   5.695  1.00169.13           C
ATOM   3121  C   PRO A 385       4.437 -12.632   7.945  1.00169.13           C
ATOM   3122  O   PRO A 385       3.356 -12.190   7.558  1.00169.13           O
ATOM   3123  N   VAL A 386       5.029 -12.338   9.113  1.00 94.28           N
ATOM   3124  CA  VAL A 386       4.590 -11.526  10.208  1.00 94.28           C
ATOM   3125  CB  VAL A 386       5.802 -10.818  10.741  1.00 94.28           C
ATOM   3126  CG1 VAL A 386       5.396  -9.777  11.771  1.00 94.28           C
ATOM   3127  CG2 VAL A 386       6.794 -11.875  11.258  1.00 94.28           C
ATOM   3128  C   VAL A 386       3.578 -10.507   9.784  1.00 94.28           C
ATOM   3129  O   VAL A 386       3.810  -9.695   8.891  1.00 94.28           O
ATOM   3130  N   ARG A 387       2.406 -10.519  10.463  1.00123.55           N
ATOM   3131  CA  ARG A 387       1.371  -9.584  10.134  1.00123.55           C
ATOM   3132  CB  ARG A 387       0.322 -10.182   9.196  1.00123.55           C
ATOM   3133  CG  ARG A 387      -0.721  -9.174   8.747  1.00123.55           C
ATOM   3134  CD  ARG A 387      -1.450  -9.637   7.495  1.00123.55           C
ATOM   3135  NE  ARG A 387      -2.639  -8.761   7.326  1.00123.55           N
ATOM   3136  CZ  ARG A 387      -3.715  -9.231   6.633  1.00123.55           C
ATOM   3137  NH1 ARG A 387      -3.676 -10.478   6.079  1.00123.55           N
ATOM   3138  NH2 ARG A 387      -4.831  -8.457   6.499  1.00123.55           N
ATOM   3139  C   ARG A 387       0.702  -9.102  11.392  1.00123.55           C
ATOM   3140  O   ARG A 387       0.680  -9.788  12.412  1.00123.55           O
ATOM   3141  N   HIS A 388       0.138  -7.878  11.327  1.00 99.62           N
ATOM   3142  CA  HIS A 388      -0.512  -7.211  12.426  1.00 99.62           C
ATOM   3143  ND1 HIS A 388      -1.110  -5.612   9.540  1.00 99.62           N
ATOM   3144  CG  HIS A 388      -1.677  -5.705  10.793  1.00 99.62           C
ATOM   3145  CB  HIS A 388      -0.887  -5.764  12.069  1.00 99.62           C
ATOM   3146  NE2 HIS A 388      -3.308  -5.708   9.233  1.00 99.62           N
ATOM   3147  CD2 HIS A 388      -3.022  -5.761  10.586  1.00 99.62           C
ATOM   3148  CE1 HIS A 388      -2.129  -5.619   8.645  1.00 99.62           C
ATOM   3149  C   HIS A 388      -1.785  -7.916  12.782  1.00 99.62           C
ATOM   3150  O   HIS A 388      -2.466  -8.471  11.920  1.00 99.62           O
ATOM   3151  N   ALA A 389      -2.118  -7.923  14.094  1.00 56.41           N
ATOM   3152  CA  ALA A 389      -3.351  -8.495  14.560  1.00 56.41           C
ATOM   3153  CB  ALA A 389      -3.167  -9.492  15.718  1.00 56.41           C
ATOM   3154  C   ALA A 389      -4.187  -7.364  15.075  1.00 56.41           C
ATOM   3155  O   ALA A 389      -3.908  -6.771  16.115  1.00 56.41           O
ATOM   3156  N   GLU A 390      -5.309  -7.113  14.391  1.00116.43           N
ATOM   3157  CA  GLU A 390      -6.157  -5.990  14.653  1.00116.43           C
ATOM   3158  CB  GLU A 390      -7.379  -5.904  13.718  1.00116.43           C
ATOM   3159  CG  GLU A 390      -8.272  -4.704  14.049  1.00116.43           C
ATOM   3160  CD  GLU A 390      -9.164  -4.382  12.859  1.00116.43           C
ATOM   3161  OE1 GLU A 390      -9.710  -5.334  12.241  1.00116.43           O
ATOM   3162  OE2 GLU A 390      -9.297  -3.168  12.548  1.00116.43           O
ATOM   3163  C   GLU A 390      -6.676  -6.032  16.048  1.00116.43           C
ATOM   3164  O   GLU A 390      -6.948  -4.989  16.633  1.00116.43           O
ATOM   3165  N   LYS A 391      -6.839  -7.232  16.615  1.00132.36           N
ATOM   3166  CA  LYS A 391      -7.391  -7.407  17.926  1.00132.36           C
ATOM   3167  CB  LYS A 391      -7.494  -8.883  18.342  1.00132.36           C
ATOM   3168  CG  LYS A 391      -8.482  -9.678  17.491  1.00132.36           C
ATOM   3169  CD  LYS A 391      -9.916  -9.159  17.577  1.00132.36           C
ATOM   3170  CE  LYS A 391     -10.871  -9.868  16.616  1.00132.36           C
ATOM   3171  NZ  LYS A 391     -12.271  -9.635  17.034  1.00132.36           N
ATOM   3172  C   LYS A 391      -6.521  -6.735  18.935  1.00132.36           C
ATOM   3173  O   LYS A 391      -6.998  -6.388  20.017  1.00132.36           O
ATOM   3174  N   TYR A 392      -5.224  -6.499  18.631  1.00154.52           N
ATOM   3175  CA  TYR A 392      -4.383  -5.953  19.668  1.00154.52           C
ATOM   3176  CB  TYR A 392      -2.963  -6.564  19.671  1.00154.52           C
ATOM   3177  CG  TYR A 392      -2.977  -7.980  20.156  1.00154.52           C
ATOM   3178  CD1 TYR A 392      -3.198  -9.039  19.304  1.00154.52           C
ATOM   3179  CD2 TYR A 392      -2.749  -8.253  21.486  1.00154.52           C
ATOM   3180  CE1 TYR A 392      -3.200 -10.337  19.770  1.00154.52           C
ATOM   3181  CE2 TYR A 392      -2.750  -9.544  21.961  1.00154.52           C
ATOM   3182  CZ  TYR A 392      -2.977 -10.591  21.103  1.00154.52           C
ATOM   3183  OH  TYR A 392      -2.978 -11.916  21.591  1.00154.52           O
ATOM   3184  C   TYR A 392      -4.171  -4.447  19.608  1.00154.52           C
ATOM   3185  O   TYR A 392      -3.211  -3.999  20.237  1.00154.52           O
ATOM   3186  N   PRO A 393      -4.986  -3.610  18.997  1.00151.67           N
ATOM   3187  CA  PRO A 393      -4.699  -2.194  18.998  1.00151.67           C
ATOM   3188  CD  PRO A 393      -6.429  -3.769  19.088  1.00151.67           C
ATOM   3189  CB  PRO A 393      -5.853  -1.562  18.243  1.00151.67           C
ATOM   3190  CG  PRO A 393      -7.049  -2.410  18.708  1.00151.67           C
ATOM   3191  C   PRO A 393      -4.745  -1.648  20.369  1.00151.67           C
ATOM   3192  O   PRO A 393      -5.579  -2.088  21.151  1.00151.67           O
ATOM   3193  N   ILE A 394      -3.890  -0.671  20.685  1.00119.95           N
ATOM   3194  CA  ILE A 394      -4.075  -0.039  21.950  1.00119.95           C
ATOM   3195  CB  ILE A 394      -2.883   0.771  22.390  1.00119.95           C
ATOM   3196  CG1 ILE A 394      -3.129   1.407  23.769  1.00119.95           C
ATOM   3197  CG2 ILE A 394      -2.536   1.775  21.280  1.00119.95           C
ATOM   3198  CD1 ILE A 394      -1.899   2.115  24.341  1.00119.95           C
ATOM   3199  C   ILE A 394      -5.238   0.881  21.738  1.00119.95           C
ATOM   3200  O   ILE A 394      -5.266   1.653  20.781  1.00119.95           O
ATOM   3201  N   PRO A 395      -6.217   0.807  22.594  1.00102.83           N
ATOM   3202  CA  PRO A 395      -7.397   1.609  22.409  1.00102.83           C
ATOM   3203  CD  PRO A 395      -6.517  -0.450  23.259  1.00102.83           C
ATOM   3204  CB  PRO A 395      -8.454   1.020  23.337  1.00102.83           C
ATOM   3205  CG  PRO A 395      -8.043  -0.459  23.457  1.00102.83           C
ATOM   3206  C   PRO A 395      -7.137   3.059  22.649  1.00102.83           C
ATOM   3207  O   PRO A 395      -6.149   3.402  23.295  1.00102.83           O
ATOM   3208  N   SER A 396      -8.017   3.926  22.115  1.00 85.42           N
ATOM   3209  CA  SER A 396      -7.876   5.343  22.267  1.00 85.42           C
ATOM   3210  CB  SER A 396      -8.921   6.146  21.476  1.00 85.42           C
ATOM   3211  OG  SER A 396      -8.824   5.861  20.091  1.00 85.42           O
ATOM   3212  C   SER A 396      -8.111   5.691  23.705  1.00 85.42           C
ATOM   3213  O   SER A 396      -8.789   4.964  24.429  1.00 85.42           O
ATOM   3214  N   ASN A 397      -7.531   6.827  24.151  1.00 90.46           N
ATOM   3215  CA  ASN A 397      -7.729   7.324  25.487  1.00 90.46           C
ATOM   3216  CB  ASN A 397      -6.456   7.301  26.356  1.00 90.46           C
ATOM   3217  CG  ASN A 397      -6.861   7.469  27.817  1.00 90.46           C
ATOM   3218  OD1 ASN A 397      -8.046   7.515  28.143  1.00 90.46           O
ATOM   3219  ND2 ASN A 397      -5.851   7.569  28.725  1.00 90.46           N
ATOM   3220  C   ASN A 397      -8.163   8.760  25.334  1.00 90.46           C
ATOM   3221  O   ASN A 397      -7.978   9.356  24.276  1.00 90.46           O
ATOM   3222  N   VAL A 398      -8.761   9.356  26.390  1.00118.80           N
ATOM   3223  CA  VAL A 398      -9.324  10.686  26.311  1.00118.80           C
ATOM   3224  CB  VAL A 398     -10.397  10.933  27.332  1.00118.80           C
ATOM   3225  CG1 VAL A 398     -11.557   9.953  27.086  1.00118.80           C
ATOM   3226  CG2 VAL A 398      -9.769  10.826  28.733  1.00118.80           C
ATOM   3227  C   VAL A 398      -8.296  11.760  26.541  1.00118.80           C
ATOM   3228  O   VAL A 398      -7.280  11.540  27.198  1.00118.80           O
ATOM   3229  N   LEU A 399      -8.527  12.959  25.946  1.00106.24           N
ATOM   3230  CA  LEU A 399      -7.724  14.129  26.219  1.00106.24           C
ATOM   3231  CB  LEU A 399      -6.689  14.508  25.150  1.00106.24           C
ATOM   3232  CG  LEU A 399      -5.436  13.614  25.209  1.00106.24           C
ATOM   3233  CD1 LEU A 399      -4.424  13.996  24.125  1.00106.24           C
ATOM   3234  CD2 LEU A 399      -4.806  13.643  26.609  1.00106.24           C
ATOM   3235  C   LEU A 399      -8.620  15.316  26.466  1.00106.24           C
ATOM   3236  O   LEU A 399      -9.706  15.407  25.894  1.00106.24           O
ATOM   3237  N   ASN A 400      -8.209  16.243  27.374  1.00202.39           N
ATOM   3238  CA  ASN A 400      -9.044  17.394  27.622  1.00202.39           C
ATOM   3239  CB  ASN A 400      -9.869  17.260  28.922  1.00202.39           C
ATOM   3240  CG  ASN A 400     -10.886  18.399  29.020  1.00202.39           C
ATOM   3241  OD1 ASN A 400     -10.611  19.460  29.579  1.00202.39           O
ATOM   3242  ND2 ASN A 400     -12.109  18.169  28.473  1.00202.39           N
ATOM   3243  C   ASN A 400      -8.234  18.680  27.738  1.00202.39           C
ATOM   3244  O   ASN A 400      -8.203  19.262  28.822  1.00202.39           O
ATOM   3245  N   GLY A 401      -7.622  19.209  26.636  1.00 78.55           N
ATOM   3246  CA  GLY A 401      -6.893  20.471  26.735  1.00 78.55           C
ATOM   3247  C   GLY A 401      -6.233  20.894  25.408  1.00 78.55           C
ATOM   3248  O   GLY A 401      -6.338  20.177  24.413  1.00 78.55           O
ATOM   3249  N   LYS A 402      -5.606  22.126  25.376  1.00248.28           N
ATOM   3250  CA  LYS A 402      -4.881  22.826  24.301  1.00248.28           C
ATOM   3251  CB  LYS A 402      -4.687  24.317  24.633  1.00248.28           C
ATOM   3252  CG  LYS A 402      -5.999  25.108  24.602  1.00248.28           C
ATOM   3253  CD  LYS A 402      -7.016  24.657  25.653  1.00248.28           C
ATOM   3254  CE  LYS A 402      -6.554  24.893  27.092  1.00248.28           C
ATOM   3255  NZ  LYS A 402      -6.360  26.340  27.327  1.00248.28           N
ATOM   3256  C   LYS A 402      -3.477  22.255  23.851  1.00248.28           C
ATOM   3257  O   LYS A 402      -3.371  21.995  22.655  1.00248.28           O
ATOM   3258  N   ARG A 403      -2.390  22.118  24.722  1.00215.93           N
ATOM   3259  CA  ARG A 403      -1.032  21.467  24.621  1.00215.93           C
ATOM   3260  CB  ARG A 403      -0.804  20.580  23.372  1.00215.93           C
ATOM   3261  CG  ARG A 403      -0.670  21.252  22.003  1.00215.93           C
ATOM   3262  CD  ARG A 403       0.774  21.648  21.673  1.00215.93           C
ATOM   3263  NE  ARG A 403       0.851  21.841  20.197  1.00215.93           N
ATOM   3264  CZ  ARG A 403       2.060  21.965  19.573  1.00215.93           C
ATOM   3265  NH1 ARG A 403       3.216  21.896  20.296  1.00215.93           N
ATOM   3266  NH2 ARG A 403       2.112  22.158  18.223  1.00215.93           N
ATOM   3267  C   ARG A 403       0.179  22.403  24.834  1.00215.93           C
ATOM   3268  O   ARG A 403       0.315  23.403  24.129  1.00215.93           O
ATOM   3269  N   ASP A 404       1.124  22.084  25.798  1.00151.02           N
ATOM   3270  CA  ASP A 404       2.330  22.869  26.084  1.00151.02           C
ATOM   3271  CB  ASP A 404       2.109  24.395  26.039  1.00151.02           C
ATOM   3272  CG  ASP A 404       1.092  24.777  27.102  1.00151.02           C
ATOM   3273  OD1 ASP A 404       0.352  23.869  27.565  1.00151.02           O
ATOM   3274  OD2 ASP A 404       1.033  25.985  27.459  1.00151.02           O
ATOM   3275  C   ASP A 404       2.917  22.523  27.445  1.00151.02           C
ATOM   3276  O   ASP A 404       2.573  21.502  28.037  1.00151.02           O
ATOM   3277  N   LYS A 405       3.856  23.366  27.963  1.00153.61           N
ATOM   3278  CA  LYS A 405       4.498  23.168  29.251  1.00153.61           C
ATOM   3279  CB  LYS A 405       5.703  24.091  29.488  1.00153.61           C
ATOM   3280  CG  LYS A 405       6.744  24.172  28.376  1.00153.61           C
ATOM   3281  CD  LYS A 405       7.530  22.891  28.122  1.00153.61           C
ATOM   3282  CE  LYS A 405       8.767  23.146  27.261  1.00153.61           C
ATOM   3283  NZ  LYS A 405       9.303  21.871  26.745  1.00153.61           N
ATOM   3284  C   LYS A 405       3.546  23.689  30.284  1.00153.61           C
ATOM   3285  O   LYS A 405       3.551  24.891  30.556  1.00153.61           O
ATOM   3286  N   GLN A 406       2.733  22.819  30.920  1.00105.51           N
ATOM   3287  CA  GLN A 406       1.813  23.365  31.878  1.00105.51           C
ATOM   3288  CB  GLN A 406       0.372  23.524  31.363  1.00105.51           C
ATOM   3289  CG  GLN A 406      -0.532  24.222  32.385  1.00105.51           C
ATOM   3290  CD  GLN A 406      -1.897  24.462  31.757  1.00105.51           C
ATOM   3291  OE1 GLN A 406      -2.026  25.202  30.783  1.00105.51           O
ATOM   3292  NE2 GLN A 406      -2.950  23.828  32.340  1.00105.51           N
ATOM   3293  C   GLN A 406       1.766  22.512  33.106  1.00105.51           C
ATOM   3294  O   GLN A 406       1.386  21.344  33.055  1.00105.51           O
ATOM   3295  N   VAL A 407       2.107  23.113  34.263  1.00 39.45           N
ATOM   3296  CA  VAL A 407       2.141  22.416  35.518  1.00 39.45           C
ATOM   3297  CB  VAL A 407       2.839  23.174  36.612  1.00 39.45           C
ATOM   3298  CG1 VAL A 407       2.637  22.411  37.933  1.00 39.45           C
ATOM   3299  CG2 VAL A 407       4.317  23.359  36.228  1.00 39.45           C
ATOM   3300  C   VAL A 407       0.743  22.158  35.992  1.00 39.45           C
ATOM   3301  O   VAL A 407      -0.154  22.981  35.813  1.00 39.45           O
ATOM   3302  N   ILE A 408       0.540  20.987  36.634  1.00 83.18           N
ATOM   3303  CA  ILE A 408      -0.744  20.585  37.143  1.00 83.18           C
ATOM   3304  CB  ILE A 408      -0.774  19.189  37.702  1.00 83.18           C
ATOM   3305  CG1 ILE A 408       0.186  19.045  38.893  1.00 83.18           C
ATOM   3306  CG2 ILE A 408      -0.490  18.216  36.543  1.00 83.18           C
ATOM   3307  CD1 ILE A 408       0.043  17.718  39.638  1.00 83.18           C
ATOM   3308  C   ILE A 408      -1.216  21.563  38.179  1.00 83.18           C
ATOM   3309  O   ILE A 408      -0.415  22.193  38.867  1.00 83.18           O
ATOM   3310  N   VAL A 409      -2.554  21.756  38.246  1.00115.62           N
ATOM   3311  CA  VAL A 409      -3.200  22.729  39.093  1.00115.62           C
ATOM   3312  CB  VAL A 409      -4.682  22.837  38.842  1.00115.62           C
ATOM   3313  CG1 VAL A 409      -4.902  23.359  37.413  1.00115.62           C
ATOM   3314  CG2 VAL A 409      -5.349  21.476  39.120  1.00115.62           C
ATOM   3315  C   VAL A 409      -3.033  22.496  40.569  1.00115.62           C
ATOM   3316  O   VAL A 409      -2.591  23.401  41.275  1.00115.62           O
ATOM   3317  N   LYS A 410      -3.350  21.299  41.109  1.00133.70           N
ATOM   3318  CA  LYS A 410      -3.258  21.247  42.547  1.00133.70           C
ATOM   3319  CB  LYS A 410      -4.508  20.712  43.272  1.00133.70           C
ATOM   3320  CG  LYS A 410      -5.682  21.694  43.240  1.00133.70           C
ATOM   3321  CD  LYS A 410      -6.943  21.199  43.951  1.00133.70           C
ATOM   3322  CE  LYS A 410      -7.480  19.854  43.461  1.00133.70           C
ATOM   3323  NZ  LYS A 410      -8.786  19.587  44.104  1.00133.70           N
ATOM   3324  C   LYS A 410      -2.092  20.422  42.975  1.00133.70           C
ATOM   3325  O   LYS A 410      -2.169  19.194  43.033  1.00133.70           O
ATOM   3326  N   GLU A 411      -0.984  21.120  43.305  1.00 66.54           N
ATOM   3327  CA  GLU A 411       0.245  20.518  43.735  1.00 66.54           C
ATOM   3328  CB  GLU A 411       1.418  21.508  43.876  1.00 66.54           C
ATOM   3329  CG  GLU A 411       1.994  22.043  42.567  1.00 66.54           C
ATOM   3330  CD  GLU A 411       3.233  22.864  42.912  1.00 66.54           C
ATOM   3331  OE1 GLU A 411       3.191  23.612  43.926  1.00 66.54           O
ATOM   3332  OE2 GLU A 411       4.240  22.752  42.165  1.00 66.54           O
ATOM   3333  C   GLU A 411       0.107  19.894  45.087  1.00 66.54           C
ATOM   3334  O   GLU A 411       0.561  18.769  45.286  1.00 66.54           O
ATOM   3335  N   ASN A 412      -0.504  20.620  46.051  1.00 69.85           N
ATOM   3336  CA  ASN A 412      -0.676  20.132  47.397  1.00 69.85           C
ATOM   3337  CB  ASN A 412      -1.773  19.057  47.499  1.00 69.85           C
ATOM   3338  CG  ASN A 412      -2.128  18.843  48.964  1.00 69.85           C
ATOM   3339  OD1 ASN A 412      -1.379  18.226  49.720  1.00 69.85           O
ATOM   3340  ND2 ASN A 412      -3.308  19.372  49.381  1.00 69.85           N
ATOM   3341  C   ASN A 412       0.629  19.561  47.885  1.00 69.85           C
ATOM   3342  O   ASN A 412       0.704  18.397  48.273  1.00 69.85           O
ATOM   3343  N   ASN A 413       1.703  20.372  47.858  1.00 79.59           N
ATOM   3344  CA  ASN A 413       3.028  19.912  48.186  1.00 79.59           C
ATOM   3345  CB  ASN A 413       4.108  20.989  47.970  1.00 79.59           C
ATOM   3346  CG  ASN A 413       4.295  21.182  46.474  1.00 79.59           C
ATOM   3347  OD1 ASN A 413       4.014  20.284  45.683  1.00 79.59           O
ATOM   3348  ND2 ASN A 413       4.789  22.382  46.068  1.00 79.59           N
ATOM   3349  C   ASN A 413       3.155  19.468  49.611  1.00 79.59           C
ATOM   3350  O   ASN A 413       3.923  18.551  49.902  1.00 79.59           O
ATOM   3351  N   PHE A 414       2.547  20.228  50.539  1.00124.33           N
ATOM   3352  CA  PHE A 414       2.623  20.010  51.961  1.00124.33           C
ATOM   3353  CB  PHE A 414       2.744  21.359  52.664  1.00124.33           C
ATOM   3354  CG  PHE A 414       3.899  22.004  51.966  1.00124.33           C
ATOM   3355  CD1 PHE A 414       5.194  21.603  52.211  1.00124.33           C
ATOM   3356  CD2 PHE A 414       3.683  23.033  51.077  1.00124.33           C
ATOM   3357  CE1 PHE A 414       6.249  22.209  51.569  1.00124.33           C
ATOM   3358  CE2 PHE A 414       4.734  23.643  50.432  1.00124.33           C
ATOM   3359  CZ  PHE A 414       6.021  23.230  50.677  1.00124.33           C
ATOM   3360  C   PHE A 414       1.531  19.189  52.605  1.00124.33           C
ATOM   3361  O   PHE A 414       1.763  18.545  53.631  1.00124.33           O
ATOM   3362  N   LYS A 415       0.290  19.244  52.075  1.00 89.35           N
ATOM   3363  CA  LYS A 415      -0.824  18.693  52.804  1.00 89.35           C
ATOM   3364  CB  LYS A 415      -2.184  19.080  52.204  1.00 89.35           C
ATOM   3365  CG  LYS A 415      -3.315  18.957  53.226  1.00 89.35           C
ATOM   3366  CD  LYS A 415      -4.559  19.767  52.859  1.00 89.35           C
ATOM   3367  CE  LYS A 415      -5.588  19.856  53.984  1.00 89.35           C
ATOM   3368  NZ  LYS A 415      -6.810  20.530  53.487  1.00 89.35           N
ATOM   3369  C   LYS A 415      -0.757  17.207  52.989  1.00 89.35           C
ATOM   3370  O   LYS A 415      -0.931  16.721  54.105  1.00 89.35           O
ATOM   3371  N   GLN A 416      -0.503  16.434  51.919  1.00 66.47           N
ATOM   3372  CA  GLN A 416      -0.449  15.005  52.070  1.00 66.47           C
ATOM   3373  CB  GLN A 416      -0.364  14.235  50.744  1.00 66.47           C
ATOM   3374  CG  GLN A 416      -0.536  12.730  50.958  1.00 66.47           C
ATOM   3375  CD  GLN A 416      -0.492  12.027  49.611  1.00 66.47           C
ATOM   3376  OE1 GLN A 416       0.566  11.888  48.999  1.00 66.47           O
ATOM   3377  NE2 GLN A 416      -1.680  11.559  49.140  1.00 66.47           N
ATOM   3378  C   GLN A 416       0.730  14.611  52.915  1.00 66.47           C
ATOM   3379  O   GLN A 416       0.623  13.683  53.716  1.00 66.47           O
ATOM   3380  N   PRO A 417       1.859  15.261  52.776  1.00132.94           N
ATOM   3381  CA  PRO A 417       2.981  14.920  53.603  1.00132.94           C
ATOM   3382  CD  PRO A 417       2.292  15.822  51.503  1.00132.94           C
ATOM   3383  CB  PRO A 417       4.143  15.764  53.091  1.00132.94           C
ATOM   3384  CG  PRO A 417       3.827  15.915  51.591  1.00132.94           C
ATOM   3385  C   PRO A 417       2.650  15.088  55.049  1.00132.94           C
ATOM   3386  O   PRO A 417       3.151  14.313  55.861  1.00132.94           O
ATOM   3387  N   GLY A 418       1.816  16.084  55.397  1.00 26.22           N
ATOM   3388  CA  GLY A 418       1.439  16.273  56.766  1.00 26.22           C
ATOM   3389  C   GLY A 418       0.651  15.086  57.222  1.00 26.22           C
ATOM   3390  O   GLY A 418       0.869  14.573  58.317  1.00 26.22           O
ATOM   3391  N   GLU A 419      -0.284  14.611  56.376  1.00 43.98           N
ATOM   3392  CA  GLU A 419      -1.133  13.509  56.734  1.00 43.98           C
ATOM   3393  CB  GLU A 419      -2.147  13.163  55.629  1.00 43.98           C
ATOM   3394  CG  GLU A 419      -3.242  14.219  55.447  1.00 43.98           C
ATOM   3395  CD  GLU A 419      -3.973  13.911  54.147  1.00 43.98           C
ATOM   3396  OE1 GLU A 419      -3.270  13.748  53.114  1.00 43.98           O
ATOM   3397  OE2 GLU A 419      -5.229  13.833  54.163  1.00 43.98           O
ATOM   3398  C   GLU A 419      -0.270  12.308  56.957  1.00 43.98           C
ATOM   3399  O   GLU A 419      -0.480  11.552  57.904  1.00 43.98           O
ATOM   3400  N   ARG A 420       0.750  12.115  56.099  1.00151.75           N
ATOM   3401  CA  ARG A 420       1.595  10.965  56.221  1.00151.75           C
ATOM   3402  CB  ARG A 420       2.684  10.888  55.142  1.00151.75           C
ATOM   3403  CG  ARG A 420       3.329   9.506  55.057  1.00151.75           C
ATOM   3404  CD  ARG A 420       2.394   8.444  54.470  1.00151.75           C
ATOM   3405  NE  ARG A 420       1.315   8.165  55.459  1.00151.75           N
ATOM   3406  CZ  ARG A 420       0.173   7.544  55.044  1.00151.75           C
ATOM   3407  NH1 ARG A 420      -0.011   7.280  53.717  1.00151.75           N
ATOM   3408  NH2 ARG A 420      -0.780   7.177  55.950  1.00151.75           N
ATOM   3409  C   ARG A 420       2.281  11.018  57.550  1.00151.75           C
ATOM   3410  O   ARG A 420       2.407   9.998  58.225  1.00151.75           O
ATOM   3411  N   TYR A 421       2.739  12.214  57.969  1.00147.04           N
ATOM   3412  CA  TYR A 421       3.429  12.320  59.226  1.00147.04           C
ATOM   3413  CB  TYR A 421       3.959  13.741  59.501  1.00147.04           C
ATOM   3414  CG  TYR A 421       4.438  13.813  60.914  1.00147.04           C
ATOM   3415  CD1 TYR A 421       5.675  13.324  61.270  1.00147.04           C
ATOM   3416  CD2 TYR A 421       3.636  14.357  61.892  1.00147.04           C
ATOM   3417  CE1 TYR A 421       6.107  13.394  62.573  1.00147.04           C
ATOM   3418  CE2 TYR A 421       4.062  14.431  63.197  1.00147.04           C
ATOM   3419  CZ  TYR A 421       5.302  13.951  63.539  1.00147.04           C
ATOM   3420  OH  TYR A 421       5.743  14.026  64.875  1.00147.04           O
ATOM   3421  C   TYR A 421       2.513  11.938  60.349  1.00147.04           C
ATOM   3422  O   TYR A 421       2.886  11.160  61.227  1.00147.04           O
ATOM   3423  N   ARG A 422       1.272  12.452  60.328  1.00136.34           N
ATOM   3424  CA  ARG A 422       0.339  12.229  61.396  1.00136.34           C
ATOM   3425  CB  ARG A 422      -0.954  13.048  61.242  1.00136.34           C
ATOM   3426  CG  ARG A 422      -0.694  14.558  61.234  1.00136.34           C
ATOM   3427  CD  ARG A 422      -1.936  15.408  61.504  1.00136.34           C
ATOM   3428  NE  ARG A 422      -1.543  16.834  61.323  1.00136.34           N
ATOM   3429  CZ  ARG A 422      -1.720  17.441  60.113  1.00136.34           C
ATOM   3430  NH1 ARG A 422      -2.337  16.773  59.094  1.00136.34           N
ATOM   3431  NH2 ARG A 422      -1.287  18.723  59.927  1.00136.34           N
ATOM   3432  C   ARG A 422      -0.013  10.781  61.483  1.00136.34           C
ATOM   3433  O   ARG A 422      -0.297  10.275  62.565  1.00136.34           O
ATOM   3434  N   SER A 423      -0.036  10.078  60.340  1.00 83.03           N
ATOM   3435  CA  SER A 423      -0.438   8.700  60.334  1.00 83.03           C
ATOM   3436  CB  SER A 423      -0.636   8.139  58.915  1.00 83.03           C
ATOM   3437  OG  SER A 423       0.593   8.134  58.206  1.00 83.03           O
ATOM   3438  C   SER A 423       0.560   7.828  61.049  1.00 83.03           C
ATOM   3439  O   SER A 423       0.202   6.738  61.492  1.00 83.03           O
ATOM   3440  N   PHE A 424       1.825   8.278  61.206  1.00110.42           N
ATOM   3441  CA  PHE A 424       2.856   7.444  61.775  1.00110.42           C
ATOM   3442  CB  PHE A 424       4.290   7.995  61.657  1.00110.42           C
ATOM   3443  CG  PHE A 424       4.726   7.959  60.235  1.00110.42           C
ATOM   3444  CD1 PHE A 424       5.155   6.782  59.665  1.00110.42           C
ATOM   3445  CD2 PHE A 424       4.696   9.101  59.469  1.00110.42           C
ATOM   3446  CE1 PHE A 424       5.557   6.747  58.350  1.00110.42           C
ATOM   3447  CE2 PHE A 424       5.099   9.072  58.154  1.00110.42           C
ATOM   3448  CZ  PHE A 424       5.531   7.893  57.593  1.00110.42           C
ATOM   3449  C   PHE A 424       2.660   7.194  63.240  1.00110.42           C
ATOM   3450  O   PHE A 424       1.988   7.942  63.948  1.00110.42           O
ATOM   3451  N   ASP A 425       3.258   6.073  63.701  1.00102.29           N
ATOM   3452  CA  ASP A 425       3.295   5.671  65.079  1.00102.29           C
ATOM   3453  CB  ASP A 425       3.737   4.198  65.248  1.00102.29           C
ATOM   3454  CG  ASP A 425       3.746   3.781  66.716  1.00102.29           C
ATOM   3455  OD1 ASP A 425       2.650   3.465  67.249  1.00102.29           O
ATOM   3456  OD2 ASP A 425       4.850   3.775  67.324  1.00102.29           O
ATOM   3457  C   ASP A 425       4.327   6.550  65.712  1.00102.29           C
ATOM   3458  O   ASP A 425       5.096   7.215  65.020  1.00102.29           O
ATOM   3459  N   PRO A 426       4.340   6.610  67.012  1.00 92.48           N
ATOM   3460  CA  PRO A 426       5.310   7.446  67.658  1.00 92.48           C
ATOM   3461  CD  PRO A 426       3.098   6.543  67.766  1.00 92.48           C
ATOM   3462  CB  PRO A 426       4.869   7.532  69.115  1.00 92.48           C
ATOM   3463  CG  PRO A 426       3.336   7.392  69.025  1.00 92.48           C
ATOM   3464  C   PRO A 426       6.720   6.993  67.436  1.00 92.48           C
ATOM   3465  O   PRO A 426       7.618   7.834  67.444  1.00 92.48           O
ATOM   3466  N   ALA A 427       6.948   5.680  67.246  1.00 19.61           N
ATOM   3467  CA  ALA A 427       8.282   5.206  67.025  1.00 19.61           C
ATOM   3468  CB  ALA A 427       8.359   3.675  66.885  1.00 19.61           C
ATOM   3469  C   ALA A 427       8.770   5.791  65.738  1.00 19.61           C
ATOM   3470  O   ALA A 427       9.915   6.229  65.636  1.00 19.61           O
ATOM   3471  N   ARG A 428       7.893   5.809  64.718  1.00131.00           N
ATOM   3472  CA  ARG A 428       8.257   6.316  63.427  1.00131.00           C
ATOM   3473  CB  ARG A 428       7.156   6.146  62.368  1.00131.00           C
ATOM   3474  CG  ARG A 428       6.897   4.694  61.967  1.00131.00           C
ATOM   3475  CD  ARG A 428       8.124   3.994  61.379  1.00131.00           C
ATOM   3476  NE  ARG A 428       8.768   3.236  62.487  1.00131.00           N
ATOM   3477  CZ  ARG A 428       8.292   1.998  62.810  1.00131.00           C
ATOM   3478  NH1 ARG A 428       7.234   1.479  62.123  1.00131.00           N
ATOM   3479  NH2 ARG A 428       8.868   1.283  63.822  1.00131.00           N
ATOM   3480  C   ARG A 428       8.547   7.783  63.506  1.00131.00           C
ATOM   3481  O   ARG A 428       9.511   8.264  62.913  1.00131.00           O
ATOM   3482  N   GLN A 429       7.716   8.534  64.251  1.00 46.54           N
ATOM   3483  CA  GLN A 429       7.858   9.961  64.325  1.00 46.54           C
ATOM   3484  CB  GLN A 429       6.764  10.619  65.181  1.00 46.54           C
ATOM   3485  CG  GLN A 429       5.355  10.429  64.617  1.00 46.54           C
ATOM   3486  CD  GLN A 429       4.381  11.124  65.553  1.00 46.54           C
ATOM   3487  OE1 GLN A 429       4.655  11.300  66.739  1.00 46.54           O
ATOM   3488  NE2 GLN A 429       3.205  11.534  65.007  1.00 46.54           N
ATOM   3489  C   GLN A 429       9.170  10.290  64.965  1.00 46.54           C
ATOM   3490  O   GLN A 429       9.833  11.256  64.588  1.00 46.54           O
ATOM   3491  N   GLU A 430       9.549   9.504  65.988  1.00 43.20           N
ATOM   3492  CA  GLU A 430      10.771   9.688  66.717  1.00 43.20           C
ATOM   3493  CB  GLU A 430      10.868   8.654  67.856  1.00 43.20           C
ATOM   3494  CG  GLU A 430      12.153   8.686  68.682  1.00 43.20           C
ATOM   3495  CD  GLU A 430      12.112   7.476  69.610  1.00 43.20           C
ATOM   3496  OE1 GLU A 430      11.028   6.841  69.705  1.00 43.20           O
ATOM   3497  OE2 GLU A 430      13.167   7.163  70.224  1.00 43.20           O
ATOM   3498  C   GLU A 430      11.930   9.452  65.799  1.00 43.20           C
ATOM   3499  O   GLU A 430      12.862  10.253  65.739  1.00 43.20           O
ATOM   3500  N   ARG A 431      11.884   8.343  65.037  1.00 81.53           N
ATOM   3501  CA  ARG A 431      12.976   7.996  64.172  1.00 81.53           C
ATOM   3502  CB  ARG A 431      12.848   6.591  63.566  1.00 81.53           C
ATOM   3503  CG  ARG A 431      13.263   5.536  64.588  1.00 81.53           C
ATOM   3504  CD  ARG A 431      14.733   5.693  64.977  1.00 81.53           C
ATOM   3505  NE  ARG A 431      15.024   4.837  66.161  1.00 81.53           N
ATOM   3506  CZ  ARG A 431      15.035   5.393  67.408  1.00 81.53           C
ATOM   3507  NH1 ARG A 431      14.710   6.709  67.570  1.00 81.53           N
ATOM   3508  NH2 ARG A 431      15.388   4.641  68.491  1.00 81.53           N
ATOM   3509  C   ARG A 431      13.130   9.008  63.082  1.00 81.53           C
ATOM   3510  O   ARG A 431      14.250   9.356  62.715  1.00 81.53           O
ATOM   3511  N   PHE A 432      12.008   9.520  62.545  1.00 47.48           N
ATOM   3512  CA  PHE A 432      12.045  10.460  61.460  1.00 47.48           C
ATOM   3513  CB  PHE A 432      10.627  10.846  60.990  1.00 47.48           C
ATOM   3514  CG  PHE A 432      10.701  11.680  59.754  1.00 47.48           C
ATOM   3515  CD1 PHE A 432      10.979  11.102  58.535  1.00 47.48           C
ATOM   3516  CD2 PHE A 432      10.455  13.033  59.804  1.00 47.48           C
ATOM   3517  CE1 PHE A 432      11.036  11.866  57.393  1.00 47.48           C
ATOM   3518  CE2 PHE A 432      10.511  13.802  58.664  1.00 47.48           C
ATOM   3519  CZ  PHE A 432      10.803  13.218  57.455  1.00 47.48           C
ATOM   3520  C   PHE A 432      12.757  11.696  61.917  1.00 47.48           C
ATOM   3521  O   PHE A 432      13.579  12.259  61.195  1.00 47.48           O
ATOM   3522  N   ILE A 433      12.459  12.149  63.147  1.00 47.48           N
ATOM   3523  CA  ILE A 433      13.041  13.344  63.687  1.00 47.48           C
ATOM   3524  CB  ILE A 433      12.447  13.673  65.024  1.00 47.48           C
ATOM   3525  CG1 ILE A 433      10.988  14.136  64.852  1.00 47.48           C
ATOM   3526  CG2 ILE A 433      13.369  14.669  65.729  1.00 47.48           C
ATOM   3527  CD1 ILE A 433      10.208  14.255  66.159  1.00 47.48           C
ATOM   3528  C   ILE A 433      14.527  13.192  63.831  1.00 47.48           C
ATOM   3529  O   ILE A 433      15.283  14.077  63.435  1.00 47.48           O
ATOM   3530  N   GLN A 434      14.996  12.061  64.387  1.00 88.87           N
ATOM   3531  CA  GLN A 434      16.402  11.886  64.620  1.00 88.87           C
ATOM   3532  CB  GLN A 434      16.698  10.639  65.472  1.00 88.87           C
ATOM   3533  CG  GLN A 434      16.003  10.698  66.838  1.00 88.87           C
ATOM   3534  CD  GLN A 434      16.372  12.016  67.514  1.00 88.87           C
ATOM   3535  OE1 GLN A 434      17.531  12.260  67.845  1.00 88.87           O
ATOM   3536  NE2 GLN A 434      15.354  12.893  67.728  1.00 88.87           N
ATOM   3537  C   GLN A 434      17.151  11.804  63.316  1.00 88.87           C
ATOM   3538  O   GLN A 434      18.263  12.316  63.199  1.00 88.87           O
ATOM   3539  N   ARG A 435      16.583  11.133  62.299  1.00102.74           N
ATOM   3540  CA  ARG A 435      17.255  11.000  61.033  1.00102.74           C
ATOM   3541  CB  ARG A 435      16.517  10.055  60.072  1.00102.74           C
ATOM   3542  CG  ARG A 435      16.371   8.622  60.592  1.00102.74           C
ATOM   3543  CD  ARG A 435      17.464   7.666  60.112  1.00102.74           C
ATOM   3544  NE  ARG A 435      16.956   6.284  60.332  1.00102.74           N
ATOM   3545  CZ  ARG A 435      17.243   5.309  59.422  1.00102.74           C
ATOM   3546  NH1 ARG A 435      18.092   5.574  58.387  1.00102.74           N
ATOM   3547  NH2 ARG A 435      16.668   4.079  59.536  1.00102.74           N
ATOM   3548  C   ARG A 435      17.369  12.334  60.348  1.00102.74           C
ATOM   3549  O   ARG A 435      18.412  12.657  59.781  1.00102.74           O
ATOM   3550  N   VAL A 436      16.287  13.139  60.371  1.00 41.86           N
ATOM   3551  CA  VAL A 436      16.261  14.421  59.712  1.00 41.86           C
ATOM   3552  CB  VAL A 436      14.912  15.079  59.783  1.00 41.86           C
ATOM   3553  CG1 VAL A 436      14.989  16.466  59.116  1.00 41.86           C
ATOM   3554  CG2 VAL A 436      13.890  14.132  59.132  1.00 41.86           C
ATOM   3555  C   VAL A 436      17.253  15.344  60.343  1.00 41.86           C
ATOM   3556  O   VAL A 436      17.979  16.052  59.644  1.00 41.86           O
ATOM   3557  N   ILE A 437      17.307  15.357  61.690  1.00 91.92           N
ATOM   3558  CA  ILE A 437      18.210  16.240  62.368  1.00 91.92           C
ATOM   3559  CB  ILE A 437      18.060  16.224  63.867  1.00 91.92           C
ATOM   3560  CG1 ILE A 437      19.065  17.194  64.510  1.00 91.92           C
ATOM   3561  CG2 ILE A 437      18.163  14.781  64.381  1.00 91.92           C
ATOM   3562  CD1 ILE A 437      18.907  17.320  66.023  1.00 91.92           C
ATOM   3563  C   ILE A 437      19.618  15.867  62.020  1.00 91.92           C
ATOM   3564  O   ILE A 437      20.427  16.725  61.670  1.00 91.92           O
ATOM   3565  N   ASP A 438      19.934  14.564  62.046  1.00 37.09           N
ATOM   3566  CA  ASP A 438      21.281  14.152  61.784  1.00 37.09           C
ATOM   3567  CB  ASP A 438      21.460  12.626  61.807  1.00 37.09           C
ATOM   3568  CG  ASP A 438      22.939  12.343  61.597  1.00 37.09           C
ATOM   3569  OD1 ASP A 438      23.749  13.295  61.749  1.00 37.09           O
ATOM   3570  OD2 ASP A 438      23.279  11.173  61.275  1.00 37.09           O
ATOM   3571  C   ASP A 438      21.656  14.614  60.411  1.00 37.09           C
ATOM   3572  O   ASP A 438      22.782  15.052  60.186  1.00 37.09           O
ATOM   3573  N   ALA A 439      20.726  14.491  59.446  1.00 48.13           N
ATOM   3574  CA  ALA A 439      20.991  14.879  58.088  1.00 48.13           C
ATOM   3575  CB  ALA A 439      19.863  14.476  57.124  1.00 48.13           C
ATOM   3576  C   ALA A 439      21.162  16.364  57.963  1.00 48.13           C
ATOM   3577  O   ALA A 439      22.075  16.817  57.278  1.00 48.13           O
ATOM   3578  N   LEU A 440      20.283  17.153  58.618  1.00 75.72           N
ATOM   3579  CA  LEU A 440      20.247  18.593  58.535  1.00 75.72           C
ATOM   3580  CB  LEU A 440      18.977  19.184  59.169  1.00 75.72           C
ATOM   3581  CG  LEU A 440      17.708  18.887  58.347  1.00 75.72           C
ATOM   3582  CD1 LEU A 440      16.445  19.383  59.062  1.00 75.72           C
ATOM   3583  CD2 LEU A 440      17.826  19.456  56.922  1.00 75.72           C
ATOM   3584  C   LEU A 440      21.443  19.213  59.191  1.00 75.72           C
ATOM   3585  O   LEU A 440      21.828  20.334  58.859  1.00 75.72           O
ATOM   3586  N   SER A 441      22.031  18.538  60.193  1.00 37.93           N
ATOM   3587  CA  SER A 441      23.186  19.097  60.832  1.00 37.93           C
ATOM   3588  CB  SER A 441      23.711  18.229  61.986  1.00 37.93           C
ATOM   3589  OG  SER A 441      22.756  18.190  63.035  1.00 37.93           O
ATOM   3590  C   SER A 441      24.275  19.223  59.808  1.00 37.93           C
ATOM   3591  O   SER A 441      25.156  20.072  59.937  1.00 37.93           O
ATOM   3592  N   ASP A 442      24.241  18.359  58.773  1.00 75.89           N
ATOM   3593  CA  ASP A 442      25.196  18.321  57.691  1.00 75.89           C
ATOM   3594  CB  ASP A 442      25.096  17.063  56.813  1.00 75.89           C
ATOM   3595  CG  ASP A 442      25.936  15.985  57.473  1.00 75.89           C
ATOM   3596  OD1 ASP A 442      26.839  16.361  58.267  1.00 75.89           O
ATOM   3597  OD2 ASP A 442      25.710  14.781  57.181  1.00 75.89           O
ATOM   3598  C   ASP A 442      25.112  19.514  56.776  1.00 75.89           C
ATOM   3599  O   ASP A 442      26.131  19.857  56.179  1.00 75.89           O
ATOM   3600  N   PRO A 443      23.982  20.136  56.567  1.00144.13           N
ATOM   3601  CA  PRO A 443      23.973  21.278  55.694  1.00144.13           C
ATOM   3602  CD  PRO A 443      22.753  19.386  56.399  1.00144.13           C
ATOM   3603  CB  PRO A 443      22.510  21.630  55.480  1.00144.13           C
ATOM   3604  CG  PRO A 443      21.820  20.264  55.541  1.00144.13           C
ATOM   3605  C   PRO A 443      24.771  22.433  56.195  1.00144.13           C
ATOM   3606  O   PRO A 443      24.703  22.746  57.382  1.00144.13           O
ATOM   3607  N   ARG A 444      25.582  23.023  55.298  1.00185.93           N
ATOM   3608  CA  ARG A 444      26.396  24.179  55.543  1.00185.93           C
ATOM   3609  CB  ARG A 444      27.577  24.301  54.569  1.00185.93           C
ATOM   3610  CG  ARG A 444      28.694  23.273  54.765  1.00185.93           C
ATOM   3611  CD  ARG A 444      28.313  21.834  54.421  1.00185.93           C
ATOM   3612  NE  ARG A 444      29.583  21.122  54.100  1.00185.93           N
ATOM   3613  CZ  ARG A 444      29.760  19.809  54.427  1.00185.93           C
ATOM   3614  NH1 ARG A 444      28.819  19.147  55.159  1.00185.93           N
ATOM   3615  NH2 ARG A 444      30.885  19.158  54.014  1.00185.93           N
ATOM   3616  C   ARG A 444      25.625  25.464  55.456  1.00185.93           C
ATOM   3617  O   ARG A 444      25.971  26.430  56.134  1.00185.93           O
ATOM   3618  N   VAL A 445      24.587  25.521  54.589  1.00 54.86           N
ATOM   3619  CA  VAL A 445      23.904  26.755  54.287  1.00 54.86           C
ATOM   3620  CB  VAL A 445      23.449  26.814  52.856  1.00 54.86           C
ATOM   3621  CG1 VAL A 445      22.585  28.071  52.660  1.00 54.86           C
ATOM   3622  CG2 VAL A 445      24.688  26.758  51.945  1.00 54.86           C
ATOM   3623  C   VAL A 445      22.685  26.911  55.144  1.00 54.86           C
ATOM   3624  O   VAL A 445      21.797  26.061  55.164  1.00 54.86           O
ATOM   3625  N   THR A 446      22.614  28.063  55.842  1.00102.62           N
ATOM   3626  CA  THR A 446      21.572  28.392  56.771  1.00102.62           C
ATOM   3627  CB  THR A 446      21.842  29.698  57.476  1.00102.62           C
ATOM   3628  OG1 THR A 446      20.891  29.909  58.507  1.00102.62           O
ATOM   3629  CG2 THR A 446      21.796  30.854  56.461  1.00102.62           C
ATOM   3630  C   THR A 446      20.243  28.498  56.084  1.00102.62           C
ATOM   3631  O   THR A 446      19.238  27.997  56.583  1.00102.62           O
ATOM   3632  N   HIS A 447      20.187  29.131  54.902  1.00 76.49           N
ATOM   3633  CA  HIS A 447      18.912  29.353  54.281  1.00 76.49           C
ATOM   3634  ND1 HIS A 447      17.344  32.088  52.956  1.00 76.49           N
ATOM   3635  CG  HIS A 447      17.708  30.811  52.589  1.00 76.49           C
ATOM   3636  CB  HIS A 447      19.011  30.179  52.988  1.00 76.49           C
ATOM   3637  NE2 HIS A 447      15.676  31.283  51.729  1.00 76.49           N
ATOM   3638  CD2 HIS A 447      16.676  30.333  51.840  1.00 76.49           C
ATOM   3639  CE1 HIS A 447      16.122  32.320  52.415  1.00 76.49           C
ATOM   3640  C   HIS A 447      18.287  28.032  53.941  1.00 76.49           C
ATOM   3641  O   HIS A 447      17.074  27.867  54.043  1.00 76.49           O
ATOM   3642  N   GLU A 448      19.093  27.051  53.500  1.00120.75           N
ATOM   3643  CA  GLU A 448      18.542  25.778  53.137  1.00120.75           C
ATOM   3644  CB  GLU A 448      19.575  24.874  52.440  1.00120.75           C
ATOM   3645  CG  GLU A 448      19.123  23.430  52.269  1.00120.75           C
ATOM   3646  CD  GLU A 448      19.589  22.742  53.535  1.00120.75           C
ATOM   3647  OE1 GLU A 448      20.638  23.194  54.065  1.00120.75           O
ATOM   3648  OE2 GLU A 448      18.921  21.780  53.995  1.00120.75           O
ATOM   3649  C   GLU A 448      17.940  25.096  54.341  1.00120.75           C
ATOM   3650  O   GLU A 448      16.858  24.520  54.229  1.00120.75           O
ATOM   3651  N   VAL A 449      18.602  25.138  55.524  1.00121.70           N
ATOM   3652  CA  VAL A 449      18.036  24.513  56.696  1.00121.70           C
ATOM   3653  CB  VAL A 449      18.930  24.464  57.919  1.00121.70           C
ATOM   3654  CG1 VAL A 449      20.065  23.460  57.683  1.00121.70           C
ATOM   3655  CG2 VAL A 449      19.431  25.867  58.279  1.00121.70           C
ATOM   3656  C   VAL A 449      16.752  25.196  57.072  1.00121.70           C
ATOM   3657  O   VAL A 449      15.753  24.544  57.360  1.00121.70           O
ATOM   3658  N   ARG A 450      16.711  26.534  57.054  1.00171.76           N
ATOM   3659  CA  ARG A 450      15.495  27.196  57.427  1.00171.76           C
ATOM   3660  CB  ARG A 450      15.637  28.731  57.446  1.00171.76           C
ATOM   3661  CG  ARG A 450      16.105  29.347  56.129  1.00171.76           C
ATOM   3662  CD  ARG A 450      16.500  30.817  56.263  1.00171.76           C
ATOM   3663  NE  ARG A 450      15.273  31.575  56.629  1.00171.76           N
ATOM   3664  CZ  ARG A 450      15.230  32.266  57.805  1.00171.76           C
ATOM   3665  NH1 ARG A 450      16.279  32.193  58.675  1.00171.76           N
ATOM   3666  NH2 ARG A 450      14.141  33.032  58.107  1.00171.76           N
ATOM   3667  C   ARG A 450      14.400  26.777  56.485  1.00171.76           C
ATOM   3668  O   ARG A 450      13.278  26.512  56.913  1.00171.76           O
ATOM   3669  N   ALA A 451      14.702  26.673  55.177  1.00 35.89           N
ATOM   3670  CA  ALA A 451      13.722  26.294  54.191  1.00 35.89           C
ATOM   3671  CB  ALA A 451      14.292  26.266  52.763  1.00 35.89           C
ATOM   3672  C   ALA A 451      13.229  24.908  54.473  1.00 35.89           C
ATOM   3673  O   ALA A 451      12.039  24.627  54.326  1.00 35.89           O
ATOM   3674  N   ILE A 452      14.135  23.994  54.869  1.00141.72           N
ATOM   3675  CA  ILE A 452      13.726  22.640  55.095  1.00141.72           C
ATOM   3676  CB  ILE A 452      14.892  21.702  55.313  1.00141.72           C
ATOM   3677  CG1 ILE A 452      14.471  20.243  55.140  1.00141.72           C
ATOM   3678  CG2 ILE A 452      15.453  21.918  56.722  1.00141.72           C
ATOM   3679  CD1 ILE A 452      13.656  19.760  56.327  1.00141.72           C
ATOM   3680  C   ILE A 452      12.762  22.602  56.248  1.00141.72           C
ATOM   3681  O   ILE A 452      11.743  21.916  56.170  1.00141.72           O
ATOM   3682  N   TRP A 453      13.036  23.377  57.326  1.00108.49           N
ATOM   3683  CA  TRP A 453      12.202  23.371  58.503  1.00108.49           C
ATOM   3684  CB  TRP A 453      12.414  24.515  59.514  1.00108.49           C
ATOM   3685  CG  TRP A 453      13.805  24.941  59.889  1.00108.49           C
ATOM   3686  CD2 TRP A 453      14.943  24.082  59.938  1.00108.49           C
ATOM   3687  CD1 TRP A 453      14.253  26.201  60.157  1.00108.49           C
ATOM   3688  NE1 TRP A 453      15.603  26.178  60.396  1.00108.49           N
ATOM   3689  CE2 TRP A 453      16.045  24.881  60.253  1.00108.49           C
ATOM   3690  CE3 TRP A 453      15.066  22.744  59.723  1.00108.49           C
ATOM   3691  CZ2 TRP A 453      17.292  24.348  60.368  1.00108.49           C
ATOM   3692  CZ3 TRP A 453      16.327  22.215  59.839  1.00108.49           C
ATOM   3693  CH2 TRP A 453      17.417  22.997  60.153  1.00108.49           C
ATOM   3694  C   TRP A 453      10.850  23.809  58.072  1.00108.49           C
ATOM   3695  O   TRP A 453       9.848  23.212  58.450  1.00108.49           O
ATOM   3696  N   VAL A 454      10.808  24.908  57.295  1.00 37.93           N
ATOM   3697  CA  VAL A 454       9.587  25.545  56.895  1.00 37.93           C
ATOM   3698  CB  VAL A 454       9.826  26.775  56.069  1.00 37.93           C
ATOM   3699  CG1 VAL A 454       8.469  27.345  55.624  1.00 37.93           C
ATOM   3700  CG2 VAL A 454      10.673  27.752  56.899  1.00 37.93           C
ATOM   3701  C   VAL A 454       8.760  24.601  56.083  1.00 37.93           C
ATOM   3702  O   VAL A 454       7.544  24.531  56.258  1.00 37.93           O
ATOM   3703  N   SER A 455       9.395  23.845  55.172  1.00 33.47           N
ATOM   3704  CA  SER A 455       8.635  22.956  54.344  1.00 33.47           C
ATOM   3705  CB  SER A 455       9.515  22.175  53.354  1.00 33.47           C
ATOM   3706  OG  SER A 455      10.135  23.076  52.448  1.00 33.47           O
ATOM   3707  C   SER A 455       7.941  21.973  55.234  1.00 33.47           C
ATOM   3708  O   SER A 455       6.748  21.719  55.081  1.00 33.47           O
ATOM   3709  N   TYR A 456       8.677  21.381  56.191  1.00131.23           N
ATOM   3710  CA  TYR A 456       8.054  20.440  57.079  1.00131.23           C
ATOM   3711  CB  TYR A 456       9.027  19.732  58.042  1.00131.23           C
ATOM   3712  CG  TYR A 456       9.730  18.615  57.356  1.00131.23           C
ATOM   3713  CD1 TYR A 456      10.886  18.820  56.647  1.00131.23           C
ATOM   3714  CD2 TYR A 456       9.215  17.343  57.433  1.00131.23           C
ATOM   3715  CE1 TYR A 456      11.519  17.767  56.029  1.00131.23           C
ATOM   3716  CE2 TYR A 456       9.843  16.286  56.818  1.00131.23           C
ATOM   3717  CZ  TYR A 456      11.000  16.500  56.114  1.00131.23           C
ATOM   3718  OH  TYR A 456      11.653  15.421  55.481  1.00131.23           O
ATOM   3719  C   TYR A 456       7.051  21.099  57.984  1.00131.23           C
ATOM   3720  O   TYR A 456       5.935  20.613  58.152  1.00131.23           O
ATOM   3721  N   TRP A 457       7.462  22.210  58.617  1.00176.57           N
ATOM   3722  CA  TRP A 457       6.743  22.813  59.705  1.00176.57           C
ATOM   3723  CB  TRP A 457       7.576  23.938  60.372  1.00176.57           C
ATOM   3724  CG  TRP A 457       6.938  24.590  61.581  1.00176.57           C
ATOM   3725  CD2 TRP A 457       6.797  26.001  61.845  1.00176.57           C
ATOM   3726  CD1 TRP A 457       6.441  23.957  62.671  1.00176.57           C
ATOM   3727  NE1 TRP A 457       5.975  24.864  63.589  1.00176.57           N
ATOM   3728  CE2 TRP A 457       6.194  26.129  63.097  1.00176.57           C
ATOM   3729  CE3 TRP A 457       7.149  27.100  61.115  1.00176.57           C
ATOM   3730  CZ2 TRP A 457       5.929  27.354  63.641  1.00176.57           C
ATOM   3731  CZ3 TRP A 457       6.871  28.336  61.663  1.00176.57           C
ATOM   3732  CH2 TRP A 457       6.272  28.463  62.900  1.00176.57           C
ATOM   3733  C   TRP A 457       5.430  23.411  59.410  1.00176.57           C
ATOM   3734  O   TRP A 457       4.382  22.778  59.566  1.00176.57           O
ATOM   3735  N   THR A 458       5.499  24.645  58.886  1.00 37.23           N
ATOM   3736  CA  THR A 458       4.314  25.416  58.762  1.00 37.23           C
ATOM   3737  CB  THR A 458       4.558  26.760  58.143  1.00 37.23           C
ATOM   3738  OG1 THR A 458       5.491  27.502  58.915  1.00 37.23           O
ATOM   3739  CG2 THR A 458       3.219  27.513  58.065  1.00 37.23           C
ATOM   3740  C   THR A 458       3.468  24.669  57.834  1.00 37.23           C
ATOM   3741  O   THR A 458       2.276  24.462  58.057  1.00 37.23           O
ATOM   3742  N   GLN A 459       4.101  24.227  56.750  1.00146.23           N
ATOM   3743  CA  GLN A 459       3.246  23.625  55.810  1.00146.23           C
ATOM   3744  CB  GLN A 459       3.920  23.547  54.446  1.00146.23           C
ATOM   3745  CG  GLN A 459       4.102  24.904  53.758  1.00146.23           C
ATOM   3746  CD  GLN A 459       2.791  25.268  53.074  1.00146.23           C
ATOM   3747  OE1 GLN A 459       1.711  25.124  53.646  1.00146.23           O
ATOM   3748  NE2 GLN A 459       2.886  25.742  51.803  1.00146.23           N
ATOM   3749  C   GLN A 459       2.753  22.251  56.170  1.00146.23           C
ATOM   3750  O   GLN A 459       1.552  22.062  56.345  1.00146.23           O
ATOM   3751  N   ALA A 460       3.662  21.260  56.317  1.00 62.23           N
ATOM   3752  CA  ALA A 460       3.212  19.894  56.461  1.00 62.23           C
ATOM   3753  CB  ALA A 460       4.351  18.873  56.296  1.00 62.23           C
ATOM   3754  C   ALA A 460       2.585  19.613  57.781  1.00 62.23           C
ATOM   3755  O   ALA A 460       1.446  19.156  57.861  1.00 62.23           O
ATOM   3756  N   ASP A 461       3.327  19.909  58.861  1.00113.10           N
ATOM   3757  CA  ASP A 461       2.869  19.603  60.180  1.00113.10           C
ATOM   3758  CB  ASP A 461       3.200  18.169  60.620  1.00113.10           C
ATOM   3759  CG  ASP A 461       2.390  17.887  61.873  1.00113.10           C
ATOM   3760  OD1 ASP A 461       1.139  17.807  61.749  1.00113.10           O
ATOM   3761  OD2 ASP A 461       3.003  17.753  62.965  1.00113.10           O
ATOM   3762  C   ASP A 461       3.593  20.528  61.104  1.00113.10           C
ATOM   3763  O   ASP A 461       4.822  20.568  61.126  1.00113.10           O
ATOM   3764  N   LYS A 462       2.831  21.304  61.890  1.00 98.81           N
ATOM   3765  CA  LYS A 462       3.366  22.293  62.784  1.00 98.81           C
ATOM   3766  CB  LYS A 462       2.249  23.133  63.433  1.00 98.81           C
ATOM   3767  CG  LYS A 462       2.730  24.407  64.132  1.00 98.81           C
ATOM   3768  CD  LYS A 462       1.584  25.348  64.520  1.00 98.81           C
ATOM   3769  CE  LYS A 462       2.040  26.684  65.114  1.00 98.81           C
ATOM   3770  NZ  LYS A 462       2.467  26.509  66.519  1.00 98.81           N
ATOM   3771  C   LYS A 462       4.174  21.652  63.884  1.00 98.81           C
ATOM   3772  O   LYS A 462       5.206  22.172  64.296  1.00 98.81           O
ATOM   3773  N   SER A 463       3.741  20.501  64.419  1.00101.15           N
ATOM   3774  CA  SER A 463       4.457  19.922  65.525  1.00101.15           C
ATOM   3775  CB  SER A 463       3.839  18.590  65.990  1.00101.15           C
ATOM   3776  OG  SER A 463       2.451  18.739  66.239  1.00101.15           O
ATOM   3777  C   SER A 463       5.843  19.557  65.095  1.00101.15           C
ATOM   3778  O   SER A 463       6.822  19.857  65.777  1.00101.15           O
ATOM   3779  N   LEU A 464       5.950  18.882  63.937  1.00 63.34           N
ATOM   3780  CA  LEU A 464       7.208  18.385  63.465  1.00 63.34           C
ATOM   3781  CB  LEU A 464       7.056  17.545  62.184  1.00 63.34           C
ATOM   3782  CG  LEU A 464       8.388  16.991  61.650  1.00 63.34           C
ATOM   3783  CD1 LEU A 464       9.029  16.010  62.644  1.00 63.34           C
ATOM   3784  CD2 LEU A 464       8.213  16.393  60.247  1.00 63.34           C
ATOM   3785  C   LEU A 464       8.135  19.525  63.183  1.00 63.34           C
ATOM   3786  O   LEU A 464       9.319  19.465  63.511  1.00 63.34           O
ATOM   3787  N   GLY A 465       7.618  20.607  62.576  1.00 36.82           N
ATOM   3788  CA  GLY A 465       8.443  21.732  62.254  1.00 36.82           C
ATOM   3789  C   GLY A 465       8.983  22.313  63.521  1.00 36.82           C
ATOM   3790  O   GLY A 465      10.104  22.816  63.547  1.00 36.82           O
ATOM   3791  N   MET A 466       8.166  22.303  64.589  1.00149.93           N
ATOM   3792  CA  MET A 466       8.535  22.849  65.865  1.00149.93           C
ATOM   3793  CB  MET A 466       7.351  22.774  66.855  1.00149.93           C
ATOM   3794  CG  MET A 466       7.546  23.527  68.174  1.00149.93           C
ATOM   3795  SD  MET A 466       8.784  22.801  69.289  1.00149.93           S
ATOM   3796  CE  MET A 466       8.525  24.006  70.624  1.00149.93           C
ATOM   3797  C   MET A 466       9.691  22.079  66.442  1.00149.93           C
ATOM   3798  O   MET A 466      10.655  22.676  66.920  1.00149.93           O
ATOM   3799  N   LYS A 467       9.632  20.731  66.403  1.00 70.57           N
ATOM   3800  CA  LYS A 467      10.665  19.900  66.963  1.00 70.57           C
ATOM   3801  CB  LYS A 467      10.292  18.409  66.991  1.00 70.57           C
ATOM   3802  CG  LYS A 467       9.263  18.090  68.081  1.00 70.57           C
ATOM   3803  CD  LYS A 467       8.554  16.747  67.909  1.00 70.57           C
ATOM   3804  CE  LYS A 467       7.301  16.846  67.037  1.00 70.57           C
ATOM   3805  NZ  LYS A 467       6.586  15.549  67.037  1.00 70.57           N
ATOM   3806  C   LYS A 467      11.935  20.059  66.190  1.00 70.57           C
ATOM   3807  O   LYS A 467      13.020  20.092  66.767  1.00 70.57           O
ATOM   3808  N   LEU A 468      11.826  20.167  64.855  1.00 78.82           N
ATOM   3809  CA  LEU A 468      12.960  20.335  63.990  1.00 78.82           C
ATOM   3810  CB  LEU A 468      12.521  20.611  62.528  1.00 78.82           C
ATOM   3811  CG  LEU A 468      11.793  19.489  61.751  1.00 78.82           C
ATOM   3812  CD1 LEU A 468      11.197  20.037  60.442  1.00 78.82           C
ATOM   3813  CD2 LEU A 468      12.720  18.305  61.448  1.00 78.82           C
ATOM   3814  C   LEU A 468      13.638  21.600  64.403  1.00 78.82           C
ATOM   3815  O   LEU A 468      14.857  21.652  64.545  1.00 78.82           O
ATOM   3816  N   ALA A 469      12.847  22.662  64.623  1.00 41.45           N
ATOM   3817  CA  ALA A 469      13.372  23.960  64.934  1.00 41.45           C
ATOM   3818  CB  ALA A 469      12.268  25.023  65.077  1.00 41.45           C
ATOM   3819  C   ALA A 469      14.126  23.912  66.221  1.00 41.45           C
ATOM   3820  O   ALA A 469      15.173  24.544  66.347  1.00 41.45           O
ATOM   3821  N   SER A 470      13.604  23.177  67.220  1.00 77.49           N
ATOM   3822  CA  SER A 470      14.229  23.110  68.511  1.00 77.49           C
ATOM   3823  CB  SER A 470      13.411  22.275  69.515  1.00 77.49           C
ATOM   3824  OG  SER A 470      14.084  22.213  70.765  1.00 77.49           O
ATOM   3825  C   SER A 470      15.576  22.464  68.422  1.00 77.49           C
ATOM   3826  O   SER A 470      16.569  23.016  68.893  1.00 77.49           O
ATOM   3827  N   ARG A 471      15.649  21.263  67.817  1.00190.48           N
ATOM   3828  CA  ARG A 471      16.884  20.529  67.816  1.00190.48           C
ATOM   3829  CB  ARG A 471      16.762  19.047  67.441  1.00190.48           C
ATOM   3830  CG  ARG A 471      16.344  18.776  66.006  1.00190.48           C
ATOM   3831  CD  ARG A 471      15.955  17.317  65.819  1.00190.48           C
ATOM   3832  NE  ARG A 471      14.473  17.294  65.888  1.00190.48           N
ATOM   3833  CZ  ARG A 471      13.781  17.425  64.723  1.00190.48           C
ATOM   3834  NH1 ARG A 471      14.480  17.521  63.556  1.00190.48           N
ATOM   3835  NH2 ARG A 471      12.416  17.448  64.725  1.00190.48           N
ATOM   3836  C   ARG A 471      17.928  21.137  66.928  1.00190.48           C
ATOM   3837  O   ARG A 471      19.120  20.978  67.182  1.00190.48           O
ATOM   3838  N   LEU A 472      17.522  21.769  65.812  1.00180.15           N
ATOM   3839  CA  LEU A 472      18.479  22.310  64.879  1.00180.15           C
ATOM   3840  CB  LEU A 472      17.977  22.590  63.449  1.00180.15           C
ATOM   3841  CG  LEU A 472      17.862  21.340  62.548  1.00180.15           C
ATOM   3842  CD1 LEU A 472      19.138  20.489  62.631  1.00180.15           C
ATOM   3843  CD2 LEU A 472      16.562  20.550  62.718  1.00180.15           C
ATOM   3844  C   LEU A 472      19.121  23.541  65.367  1.00180.15           C
ATOM   3845  O   LEU A 472      20.223  23.883  64.924  1.00180.15           O
ATOM   3846  N   ASN A 473      18.347  24.233  66.219  1.00157.78           N
ATOM   3847  CA  ASN A 473      18.551  25.465  66.893  1.00157.78           C
ATOM   3848  CB  ASN A 473      19.989  25.640  67.420  1.00157.78           C
ATOM   3849  CG  ASN A 473      20.331  24.475  68.342  1.00157.78           C
ATOM   3850  OD1 ASN A 473      21.196  23.660  68.024  1.00157.78           O
ATOM   3851  ND2 ASN A 473      19.645  24.382  69.511  1.00157.78           N
ATOM   3852  C   ASN A 473      18.290  26.562  65.915  1.00157.78           C
ATOM   3853  O   ASN A 473      19.097  27.479  65.774  1.00157.78           O
ATOM   3854  N   VAL A 474      17.131  26.526  65.225  1.00 63.18           N
ATOM   3855  CA  VAL A 474      16.898  27.593  64.296  1.00 63.18           C
ATOM   3856  CB  VAL A 474      17.037  27.180  62.863  1.00 63.18           C
ATOM   3857  CG1 VAL A 474      16.757  28.414  61.990  1.00 63.18           C
ATOM   3858  CG2 VAL A 474      18.431  26.558  62.659  1.00 63.18           C
ATOM   3859  C   VAL A 474      15.503  28.091  64.492  1.00 63.18           C
ATOM   3860  O   VAL A 474      14.546  27.319  64.448  1.00 63.18           O
ATOM   3861  N   ARG A 475      15.362  29.420  64.677  1.00168.64           N
ATOM   3862  CA  ARG A 475      14.091  30.035  64.930  1.00168.64           C
ATOM   3863  CB  ARG A 475      14.226  31.474  65.446  1.00168.64           C
ATOM   3864  CG  ARG A 475      14.976  32.379  64.462  1.00168.64           C
ATOM   3865  CD  ARG A 475      15.138  33.824  64.944  1.00168.64           C
ATOM   3866  NE  ARG A 475      15.739  33.755  66.305  1.00168.64           N
ATOM   3867  CZ  ARG A 475      15.746  34.850  67.119  1.00168.64           C
ATOM   3868  NH1 ARG A 475      15.262  36.049  66.677  1.00168.64           N
ATOM   3869  NH2 ARG A 475      16.238  34.739  68.388  1.00168.64           N
ATOM   3870  C   ARG A 475      13.341  30.117  63.644  1.00168.64           C
ATOM   3871  O   ARG A 475      13.805  30.677  62.652  1.00168.64           O
ATOM   3872  N   PRO A 476      12.163  29.569  63.684  1.00212.66           N
ATOM   3873  CA  PRO A 476      11.325  29.532  62.519  1.00212.66           C
ATOM   3874  CD  PRO A 476      11.948  28.416  64.544  1.00212.66           C
ATOM   3875  CB  PRO A 476      10.291  28.437  62.780  1.00212.66           C
ATOM   3876  CG  PRO A 476      10.993  27.495  63.774  1.00212.66           C
ATOM   3877  C   PRO A 476      10.720  30.859  62.305  1.00212.66           C
ATOM   3878  O   PRO A 476      10.805  31.699  63.194  1.00212.66           O
ATOM   3879  N   THR A 477      10.113  31.078  61.133  1.00267.34           N
ATOM   3880  CA  THR A 477       9.539  32.364  60.927  1.00267.34           C
ATOM   3881  CB  THR A 477       8.902  32.531  59.577  1.00267.34           C
ATOM   3882  OG1 THR A 477       7.849  31.594  59.401  1.00267.34           O
ATOM   3883  CG2 THR A 477       9.985  32.323  58.501  1.00267.34           C
ATOM   3884  C   THR A 477       8.508  32.552  61.972  1.00267.34           C
ATOM   3885  O   THR A 477       7.607  31.730  62.135  1.00267.34           O
ATOM   3886  N   MET A 478       8.665  33.661  62.718  1.00 87.95           N
ATOM   3887  CA  MET A 478       7.807  34.013  63.803  1.00 87.95           C
ATOM   3888  CB  MET A 478       8.007  35.469  64.258  1.00 87.95           C
ATOM   3889  CG  MET A 478       7.111  35.896  65.420  1.00 87.95           C
ATOM   3890  SD  MET A 478       7.432  37.587  66.014  1.00 87.95           S
ATOM   3891  CE  MET A 478       8.809  37.122  67.104  1.00 87.95           C
ATOM   3892  C   MET A 478       6.366  33.847  63.339  1.00 87.95           C
ATOM   3893  O   MET A 478       5.712  32.874  63.802  1.00 87.95           O
ATOM   3894  OXT MET A 478       5.906  34.678  62.511  1.00 87.95           O
TER    3895      MET A 478
ATOM   3896  N   THR B   1      23.791  33.763  33.981  1.00 26.01           N
ATOM   3897  CA  THR B   1      23.957  32.919  32.774  1.00 26.01           C
ATOM   3898  CB  THR B   1      24.962  31.833  33.012  1.00 26.01           C
ATOM   3899  OG1 THR B   1      26.222  32.381  33.365  1.00 26.01           O
ATOM   3900  CG2 THR B   1      25.079  31.006  31.719  1.00 26.01           C
ATOM   3901  C   THR B   1      22.686  32.247  32.389  1.00 26.01           C
ATOM   3902  O   THR B   1      21.870  31.897  33.239  1.00 26.01           O
ATOM   3903  N   TYR B   2      22.508  32.033  31.072  1.00104.37           N
ATOM   3904  CA  TYR B   2      21.305  31.441  30.570  1.00104.37           C
ATOM   3905  CB  TYR B   2      20.862  32.009  29.213  1.00104.37           C
ATOM   3906  CG  TYR B   2      20.400  33.404  29.450  1.00104.37           C
ATOM   3907  CD1 TYR B   2      21.288  34.456  29.482  1.00104.37           C
ATOM   3908  CD2 TYR B   2      19.062  33.653  29.641  1.00104.37           C
ATOM   3909  CE1 TYR B   2      20.841  35.738  29.703  1.00104.37           C
ATOM   3910  CE2 TYR B   2      18.608  34.930  29.861  1.00104.37           C
ATOM   3911  CZ  TYR B   2      19.499  35.974  29.892  1.00104.37           C
ATOM   3912  OH  TYR B   2      19.035  37.287  30.119  1.00104.37           O
ATOM   3913  C   TYR B   2      21.488  29.970  30.391  1.00104.37           C
ATOM   3914  O   TYR B   2      22.469  29.507  29.811  1.00104.37           O
ATOM   3915  N   PHE B   3      20.519  29.205  30.927  1.00119.70           N
ATOM   3916  CA  PHE B   3      20.438  27.780  30.799  1.00119.70           C
ATOM   3917  CB  PHE B   3      19.255  27.217  31.609  1.00119.70           C
ATOM   3918  CG  PHE B   3      19.210  25.726  31.571  1.00119.70           C
ATOM   3919  CD1 PHE B   3      18.894  25.053  30.415  1.00119.70           C
ATOM   3920  CD2 PHE B   3      19.501  24.995  32.700  1.00119.70           C
ATOM   3921  CE1 PHE B   3      18.846  23.680  30.384  1.00119.70           C
ATOM   3922  CE2 PHE B   3      19.453  23.621  32.679  1.00119.70           C
ATOM   3923  CZ  PHE B   3      19.123  22.960  31.520  1.00119.70           C
ATOM   3924  C   PHE B   3      20.115  27.520  29.359  1.00119.70           C
ATOM   3925  O   PHE B   3      19.221  28.158  28.802  1.00119.70           O
ATOM   3926  N   THR B   4      20.834  26.573  28.718  1.00 45.51           N
ATOM   3927  CA  THR B   4      20.567  26.310  27.330  1.00 45.51           C
ATOM   3928  CB  THR B   4      21.580  26.909  26.400  1.00 45.51           C
ATOM   3929  OG1 THR B   4      22.852  26.313  26.611  1.00 45.51           O
ATOM   3930  CG2 THR B   4      21.652  28.421  26.671  1.00 45.51           C
ATOM   3931  C   THR B   4      20.616  24.834  27.091  1.00 45.51           C
ATOM   3932  O   THR B   4      21.066  24.063  27.937  1.00 45.51           O
ATOM   3933  N   THR B   5      20.120  24.409  25.911  1.00 54.23           N
ATOM   3934  CA  THR B   5      20.208  23.039  25.519  1.00 54.23           C
ATOM   3935  CB  THR B   5      19.202  22.636  24.479  1.00 54.23           C
ATOM   3936  OG1 THR B   5      19.407  23.369  23.280  1.00 54.23           O
ATOM   3937  CG2 THR B   5      17.794  22.915  25.036  1.00 54.23           C
ATOM   3938  C   THR B   5      21.580  22.890  24.929  1.00 54.23           C
ATOM   3939  O   THR B   5      22.355  23.844  24.911  1.00 54.23           O
ATOM   3940  N   ASN B   6      21.927  21.677  24.461  1.00 84.81           N
ATOM   3941  CA  ASN B   6      23.218  21.414  23.890  1.00 84.81           C
ATOM   3942  CB  ASN B   6      23.465  19.920  23.650  1.00 84.81           C
ATOM   3943  CG  ASN B   6      23.549  19.237  25.011  1.00 84.81           C
ATOM   3944  OD1 ASN B   6      23.544  18.011  25.101  1.00 84.81           O
ATOM   3945  ND2 ASN B   6      23.616  20.048  26.103  1.00 84.81           N
ATOM   3946  C   ASN B   6      23.332  22.162  22.593  1.00 84.81           C
ATOM   3947  O   ASN B   6      24.429  22.337  22.061  1.00 84.81           O
ATOM   3948  N   SER B   7      22.168  22.521  22.014  1.00 98.70           N
ATOM   3949  CA  SER B   7      22.013  23.281  20.799  1.00 98.70           C
ATOM   3950  CB  SER B   7      20.581  23.182  20.241  1.00 98.70           C
ATOM   3951  OG  SER B   7      20.461  23.940  19.046  1.00 98.70           O
ATOM   3952  C   SER B   7      22.314  24.748  21.006  1.00 98.70           C
ATOM   3953  O   SER B   7      22.458  25.491  20.036  1.00 98.70           O
ATOM   3954  N   GLY B   8      22.386  25.229  22.264  1.00 37.46           N
ATOM   3955  CA  GLY B   8      22.682  26.624  22.474  1.00 37.46           C
ATOM   3956  C   GLY B   8      21.417  27.433  22.532  1.00 37.46           C
ATOM   3957  O   GLY B   8      21.469  28.664  22.512  1.00 37.46           O
ATOM   3958  N   ALA B   9      20.240  26.774  22.572  1.00 58.46           N
ATOM   3959  CA  ALA B   9      19.000  27.503  22.650  1.00 58.46           C
ATOM   3960  CB  ALA B   9      17.819  26.742  22.028  1.00 58.46           C
ATOM   3961  C   ALA B   9      18.661  27.751  24.093  1.00 58.46           C
ATOM   3962  O   ALA B   9      18.768  26.852  24.924  1.00 58.46           O
ATOM   3963  N   PRO B  10      18.211  28.935  24.422  1.00156.56           N
ATOM   3964  CA  PRO B  10      17.856  29.229  25.786  1.00156.56           C
ATOM   3965  CD  PRO B  10      18.594  30.133  23.698  1.00156.56           C
ATOM   3966  CB  PRO B  10      17.738  30.754  25.881  1.00156.56           C
ATOM   3967  CG  PRO B  10      17.823  31.247  24.421  1.00156.56           C
ATOM   3968  C   PRO B  10      16.632  28.487  26.223  1.00156.56           C
ATOM   3969  O   PRO B  10      15.677  28.401  25.448  1.00156.56           O
ATOM   3970  N   VAL B  11      16.636  27.948  27.464  1.00132.81           N
ATOM   3971  CA  VAL B  11      15.472  27.254  27.938  1.00132.81           C
ATOM   3972  CB  VAL B  11      15.748  26.005  28.727  1.00132.81           C
ATOM   3973  CG1 VAL B  11      16.634  25.069  27.887  1.00132.81           C
ATOM   3974  CG2 VAL B  11      16.297  26.387  30.108  1.00132.81           C
ATOM   3975  C   VAL B  11      14.709  28.170  28.854  1.00132.81           C
ATOM   3976  O   VAL B  11      15.287  28.890  29.665  1.00132.81           O
ATOM   3977  N   TYR B  12      13.386  28.267  28.631  1.00229.65           N
ATOM   3978  CA  TYR B  12      12.462  28.986  29.477  1.00229.65           C
ATOM   3979  CB  TYR B  12      11.141  29.243  28.826  1.00229.65           C
ATOM   3980  CG  TYR B  12      10.000  29.196  29.815  1.00229.65           C
ATOM   3981  CD1 TYR B  12       9.766  30.210  30.700  1.00229.65           C
ATOM   3982  CD2 TYR B  12       9.120  28.134  29.860  1.00229.65           C
ATOM   3983  CE1 TYR B  12       8.729  30.218  31.601  1.00229.65           C
ATOM   3984  CE2 TYR B  12       8.064  28.122  30.751  1.00229.65           C
ATOM   3985  CZ  TYR B  12       7.865  29.158  31.626  1.00229.65           C
ATOM   3986  OH  TYR B  12       6.787  29.135  32.537  1.00229.65           O
ATOM   3987  C   TYR B  12      12.028  28.253  30.693  1.00229.65           C
ATOM   3988  O   TYR B  12      11.952  28.847  31.766  1.00229.65           O
ATOM   3989  N   ASN B  13      11.612  26.975  30.528  1.00154.56           N
ATOM   3990  CA  ASN B  13      11.175  26.271  31.696  1.00154.56           C
ATOM   3991  CB  ASN B  13       9.674  25.967  31.851  1.00154.56           C
ATOM   3992  CG  ASN B  13       9.163  25.029  30.772  1.00154.56           C
ATOM   3993  OD1 ASN B  13       8.371  24.129  31.048  1.00154.56           O
ATOM   3994  ND2 ASN B  13       9.621  25.243  29.509  1.00154.56           N
ATOM   3995  C   ASN B  13      11.874  24.960  31.764  1.00154.56           C
ATOM   3996  O   ASN B  13      11.724  24.104  30.891  1.00154.56           O
ATOM   3997  N   ASN B  14      12.666  24.769  32.834  1.00180.25           N
ATOM   3998  CA  ASN B  14      13.332  23.514  32.966  1.00180.25           C
ATOM   3999  CB  ASN B  14      14.830  23.615  33.343  1.00180.25           C
ATOM   4000  CG  ASN B  14      14.966  24.078  34.785  1.00180.25           C
ATOM   4001  OD1 ASN B  14      14.179  24.894  35.255  1.00180.25           O
ATOM   4002  ND2 ASN B  14      15.957  23.511  35.525  1.00180.25           N
ATOM   4003  C   ASN B  14      12.635  22.763  34.062  1.00180.25           C
ATOM   4004  O   ASN B  14      13.246  21.959  34.765  1.00180.25           O
ATOM   4005  N   ASN B  15      11.308  22.964  34.193  1.00116.58           N
ATOM   4006  CA  ASN B  15      10.582  22.332  35.254  1.00116.58           C
ATOM   4007  CB  ASN B  15       9.920  23.338  36.209  1.00116.58           C
ATOM   4008  CG  ASN B  15      11.002  23.972  37.072  1.00116.58           C
ATOM   4009  OD1 ASN B  15      11.978  23.321  37.441  1.00116.58           O
ATOM   4010  ND2 ASN B  15      10.825  25.278  37.408  1.00116.58           N
ATOM   4011  C   ASN B  15       9.465  21.503  34.692  1.00116.58           C
ATOM   4012  O   ASN B  15       9.051  20.535  35.329  1.00116.58           O
ATOM   4013  N   SER B  16       8.950  21.834  33.487  1.00 56.98           N
ATOM   4014  CA  SER B  16       7.796  21.109  33.022  1.00 56.98           C
ATOM   4015  CB  SER B  16       6.532  21.983  32.926  1.00 56.98           C
ATOM   4016  OG  SER B  16       6.169  22.471  34.209  1.00 56.98           O
ATOM   4017  C   SER B  16       8.015  20.545  31.652  1.00 56.98           C
ATOM   4018  O   SER B  16       8.538  21.208  30.757  1.00 56.98           O
ATOM   4019  N   SER B  17       7.587  19.279  31.462  1.00 44.91           N
ATOM   4020  CA  SER B  17       7.655  18.647  30.175  1.00 44.91           C
ATOM   4021  CB  SER B  17       7.530  17.115  30.236  1.00 44.91           C
ATOM   4022  OG  SER B  17       8.624  16.562  30.954  1.00 44.91           O
ATOM   4023  C   SER B  17       6.522  19.170  29.344  1.00 44.91           C
ATOM   4024  O   SER B  17       5.533  19.694  29.856  1.00 44.91           O
ATOM   4025  N   LEU B  18       6.664  19.043  28.012  1.00115.99           N
ATOM   4026  CA  LEU B  18       5.671  19.464  27.069  1.00115.99           C
ATOM   4027  CB  LEU B  18       6.341  19.702  25.705  1.00115.99           C
ATOM   4028  CG  LEU B  18       5.439  20.164  24.555  1.00115.99           C
ATOM   4029  CD1 LEU B  18       4.827  21.541  24.847  1.00115.99           C
ATOM   4030  CD2 LEU B  18       6.213  20.137  23.224  1.00115.99           C
ATOM   4031  C   LEU B  18       4.717  18.310  26.962  1.00115.99           C
ATOM   4032  O   LEU B  18       5.096  17.215  26.550  1.00115.99           O
ATOM   4033  N   THR B  19       3.440  18.522  27.335  1.00 71.87           N
ATOM   4034  CA  THR B  19       2.513  17.426  27.363  1.00 71.87           C
ATOM   4035  CB  THR B  19       2.136  17.031  28.766  1.00 71.87           C
ATOM   4036  OG1 THR B  19       1.618  18.152  29.466  1.00 71.87           O
ATOM   4037  CG2 THR B  19       3.379  16.490  29.492  1.00 71.87           C
ATOM   4038  C   THR B  19       1.273  17.787  26.604  1.00 71.87           C
ATOM   4039  O   THR B  19       0.965  18.959  26.396  1.00 71.87           O
ATOM   4040  N   VAL B  20       0.535  16.753  26.145  1.00146.15           N
ATOM   4041  CA  VAL B  20      -0.678  16.994  25.422  1.00146.15           C
ATOM   4042  CB  VAL B  20      -1.117  15.848  24.555  1.00146.15           C
ATOM   4043  CG1 VAL B  20      -0.129  15.751  23.387  1.00146.15           C
ATOM   4044  CG2 VAL B  20      -1.184  14.556  25.391  1.00146.15           C
ATOM   4045  C   VAL B  20      -1.752  17.292  26.422  1.00146.15           C
ATOM   4046  O   VAL B  20      -2.643  16.482  26.684  1.00146.15           O
ATOM   4047  N   GLY B  21      -1.711  18.533  26.951  1.00 59.14           N
ATOM   4048  CA  GLY B  21      -2.636  19.007  27.946  1.00 59.14           C
ATOM   4049  C   GLY B  21      -1.938  19.017  29.270  1.00 59.14           C
ATOM   4050  O   GLY B  21      -0.948  18.321  29.473  1.00 59.14           O
ATOM   4051  N   THR B  22      -2.465  19.800  30.231  1.00135.36           N
ATOM   4052  CA  THR B  22      -1.803  19.930  31.493  1.00135.36           C
ATOM   4053  CB  THR B  22      -2.463  20.912  32.423  1.00135.36           C
ATOM   4054  OG1 THR B  22      -1.628  21.150  33.545  1.00135.36           O
ATOM   4055  CG2 THR B  22      -3.828  20.368  32.874  1.00135.36           C
ATOM   4056  C   THR B  22      -1.731  18.588  32.165  1.00135.36           C
ATOM   4057  O   THR B  22      -0.745  18.259  32.821  1.00135.36           O
ATOM   4058  N   ARG B  23      -2.839  17.833  32.115  1.00176.00           N
ATOM   4059  CA  ARG B  23      -3.019  16.508  32.637  1.00176.00           C
ATOM   4060  CB  ARG B  23      -4.427  16.316  33.228  1.00176.00           C
ATOM   4061  CG  ARG B  23      -4.638  17.304  34.383  1.00176.00           C
ATOM   4062  CD  ARG B  23      -5.977  17.195  35.111  1.00176.00           C
ATOM   4063  NE  ARG B  23      -5.756  16.413  36.358  1.00176.00           N
ATOM   4064  CZ  ARG B  23      -6.026  15.076  36.392  1.00176.00           C
ATOM   4065  NH1 ARG B  23      -6.526  14.446  35.289  1.00176.00           N
ATOM   4066  NH2 ARG B  23      -5.801  14.368  37.537  1.00176.00           N
ATOM   4067  C   ARG B  23      -2.661  15.396  31.668  1.00176.00           C
ATOM   4068  O   ARG B  23      -2.750  14.227  32.036  1.00176.00           O
ATOM   4069  N   GLY B  24      -2.383  15.695  30.379  1.00 63.99           N
ATOM   4070  CA  GLY B  24      -2.210  14.668  29.366  1.00 63.99           C
ATOM   4071  C   GLY B  24      -0.795  14.163  29.209  1.00 63.99           C
ATOM   4072  O   GLY B  24       0.122  14.583  29.907  1.00 63.99           O
ATOM   4073  N   PRO B  25      -0.610  13.257  28.257  1.00107.12           N
ATOM   4074  CA  PRO B  25       0.657  12.596  28.019  1.00107.12           C
ATOM   4075  CD  PRO B  25      -1.724  12.514  27.694  1.00107.12           C
ATOM   4076  CB  PRO B  25       0.331  11.324  27.235  1.00107.12           C
ATOM   4077  CG  PRO B  25      -1.076  11.574  26.665  1.00107.12           C
ATOM   4078  C   PRO B  25       1.711  13.435  27.353  1.00107.12           C
ATOM   4079  O   PRO B  25       1.369  14.347  26.607  1.00107.12           O
ATOM   4080  N   ILE B  26       2.998  13.093  27.577  1.00127.49           N
ATOM   4081  CA  ILE B  26       4.159  13.812  27.116  1.00127.49           C
ATOM   4082  CB  ILE B  26       5.440  13.292  27.689  1.00127.49           C
ATOM   4083  CG1 ILE B  26       6.615  14.142  27.181  1.00127.49           C
ATOM   4084  CG2 ILE B  26       5.548  11.801  27.326  1.00127.49           C
ATOM   4085  CD1 ILE B  26       7.949  13.793  27.831  1.00127.49           C
ATOM   4086  C   ILE B  26       4.304  13.700  25.631  1.00127.49           C
ATOM   4087  O   ILE B  26       3.930  12.694  25.032  1.00127.49           O
ATOM   4088  N   LEU B  27       4.861  14.761  24.999  1.00 82.77           N
ATOM   4089  CA  LEU B  27       5.023  14.764  23.572  1.00 82.77           C
ATOM   4090  CB  LEU B  27       4.596  16.076  22.896  1.00 82.77           C
ATOM   4091  CG  LEU B  27       3.064  16.218  22.847  1.00 82.77           C
ATOM   4092  CD1 LEU B  27       2.629  17.528  22.170  1.00 82.77           C
ATOM   4093  CD2 LEU B  27       2.439  14.978  22.182  1.00 82.77           C
ATOM   4094  C   LEU B  27       6.431  14.435  23.172  1.00 82.77           C
ATOM   4095  O   LEU B  27       7.412  14.841  23.793  1.00 82.77           O
ATOM   4096  N   LEU B  28       6.544  13.680  22.063  1.00 81.72           N
ATOM   4097  CA  LEU B  28       7.796  13.240  21.518  1.00 81.72           C
ATOM   4098  CB  LEU B  28       7.676  12.378  20.253  1.00 81.72           C
ATOM   4099  CG  LEU B  28       9.047  11.834  19.808  1.00 81.72           C
ATOM   4100  CD1 LEU B  28       9.538  10.743  20.772  1.00 81.72           C
ATOM   4101  CD2 LEU B  28       9.062  11.409  18.333  1.00 81.72           C
ATOM   4102  C   LEU B  28       8.587  14.448  21.104  1.00 81.72           C
ATOM   4103  O   LEU B  28       9.815  14.412  21.033  1.00 81.72           O
ATOM   4104  N   GLU B  29       7.882  15.538  20.761  1.00100.61           N
ATOM   4105  CA  GLU B  29       8.459  16.764  20.280  1.00100.61           C
ATOM   4106  CB  GLU B  29       7.453  17.715  19.612  1.00100.61           C
ATOM   4107  CG  GLU B  29       6.285  18.176  20.478  1.00100.61           C
ATOM   4108  CD  GLU B  29       5.406  19.031  19.579  1.00100.61           C
ATOM   4109  OE1 GLU B  29       5.900  19.449  18.499  1.00100.61           O
ATOM   4110  OE2 GLU B  29       4.225  19.267  19.949  1.00100.61           O
ATOM   4111  C   GLU B  29       9.223  17.502  21.342  1.00100.61           C
ATOM   4112  O   GLU B  29       9.878  18.497  21.039  1.00100.61           O
ATOM   4113  N   ASP B  30       9.082  17.125  22.626  1.00 89.49           N
ATOM   4114  CA  ASP B  30       9.808  17.808  23.665  1.00 89.49           C
ATOM   4115  CB  ASP B  30       9.372  17.323  25.060  1.00 89.49           C
ATOM   4116  CG  ASP B  30       9.989  18.216  26.123  1.00 89.49           C
ATOM   4117  OD1 ASP B  30      10.909  19.004  25.782  1.00 89.49           O
ATOM   4118  OD2 ASP B  30       9.542  18.121  27.298  1.00 89.49           O
ATOM   4119  C   ASP B  30      11.281  17.526  23.496  1.00 89.49           C
ATOM   4120  O   ASP B  30      11.850  16.655  24.154  1.00 89.49           O
ATOM   4121  N   TYR B  31      11.946  18.318  22.629  1.00140.07           N
ATOM   4122  CA  TYR B  31      13.333  18.149  22.296  1.00140.07           C
ATOM   4123  CB  TYR B  31      13.810  19.151  21.235  1.00140.07           C
ATOM   4124  CG  TYR B  31      15.226  18.814  20.927  1.00140.07           C
ATOM   4125  CD1 TYR B  31      16.254  19.381  21.645  1.00140.07           C
ATOM   4126  CD2 TYR B  31      15.525  17.924  19.922  1.00140.07           C
ATOM   4127  CE1 TYR B  31      17.562  19.068  21.360  1.00140.07           C
ATOM   4128  CE2 TYR B  31      16.831  17.607  19.630  1.00140.07           C
ATOM   4129  CZ  TYR B  31      17.851  18.181  20.350  1.00140.07           C
ATOM   4130  OH  TYR B  31      19.193  17.860  20.056  1.00140.07           O
ATOM   4131  C   TYR B  31      14.164  18.380  23.521  1.00140.07           C
ATOM   4132  O   TYR B  31      15.141  17.671  23.764  1.00140.07           O
ATOM   4133  N   HIS B  32      13.793  19.393  24.327  1.00 91.28           N
ATOM   4134  CA  HIS B  32      14.554  19.754  25.491  1.00 91.28           C
ATOM   4135  ND1 HIS B  32      15.805  22.101  27.564  1.00 91.28           N
ATOM   4136  CG  HIS B  32      14.733  21.239  27.517  1.00 91.28           C
ATOM   4137  CB  HIS B  32      13.944  20.928  26.279  1.00 91.28           C
ATOM   4138  NE2 HIS B  32      15.559  21.279  29.616  1.00 91.28           N
ATOM   4139  CD2 HIS B  32      14.595  20.747  28.779  1.00 91.28           C
ATOM   4140  CE1 HIS B  32      16.261  22.087  28.843  1.00 91.28           C
ATOM   4141  C   HIS B  32      14.626  18.607  26.453  1.00 91.28           C
ATOM   4142  O   HIS B  32      15.699  18.292  26.967  1.00 91.28           O
ATOM   4143  N   LEU B  33      13.480  17.960  26.734  1.00 56.60           N
ATOM   4144  CA  LEU B  33      13.443  16.885  27.689  1.00 56.60           C
ATOM   4145  CB  LEU B  33      12.019  16.375  27.963  1.00 56.60           C
ATOM   4146  CG  LEU B  33      11.958  15.209  28.970  1.00 56.60           C
ATOM   4147  CD1 LEU B  33      12.388  15.638  30.382  1.00 56.60           C
ATOM   4148  CD2 LEU B  33      10.579  14.534  28.936  1.00 56.60           C
ATOM   4149  C   LEU B  33      14.246  15.713  27.209  1.00 56.60           C
ATOM   4150  O   LEU B  33      15.035  15.150  27.967  1.00 56.60           O
ATOM   4151  N   VAL B  34      14.071  15.317  25.930  1.00 40.63           N
ATOM   4152  CA  VAL B  34      14.720  14.138  25.422  1.00 40.63           C
ATOM   4153  CB  VAL B  34      14.268  13.721  24.054  1.00 40.63           C
ATOM   4154  CG1 VAL B  34      15.133  12.525  23.618  1.00 40.63           C
ATOM   4155  CG2 VAL B  34      12.764  13.395  24.109  1.00 40.63           C
ATOM   4156  C   VAL B  34      16.202  14.322  25.377  1.00 40.63           C
ATOM   4157  O   VAL B  34      16.948  13.397  25.693  1.00 40.63           O
ATOM   4158  N   GLU B  35      16.689  15.508  24.969  1.00 62.55           N
ATOM   4159  CA  GLU B  35      18.113  15.670  24.921  1.00 62.55           C
ATOM   4160  CB  GLU B  35      18.560  17.051  24.423  1.00 62.55           C
ATOM   4161  CG  GLU B  35      20.077  17.151  24.265  1.00 62.55           C
ATOM   4162  CD  GLU B  35      20.414  18.586  23.892  1.00 62.55           C
ATOM   4163  OE1 GLU B  35      20.624  19.404  24.829  1.00 62.55           O
ATOM   4164  OE2 GLU B  35      20.459  18.889  22.671  1.00 62.55           O
ATOM   4165  C   GLU B  35      18.643  15.497  26.313  1.00 62.55           C
ATOM   4166  O   GLU B  35      19.682  14.870  26.512  1.00 62.55           O
ATOM   4167  N   LYS B  36      17.931  16.058  27.311  1.00 77.48           N
ATOM   4168  CA  LYS B  36      18.326  16.022  28.695  1.00 77.48           C
ATOM   4169  CB  LYS B  36      17.325  16.826  29.560  1.00 77.48           C
ATOM   4170  CG  LYS B  36      17.742  17.140  31.003  1.00 77.48           C
ATOM   4171  CD  LYS B  36      16.843  18.199  31.670  1.00 77.48           C
ATOM   4172  CE  LYS B  36      17.221  18.546  33.115  1.00 77.48           C
ATOM   4173  NZ  LYS B  36      16.498  19.758  33.564  1.00 77.48           N
ATOM   4174  C   LYS B  36      18.359  14.608  29.224  1.00 77.48           C
ATOM   4175  O   LYS B  36      19.375  14.162  29.755  1.00 77.48           O
ATOM   4176  N   LEU B  37      17.247  13.855  29.075  1.00131.44           N
ATOM   4177  CA  LEU B  37      17.149  12.512  29.594  1.00131.44           C
ATOM   4178  CB  LEU B  37      15.745  11.899  29.413  1.00131.44           C
ATOM   4179  CG  LEU B  37      15.617  10.461  29.958  1.00131.44           C
ATOM   4180  CD1 LEU B  37      15.808  10.416  31.482  1.00131.44           C
ATOM   4181  CD2 LEU B  37      14.305   9.802  29.500  1.00131.44           C
ATOM   4182  C   LEU B  37      18.104  11.620  28.867  1.00131.44           C
ATOM   4183  O   LEU B  37      18.750  10.764  29.468  1.00131.44           O
ATOM   4184  N   ALA B  38      18.207  11.805  27.539  1.00 49.76           N
ATOM   4185  CA  ALA B  38      19.009  10.966  26.694  1.00 49.76           C
ATOM   4186  CB  ALA B  38      18.879  11.316  25.201  1.00 49.76           C
ATOM   4187  C   ALA B  38      20.464  11.074  27.049  1.00 49.76           C
ATOM   4188  O   ALA B  38      21.214  10.114  26.891  1.00 49.76           O
ATOM   4189  N   ASN B  39      20.927  12.276  27.437  1.00 48.05           N
ATOM   4190  CA  ASN B  39      22.302  12.476  27.812  1.00 48.05           C
ATOM   4191  CB  ASN B  39      22.638  13.975  27.935  1.00 48.05           C
ATOM   4192  CG  ASN B  39      24.144  14.169  27.848  1.00 48.05           C
ATOM   4193  OD1 ASN B  39      24.913  13.534  28.567  1.00 48.05           O
ATOM   4194  ND2 ASN B  39      24.579  15.076  26.930  1.00 48.05           N
ATOM   4195  C   ASN B  39      22.555  11.825  29.139  1.00 48.05           C
ATOM   4196  O   ASN B  39      23.600  11.219  29.373  1.00 48.05           O
ATOM   4197  N   PHE B  40      21.571  11.948  30.046  1.00 73.60           N
ATOM   4198  CA  PHE B  40      21.602  11.404  31.373  1.00 73.60           C
ATOM   4199  CB  PHE B  40      20.329  11.770  32.153  1.00 73.60           C
ATOM   4200  CG  PHE B  40      20.301  11.000  33.425  1.00 73.60           C
ATOM   4201  CD1 PHE B  40      21.106  11.349  34.482  1.00 73.60           C
ATOM   4202  CD2 PHE B  40      19.440   9.935  33.563  1.00 73.60           C
ATOM   4203  CE1 PHE B  40      21.065  10.633  35.655  1.00 73.60           C
ATOM   4204  CE2 PHE B  40      19.394   9.216  34.734  1.00 73.60           C
ATOM   4205  CZ  PHE B  40      20.211   9.565  35.783  1.00 73.60           C
ATOM   4206  C   PHE B  40      21.687   9.916  31.272  1.00 73.60           C
ATOM   4207  O   PHE B  40      22.371   9.269  32.062  1.00 73.60           O
ATOM   4208  N   ASP B  41      20.977   9.338  30.288  1.00 96.69           N
ATOM   4209  CA  ASP B  41      20.917   7.919  30.082  1.00 96.69           C
ATOM   4210  CB  ASP B  41      19.953   7.538  28.939  1.00 96.69           C
ATOM   4211  CG  ASP B  41      18.522   7.723  29.434  1.00 96.69           C
ATOM   4212  OD1 ASP B  41      18.302   7.543  30.661  1.00 96.69           O
ATOM   4213  OD2 ASP B  41      17.632   8.035  28.596  1.00 96.69           O
ATOM   4214  C   ASP B  41      22.281   7.375  29.738  1.00 96.69           C
ATOM   4215  O   ASP B  41      22.545   6.193  29.941  1.00 96.69           O
ATOM   4216  N   ARG B  42      23.105   8.196  29.063  1.00180.82           N
ATOM   4217  CA  ARG B  42      24.439   7.952  28.570  1.00180.82           C
ATOM   4218  CB  ARG B  42      24.676   8.564  27.183  1.00180.82           C
ATOM   4219  CG  ARG B  42      23.982   7.728  26.105  1.00180.82           C
ATOM   4220  CD  ARG B  42      23.930   8.374  24.719  1.00180.82           C
ATOM   4221  NE  ARG B  42      23.259   7.394  23.819  1.00180.82           N
ATOM   4222  CZ  ARG B  42      21.900   7.269  23.853  1.00180.82           C
ATOM   4223  NH1 ARG B  42      21.171   8.004  24.744  1.00180.82           N
ATOM   4224  NH2 ARG B  42      21.273   6.396  23.011  1.00180.82           N
ATOM   4225  C   ARG B  42      25.614   8.268  29.471  1.00180.82           C
ATOM   4226  O   ARG B  42      26.760   8.084  29.052  1.00180.82           O
ATOM   4227  N   GLU B  43      25.399   8.851  30.664  1.00 86.22           N
ATOM   4228  CA  GLU B  43      26.481   9.348  31.478  1.00 86.22           C
ATOM   4229  CB  GLU B  43      25.998   9.958  32.805  1.00 86.22           C
ATOM   4230  CG  GLU B  43      25.234  11.268  32.596  1.00 86.22           C
ATOM   4231  CD  GLU B  43      24.846  11.832  33.953  1.00 86.22           C
ATOM   4232  OE1 GLU B  43      24.505  11.027  34.862  1.00 86.22           O
ATOM   4233  OE2 GLU B  43      24.886  13.081  34.100  1.00 86.22           O
ATOM   4234  C   GLU B  43      27.521   8.310  31.810  1.00 86.22           C
ATOM   4235  O   GLU B  43      28.708   8.634  31.844  1.00 86.22           O
ATOM   4236  N   ARG B  44      27.123   7.048  32.066  1.00170.27           N
ATOM   4237  CA  ARG B  44      28.027   6.031  32.545  1.00170.27           C
ATOM   4238  CB  ARG B  44      27.291   4.846  33.194  1.00170.27           C
ATOM   4239  CG  ARG B  44      26.264   5.231  34.260  1.00170.27           C
ATOM   4240  CD  ARG B  44      26.869   5.695  35.583  1.00170.27           C
ATOM   4241  NE  ARG B  44      26.962   7.177  35.512  1.00170.27           N
ATOM   4242  CZ  ARG B  44      26.646   7.933  36.600  1.00170.27           C
ATOM   4243  NH1 ARG B  44      26.290   7.328  37.771  1.00170.27           N
ATOM   4244  NH2 ARG B  44      26.675   9.294  36.509  1.00170.27           N
ATOM   4245  C   ARG B  44      28.870   5.413  31.460  1.00170.27           C
ATOM   4246  O   ARG B  44      28.449   5.270  30.314  1.00170.27           O
ATOM   4247  N   ILE B  45      30.102   5.003  31.848  1.00 55.26           N
ATOM   4248  CA  ILE B  45      31.057   4.315  31.017  1.00 55.26           C
ATOM   4249  CB  ILE B  45      32.263   5.144  30.671  1.00 55.26           C
ATOM   4250  CG1 ILE B  45      33.040   5.524  31.944  1.00 55.26           C
ATOM   4251  CG2 ILE B  45      31.790   6.350  29.841  1.00 55.26           C
ATOM   4252  CD1 ILE B  45      34.430   6.093  31.662  1.00 55.26           C
ATOM   4253  C   ILE B  45      31.526   3.140  31.835  1.00 55.26           C
ATOM   4254  O   ILE B  45      31.245   3.091  33.031  1.00 55.26           O
ATOM   4255  N   PRO B  46      32.209   2.175  31.262  1.00 78.24           N
ATOM   4256  CA  PRO B  46      32.627   1.025  32.028  1.00 78.24           C
ATOM   4257  CD  PRO B  46      32.045   1.858  29.852  1.00 78.24           C
ATOM   4258  CB  PRO B  46      33.134   0.008  31.005  1.00 78.24           C
ATOM   4259  CG  PRO B  46      32.342   0.352  29.729  1.00 78.24           C
ATOM   4260  C   PRO B  46      33.646   1.386  33.067  1.00 78.24           C
ATOM   4261  O   PRO B  46      34.462   2.271  32.825  1.00 78.24           O
ATOM   4262  N   GLU B  47      33.607   0.720  34.240  1.00 52.25           N
ATOM   4263  CA  GLU B  47      34.572   0.950  35.277  1.00 52.25           C
ATOM   4264  CB  GLU B  47      34.099   0.488  36.670  1.00 52.25           C
ATOM   4265  CG  GLU B  47      33.766  -1.006  36.718  1.00 52.25           C
ATOM   4266  CD  GLU B  47      33.434  -1.405  38.152  1.00 52.25           C
ATOM   4267  OE1 GLU B  47      33.117  -0.505  38.973  1.00 52.25           O
ATOM   4268  OE2 GLU B  47      33.505  -2.631  38.441  1.00 52.25           O
ATOM   4269  C   GLU B  47      35.795   0.158  34.916  1.00 52.25           C
ATOM   4270  O   GLU B  47      35.742  -0.719  34.056  1.00 52.25           O
ATOM   4271  N   ARG B  48      36.944   0.471  35.554  1.00112.96           N
ATOM   4272  CA  ARG B  48      38.184  -0.228  35.317  1.00112.96           C
ATOM   4273  CB  ARG B  48      39.320   0.289  36.212  1.00112.96           C
ATOM   4274  CG  ARG B  48      39.771   1.707  35.863  1.00112.96           C
ATOM   4275  CD  ARG B  48      40.544   2.392  36.989  1.00112.96           C
ATOM   4276  NE  ARG B  48      41.179   3.616  36.427  1.00112.96           N
ATOM   4277  CZ  ARG B  48      40.457   4.761  36.265  1.00112.96           C
ATOM   4278  NH1 ARG B  48      39.120   4.770  36.539  1.00112.96           N
ATOM   4279  NH2 ARG B  48      41.071   5.897  35.822  1.00112.96           N
ATOM   4280  C   ARG B  48      37.965  -1.674  35.646  1.00112.96           C
ATOM   4281  O   ARG B  48      37.294  -2.007  36.622  1.00112.96           O
ATOM   4282  N   VAL B  49      38.557  -2.577  34.831  1.00107.31           N
ATOM   4283  CA  VAL B  49      38.388  -3.990  35.037  1.00107.31           C
ATOM   4284  CB  VAL B  49      39.146  -4.831  34.045  1.00107.31           C
ATOM   4285  CG1 VAL B  49      40.652  -4.574  34.215  1.00107.31           C
ATOM   4286  CG2 VAL B  49      38.732  -6.302  34.229  1.00107.31           C
ATOM   4287  C   VAL B  49      38.863  -4.295  36.423  1.00107.31           C
ATOM   4288  O   VAL B  49      38.241  -5.073  37.145  1.00107.31           O
ATOM   4289  N   VAL B  50      39.994  -3.692  36.824  1.00131.49           N
ATOM   4290  CA  VAL B  50      40.476  -3.820  38.169  1.00131.49           C
ATOM   4291  CB  VAL B  50      41.601  -4.814  38.258  1.00131.49           C
ATOM   4292  CG1 VAL B  50      42.599  -4.560  37.122  1.00131.49           C
ATOM   4293  CG2 VAL B  50      42.222  -4.732  39.654  1.00131.49           C
ATOM   4294  C   VAL B  50      40.898  -2.429  38.584  1.00131.49           C
ATOM   4295  O   VAL B  50      41.109  -1.567  37.732  1.00131.49           O
ATOM   4296  N   HIS B  51      41.014  -2.170  39.907  1.00 87.74           N
ATOM   4297  CA  HIS B  51      41.344  -0.872  40.455  1.00 87.74           C
ATOM   4298  ND1 HIS B  51      44.472  -0.252  41.750  1.00 87.74           N
ATOM   4299  CG  HIS B  51      43.867  -0.852  40.667  1.00 87.74           C
ATOM   4300  CB  HIS B  51      42.678  -0.292  39.966  1.00 87.74           C
ATOM   4301  NE2 HIS B  51      45.610  -2.113  41.330  1.00 87.74           N
ATOM   4302  CD2 HIS B  51      44.574  -1.986  40.424  1.00 87.74           C
ATOM   4303  CE1 HIS B  51      45.510  -1.049  42.106  1.00 87.74           C
ATOM   4304  C   HIS B  51      40.313   0.155  40.114  1.00 87.74           C
ATOM   4305  O   HIS B  51      40.646   1.326  39.935  1.00 87.74           O
ATOM   4306  N   ALA B  52      39.034  -0.252  40.055  1.00 43.91           N
ATOM   4307  CA  ALA B  52      37.950   0.640  39.758  1.00 43.91           C
ATOM   4308  CB  ALA B  52      36.606  -0.101  39.666  1.00 43.91           C
ATOM   4309  C   ALA B  52      37.812   1.684  40.847  1.00 43.91           C
ATOM   4310  O   ALA B  52      37.521   2.843  40.558  1.00 43.91           O
ATOM   4311  N   ARG B  53      37.985   1.310  42.136  1.00151.43           N
ATOM   4312  CA  ARG B  53      37.846   2.271  43.209  1.00151.43           C
ATOM   4313  CB  ARG B  53      37.589   1.640  44.588  1.00151.43           C
ATOM   4314  CG  ARG B  53      37.831   2.622  45.738  1.00151.43           C
ATOM   4315  CD  ARG B  53      36.872   3.813  45.762  1.00151.43           C
ATOM   4316  NE  ARG B  53      35.796   3.494  46.740  1.00151.43           N
ATOM   4317  CZ  ARG B  53      35.125   4.506  47.361  1.00151.43           C
ATOM   4318  NH1 ARG B  53      35.433   5.806  47.074  1.00151.43           N
ATOM   4319  NH2 ARG B  53      34.147   4.218  48.270  1.00151.43           N
ATOM   4320  C   ARG B  53      39.119   3.060  43.345  1.00151.43           C
ATOM   4321  O   ARG B  53      40.179   2.494  43.609  1.00151.43           O
ATOM   4322  N   GLY B  54      39.045   4.409  43.222  1.00 38.37           N
ATOM   4323  CA  GLY B  54      40.271   5.167  43.298  1.00 38.37           C
ATOM   4324  C   GLY B  54      40.032   6.628  43.569  1.00 38.37           C
ATOM   4325  O   GLY B  54      38.899   7.104  43.629  1.00 38.37           O
ATOM   4326  N   ALA B  55      41.148   7.376  43.762  1.00 46.14           N
ATOM   4327  CA  ALA B  55      41.124   8.794  44.016  1.00 46.14           C
ATOM   4328  CB  ALA B  55      41.276   9.151  45.504  1.00 46.14           C
ATOM   4329  C   ALA B  55      42.289   9.415  43.297  1.00 46.14           C
ATOM   4330  O   ALA B  55      43.394   8.879  43.317  1.00 46.14           O
ATOM   4331  N   SER B  56      42.081  10.594  42.673  1.00 87.76           N
ATOM   4332  CA  SER B  56      43.121  11.217  41.895  1.00 87.76           C
ATOM   4333  CB  SER B  56      42.782  11.273  40.401  1.00 87.76           C
ATOM   4334  OG  SER B  56      43.755  12.053  39.728  1.00 87.76           O
ATOM   4335  C   SER B  56      43.336  12.638  42.324  1.00 87.76           C
ATOM   4336  O   SER B  56      42.422  13.278  42.844  1.00 87.76           O
ATOM   4337  N   ALA B  57      44.580  13.149  42.120  1.00 46.73           N
ATOM   4338  CA  ALA B  57      44.913  14.524  42.416  1.00 46.73           C
ATOM   4339  CB  ALA B  57      45.242  14.777  43.896  1.00 46.73           C
ATOM   4340  C   ALA B  57      46.113  14.952  41.610  1.00 46.73           C
ATOM   4341  O   ALA B  57      46.913  14.129  41.168  1.00 46.73           O
ATOM   4342  N   LYS B  58      46.259  16.280  41.389  1.00 89.19           N
ATOM   4343  CA  LYS B  58      47.367  16.802  40.628  1.00 89.19           C
ATOM   4344  CB  LYS B  58      47.007  17.929  39.653  1.00 89.19           C
ATOM   4345  CG  LYS B  58      46.323  17.408  38.391  1.00 89.19           C
ATOM   4346  CD  LYS B  58      45.632  18.504  37.590  1.00 89.19           C
ATOM   4347  CE  LYS B  58      44.654  19.314  38.438  1.00 89.19           C
ATOM   4348  NZ  LYS B  58      43.745  20.077  37.554  1.00 89.19           N
ATOM   4349  C   LYS B  58      48.454  17.312  41.522  1.00 89.19           C
ATOM   4350  O   LYS B  58      48.239  17.590  42.702  1.00 89.19           O
ATOM   4351  N   GLY B  59      49.677  17.439  40.955  1.00 29.76           N
ATOM   4352  CA  GLY B  59      50.793  17.908  41.726  1.00 29.76           C
ATOM   4353  C   GLY B  59      52.011  18.016  40.858  1.00 29.76           C
ATOM   4354  O   GLY B  59      51.931  18.023  39.629  1.00 29.76           O
ATOM   4355  N   PHE B  60      53.193  18.113  41.504  1.00 46.90           N
ATOM   4356  CA  PHE B  60      54.408  18.294  40.765  1.00 46.90           C
ATOM   4357  CB  PHE B  60      54.970  19.717  40.920  1.00 46.90           C
ATOM   4358  CG  PHE B  60      53.947  20.619  40.323  1.00 46.90           C
ATOM   4359  CD1 PHE B  60      52.809  20.941  41.026  1.00 46.90           C
ATOM   4360  CD2 PHE B  60      54.120  21.139  39.062  1.00 46.90           C
ATOM   4361  CE1 PHE B  60      51.857  21.769  40.481  1.00 46.90           C
ATOM   4362  CE2 PHE B  60      53.172  21.968  38.511  1.00 46.90           C
ATOM   4363  CZ  PHE B  60      52.038  22.283  39.221  1.00 46.90           C
ATOM   4364  C   PHE B  60      55.448  17.340  41.267  1.00 46.90           C
ATOM   4365  O   PHE B  60      55.422  16.912  42.421  1.00 46.90           O
ATOM   4366  N   PHE B  61      56.388  16.957  40.375  1.00 71.14           N
ATOM   4367  CA  PHE B  61      57.490  16.120  40.758  1.00 71.14           C
ATOM   4368  CB  PHE B  61      57.668  14.863  39.879  1.00 71.14           C
ATOM   4369  CG  PHE B  61      58.845  14.094  40.389  1.00 71.14           C
ATOM   4370  CD1 PHE B  61      58.746  13.348  41.544  1.00 71.14           C
ATOM   4371  CD2 PHE B  61      60.043  14.101  39.710  1.00 71.14           C
ATOM   4372  CE1 PHE B  61      59.822  12.635  42.018  1.00 71.14           C
ATOM   4373  CE2 PHE B  61      61.125  13.390  40.178  1.00 71.14           C
ATOM   4374  CZ  PHE B  61      61.015  12.658  41.336  1.00 71.14           C
ATOM   4375  C   PHE B  61      58.724  16.956  40.616  1.00 71.14           C
ATOM   4376  O   PHE B  61      58.907  17.640  39.609  1.00 71.14           O
ATOM   4377  N   GLU B  62      59.594  16.938  41.642  1.00 54.51           N
ATOM   4378  CA  GLU B  62      60.775  17.752  41.605  1.00 54.51           C
ATOM   4379  CB  GLU B  62      60.856  18.708  42.804  1.00 54.51           C
ATOM   4380  CG  GLU B  62      62.007  19.709  42.737  1.00 54.51           C
ATOM   4381  CD  GLU B  62      61.737  20.746  43.815  1.00 54.51           C
ATOM   4382  OE1 GLU B  62      61.449  20.336  44.971  1.00 54.51           O
ATOM   4383  OE2 GLU B  62      61.800  21.962  43.494  1.00 54.51           O
ATOM   4384  C   GLU B  62      61.964  16.850  41.657  1.00 54.51           C
ATOM   4385  O   GLU B  62      62.075  15.995  42.535  1.00 54.51           O
ATOM   4386  N   VAL B  63      62.904  17.033  40.709  1.00140.92           N
ATOM   4387  CA  VAL B  63      64.051  16.176  40.698  1.00140.92           C
ATOM   4388  CB  VAL B  63      64.622  15.971  39.331  1.00140.92           C
ATOM   4389  CG1 VAL B  63      65.857  15.085  39.461  1.00140.92           C
ATOM   4390  CG2 VAL B  63      63.552  15.339  38.441  1.00140.92           C
ATOM   4391  C   VAL B  63      65.119  16.785  41.550  1.00140.92           C
ATOM   4392  O   VAL B  63      65.580  17.899  41.300  1.00140.92           O
ATOM   4393  N   THR B  64      65.477  16.074  42.638  1.00122.11           N
ATOM   4394  CA  THR B  64      66.522  16.487  43.525  1.00122.11           C
ATOM   4395  CB  THR B  64      66.415  15.859  44.889  1.00122.11           C
ATOM   4396  OG1 THR B  64      67.235  16.559  45.812  1.00122.11           O
ATOM   4397  CG2 THR B  64      66.845  14.384  44.813  1.00122.11           C
ATOM   4398  C   THR B  64      67.874  16.178  42.946  1.00122.11           C
ATOM   4399  O   THR B  64      68.785  16.999  43.033  1.00122.11           O
ATOM   4400  N   HIS B  65      68.051  14.985  42.330  1.00 62.68           N
ATOM   4401  CA  HIS B  65      69.361  14.644  41.845  1.00 62.68           C
ATOM   4402  ND1 HIS B  65      71.810  14.957  44.013  1.00 62.68           N
ATOM   4403  CG  HIS B  65      70.654  14.212  43.964  1.00 62.68           C
ATOM   4404  CB  HIS B  65      70.113  13.610  42.702  1.00 62.68           C
ATOM   4405  NE2 HIS B  65      71.008  14.891  46.083  1.00 62.68           N
ATOM   4406  CD2 HIS B  65      70.176  14.181  45.236  1.00 62.68           C
ATOM   4407  CE1 HIS B  65      71.975  15.339  45.305  1.00 62.68           C
ATOM   4408  C   HIS B  65      69.308  14.118  40.445  1.00 62.68           C
ATOM   4409  O   HIS B  65      68.389  13.400  40.054  1.00 62.68           O
ATOM   4410  N   ASP B  66      70.357  14.489  39.681  1.00 69.89           N
ATOM   4411  CA  ASP B  66      70.628  14.171  38.306  1.00 69.89           C
ATOM   4412  CB  ASP B  66      71.944  14.856  37.870  1.00 69.89           C
ATOM   4413  CG  ASP B  66      72.231  14.705  36.385  1.00 69.89           C
ATOM   4414  OD1 ASP B  66      71.477  13.969  35.696  1.00 69.89           O
ATOM   4415  OD2 ASP B  66      73.215  15.338  35.918  1.00 69.89           O
ATOM   4416  C   ASP B  66      70.794  12.680  38.163  1.00 69.89           C
ATOM   4417  O   ASP B  66      71.553  12.055  38.897  1.00 69.89           O
ATOM   4418  N   ILE B  67      69.962  12.096  37.275  1.00164.36           N
ATOM   4419  CA  ILE B  67      69.811  10.749  36.778  1.00164.36           C
ATOM   4420  CB  ILE B  67      68.397  10.502  36.330  1.00164.36           C
ATOM   4421  CG1 ILE B  67      67.446  10.813  37.498  1.00164.36           C
ATOM   4422  CG2 ILE B  67      68.259   9.050  35.839  1.00164.36           C
ATOM   4423  CD1 ILE B  67      67.695   9.953  38.737  1.00164.36           C
ATOM   4424  C   ILE B  67      70.758  10.421  35.649  1.00164.36           C
ATOM   4425  O   ILE B  67      70.925   9.259  35.277  1.00164.36           O
ATOM   4426  N   SER B  68      71.330  11.454  35.008  1.00 66.73           N
ATOM   4427  CA  SER B  68      72.017  11.353  33.748  1.00 66.73           C
ATOM   4428  CB  SER B  68      72.812  12.625  33.400  1.00 66.73           C
ATOM   4429  OG  SER B  68      73.878  12.809  34.319  1.00 66.73           O
ATOM   4430  C   SER B  68      72.960  10.200  33.703  1.00 66.73           C
ATOM   4431  O   SER B  68      73.205   9.653  32.630  1.00 66.73           O
ATOM   4432  N   HIS B  69      73.531   9.771  34.831  1.00 98.69           N
ATOM   4433  CA  HIS B  69      74.425   8.661  34.710  1.00 98.69           C
ATOM   4434  ND1 HIS B  69      75.146  10.651  37.149  1.00 98.69           N
ATOM   4435  CG  HIS B  69      75.800   9.604  36.539  1.00 98.69           C
ATOM   4436  CB  HIS B  69      75.105   8.365  36.050  1.00 98.69           C
ATOM   4437  NE2 HIS B  69      77.287  11.230  37.022  1.00 98.69           N
ATOM   4438  CD2 HIS B  69      77.108   9.973  36.469  1.00 98.69           C
ATOM   4439  CE1 HIS B  69      76.083  11.596  37.416  1.00 98.69           C
ATOM   4440  C   HIS B  69      73.656   7.456  34.217  1.00 98.69           C
ATOM   4441  O   HIS B  69      74.139   6.723  33.356  1.00 98.69           O
ATOM   4442  N   LEU B  70      72.470   7.194  34.803  1.00 90.39           N
ATOM   4443  CA  LEU B  70      71.584   6.094  34.494  1.00 90.39           C
ATOM   4444  CB  LEU B  70      70.533   5.892  35.600  1.00 90.39           C
ATOM   4445  CG  LEU B  70      71.084   5.579  37.003  1.00 90.39           C
ATOM   4446  CD1 LEU B  70      69.933   5.421  38.009  1.00 90.39           C
ATOM   4447  CD2 LEU B  70      72.016   4.358  36.993  1.00 90.39           C
ATOM   4448  C   LEU B  70      70.766   6.263  33.245  1.00 90.39           C
ATOM   4449  O   LEU B  70      70.593   5.309  32.484  1.00 90.39           O
ATOM   4450  N   SER B  71      70.182   7.468  33.032  1.00105.81           N
ATOM   4451  CA  SER B  71      69.264   7.611  31.934  1.00105.81           C
ATOM   4452  CB  SER B  71      67.789   7.477  32.343  1.00105.81           C
ATOM   4453  OG  SER B  71      67.387   8.633  33.063  1.00105.81           O
ATOM   4454  C   SER B  71      69.364   8.970  31.309  1.00105.81           C
ATOM   4455  O   SER B  71      69.713   9.962  31.947  1.00105.81           O
ATOM   4456  N   CYS B  72      69.069   8.987  29.997  1.00121.70           N
ATOM   4457  CA  CYS B  72      69.013  10.098  29.092  1.00121.70           C
ATOM   4458  CB  CYS B  72      69.192   9.680  27.623  1.00121.70           C
ATOM   4459  SG  CYS B  72      69.404  11.103  26.513  1.00121.70           S
ATOM   4460  C   CYS B  72      67.716  10.851  29.212  1.00121.70           C
ATOM   4461  O   CYS B  72      67.574  11.889  28.568  1.00121.70           O
ATOM   4462  N   ALA B  73      66.706  10.318  29.945  1.00 64.76           N
ATOM   4463  CA  ALA B  73      65.412  10.955  30.033  1.00 64.76           C
ATOM   4464  CB  ALA B  73      64.489  10.333  31.097  1.00 64.76           C
ATOM   4465  C   ALA B  73      65.591  12.417  30.349  1.00 64.76           C
ATOM   4466  O   ALA B  73      66.330  12.795  31.257  1.00 64.76           O
ATOM   4467  N   ASP B  74      64.886  13.276  29.579  1.00111.35           N
ATOM   4468  CA  ASP B  74      65.098  14.700  29.629  1.00111.35           C
ATOM   4469  CB  ASP B  74      64.294  15.510  28.595  1.00111.35           C
ATOM   4470  CG  ASP B  74      62.821  15.475  28.974  1.00111.35           C
ATOM   4471  OD1 ASP B  74      62.232  14.363  28.996  1.00111.35           O
ATOM   4472  OD2 ASP B  74      62.268  16.572  29.260  1.00111.35           O
ATOM   4473  C   ASP B  74      64.764  15.285  30.970  1.00111.35           C
ATOM   4474  O   ASP B  74      65.505  16.130  31.471  1.00111.35           O
ATOM   4475  N   PHE B  75      63.655  14.861  31.606  1.00105.41           N
ATOM   4476  CA  PHE B  75      63.270  15.516  32.831  1.00105.41           C
ATOM   4477  CB  PHE B  75      61.820  15.247  33.323  1.00105.41           C
ATOM   4478  CG  PHE B  75      61.561  13.852  33.794  1.00105.41           C
ATOM   4479  CD1 PHE B  75      61.346  12.830  32.899  1.00105.41           C
ATOM   4480  CD2 PHE B  75      61.486  13.575  35.143  1.00105.41           C
ATOM   4481  CE1 PHE B  75      61.085  11.553  33.340  1.00105.41           C
ATOM   4482  CE2 PHE B  75      61.224  12.300  35.591  1.00105.41           C
ATOM   4483  CZ  PHE B  75      61.024  11.283  34.687  1.00105.41           C
ATOM   4484  C   PHE B  75      64.254  15.257  33.939  1.00105.41           C
ATOM   4485  O   PHE B  75      64.383  16.074  34.852  1.00105.41           O
ATOM   4486  N   LEU B  76      64.918  14.083  33.920  1.00144.23           N
ATOM   4487  CA  LEU B  76      65.876  13.631  34.906  1.00144.23           C
ATOM   4488  CB  LEU B  76      66.214  12.133  34.811  1.00144.23           C
ATOM   4489  CG  LEU B  76      65.062  11.183  35.183  1.00144.23           C
ATOM   4490  CD1 LEU B  76      64.611  11.387  36.640  1.00144.23           C
ATOM   4491  CD2 LEU B  76      63.921  11.267  34.162  1.00144.23           C
ATOM   4492  C   LEU B  76      67.204  14.346  34.861  1.00144.23           C
ATOM   4493  O   LEU B  76      68.010  14.189  35.777  1.00144.23           O
ATOM   4494  N   ARG B  77      67.528  15.048  33.762  1.00182.59           N
ATOM   4495  CA  ARG B  77      68.838  15.618  33.556  1.00182.59           C
ATOM   4496  CB  ARG B  77      68.927  16.340  32.200  1.00182.59           C
ATOM   4497  CG  ARG B  77      70.258  17.055  31.961  1.00182.59           C
ATOM   4498  CD  ARG B  77      71.461  16.117  31.842  1.00182.59           C
ATOM   4499  NE  ARG B  77      71.507  15.610  30.442  1.00182.59           N
ATOM   4500  CZ  ARG B  77      72.663  15.076  29.950  1.00182.59           C
ATOM   4501  NH1 ARG B  77      73.784  15.034  30.729  1.00182.59           N
ATOM   4502  NH2 ARG B  77      72.699  14.581  28.678  1.00182.59           N
ATOM   4503  C   ARG B  77      69.271  16.601  34.615  1.00182.59           C
ATOM   4504  O   ARG B  77      70.390  16.498  35.117  1.00182.59           O
ATOM   4505  N   ALA B  78      68.434  17.578  35.013  1.00 41.33           N
ATOM   4506  CA  ALA B  78      68.976  18.547  35.930  1.00 41.33           C
ATOM   4507  CB  ALA B  78      69.009  19.977  35.360  1.00 41.33           C
ATOM   4508  C   ALA B  78      68.158  18.596  37.178  1.00 41.33           C
ATOM   4509  O   ALA B  78      66.942  18.416  37.168  1.00 41.33           O
ATOM   4510  N   PRO B  79      68.827  18.836  38.275  1.00 81.82           N
ATOM   4511  CA  PRO B  79      68.103  18.956  39.502  1.00 81.82           C
ATOM   4512  CD  PRO B  79      70.140  18.259  38.499  1.00 81.82           C
ATOM   4513  CB  PRO B  79      69.118  18.778  40.635  1.00 81.82           C
ATOM   4514  CG  PRO B  79      70.486  18.709  39.928  1.00 81.82           C
ATOM   4515  C   PRO B  79      67.337  20.234  39.519  1.00 81.82           C
ATOM   4516  O   PRO B  79      67.802  21.215  38.941  1.00 81.82           O
ATOM   4517  N   GLY B  80      66.151  20.232  40.157  1.00 26.26           N
ATOM   4518  CA  GLY B  80      65.355  21.417  40.258  1.00 26.26           C
ATOM   4519  C   GLY B  80      64.299  21.445  39.191  1.00 26.26           C
ATOM   4520  O   GLY B  80      63.383  22.262  39.257  1.00 26.26           O
ATOM   4521  N   VAL B  81      64.380  20.553  38.184  1.00 35.74           N
ATOM   4522  CA  VAL B  81      63.391  20.550  37.137  1.00 35.74           C
ATOM   4523  CB  VAL B  81      63.702  19.587  36.026  1.00 35.74           C
ATOM   4524  CG1 VAL B  81      62.544  19.602  35.011  1.00 35.74           C
ATOM   4525  CG2 VAL B  81      65.074  19.936  35.426  1.00 35.74           C
ATOM   4526  C   VAL B  81      62.104  20.083  37.733  1.00 35.74           C
ATOM   4527  O   VAL B  81      62.097  19.152  38.535  1.00 35.74           O
ATOM   4528  N   GLN B  82      60.976  20.726  37.365  1.00 38.28           N
ATOM   4529  CA  GLN B  82      59.721  20.296  37.910  1.00 38.28           C
ATOM   4530  CB  GLN B  82      58.981  21.365  38.735  1.00 38.28           C
ATOM   4531  CG  GLN B  82      59.690  21.730  40.043  1.00 38.28           C
ATOM   4532  CD  GLN B  82      58.798  22.690  40.815  1.00 38.28           C
ATOM   4533  OE1 GLN B  82      58.273  23.655  40.263  1.00 38.28           O
ATOM   4534  NE2 GLN B  82      58.606  22.413  42.133  1.00 38.28           N
ATOM   4535  C   GLN B  82      58.821  19.893  36.786  1.00 38.28           C
ATOM   4536  O   GLN B  82      58.782  20.530  35.735  1.00 38.28           O
ATOM   4537  N   THR B  83      58.074  18.789  36.986  1.00106.05           N
ATOM   4538  CA  THR B  83      57.173  18.330  35.970  1.00106.05           C
ATOM   4539  CB  THR B  83      57.542  16.988  35.418  1.00106.05           C
ATOM   4540  OG1 THR B  83      57.459  16.008  36.443  1.00106.05           O
ATOM   4541  CG2 THR B  83      58.974  17.054  34.866  1.00106.05           C
ATOM   4542  C   THR B  83      55.818  18.172  36.589  1.00106.05           C
ATOM   4543  O   THR B  83      55.680  17.740  37.733  1.00106.05           O
ATOM   4544  N   PRO B  84      54.799  18.523  35.854  1.00 66.08           N
ATOM   4545  CA  PRO B  84      53.475  18.352  36.386  1.00 66.08           C
ATOM   4546  CD  PRO B  84      54.886  19.700  35.002  1.00 66.08           C
ATOM   4547  CB  PRO B  84      52.560  19.200  35.505  1.00 66.08           C
ATOM   4548  CG  PRO B  84      53.485  20.333  35.022  1.00 66.08           C
ATOM   4549  C   PRO B  84      53.119  16.899  36.437  1.00 66.08           C
ATOM   4550  O   PRO B  84      53.605  16.138  35.599  1.00 66.08           O
ATOM   4551  N   VAL B  85      52.294  16.484  37.421  1.00 47.41           N
ATOM   4552  CA  VAL B  85      51.906  15.103  37.486  1.00 47.41           C
ATOM   4553  CB  VAL B  85      52.702  14.283  38.466  1.00 47.41           C
ATOM   4554  CG1 VAL B  85      54.171  14.248  38.008  1.00 47.41           C
ATOM   4555  CG2 VAL B  85      52.492  14.856  39.879  1.00 47.41           C
ATOM   4556  C   VAL B  85      50.470  15.008  37.902  1.00 47.41           C
ATOM   4557  O   VAL B  85      49.913  15.917  38.517  1.00 47.41           O
ATOM   4558  N   ILE B  86      49.820  13.894  37.511  1.00147.96           N
ATOM   4559  CA  ILE B  86      48.488  13.584  37.942  1.00147.96           C
ATOM   4560  CB  ILE B  86      47.495  13.604  36.805  1.00147.96           C
ATOM   4561  CG1 ILE B  86      46.051  13.427  37.297  1.00147.96           C
ATOM   4562  CG2 ILE B  86      47.932  12.557  35.771  1.00147.96           C
ATOM   4563  CD1 ILE B  86      45.758  12.019  37.808  1.00147.96           C
ATOM   4564  C   ILE B  86      48.598  12.211  38.545  1.00147.96           C
ATOM   4565  O   ILE B  86      49.116  11.290  37.916  1.00147.96           O
ATOM   4566  N   VAL B  87      48.121  12.031  39.796  1.00106.01           N
ATOM   4567  CA  VAL B  87      48.289  10.762  40.452  1.00106.01           C
ATOM   4568  CB  VAL B  87      48.977  10.890  41.781  1.00106.01           C
ATOM   4569  CG1 VAL B  87      48.099  11.770  42.691  1.00106.01           C
ATOM   4570  CG2 VAL B  87      49.221   9.480  42.346  1.00106.01           C
ATOM   4571  C   VAL B  87      46.949  10.152  40.738  1.00106.01           C
ATOM   4572  O   VAL B  87      45.964  10.861  40.946  1.00106.01           O
ATOM   4573  N   ARG B  88      46.877   8.799  40.716  1.00157.37           N
ATOM   4574  CA  ARG B  88      45.658   8.147  41.111  1.00157.37           C
ATOM   4575  CB  ARG B  88      44.765   7.682  39.953  1.00157.37           C
ATOM   4576  CG  ARG B  88      43.307   7.508  40.386  1.00157.37           C
ATOM   4577  CD  ARG B  88      42.355   7.223  39.229  1.00157.37           C
ATOM   4578  NE  ARG B  88      42.529   5.790  38.875  1.00157.37           N
ATOM   4579  CZ  ARG B  88      41.714   4.846  39.430  1.00157.37           C
ATOM   4580  NH1 ARG B  88      40.649   5.222  40.194  1.00157.37           N
ATOM   4581  NH2 ARG B  88      41.966   3.522  39.213  1.00157.37           N
ATOM   4582  C   ARG B  88      46.016   6.974  41.972  1.00157.37           C
ATOM   4583  O   ARG B  88      46.908   6.192  41.643  1.00157.37           O
ATOM   4584  N   PHE B  89      45.327   6.840  43.126  1.00161.84           N
ATOM   4585  CA  PHE B  89      45.552   5.757  44.042  1.00161.84           C
ATOM   4586  CB  PHE B  89      45.778   6.217  45.494  1.00161.84           C
ATOM   4587  CG  PHE B  89      46.899   7.202  45.529  1.00161.84           C
ATOM   4588  CD1 PHE B  89      48.210   6.789  45.554  1.00161.84           C
ATOM   4589  CD2 PHE B  89      46.628   8.552  45.525  1.00161.84           C
ATOM   4590  CE1 PHE B  89      49.230   7.713  45.585  1.00161.84           C
ATOM   4591  CE2 PHE B  89      47.644   9.479  45.556  1.00161.84           C
ATOM   4592  CZ  PHE B  89      48.951   9.059  45.587  1.00161.84           C
ATOM   4593  C   PHE B  89      44.272   4.973  44.052  1.00161.84           C
ATOM   4594  O   PHE B  89      43.204   5.547  43.843  1.00161.84           O
ATOM   4595  N   SER B  90      44.347   3.643  44.294  1.00120.08           N
ATOM   4596  CA  SER B  90      43.156   2.837  44.198  1.00120.08           C
ATOM   4597  CB  SER B  90      42.861   2.334  42.774  1.00120.08           C
ATOM   4598  OG  SER B  90      42.529   3.397  41.901  1.00120.08           O
ATOM   4599  C   SER B  90      43.301   1.561  44.970  1.00120.08           C
ATOM   4600  O   SER B  90      44.374   1.222  45.463  1.00120.08           O
ATOM   4601  N   THR B  91      42.166   0.833  45.111  1.00 88.83           N
ATOM   4602  CA  THR B  91      42.143  -0.509  45.624  1.00 88.83           C
ATOM   4603  CB  THR B  91      40.919  -0.839  46.429  1.00 88.83           C
ATOM   4604  OG1 THR B  91      39.748  -0.679  45.640  1.00 88.83           O
ATOM   4605  CG2 THR B  91      40.873   0.089  47.655  1.00 88.83           C
ATOM   4606  C   THR B  91      42.166  -1.366  44.384  1.00 88.83           C
ATOM   4607  O   THR B  91      42.377  -0.826  43.299  1.00 88.83           O
ATOM   4608  N   VAL B  92      42.190  -2.712  44.516  1.00128.06           N
ATOM   4609  CA  VAL B  92      42.197  -3.567  43.352  1.00128.06           C
ATOM   4610  CB  VAL B  92      43.179  -4.685  43.540  1.00128.06           C
ATOM   4611  CG1 VAL B  92      43.163  -5.594  42.305  1.00128.06           C
ATOM   4612  CG2 VAL B  92      44.553  -4.070  43.849  1.00128.06           C
ATOM   4613  C   VAL B  92      40.917  -4.194  42.859  1.00128.06           C
ATOM   4614  O   VAL B  92      40.441  -3.958  41.748  1.00128.06           O
ATOM   4615  N   ILE B  93      40.354  -5.070  43.722  1.00144.83           N
ATOM   4616  CA  ILE B  93      39.345  -6.027  43.352  1.00144.83           C
ATOM   4617  CB  ILE B  93      39.283  -7.159  44.331  1.00144.83           C
ATOM   4618  CG1 ILE B  93      40.666  -7.832  44.438  1.00144.83           C
ATOM   4619  CG2 ILE B  93      38.172  -8.113  43.871  1.00144.83           C
ATOM   4620  CD1 ILE B  93      41.197  -8.359  43.104  1.00144.83           C
ATOM   4621  C   ILE B  93      37.951  -5.511  43.166  1.00144.83           C
ATOM   4622  O   ILE B  93      37.301  -5.811  42.167  1.00144.83           O
ATOM   4623  N   HIS B  94      37.455  -4.727  44.131  1.00 82.04           N
ATOM   4624  CA  HIS B  94      36.072  -4.347  44.137  1.00 82.04           C
ATOM   4625  ND1 HIS B  94      36.758  -5.728  47.088  1.00 82.04           N
ATOM   4626  CG  HIS B  94      35.636  -5.332  46.397  1.00 82.04           C
ATOM   4627  CB  HIS B  94      35.558  -4.089  45.562  1.00 82.04           C
ATOM   4628  NE2 HIS B  94      35.217  -7.295  47.432  1.00 82.04           N
ATOM   4629  CD2 HIS B  94      34.703  -6.302  46.620  1.00 82.04           C
ATOM   4630  CE1 HIS B  94      36.453  -6.907  47.689  1.00 82.04           C
ATOM   4631  C   HIS B  94      35.821  -3.161  43.253  1.00 82.04           C
ATOM   4632  O   HIS B  94      36.741  -2.480  42.806  1.00 82.04           O
ATOM   4633  N   GLU B  95      34.523  -2.912  42.962  1.00129.85           N
ATOM   4634  CA  GLU B  95      34.034  -1.919  42.045  1.00129.85           C
ATOM   4635  CB  GLU B  95      32.688  -2.344  41.422  1.00129.85           C
ATOM   4636  CG  GLU B  95      31.692  -2.905  42.444  1.00129.85           C
ATOM   4637  CD  GLU B  95      31.876  -4.410  42.581  1.00129.85           C
ATOM   4638  OE1 GLU B  95      32.647  -4.986  41.770  1.00129.85           O
ATOM   4639  OE2 GLU B  95      31.241  -5.005  43.493  1.00129.85           O
ATOM   4640  C   GLU B  95      33.905  -0.551  42.663  1.00129.85           C
ATOM   4641  O   GLU B  95      34.220  -0.343  43.833  1.00129.85           O
ATOM   4642  N   ARG B  96      33.465   0.438  41.849  1.00203.44           N
ATOM   4643  CA  ARG B  96      33.415   1.798  42.318  1.00203.44           C
ATOM   4644  CB  ARG B  96      32.991   2.849  41.284  1.00203.44           C
ATOM   4645  CG  ARG B  96      33.304   4.268  41.772  1.00203.44           C
ATOM   4646  CD  ARG B  96      32.671   5.367  40.924  1.00203.44           C
ATOM   4647  NE  ARG B  96      33.078   5.111  39.516  1.00203.44           N
ATOM   4648  CZ  ARG B  96      32.884   6.062  38.557  1.00203.44           C
ATOM   4649  NH1 ARG B  96      32.363   7.278  38.892  1.00203.44           N
ATOM   4650  NH2 ARG B  96      33.215   5.790  37.262  1.00203.44           N
ATOM   4651  C   ARG B  96      32.487   1.914  43.482  1.00203.44           C
ATOM   4652  O   ARG B  96      31.436   1.306  43.508  1.00203.44           O
ATOM   4653  N   GLY B  97      32.851   2.698  44.510  1.00 25.93           N
ATOM   4654  CA  GLY B  97      31.951   2.864  45.615  1.00 25.93           C
ATOM   4655  C   GLY B  97      32.142   1.743  46.589  1.00 25.93           C
ATOM   4656  O   GLY B  97      31.391   1.616  47.556  1.00 25.93           O
ATOM   4657  N   SER B  98      33.149   0.886  46.342  1.00 94.26           N
ATOM   4658  CA  SER B  98      33.465  -0.184  47.246  1.00 94.26           C
ATOM   4659  CB  SER B  98      34.414  -1.233  46.661  1.00 94.26           C
ATOM   4660  OG  SER B  98      33.709  -2.024  45.720  1.00 94.26           O
ATOM   4661  C   SER B  98      34.138   0.414  48.442  1.00 94.26           C
ATOM   4662  O   SER B  98      34.682   1.514  48.374  1.00 94.26           O
ATOM   4663  N   PRO B  99      34.124  -0.272  49.553  1.00162.51           N
ATOM   4664  CA  PRO B  99      34.756   0.254  50.727  1.00162.51           C
ATOM   4665  CD  PRO B  99      33.104  -1.255  49.871  1.00162.51           C
ATOM   4666  CB  PRO B  99      34.280  -0.612  51.897  1.00162.51           C
ATOM   4667  CG  PRO B  99      33.562  -1.807  51.232  1.00162.51           C
ATOM   4668  C   PRO B  99      36.239   0.306  50.540  1.00162.51           C
ATOM   4669  O   PRO B  99      36.799  -0.531  49.834  1.00162.51           O
ATOM   4670  N   GLU B 100      36.869   1.353  51.099  1.00118.64           N
ATOM   4671  CA  GLU B 100      38.283   1.591  51.085  1.00118.64           C
ATOM   4672  CB  GLU B 100      38.653   3.079  51.059  1.00118.64           C
ATOM   4673  CG  GLU B 100      38.359   3.623  49.656  1.00118.64           C
ATOM   4674  CD  GLU B 100      38.710   5.095  49.550  1.00118.64           C
ATOM   4675  OE1 GLU B 100      38.285   5.877  50.441  1.00118.64           O
ATOM   4676  OE2 GLU B 100      39.397   5.457  48.557  1.00118.64           O
ATOM   4677  C   GLU B 100      39.020   0.830  52.159  1.00118.64           C
ATOM   4678  O   GLU B 100      40.242   0.921  52.254  1.00118.64           O
ATOM   4679  N   THR B 101      38.279   0.205  53.088  1.00104.20           N
ATOM   4680  CA  THR B 101      38.764  -0.552  54.221  1.00104.20           C
ATOM   4681  CB  THR B 101      37.779  -0.594  55.357  1.00104.20           C
ATOM   4682  OG1 THR B 101      36.544  -1.143  54.925  1.00104.20           O
ATOM   4683  CG2 THR B 101      37.578   0.838  55.889  1.00104.20           C
ATOM   4684  C   THR B 101      39.199  -1.964  53.903  1.00104.20           C
ATOM   4685  O   THR B 101      39.687  -2.656  54.795  1.00104.20           O
ATOM   4686  N   LEU B 102      38.926  -2.478  52.686  1.00 75.59           N
ATOM   4687  CA  LEU B 102      39.185  -3.857  52.339  1.00 75.59           C
ATOM   4688  CB  LEU B 102      38.401  -4.280  51.086  1.00 75.59           C
ATOM   4689  CG  LEU B 102      36.887  -4.034  51.247  1.00 75.59           C
ATOM   4690  CD1 LEU B 102      36.089  -4.517  50.027  1.00 75.59           C
ATOM   4691  CD2 LEU B 102      36.370  -4.604  52.577  1.00 75.59           C
ATOM   4692  C   LEU B 102      40.646  -4.142  52.111  1.00 75.59           C
ATOM   4693  O   LEU B 102      41.423  -3.257  51.751  1.00 75.59           O
ATOM   4694  N   ARG B 103      41.066  -5.415  52.345  1.00178.00           N
ATOM   4695  CA  ARG B 103      42.448  -5.764  52.142  1.00178.00           C
ATOM   4696  CB  ARG B 103      42.992  -6.944  52.994  1.00178.00           C
ATOM   4697  CG  ARG B 103      42.404  -8.326  52.709  1.00178.00           C
ATOM   4698  CD  ARG B 103      42.502  -9.323  53.880  1.00178.00           C
ATOM   4699  NE  ARG B 103      43.931  -9.617  54.202  1.00178.00           N
ATOM   4700  CZ  ARG B 103      44.602  -8.889  55.143  1.00178.00           C
ATOM   4701  NH1 ARG B 103      44.003  -7.818  55.743  1.00178.00           N
ATOM   4702  NH2 ARG B 103      45.874  -9.236  55.497  1.00178.00           N
ATOM   4703  C   ARG B 103      42.667  -6.045  50.686  1.00178.00           C
ATOM   4704  O   ARG B 103      41.941  -6.816  50.057  1.00178.00           O
ATOM   4705  N   ASP B 104      43.692  -5.379  50.119  1.00116.11           N
ATOM   4706  CA  ASP B 104      44.061  -5.478  48.737  1.00116.11           C
ATOM   4707  CB  ASP B 104      43.108  -4.783  47.744  1.00116.11           C
ATOM   4708  CG  ASP B 104      41.986  -5.726  47.345  1.00116.11           C
ATOM   4709  OD1 ASP B 104      42.305  -6.880  46.954  1.00116.11           O
ATOM   4710  OD2 ASP B 104      40.802  -5.299  47.394  1.00116.11           O
ATOM   4711  C   ASP B 104      45.353  -4.749  48.602  1.00116.11           C
ATOM   4712  O   ASP B 104      45.758  -4.014  49.501  1.00116.11           O
ATOM   4713  N   PRO B 105      46.026  -4.945  47.504  1.00 91.14           N
ATOM   4714  CA  PRO B 105      47.188  -4.146  47.257  1.00 91.14           C
ATOM   4715  CD  PRO B 105      46.110  -6.250  46.866  1.00 91.14           C
ATOM   4716  CB  PRO B 105      47.899  -4.799  46.073  1.00 91.14           C
ATOM   4717  CG  PRO B 105      47.493  -6.281  46.183  1.00 91.14           C
ATOM   4718  C   PRO B 105      46.617  -2.793  46.965  1.00 91.14           C
ATOM   4719  O   PRO B 105      45.415  -2.714  46.718  1.00 91.14           O
ATOM   4720  N   ARG B 106      47.413  -1.713  47.051  1.00150.15           N
ATOM   4721  CA  ARG B 106      46.877  -0.421  46.722  1.00150.15           C
ATOM   4722  CB  ARG B 106      46.976   0.622  47.848  1.00150.15           C
ATOM   4723  CG  ARG B 106      45.829   0.564  48.861  1.00150.15           C
ATOM   4724  CD  ARG B 106      45.799  -0.708  49.706  1.00150.15           C
ATOM   4725  NE  ARG B 106      44.772  -0.511  50.770  1.00150.15           N
ATOM   4726  CZ  ARG B 106      43.485  -0.920  50.578  1.00150.15           C
ATOM   4727  NH1 ARG B 106      43.136  -1.552  49.420  1.00150.15           N
ATOM   4728  NH2 ARG B 106      42.552  -0.707  51.553  1.00150.15           N
ATOM   4729  C   ARG B 106      47.641   0.105  45.549  1.00150.15           C
ATOM   4730  O   ARG B 106      48.871   0.126  45.551  1.00150.15           O
ATOM   4731  N   GLY B 107      46.906   0.548  44.506  1.00 37.91           N
ATOM   4732  CA  GLY B 107      47.504   1.049  43.299  1.00 37.91           C
ATOM   4733  C   GLY B 107      48.094   2.401  43.541  1.00 37.91           C
ATOM   4734  O   GLY B 107      47.557   3.209  44.299  1.00 37.91           O
ATOM   4735  N   PHE B 108      49.230   2.669  42.864  1.00165.87           N
ATOM   4736  CA  PHE B 108      49.933   3.914  42.982  1.00165.87           C
ATOM   4737  CB  PHE B 108      51.241   3.700  43.780  1.00165.87           C
ATOM   4738  CG  PHE B 108      51.825   4.970  44.306  1.00165.87           C
ATOM   4739  CD1 PHE B 108      52.477   5.857  43.482  1.00165.87           C
ATOM   4740  CD2 PHE B 108      51.752   5.251  45.654  1.00165.87           C
ATOM   4741  CE1 PHE B 108      53.019   7.015  43.991  1.00165.87           C
ATOM   4742  CE2 PHE B 108      52.293   6.407  46.167  1.00165.87           C
ATOM   4743  CZ  PHE B 108      52.927   7.294  45.333  1.00165.87           C
ATOM   4744  C   PHE B 108      50.303   4.296  41.572  1.00165.87           C
ATOM   4745  O   PHE B 108      51.297   3.803  41.041  1.00165.87           O
ATOM   4746  N   ALA B 109      49.539   5.208  40.929  1.00 49.52           N
ATOM   4747  CA  ALA B 109      49.821   5.534  39.552  1.00 49.52           C
ATOM   4748  CB  ALA B 109      48.646   5.262  38.600  1.00 49.52           C
ATOM   4749  C   ALA B 109      50.147   6.998  39.437  1.00 49.52           C
ATOM   4750  O   ALA B 109      49.497   7.837  40.062  1.00 49.52           O
ATOM   4751  N   VAL B 110      51.187   7.337  38.634  1.00 55.51           N
ATOM   4752  CA  VAL B 110      51.537   8.720  38.445  1.00 55.51           C
ATOM   4753  CB  VAL B 110      52.717   9.159  39.269  1.00 55.51           C
ATOM   4754  CG1 VAL B 110      53.077  10.609  38.900  1.00 55.51           C
ATOM   4755  CG2 VAL B 110      52.370   8.979  40.758  1.00 55.51           C
ATOM   4756  C   VAL B 110      51.868   8.969  37.000  1.00 55.51           C
ATOM   4757  O   VAL B 110      52.703   8.286  36.404  1.00 55.51           O
ATOM   4758  N   LYS B 111      51.217   9.995  36.411  1.00114.74           N
ATOM   4759  CA  LYS B 111      51.427  10.378  35.043  1.00114.74           C
ATOM   4760  CB  LYS B 111      50.116  10.753  34.327  1.00114.74           C
ATOM   4761  CG  LYS B 111      50.289  11.149  32.859  1.00114.74           C
ATOM   4762  CD  LYS B 111      48.959  11.259  32.108  1.00114.74           C
ATOM   4763  CE  LYS B 111      48.149   9.961  32.094  1.00114.74           C
ATOM   4764  NZ  LYS B 111      48.775   8.978  31.179  1.00114.74           N
ATOM   4765  C   LYS B 111      52.295  11.602  35.057  1.00114.74           C
ATOM   4766  O   LYS B 111      51.965  12.598  35.700  1.00114.74           O
ATOM   4767  N   PHE B 112      53.441  11.547  34.345  1.00 80.17           N
ATOM   4768  CA  PHE B 112      54.363  12.650  34.290  1.00 80.17           C
ATOM   4769  CB  PHE B 112      55.836  12.202  34.336  1.00 80.17           C
ATOM   4770  CG  PHE B 112      56.134  11.499  35.620  1.00 80.17           C
ATOM   4771  CD1 PHE B 112      55.665  10.225  35.843  1.00 80.17           C
ATOM   4772  CD2 PHE B 112      56.909  12.096  36.589  1.00 80.17           C
ATOM   4773  CE1 PHE B 112      55.944   9.565  37.018  1.00 80.17           C
ATOM   4774  CE2 PHE B 112      57.193  11.443  37.768  1.00 80.17           C
ATOM   4775  CZ  PHE B 112      56.708  10.174  37.984  1.00 80.17           C
ATOM   4776  C   PHE B 112      54.189  13.282  32.941  1.00 80.17           C
ATOM   4777  O   PHE B 112      54.313  12.613  31.916  1.00 80.17           O
ATOM   4778  N   TYR B 113      53.920  14.603  32.896  1.00141.85           N
ATOM   4779  CA  TYR B 113      53.750  15.244  31.621  1.00141.85           C
ATOM   4780  CB  TYR B 113      52.704  16.375  31.644  1.00141.85           C
ATOM   4781  CG  TYR B 113      51.386  15.816  32.078  1.00141.85           C
ATOM   4782  CD1 TYR B 113      50.490  15.318  31.158  1.00141.85           C
ATOM   4783  CD2 TYR B 113      51.045  15.786  33.411  1.00141.85           C
ATOM   4784  CE1 TYR B 113      49.279  14.803  31.561  1.00141.85           C
ATOM   4785  CE2 TYR B 113      49.834  15.275  33.822  1.00141.85           C
ATOM   4786  CZ  TYR B 113      48.947  14.783  32.895  1.00141.85           C
ATOM   4787  OH  TYR B 113      47.704  14.258  33.310  1.00141.85           O
ATOM   4788  C   TYR B 113      55.076  15.873  31.326  1.00141.85           C
ATOM   4789  O   TYR B 113      55.358  16.989  31.764  1.00141.85           O
ATOM   4790  N   THR B 114      55.910  15.146  30.553  1.00 60.92           N
ATOM   4791  CA  THR B 114      57.274  15.507  30.273  1.00 60.92           C
ATOM   4792  CB  THR B 114      58.161  14.277  30.187  1.00 60.92           C
ATOM   4793  OG1 THR B 114      58.119  13.561  31.411  1.00 60.92           O
ATOM   4794  CG2 THR B 114      59.622  14.645  29.864  1.00 60.92           C
ATOM   4795  C   THR B 114      57.361  16.251  28.974  1.00 60.92           C
ATOM   4796  O   THR B 114      56.458  16.214  28.144  1.00 60.92           O
ATOM   4797  N   ARG B 115      58.486  16.967  28.786  1.00105.00           N
ATOM   4798  CA  ARG B 115      58.777  17.709  27.596  1.00105.00           C
ATOM   4799  CB  ARG B 115      60.109  18.464  27.694  1.00105.00           C
ATOM   4800  CG  ARG B 115      60.098  19.529  28.788  1.00105.00           C
ATOM   4801  CD  ARG B 115      61.400  20.319  28.896  1.00105.00           C
ATOM   4802  NE  ARG B 115      61.133  21.444  29.831  1.00105.00           N
ATOM   4803  CZ  ARG B 115      60.504  22.559  29.361  1.00105.00           C
ATOM   4804  NH1 ARG B 115      60.128  22.625  28.050  1.00105.00           N
ATOM   4805  NH2 ARG B 115      60.247  23.605  30.198  1.00105.00           N
ATOM   4806  C   ARG B 115      58.899  16.739  26.458  1.00105.00           C
ATOM   4807  O   ARG B 115      58.608  17.075  25.314  1.00105.00           O
ATOM   4808  N   GLU B 116      59.451  15.546  26.746  1.00137.19           N
ATOM   4809  CA  GLU B 116      59.661  14.443  25.846  1.00137.19           C
ATOM   4810  CB  GLU B 116      60.945  13.648  26.129  1.00137.19           C
ATOM   4811  CG  GLU B 116      62.174  14.506  25.798  1.00137.19           C
ATOM   4812  CD  GLU B 116      63.420  13.638  25.726  1.00137.19           C
ATOM   4813  OE1 GLU B 116      63.318  12.413  26.001  1.00137.19           O
ATOM   4814  OE2 GLU B 116      64.497  14.195  25.381  1.00137.19           O
ATOM   4815  C   GLU B 116      58.479  13.524  25.698  1.00137.19           C
ATOM   4816  O   GLU B 116      58.622  12.480  25.064  1.00137.19           O
ATOM   4817  N   GLY B 117      57.358  13.759  26.410  1.00 47.48           N
ATOM   4818  CA  GLY B 117      56.211  12.899  26.271  1.00 47.48           C
ATOM   4819  C   GLY B 117      55.744  12.516  27.643  1.00 47.48           C
ATOM   4820  O   GLY B 117      56.316  12.938  28.647  1.00 47.48           O
ATOM   4821  N   ASN B 118      54.667  11.709  27.722  1.00 63.09           N
ATOM   4822  CA  ASN B 118      54.168  11.309  29.007  1.00 63.09           C
ATOM   4823  CB  ASN B 118      52.647  11.057  29.024  1.00 63.09           C
ATOM   4824  CG  ASN B 118      51.925  12.384  28.812  1.00 63.09           C
ATOM   4825  OD1 ASN B 118      52.548  13.437  28.681  1.00 63.09           O
ATOM   4826  ND2 ASN B 118      50.566  12.335  28.789  1.00 63.09           N
ATOM   4827  C   ASN B 118      54.848  10.047  29.452  1.00 63.09           C
ATOM   4828  O   ASN B 118      55.136   9.155  28.653  1.00 63.09           O
ATOM   4829  N   PHE B 119      55.146   9.965  30.766  1.00 62.79           N
ATOM   4830  CA  PHE B 119      55.676   8.773  31.369  1.00 62.79           C
ATOM   4831  CB  PHE B 119      57.057   8.957  32.021  1.00 62.79           C
ATOM   4832  CG  PHE B 119      57.357   7.695  32.755  1.00 62.79           C
ATOM   4833  CD1 PHE B 119      57.856   6.596  32.095  1.00 62.79           C
ATOM   4834  CD2 PHE B 119      57.132   7.615  34.110  1.00 62.79           C
ATOM   4835  CE1 PHE B 119      58.127   5.434  32.780  1.00 62.79           C
ATOM   4836  CE2 PHE B 119      57.401   6.456  34.799  1.00 62.79           C
ATOM   4837  CZ  PHE B 119      57.899   5.362  34.133  1.00 62.79           C
ATOM   4838  C   PHE B 119      54.725   8.391  32.459  1.00 62.79           C
ATOM   4839  O   PHE B 119      54.329   9.221  33.277  1.00 62.79           O
ATOM   4840  N   ASP B 120      54.319   7.109  32.492  1.00 73.35           N
ATOM   4841  CA  ASP B 120      53.400   6.679  33.503  1.00 73.35           C
ATOM   4842  CB  ASP B 120      52.175   5.911  32.969  1.00 73.35           C
ATOM   4843  CG  ASP B 120      51.208   6.875  32.300  1.00 73.35           C
ATOM   4844  OD1 ASP B 120      51.409   8.111  32.427  1.00 73.35           O
ATOM   4845  OD2 ASP B 120      50.242   6.378  31.662  1.00 73.35           O
ATOM   4846  C   ASP B 120      54.084   5.737  34.432  1.00 73.35           C
ATOM   4847  O   ASP B 120      54.673   4.742  34.009  1.00 73.35           O
ATOM   4848  N   LEU B 121      54.051   6.060  35.740  1.00 70.66           N
ATOM   4849  CA  LEU B 121      54.475   5.086  36.698  1.00 70.66           C
ATOM   4850  CB  LEU B 121      55.188   5.605  37.952  1.00 70.66           C
ATOM   4851  CG  LEU B 121      55.471   4.428  38.905  1.00 70.66           C
ATOM   4852  CD1 LEU B 121      56.231   3.312  38.173  1.00 70.66           C
ATOM   4853  CD2 LEU B 121      56.193   4.877  40.180  1.00 70.66           C
ATOM   4854  C   LEU B 121      53.211   4.445  37.161  1.00 70.66           C
ATOM   4855  O   LEU B 121      52.274   5.132  37.567  1.00 70.66           O
ATOM   4856  N   VAL B 122      53.130   3.106  37.051  1.00 70.23           N
ATOM   4857  CA  VAL B 122      51.959   2.409  37.490  1.00 70.23           C
ATOM   4858  CB  VAL B 122      51.234   1.746  36.349  1.00 70.23           C
ATOM   4859  CG1 VAL B 122      50.011   0.993  36.900  1.00 70.23           C
ATOM   4860  CG2 VAL B 122      50.887   2.813  35.294  1.00 70.23           C
ATOM   4861  C   VAL B 122      52.439   1.307  38.387  1.00 70.23           C
ATOM   4862  O   VAL B 122      52.862   0.255  37.908  1.00 70.23           O
ATOM   4863  N   GLY B 123      52.329   1.500  39.718  1.00 56.99           N
ATOM   4864  CA  GLY B 123      52.828   0.523  40.649  1.00 56.99           C
ATOM   4865  C   GLY B 123      51.802   0.311  41.722  1.00 56.99           C
ATOM   4866  O   GLY B 123      50.703   0.859  41.668  1.00 56.99           O
ATOM   4867  N   ASN B 124      52.144  -0.542  42.713  1.00 63.62           N
ATOM   4868  CA  ASN B 124      51.315  -0.823  43.852  1.00 63.62           C
ATOM   4869  CB  ASN B 124      50.863  -2.290  43.960  1.00 63.62           C
ATOM   4870  CG  ASN B 124      49.678  -2.488  43.031  1.00 63.62           C
ATOM   4871  OD1 ASN B 124      48.749  -1.682  43.022  1.00 63.62           O
ATOM   4872  ND2 ASN B 124      49.700  -3.587  42.229  1.00 63.62           N
ATOM   4873  C   ASN B 124      52.156  -0.546  45.057  1.00 63.62           C
ATOM   4874  O   ASN B 124      53.366  -0.362  44.944  1.00 63.62           O
ATOM   4875  N   ASN B 125      51.520  -0.457  46.242  1.00 53.86           N
ATOM   4876  CA  ASN B 125      52.257  -0.219  47.450  1.00 53.86           C
ATOM   4877  CB  ASN B 125      51.338   0.021  48.663  1.00 53.86           C
ATOM   4878  CG  ASN B 125      50.429  -1.183  48.861  1.00 53.86           C
ATOM   4879  OD1 ASN B 125      49.996  -1.820  47.902  1.00 53.86           O
ATOM   4880  ND2 ASN B 125      50.115  -1.496  50.146  1.00 53.86           N
ATOM   4881  C   ASN B 125      53.162  -1.389  47.742  1.00 53.86           C
ATOM   4882  O   ASN B 125      54.340  -1.195  48.042  1.00 53.86           O
ATOM   4883  N   PHE B 126      52.649  -2.638  47.631  1.00132.73           N
ATOM   4884  CA  PHE B 126      53.419  -3.826  47.929  1.00132.73           C
ATOM   4885  CB  PHE B 126      52.619  -5.140  47.858  1.00132.73           C
ATOM   4886  CG  PHE B 126      51.531  -5.198  48.874  1.00132.73           C
ATOM   4887  CD1 PHE B 126      51.773  -5.717  50.124  1.00132.73           C
ATOM   4888  CD2 PHE B 126      50.265  -4.750  48.570  1.00132.73           C
ATOM   4889  CE1 PHE B 126      50.769  -5.784  51.061  1.00132.73           C
ATOM   4890  CE2 PHE B 126      49.257  -4.815  49.504  1.00132.73           C
ATOM   4891  CZ  PHE B 126      49.509  -5.332  50.752  1.00132.73           C
ATOM   4892  C   PHE B 126      54.478  -4.000  46.868  1.00132.73           C
ATOM   4893  O   PHE B 126      54.239  -3.738  45.693  1.00132.73           O
ATOM   4894  N   PRO B 127      55.643  -4.448  47.283  1.00 99.83           N
ATOM   4895  CA  PRO B 127      56.806  -4.626  46.430  1.00 99.83           C
ATOM   4896  CD  PRO B 127      55.994  -4.413  48.691  1.00 99.83           C
ATOM   4897  CB  PRO B 127      58.009  -4.630  47.380  1.00 99.83           C
ATOM   4898  CG  PRO B 127      57.418  -4.984  48.757  1.00 99.83           C
ATOM   4899  C   PRO B 127      56.822  -5.815  45.504  1.00 99.83           C
ATOM   4900  O   PRO B 127      57.740  -5.895  44.684  1.00 99.83           O
ATOM   4901  N   VAL B 128      55.882  -6.773  45.637  1.00 61.19           N
ATOM   4902  CA  VAL B 128      55.917  -7.925  44.773  1.00 61.19           C
ATOM   4903  CB  VAL B 128      56.437  -9.182  45.408  1.00 61.19           C
ATOM   4904  CG1 VAL B 128      57.915  -8.964  45.759  1.00 61.19           C
ATOM   4905  CG2 VAL B 128      55.548  -9.557  46.605  1.00 61.19           C
ATOM   4906  C   VAL B 128      54.529  -8.222  44.305  1.00 61.19           C
ATOM   4907  O   VAL B 128      53.583  -7.534  44.681  1.00 61.19           O
ATOM   4908  N   PHE B 129      54.379  -9.239  43.425  1.00113.93           N
ATOM   4909  CA  PHE B 129      53.068  -9.575  42.952  1.00113.93           C
ATOM   4910  CB  PHE B 129      52.837  -9.188  41.476  1.00113.93           C
ATOM   4911  CG  PHE B 129      51.374  -8.933  41.291  1.00113.93           C
ATOM   4912  CD1 PHE B 129      50.871  -7.682  41.570  1.00113.93           C
ATOM   4913  CD2 PHE B 129      50.504  -9.908  40.861  1.00113.93           C
ATOM   4914  CE1 PHE B 129      49.533  -7.398  41.420  1.00113.93           C
ATOM   4915  CE2 PHE B 129      49.163  -9.631  40.707  1.00113.93           C
ATOM   4916  CZ  PHE B 129      48.674  -8.376  40.985  1.00113.93           C
ATOM   4917  C   PHE B 129      52.870 -11.064  43.137  1.00113.93           C
ATOM   4918  O   PHE B 129      53.810 -11.798  43.439  1.00113.93           O
ATOM   4919  N   PHE B 130      51.606 -11.523  43.003  1.00 91.41           N
ATOM   4920  CA  PHE B 130      51.142 -12.876  43.194  1.00 91.41           C
ATOM   4921  CB  PHE B 130      49.610 -12.994  43.077  1.00 91.41           C
ATOM   4922  CG  PHE B 130      48.943 -12.170  44.127  1.00 91.41           C
ATOM   4923  CD1 PHE B 130      48.783 -10.813  43.952  1.00 91.41           C
ATOM   4924  CD2 PHE B 130      48.451 -12.752  45.273  1.00 91.41           C
ATOM   4925  CE1 PHE B 130      48.161 -10.049  44.910  1.00 91.41           C
ATOM   4926  CE2 PHE B 130      47.828 -11.992  46.235  1.00 91.41           C
ATOM   4927  CZ  PHE B 130      47.682 -10.638  46.054  1.00 91.41           C
ATOM   4928  C   PHE B 130      51.680 -13.804  42.138  1.00 91.41           C
ATOM   4929  O   PHE B 130      51.884 -14.989  42.403  1.00 91.41           O
ATOM   4930  N   VAL B 131      51.848 -13.313  40.889  1.00132.95           N
ATOM   4931  CA  VAL B 131      52.248 -14.160  39.790  1.00132.95           C
ATOM   4932  CB  VAL B 131      51.116 -14.511  38.865  1.00132.95           C
ATOM   4933  CG1 VAL B 131      50.086 -15.340  39.650  1.00132.95           C
ATOM   4934  CG2 VAL B 131      50.541 -13.217  38.264  1.00132.95           C
ATOM   4935  C   VAL B 131      53.309 -13.469  38.971  1.00132.95           C
ATOM   4936  O   VAL B 131      53.556 -12.273  39.121  1.00132.95           O
ATOM   4937  N   ARG B 132      54.079 -14.287  38.218  1.00236.52           N
ATOM   4938  CA  ARG B 132      55.180 -13.910  37.362  1.00236.52           C
ATOM   4939  CB  ARG B 132      56.373 -14.884  37.454  1.00236.52           C
ATOM   4940  CG  ARG B 132      56.073 -16.341  37.084  1.00236.52           C
ATOM   4941  CD  ARG B 132      57.312 -17.242  37.158  1.00236.52           C
ATOM   4942  NE  ARG B 132      57.819 -17.188  38.557  1.00236.52           N
ATOM   4943  CZ  ARG B 132      57.416 -18.098  39.492  1.00236.52           C
ATOM   4944  NH1 ARG B 132      56.644 -19.167  39.139  1.00236.52           N
ATOM   4945  NH2 ARG B 132      57.799 -17.928  40.790  1.00236.52           N
ATOM   4946  C   ARG B 132      54.910 -13.670  35.902  1.00236.52           C
ATOM   4947  O   ARG B 132      55.807 -13.194  35.206  1.00236.52           O
ATOM   4948  N   ASP B 133      53.768 -14.135  35.358  1.00 89.95           N
ATOM   4949  CA  ASP B 133      53.548 -14.072  33.934  1.00 89.95           C
ATOM   4950  CB  ASP B 133      53.652 -15.476  33.300  1.00 89.95           C
ATOM   4951  CG  ASP B 133      53.691 -15.404  31.779  1.00 89.95           C
ATOM   4952  OD1 ASP B 133      52.794 -14.759  31.175  1.00 89.95           O
ATOM   4953  OD2 ASP B 133      54.628 -16.007  31.196  1.00 89.95           O
ATOM   4954  C   ASP B 133      52.154 -13.557  33.695  1.00 89.95           C
ATOM   4955  O   ASP B 133      51.223 -13.896  34.420  1.00 89.95           O
ATOM   4956  N   GLY B 134      51.976 -12.749  32.631  1.00 51.21           N
ATOM   4957  CA  GLY B 134      50.721 -12.142  32.265  1.00 51.21           C
ATOM   4958  C   GLY B 134      49.679 -13.191  31.980  1.00 51.21           C
ATOM   4959  O   GLY B 134      48.488 -12.944  32.158  1.00 51.21           O
ATOM   4960  N   MET B 135      50.086 -14.396  31.530  1.00195.12           N
ATOM   4961  CA  MET B 135      49.115 -15.385  31.130  1.00195.12           C
ATOM   4962  CB  MET B 135      49.666 -16.756  30.715  1.00195.12           C
ATOM   4963  CG  MET B 135      50.298 -16.795  29.331  1.00195.12           C
ATOM   4964  SD  MET B 135      49.941 -18.344  28.466  1.00195.12           S
ATOM   4965  CE  MET B 135      48.267 -17.754  28.089  1.00195.12           C
ATOM   4966  C   MET B 135      48.166 -15.686  32.252  1.00195.12           C
ATOM   4967  O   MET B 135      47.022 -16.056  32.004  1.00195.12           O
ATOM   4968  N   LYS B 136      48.645 -15.646  33.501  1.00185.30           N
ATOM   4969  CA  LYS B 136      47.898 -15.965  34.690  1.00185.30           C
ATOM   4970  CB  LYS B 136      48.826 -16.374  35.844  1.00185.30           C
ATOM   4971  CG  LYS B 136      49.486 -17.735  35.606  1.00185.30           C
ATOM   4972  CD  LYS B 136      48.505 -18.912  35.620  1.00185.30           C
ATOM   4973  CE  LYS B 136      47.768 -19.180  34.308  1.00185.30           C
ATOM   4974  NZ  LYS B 136      46.891 -20.364  34.456  1.00185.30           N
ATOM   4975  C   LYS B 136      46.939 -14.904  35.192  1.00185.30           C
ATOM   4976  O   LYS B 136      46.086 -15.214  36.022  1.00185.30           O
ATOM   4977  N   PHE B 137      47.067 -13.630  34.766  1.00 91.62           N
ATOM   4978  CA  PHE B 137      46.373 -12.523  35.392  1.00 91.62           C
ATOM   4979  CB  PHE B 137      46.761 -11.156  34.793  1.00 91.62           C
ATOM   4980  CG  PHE B 137      46.191 -10.093  35.676  1.00 91.62           C
ATOM   4981  CD1 PHE B 137      46.772  -9.815  36.893  1.00 91.62           C
ATOM   4982  CD2 PHE B 137      45.090  -9.364  35.292  1.00 91.62           C
ATOM   4983  CE1 PHE B 137      46.259  -8.840  37.716  1.00 91.62           C
ATOM   4984  CE2 PHE B 137      44.571  -8.386  36.110  1.00 91.62           C
ATOM   4985  CZ  PHE B 137      45.155  -8.122  37.325  1.00 91.62           C
ATOM   4986  C   PHE B 137      44.870 -12.625  35.371  1.00 91.62           C
ATOM   4987  O   PHE B 137      44.250 -12.381  36.406  1.00 91.62           O
ATOM   4988  N   PRO B 138      44.223 -12.941  34.280  1.00 80.15           N
ATOM   4989  CA  PRO B 138      42.788 -13.002  34.292  1.00 80.15           C
ATOM   4990  CD  PRO B 138      44.760 -12.699  32.952  1.00 80.15           C
ATOM   4991  CB  PRO B 138      42.384 -13.243  32.841  1.00 80.15           C
ATOM   4992  CG  PRO B 138      43.528 -12.594  32.037  1.00 80.15           C
ATOM   4993  C   PRO B 138      42.312 -14.037  35.257  1.00 80.15           C
ATOM   4994  O   PRO B 138      41.314 -13.807  35.937  1.00 80.15           O
ATOM   4995  N   ASP B 139      43.022 -15.177  35.334  1.00 69.83           N
ATOM   4996  CA  ASP B 139      42.653 -16.245  36.214  1.00 69.83           C
ATOM   4997  CB  ASP B 139      43.585 -17.460  36.079  1.00 69.83           C
ATOM   4998  CG  ASP B 139      43.388 -18.052  34.691  1.00 69.83           C
ATOM   4999  OD1 ASP B 139      42.212 -18.176  34.256  1.00 69.83           O
ATOM   5000  OD2 ASP B 139      44.415 -18.392  34.048  1.00 69.83           O
ATOM   5001  C   ASP B 139      42.765 -15.768  37.625  1.00 69.83           C
ATOM   5002  O   ASP B 139      41.857 -15.966  38.431  1.00 69.83           O
ATOM   5003  N   MET B 140      43.885 -15.096  37.958  1.00 63.11           N
ATOM   5004  CA  MET B 140      44.086 -14.665  39.309  1.00 63.11           C
ATOM   5005  CB  MET B 140      45.398 -13.889  39.496  1.00 63.11           C
ATOM   5006  CG  MET B 140      45.623 -13.437  40.939  1.00 63.11           C
ATOM   5007  SD  MET B 140      46.942 -12.205  41.141  1.00 63.11           S
ATOM   5008  CE  MET B 140      45.951 -10.837  40.476  1.00 63.11           C
ATOM   5009  C   MET B 140      42.979 -13.724  39.670  1.00 63.11           C
ATOM   5010  O   MET B 140      42.338 -13.887  40.706  1.00 63.11           O
ATOM   5011  N   VAL B 141      42.690 -12.739  38.796  1.00120.91           N
ATOM   5012  CA  VAL B 141      41.691 -11.750  39.094  1.00120.91           C
ATOM   5013  CB  VAL B 141      41.639 -10.612  38.107  1.00120.91           C
ATOM   5014  CG1 VAL B 141      42.889  -9.747  38.306  1.00120.91           C
ATOM   5015  CG2 VAL B 141      41.549 -11.174  36.681  1.00120.91           C
ATOM   5016  C   VAL B 141      40.339 -12.384  39.213  1.00120.91           C
ATOM   5017  O   VAL B 141      39.541 -11.984  40.059  1.00120.91           O
ATOM   5018  N   HIS B 142      40.036 -13.388  38.370  1.00 58.10           N
ATOM   5019  CA  HIS B 142      38.758 -14.041  38.432  1.00 58.10           C
ATOM   5020  ND1 HIS B 142      38.370 -15.044  34.759  1.00 58.10           N
ATOM   5021  CG  HIS B 142      38.307 -14.404  35.977  1.00 58.10           C
ATOM   5022  CB  HIS B 142      38.544 -15.066  37.303  1.00 58.10           C
ATOM   5023  NE2 HIS B 142      37.833 -12.930  34.335  1.00 58.10           N
ATOM   5024  CD2 HIS B 142      37.978 -13.112  35.698  1.00 58.10           C
ATOM   5025  CE1 HIS B 142      38.078 -14.118  33.812  1.00 58.10           C
ATOM   5026  C   HIS B 142      38.596 -14.735  39.751  1.00 58.10           C
ATOM   5027  O   HIS B 142      37.493 -14.795  40.289  1.00 58.10           O
ATOM   5028  N   ALA B 143      39.681 -15.322  40.286  1.00 45.16           N
ATOM   5029  CA  ALA B 143      39.635 -16.017  41.547  1.00 45.16           C
ATOM   5030  CB  ALA B 143      40.956 -16.733  41.874  1.00 45.16           C
ATOM   5031  C   ALA B 143      39.360 -15.063  42.680  1.00 45.16           C
ATOM   5032  O   ALA B 143      38.630 -15.401  43.612  1.00 45.16           O
ATOM   5033  N   LEU B 144      40.005 -13.876  42.658  1.00115.10           N
ATOM   5034  CA  LEU B 144      39.858 -12.861  43.674  1.00115.10           C
ATOM   5035  CB  LEU B 144      40.948 -11.771  43.639  1.00115.10           C
ATOM   5036  CG  LEU B 144      42.329 -12.206  44.168  1.00115.10           C
ATOM   5037  CD1 LEU B 144      42.987 -13.281  43.296  1.00115.10           C
ATOM   5038  CD2 LEU B 144      43.238 -10.986  44.369  1.00115.10           C
ATOM   5039  C   LEU B 144      38.537 -12.151  43.602  1.00115.10           C
ATOM   5040  O   LEU B 144      37.975 -11.768  44.628  1.00115.10           O
ATOM   5041  N   LYS B 145      38.017 -11.921  42.382  1.00 99.94           N
ATOM   5042  CA  LYS B 145      36.813 -11.154  42.229  1.00 99.94           C
ATOM   5043  CB  LYS B 145      36.570 -10.733  40.768  1.00 99.94           C
ATOM   5044  CG  LYS B 145      37.679  -9.776  40.305  1.00 99.94           C
ATOM   5045  CD  LYS B 145      37.775  -9.554  38.797  1.00 99.94           C
ATOM   5046  CE  LYS B 145      38.939  -8.642  38.393  1.00 99.94           C
ATOM   5047  NZ  LYS B 145      38.686  -7.255  38.845  1.00 99.94           N
ATOM   5048  C   LYS B 145      35.644 -11.889  42.817  1.00 99.94           C
ATOM   5049  O   LYS B 145      35.719 -13.080  43.114  1.00 99.94           O
ATOM   5050  N   PRO B 146      34.556 -11.188  43.021  1.00 83.58           N
ATOM   5051  CA  PRO B 146      33.409 -11.778  43.658  1.00 83.58           C
ATOM   5052  CD  PRO B 146      34.568  -9.738  43.128  1.00 83.58           C
[truncated: 845,149 more chars]
