# Supplementary material for: Molecular Mechanism of Response and Adaptation of Antioxidant Enzyme System to Salt Stress in Leaves of Gymnocarpos przewalskii
Source: Plants (Basel). 2023 Sep 25;12(19):3370. doi: 10.3390/plants12193370 (PMC10574792; doi:10.3390/plants12193370)
Supplement: Supplementary file 1 [file plants-12-03370-s001.zip › H2O2.sdf]

784
  -OEChem-02212307262D

  4  3  0     0  0  0  0  0  0999 V2000
    2.5369   -0.2500    0.0000 O   0  0  0  0  0  0  0  0  0  0  0  0
    3.4030    0.2500    0.0000 O   0  0  0  0  0  0  0  0  0  0  0  0
    2.0000    0.0600    0.0000 H   0  0  0  0  0  0  0  0  0  0  0  0
    3.9399   -0.0600    0.0000 H   0  0  0  0  0  0  0  0  0  0  0  0
  1  2  1  0  0  0  0
  1  3  1  0  0  0  0
  2  4  1  0  0  0  0
M  END
> <PUBCHEM_COMPOUND_CID>
784

> <PUBCHEM_COMPOUND_CANONICALIZED>
1

> <PUBCHEM_CACTVS_COMPLEXITY>
0

> <PUBCHEM_CACTVS_HBOND_ACCEPTOR>
2

> <PUBCHEM_CACTVS_HBOND_DONOR>
2

> <PUBCHEM_CACTVS_ROTATABLE_BOND>
0

> <PUBCHEM_CACTVS_SUBSKEYS>
AAADcQAAMAAAAAAAAAAAAAAAAAAAAAAAAAAAAAAAAAAAAAAAAAAAAAAADAAAAAAAAAAAAAAAAAAAAAAAAAAAAAAAAAAAAAAAAAAAAAAAAAAAAAAAAAAAAAAAAAAAAAAAAAAAAAAAAAAAAAAAAAAAAAAAAA==

> <PUBCHEM_IUPAC_OPENEYE_NAME>
hydrogen peroxide

> <PUBCHEM_IUPAC_CAS_NAME>
hydrogen peroxide

> <PUBCHEM_IUPAC_NAME_MARKUP>
hydrogen peroxide

> <PUBCHEM_IUPAC_NAME>
hydrogen peroxide

> <PUBCHEM_IUPAC_SYSTEMATIC_NAME>
hydrogen peroxide

> <PUBCHEM_IUPAC_TRADITIONAL_NAME>
hydrogen peroxide

> <PUBCHEM_IUPAC_INCHI>
InChI=1S/H2O2/c1-2/h1-2H

> <PUBCHEM_IUPAC_INCHIKEY>
MHAJPDPJQMAIIY-UHFFFAOYSA-N

> <PUBCHEM_XLOGP3_AA>
-0.9

> <PUBCHEM_EXACT_MASS>
34.005479302

> <PUBCHEM_MOLECULAR_FORMULA>
H2O2

> <PUBCHEM_MOLECULAR_WEIGHT>
34.015

> <PUBCHEM_OPENEYE_CAN_SMILES>
OO

> <PUBCHEM_OPENEYE_ISO_SMILES>
OO

> <PUBCHEM_CACTVS_TPSA>
40.5

> <PUBCHEM_MONOISOTOPIC_WEIGHT>
34.005479302

> <PUBCHEM_TOTAL_CHARGE>
0

> <PUBCHEM_HEAVY_ATOM_COUNT>
2

> <PUBCHEM_ATOM_DEF_STEREO_COUNT>
0

> <PUBCHEM_ATOM_UDEF_STEREO_COUNT>
0

> <PUBCHEM_BOND_DEF_STEREO_COUNT>
0

> <PUBCHEM_BOND_UDEF_STEREO_COUNT>
0

> <PUBCHEM_ISOTOPIC_ATOM_COUNT>
0

> <PUBCHEM_COMPONENT_COUNT>
1

> <PUBCHEM_CACTVS_TAUTO_COUNT>
1

> <PUBCHEM_COORDINATE_TYPE>
1
5
255

$$$$
