# Supplementary material for: Molecular Mechanism of Response and Adaptation of Antioxidant Enzyme System to Salt Stress in Leaves of Gymnocarpos przewalskii
Source: Plants (Basel). 2023 Sep 25;12(19):3370. doi: 10.3390/plants12193370 (PMC10574792; doi:10.3390/plants12193370)
Supplement: Supplementary file 1 [file plants-12-03370-s001.zip › Table S1 qRT-PCR primer information and reaction system.xlsx]

## Sheet: reaction system
2×Universal Blue SYBR Green qPCR Master Mix	7.5μl
2.5μMGene primer (sense primer and antisense primer)	1.5μl
cDNA	2.0μl
Water Nuclease-Free	4.0μl

## Sheet: Primer information
Gene name	Sense primer	Antisense primer
FSD1	CTGAAAAGAGGCGAGTAGGAAGAG	TGCATTGTTGAAGGATGGAAGTAC
CSD1	TGGGTAGGGCTGTTGTTGTCC	CAGATAGAAGTCTGGACGAAAAGCT
APX6	TTACAGAGTACGCCAATGACCAA	GAACTGCACGTGATCATGAAGCT
APX10a	CAGTACATACTTAGTGCAACATGGC	ACTGCTTGTTGTGGGAGAGTAGATT
CAT1	TTCTCTCTCCTCCATGGATCCTT	CCAAATGGTAGTCCTCCAAAAGAAT
CAT2	CAAACCCAACCCGAAATCTC	AGCGGCCTCTTCTTCCAAC
18S	TTCATTCGGGATAGCTCATTCGT	GAGCCATTCGCAGTTTCTCAGTC
