# Supplementary material for: Molecular Mechanism of Response and Adaptation of Antioxidant Enzyme System to Salt Stress in Leaves of Gymnocarpos przewalskii
Source: Plants (Basel). 2023 Sep 25;12(19):3370. doi: 10.3390/plants12193370 (PMC10574792; doi:10.3390/plants12193370)
Supplement: Supplementary file 1 [file plants-12-03370-s001.zip › Table S2 Gene identification results.xlsx]

## Sheet: SOD
Species	Family	Gene	Genomic location	mRNA Accesion number
Arabidopsis thaliana	Cruciferae	FSD1	NC_003075.7：12886501-12884649	NM_179109.3
		FSD2	NC_003076.8：7850624-7852241	NM_122237.4
		FSD3	NC_003076.8：20775635-20773357	NM_001344920.1
		FSD3a	NC_003075.7：271879-271487	NM_001160723.1
		CSD1	NC_003070.9：2827700-2828807	NM_100757.4
		CSD2	NC_003071.7：12014548-12016119	NM_128379.4
		CSD3	NC_003076.8：5987221-5988706	NM_121815.3
		MSD1	NC_003074.8：3418015-3419581	NM_111929.4
		MSD2	NC_003074.8：20895625-20894155	NM_115493.4
Oryza sativa	Gramineae	SOD1	NC_029258.1: 6271956..6275398	XM_015775916.2
		SOD2	NC_029258.1:13181327..13184512	NM_001402155.1
		SOD3	NC_029258.1 :32329063..32335821	*
		SOD4	NC_029259.1:28874349..28878865	NM_001402411.1
		SOD5	NC_029260.1 :15046735..15051400	NM_001402510.1
		SOD6	NC_029261.1 :864354..866968	NM_001420999.1
		SOD7	NC_029261.1 :2256832..2262156	NM_001402741.1
		SOD8	NC_029262.1:28075581..28077669	NM_001403234.1
		SOD9	NC_029263.1 :28132342..28135506	NM_001403705.1
Gymnocarpos przewalskii	Caryophyllaceae	FSD1	*	*
		FSD2	*	*
		CSD4	*	*
		CSD1	*	*
		CSD3	*	*
		MSD1	*	*
		MSD2	*	*
Heliosperma pusillum	Caryophyllaceae	FSD1	JAIUZE010018124.1：11847-15799	*
		FSD2	JAIUZE010000002.1：140516-136928	*
		CSD4	JAIUZE010067092.1:3384-5050	*
		CSD1	JAIUZE010073259.1:285813-288035	*
		CSD1a	JAIUZE010070098.1:178071-179888	*
		MSD1	JAIUZE010008127.1:79107-76112	*
Silene uniflora	Caryophyllaceae	FSD1	JAGPOY010018870.1:5491-2120	*
		FSD2	JAGPOY010002330.1:7452-11037	*
		CSD4	JAGPOY010003172.1:23432-25100	*
		CSD1	JAGPOY010001333.1:40498-38310	*
		MSD1	JAGPOY010014232.1:7069-2430	*
		MSD2	JAGPOY010011731.1:4295-262	*
Beta vulgaris	Chenopodiaceae	FSD1	NC_025816.2:6234788-6228677	*
		FSD2	NC_025818.2:40177518-40172416	*
		CSD4	NC_025816.2:4914930-4919486	*
		CSD1	NC_025815.2:15147045-15150139	XM_048643263.1
		CSD2	NC_025820.2:8642105-8643606	XM_010690943.3
		CSD3	NW_017567370.1:79949-75243	XM_048641553.1
		MSD1	NC_025813.2:38245103-38248668	XM_010672327.3
Spinacia oleracea	Chenopodiaceae	FSD1	NW_018931542.1:472076-476008	*
		FSD2	NW_018931921.1:9755-14589	*
		CSD4	NW_018931441.1:557804-561552	*
		CSD1	NW_018933314.1:21108-24616	XM_021980495.1
		CSD2	NW_018931532.1:503914-502172	XM_021992599.1
		CSD3	NW_018931535.1:211206-208540	XM_021992686.1
		MSD1	NW_018932804.1:356909-364539	XM_022007118.1
Chenopodium pallidicaule	Chenopodiaceae	FSD1	MATR01001300.1：30440-27605	*
		FSD2	MATR01000265.1：180148-176382	*
		CSD1	MATR01000264.1：257344-260369	*
		CSD4	MATR01000261.1：320327-316450	*
		CSD2	MATR01000024.1：784224-782104	*
		CSD3	MATR01001549.1：14852-21045	*
		MSD1	MATR01000148.1：624885-628670	*
* indicates a new gene identified in this paper.

## Sheet: APX
Species	Family	Gene	Genomic location	mRNA Accesion number
Arabidopsis thaliana	Cruciferae	APX1	NC_003070.9:2438005…2439338	NM_001123772.2
		APX3	NC_003075.7:16667541…16665007	NM_119666.4
		APX7	NC_003075.7:5314999…5316835	NM_116908.3
		APX2	NC_003074.8:2956301…2957969	NM_111798.4
		APX6	NC_003075.7:15602777…15605234	NM_119384.4
		APX8	NC_003070.9:29117688…29120046	NM_106398.3
		APX5	NC_003075.7:17028651…17030205	NM_119763.3
		APX4	NC_003075.7:5779338…5777502	NM_001340607.1
Oryza sativa	Gramineae	APX2	NC_029262.1 :29584030..29586347	NM_001403284.1
		APX8	NC_029257.1:20868300..20872075	NM_001401874.1
		APX7	NC_029259.1:21622952..21627259	NM_001402369.1
		APX4	NC_029263.1:27555336..27559365	NM_001403688.1
		APX5	NC_029267.1:3960506..3964017	XM_015762991.2
		APX1	NC_029258.1:9843314..9846675	NM_001402136.1
		APX6	NC_029267.1:3955958..3959860	XM_015762689.2
		APX3	NC_029259.1:8239237..8241896	NM_001419109.1
Beta vulgaris	Chenopodiaceae	APX9	NC_025817.2:3929319…3931553	XM_010681603.3
		APX10	NC_025817.2:3917614…3927533	XM_010681600.3
		APX2	NW_017567472.1:586711…592498	XM_010698070.3
		APX6	NC_025813.2:7448653...7454120	XM_010697898.2
		APX1a	NC_025820.2:41148247...41150300	XM_010692955.3
		APX1	NC_025820.2:13210460…13208362	XM_010691118.3
		APX7	NC_025812.2:8411044…8397290	XM_010676647.3
		APX3	NC_025820.2:33866782…33874075	XM_010692076.3
		APX10b	NC_025817.2:3853492…3859976	XM_048646137.1
		APX10a	NC_025817.2:3907268…3914453	XM_048646138.1
		APX10c	NC_025817.2:3832775…3842021	XM_019250091.2
		APX10d	NC_025817.2:3869446…3878684	*
Heliosperma pusillum	Caryophyllaceae	APX6	JAIUZE010066165.1:38080…43942	*
		APX7	JAIUZE010000780.1:15841…21050	*
		APX2	JAIUZE010046500.1:26730…29882	*
		APX1	JAIUZE010069975.1:67639…65598	*
		APX1a	JAIUZE010011330.1:23253…25790	*
		APX9	JAIUZE010001448.1:16785…19048	*
		APX3a	JAIUZE010011042.1:2462…8040	*
		APX3	JAIUZE010002064.1:86458…92020	*
		APX10b	JAIUZE010066489.1:16189…18712	*
		APX10	JAIUZE010070254.1:82373…94905	*
		APX10a	JAIUZE010066489.1:10070…12471	*
Spinacia oleracea	Chenopodiaceae	APX9a	NW_018935163.1:15437…13970	XM_022011344.1
		APX10	NW_018932823.1:403999…406219	XM_022007832.1
		APX10c	NW_018932823.1:409240…411435	XM_022007817.1
		APX7	NW_018931389.1:1443992…1436669	XM_022002395.1
		APX10a	NW_018931664.1:481368…478640	XM_021995419.1
		APX9	NW_018931664.1:341600…339966	XM_021995417.1
		APX1	NW_018931639.1:8525…10511	XM_021995024.1
		APX6	NW_018931544.1:4183…10174	XM_021993013.1
		APX1a	NW_018931508.1:775396…776222	XM_021991571.1
		APX9b	NW_018933065.1:95549...97066	XM_021983935.1
		APX10b	NW_018934240.1:40585…33898	XM_021982989.1
Chenopodium pallidicaule	Chenopodiaceae	APX10a	MATR01000009.1:324452...321254	*
		APX10b	MATR01000009.1:301972...305599	*
		APX10c	MATR01000132.1:564343...571551	*
		APX10d	MATR01000009.1:321254...324422	*
		APX1	MATR01000159.1:480025...483546	*
		APX1A	MATR01000159.1:482751...481793	*
		APX6	MATR01000190.1:301964...307623	*
		APX3	MATR01000013.1:799272...806413	*
		APX9	MATR01000009.1:301398...299421	*
		APX10e	MATR01000009.1:313546...316691	*
Silene uniflora	Caryophyllaceae	APX6	JAGPOY010001772.1:7590...13846	*
		APX1	JAGPOY010028082.1:1248...3385	*
		APX1a	JAGPOY010010275.1:2479...1115	*
		APX9a	JAGPOY010013841.1:3973...5702	*
		APX9	JAGPOY010002888.1:2907…0	*
		APX9b	JAGPOY010002888.1:5814…4008	*
		APX3	JAGPOY010000712.1:6150...11631	*
		APX10b	JAGPOY010001039.1:16623…14951	*
		APX10a	JAGPOY010018218.1:4946...6946	*
		APX7	JAGPOY010004042.1:15289...20830	*
Gymnocarpos przewalskii	Caryophyllaceae	APX6	*	*
		APX1	*	*
		APX7	*	*
		APX3	*	*
		APX10a	*	*
		APX10	*	*
* indicates a new gene identified in this paper.

## Sheet: CAT
Species	Family	Gene	Genomic location	mRNA Accesion number
Arabidopsis thaliana	Cruciferae	CAT2	NC_003075.7:16702942…16700937	NM_119675.4
		CAT3	NC_003070.9:7144205…7146193	NM_101913.4
		CAT1	NC_003070.9:7147412…7149609	NM_101914.4
Oryza sativa	Gramineae	CATA	NC_029257.1 :825039..827695	NM_001401748.1
		CATB	NC_029261.1:30944188..30948224	NM_001402963.1
		CAT1	NC_029258.1 :1787663..1790952	XM_015774263.2
Beta vulgaris	Chenopodiaceae	CAT2	NW_017567329.1:682145...688190	XM_010694242.3
		CAT1	NW_017567329.1:899445...894386	XM_010694244.3
Heliosperma pusillum	Caryophyllaceae	CAT1	JAIUZE010005288.1:8459...3362	*
		CAT1a	JAIUZE010000720.1:171045…176101	*
		CAT1b	JAIUZE010002886.1:1337…3316	*
		CAT2	JAIUZE010002886.1:32046...35143	*
		CAT2a	JAIUZE010000720.1:195414…198011	*
Spinacia oleracea	Chenopodiaceae	CAT1	NW_018931458.1:75263…81011	XM_021989539.1
		CAT2	NW_018931643.1:8372…3429	XM_021995073.1
Chenopodium pallidicaule	Chenopodiaceae	CAT1	MATR01000308.1:41516...37092	*
		CAT2	MATR01000428.1:162000...158780	*
Silene uniflora	Caryophyllaceae	CAT1	JAGPOY010016359.1:1630...6411	*
		CAT2	JAGPOY010014083.1:2687....5788	*
Gymnocarpos przewalskii	Caryophyllaceae	CAT1	*	*
		CAT2	*	*
* indicates a new gene identified in this paper.
