# Supplementary material for: Molecular Mechanism of Response and Adaptation of Antioxidant Enzyme System to Salt Stress in Leaves of Gymnocarpos przewalskii
Source: Plants (Basel). 2023 Sep 25;12(19):3370. doi: 10.3390/plants12193370 (PMC10574792; doi:10.3390/plants12193370)
Supplement: Supplementary file 1 [file plants-12-03370-s001.zip › Table S3 Physical and chemical properties of protein.xlsx]

## Sheet: Sheet1
Species/polypetide	Number of amino acid	Molecular weight	Isoelectric point	Average hydrophilicity	Instability index	Subunit cell localization
CSD1	152	15109.7	5.47	-0.1	20.91	chloroplast
CSD3	157	15971	7.19	-0.13	17.39	chloroplast
CSD4	306	32884.7	6.06	-0.1	36.54	chloroplast
FSD1	269	30257.1	5.82	-0.35	37.58	chloroplast
FSD2	255	29251.6	8.94	-0.28	45.02	chloroplast
MSD1	230	25758.3	6.75	-0.4	44.83	chloroplast
MSD2	228	25614.2	6.75	-0.37	42.5	chloroplast
APX6	326	36182.2	6.25	-0.203	35.88	cytoplasm
APX1	250	27488.1	5.42	-0.403	71.92	peroxisome
APX7	406	44289.2	8.69	-0.386	40.42	chloroplast、mitochondria
APX3	286	31306.7	6.61	-0.325	41.89	peroxisome
APX10a	301	33794.1	9.08	-0.697	40.41	peroxisome
APX10	250	27654.3	7.79	-0.471	43.46	peroxisome
CAT1	492	56697.1	6.92	-0.542	31.89	peroxisome
CAT2	317	36386.2	6.06	-0.46	35.16	peroxisome
