# Supplementary material for: Molecular Mechanism of Response and Adaptation of Antioxidant Enzyme System to Salt Stress in Leaves of Gymnocarpos przewalskii
Source: Plants (Basel). 2023 Sep 25;12(19):3370. doi: 10.3390/plants12193370 (PMC10574792; doi:10.3390/plants12193370)
Supplement: Supplementary file 1 [file plants-12-03370-s001.zip › Table S4 Correlation analysis between gene expression and enzyme activity.xlsx]

## Sheet: Sheet1
Gene name	SOD enzymatic activity	Gene name	APX enzymatic activity	Gene name	CAT enzymatic activity
FSD1	0.56	APX6	0.719	CAT1	0.989
FSD3	0.975	APX1	0.631	CAT2	0.858
CSD1	0.892	APX7	0.582	*	*
CSD3	0.373	APX3	0.204	*	*
CSD4	-0.102	APX10a	0.198	*	*
MSD1	0.928	APX10	0.743	*	*
MSD2	0.875	*	*	*	*
Note: Numbers indicate Pearson correlation coefficients
