# Supplementary material for: Molecular Mechanism of Response and Adaptation of Antioxidant Enzyme System to Salt Stress in Leaves of Gymnocarpos przewalskii
Source: Plants (Basel). 2023 Sep 25;12(19):3370. doi: 10.3390/plants12193370 (PMC10574792; doi:10.3390/plants12193370)
Supplement: Supplementary file 1 [file plants-12-03370-s001.zip › Table S5 Molecular evolutionary analysis.xlsx]

## Sheet: Site model
Model	Parameter estimates	NP	lnL	df	χ2	Test	P
M0 ( one-ratio)	ω0
APX1	0.10723	11	-2231.91
APX3	0.07366	11	-2635.07
APX6	0.25654	11	-3560.01
APX7	0.25654	9	-2146.43
APX10	0.1527	9	-2687.59
APX10a	1.50767	11	-2485.98
CSD1	0.10446	19	-2095.71
CSD3	0.14554	15	-1860.56
CSD4	0.14944	11	-2782.33
FSD1	0.08086	13	-1264.71
FSD3	0.1564	9	-2203.48
MSD1	0.10691	15	-2237.33
MSD2	0.10691	15	-2237.33
CAT1	0.0598	9	-3858.57
CAT2	0.05	13	-4230.6
M3 discrete	ω0 ,ω1 ,ω2 ,f0 ,f1 ,f2			M3 vs M0
APX1	0.01,0.31,3.44,0.71,0.27,0.01	15	-2203.58	4	56.6672	APX1	1.45293e-11
APX3	0.02,0.24,0.24,0.70,0.04,0.25	15	-2607.51	4	55.1101	APX3	3.08097e-11
APX6	0.00,0.30,0.89,0.39,0.41,0.19	15	-3518.31	4	83.3989	APX6	3.31579e-17
APX7	0.00,0.88,6.13,0.44,0.55,0.01	13	-2128.83	4	35.2132	APX7	4.1997e-07
APX10	0.03,0.31,2.48,0.54,0.44,0.02	13	-2652.95	4	69.2899	APX10	3.20545e-14
APX10a	0.27,2.15,5.45,0.260.68,0.05	15	-2467.04	4	37.875	APX10a	1.18911e-07
CSD1	0.01,0.01,0.53,0.23,0.55,0.22	23	-2032.98	4	125.462	CSD1	3.63563e-26
CSD3	0.04,0.49,1.50,0.81,0.12,0.07	19	-1813.52	4	94.0983	CSD3	1.77213e-19
CSD4	0.00,0.09,0.66,0.28,0.53,0.20	15	-2757.94	4	48.7817	CSD4	6.48446e-10
FSD1	0.00,0.28,0.28,0.67,0.24,0.09	17	-1254.02	4	21.366	FSD1	0.000267904
FSD3	0.05,0.05,0.72,0.38,0.41,0.21	13	-2178.15	4	50.6581	FSD3	2.63124e-10
MSD1	0.00,0.08,0.78,0.39,0.50,0.12	19	-2206.28	4	62.1171	MSD1	1.04084e-12
MSD2	0.00,0.08,0.78,0.39,0.50,0.12	19	-2206.28	4	62.1171	MSD2	1.04084e-12
CAT1	0.00,0.00,0.28,0.47,0.26,0.27	13	-3837.16	4	42.8135	CAT1	1.13123e-08
CAT2	0.00,0.10,0.47,0.54,0.42,0.03	17	-4196.22	4	68.7657	CAT2	4.13539e-14
M1	w0,w1,f0,f1
APX1	0.05,1.00,0.92,0.08	12	-2206.61
APX3	0.05,1.00,0.92,0.08	12	-2622.37
APX6	0.09,1.00,0.72,0.28	12	-3521.94
APX7	0.03,1.00,0.50,0.50	10	-2129.45
APX10	0.10,1.00,0.87,0.13	10	-2659.34
APX10a	0.02,1.00,0.12,0.88	12	-2480.83
CSD1	0.02,1.00,0.82,0.18	20	-2041.89
CSD3	0.05,1.00,0.85,0.15	16	-1814.03
CSD4	0.07,1.00,0.86,0.14	12	-2759.57
FSD1	0.06,1.00,0.95,0.05	14	-1264.04
FSD3	0.07,1.00,0.84,0.16	10	-2178.96
MSD1	0.04,1.00,0.90,0.10	16	-2207.1
MSD2	0.04,1.00,0.90,0.10	16	-2207.1
CAT1	0.04,1.00,0.94,0.06	10	-3846.28
CAT2	0.04,1.00,0.97,0.03	14	-4230.6
M2	w0,w1,w2,f0,f1,f2			M1 vs M2
APX1	0.05,1.00,999.00,0.92,0.08,0.00	14	-2202.36	2	8.50757	APX1	0.0142104
APX3	0.05,1.00,1.00,0.92,0.02,0.05	14	-2622.37	2	0	APX3	1
APX6	0.09,1.00,1.00,0.72,0.20,0.08	14	-3521.94	2	0	APX6	1
APX7	0.03,1.00,7.14,0.49,0.50,0.01	12	-2129	2	0.90364	APX7	0.636469
APX10	0.10,1.00,191.18,0.875,0.13,0.00	12	-2659.34	2	4e-06	APX10	0.999998
APX10a	0.25,1.00,2.57,0.23,0.16,0.61	14	-2477.32	2	7.02384	APX10a	0.0298396
CSD1	0.02,1.00,132.25,0.82,0.18,0.00	22	-2041.89	2	0.000186	CSD1	0.999907
CSD3	0.05,1.00,113.09,0.85,0.15,0.00	18	-1814.03	2	0	CSD3	1
CSD4	0.07,1.00,1.00,0.86,0.10,0.04	14	-2759.57	2	0	CSD4	1
FSD1	0.06,1.00,56.33,0.95,0.05,0.00	16	-1264.04	2	0	FSD1	1
FSD3	0.07,1.00,1.00,0.84,0.10,0.06	12	-2178.96	2	0	FSD3	1
MSD1	0.04,1.00,1.00,0.90,0.070.03	18	-2207.1	2	0	MSD1	1
MSD2	0.04,1.00,1.00,0.90,0.07,0.03	18	-2207.1	2	0	MSD2	1
CAT1	0.04,1.00,1.00,0.94,0.03,0.03	12	-3846.28	2	0	CAT1	1
CAT2	0.04,1.00,255.45,0.97,0.02,0.00	16	-4230.6	2	4.6e-05	CAT2	0.999977
M7 beta	p,q
APX1	0.15,1.03	12	-2207.39
APX3	0.36,3.71	12	-2607.87
APX6	0.31,0.71	12	-3518.45
APX7	0.05,0.05	10	-2129.44
APX10	0.45,1.93	10	-2656.39
APX10a	0.05,0.01	12	-2481.93
CSD1	0.12,0.82	20	-2033.55
CSD3	0.17,0.79	16	-1817.15
CSD4	0.27,1.24	12	-2758.09
FSD1	0.23,2.22	14	-1256.02
FSD3	0.26,1.08	10	-2179.17
MSD1	0.15,1.03	16	-2206.99
MSD2	0.15,1.03	16	-2206.99
CAT1	0.17,1.89	10	-3838.3
CAT2	0.31,4.74	14	-4198.98
M8 beta＆w＞1	p,q,f0,f1,ω			M8 vs M7
APX1	0.18,1.40,0.99,0.01,999.00	14	-2205.72	2	3.32741	APX1	0.189436
APX3	0.38,4.42,1.00,0.00,3.78	14	-2606.29	2	3.15865	APX3	0.206114
APX6	0.31,0.71,1.00,0.00,1.00	14	-3518.45	2	1.2e-05	APX6	0.999994
APX7	0.08,0.08,0.99,0.01,6.65	12	-2128.93	2	1.01754	APX7	0.601233
APX10	0.59,2.92,0.98,0.02,2.95	12	-2653.04	2	6.70684	APX10	0.0349645
APX10a	1.59,1.96,0.35,0.65,2.52	14	-2479.34	2	5.18071	APX10a	0.0749936
CSD1	0.12,0.82,1.00,0.00,1.02	22	-2033.55	2	3.2e-05	CSD1	0.999984
CSD3	0.63,7.72,0.89,0.11,1.2	18	-1813.57	2	7.1653	CSD3	0.0278019
CSD4	0.34,2.09,0.95,0.05,1.00	14	-2758.01	2	0.162818	CSD4	0.921817
FSD1	0.23,2.22,1.00,0.00,1.00	16	-1256.02	2	0.000786	FSD1	0.999607
FSD3	7.53,99.00,0.84,0.16,1.00	12	-2178.97	2	0.398886	FSD3	0.819187
MSD1	0.36,5.16,0.92,0.08,1.00	18	-2206.46	2	1.05469	MSD1	0.590169
MSD2	0.36,5.16,0.92,0.08,1.00	18	-2206.46	2	1.05469	MSD2	0.590169
CAT1	0.16,1.88,0.99,0.01,1.00	12	-3838.3	2	0.001158	CAT1	0.999421
CAT2	0.40,5.19,0.99,0.01,19.16	16	-4198.98	2	0.000822	CAT2	0.999589

## Sheet: branch model
Model	Estimates of parameters	NP	lnL	χ2	df	Test	P
APX1					One-ratio vs Two-ratios
One-ratio	ω0=0.11	11	-2231.91
Two-ratios	ω0=0.11 ω=0.11	12	-2231.91	0.000906	1	APX1	0.975987
APX3
One-ratio	ω0=0.07	11	-2635.07
Two-ratios	ω0=0.09 ω=0.03	12	-2632.92	4.28951	1	APX3	0.0383482
APX6
One-ratio	ω0=0.26	11	-3560.01
Two-ratios	ω0=0.24 ω=0.32	12	-3559.48	1.05092	1	APX6	0.305294
APX7
One-ratio	ω0=0.46	9	-2146.43
Two-ratios	ω0=0.42 ω=0.62	10	-2145.83	1.20548	1	APX7	0.27223
APX10
One-ratio	ω0=0.15	9	-2686.09
Two-ratios	ω0=0.13 ω=0.28	10	-2684.95	2.28676	1	APX10	0.130482
APX10a
One-ratio	ω0=1.51	11	-2485.98
Two-ratios	ω0=1.38 ω=2.26	12	-2485.11	1.73266	1	APX10a	0.188071
CSD1
One-ratio	ω0=0.10	19	-2095.71
Two-ratios	ω0=0.11 ω=0.07	20	-2095.44	0.542038	1	CSD1	0.461589
CSD3
One-ratio	ω0=0.14	11	-1340.26
Two-ratios	ω0=0.14 ω=0.09	12	-1340.17	0.167466	1	CSD3	0.682374
CSD4
One-ratio	ω0=0.15	11	-2782.33
Two-ratios	ω0=0.14 ω=0.21	12	-2781.8	1.06007	1	CSD4	0.3032
FSD1
One-ratio	ω0=0.08	13	-1264.71
Two-ratios	ω0=0.08 ω=0.09	14	-1264.69	0.02398	1	FSD1	0.876936
FSD3
One-ratio	ω0=0.09	13	-1267.19
Two-ratios	ω0=0.09 ω=0.08	14	-1267.36	0.337976	1	FSD3	0.561
MSD1
One-ratio	ω0=0.11	15	-2237.33
Two-ratios	ω0=0.10 ω=0.13	16	-2237.23	0.211366	1	MSD1	0.645699
MSD2
One-ratio	ω0=0.11	15	-2237.33
Two-ratios	ω0=0.10 ω=0.13	16	-2237.23	0.211366	1	MSD2	0.645699
CAT1
One-ratio	ω0=0.07	9	-3859.97
Two-ratios	ω0=0.07, ω=0.08	10	-3858.1	3.73817	1	CAT1	0.0531826
CAT2
One-ratio	ω0=0.05	11	-3240.15
Two-ratios	ω0=0.05, ω=0.07	12	-3239.21	1.87586	1	CAT2	0.170805

## Sheet: branch-site model
Mode	Estimates of parameters	NP	InL	χ2	df	P	BEB
CAT1
Model A0	proportion 0.90 0.07 0.02 0.00
	background w 0.03 1.00 0.03 1.00	13	-4190.99		Model A0 VS Model A1
	foreground w 0.03 1.00 1.00 1.00			5.07016	1	0.0243412
Model A1	proportion 0.92 0.07 0.00 0.00						164 T 0.950*
	background w 0.03 1.00 0.03 1.00	14	-4188.46				260 M 0.964*
	foreground w 0.03 1.00 949.40 949.40						465 A 0.956*
CAT2
Model A0	proportion 0.90 0.03 0.07 0.00
	background w 0.04 1.00 0.04 1.00	13	-3222.64		Model A0 VS Model A1
	foreground w 0.04 1.00 1.00 1.00			0	1	1
Model A1	proportion 0.90 0.03 0.07 0.00
	background w 0.04 1.00 0.04 1.00	14	-3222.64
	foreground w 0.04 1.00 1.00 1.00
APX1
Model A0	proportion 0.88 0.08 0.04 0.00
	background w 0.05 1.00 0.05 1.00	13	-2205.67
	foreground w 0.05 1.00 1.00 1.00			0.813886	1	0.366974
Model A1	proportion 0.90 0.08 0.02 0.00
	background w 0.05 1.00 0.05 1.00	14	-2205.26
	foreground w 0.05 1.00 4.10 4.10
APX3
Model A0	proportion 0.92 0.08 0.00 0.00
	background w 0.05 1.00 0.05 1.00	13	-2622.37
	foreground w 0.05 1.00 1.00 1.00			0	1	1
Model A1	proportion 0.92 0.08 0.00 0.00
	background w 0.05 1.00 0.05 1.00	14	-2622.37
	foreground w 0.05 1.00 1.00 1.00
APX6
Model A0	proportion 0.65 0.25 0.07 0.03
	background w 0.08 1.00 0.08 1.00	13	-3520.44
	foreground w 0.08 1.00 1.00 1.00			2.1	1	0.147299
Model A1	proportion 0.70 0.26 0.02 0.01
	background w 0.09 1.00 0.09 1.00	14	-3518.34
	foreground w 0.09 1.00 49.37 49.37
APX7
Model A0	proportion 0.40 0.39 0.10 0.10
	background w 0.00 1.00 0.00 1.00	11	-2128.13
	foreground w 0.00 1.00 1.00 1.00			3.36786	1	0.06648
Model A1	proportion 0.48 0.50 0.01 0.01
	background w 0.02 1.00 0.02 1.00	12	-2126.45
	foreground w 0.02 1.00 51.11 51.11
APX10
Model A0	proportion 0.75 0.09 0.14 0.02
	background w 0.09 1.00 0.09 1.00	11	-2655.68
	foreground w 0.09 1.00 1.00 1.00			0.138622	1	0.709655
Model A1	proportion 0.77 0.10 0.19 0.01
	background w 0.09 1.00 0.09 1.00	12	-2655.61
	foreground w 0.09 1.00 1.29 1.29
APX10a
Model A0	proportion 0.11 0.79 0.01 0.09
	background w 0.01 1.00 0.01 1.00	13	-2482.81
	foreground w 0.01 1.00 1.00 1.00
Model A1	proportion 0.09 0.57 0.05 0.29
	background w 0.00 1.00 0.00 1.00	14	-2479.33	3.47766	1	0.0622027
	foreground w 0.00 1.00 7.31 7.31
CSD1
Model A0	proportion 0.75 0.16 0.07 0.02
	background w 0.02 1.00 0.02 1.00	21	-2040.31
	foreground w 0.02 1.00 1.00 1.00
Model A1	proportion 0.79 0.17 0.03 0.01
	background w 0.02 1.00 0.02 1.00	22	-2040	0.63225	1	0.426531
	foreground w 0.02 1.00 4.26 4.26
CSD3
Model A0	proportion 0.85 0.14 0.01 0.00
	background w 0.06 1.00 0.06 1.00	13	-1330.39
	foreground w 0.06 1.00 1.00 1.00
Model A1	proportion 0.86 0.13 0.01 0.00
	background w 0.06 1.00 0.06 1.00	14	-1328.76	3.24649	1	0.0715768
	foreground w 0.06 1.00 37.83 37.83
CSD4
Model A0	proportion 0.79 0.13 0.08 0.01
	background w 0.06 1.00 0.06 1.00	13	-2758.21
	foreground w 0.06 1.00 1.00 1.00
Model A1	proportion 0.79 0.13 0.08 0.01
	background w 0.06 1.00 0.06 1.00	14	-2758.21	0	1	1
	foreground w 0.06 1.00 1.00 1.00
FSD1
Model A0	proportion 0.93 0.03 0.04 0.00
	background w 0.07 1.00 0.07 1.00	15	-1263.39
	foreground w 0.07 1.00 1.00 1.00
Model A1	proportion 0.97 0.02 0.01 0.00
	background w 0.07 1.00 0.07 1.00	16	-1261.79	3.21028	1	0.073177
	foreground w 0.07 1.00 21.77 21.77
FSD3
Model A0	proportion 0.84 0.16 0.00 0.00
	background w 0.07 1.00 0.07 1.00	11	-2178.96
	foreground w 0.07 1.00 1.00 1.00
Model A1	proportion 0.84 0.16 0.00 0.00
	background w 0.07 1.00 0.07 1.00	12	-2178.96	0	1	1
	foreground w 0.07 1.00 1.00 1.00
MSD1
Model A0	proportion 0.90 0.10 0.00 0.00
	background w 0.04 1.00 0.04 1.00	17	-2207.1
	foreground w 0.04 1.00 1.00 1.00
Model A1	proportion 0.90 0.10 0.00 0.00
	background w 0.04 1.00 0.04 1.00	18	-2207.1	0	1	1
	foreground w 0.04 1.00 27.40 27.40
MSD2
Model A0	proportion 0.90 0.10 0.00 0.00
	background w 0.04 1.00 0.04 1.00	17	-2207.1
	foreground w 0.04 1.00 1.00 1.00
Model A1	proportion 0.90 0.10 0.00 0.00
	background w 0.04 1.00 0.04 1.00	18	-2207.1	0	1	1
	foreground w 0.04 1.00 1.00 1.00
