# Supplementary material for: Molecular Mechanism of Response and Adaptation of Antioxidant Enzyme System to Salt Stress in Leaves of Gymnocarpos przewalskii
Source: Plants (Basel). 2023 Sep 25;12(19):3370. doi: 10.3390/plants12193370 (PMC10574792; doi:10.3390/plants12193370)
Supplement: Supplementary file 1 [file plants-12-03370-s001.zip › Table S6 Molecular docking.xlsx]

## Sheet: Sheet1
	Compound	GpCAT1	AsCAT1
Binding energy of complex ( kJ/mol)	1	-3.745	-3.565
	2	-3.448	-3.468
	3	-3.319	-3.276
	4	-3.296	-3.178
	5	-3.283	-3.11
	6	-3.091	-3.083
	7	-3.048	-2.947
	8	-3.043	-2.899
	9	-2.975	-2.895
