# Supplementary figures and images for: Molecular Mechanism of Response and Adaptation of Antioxidant Enzyme System to Salt Stress in Leaves of Gymnocarpos przewalskii
Source: MDPI journal article supplement (doi:10.3390/plants12193370), 2023-09-25

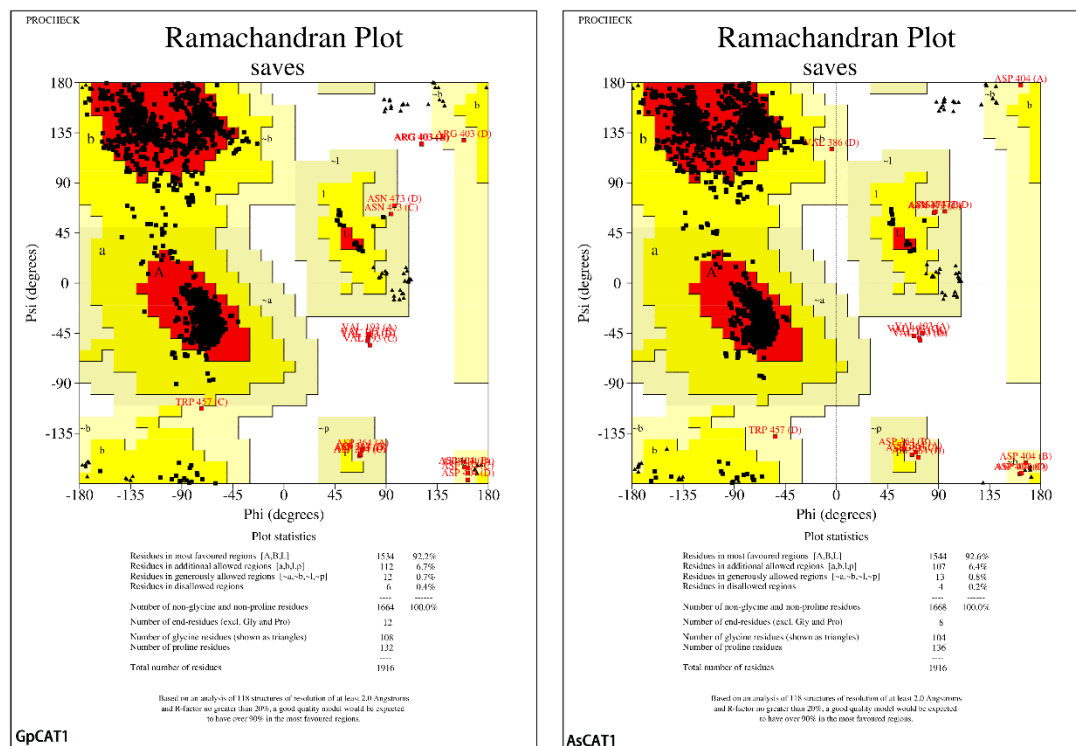

**Figure S1.** GpCAT1 and AsCAT1 protein 3D model quality evaluation results.

Supplement: s1 [file s1]
